# Supplementary material for: scRNA-Seq reveals distinct stem cell populations that drive hair cell regeneration after loss of Fgf and Notch signaling
Source: eLife journal article supplement (doi:10.7554/elife.44431), 2019-01-25

node 16 vs node 17

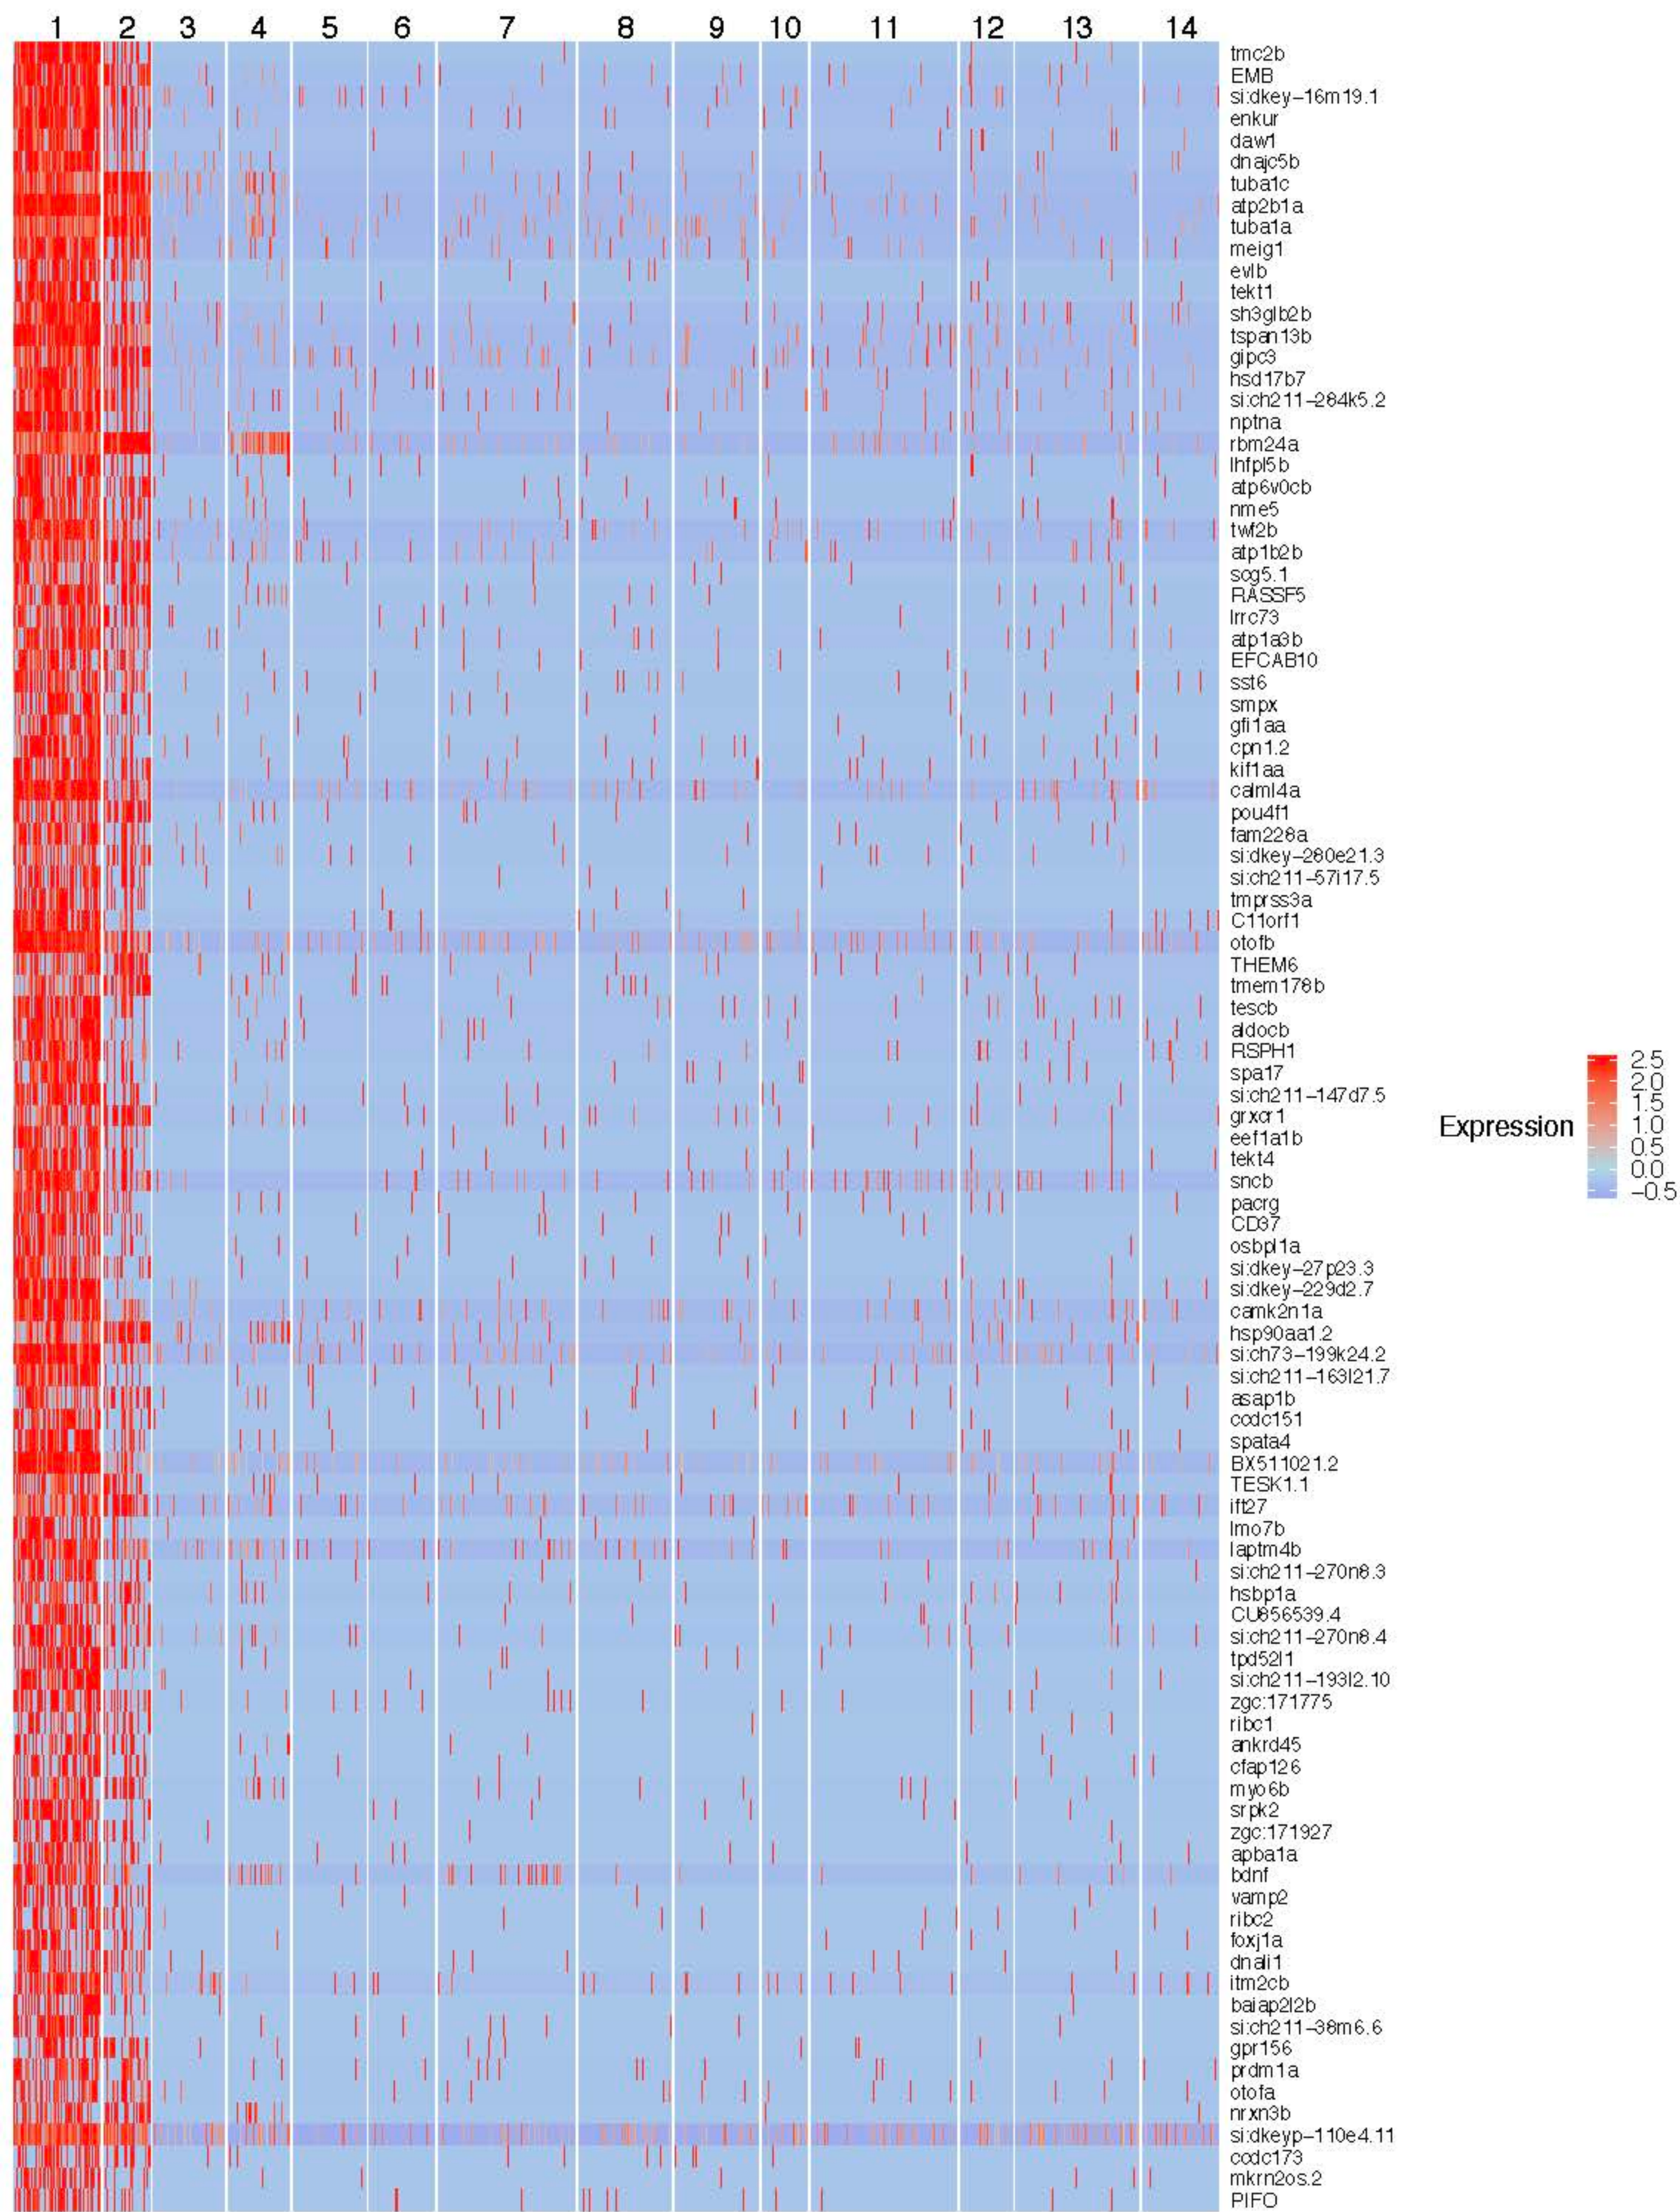

node 17 vs node 16

1 2 3 4 5 6 7 8 9 10 11 12 13 14

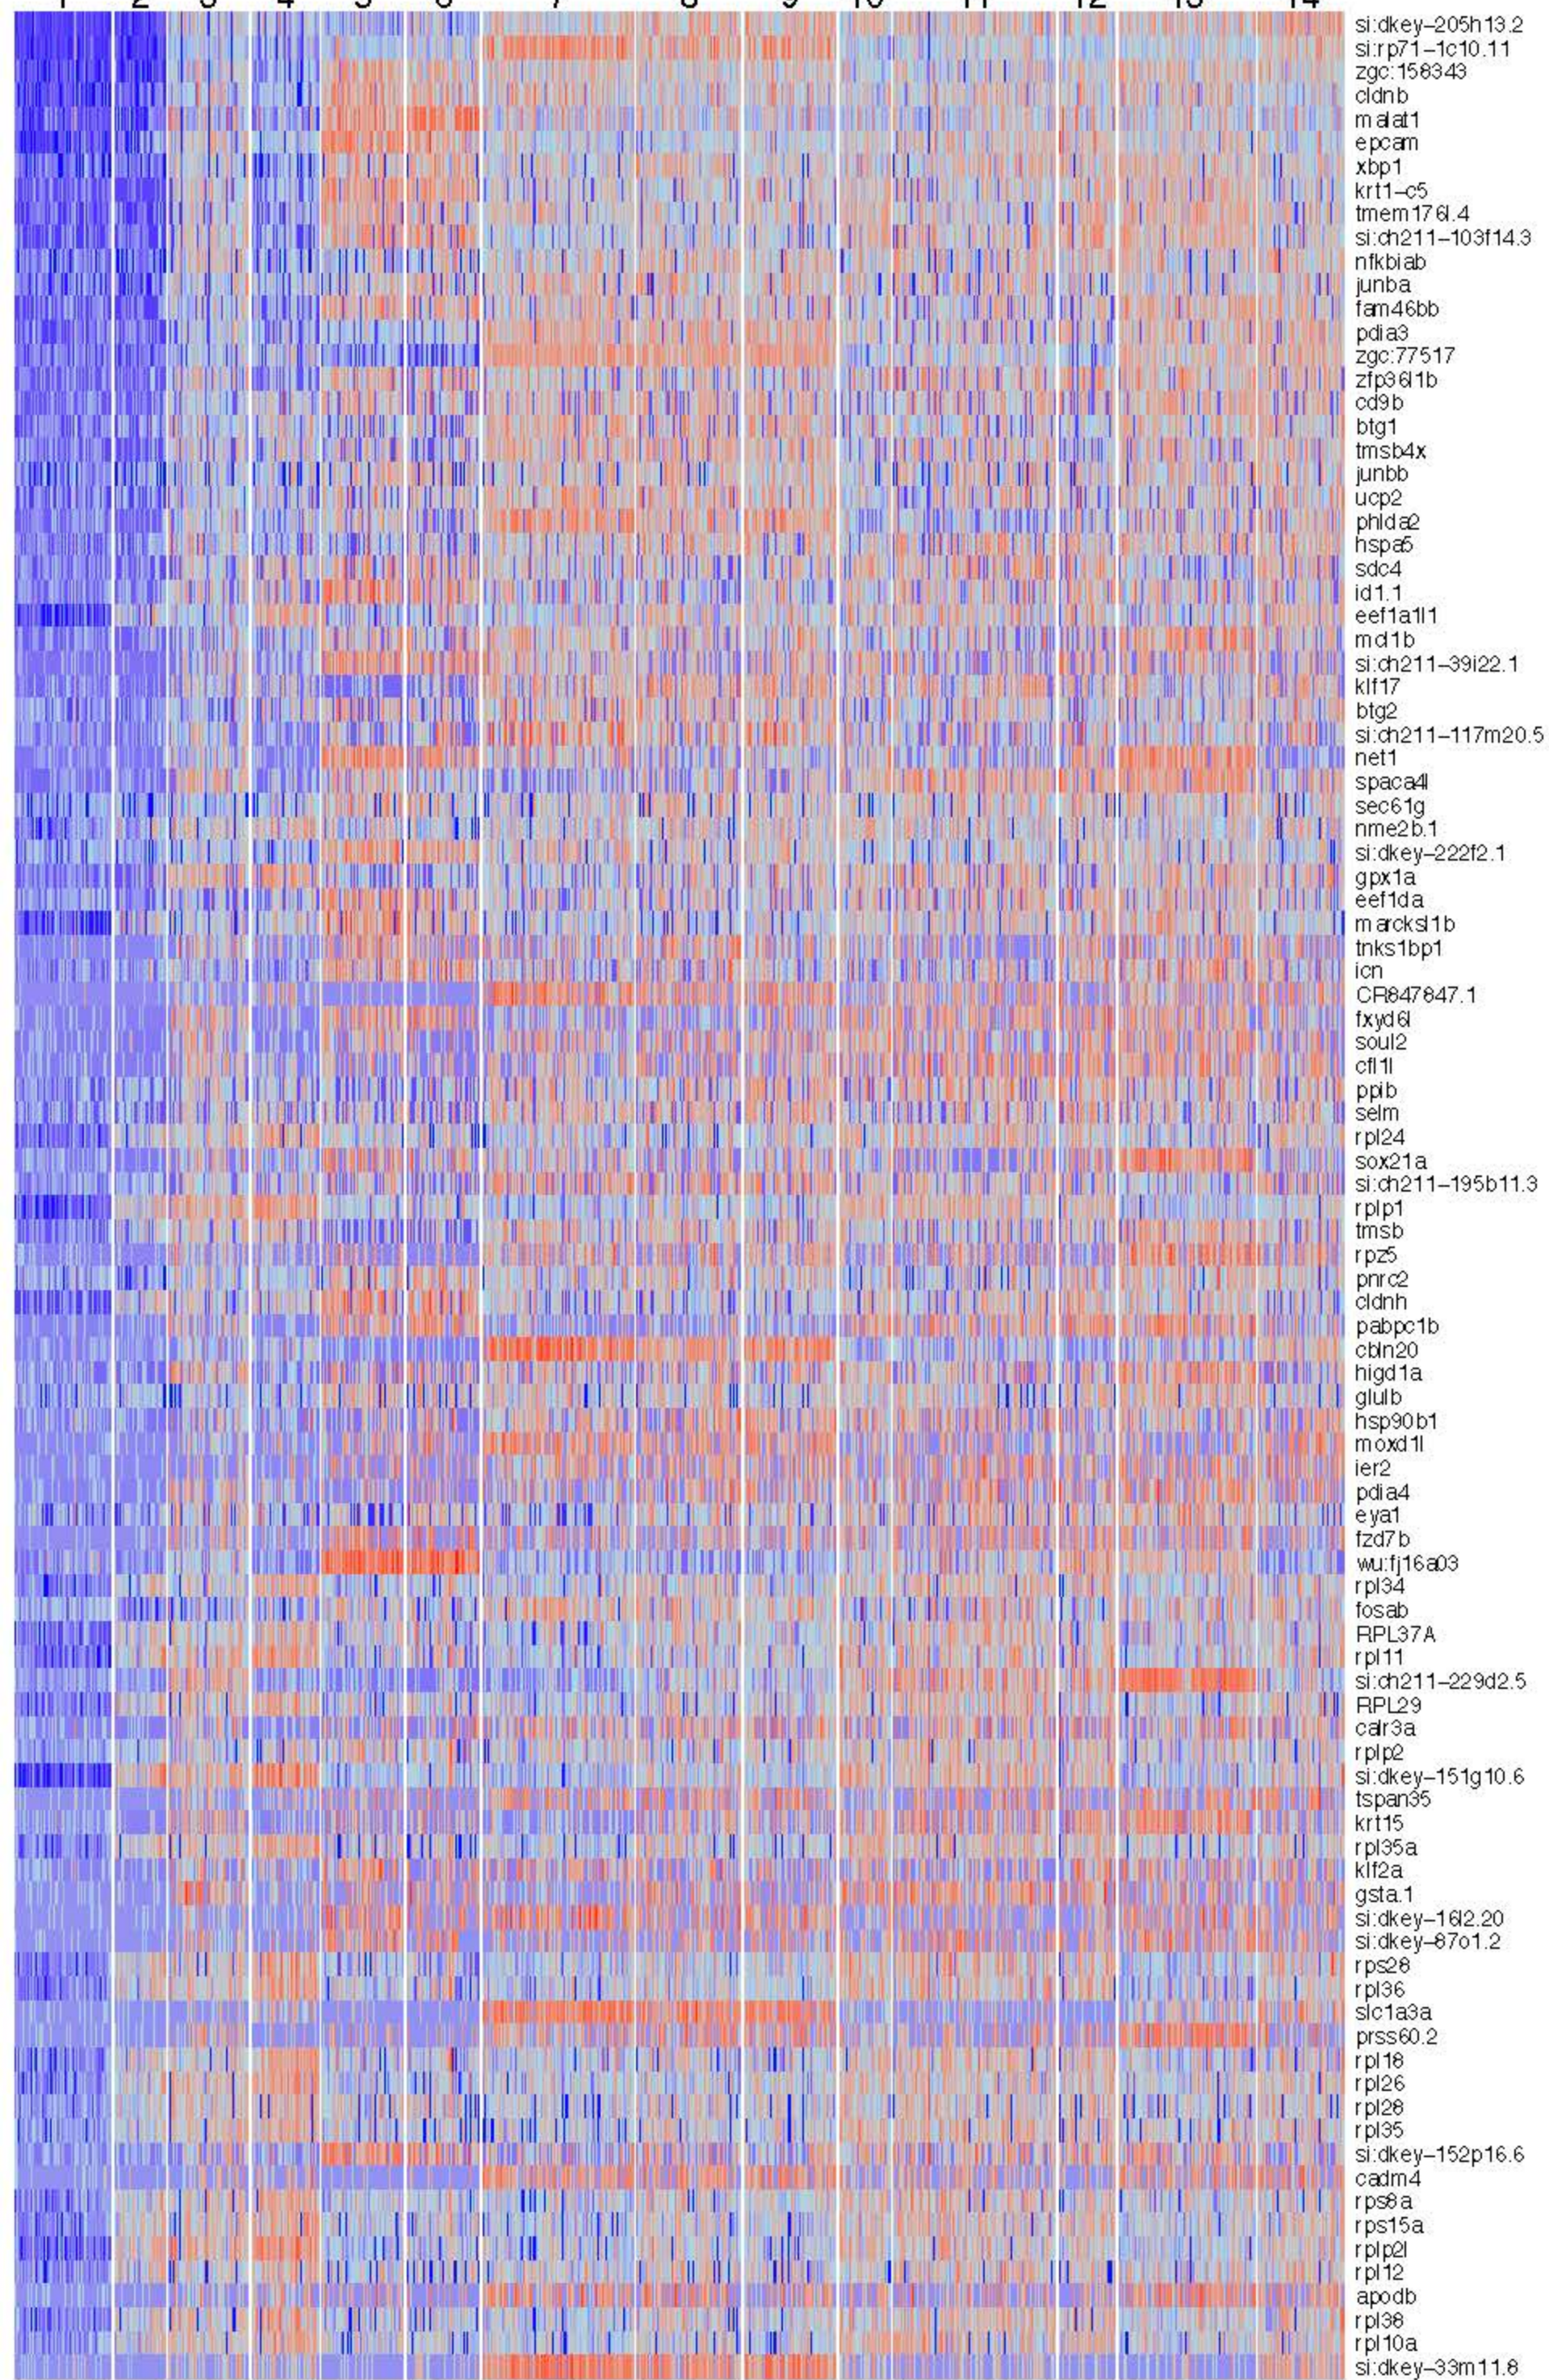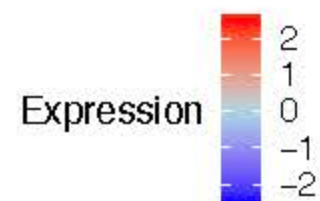

cluster 1 vs cluster 2

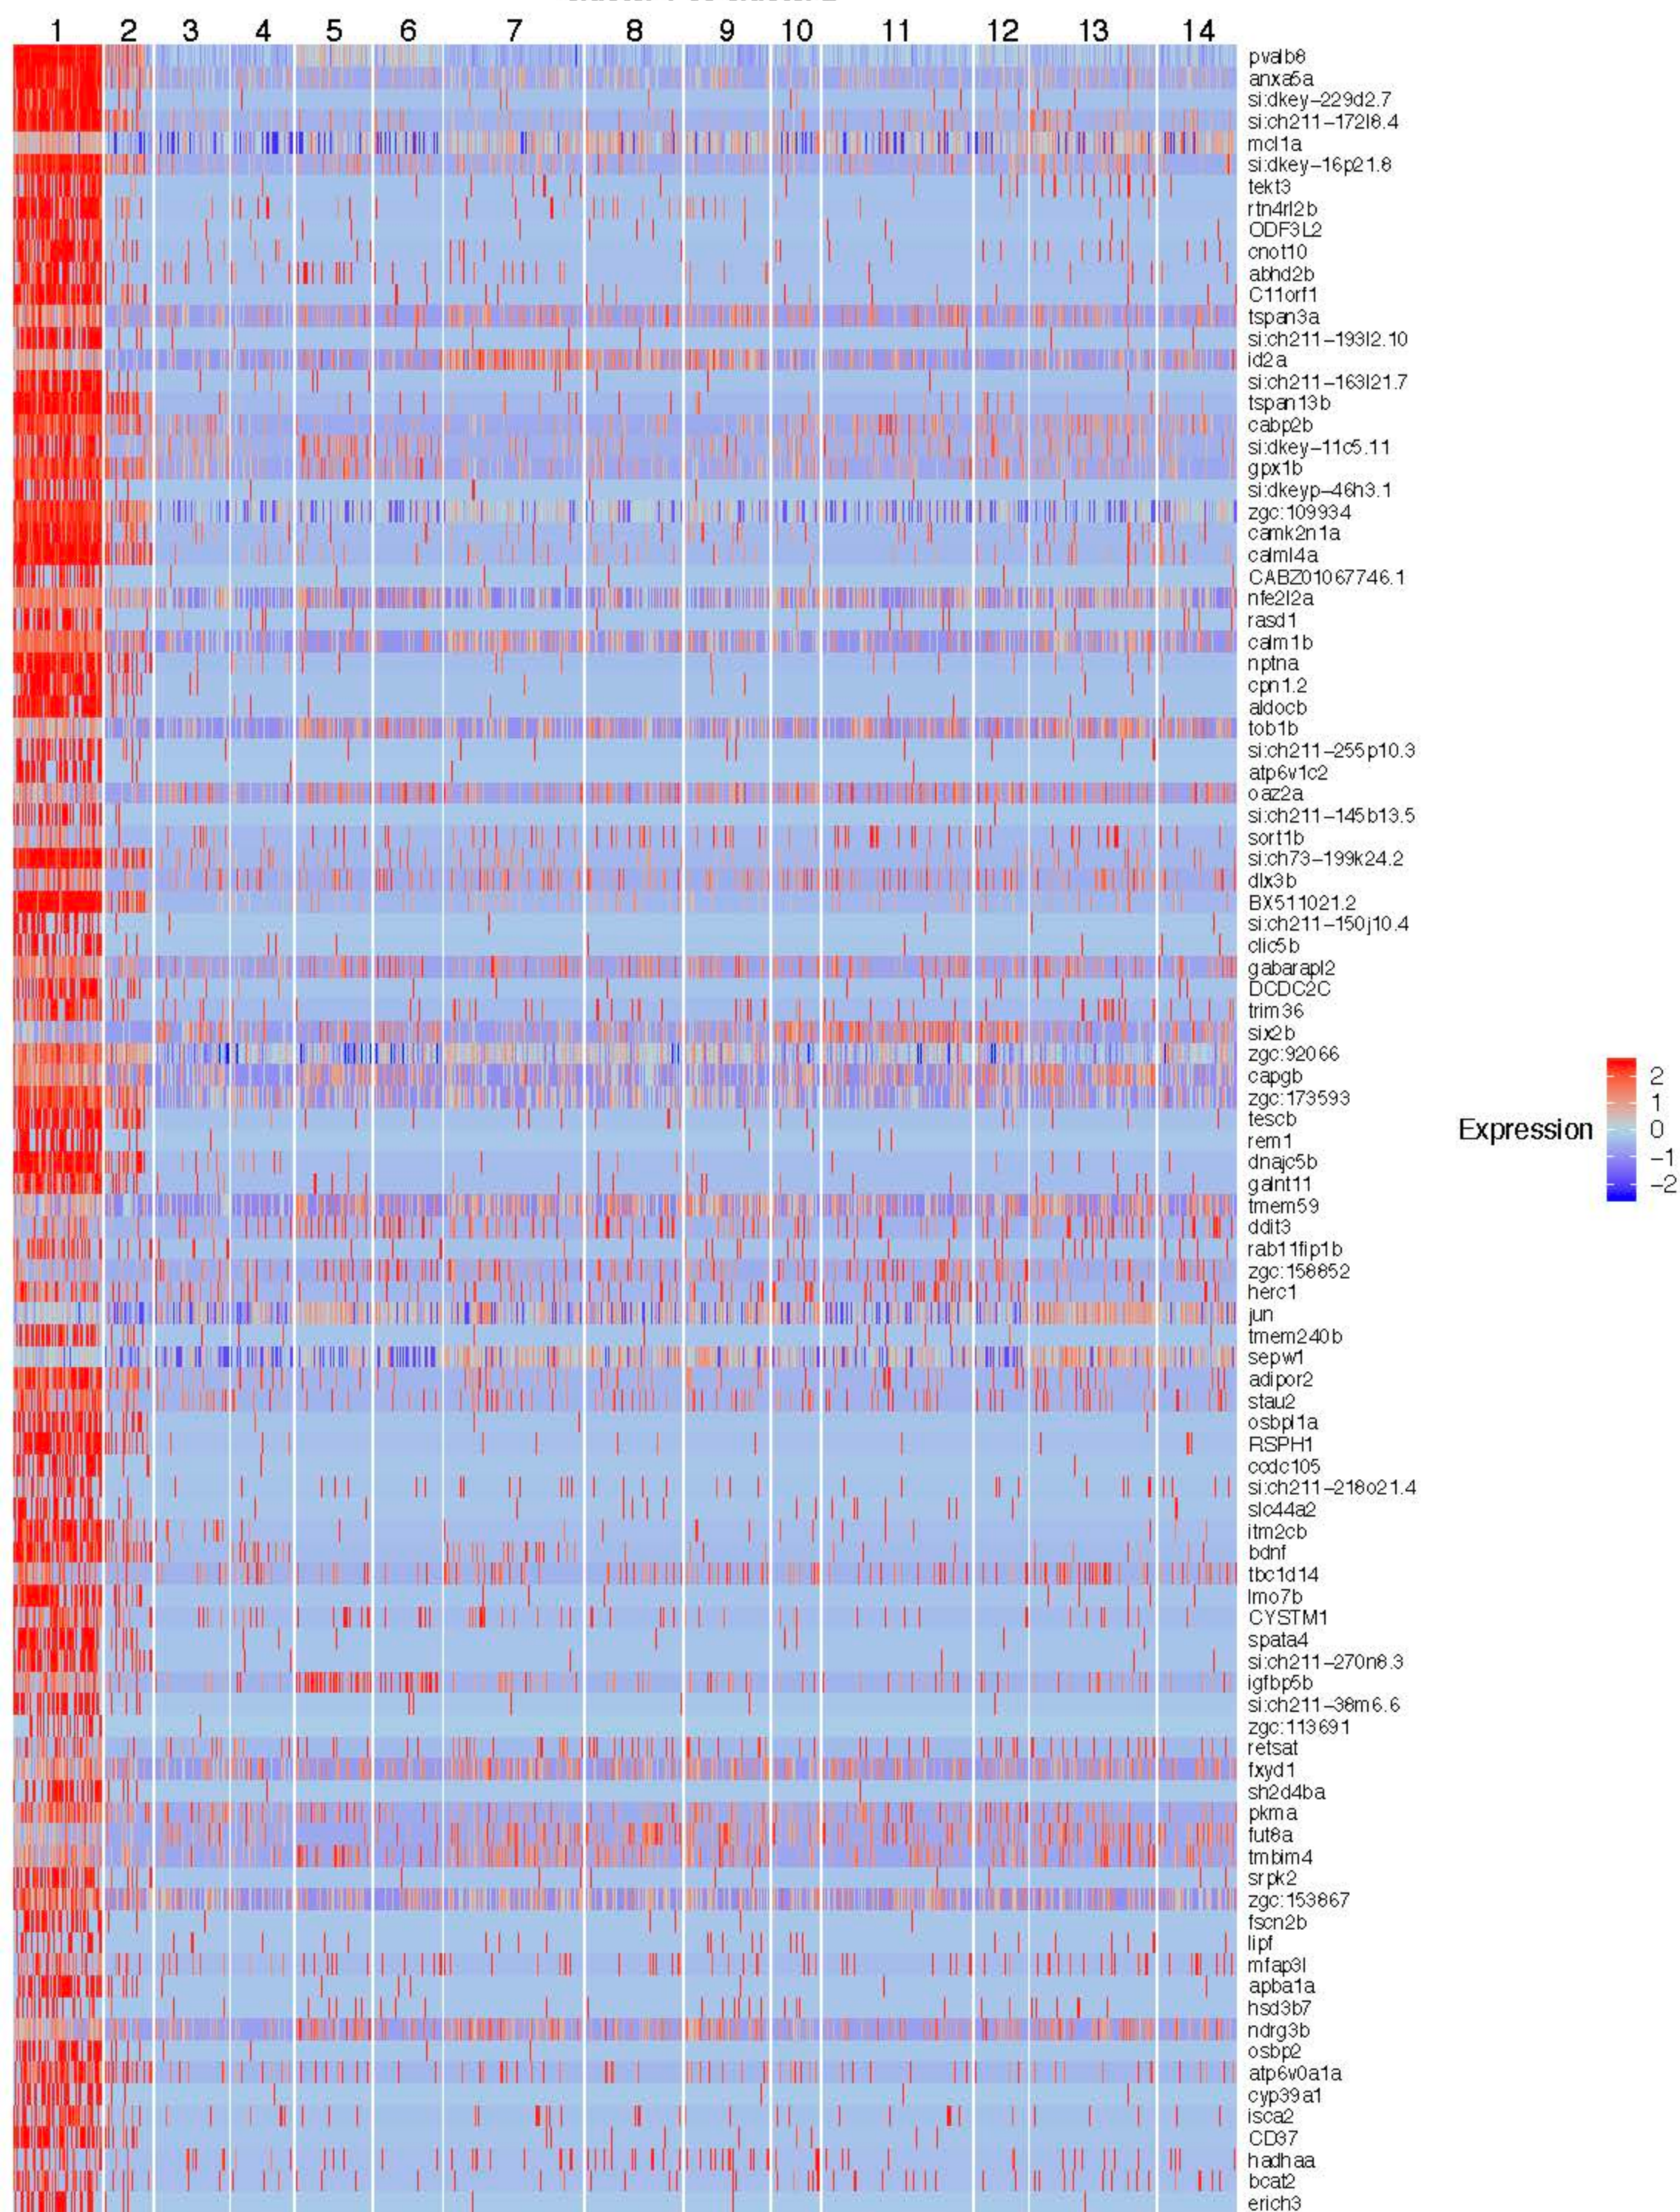

cluster 2 vs cluster 1

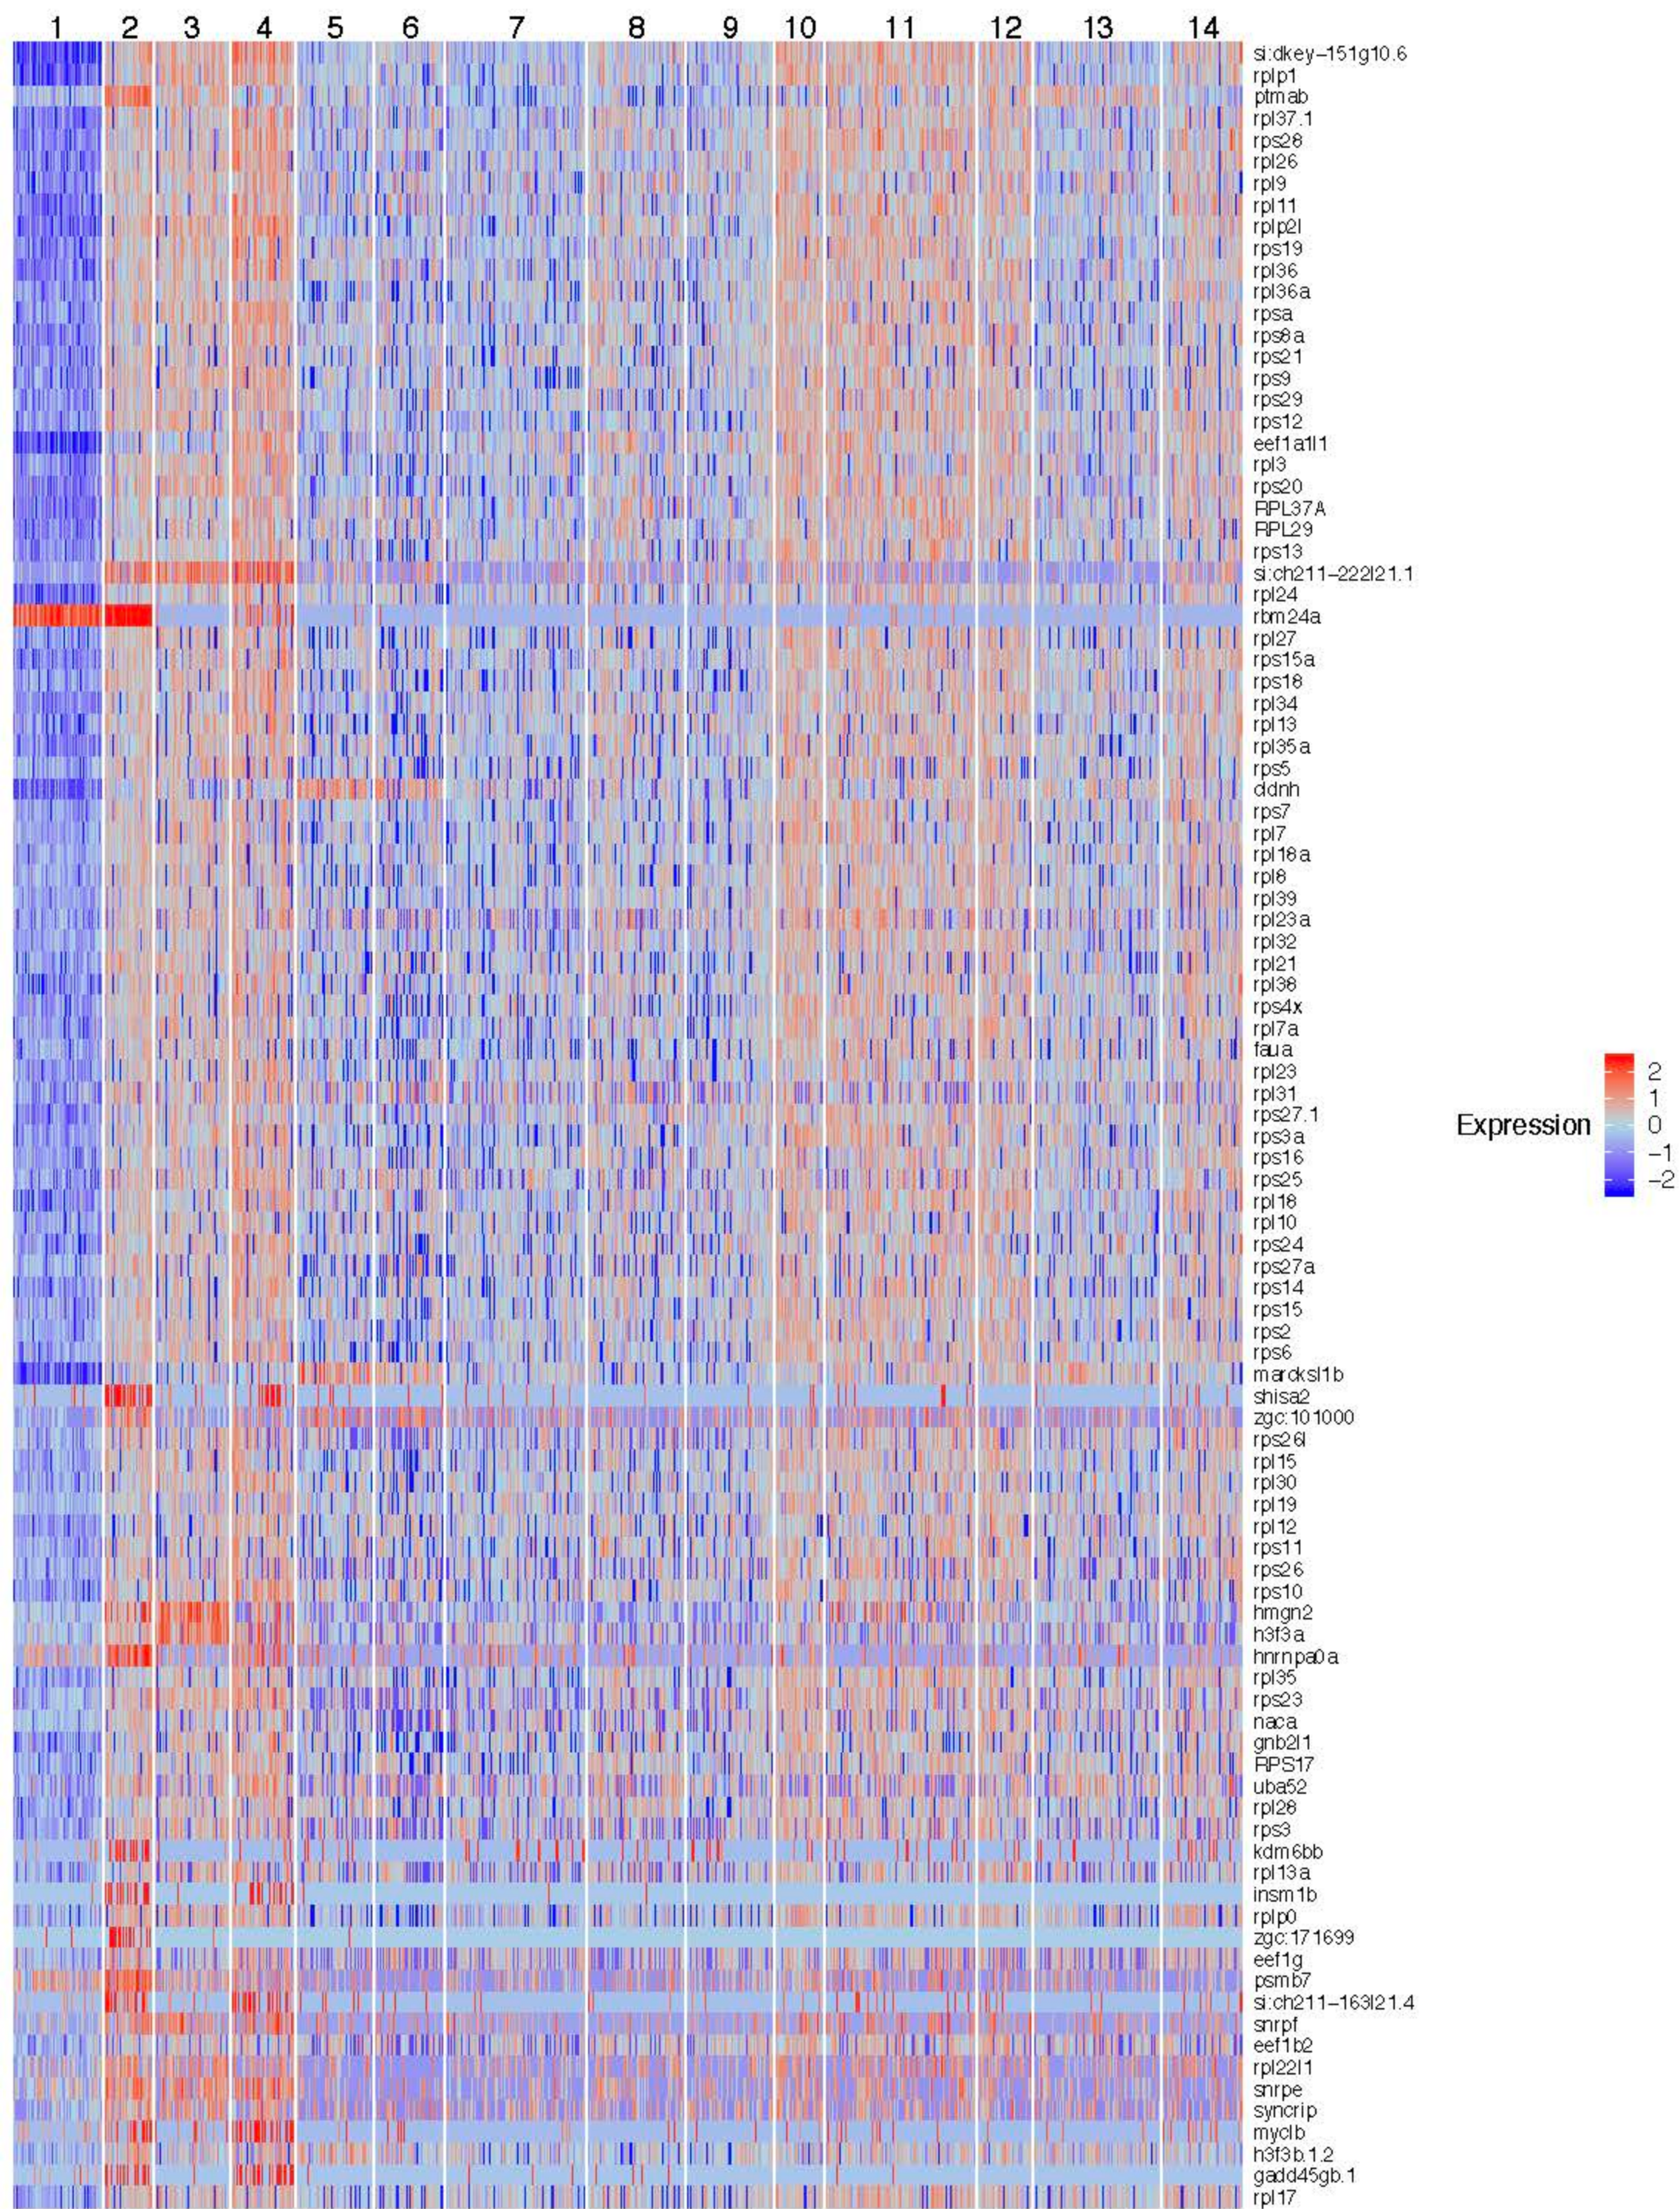

node 18 vs node 19

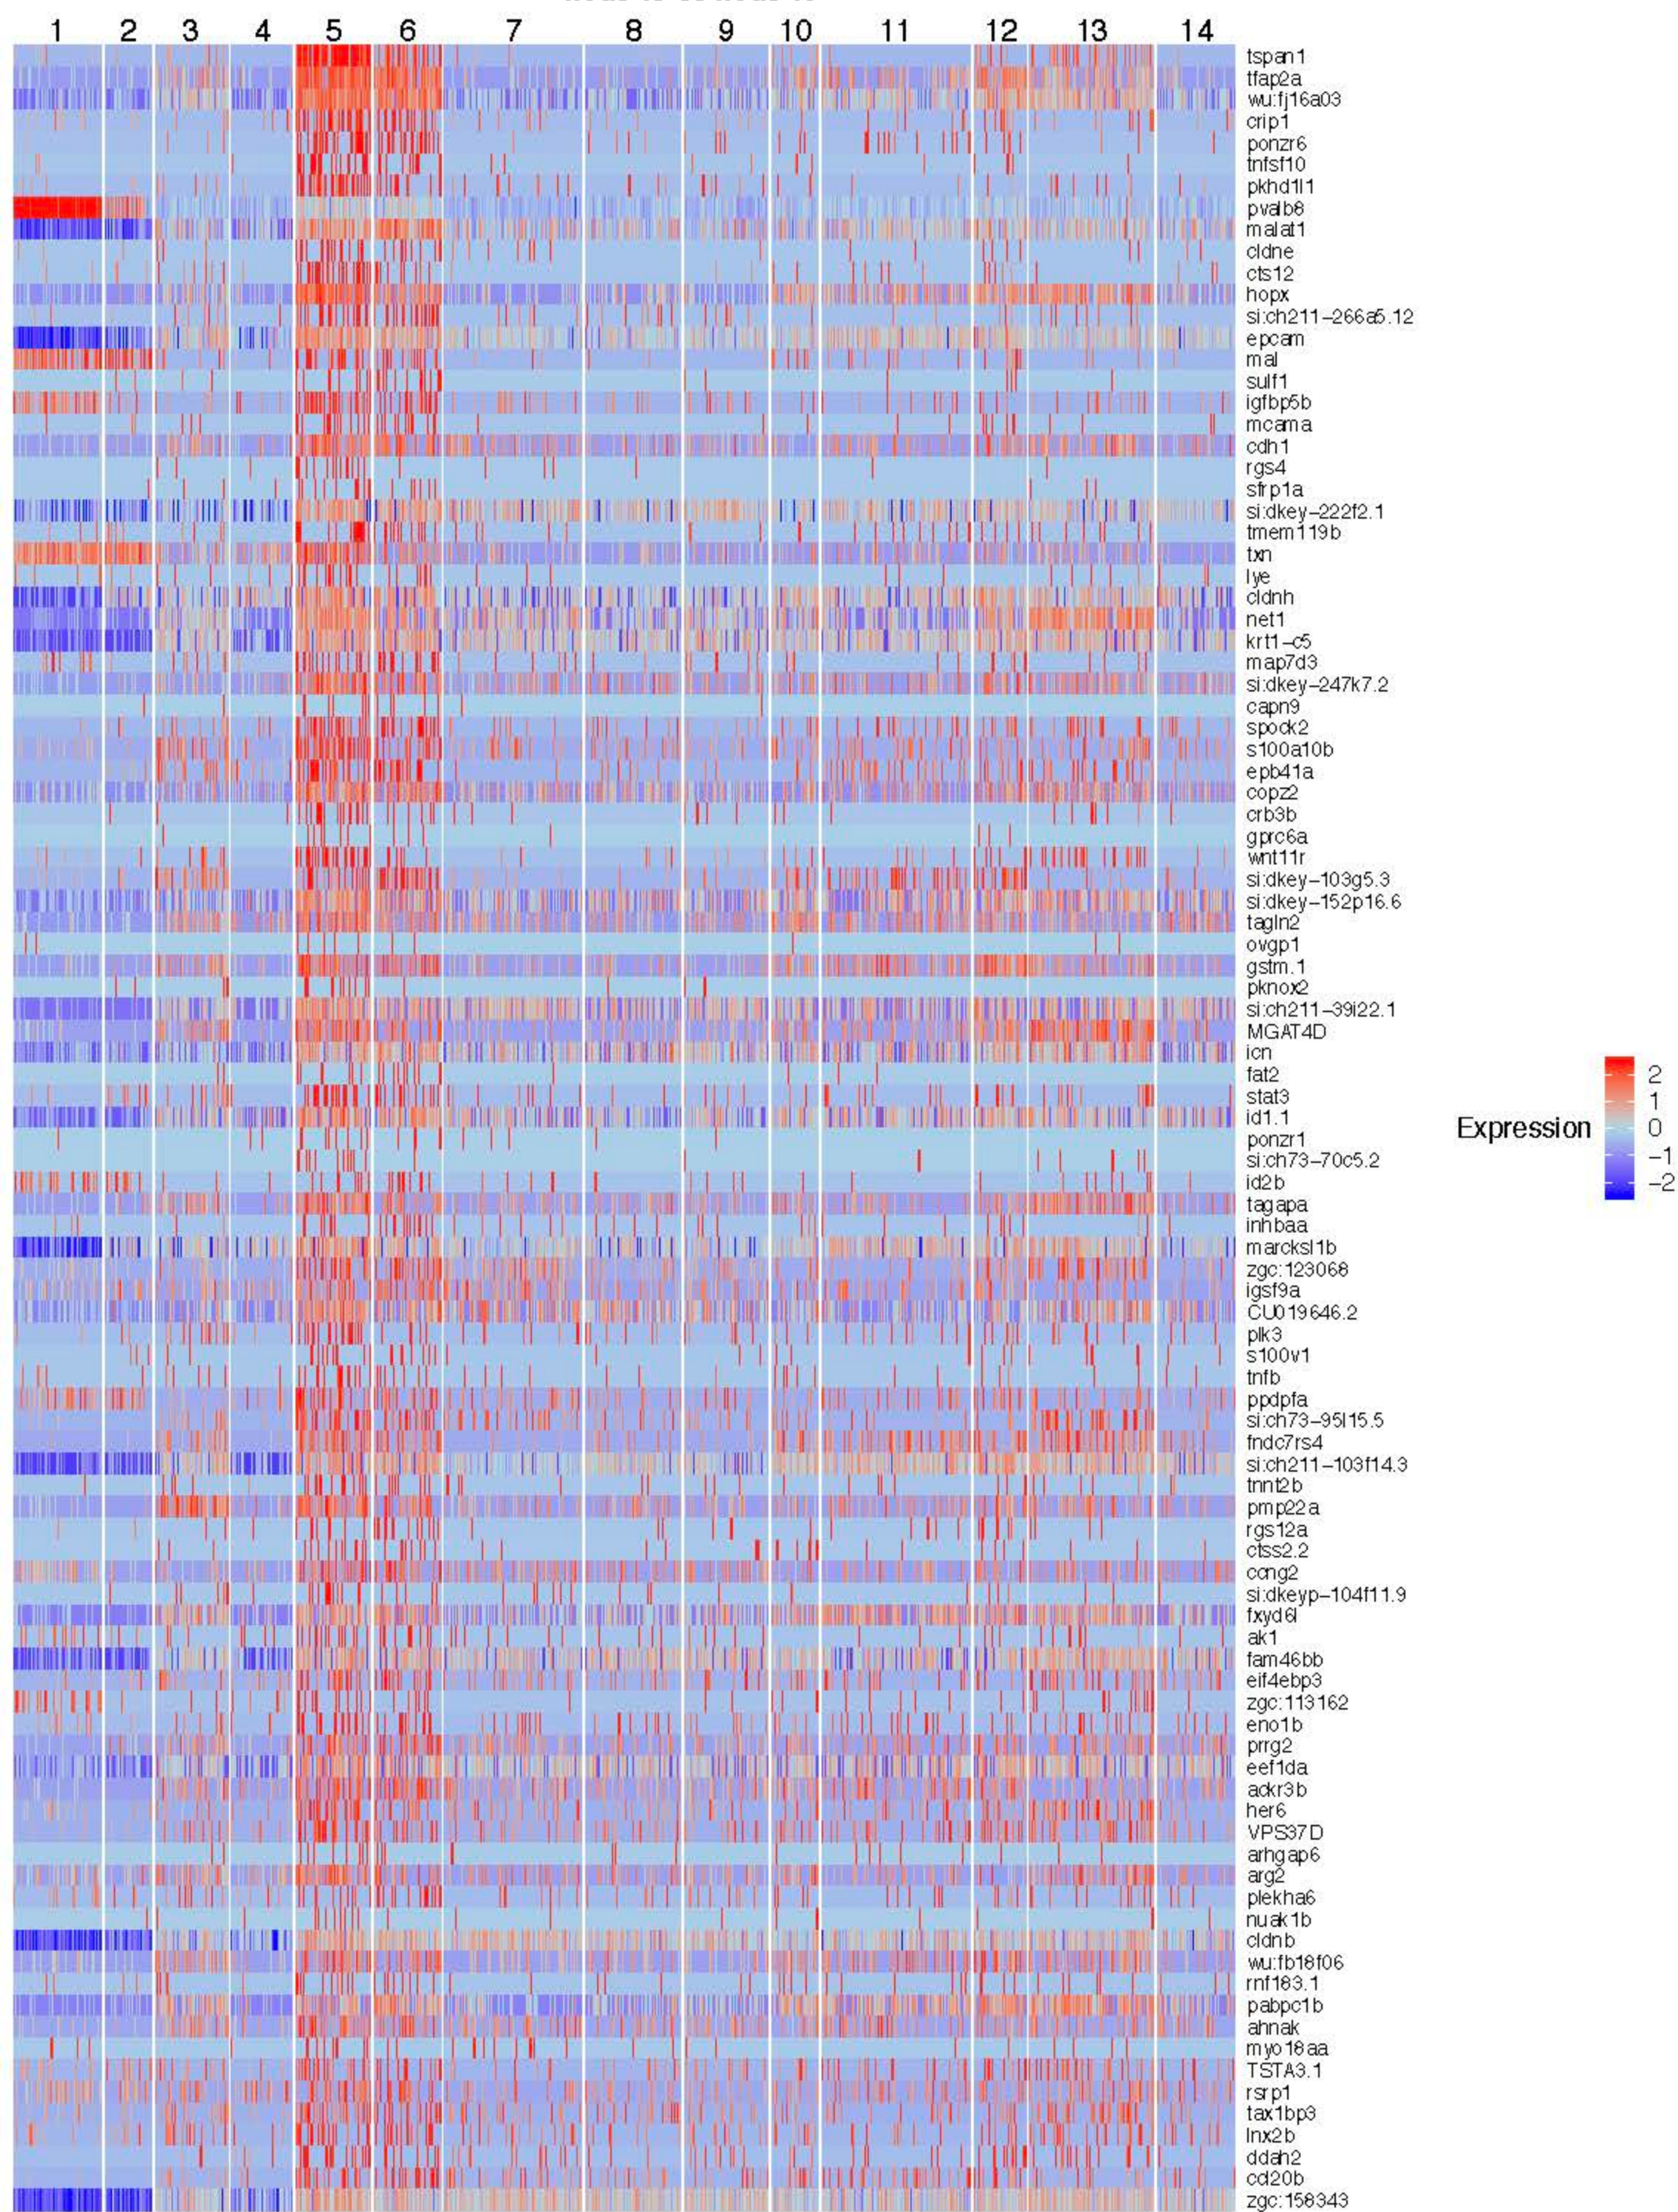

node 19 vs node 18

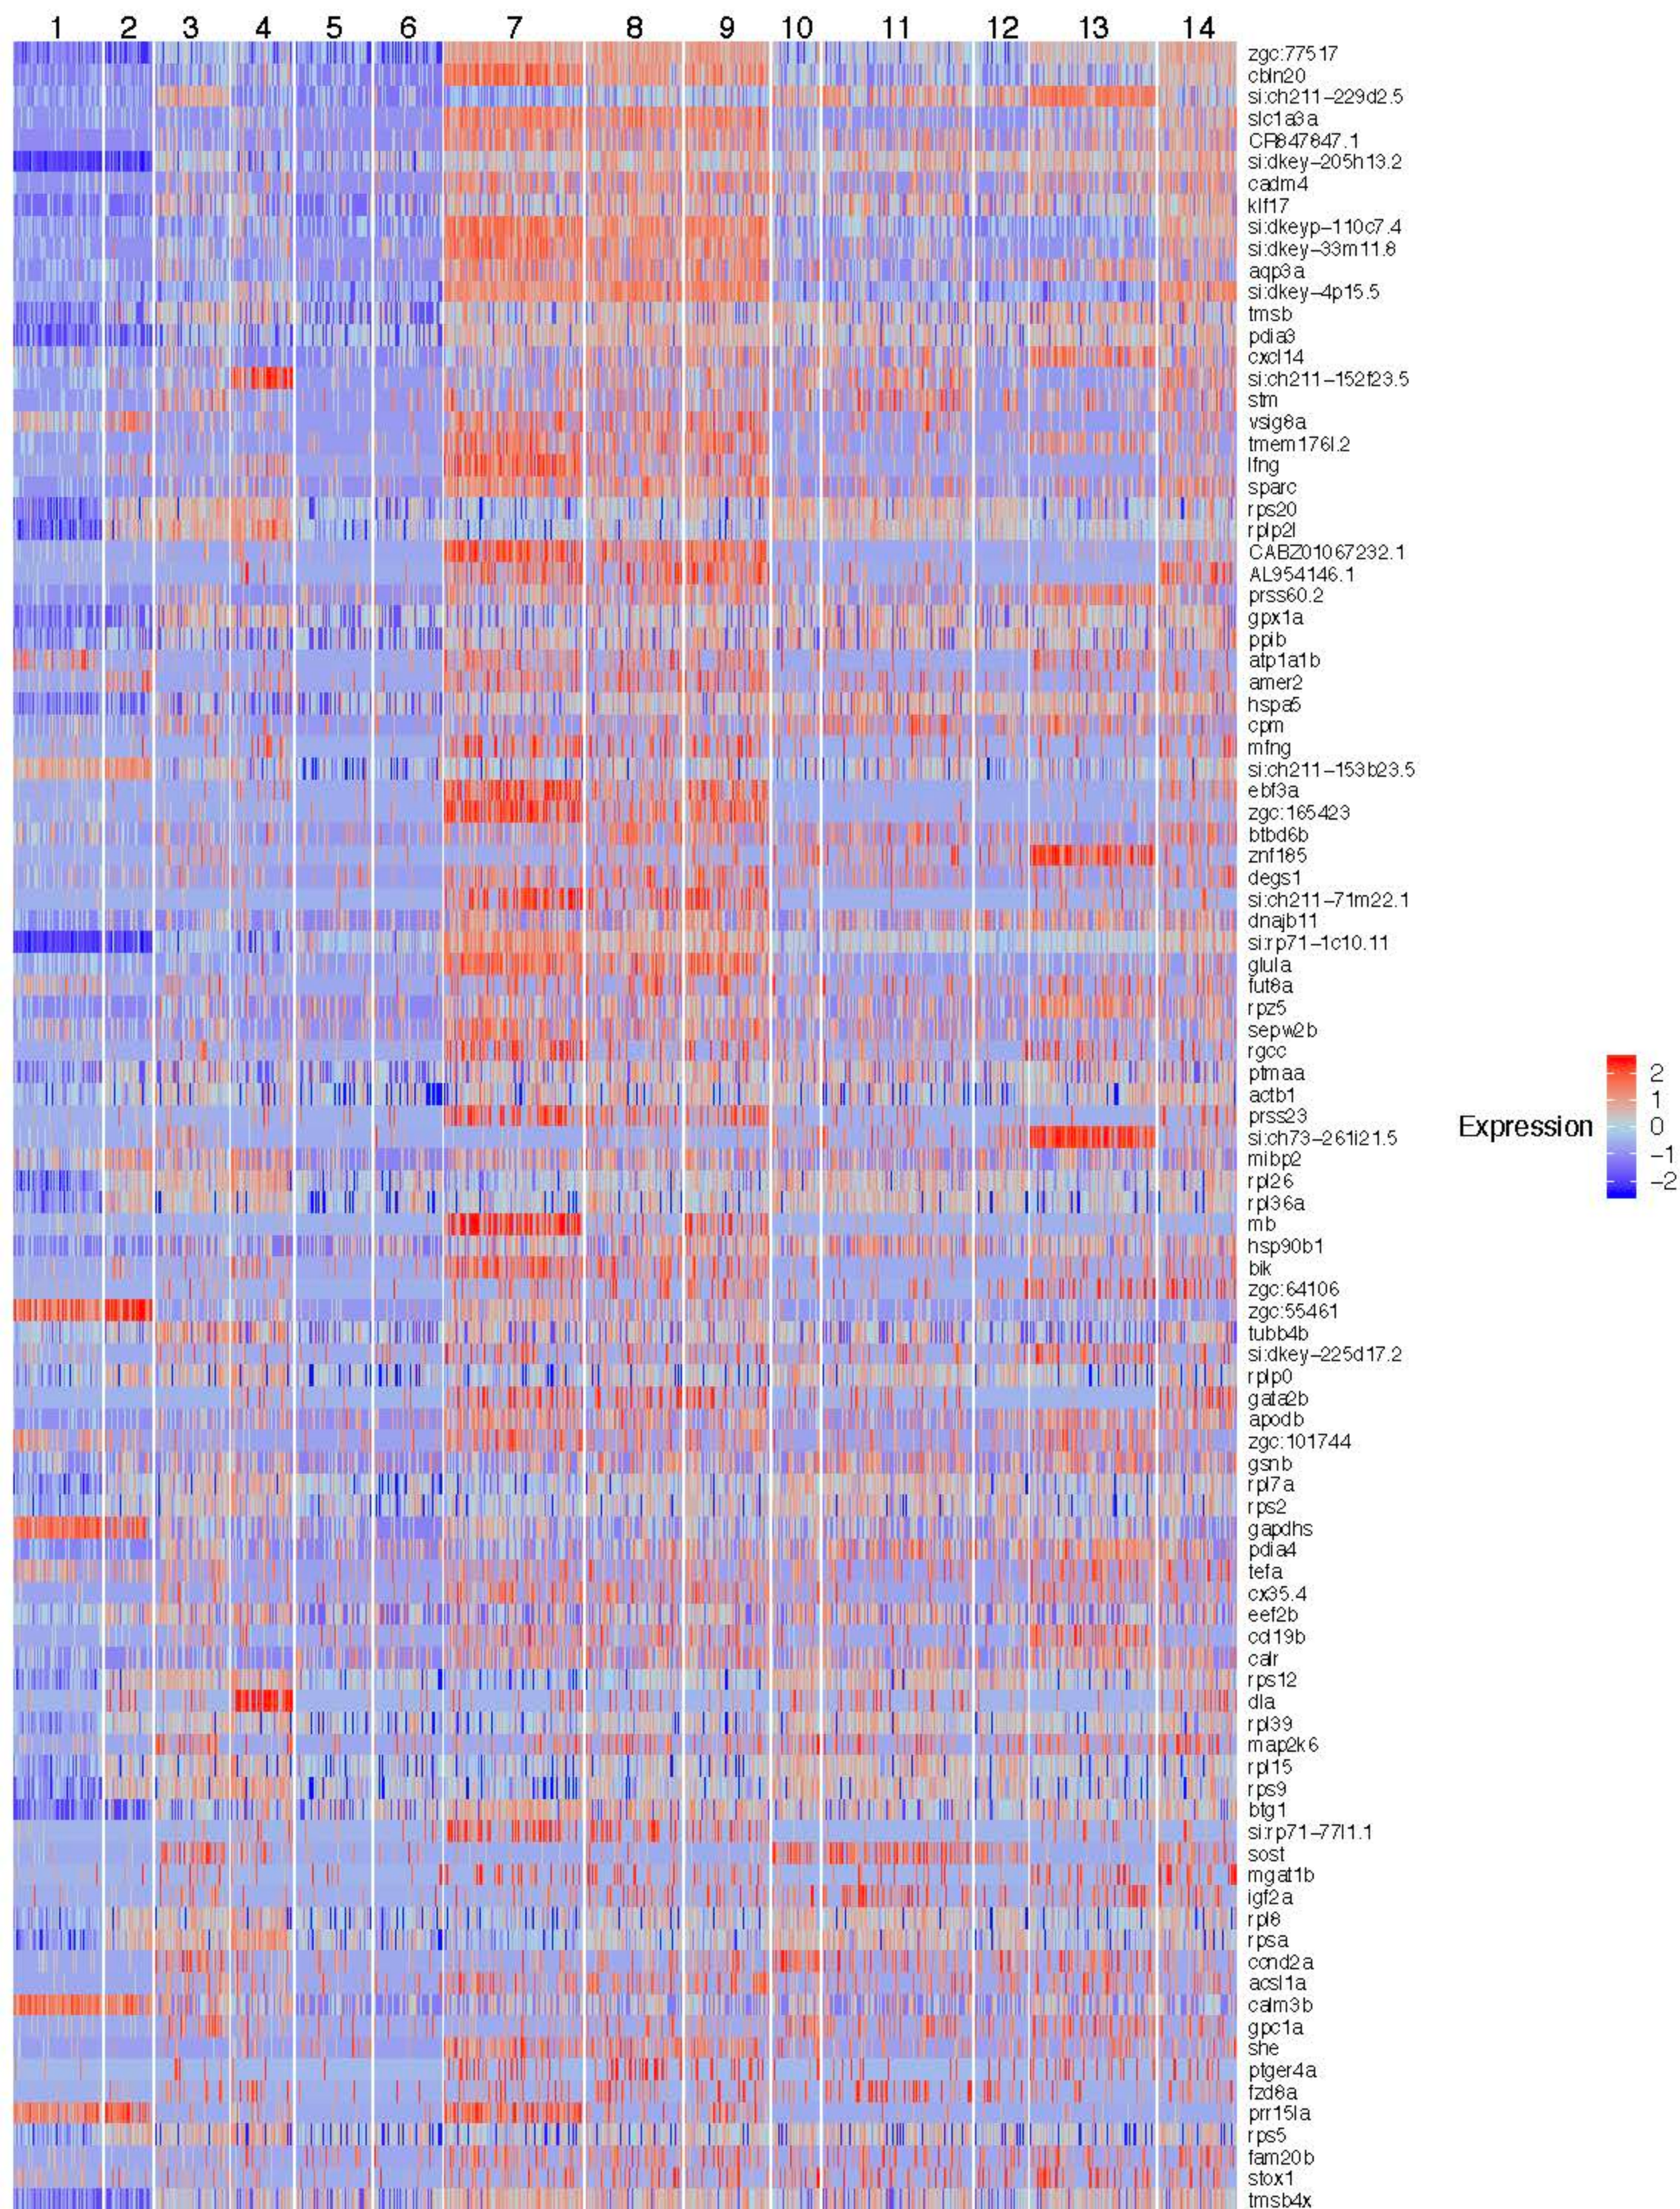

cluster 5 vs cluster 6

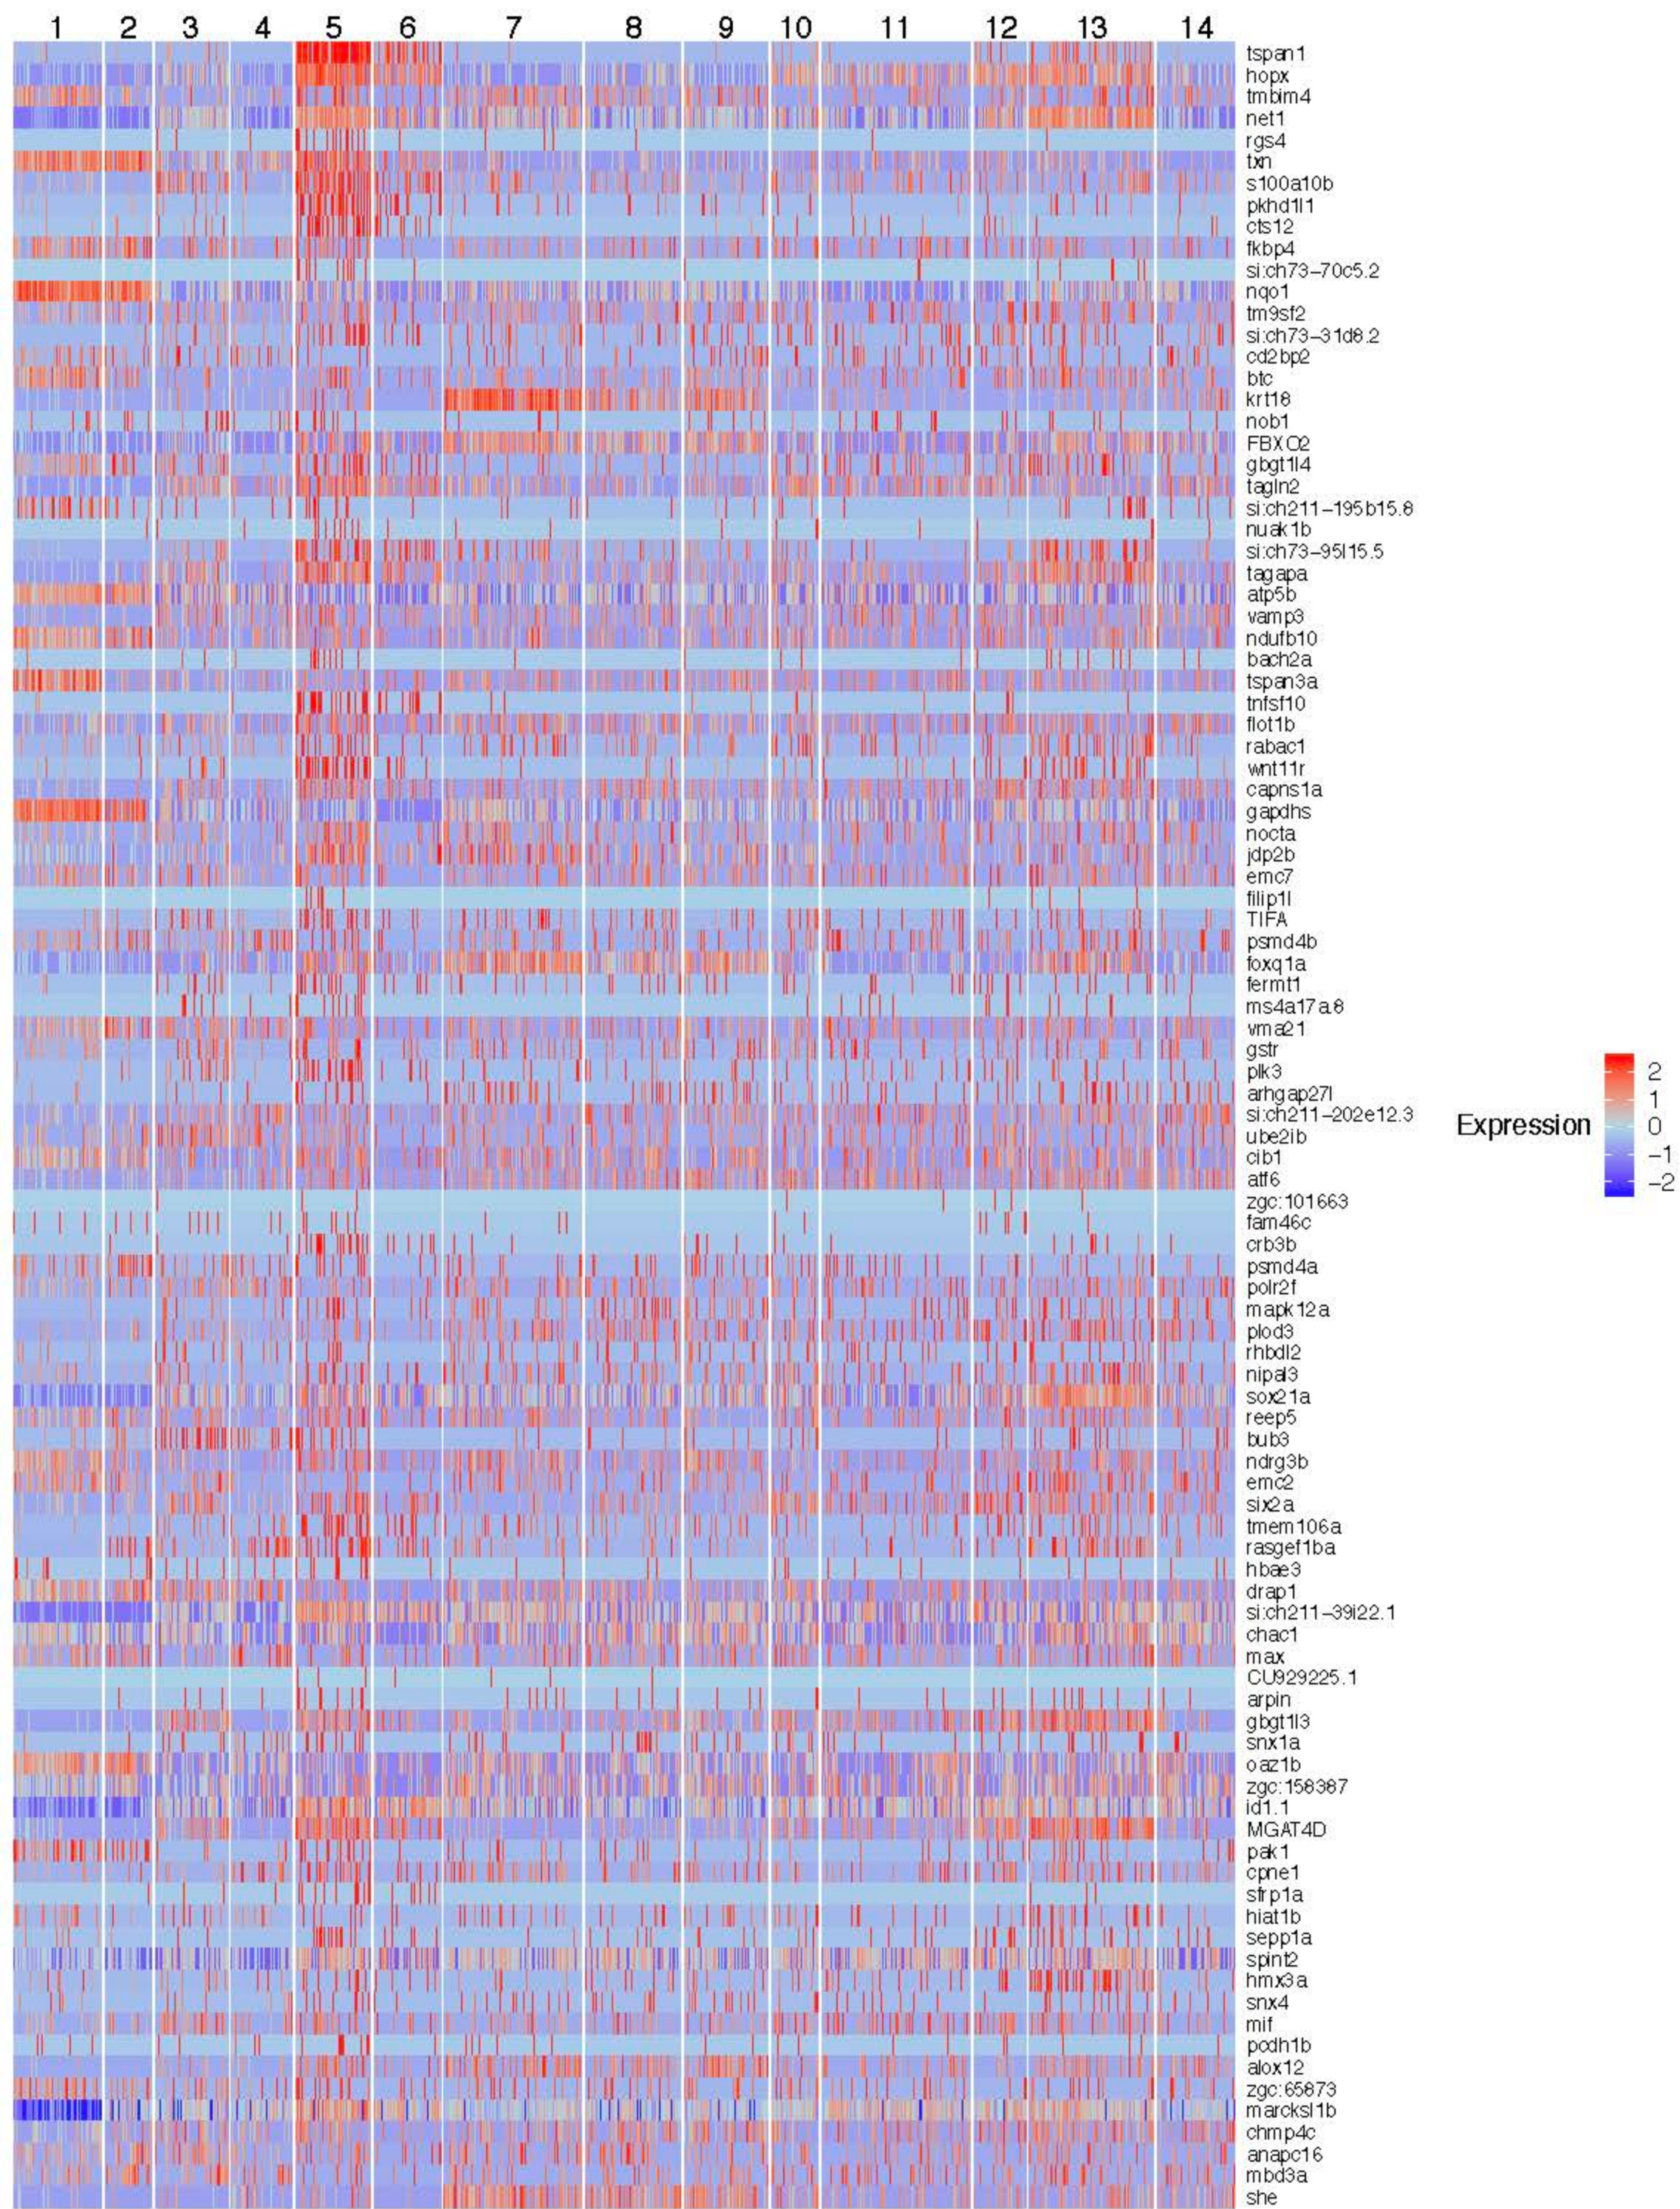

cluster 6 vs cluster 5

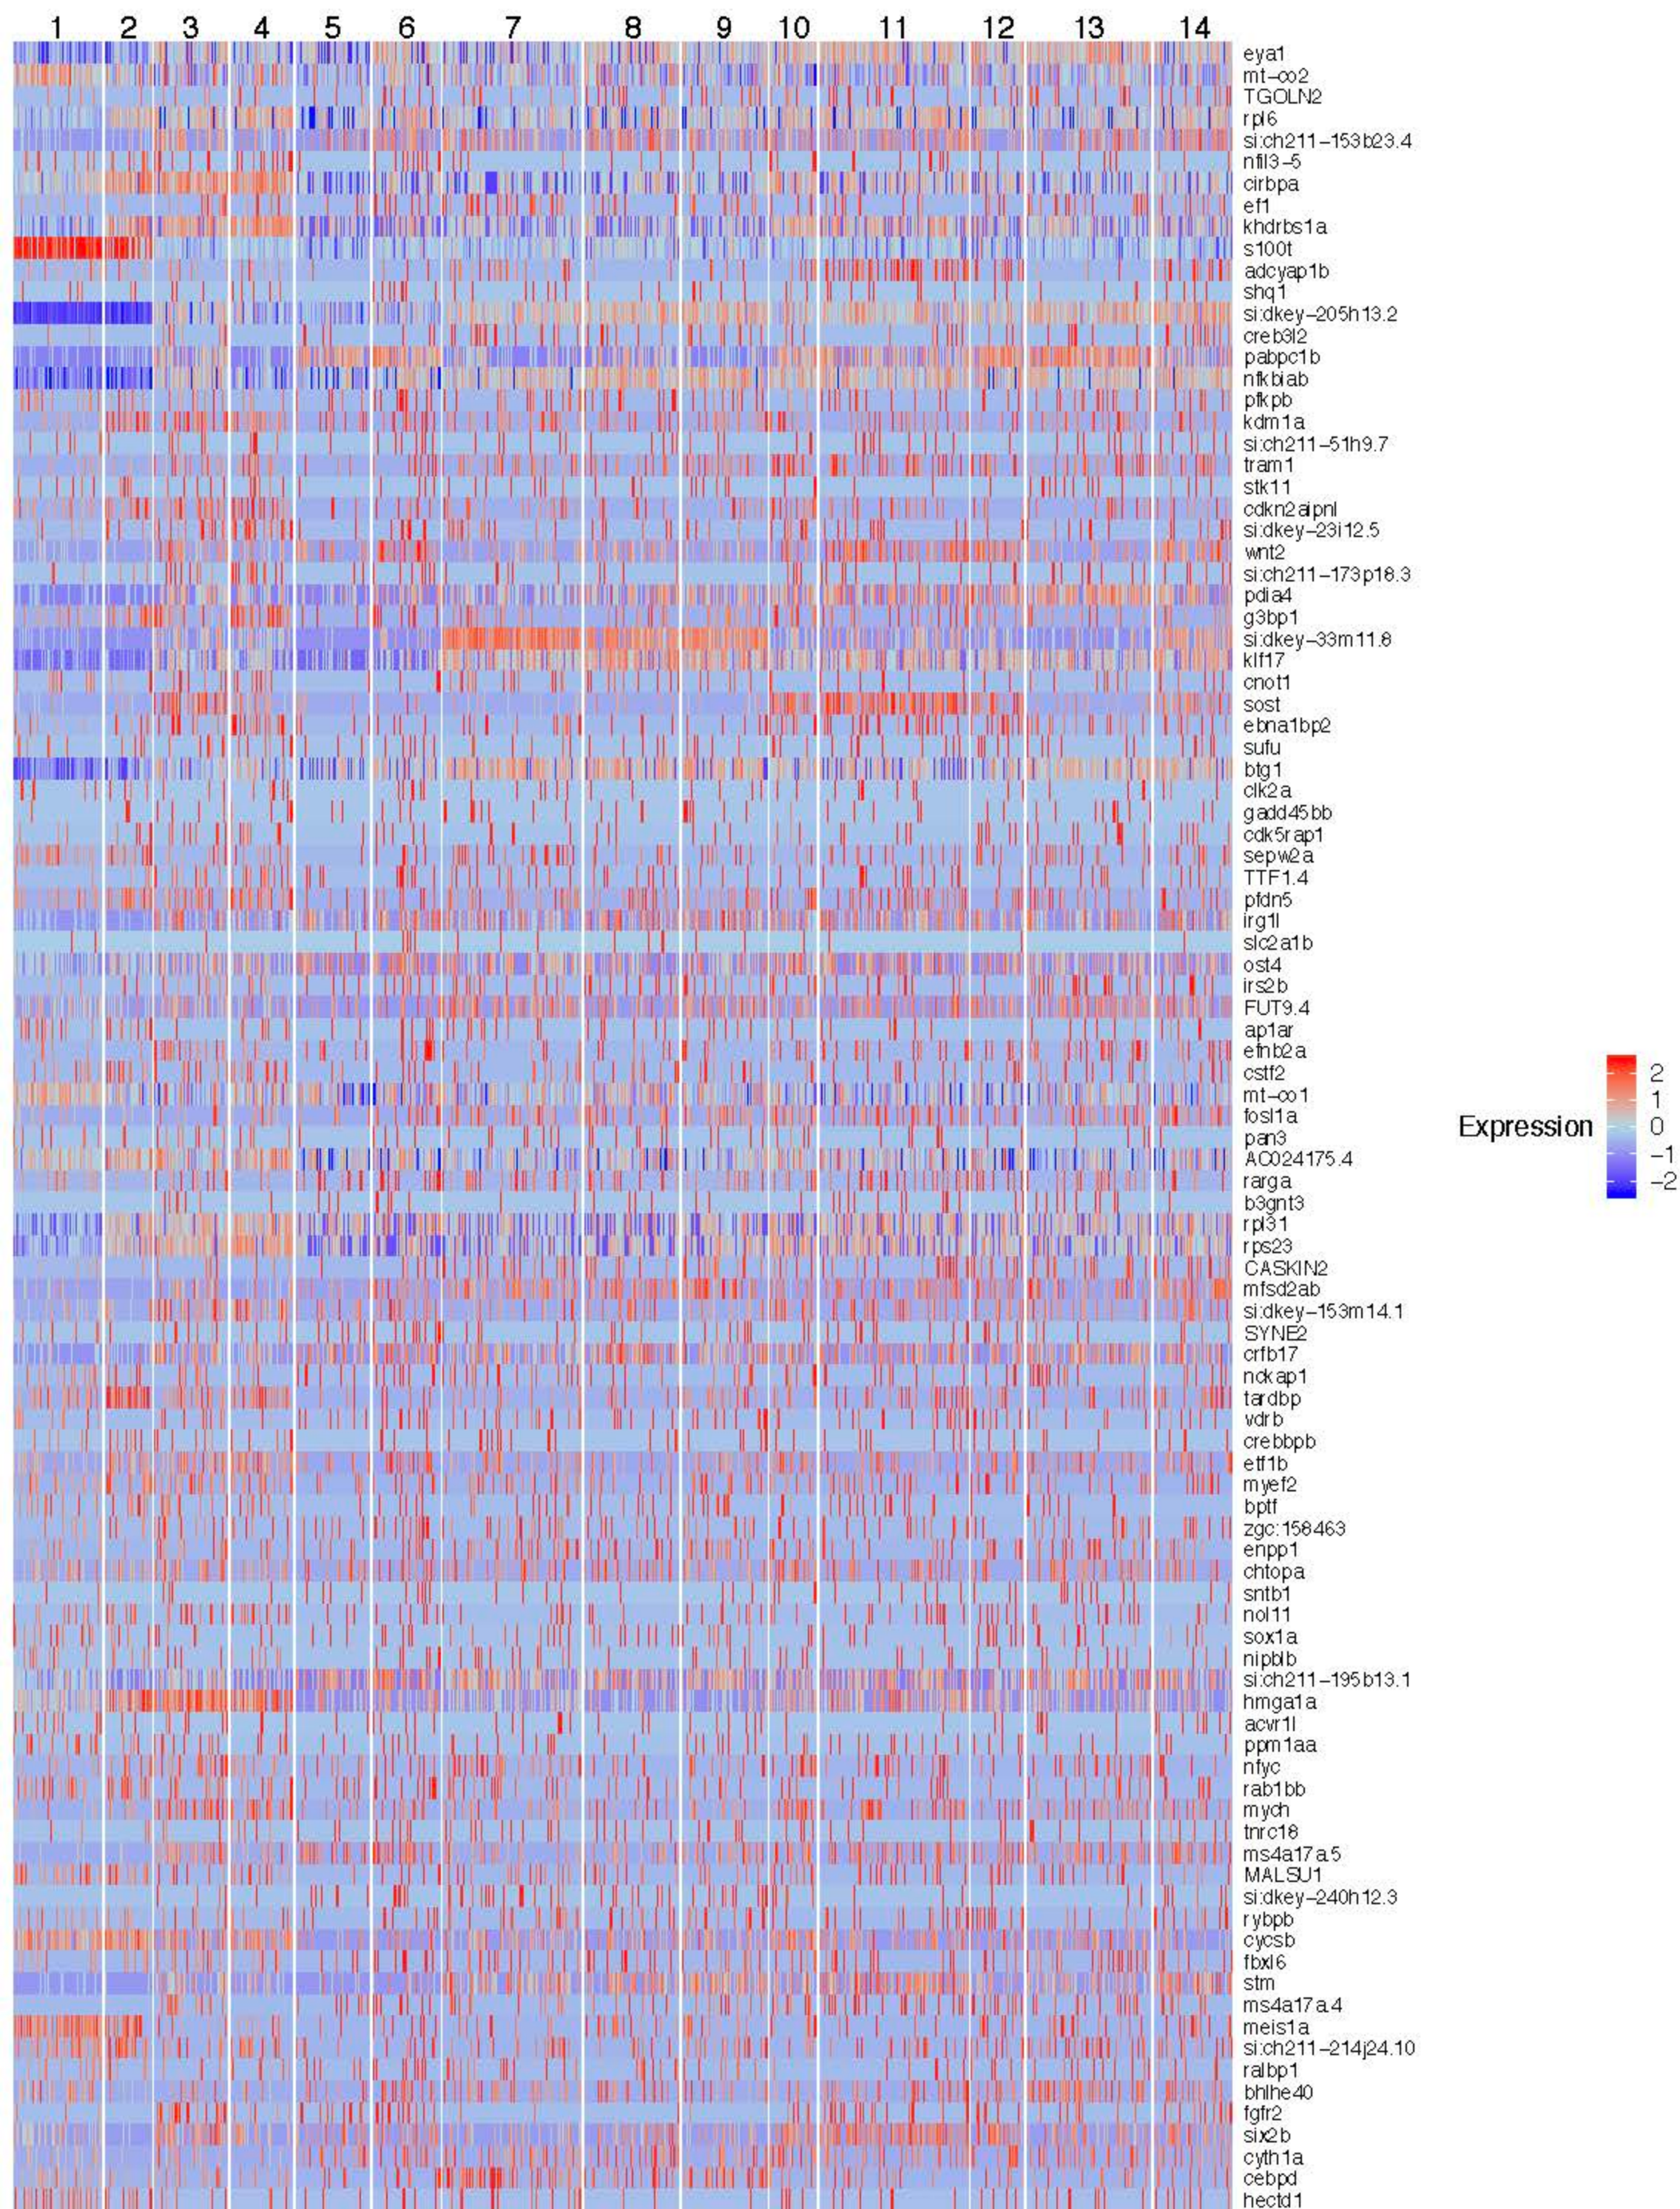

node 20 vs node 21

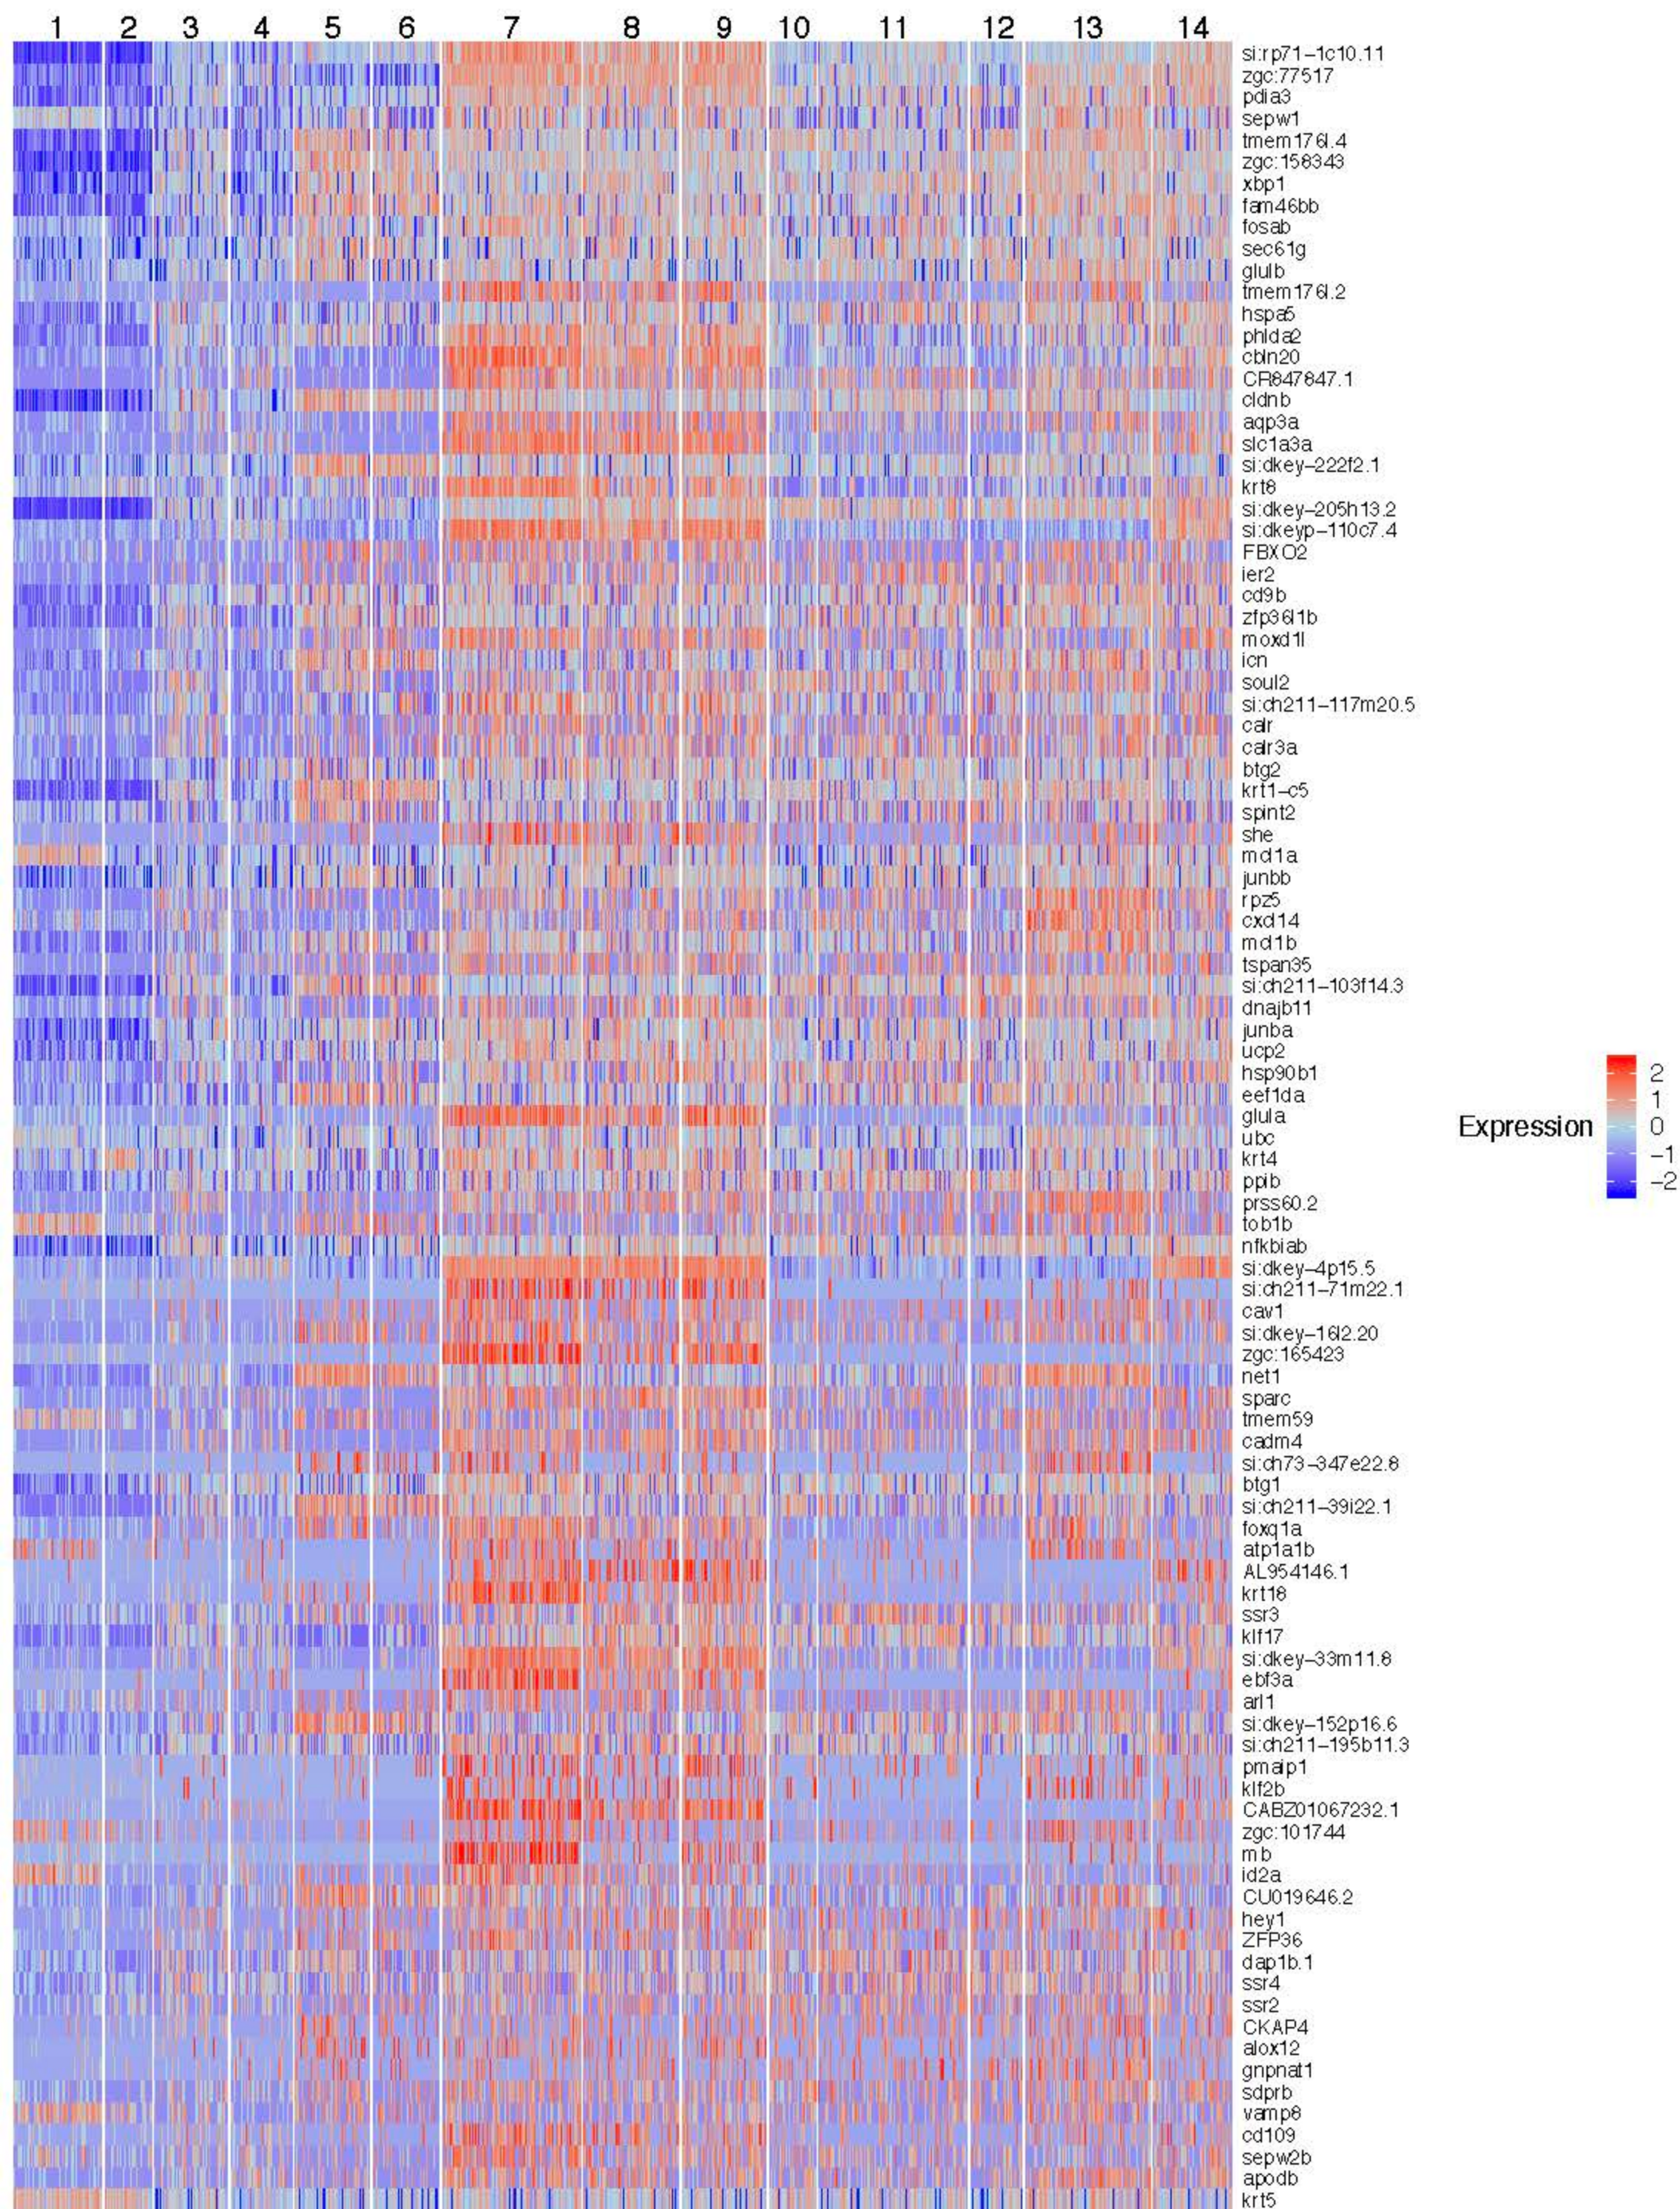

node 21 vs node 20

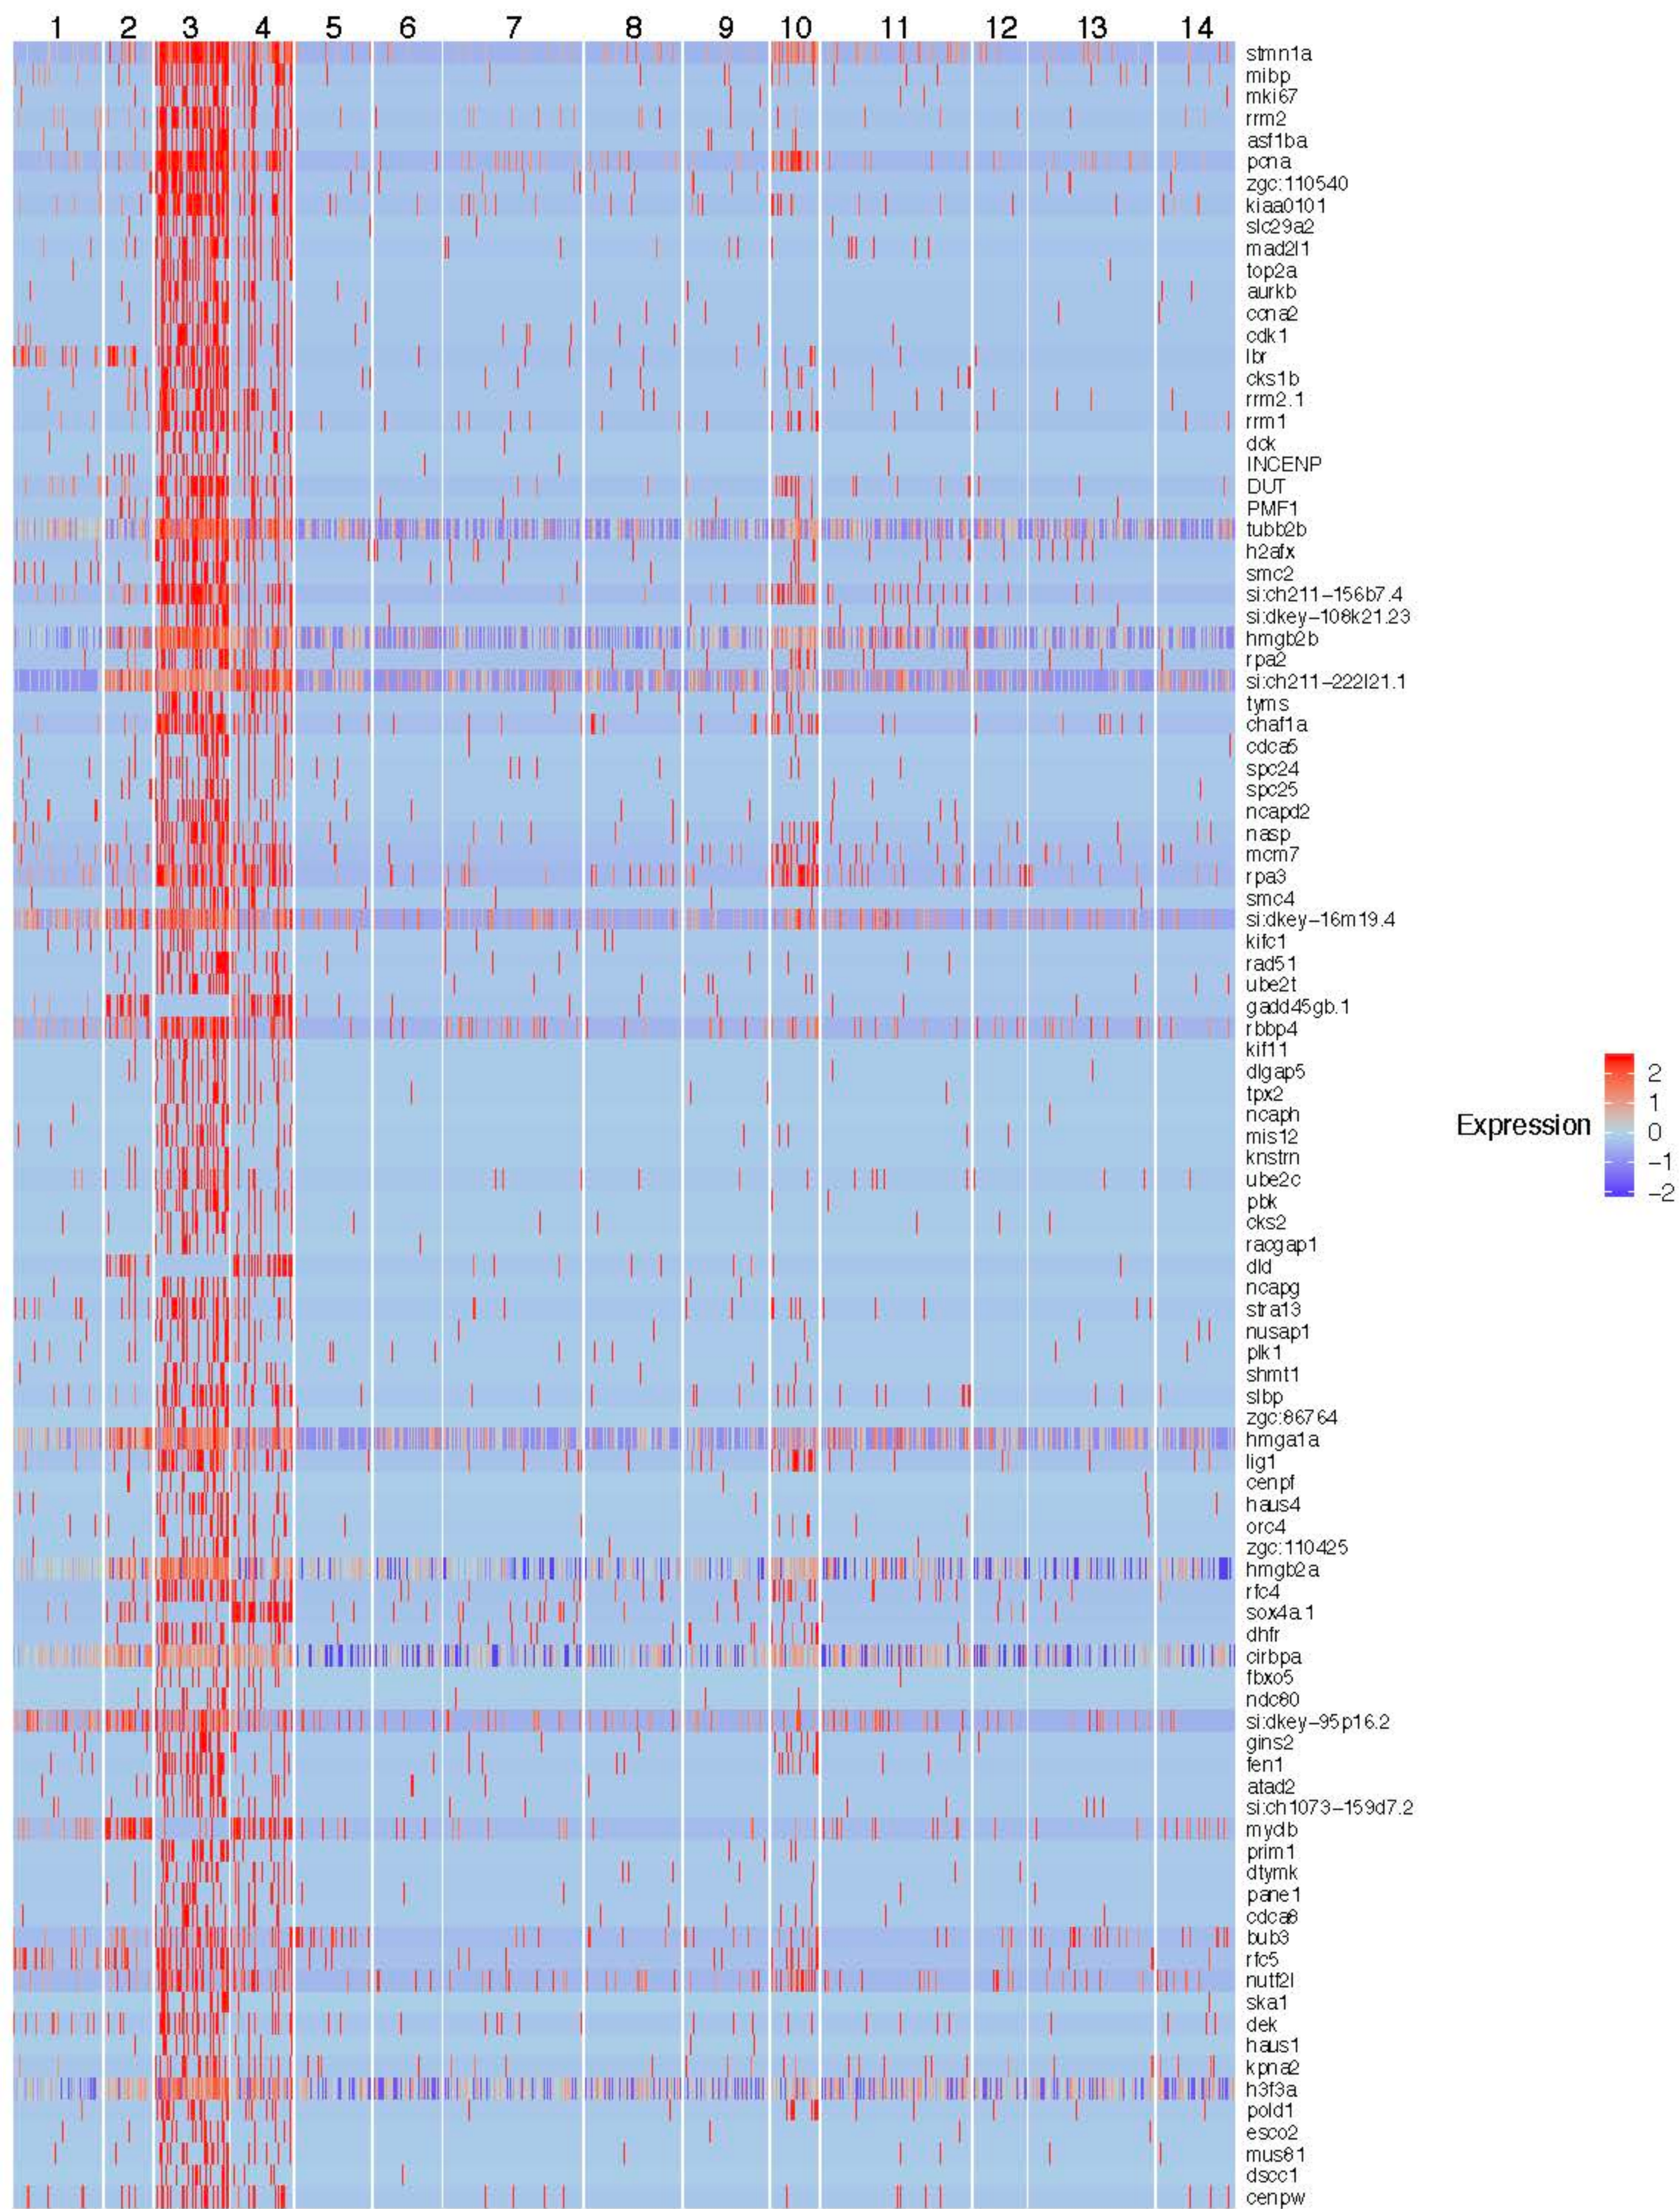

node 22 vs node 23

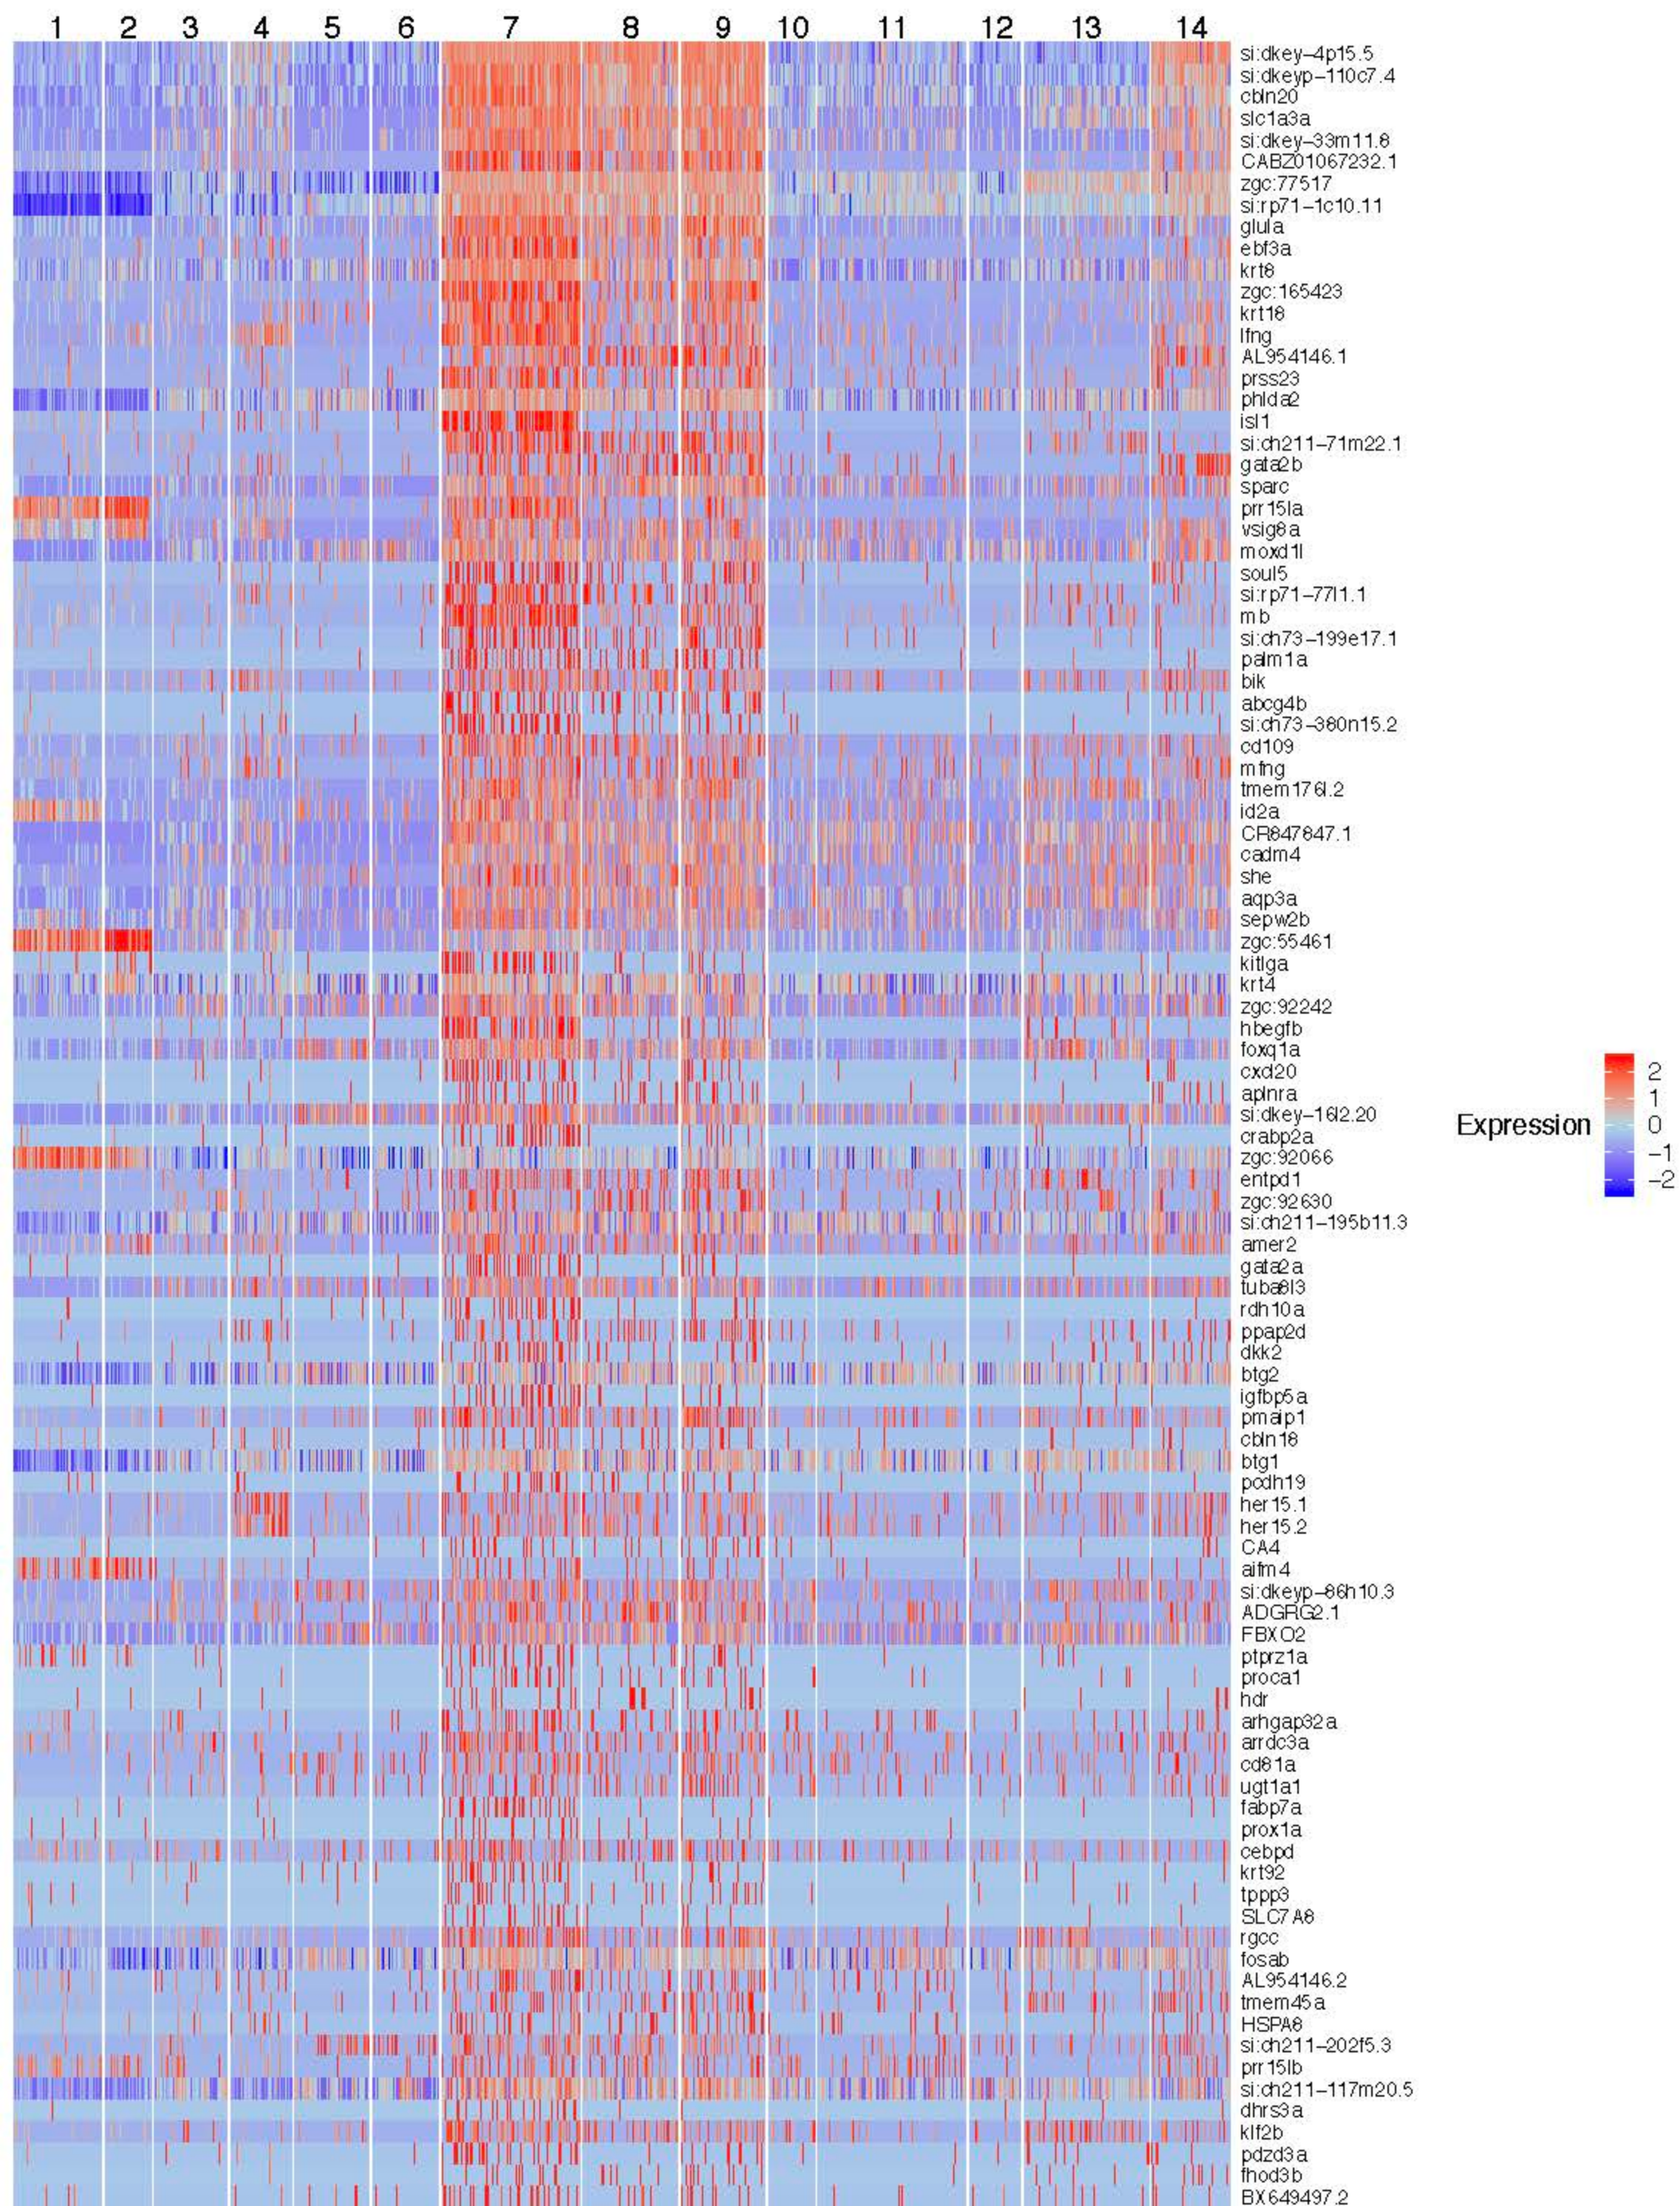

node 23 vs node 22

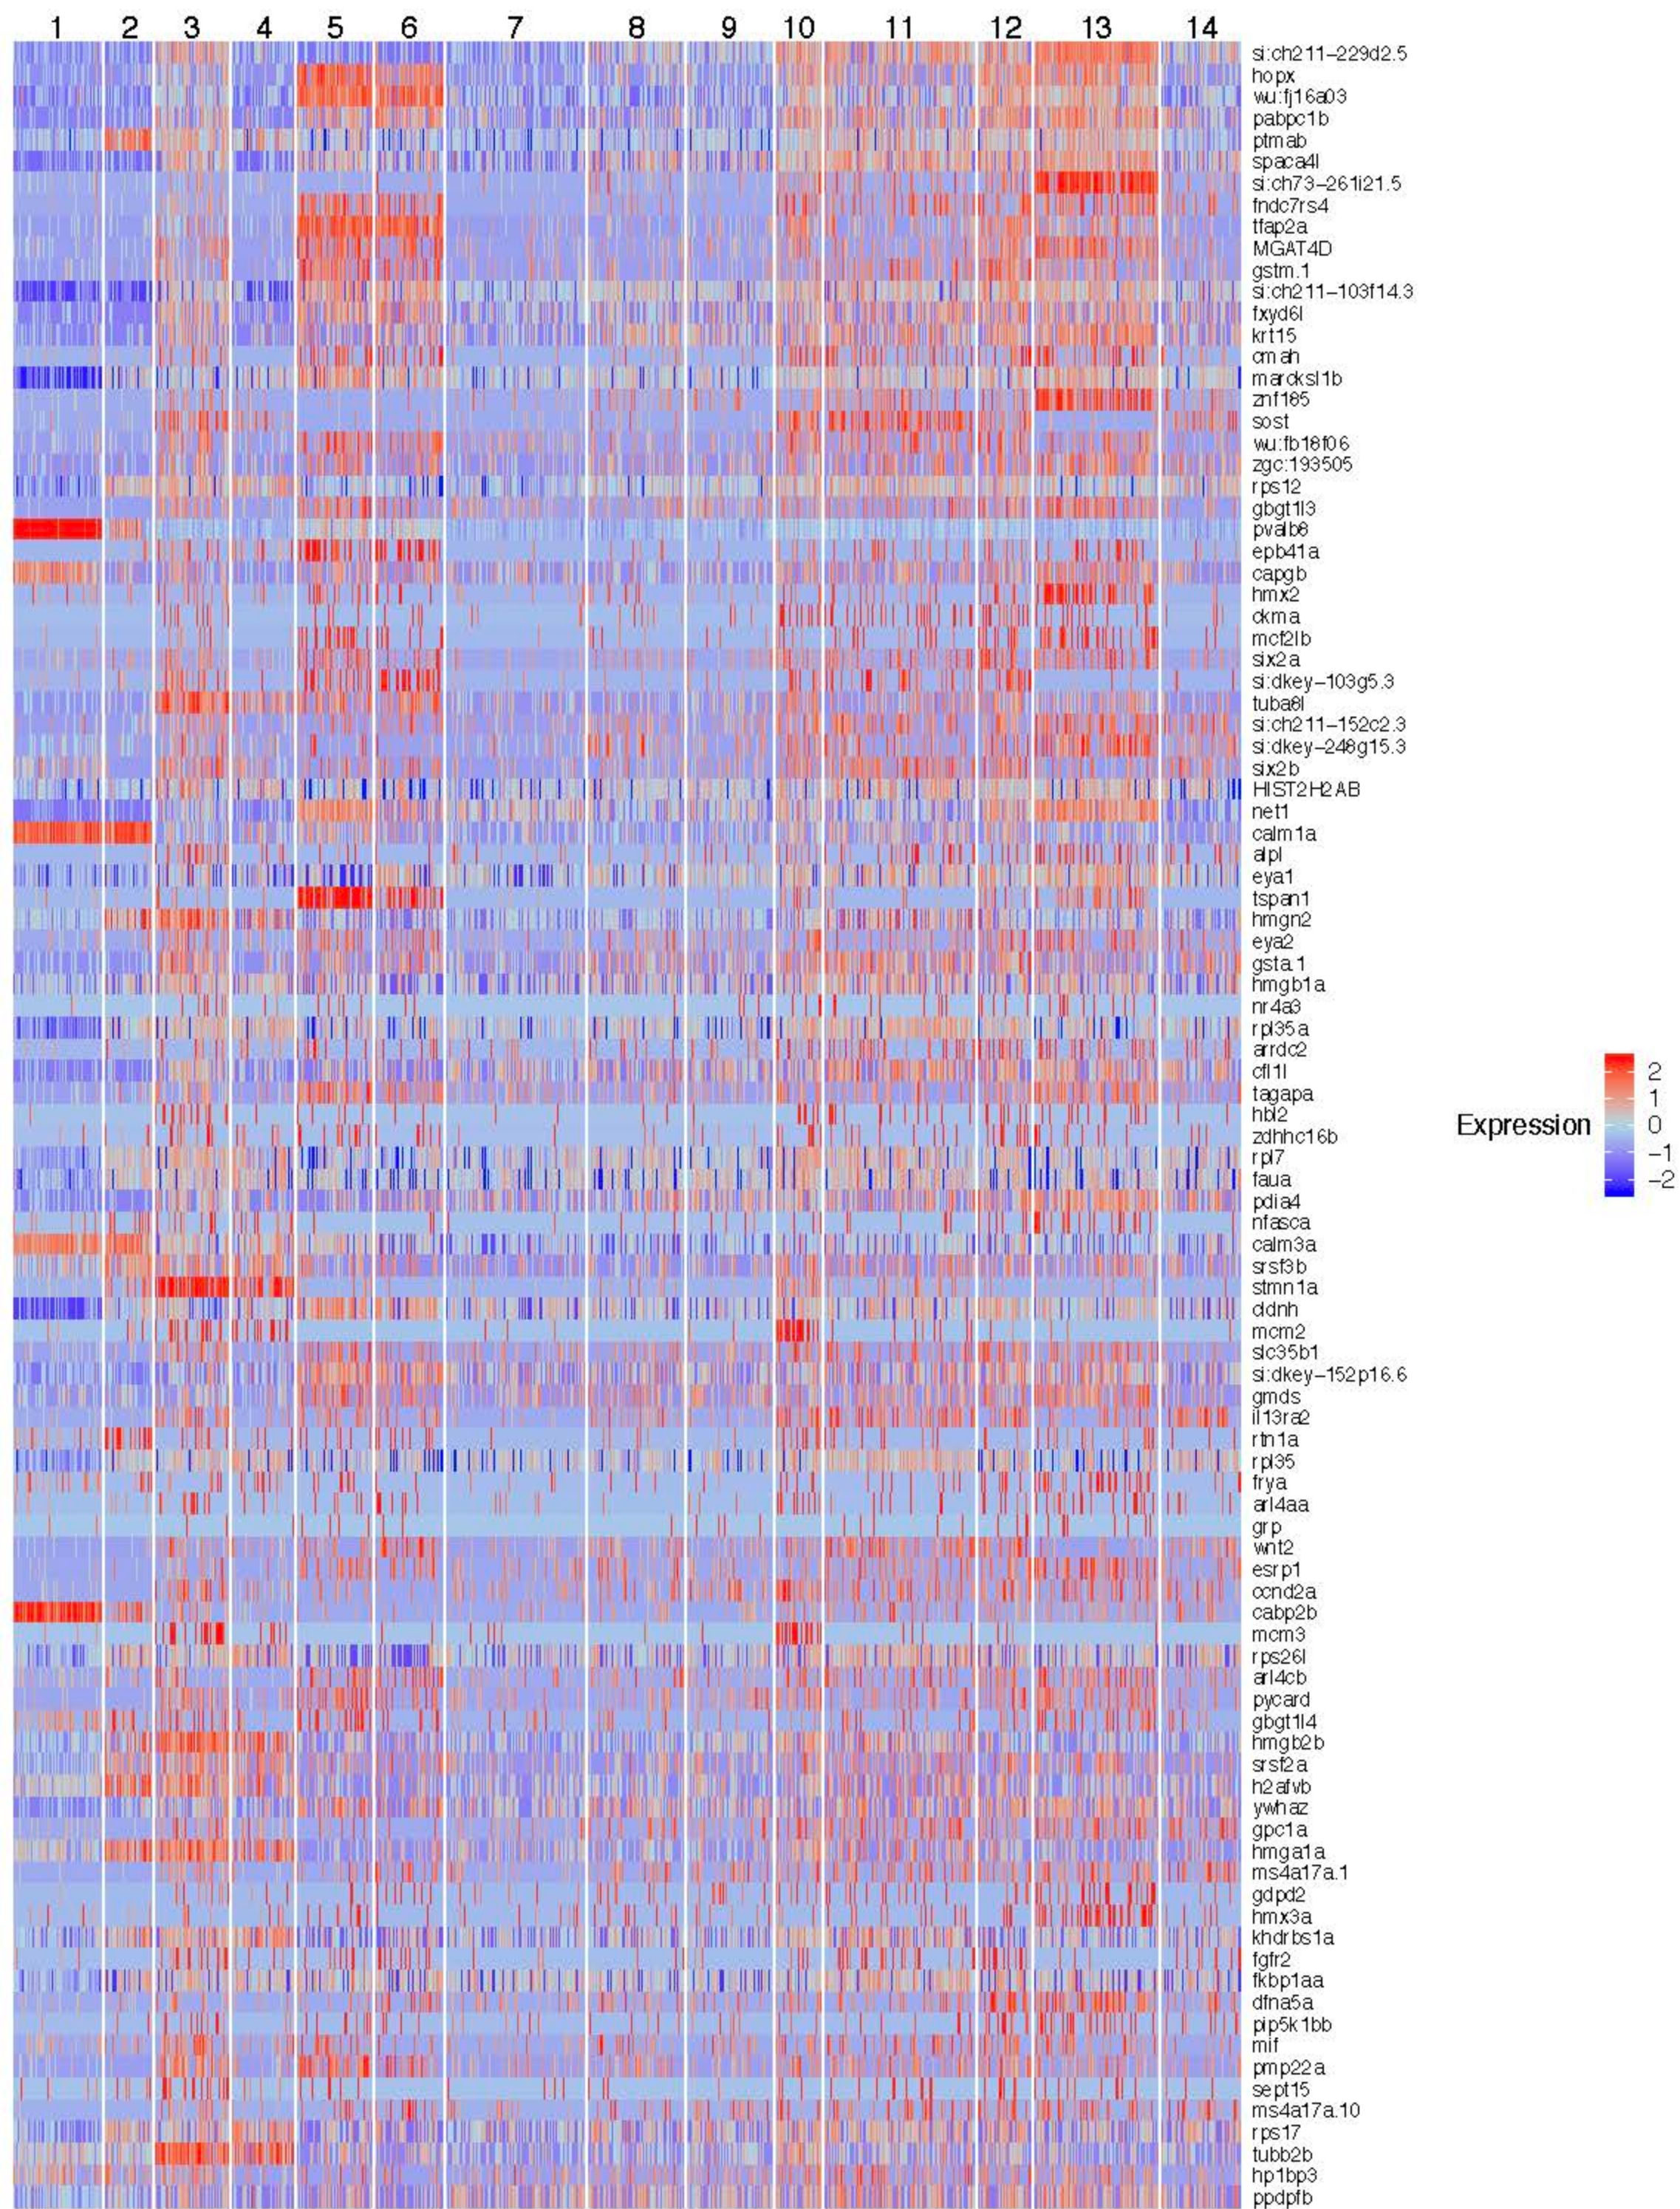

cluster 3 vs cluster 4

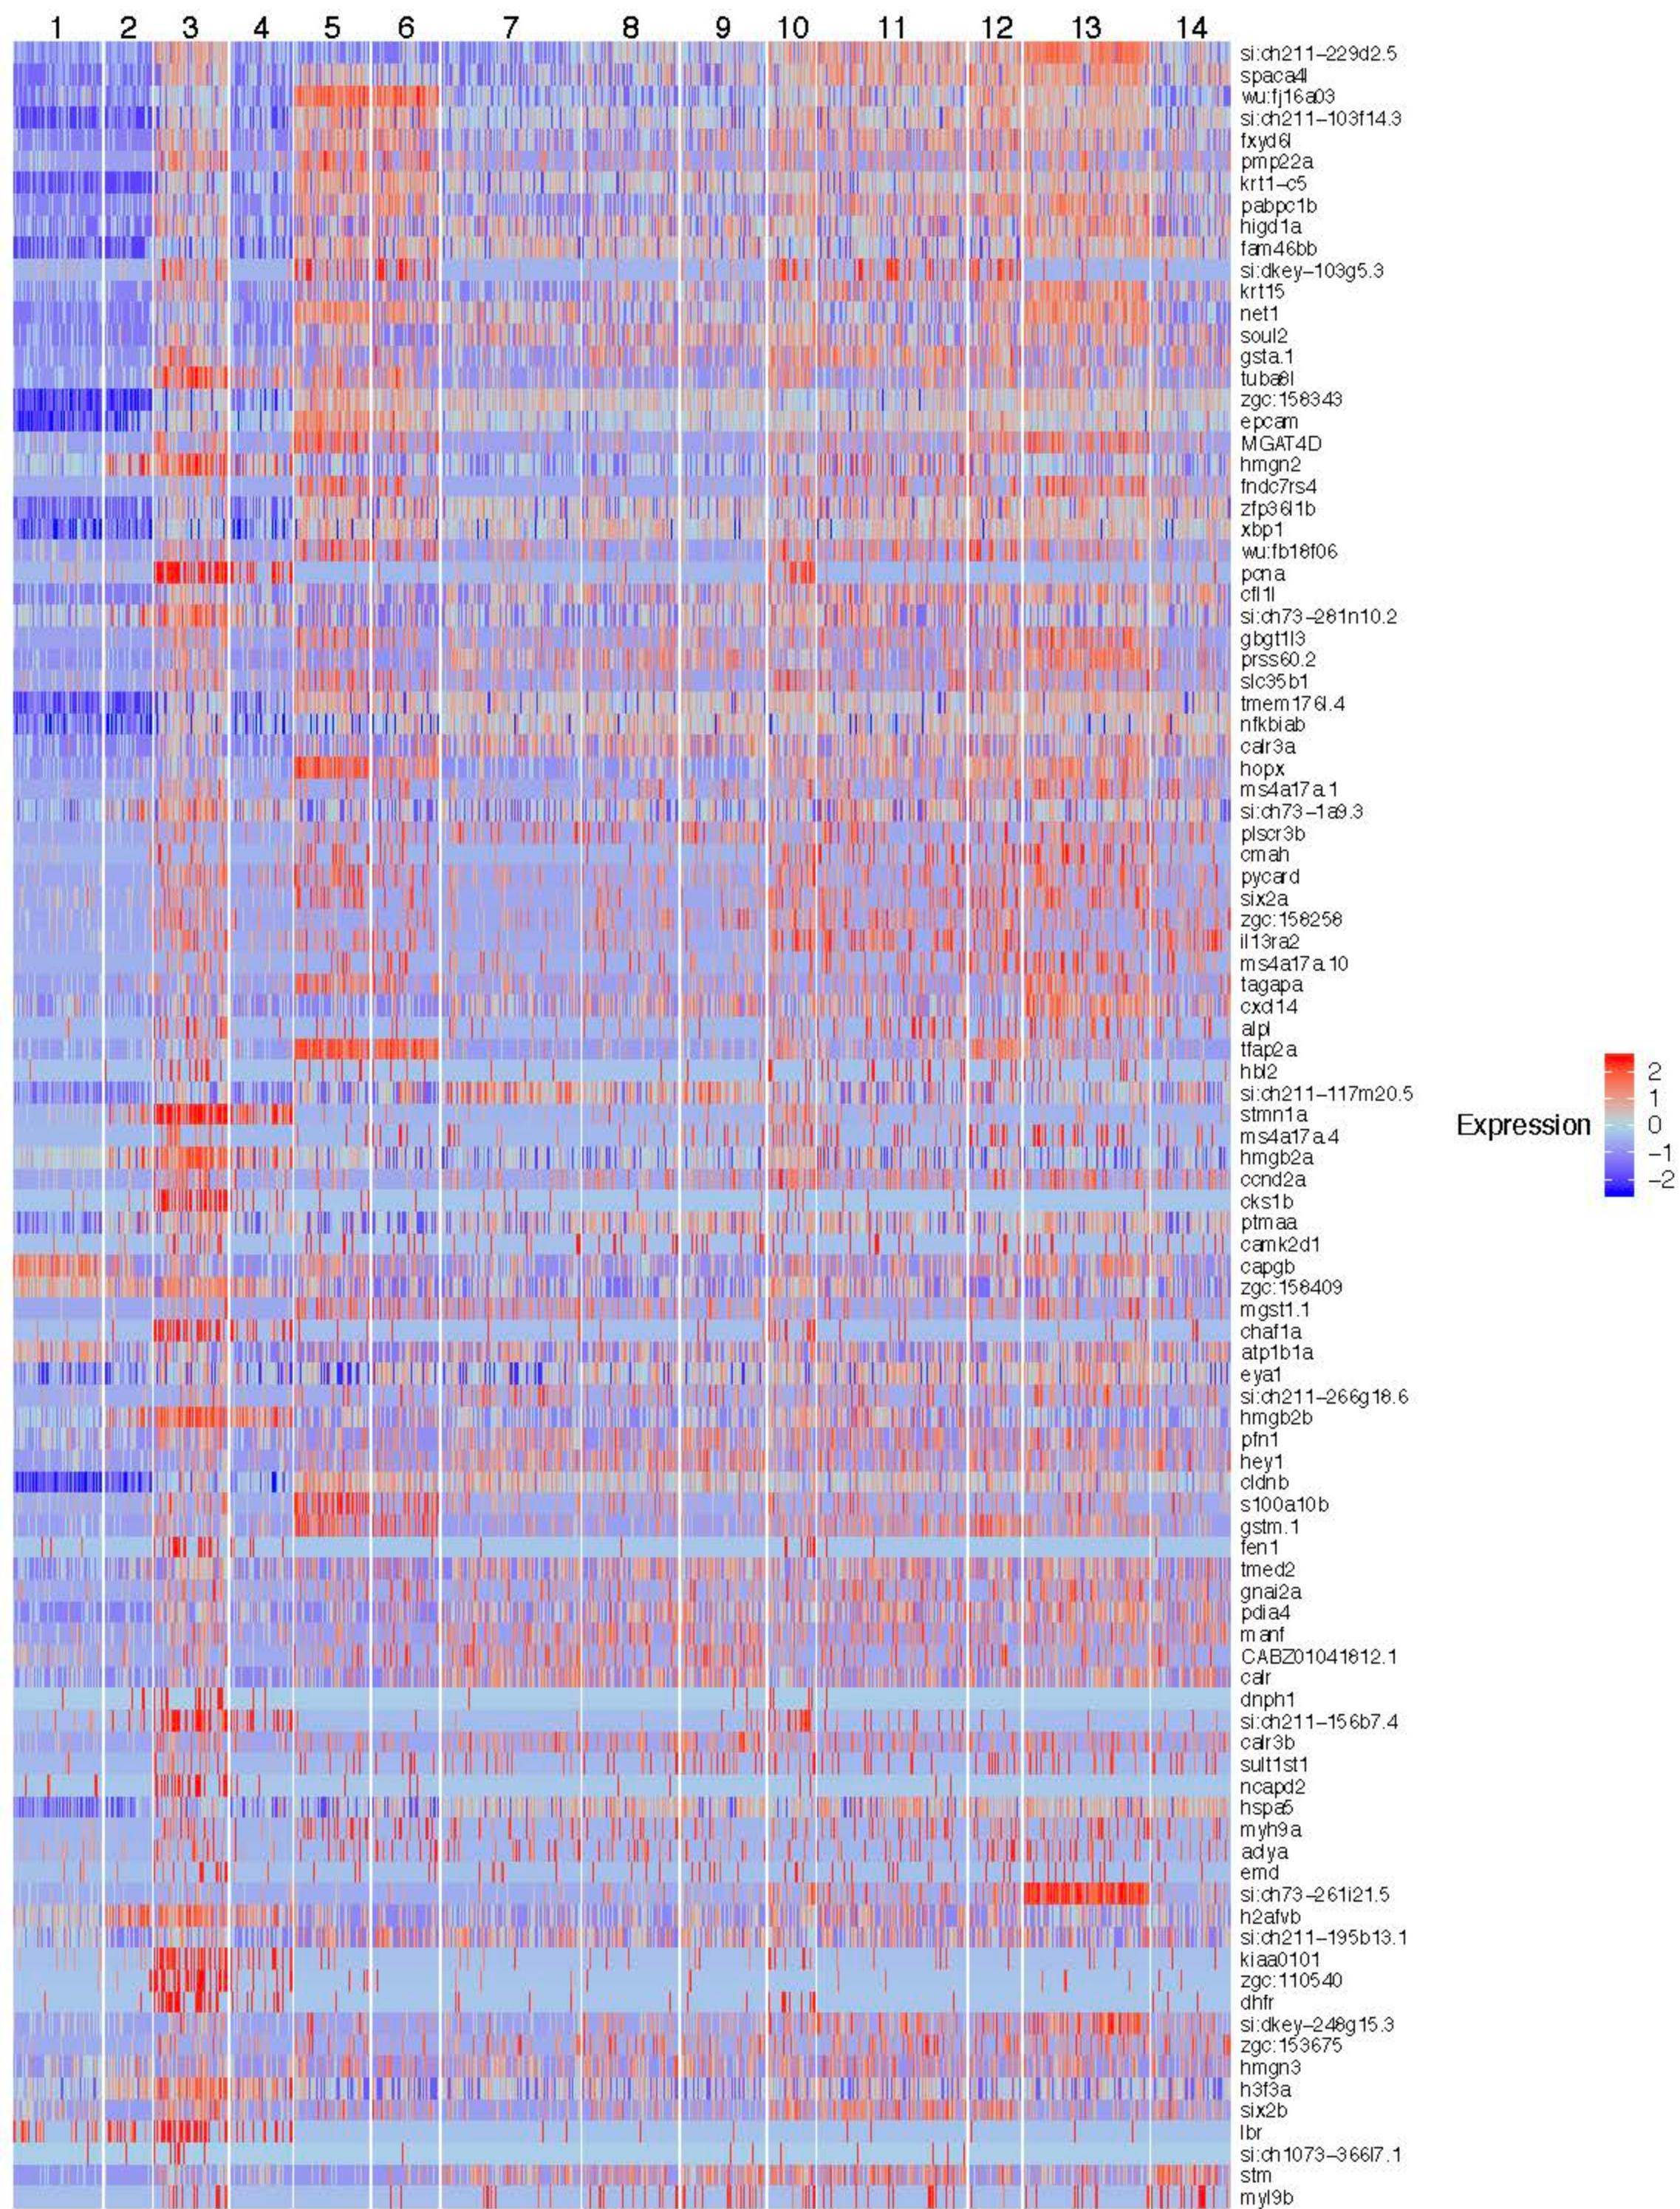

cluster 4 vs cluster 3

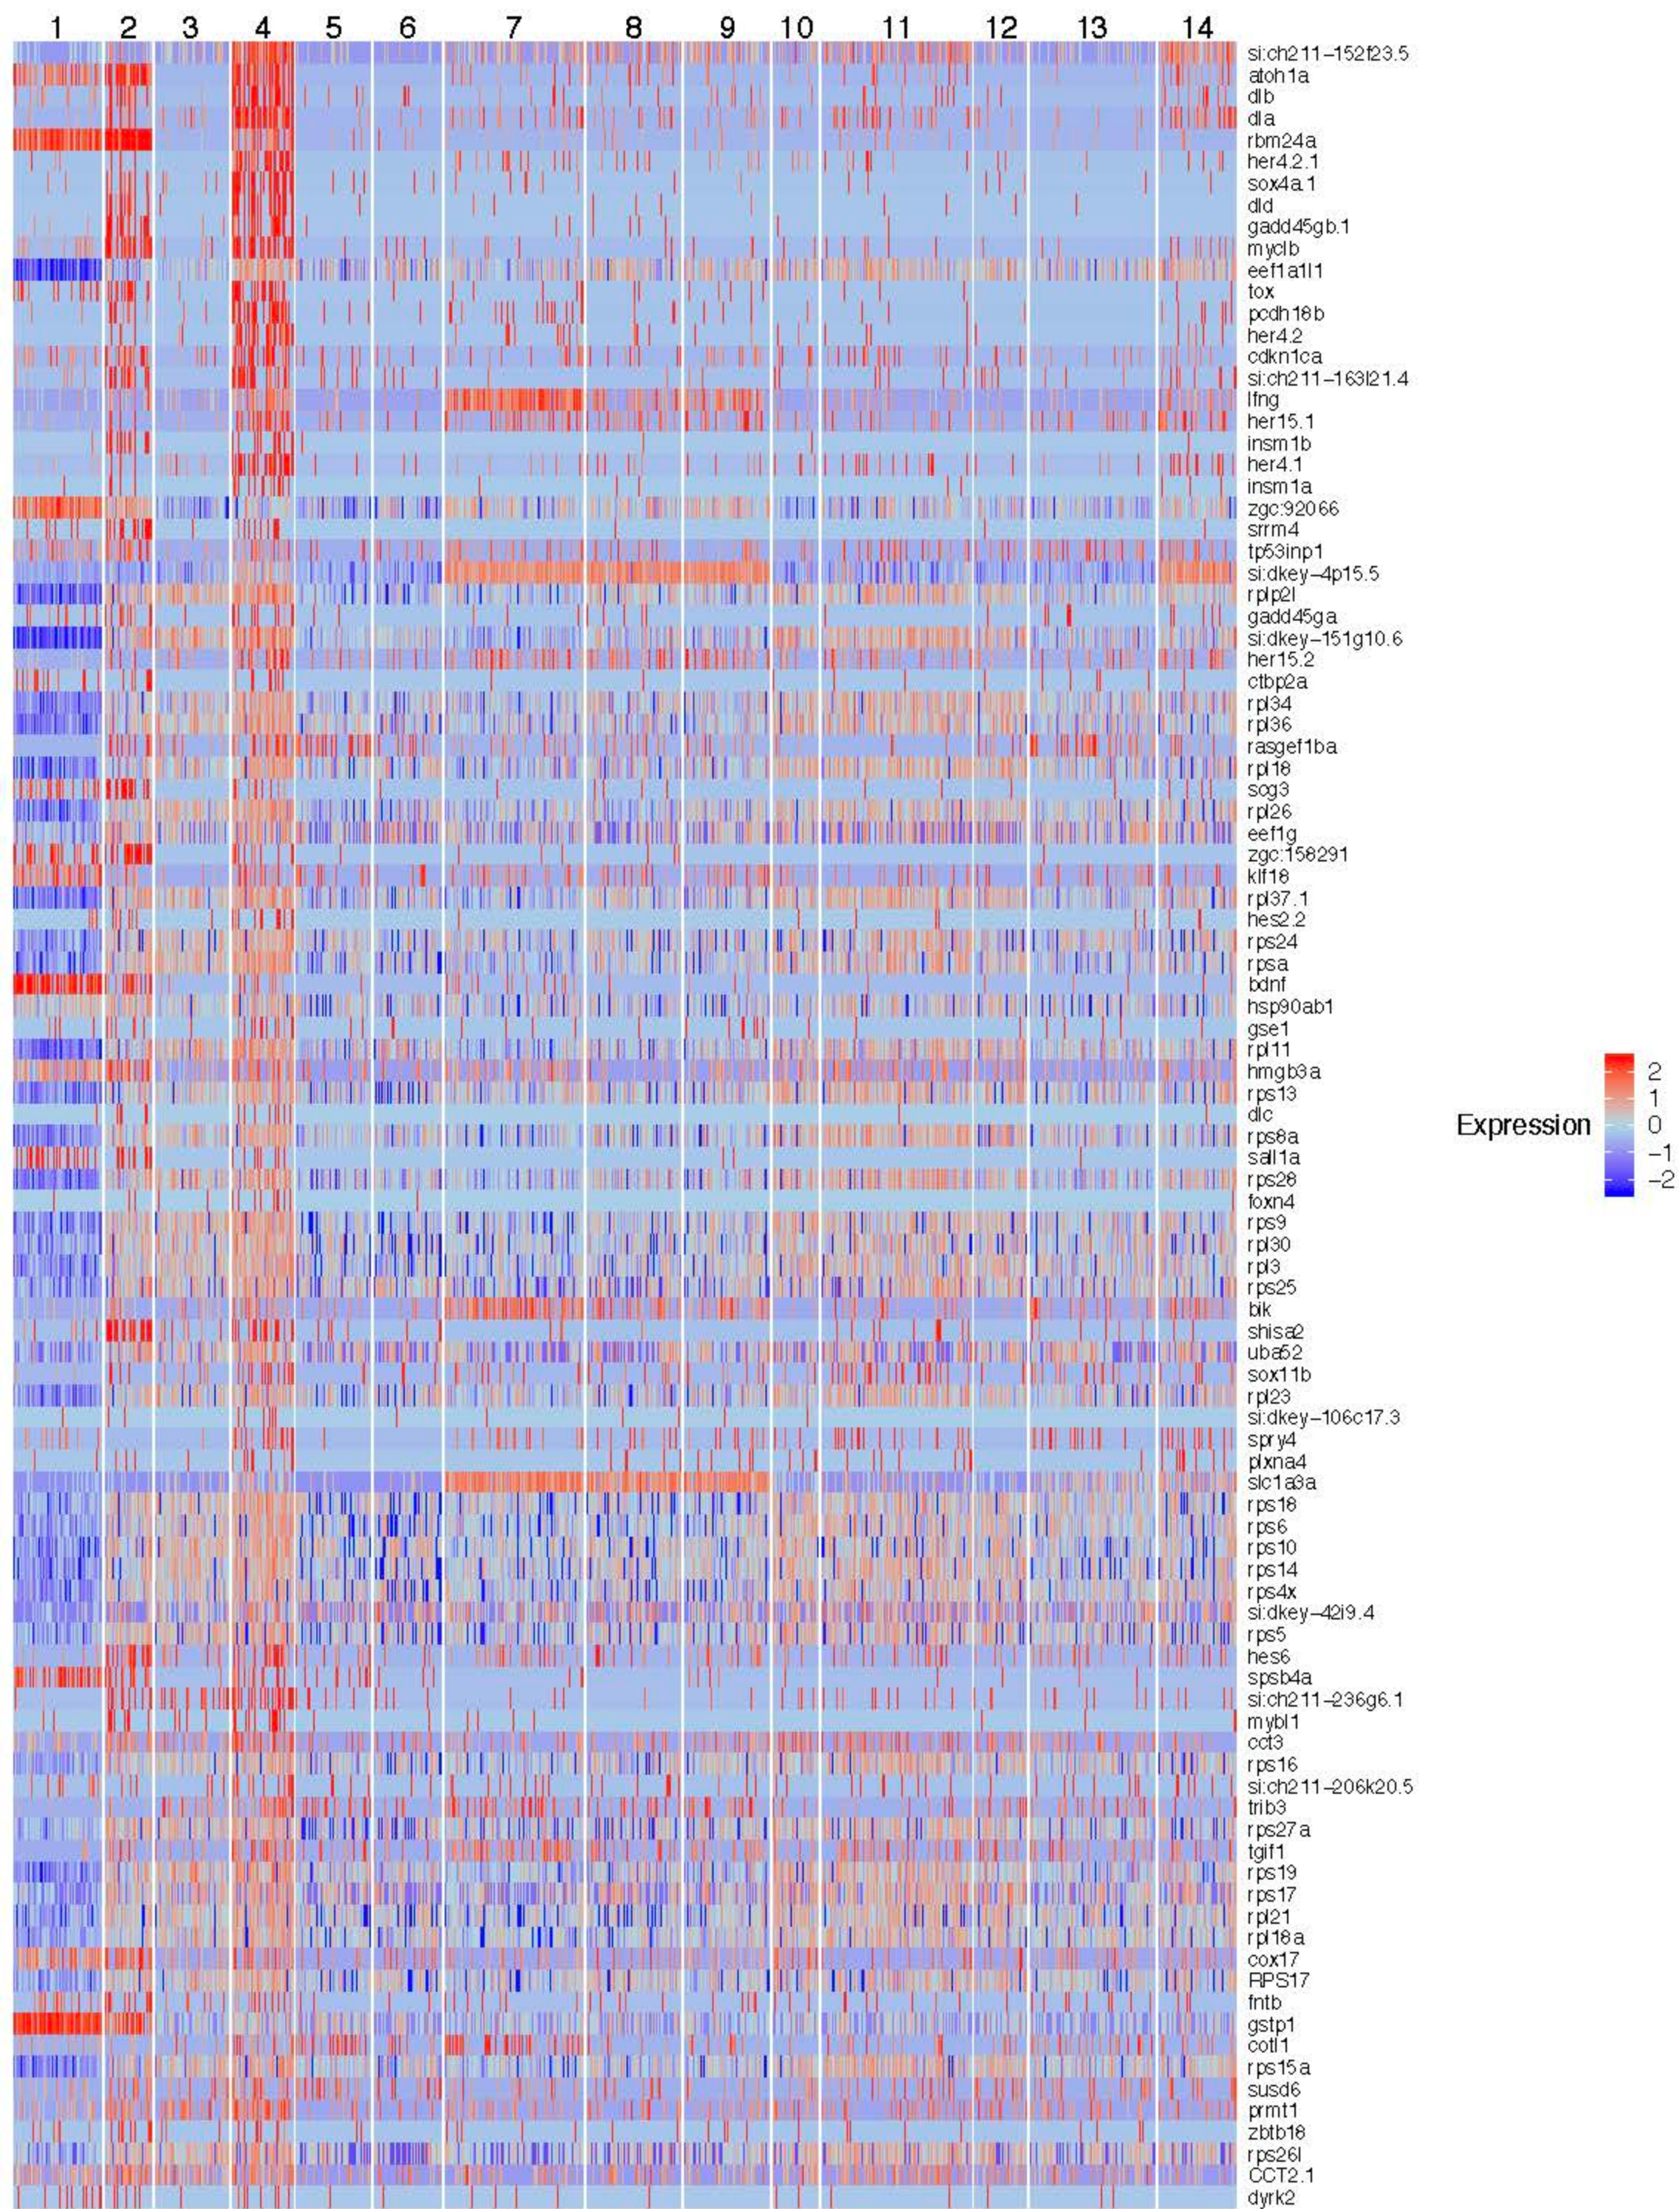

cluster 7 vs node 25

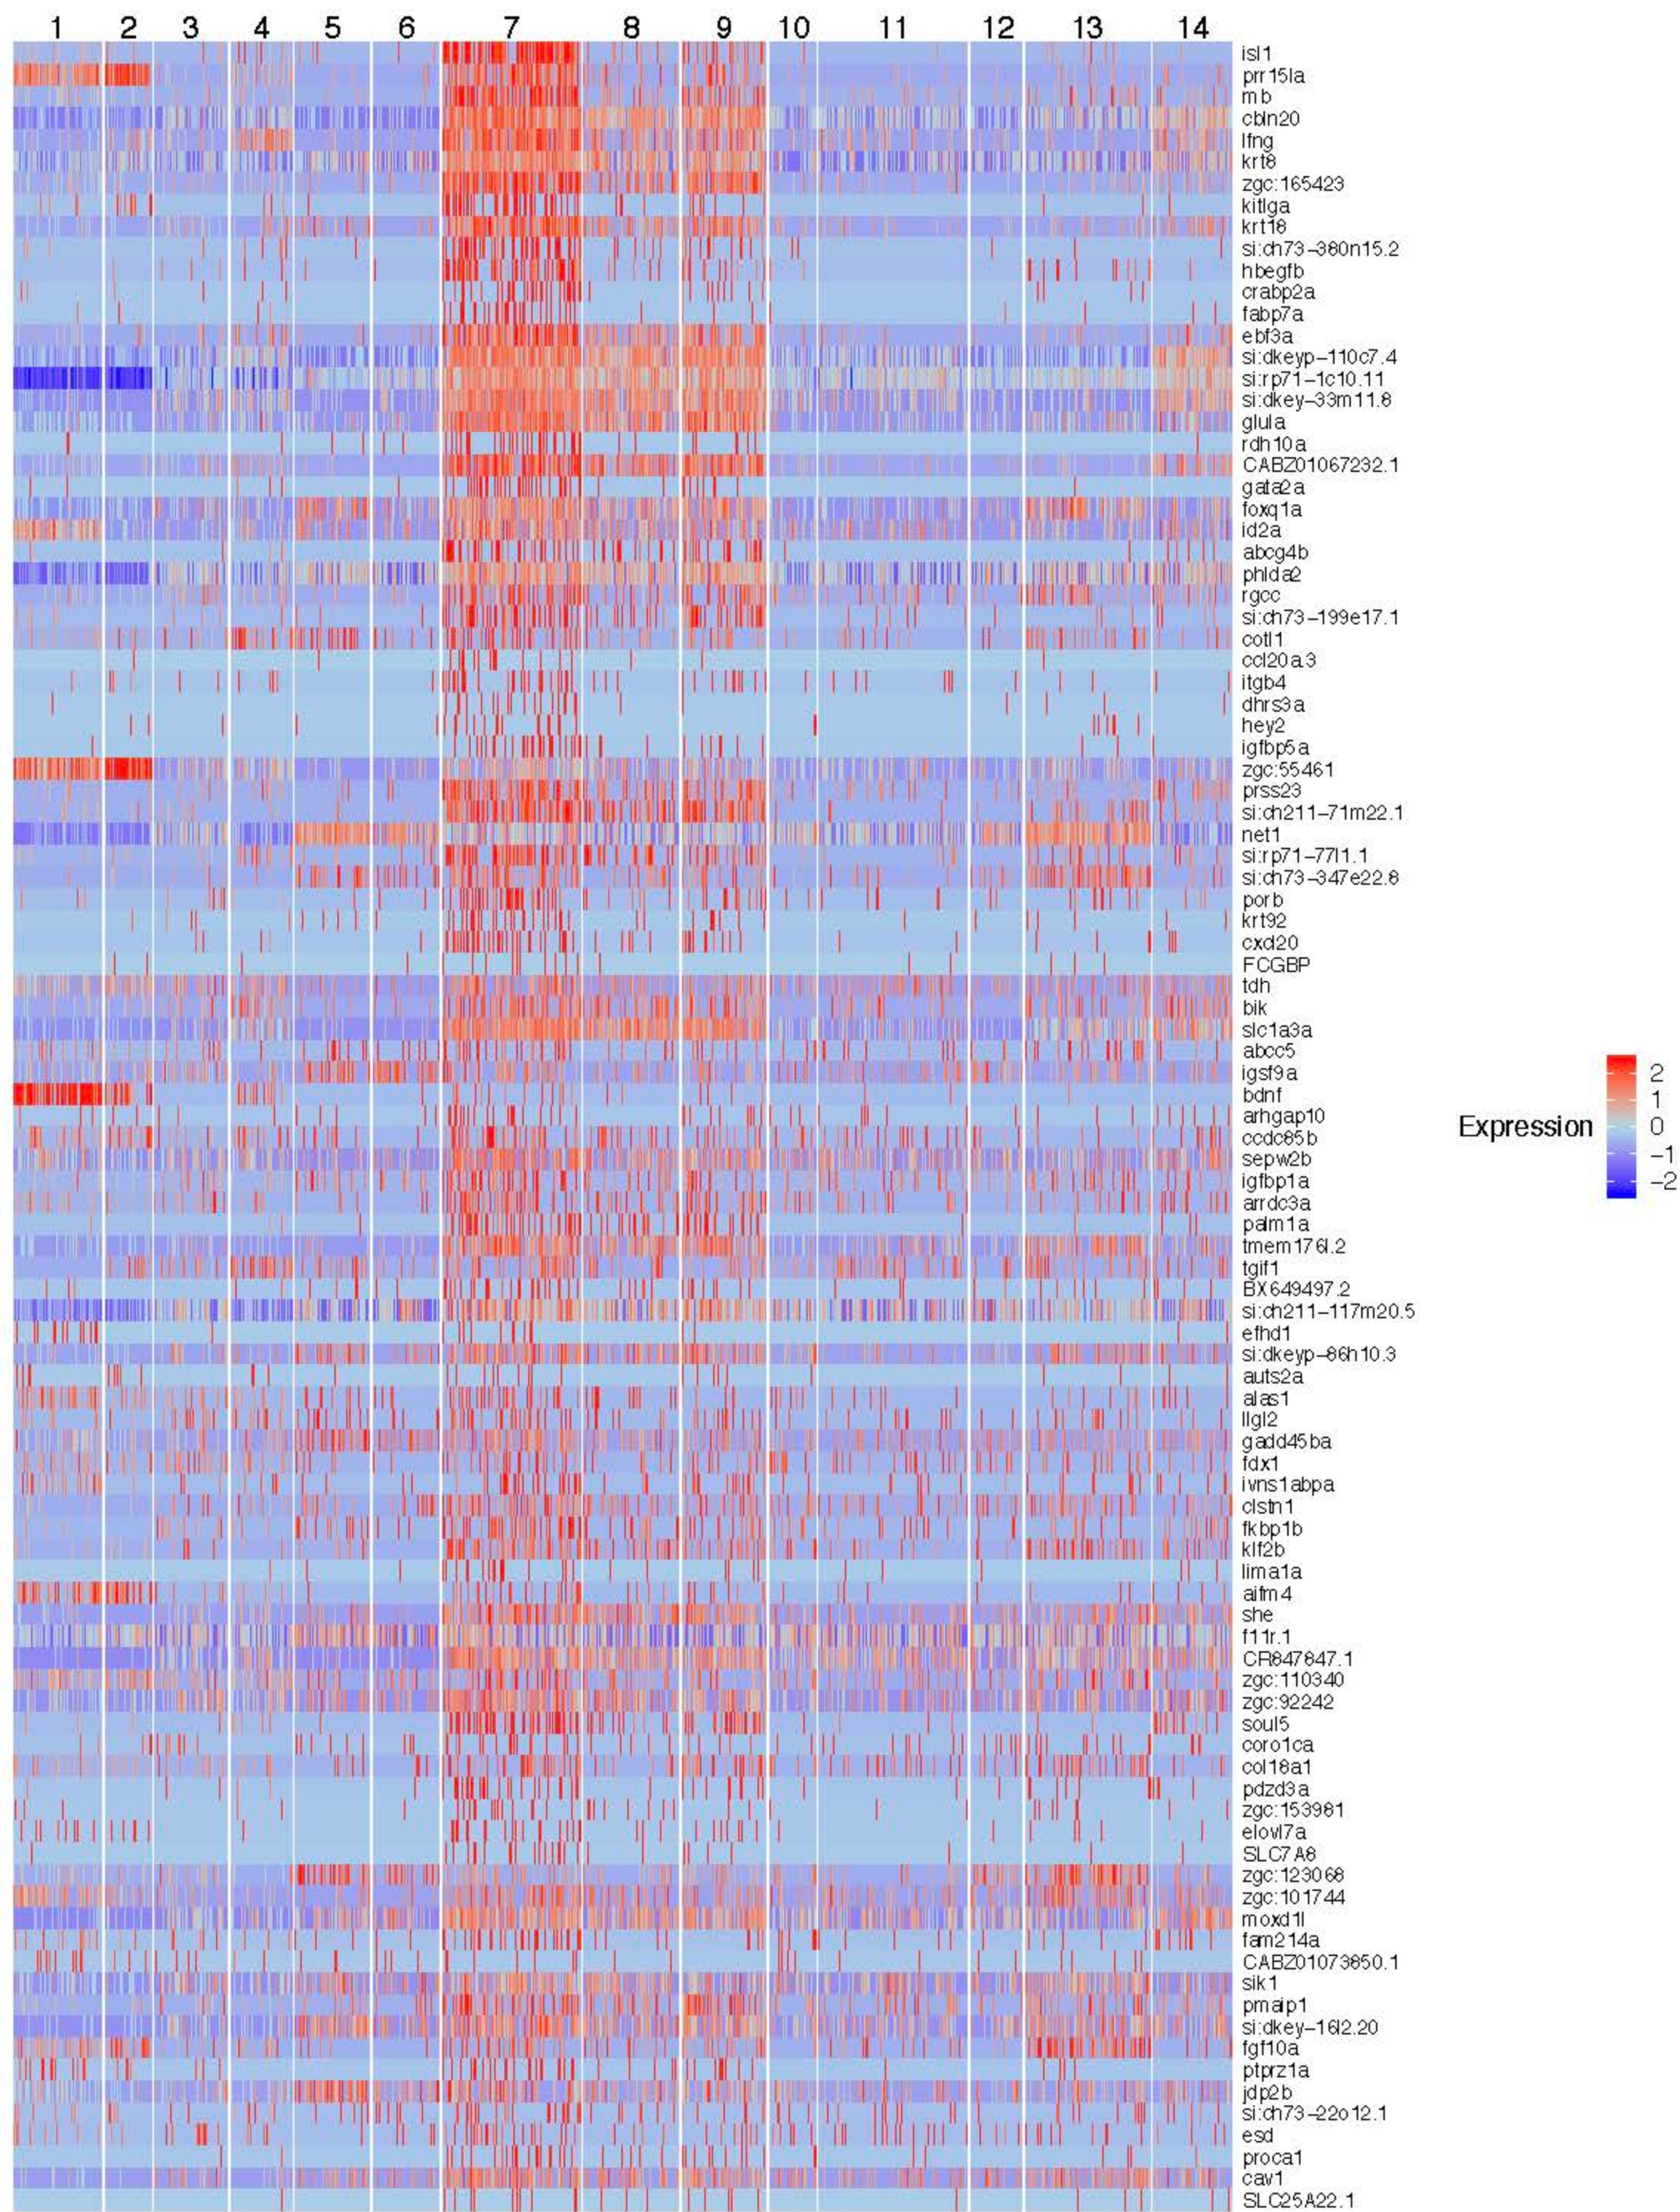

node 25 vs cluster 7

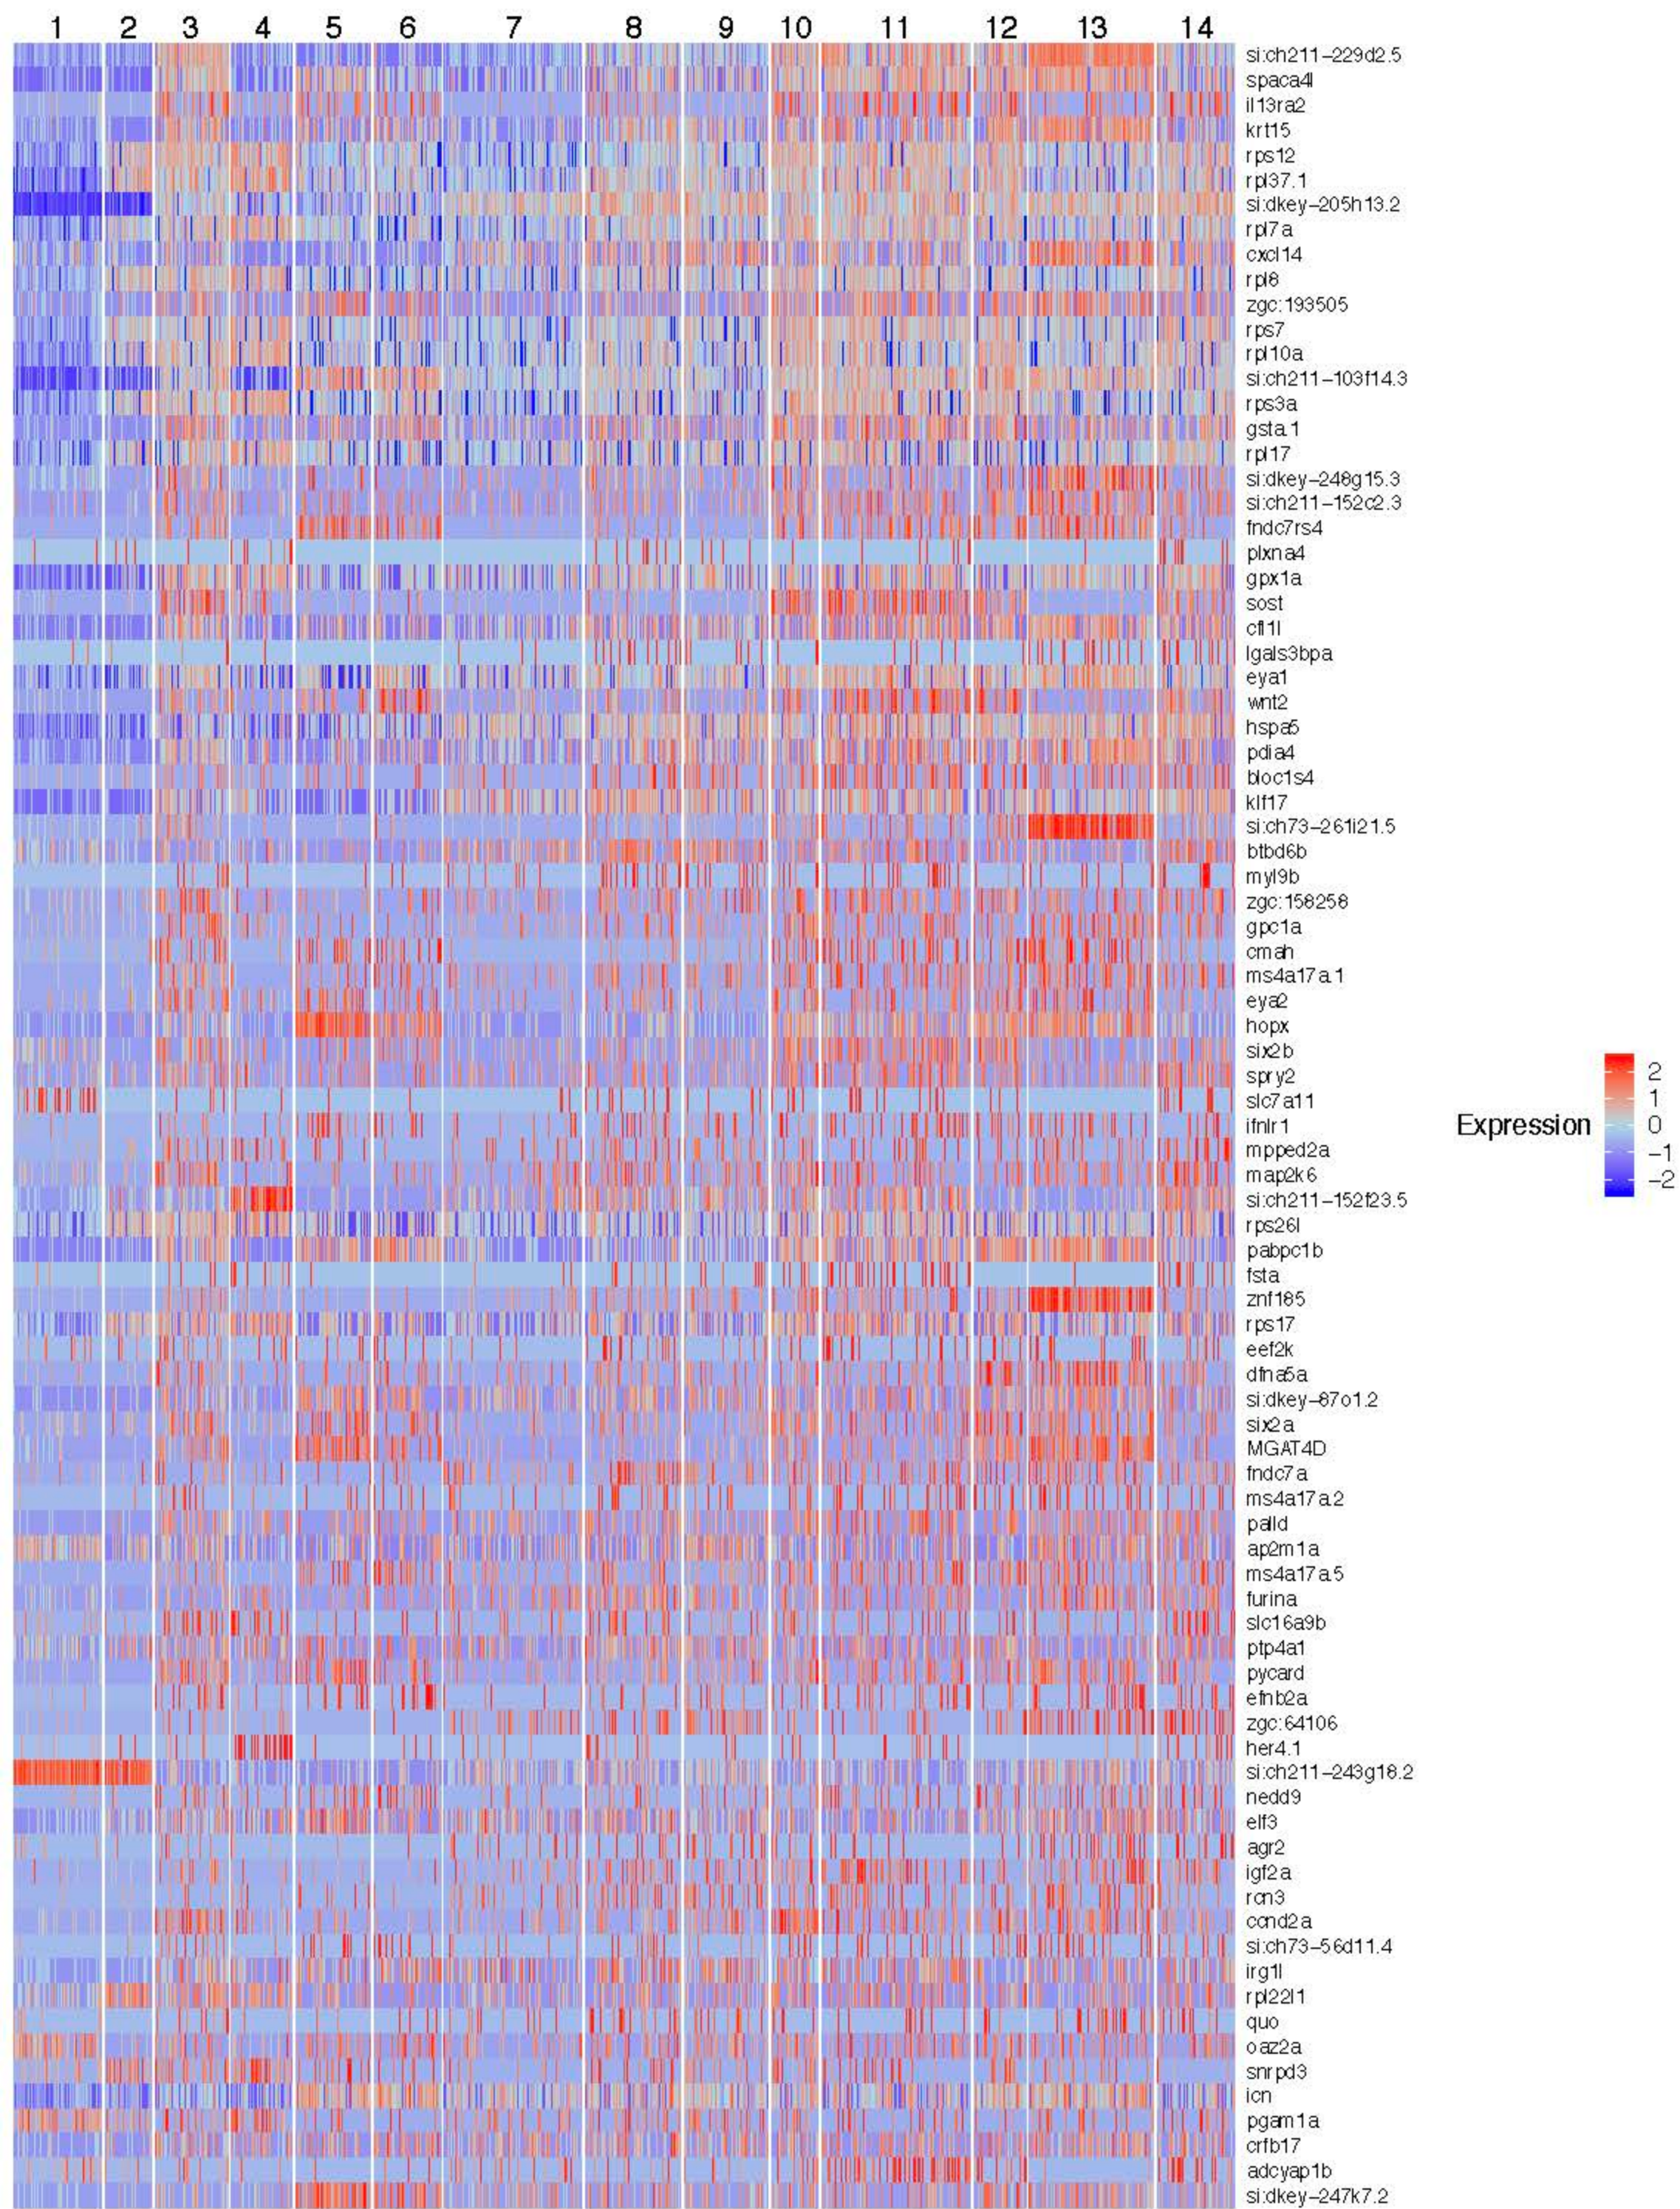

cluster 13 vs node 24

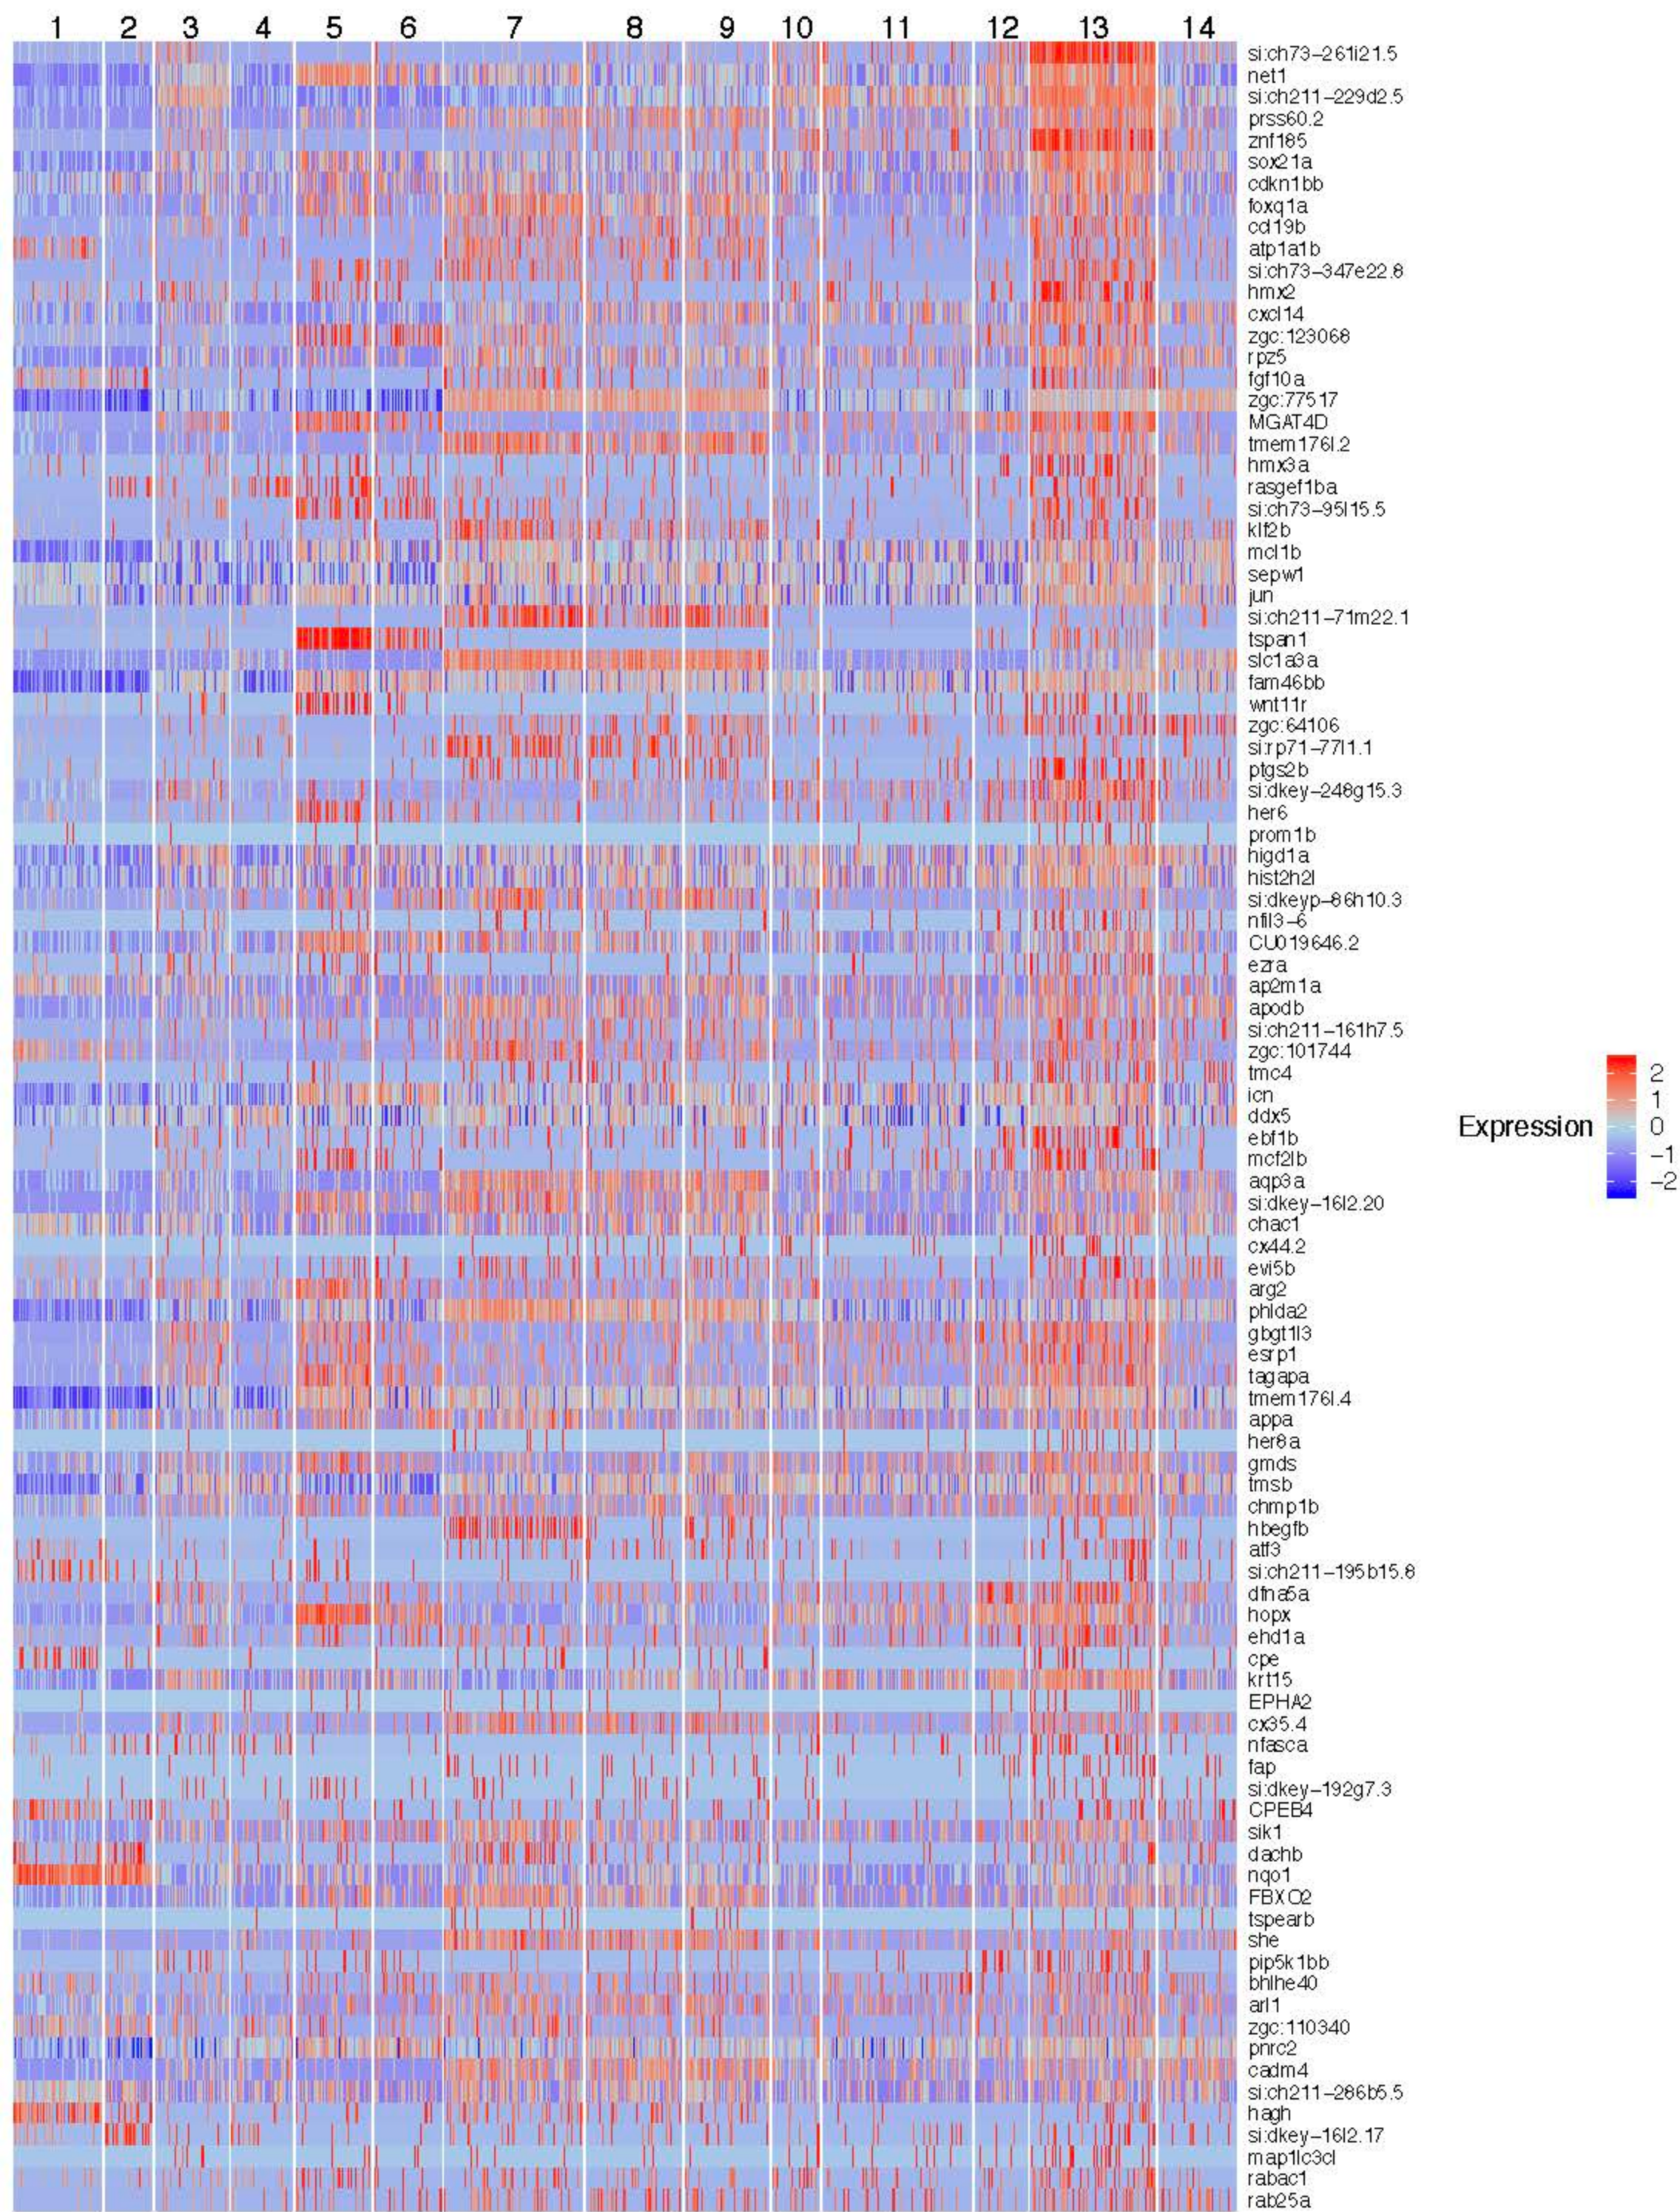

node 24 vs cluster 13

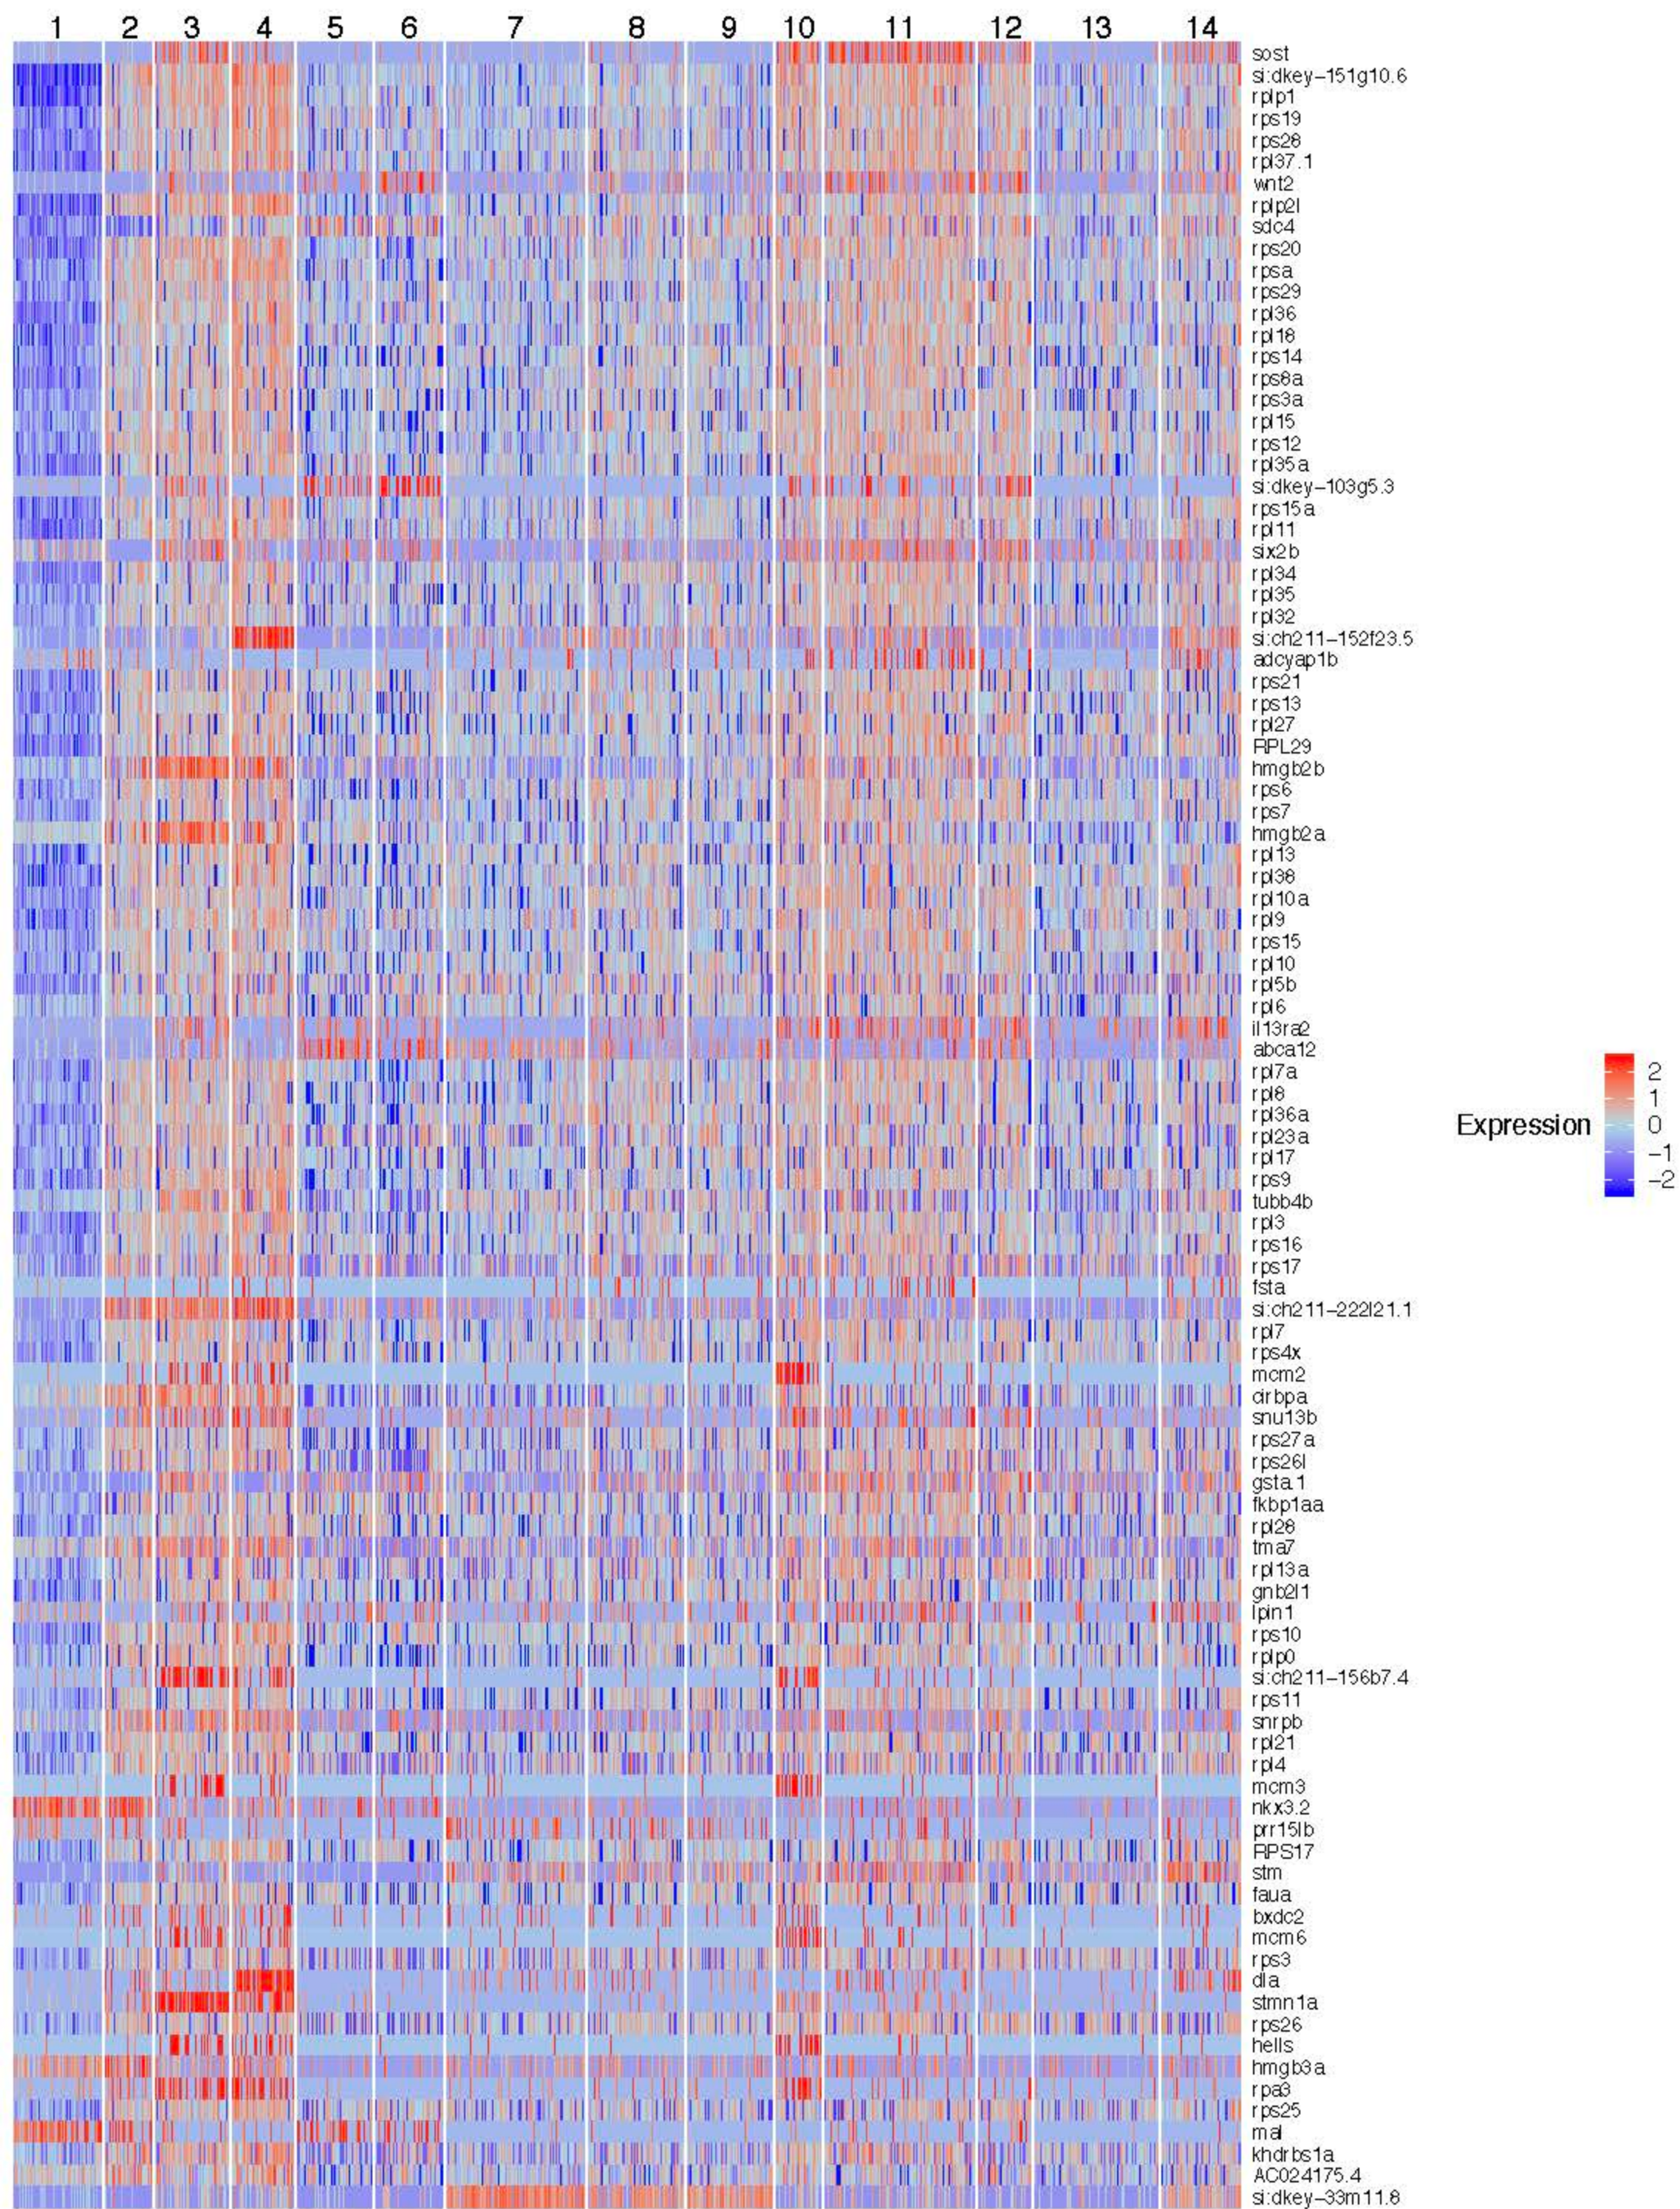

cluster 12 vs node 27

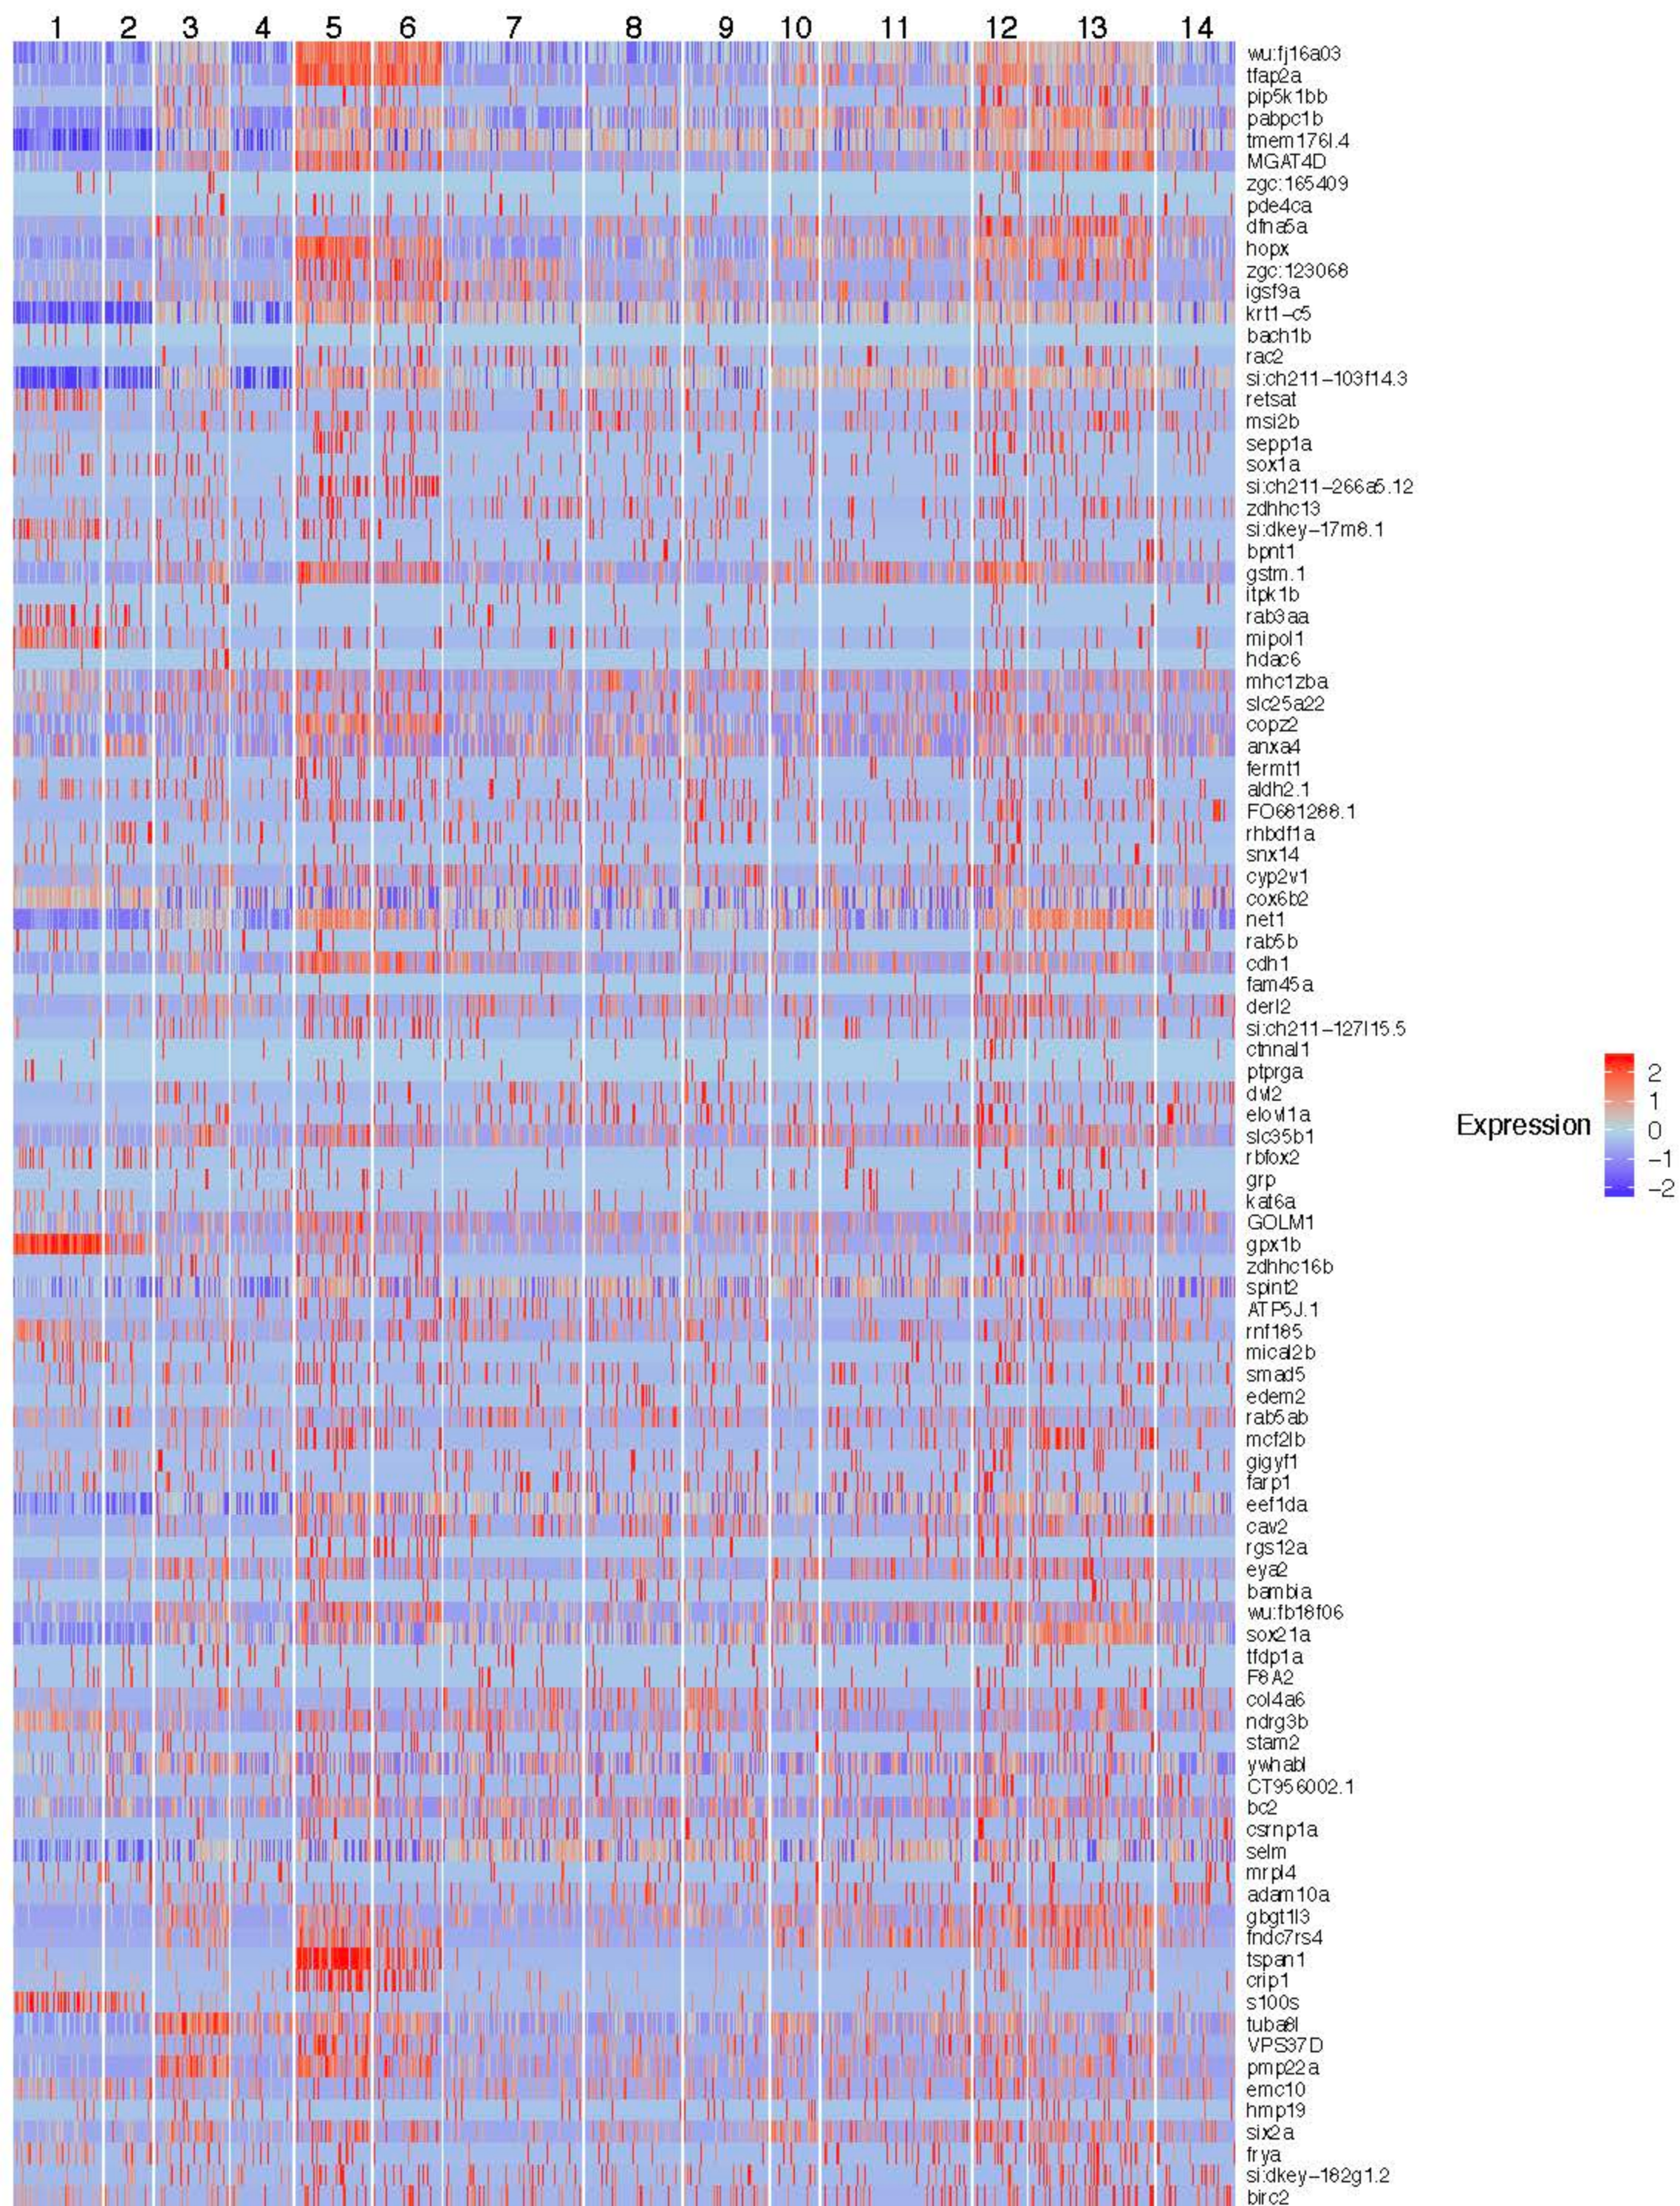

node 27 vs cluster 12

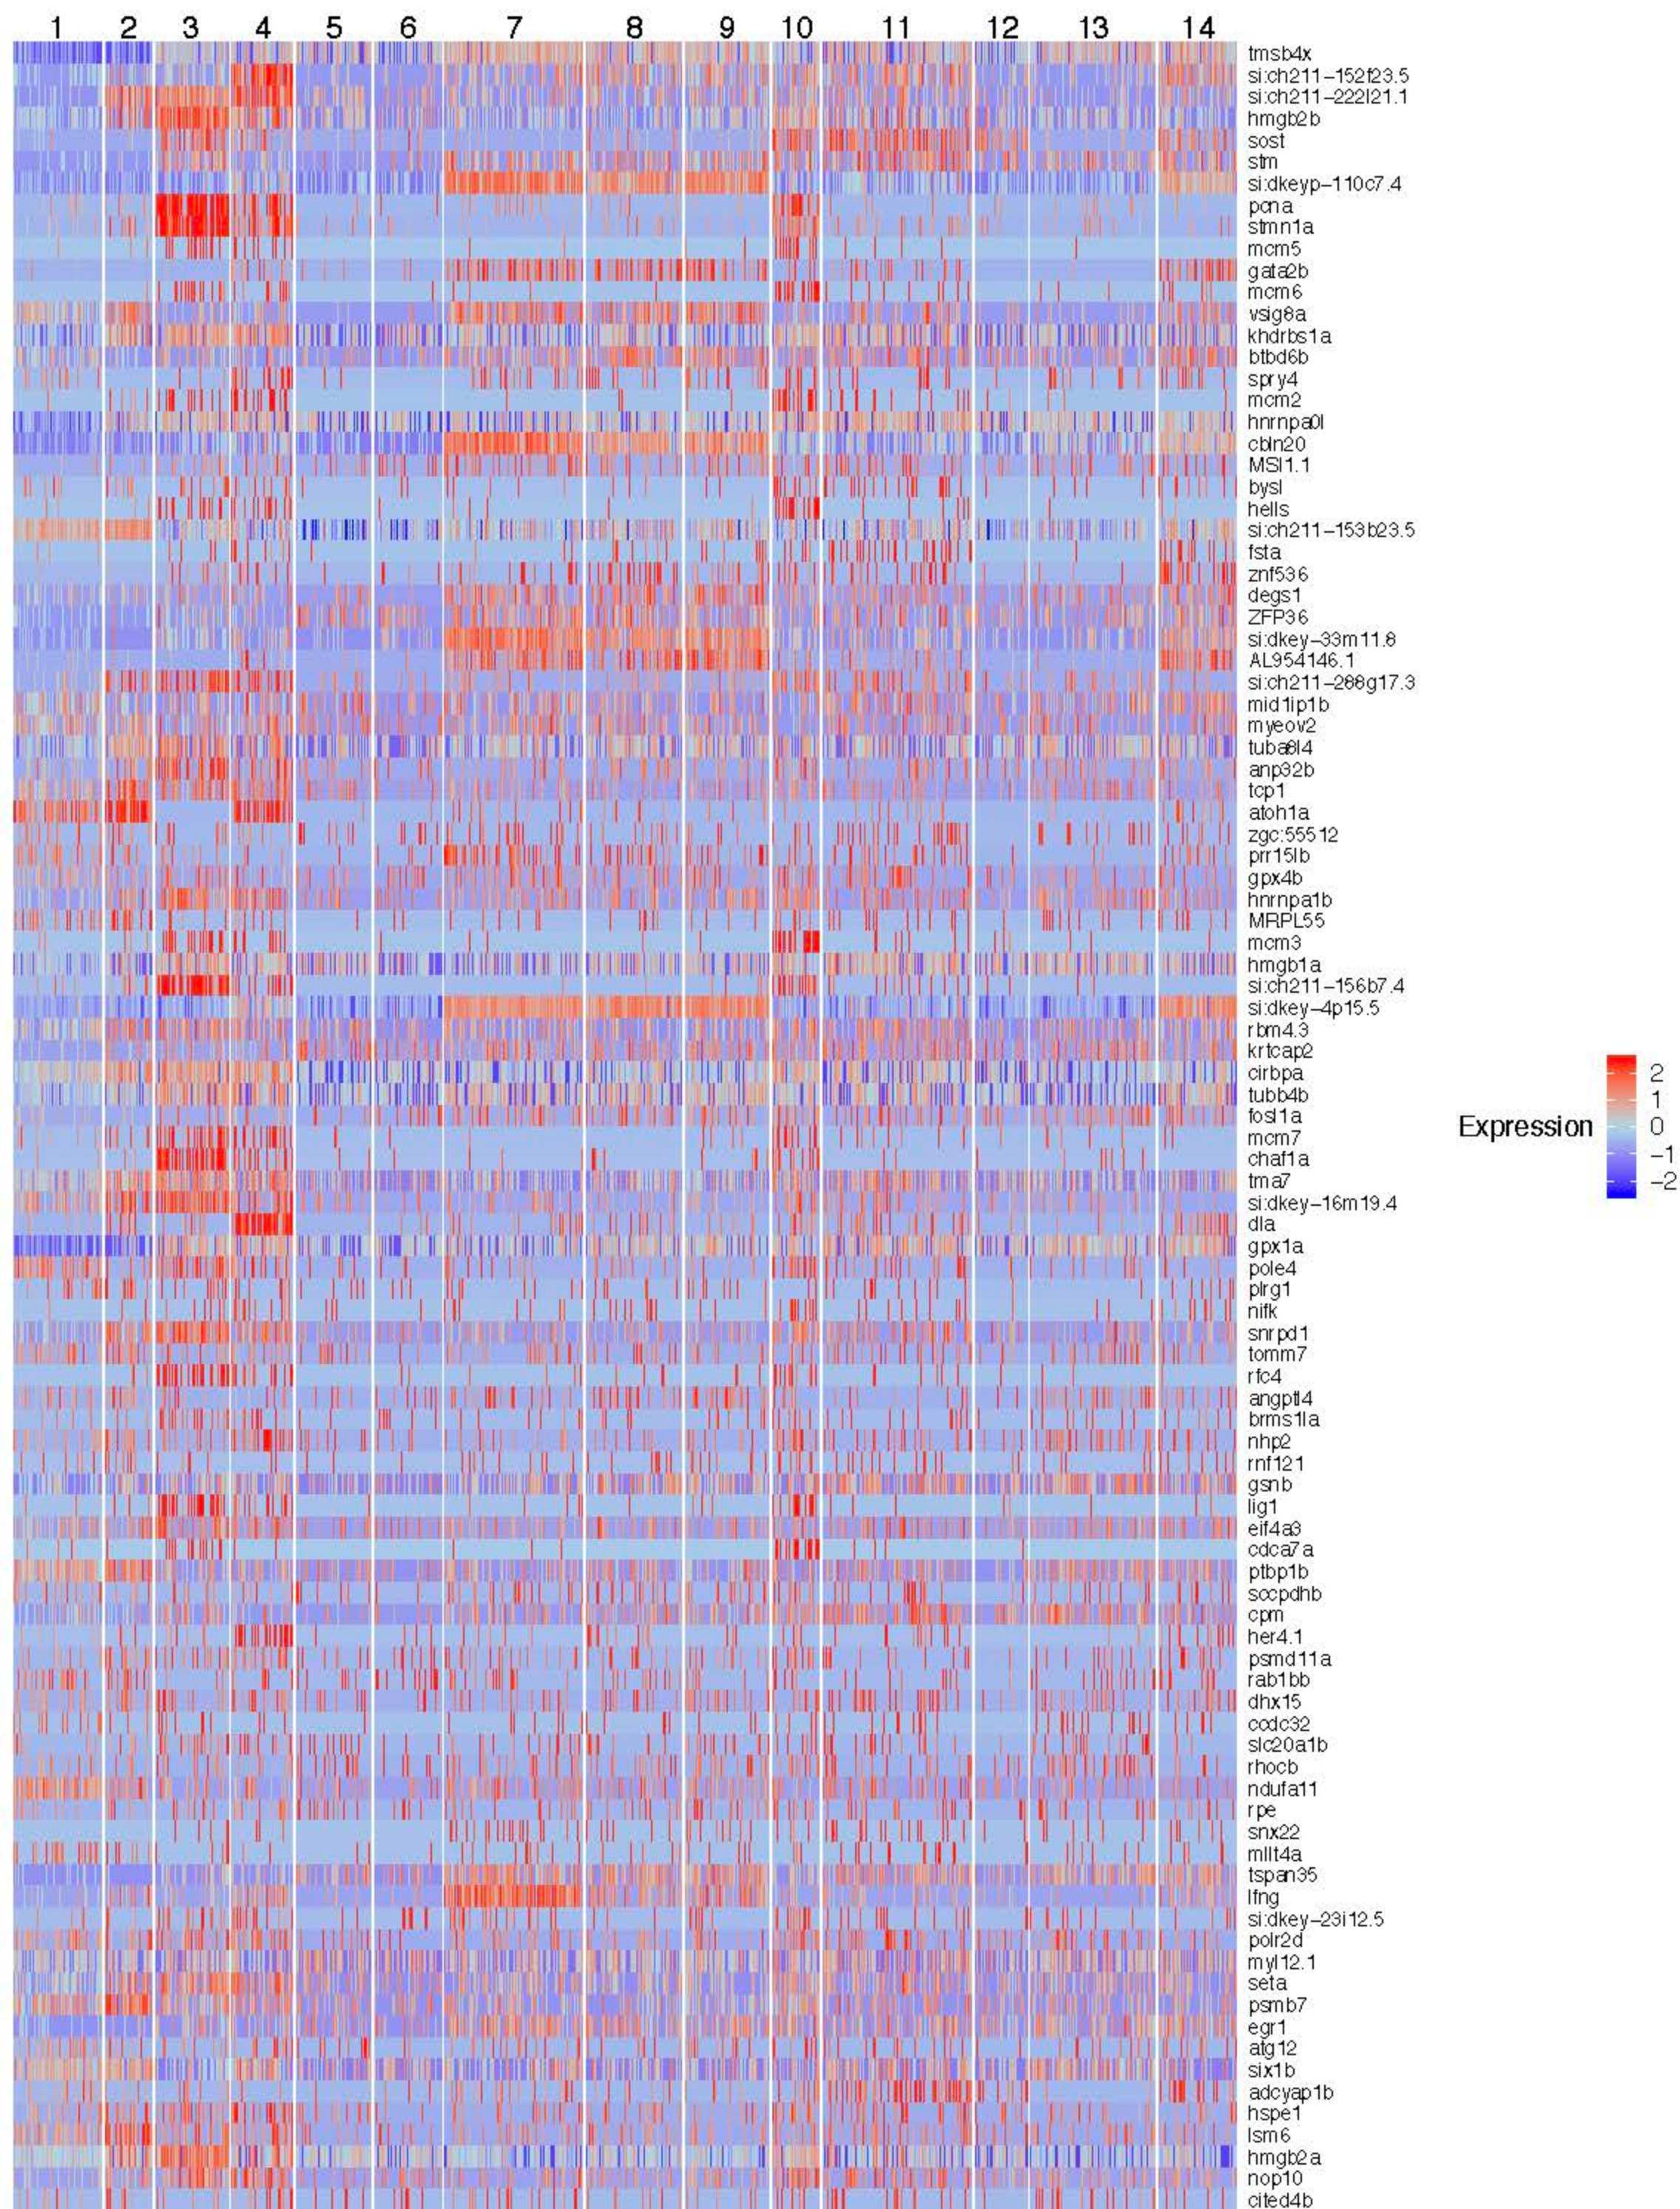

cluster 14 vs node 26

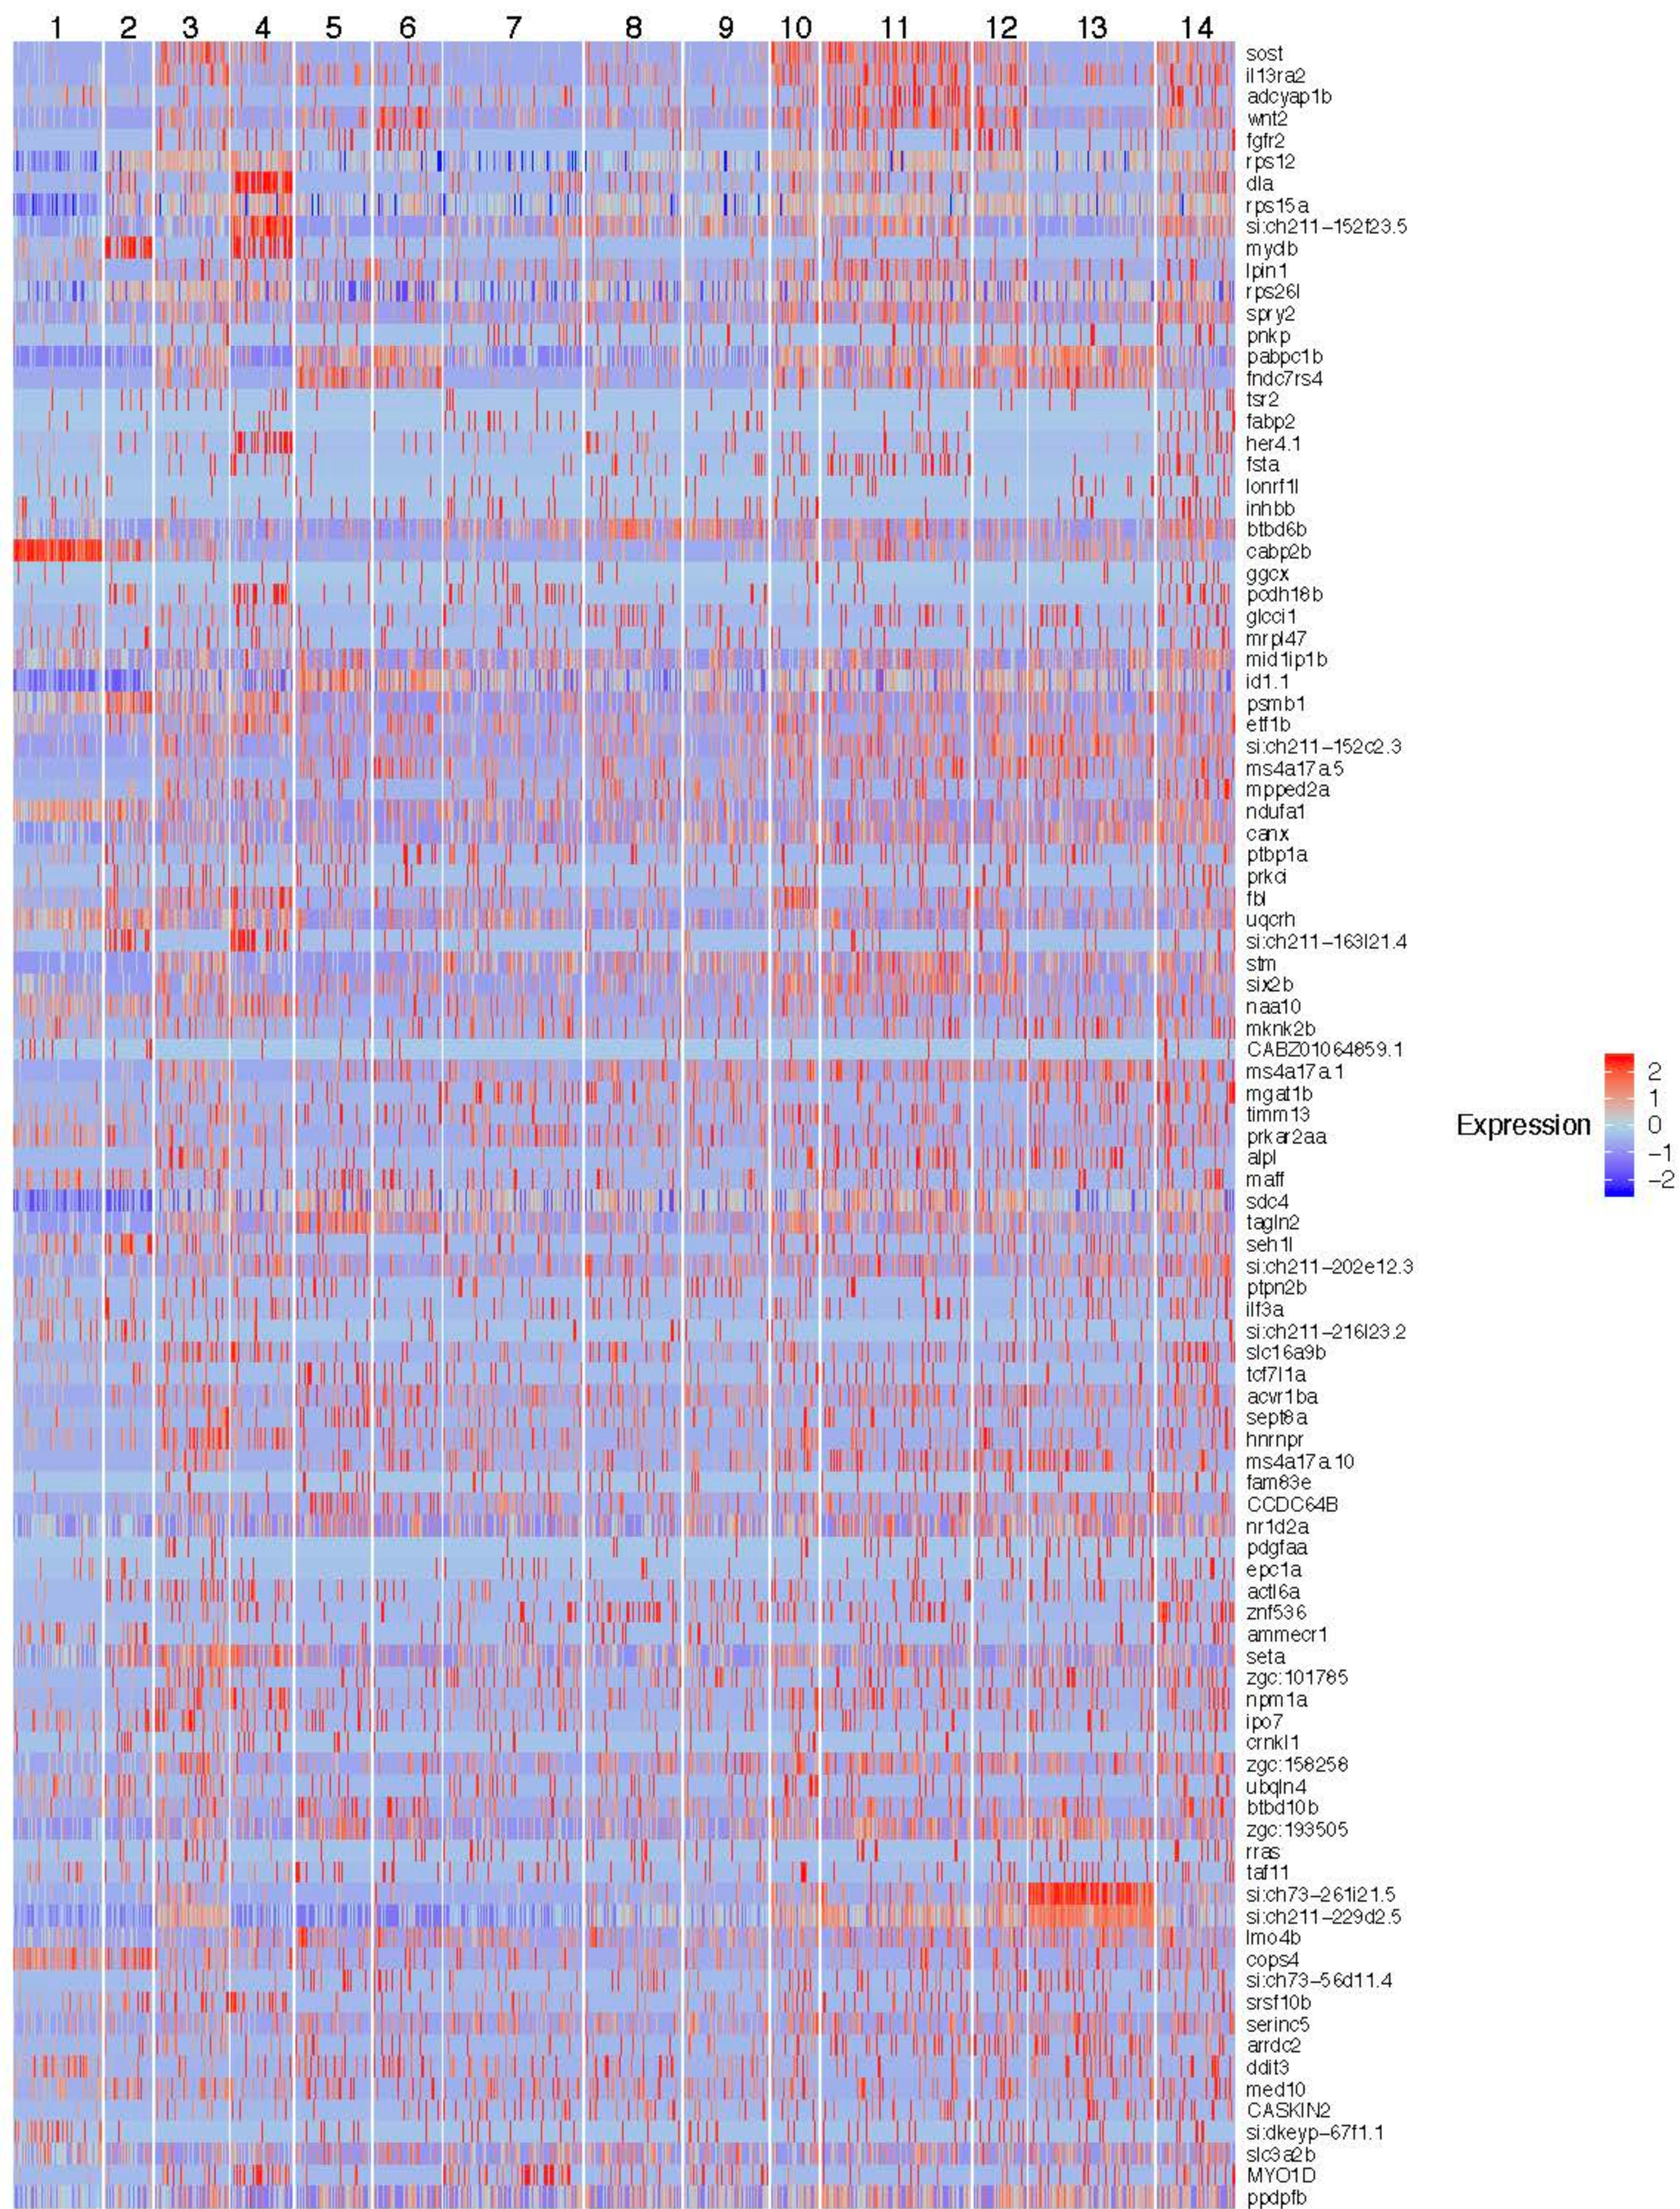

node 26 vs cluster 14

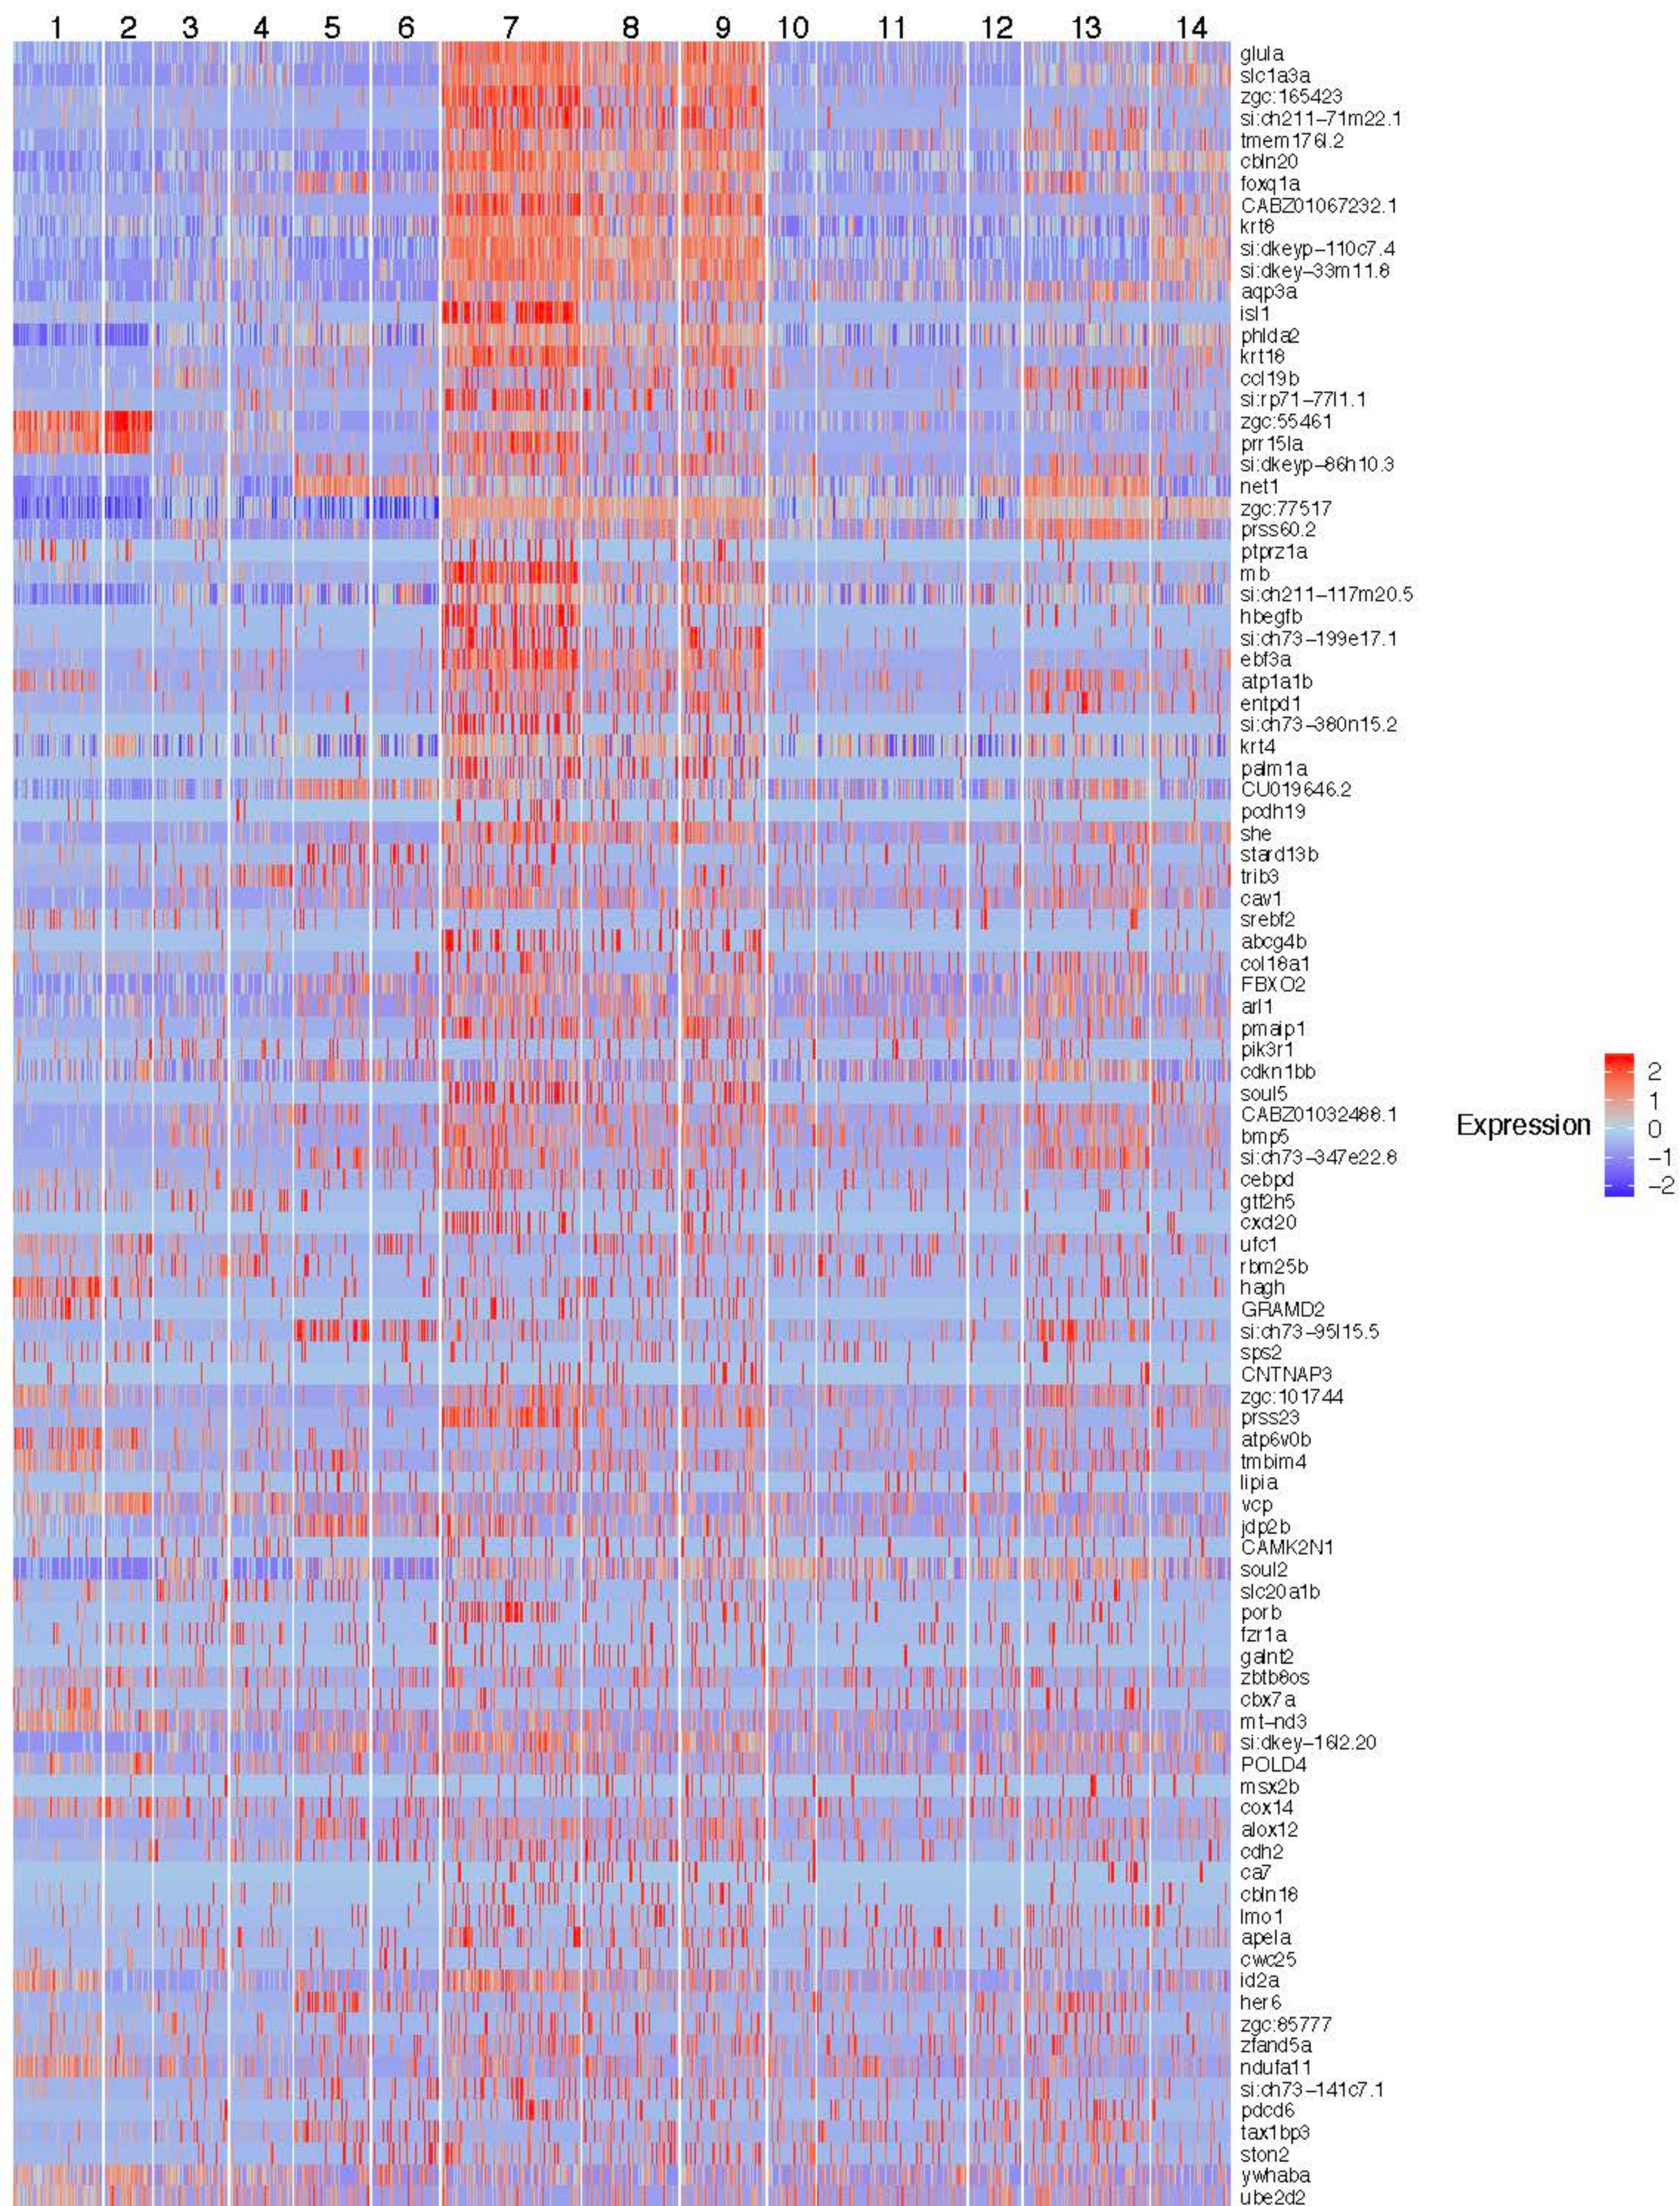

cluster 8 vs cluster 9

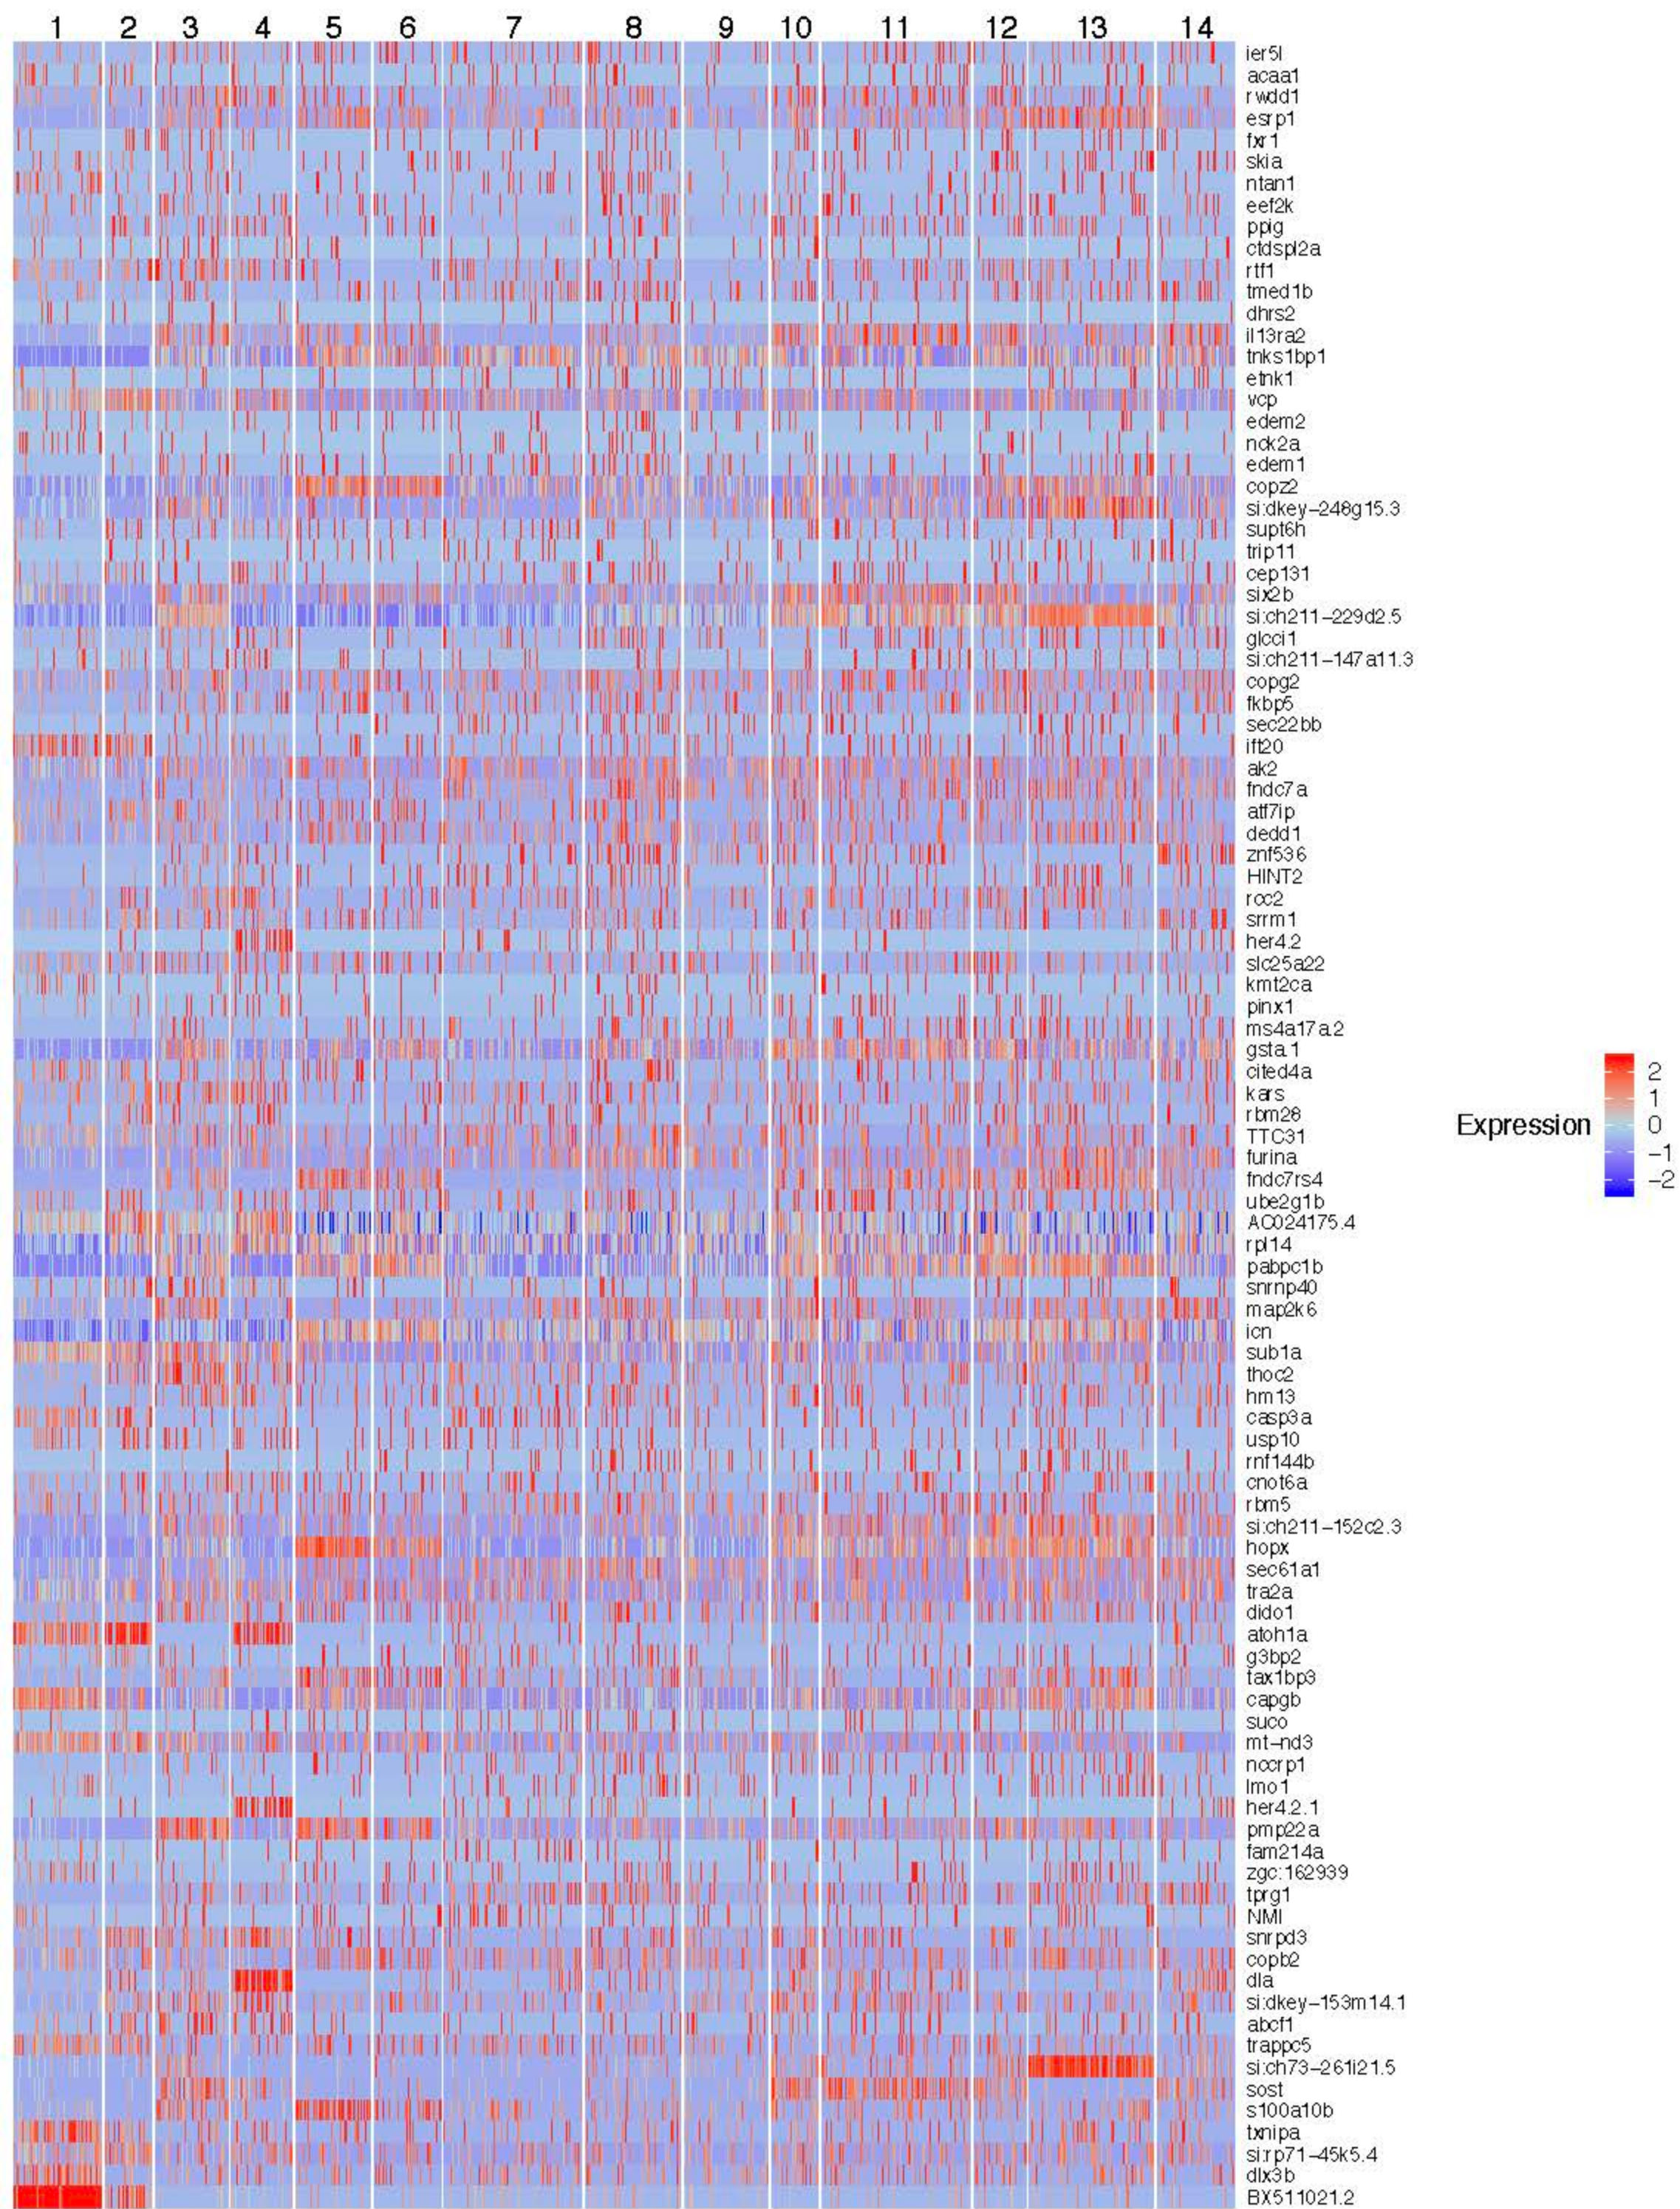

cluster 9 vs cluster 8

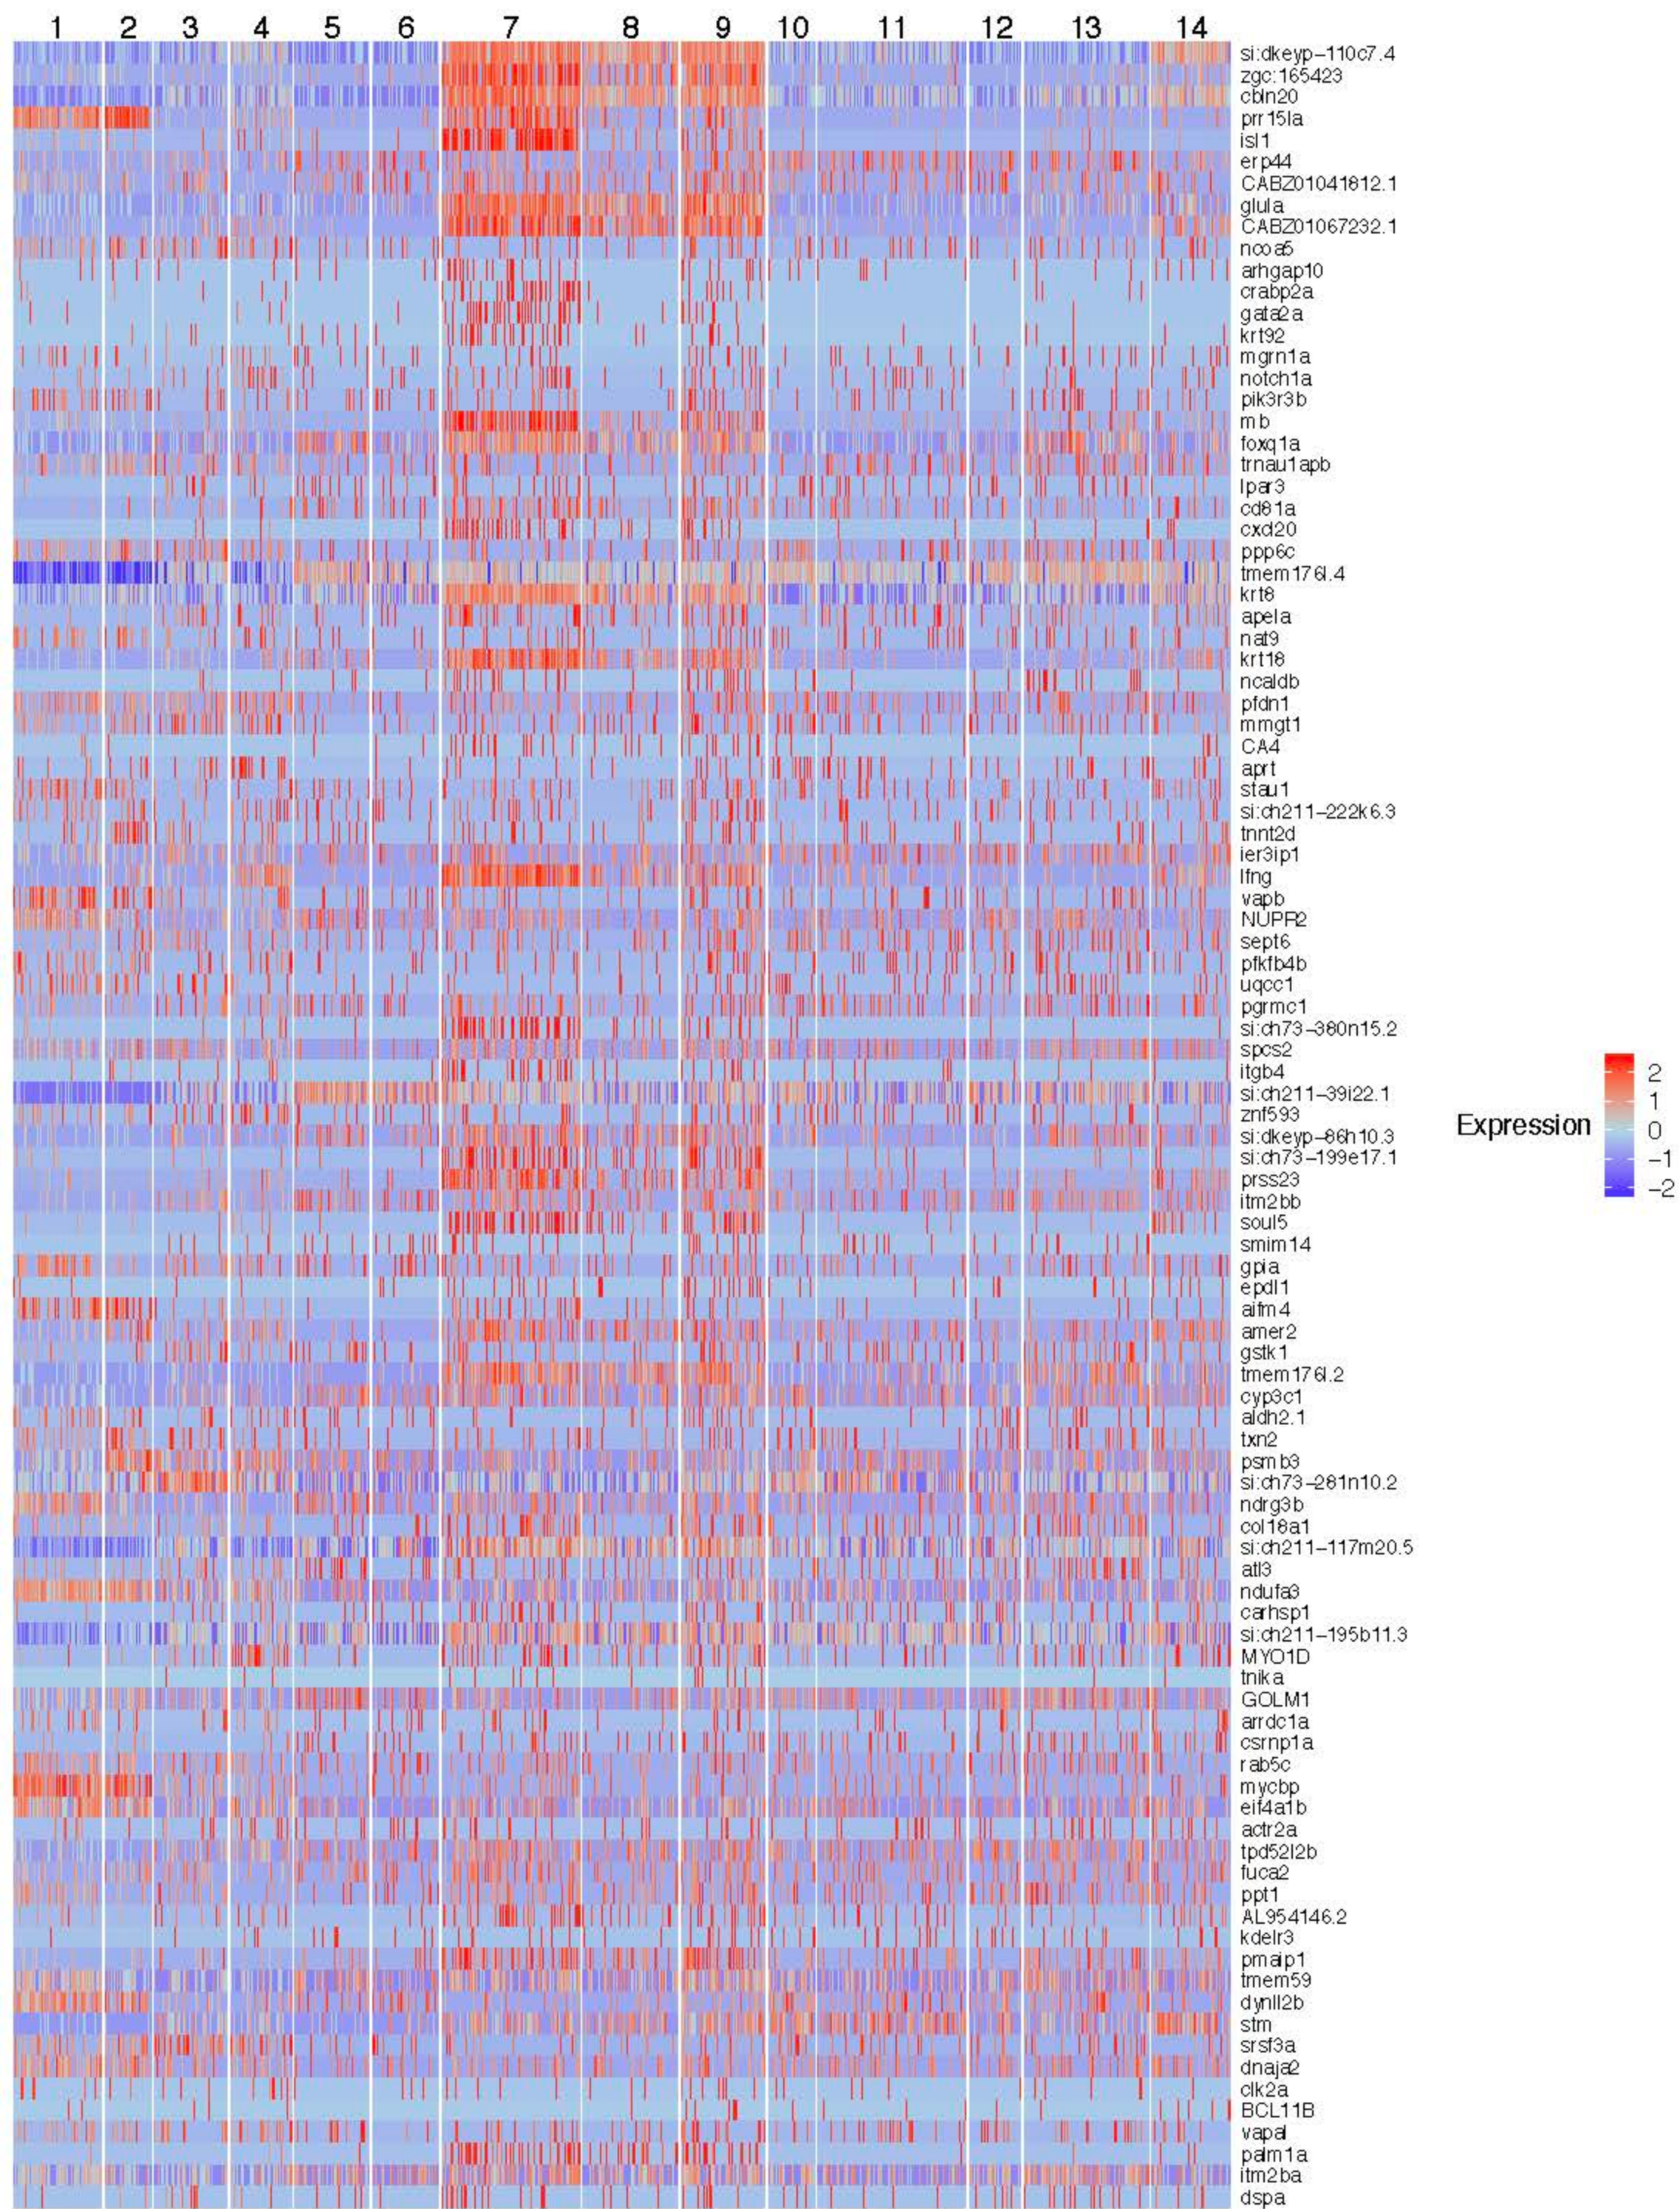

cluster 10 vs cluster 11

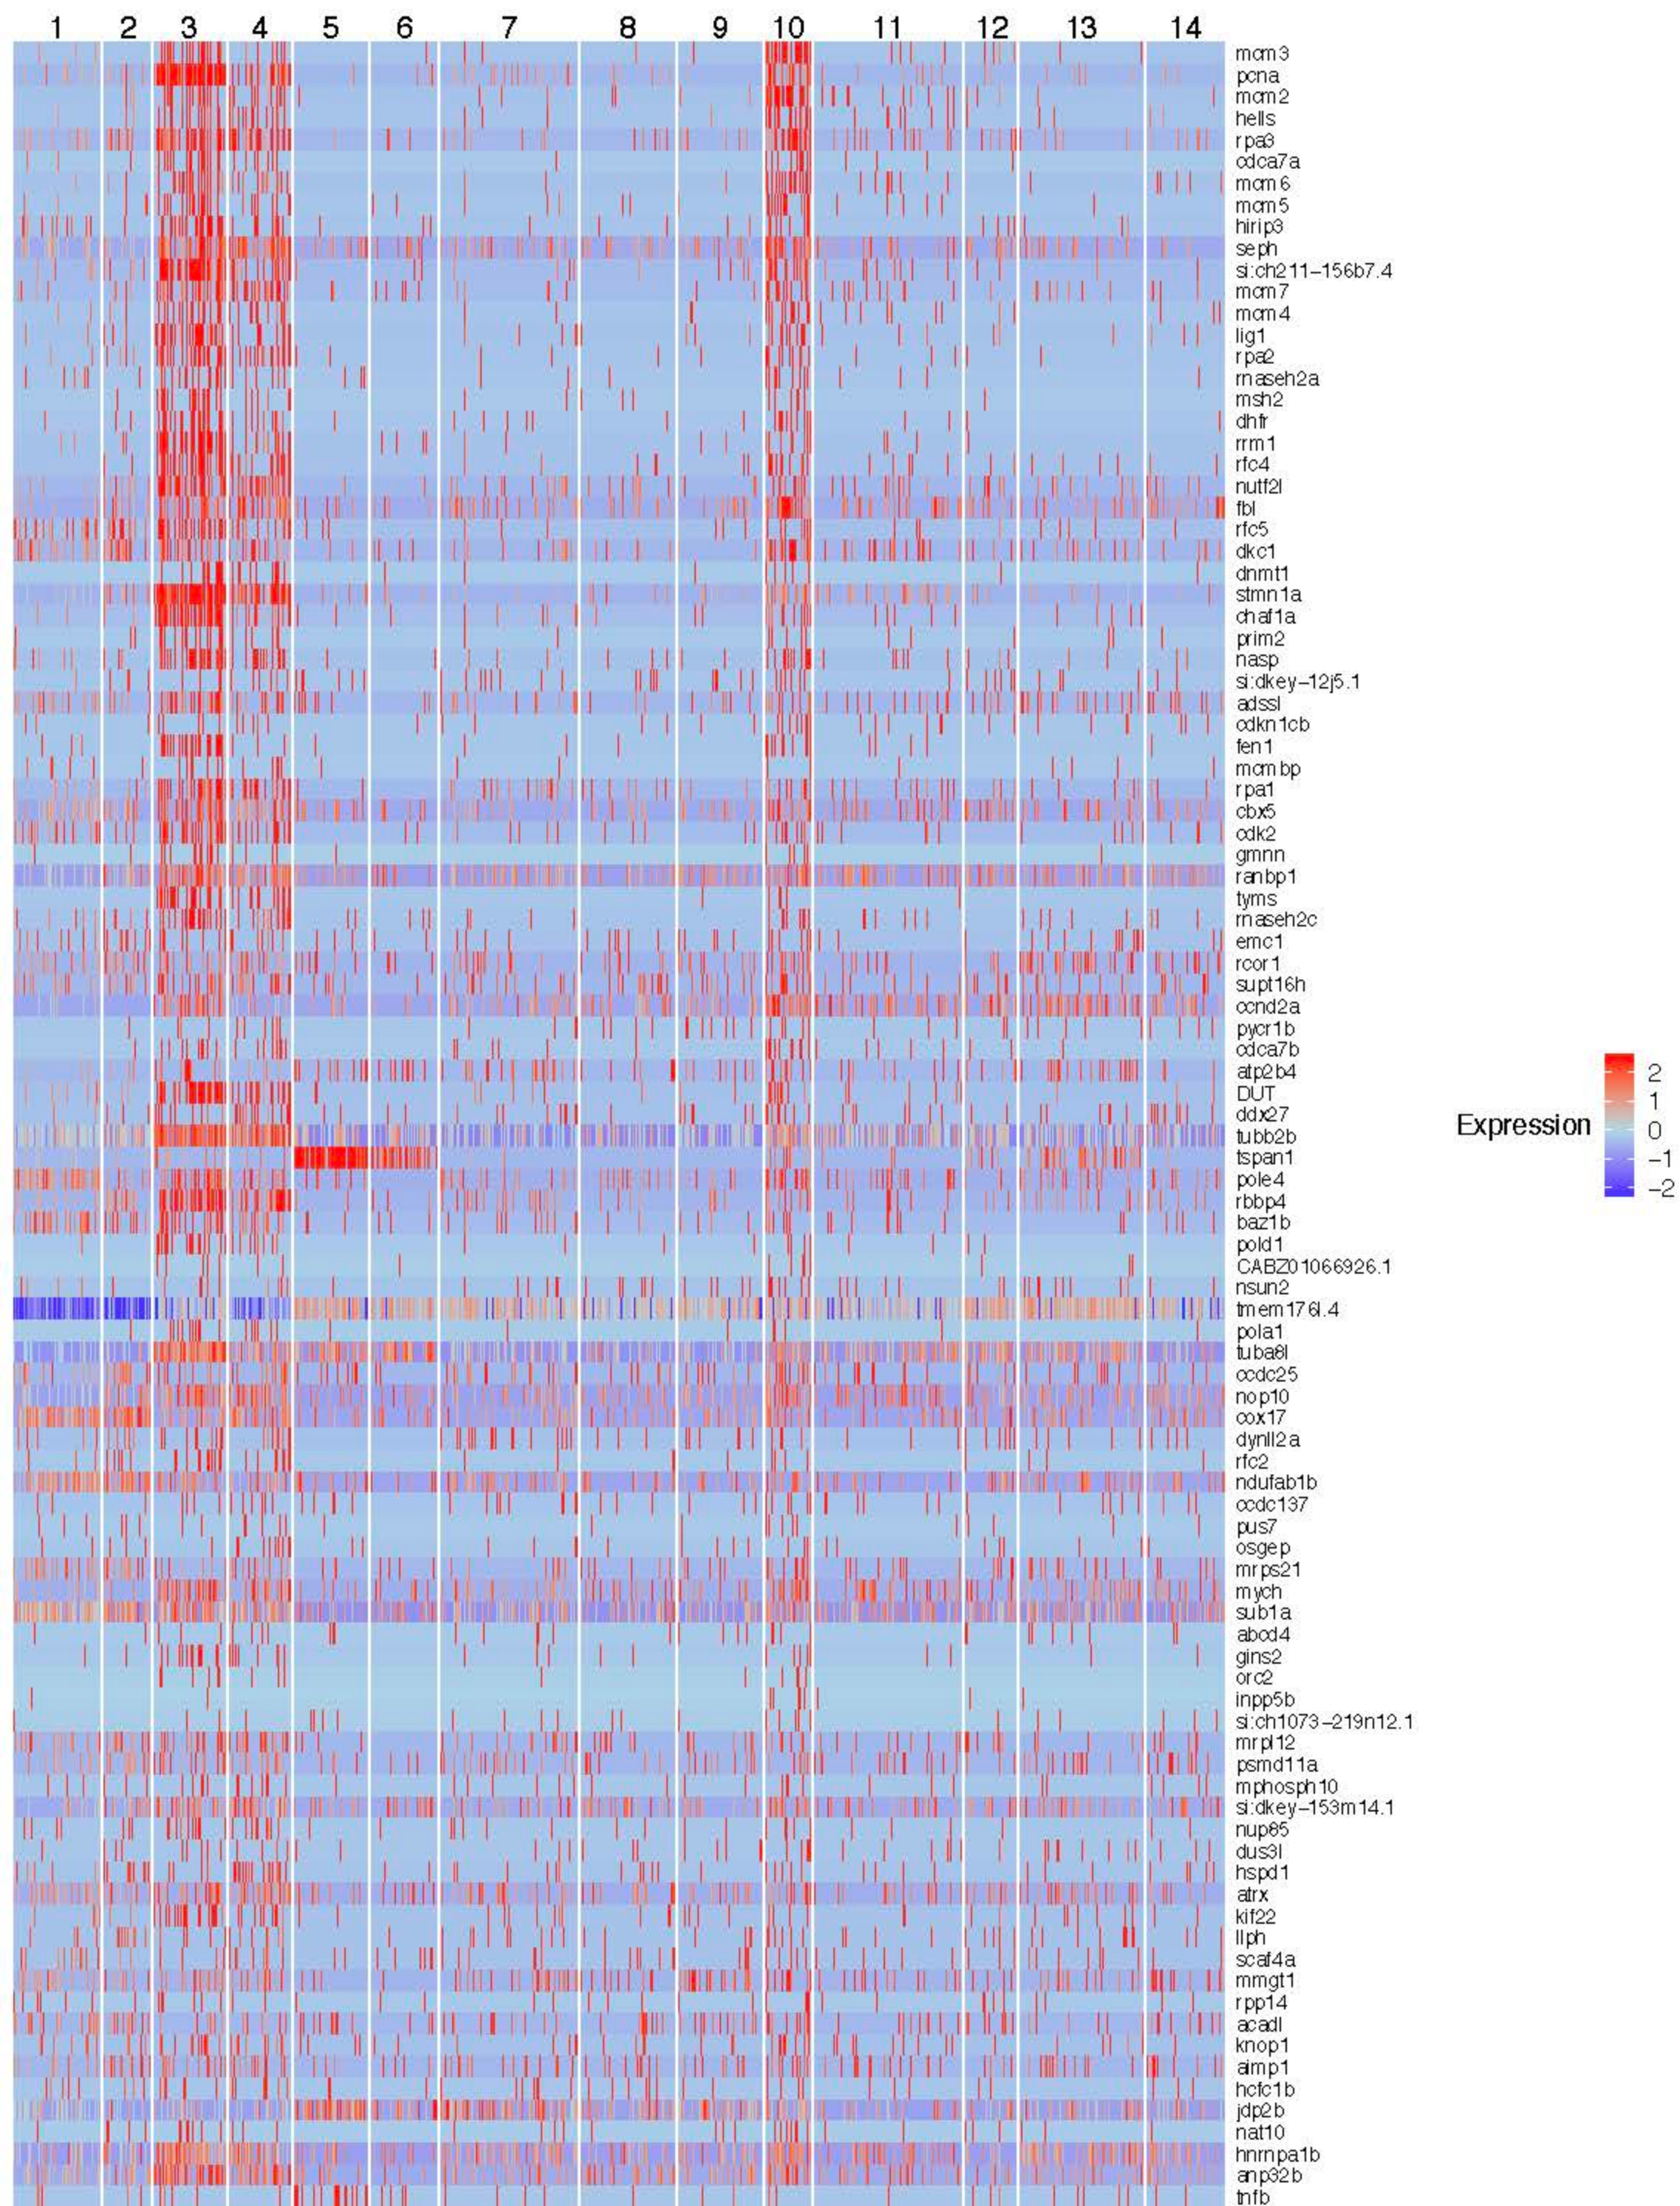

cluster 11 vs cluster 10

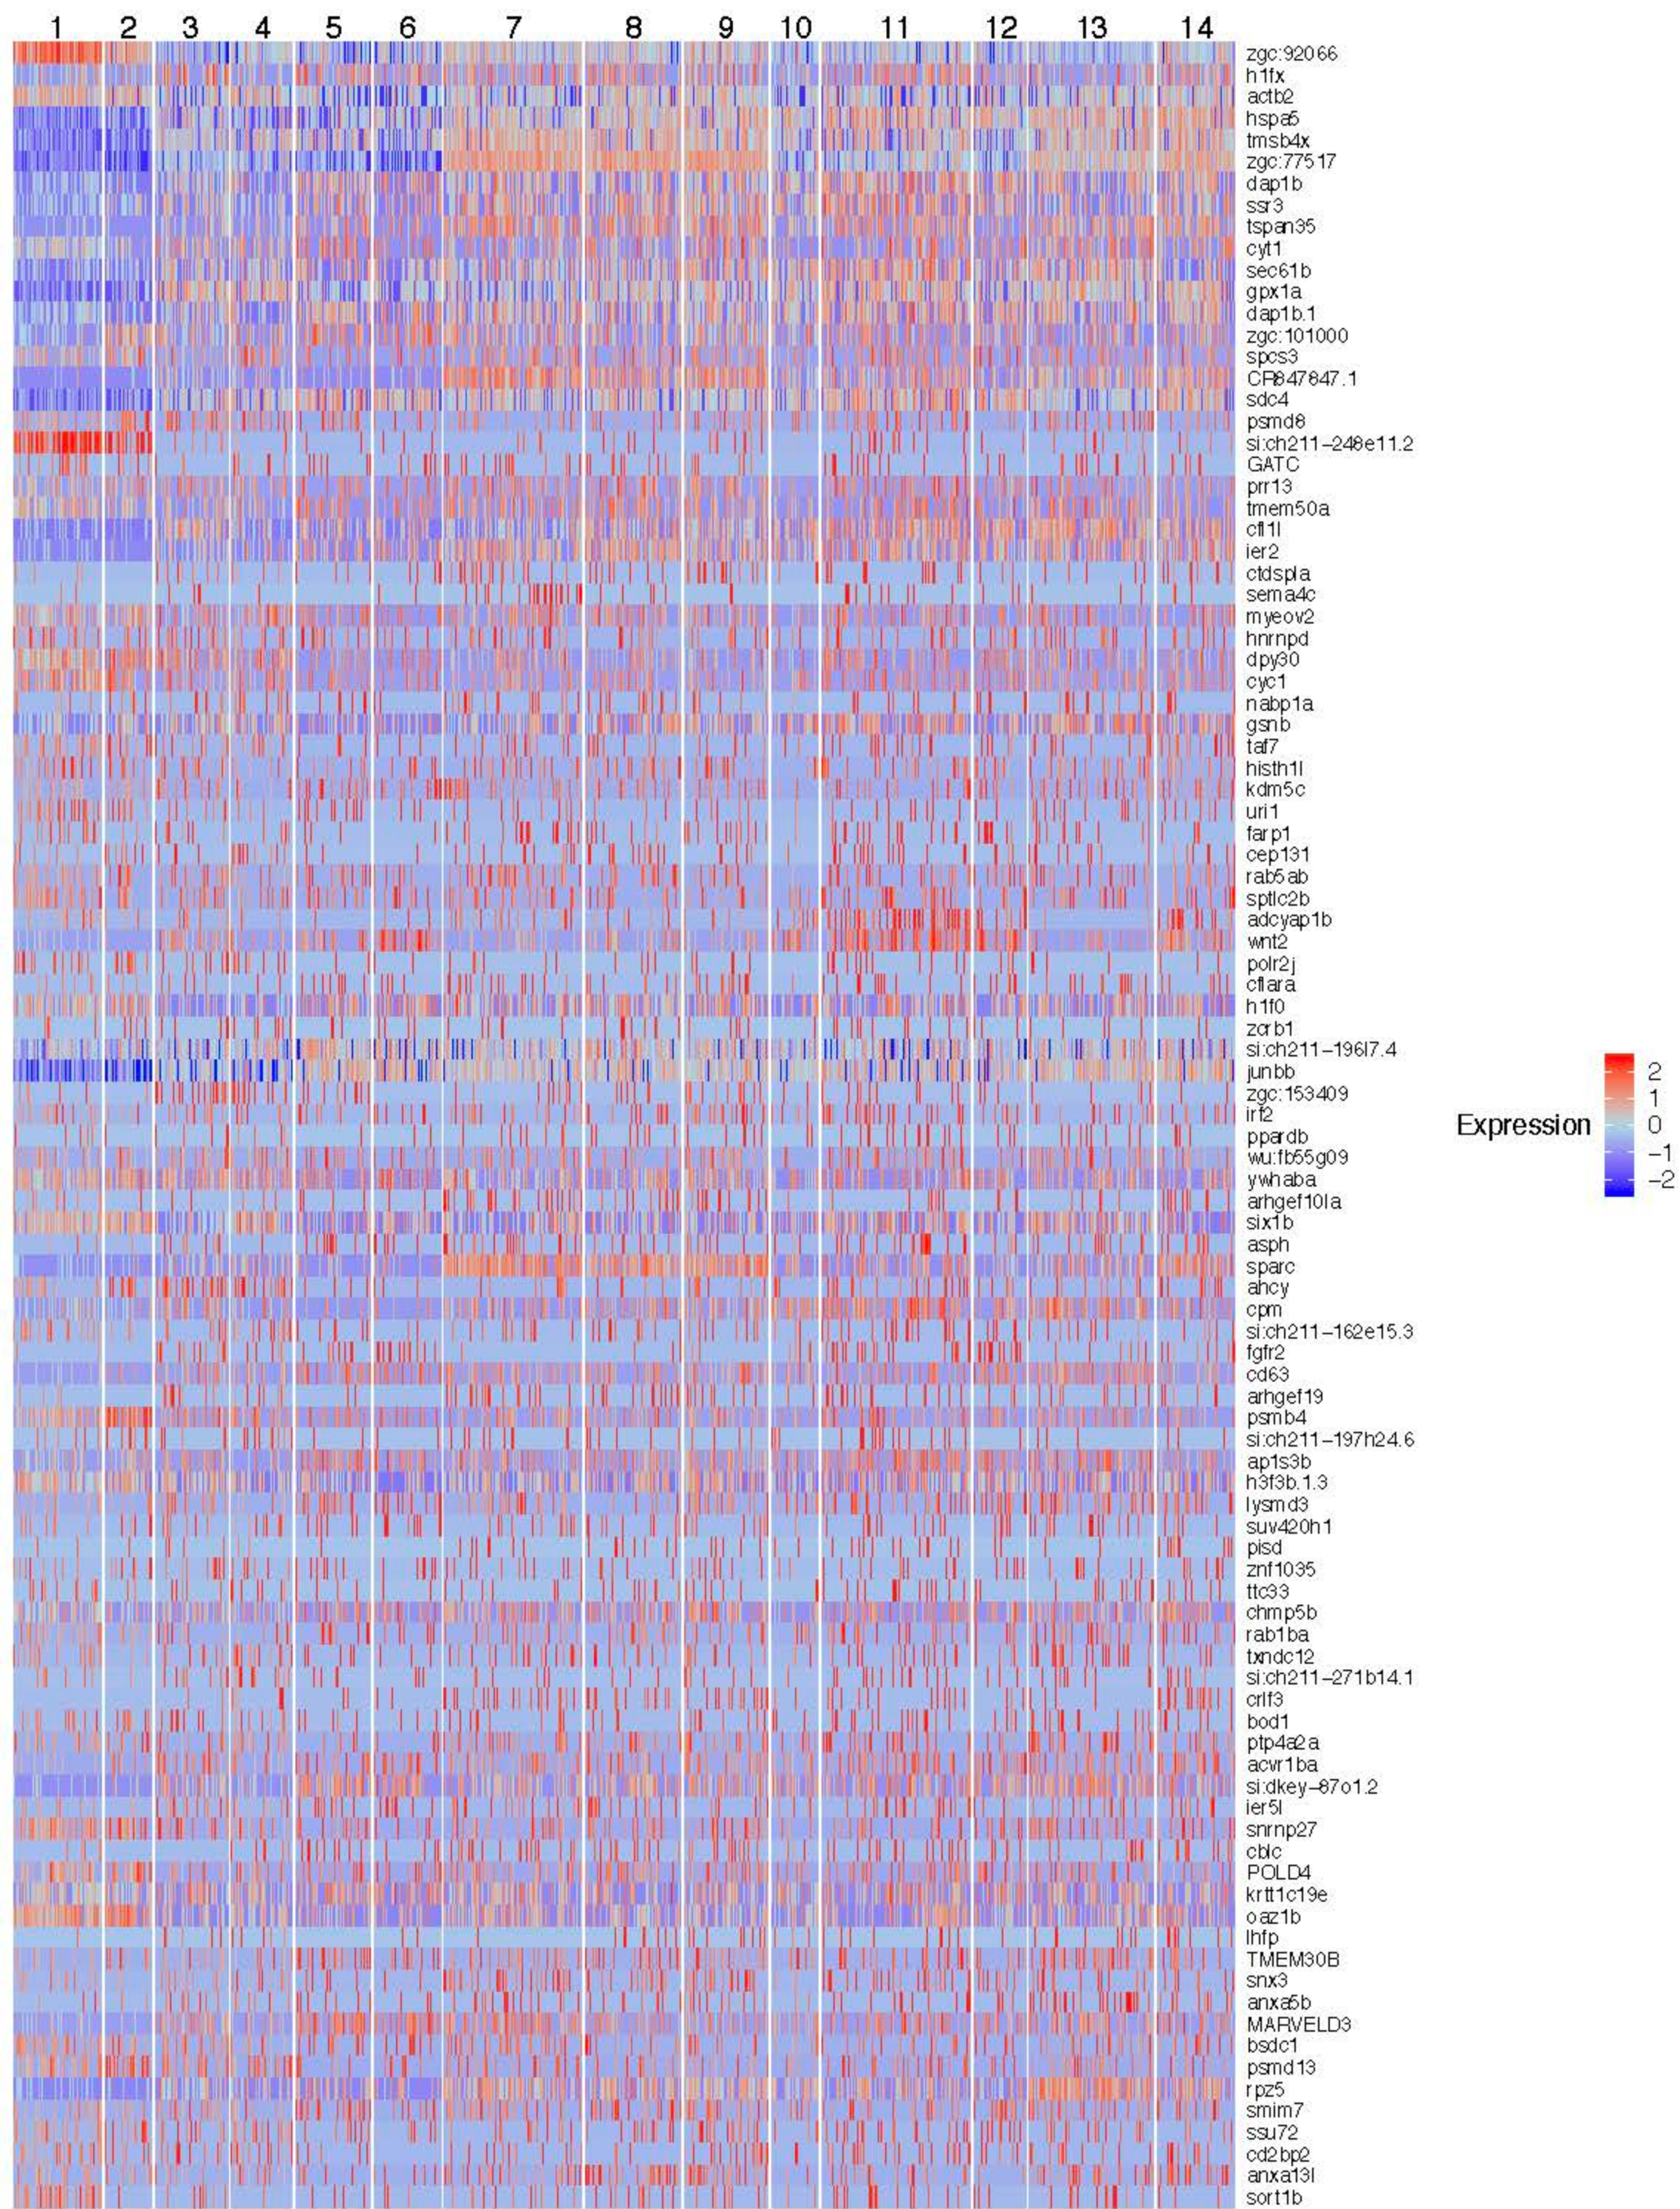

Supplement: supp [file elife-44431-supp-v1.zip › elife_poa_e44431_Supplementary_File_8.pdf]
