# Supplementary material for: scRNA-Seq reveals distinct stem cell populations that drive hair cell regeneration after loss of Fgf and Notch signaling
Source: eLife journal article supplement (doi:10.7554/elife.44431), 2019-01-25
Supplement: supp [file elife-44431-supp-v1.zip]

Archive with 28 entries (28 files):
- elife_poa_e44431_Supplementary_File_11.xlsx
- elife_poa_e44431_Supplementary_File_14.xlsx
- elife_poa_e44431_Supplementary_File_1.xlsx
- elife_poa_e44431_Supplementary_File_10.jpg
- elife_poa_e44431_Supplementary_File_5.jpg
- elife_poa_e44431_Figure_3_figure_supplement_1.pdf
- elife_poa_e44431_Figure_4_figure_supplement_3.pdf
- elife_poa_e44431_Supplementary_File_2.xlsx
- elife_poa_e44431_Supplementary_File_7.xlsx
- elife_poa_e44431_Figure_4_figure_supplement_1.pdf
- elife_poa_e44431_Supplementary_File_16.xlsx
- elife_poa_e44431_Supplementary_File_3.jpg
- elife_poa_e44431_Figure_5_video_1.mp4
- elife_poa_e44431_Supplementary_File_6.xlsx
- elife_poa_e44431_Supplementary_File_15.xlsx
- elife_poa_e44431_Transparent_Reporting_File.docx
- elife_poa_e44431_Supplementary_File_8.pdf
- elife_poa_e44431_Figure_1_video_1.mov
- elife_poa_e44431_Figure_2_figure_supplement_2.pdf
- elife_poa_e44431_Figure_4_figure_supplement_2.pdf
- elife_poa_e44431_Supplementary_File_13.xlsx
- elife_poa_e44431_Figure_6_figure_supplement_1.pdf
- elife_poa_e44431_Supplementary_File_4.xlsx
- elife_poa_e44431_Figure_2_figure_supplement_1.pdf
- elife_poa_e44431_Supplementary_File_9.xlsx
- elife_poa_e44431_Figure_3_figure_supplement_2.pdf
- elife_poa_e44431_Supplementary_File_12.xlsx
- elife_poa_e44431_Figure_7_figure_supplement_1.pdf
