# Supplementary material for: scRNA-Seq reveals distinct stem cell populations that drive hair cell regeneration after loss of Fgf and Notch signaling
Source: eLife journal article supplement (doi:10.7554/elife.44431), 2019-01-25
Supplement: supp [file elife-44431-supp-v1.zip › elife_poa_e44431_Figure_4_figure_supplement_2.pdf]

Figure 4-figure supplement 2

| ENSEMBL_GENE_ID      | GENE NAME                                                                                        |
|----------------------|--------------------------------------------------------------------------------------------------|
| ENSDARG00000077982   | E74-like factor 3 (ets domain transcription factor, epithelial-specific )(elf3)                  |
| ENSDARG00000015355   | FOS-like antigen 1a(fosl1a)                                                                      |
| ENSDARG00000009094   | GATA binding protein 2b(gata2b)                                                                  |
| ENSDARG000000089368  | HOP homeobox(hopx)                                                                               |
| ENSDARG00000004023   | ISL LIM homeobox 1(isl1)                                                                         |
| ENSDARG000000020133  | Jun dimerization protein 2b(jdp2b)                                                               |
| ENSDARG000000031664  | SRY (sex determining region Y)-box 21a(sox21a)                                                   |
| ENSDARG000000012656  | activating transcription factor 6(atf6)                                                          |
| ENSDARG000000069196  | early B-cell factor 1b(ebf1b)                                                                    |
| ENSDARG000000100244  | early B-cell factor 3a(ebf3a)                                                                    |
| ENSDARG000000018303  | ets variant 4(etv4)                                                                              |
| ENSDARG000000030896  | forkhead box Q1a(foxq1a)                                                                         |
| ENSDARG000000056438  | hairy-related 9(her9)                                                                            |
| ENSDARG000000070538  | hes-related family bHLH transcription factor with YRPW motif 1(hey1)                             |
| ENSDARG0000000100826 | hypoxia-inducible factor 1, alpha subunit, like(hif1al)                                          |
| ENSDARG000000074378  | jun B proto-oncogene a(junba)                                                                    |
| ENSDARG000000104773  | jun B proto-oncogene b(junbb)                                                                    |
| ENSDARG000000043531  | jun proto-oncogene(jun)                                                                          |
| ENSDARG0000000103483 | lipopolysaccharide-induced TNF factor(litaf)                                                     |
| ENSDARG000000099184  | mitogen-activated protein kinase kinase 6(map2k6)                                                |
| ENSDARG000000003820  | nuclear receptor subfamily 1, group D, member 2a(nr1d2a)                                         |
| ENSDARG000000053291  | proline-rich nuclear receptor coactivator 2(pnrc2)                                               |
| ENSDARG0000000059279 | transcription factor AP-2 alpha(tfap2a)                                                          |
| ENSDARG000000031683  | v-fos FBJ murine osteosarcoma viral oncogene homolog Ab(fosab)                                   |
| ENSEMBL_GENE_ID      | GENE NAME                                                                                        |
| ENSDARG000000077982  | E74-like factor 3 (ets domain transcription factor, epithelial-specific )(elf3)                  |
| ENSDARG000000015355  | FOS-like antigen 1a(fosl1a)                                                                      |
| ENSDARG000000089368  | HOP homeobox(hopx)                                                                               |
| ENSDARG000000020133  | Jun dimerization protein 2b(jdp2b)                                                               |
| ENSDARG000000018303  | ets variant 4(etv4)                                                                              |
| ENSDARG000000074378  | jun B proto-oncogene a(junba)                                                                    |
| ENSDARG000000104773  | jun B proto-oncogene b(junbb)                                                                    |
| ENSDARG000000031683  | v-fos FBJ murine osteosarcoma viral oncogene homolog Ab(fosab)                                   |
| ENSEMBL_GENE_ID      | GENE NAME                                                                                        |
| ENSDARG000000020850  | eukaryotic translation elongation factor 1 alpha 1, like 1(eef1a1l1)                             |
| ENSDARG000000102291  | eukaryotic translation elongation factor 1 delta a (guanine nucleotide exchange protein)(eef1da) |
| ENSDARG0000000099104 | ribosomal protein L24(rpl24)                                                                     |
| ENSDARG000000005791  | ribosomal protein L28(rpl28)                                                                     |
| ENSDARG000000018334  | ribosomal protein L35(rpl35)                                                                     |
| ENSDARG0000000088030 | ribosomal protein L35a(rpl35a)                                                                   |
| ENSDARG0000000036298 | ribosomal protein S13(rps13)                                                                     |
| ENSDARG0000000013763 | ribosome binding protein 1a(rrbp1a)                                                              |
| ENSDARG000000043154  | uncoupling protein 2(ucp2)                                                                       |
| ENSDARG000000098458  | zgc:171772(zgc:171772)                                                                           |
| ENSEMBL_GENE_ID      | GENE NAME                                                                                        |
| ENSDARG000000015088  | DnaJ (Hsp40) homolog, subfamily B, member 11(dnajb11)                                            |
| ENSDARG000000028396  | FK506 binding protein 5(fkbp5)                                                                   |
| ENSDARG000000037488  | calnexin(canx)                                                                                   |
| ENSDARG000000103979  | calreticulin 3a(calr3a)                                                                          |
| ENSDARG000000102808  | calreticulin 3b(calr3b)                                                                          |
| ENSDARG0000000076290 | calreticulin(calr)                                                                               |
| ENSDARG000000003570  | heat shock protein 90, beta (grp94), member 1(hsp90b1)                                           |
| ENSDARG000000018491  | protein disulfide isomerase family A, member 4(pdia4)                                            |
| ENSEMBL_GENE_ID      | GENE NAME                                                                                        |
| ENSDARG000000097691  | KIAA0101(kiaa0101)                                                                               |
| ENSDARG000000074378  | jun B proto-oncogene a(junba)                                                                    |
| ENSDARG000000104773  | jun B proto-oncogene b(junbb)                                                                    |
| ENSDARG000000043531  | jun proto-oncogene(jun)                                                                          |
| ENSDARG000000035810  | regulator of cell cycle(rgcc)                                                                    |
| ENSDARG000000018334  | ribosomal protein L35(rpl35)                                                                     |
| ENSEMBL_GENE_ID      | GENE NAME                                                                                        |
| ENSDARG000000011170  | NDRG family member 2(ndrg2)                                                                      |
| ENSDARG000000027589  | frizzled class receptor 7b(fzd7b)                                                                |
| ENSDARG000000045444  | frizzled class receptor 8a(fzd8a)                                                                |
| ENSDARG0000000094673 | ras homolog gene family, member Ab(rhoab)                                                        |
| ENSDARG000000041117  | wingless-type MMTV integration site family member 2(wnt2)                                        |
| ENSDARG000000009534  | wntless Wnt ligand secretion mediator(wls)                                                       |
| ENSEMBL_GENE_ID      | GENE NAME                                                                                        |
| ENSDARG000000012656  | activating transcription factor 6(atf6)                                                          |
| ENSDARG000000103846  | heat shock protein 5(hspa5)                                                                      |
| ENSDARG000000003570  | heat shock protein 90, beta (grp94), member 1(hsp90b1)                                           |
| ENSDARG000000100826  | hypoxia-inducible factor 1, alpha subunit, like(hif1al)                                          |
| ENSDARG0000000099351 | insulin-like growth factor binding protein 1a(igfbp1a)                                           |
| ENSDARG000000031952  | myoglobin(mb)                                                                                    |

Biological Process Direct

Regulation of Transcription  
-DNA templated  
(p-value: 4.2E-3)

Transcription from  
polymerasell promoter  
(p-value: 1.6E-2)

Translation  
(p-value: 3.8E-3)

Protein folding  
(p-value: 1.6E-4)

Regulation of Cell Cycle  
(p-value: 4.0E-4)

Wnt signaling  
(p-value: 8.2E-3)

Hypoxia  
(p-value: 1.7E-4)
