# Supplementary material for: scRNA-Seq reveals distinct stem cell populations that drive hair cell regeneration after loss of Fgf and Notch signaling
Source: eLife journal article supplement (doi:10.7554/elife.44431), 2019-01-25
Supplement: supp [file elife-44431-supp-v1.zip › elife_poa_e44431_Supplementary_File_1.xlsx]

## Sheet: threeCells
Ensembl.Gene.ID	Associated.Gene.Name	Gene.name.uniq	ZFIN.ID	Description
ENSDARG00000082753	AC024175.17	AC024175.17	https://zfin.org/
ENSDARG00000081443	AC024175.10	AC024175.10	https://zfin.org/
ENSDARG00000080337	AC024175.4	AC024175.4	https://zfin.org/
ENSDARG00000063895	mt-nd1	mt-nd1	https://zfin.org/ZDB-GENE-011205-7	NADH dehydrogenase 1, mitochondrial [Source:ZFIN;Acc:ZDB-GENE-011205-7]
ENSDARG00000063899	mt-nd2	mt-nd2	https://zfin.org/ZDB-GENE-011205-8	NADH dehydrogenase 2, mitochondrial [Source:ZFIN;Acc:ZDB-GENE-011205-8]
ENSDARG00000080718	AC024175.7	AC024175.7	https://zfin.org/
ENSDARG00000063905	mt-co1	mt-co1	https://zfin.org/ZDB-GENE-011205-14	cytochrome c oxidase I, mitochondrial [Source:ZFIN;Acc:ZDB-GENE-011205-14]
ENSDARG00000063908	mt-co2	mt-co2	https://zfin.org/ZDB-GENE-011205-15	cytochrome c oxidase II, mitochondrial [Source:ZFIN;Acc:ZDB-GENE-011205-15]
ENSDARG00000063910	mt-atp8	mt-atp8	https://zfin.org/ZDB-GENE-011205-19	ATP synthase 8, mitochondrial [Source:ZFIN;Acc:ZDB-GENE-011205-19]
ENSDARG00000063911	mt-atp6	mt-atp6	https://zfin.org/ZDB-GENE-011205-18	ATP synthase 6, mitochondrial [Source:ZFIN;Acc:ZDB-GENE-011205-18]
ENSDARG00000063912	mt-co3	mt-co3	https://zfin.org/ZDB-GENE-011205-16	cytochrome c oxidase III, mitochondrial [Source:ZFIN;Acc:ZDB-GENE-011205-16]
ENSDARG00000063914	mt-nd3	mt-nd3	https://zfin.org/ZDB-GENE-011205-9	NADH dehydrogenase 3, mitochondrial [Source:ZFIN;Acc:ZDB-GENE-011205-9]
ENSDARG00000063916	mt-nd4l	mt-nd4l	https://zfin.org/ZDB-GENE-011205-11	NADH dehydrogenase 4L, mitochondrial [Source:ZFIN;Acc:ZDB-GENE-011205-11]
ENSDARG00000063917	mt-nd4	mt-nd4	https://zfin.org/ZDB-GENE-011205-10	NADH dehydrogenase 4, mitochondrial [Source:ZFIN;Acc:ZDB-GENE-011205-10]
ENSDARG00000082716	AC024175.16	AC024175.16	https://zfin.org/
ENSDARG00000081280	AC024175.8	AC024175.8	https://zfin.org/
ENSDARG00000063921	mt-nd5	mt-nd5	https://zfin.org/ZDB-GENE-011205-12	NADH dehydrogenase 5, mitochondrial [Source:ZFIN;Acc:ZDB-GENE-011205-12]
ENSDARG00000063922	mt-nd6	mt-nd6	https://zfin.org/ZDB-GENE-011205-13	NADH dehydrogenase 6, mitochondrial [Source:ZFIN;Acc:ZDB-GENE-011205-13]
ENSDARG00000063924	mt-cyb	mt-cyb	https://zfin.org/ZDB-GENE-011205-17	cytochrome b, mitochondrial [Source:ZFIN;Acc:ZDB-GENE-011205-17]
ENSDARG00000083462	AC024175.22	AC024175.22	https://zfin.org/
ENSDARG00000028663	tek	tek	https://zfin.org/ZDB-GENE-990415-56	TEK tyrosine kinase, endothelial [Source:ZFIN;Acc:ZDB-GENE-990415-56]
ENSDARG00000075952	mbd2	mbd2	https://zfin.org/ZDB-GENE-030131-9049	methyl-CpG binding domain protein 2 [Source:ZFIN;Acc:ZDB-GENE-030131-9049]
ENSDARG00000032997	rnf185	rnf185	https://zfin.org/ZDB-GENE-040426-1977	ring finger protein 185 [Source:ZFIN;Acc:ZDB-GENE-040426-1977]
ENSDARG00000102788	si:zfos-128g4.1	si:zfos-128g4.1	https://zfin.org/ZDB-GENE-141212-382	si:zfos-128g4.1 [Source:ZFIN;Acc:ZDB-GENE-141212-382]
ENSDARG00000098889	si:zfos-128g4.2	si:zfos-128g4.2	https://zfin.org/ZDB-GENE-141212-308	si:zfos-128g4.2 [Source:ZFIN;Acc:ZDB-GENE-141212-308]
ENSDARG00000089781	ciz1a	ciz1a	https://zfin.org/ZDB-GENE-100922-222	cdkn1a interacting zinc finger protein 1a [Source:ZFIN;Acc:ZDB-GENE-100922-222]
ENSDARG00000038667	fggy	fggy	https://zfin.org/ZDB-GENE-040426-2461	FGGY carbohydrate kinase domain containing [Source:ZFIN;Acc:ZDB-GENE-040426-2461]
ENSDARG00000063197	golga2	golga2	https://zfin.org/ZDB-GENE-081030-1	golgin A2 [Source:ZFIN;Acc:ZDB-GENE-081030-1]
ENSDARG00000102795	tob2	tob2	https://zfin.org/ZDB-GENE-110419-3	transducer of ERBB2, 2 [Source:ZFIN;Acc:ZDB-GENE-110419-3]
ENSDARG00000089355	CSDE1	CSDE1	https://zfin.org/ZDB-GENE-130530-962	si:dkeyp-121d4.3 [Source:ZFIN;Acc:ZDB-GENE-130530-962]
ENSDARG00000098103	tefb	tefb	https://zfin.org/ZDB-GENE-050522-224	thyrotrophic embryonic factor b [Source:ZFIN;Acc:ZDB-GENE-050522-224]
ENSDARG00000057714	cmah	cmah	https://zfin.org/ZDB-GENE-040704-33	cytidine monophospho-N-acetylneuraminic acid hydroxylase [Source:ZFIN;Acc:ZDB-GENE-040704-33]
ENSDARG00000097048	si:ch73-162j3.5	si:ch73-162j3.5	https://zfin.org/ZDB-GENE-131127-439	si:ch73-162j3.5 [Source:ZFIN;Acc:ZDB-GENE-131127-439]
ENSDARG00000078694	PHLPP1	PHLPP1	https://zfin.org/ZDB-GENE-131127-271	si:ch73-40a17.1 [Source:ZFIN;Acc:ZDB-GENE-131127-271]
ENSDARG00000062396	anks1aa	anks1aa	https://zfin.org/ZDB-GENE-090312-152	ankyrin repeat and sterile alpha motif domain containing 1Aa [Source:ZFIN;Acc:ZDB-GENE-090312-152]
ENSDARG00000094332	vgll4a	vgll4a	https://zfin.org/ZDB-GENE-100922-230	vestigial-like family member 4a [Source:ZFIN;Acc:ZDB-GENE-100922-230]
ENSDARG00000045944	slc6a1a	slc6a1a	https://zfin.org/ZDB-GENE-060519-23	solute carrier family 6 (neurotransmitter transporter), member 1a [Source:ZFIN;Acc:ZDB-GENE-060519-23]
ENSDARG00000094523	si:dkey-258p11.1	si:dkey-258p11.1	https://zfin.org/ZDB-GENE-070705-430	si:dkey-258p11.1 [Source:ZFIN;Acc:ZDB-GENE-070705-430]
ENSDARG00000007362	sft2d1	sft2d1	https://zfin.org/ZDB-GENE-040426-1350	SFT2 domain containing 1 [Source:ZFIN;Acc:ZDB-GENE-040426-1350]
ENSDARG00000038360	thg1l	thg1l	https://zfin.org/ZDB-GENE-041114-170	tRNA-histidine guanylyltransferase 1-like [Source:ZFIN;Acc:ZDB-GENE-041114-170]
ENSDARG00000058996	jam2a	jam2a	https://zfin.org/ZDB-GENE-031204-3	junctional adhesion molecule 2a [Source:ZFIN;Acc:ZDB-GENE-031204-3]
ENSDARG00000037855	taf11	taf11	https://zfin.org/ZDB-GENE-040718-283	TAF11 RNA polymerase II, TATA box binding protein (TBP)-associated factor [Source:ZFIN;Acc:ZDB-GENE-040718-283]
ENSDARG00000093768	prr18	prr18	https://zfin.org/ZDB-GENE-081107-6	proline rich 18 [Source:ZFIN;Acc:ZDB-GENE-081107-6]
ENSDARG00000089940	znf1008	znf1008	https://zfin.org/ZDB-GENE-131121-84	zinc finger protein 1008 [Source:ZFIN;Acc:ZDB-GENE-131121-84]
ENSDARG00000041203	drap1	drap1	https://zfin.org/ZDB-GENE-030131-400	DR1-associated protein 1 (negative cofactor 2 alpha) [Source:ZFIN;Acc:ZDB-GENE-030131-400]
ENSDARG00000092778	si:ch73-338o16.4	si:ch73-338o16.4	https://zfin.org/ZDB-GENE-131119-14	si:ch73-338o16.4 [Source:ZFIN;Acc:ZDB-GENE-131119-14]
ENSDARG00000001014	myh9b	myh9b	https://zfin.org/ZDB-GENE-030131-998	myosin, heavy chain 9b, non-muscle [Source:ZFIN;Acc:ZDB-GENE-030131-998]
ENSDARG00000092823	si:dkeyp-67a8.4	si:dkeyp-67a8.4	https://zfin.org/ZDB-GENE-070912-666	si:dkeyp-67a8.4 [Source:ZFIN;Acc:ZDB-GENE-070912-666]
ENSDARG00000058874	zgc:113227	zgc:113227	https://zfin.org/ZDB-GENE-050327-32	zgc:113227 [Source:ZFIN;Acc:ZDB-GENE-050327-32]
ENSDARG00000019406	zgc:63470	zgc:63470	https://zfin.org/ZDB-GENE-040426-1126	zgc:63470 [Source:ZFIN;Acc:ZDB-GENE-040426-1126]
ENSDARG00000097106	si:dkey-245m3.2	si:dkey-245m3.2	https://zfin.org/ZDB-GENE-070705-413	si:dkey-245m3.2 [Source:ZFIN;Acc:ZDB-GENE-070705-413]
ENSDARG00000074146	zgc:113452	zgc:113452	https://zfin.org/ZDB-GENE-131121-84	zgc:113452 [Source:ZFIN;Acc:ZDB-GENE-050913-16]
ENSDARG00000090099	si:dkeyp-67a8.4	si:dkeyp-67a8.4.1	https://zfin.org/ZDB-GENE-070912-666	si:dkeyp-67a8.4 [Source:ZFIN;Acc:ZDB-GENE-070912-666]
ENSDARG00000096411	wu:fc32g12	wu:fc32g12	https://zfin.org/ZDB-GENE-030131-3280	wu:fc32g12 [Source:ZFIN;Acc:ZDB-GENE-030131-3280]
ENSDARG00000004843	foxp1a	foxp1a	https://zfin.org/ZDB-GENE-060929-624	forkhead box P1a [Source:ZFIN;Acc:ZDB-GENE-060929-624]
ENSDARG00000098696	rela	rela	https://zfin.org/ZDB-GENE-040825-4	v-rel avian reticuloendotheliosis viral oncogene homolog A [Source:ZFIN;Acc:ZDB-GENE-040825-4]
ENSDARG00000097884	si:ch73-40a17.7	si:ch73-40a17.7	https://zfin.org/ZDB-GENE-131121-52	si:ch73-40a17.7 [Source:ZFIN;Acc:ZDB-GENE-131121-52]
ENSDARG00000058369	mex3b	mex3b	https://zfin.org/ZDB-GENE-030131-2628	mex-3 RNA binding family member B [Source:ZFIN;Acc:ZDB-GENE-030131-2628]
ENSDARG00000102216	dlg1l	dlg1l	https://zfin.org/ZDB-GENE-050222-3	discs, large (Drosophila) homolog 1, like [Source:ZFIN;Acc:ZDB-GENE-050222-3]
ENSDARG00000104831	CEP192	CEP192	https://zfin.org/ZDB-GENE-100922-163	si:rp71-15i12.1 [Source:ZFIN;Acc:ZDB-GENE-100922-163]
ENSDARG00000051783	rplp0	rplp0	https://zfin.org/ZDB-GENE-000629-1	ribosomal protein, large, P0 [Source:ZFIN;Acc:ZDB-GENE-000629-1]
ENSDARG00000097244	zgc:174263	zgc:174263	https://zfin.org/ZDB-GENE-030131-4589	zgc:174263 [Source:ZFIN;Acc:ZDB-GENE-030131-4589]
ENSDARG00000051785	dhx33	dhx33	https://zfin.org/ZDB-GENE-131127-77	DEAH (Asp-Glu-Ala-His) box polypeptide 33 [Source:ZFIN;Acc:ZDB-GENE-131127-77]
ENSDARG00000097550	si:ch211-160e1.9	si:ch211-160e1.9	https://zfin.org/ZDB-GENE-131127-396	si:ch211-160e1.9 [Source:ZFIN;Acc:ZDB-GENE-131127-396]
ENSDARG00000097118	si:dkey-33c14.3	si:dkey-33c14.3	https://zfin.org/ZDB-GENE-131121-627	si:dkey-33c14.3 [Source:ZFIN;Acc:ZDB-GENE-131121-627]
ENSDARG00000094300	NUPR2	NUPR2	https://zfin.org/ZDB-GENE-070705-255	si:ch211-160e1.5 [Source:ZFIN;Acc:ZDB-GENE-070705-255]
ENSDARG00000026759	ldlrb	ldlrb	https://zfin.org/ZDB-GENE-040426-1254	low density lipoprotein receptor b [Source:ZFIN;Acc:ZDB-GENE-040426-1254]
ENSDARG00000019360	sec23b	sec23b	https://zfin.org/ZDB-GENE-030131-5479	Sec23 homolog B, COPII coat complex component [Source:ZFIN;Acc:ZDB-GENE-030131-5479]
ENSDARG00000043644	vkorc1l1	vkorc1l1	https://zfin.org/ZDB-GENE-050522-210	vitamin K epoxide reductase complex, subunit 1-like 1 [Source:ZFIN;Acc:ZDB-GENE-050522-210]
ENSDARG00000076995	sharpin	sharpin	https://zfin.org/ZDB-GENE-101223-1	SHANK-associated RH domain interacting protein [Source:ZFIN;Acc:ZDB-GENE-101223-1]
ENSDARG00000009982	fam199x	fam199x	https://zfin.org/ZDB-GENE-040808-24	family with sequence similarity 199, X-linked [Source:ZFIN;Acc:ZDB-GENE-040808-24]
ENSDARG00000013726	ap4b1	ap4b1	https://zfin.org/ZDB-GENE-040426-1284	adaptor-related protein complex 4, beta 1 subunit [Source:ZFIN;Acc:ZDB-GENE-040426-1284]
ENSDARG00000063126	gusb	gusb	https://zfin.org/ZDB-GENE-070705-256	glucuronidase, beta [Source:ZFIN;Acc:ZDB-GENE-070705-256]
ENSDARG00000003449	pde10a	pde10a	https://zfin.org/ZDB-GENE-040426-1115	phosphodiesterase 10A [Source:ZFIN;Acc:ZDB-GENE-040426-1115]
ENSDARG00000037852	zgc:101663	zgc:101663	https://zfin.org/ZDB-GENE-041114-149	zgc:101663 [Source:ZFIN;Acc:ZDB-GENE-041114-149]
ENSDARG00000096919	si:dkey-245m3.3	si:dkey-245m3.3	https://zfin.org/ZDB-GENE-070705-414	si:dkey-245m3.3 [Source:ZFIN;Acc:ZDB-GENE-070705-414]
ENSDARG00000097391	si:dkey-33c14.7	si:dkey-33c14.7	https://zfin.org/ZDB-GENE-131127-528	si:dkey-33c14.7 [Source:ZFIN;Acc:ZDB-GENE-131127-528]
ENSDARG00000002670	ATG14	ATG14	https://zfin.org/ZDB-GENE-050913-155	zgc:113944 [Source:ZFIN;Acc:ZDB-GENE-050913-155]
ENSDARG00000011246	krr1	krr1	https://zfin.org/ZDB-GENE-060623-10	KRR1, small subunit (SSU) processome component, homolog (yeast) [Source:ZFIN;Acc:ZDB-GENE-060623-10]
ENSDARG00000076386	epdl1	epdl1	https://zfin.org/ZDB-GENE-090710-3	ependymin-like 1 [Source:ZFIN;Acc:ZDB-GENE-090710-3]
ENSDARG00000103253	zgc:112023	zgc:112023	https://zfin.org/ZDB-GENE-050417-162	zgc:112023 [Source:ZFIN;Acc:ZDB-GENE-050417-162]
ENSDARG00000013749	zgc:92113	zgc:92113	https://zfin.org/ZDB-GENE-040801-184	zgc:92113 [Source:ZFIN;Acc:ZDB-GENE-040801-184]
ENSDARG00000100660	ZC3HAV1	ZC3HAV1	https://zfin.org/ZDB-GENE-141210-7	si:ch73-252i11.1 [Source:ZFIN;Acc:ZDB-GENE-141210-7]
ENSDARG00000075884	shprh	shprh	https://zfin.org/ZDB-GENE-110512-2	SNF2 histone linker PHD RING helicase [Source:ZFIN;Acc:ZDB-GENE-110512-2]
ENSDARG00000079672	eftud1	eftud1	https://zfin.org/ZDB-GENE-130103-6	elongation factor Tu GTP binding domain containing 1 [Source:ZFIN;Acc:ZDB-GENE-130103-6]
ENSDARG00000104632	si:ch73-252i11.3	si:ch73-252i11.3	https://zfin.org/ZDB-GENE-141212-350	si:ch73-252i11.3 [Source:ZFIN;Acc:ZDB-GENE-141212-350]
ENSDARG00000018351	hpda	hpda	https://zfin.org/ZDB-GENE-040426-986	4-hydroxyphenylpyruvate dioxygenase a [Source:ZFIN;Acc:ZDB-GENE-040426-986]
ENSDARG00000014313	atp5j	atp5j	https://zfin.org/ZDB-GENE-040426-2534	ATP synthase, H+ transporting, mitochondrial Fo complex, subunit F6 [Source:ZFIN;Acc:ZDB-GENE-040426-2534]
ENSDARG00000018508	zdhhc8b	zdhhc8b	https://zfin.org/ZDB-GENE-030407-3	zinc finger, DHHC-type containing 8b [Source:ZFIN;Acc:ZDB-GENE-030407-3]
ENSDARG00000005218	wrnip1	wrnip1	https://zfin.org/ZDB-GENE-040426-2415	Werner helicase interacting protein 1 [Source:ZFIN;Acc:ZDB-GENE-040426-2415]
ENSDARG00000015662	pla2g12b	pla2g12b	https://zfin.org/ZDB-GENE-040426-2771	phospholipase A2, group XIIB [Source:ZFIN;Acc:ZDB-GENE-040426-2771]
ENSDARG00000059202	tspan2b	tspan2b	https://zfin.org/ZDB-GENE-100922-60	tetraspanin 2b [Source:ZFIN;Acc:ZDB-GENE-100922-60]
ENSDARG00000029660	commd5	commd5	https://zfin.org/ZDB-GENE-040801-71	COMM domain containing 5 [Source:ZFIN;Acc:ZDB-GENE-040801-71]
ENSDARG00000020204	nf2a	nf2a	https://zfin.org/ZDB-GENE-080722-7	neurofibromin 2a (merlin) [Source:ZFIN;Acc:ZDB-GENE-080722-7]
ENSDARG00000037998	flot1b	flot1b	https://zfin.org/ZDB-GENE-020430-2	flotillin 1b [Source:ZFIN;Acc:ZDB-GENE-020430-2]
ENSDARG00000092493	si:dkeyp-44a8.2	si:dkeyp-44a8.2	https://zfin.org/ZDB-GENE-070705-542	si:dkeyp-44a8.2 [Source:ZFIN;Acc:ZDB-GENE-070705-542]
ENSDARG00000062872	mrs2	mrs2	https://zfin.org/ZDB-GENE-141211-29	MRS2 magnesium transporter [Source:ZFIN;Acc:ZDB-GENE-141211-29]
ENSDARG00000063162	cmtm8b	cmtm8b	https://zfin.org/ZDB-GENE-070112-1312	CKLF-like MARVEL transmembrane domain containing 8b [Source:ZFIN;Acc:ZDB-GENE-070112-1312]
ENSDARG00000041417	atp6ap1a	atp6ap1a	https://zfin.org/ZDB-GENE-090312-136	ATPase, H+ transporting, lysosomal accessory protein 1a [Source:ZFIN;Acc:ZDB-GENE-090312-136]
ENSDARG00000071259	fbxo34	fbxo34	https://zfin.org/ZDB-GENE-030131-2194	F-box protein 34 [Source:ZFIN;Acc:ZDB-GENE-030131-2194]
ENSDARG00000098941	si:ch73-57a19.4	si:ch73-57a19.4	https://zfin.org/ZDB-GENE-141216-377	si:ch73-57a19.4 [Source:ZFIN;Acc:ZDB-GENE-141216-377]
ENSDARG00000039719	mrps26	mrps26	https://zfin.org/ZDB-GENE-040718-115	mitochondrial ribosomal protein S26 [Source:ZFIN;Acc:ZDB-GENE-040718-115]
ENSDARG00000016163	usp33	usp33	https://zfin.org/ZDB-GENE-040426-2323	ubiquitin specific peptidase 33 [Source:ZFIN;Acc:ZDB-GENE-040426-2323]
ENSDARG00000070441	zdhhc17	zdhhc17	https://zfin.org/ZDB-GENE-070424-194	zinc finger, DHHC-type containing 17 [Source:ZFIN;Acc:ZDB-GENE-070424-194]
ENSDARG00000076611	fbxo21	fbxo21	https://zfin.org/ZDB-GENE-100922-229	F-box protein 21 [Source:ZFIN;Acc:ZDB-GENE-100922-229]
ENSDARG00000071159	SFT2D2	SFT2D2	https://zfin.org/ZDB-GENE-050522-336	zgc:112392 [Source:ZFIN;Acc:ZDB-GENE-050522-336]
ENSDARG00000074634	keap1b	keap1b	https://zfin.org/ZDB-GENE-080508-1	kelch-like ECH-associated protein 1b [Source:ZFIN;Acc:ZDB-GENE-080508-1]
ENSDARG00000101175	mcu	mcu	https://zfin.org/ZDB-GENE-061013-24	mitochondrial calcium uniporter [Source:ZFIN;Acc:ZDB-GENE-061013-24]
ENSDARG00000005078	eif4e3	eif4e3	https://zfin.org/ZDB-GENE-040912-156	eukaryotic translation initiation factor 4E family member 3 [Source:ZFIN;Acc:ZDB-GENE-040912-156]
ENSDARG00000099309	si:zfos-169g10.3	si:zfos-169g10.3	https://zfin.org/ZDB-GENE-120215-190	si:zfos-169g10.3 [Source:ZFIN;Acc:ZDB-GENE-120215-190]
ENSDARG00000103984	cyth4b	cyth4b	https://zfin.org/ZDB-GENE-080219-45	cytohesin 4b [Source:ZFIN;Acc:ZDB-GENE-080219-45]
ENSDARG00000096454	ap1m2	ap1m2	https://zfin.org/ZDB-GENE-041114-20	adaptor-related protein complex 1, mu 2 subunit [Source:ZFIN;Acc:ZDB-GENE-041114-20]
ENSDARG00000057881	si:dkey-33c12.3	si:dkey-33c12.3	https://zfin.org/ZDB-GENE-030131-7320	si:dkey-33c12.3 [Source:ZFIN;Acc:ZDB-GENE-030131-7320]
ENSDARG00000104279	appa	appa	https://zfin.org/ZDB-GENE-000616-13	amyloid beta (A4) precursor protein a [Source:ZFIN;Acc:ZDB-GENE-000616-13]
ENSDARG00000057907	si:ch73-181d5.4	si:ch73-181d5.4	https://zfin.org/ZDB-GENE-100922-118	si:ch73-181d5.4 [Source:ZFIN;Acc:ZDB-GENE-100922-118]
ENSDARG00000067626	ywhag1	ywhag1	https://zfin.org/ZDB-GENE-011115-1	3-monooxygenase/tryptophan 5-monooxygenase activation protein, gamma polypeptide 1 [Source:ZFIN;Acc:ZDB-GENE-011115-1]
ENSDARG00000044001	lgals3l	lgals3l	https://zfin.org/ZDB-GENE-030131-4324	lectin, galactoside-binding, soluble, 3 (galectin 3)-like [Source:ZFIN;Acc:ZDB-GENE-030131-4324]
ENSDARG00000063358	micu1	micu1	https://zfin.org/ZDB-GENE-070410-22	mitochondrial calcium uptake 1 [Source:ZFIN;Acc:ZDB-GENE-070410-22]
ENSDARG00000019743	dctn1a	dctn1a	https://zfin.org/ZDB-GENE-070117-2205	dynactin 1a [Source:ZFIN;Acc:ZDB-GENE-070117-2205]
ENSDARG00000037773	rybpa	rybpa	https://zfin.org/ZDB-GENE-030424-3	RING1 and YY1 binding protein a [Source:ZFIN;Acc:ZDB-GENE-030424-3]
ENSDARG00000041314	ndufb9	ndufb9	https://zfin.org/ZDB-GENE-030131-8364	NADH dehydrogenase (ubiquinone) 1 beta subcomplex, 9 [Source:ZFIN;Acc:ZDB-GENE-030131-8364]
ENSDARG00000037639	nkx3.2	nkx3.2	https://zfin.org/ZDB-GENE-030127-1	NK3 homeobox 2 [Source:ZFIN;Acc:ZDB-GENE-030127-1]
ENSDARG00000101032	iqcb1	iqcb1	https://zfin.org/ZDB-GENE-041212-47	IQ motif containing B1 [Source:ZFIN;Acc:ZDB-GENE-041212-47]
ENSDARG00000041065	hspb1	hspb1	https://zfin.org/ZDB-GENE-030326-4	heat shock protein, alpha-crystallin-related, 1 [Source:ZFIN;Acc:ZDB-GENE-030326-4]
ENSDARG00000028346	tesca	tesca	https://zfin.org/ZDB-GENE-040426-2632	tescalcin a [Source:ZFIN;Acc:ZDB-GENE-040426-2632]
ENSDARG00000100422	ptpro	ptpro	https://zfin.org/ZDB-GENE-070424-54	protein tyrosine phosphatase, receptor type, O [Source:ZFIN;Acc:ZDB-GENE-070424-54]
ENSDARG00000077581	zzz3	zzz3	https://zfin.org/ZDB-GENE-030131-6450	zinc finger, ZZ-type containing 3 [Source:ZFIN;Acc:ZDB-GENE-030131-6450]
ENSDARG00000055498	FAM132B	FAM132B	https://zfin.org/ZDB-GENE-081104-74	si:ch1073-184j22.1 [Source:ZFIN;Acc:ZDB-GENE-081104-74]
ENSDARG00000034777	txn2	txn2	https://zfin.org/ZDB-GENE-040426-1795	thioredoxin 2 [Source:ZFIN;Acc:ZDB-GENE-040426-1795]
ENSDARG00000013058	ascc2	ascc2	https://zfin.org/ZDB-GENE-040426-1223	activating signal cointegrator 1 complex subunit 2 [Source:ZFIN;Acc:ZDB-GENE-040426-1223]
ENSDARG00000037846	hm13	hm13	https://zfin.org/ZDB-GENE-020802-3	histocompatibility (minor) 13 [Source:ZFIN;Acc:ZDB-GENE-020802-3]
ENSDARG00000039852	ftr93	ftr93	https://zfin.org/ZDB-GENE-131126-26	finTRIM family, member 93 [Source:ZFIN;Acc:ZDB-GENE-131126-26]
ENSDARG00000026540	ppp4r2a	ppp4r2a	https://zfin.org/ZDB-GENE-030131-4922	protein phosphatase 4, regulatory subunit 2a [Source:ZFIN;Acc:ZDB-GENE-030131-4922]
ENSDARG00000089505	bod1l1	bod1l1	https://zfin.org/ZDB-GENE-111028-1	biorientation of chromosomes in cell division 1-like 1 [Source:ZFIN;Acc:ZDB-GENE-111028-1]
ENSDARG00000053019	rnft2	rnft2	https://zfin.org/ZDB-GENE-050522-168	ring finger protein, transmembrane 2 [Source:ZFIN;Acc:ZDB-GENE-050522-168]
ENSDARG00000096920	SRRM4	SRRM4	https://zfin.org/ZDB-GENE-131121-284	si:zfos-375h5.1 [Source:ZFIN;Acc:ZDB-GENE-131121-284]
ENSDARG00000078315	zgc:110063	zgc:110063	https://zfin.org/ZDB-GENE-050522-367	zgc:110063 [Source:ZFIN;Acc:ZDB-GENE-050522-367]
ENSDARG00000093612	si:dkey-92i17.2	si:dkey-92i17.2	https://zfin.org/ZDB-GENE-030131-6759	si:dkey-92i17.2 [Source:ZFIN;Acc:ZDB-GENE-030131-6759]
ENSDARG00000059741	alpk1	alpk1	https://zfin.org/ZDB-GENE-140106-68	alpha-kinase 1 [Source:ZFIN;Acc:ZDB-GENE-140106-68]
ENSDARG00000029356	mboat1	mboat1	https://zfin.org/ZDB-GENE-041114-98	membrane bound O-acyltransferase domain containing 1 [Source:ZFIN;Acc:ZDB-GENE-041114-98]
ENSDARG00000096963	si:ch211-185a18.2	si:ch211-185a18.2	https://zfin.org/
ENSDARG00000004297	irf2bpl	irf2bpl	https://zfin.org/ZDB-GENE-040426-1968	interferon regulatory factor 2 binding protein-like [Source:ZFIN;Acc:ZDB-GENE-040426-1968]
ENSDARG00000102128	eps8	eps8	https://zfin.org/ZDB-GENE-040426-871	epidermal growth factor receptor pathway substrate 8 [Source:ZFIN;Acc:ZDB-GENE-040426-871]
ENSDARG00000041421	taz	taz	https://zfin.org/ZDB-GENE-030131-684	tafazzin [Source:ZFIN;Acc:ZDB-GENE-030131-684]
ENSDARG00000030896	foxq1a	foxq1a	https://zfin.org/ZDB-GENE-070424-74	forkhead box Q1a [Source:ZFIN;Acc:ZDB-GENE-070424-74]
ENSDARG00000013741	lancl1	lancl1	https://zfin.org/ZDB-GENE-040924-1	LanC antibiotic synthetase component C-like 1 (bacterial) [Source:ZFIN;Acc:ZDB-GENE-040924-1]
ENSDARG00000037640	aurkb	aurkb	https://zfin.org/ZDB-GENE-020419-40	aurora kinase B [Source:ZFIN;Acc:ZDB-GENE-020419-40]
ENSDARG00000017441	mylz3	mylz3	https://zfin.org/ZDB-GENE-000322-6	myosin, light polypeptide 3, skeletal muscle [Source:ZFIN;Acc:ZDB-GENE-000322-6]
ENSDARG00000024561	nolc1	nolc1	https://zfin.org/ZDB-GENE-030131-6349	nucleolar and coiled-body phosphoprotein 1 [Source:ZFIN;Acc:ZDB-GENE-030131-6349]
ENSDARG00000057890	TTC31	TTC31	https://zfin.org/ZDB-GENE-030131-2527	si:dkey-33c12.4 [Source:ZFIN;Acc:ZDB-GENE-030131-2527]
ENSDARG00000075737	A2ML1	A2ML1	https://zfin.org/ZDB-GENE-070720-15	zgc:165518 [Source:ZFIN;Acc:ZDB-GENE-070720-15]
ENSDARG00000035221	zgc:110249	zgc:110249	https://zfin.org/ZDB-GENE-050522-331	zgc:110249 [Source:ZFIN;Acc:ZDB-GENE-050522-331]
ENSDARG00000063021	rpain	rpain	https://zfin.org/ZDB-GENE-060825-212	RPA interacting protein [Source:ZFIN;Acc:ZDB-GENE-060825-212]
ENSDARG00000058561	fbxo30a	fbxo30a	https://zfin.org/ZDB-GENE-040426-1215	F-box protein 30a [Source:ZFIN;Acc:ZDB-GENE-040426-1215]
ENSDARG00000011961	csrp2	csrp2	https://zfin.org/ZDB-GENE-040426-1863	cysteine and glycine-rich protein 2 [Source:ZFIN;Acc:ZDB-GENE-040426-1863]
ENSDARG00000098734	ccdc14	ccdc14	https://zfin.org/ZDB-GENE-120215-134	coiled-coil domain containing 14 [Source:ZFIN;Acc:ZDB-GENE-120215-134]
ENSDARG00000012555	ak5	ak5	https://zfin.org/ZDB-GENE-030131-8256	adenylate kinase 5 [Source:ZFIN;Acc:ZDB-GENE-030131-8256]
ENSDARG00000058958	TRIM35	TRIM35	https://zfin.org/ZDB-GENE-131119-18	si:ch73-106l15.3 [Source:ZFIN;Acc:ZDB-GENE-131119-18]
ENSDARG00000070284	sft2d3	sft2d3	https://zfin.org/ZDB-GENE-070907-1	SFT2 domain containing 3 [Source:ZFIN;Acc:ZDB-GENE-070907-1]
ENSDARG00000089372	clk4a	clk4a	https://zfin.org/ZDB-GENE-030131-576	CDC-like kinase 4a [Source:ZFIN;Acc:ZDB-GENE-030131-576]
ENSDARG00000037997	tubb5	tubb5	https://zfin.org/ZDB-GENE-031110-4	tubulin, beta 5 [Source:ZFIN;Acc:ZDB-GENE-031110-4]
ENSDARG00000013360	sh3gl3a	sh3gl3a	https://zfin.org/ZDB-GENE-070112-242	SH3-domain GRB2-like 3a [Source:ZFIN;Acc:ZDB-GENE-070112-242]
ENSDARG00000059150	tmem107	tmem107	https://zfin.org/ZDB-GENE-040426-2294	transmembrane protein 107 [Source:ZFIN;Acc:ZDB-GENE-040426-2294]
ENSDARG00000041619	gnb2l1	gnb2l1	https://zfin.org/ZDB-GENE-990415-89	guanine nucleotide binding protein (G protein), beta polypeptide 2-like 1 [Source:ZFIN;Acc:ZDB-GENE-990415-89]
ENSDARG00000101180	mcm7	mcm7	https://zfin.org/ZDB-GENE-020419-27	minichromosome maintenance complex component 7 [Source:ZFIN;Acc:ZDB-GENE-020419-27]
ENSDARG00000099828	gatsl3	gatsl3	https://zfin.org/
ENSDARG00000090965	ripk3	ripk3	https://zfin.org/ZDB-GENE-071115-4	receptor-interacting serine-threonine kinase 3 [Source:ZFIN;Acc:ZDB-GENE-071115-4]
ENSDARG00000015551	fth1a	fth1a	https://zfin.org/ZDB-GENE-000831-2	ferritin, heavy polypeptide 1a [Source:ZFIN;Acc:ZDB-GENE-000831-2]
ENSDARG00000039887	c1qbp	c1qbp	https://zfin.org/ZDB-GENE-050417-408	complement component 1, q subcomponent binding protein [Source:ZFIN;Acc:ZDB-GENE-050417-408]
ENSDARG00000059424	rnf215	rnf215	https://zfin.org/ZDB-GENE-060526-65	ring finger protein 215 [Source:ZFIN;Acc:ZDB-GENE-060526-65]
ENSDARG00000041617	nme5	nme5	https://zfin.org/ZDB-GENE-040718-221	NME/NM23 family member 5 [Source:ZFIN;Acc:ZDB-GENE-040718-221]
ENSDARG00000086764	MDC1	MDC1	https://zfin.org/ZDB-GENE-060810-185	si:ch73-309n4.5 [Source:ZFIN;Acc:ZDB-GENE-060810-185]
ENSDARG00000092488	khnyn	khnyn	https://zfin.org/ZDB-GENE-141215-64	KH and NYN domain containing [Source:ZFIN;Acc:ZDB-GENE-141215-64]
ENSDARG00000104024	ccdc137	ccdc137	https://zfin.org/ZDB-GENE-060929-1206	coiled-coil domain containing 137 [Source:ZFIN;Acc:ZDB-GENE-060929-1206]
ENSDARG00000039543	mrps6	mrps6	https://zfin.org/ZDB-GENE-060825-59	mitochondrial ribosomal protein S6 [Source:ZFIN;Acc:ZDB-GENE-060825-59]
ENSDARG00000043865	timm9	timm9	https://zfin.org/ZDB-GENE-021206-14	translocase of inner mitochondrial membrane 9 homolog [Source:ZFIN;Acc:ZDB-GENE-021206-14]
ENSDARG00000024479	pigk	pigk	https://zfin.org/ZDB-GENE-040625-162	phosphatidylinositol glycan anchor biosynthesis, class K [Source:ZFIN;Acc:ZDB-GENE-040625-162]
ENSDARG00000018272	wdr33	wdr33	https://zfin.org/ZDB-GENE-040924-3	WD repeat domain 33 [Source:ZFIN;Acc:ZDB-GENE-040924-3]
ENSDARG00000088686	HIST2H2AB	HIST2H2AB	https://zfin.org/ZDB-GENE-081205-1	zgc:195633 [Source:ZFIN;Acc:ZDB-GENE-081205-1]
ENSDARG00000011201	rplp2l	rplp2l	https://zfin.org/ZDB-GENE-070327-2	ribosomal protein, large P2, like [Source:ZFIN;Acc:ZDB-GENE-070327-2]
ENSDARG00000044038	zbtb2a	zbtb2a	https://zfin.org/ZDB-GENE-040426-726	zinc finger and BTB domain containing 2a [Source:ZFIN;Acc:ZDB-GENE-040426-726]
ENSDARG00000043031	ints10	ints10	https://zfin.org/ZDB-GENE-050522-2	integrator complex subunit 10 [Source:ZFIN;Acc:ZDB-GENE-050522-2]
ENSDARG00000020527	nup62l	nup62l	https://zfin.org/ZDB-GENE-030131-8491	nucleoporin 62 like [Source:ZFIN;Acc:ZDB-GENE-030131-8491]
ENSDARG00000103819	si:dkey-23a13.4	si:dkey-23a13.4	https://zfin.org/ZDB-GENE-160113-66	si:dkey-23a13.4 [Source:ZFIN;Acc:ZDB-GENE-160113-66]
ENSDARG00000096346	si:ch211-85n16.3	si:ch211-85n16.3	https://zfin.org/ZDB-GENE-120215-137	si:ch211-85n16.3 [Source:ZFIN;Acc:ZDB-GENE-120215-137]
ENSDARG00000098578	pdgfab	pdgfab	https://zfin.org/ZDB-GENE-060929-124	platelet-derived growth factor alpha polypeptide b [Source:ZFIN;Acc:ZDB-GENE-060929-124]
ENSDARG00000099514	zgc:171759	zgc:171759	https://zfin.org/ZDB-GENE-071004-32	zgc:171759 [Source:ZFIN;Acc:ZDB-GENE-071004-32]
ENSDARG00000105314	si:dkey-23a13.6	si:dkey-23a13.6	https://zfin.org/ZDB-GENE-160113-107	si:dkey-23a13.6 [Source:ZFIN;Acc:ZDB-GENE-160113-107]
ENSDARG00000074779	alms1	alms1	https://zfin.org/ZDB-GENE-030131-4837	Alstrom syndrome protein 1 [Source:ZFIN;Acc:ZDB-GENE-030131-4837]
ENSDARG00000100850	rnf103	rnf103	https://zfin.org/ZDB-GENE-040912-171	ring finger protein 103 [Source:ZFIN;Acc:ZDB-GENE-040912-171]
ENSDARG00000040912	kdelr3	kdelr3	https://zfin.org/ZDB-GENE-040426-1387	KDEL (Lys-Asp-Glu-Leu) endoplasmic reticulum protein retention receptor 3 [Source:ZFIN;Acc:ZDB-GENE-040426-1387]
ENSDARG00000104825	trim35-7	trim35-7	https://zfin.org/ZDB-GENE-050522-333	tripartite motif containing 35-7 [Source:ZFIN;Acc:ZDB-GENE-050522-333]
ENSDARG00000014825	ZNF865	ZNF865	https://zfin.org/ZDB-GENE-100922-227	si:dkeyp-69b9.6 [Source:ZFIN;Acc:ZDB-GENE-100922-227]
ENSDARG00000008986	e2f7	e2f7	https://zfin.org/ZDB-GENE-030131-3527	E2F transcription factor 7 [Source:ZFIN;Acc:ZDB-GENE-030131-3527]
ENSDARG00000056233	TMEM179B	TMEM179B	https://zfin.org/ZDB-GENE-050522-510	zgc:110591 [Source:ZFIN;Acc:ZDB-GENE-050522-510]
ENSDARG00000039850	dusp22b	dusp22b	https://zfin.org/ZDB-GENE-050417-257	dual specificity phosphatase 22b [Source:ZFIN;Acc:ZDB-GENE-050417-257]
ENSDARG00000058473	st6galnac3	st6galnac3	https://zfin.org/ZDB-GENE-030131-1329	ST6 (alpha-N-acetyl-neuraminyl-2,3-beta-galactosyl-1,3)-N-acetylgalactosaminide alpha-2,6-sialyltransferase 3 [Source:ZFIN;Acc:ZDB-GENE-030131-1329]
ENSDARG00000097256	si:ch211-270g19.5	si:ch211-270g19.5	https://zfin.org/ZDB-GENE-131121-121	si:ch211-270g19.5 [Source:ZFIN;Acc:ZDB-GENE-131121-121]
ENSDARG00000105352	si:dkey-23a13.7	si:dkey-23a13.7	https://zfin.org/ZDB-GENE-160113-88	si:dkey-23a13.7 [Source:ZFIN;Acc:ZDB-GENE-160113-88]
ENSDARG00000039268	emc4	emc4	https://zfin.org/ZDB-GENE-040426-1891	ER membrane protein complex subunit 4 [Source:ZFIN;Acc:ZDB-GENE-040426-1891]
ENSDARG00000090872	si:dkey-276j7.1	si:dkey-276j7.1	https://zfin.org/ZDB-GENE-060720-44	si:dkey-276j7.1 [Source:ZFIN;Acc:ZDB-GENE-060720-44]
ENSDARG00000013434	hira	hira	https://zfin.org/ZDB-GENE-030131-6296	histone cell cycle regulator a [Source:ZFIN;Acc:ZDB-GENE-030131-6296]
ENSDARG00000023950	znhit3	znhit3	https://zfin.org/ZDB-GENE-040426-1114	zinc finger, HIT-type containing 3 [Source:ZFIN;Acc:ZDB-GENE-040426-1114]
ENSDARG00000102874	immt	immt	https://zfin.org/ZDB-GENE-030131-5417	inner membrane protein, mitochondrial (mitofilin) [Source:ZFIN;Acc:ZDB-GENE-030131-5417]
ENSDARG00000103800	prkar1b	prkar1b	https://zfin.org/ZDB-GENE-060929-580	protein kinase, cAMP-dependent, regulatory, type I, beta [Source:ZFIN;Acc:ZDB-GENE-060929-580]
ENSDARG00000013968	psap	psap	https://zfin.org/ZDB-GENE-020108-1	prosaposin [Source:ZFIN;Acc:ZDB-GENE-020108-1]
ENSDARG00000103095	tbk1	tbk1	https://zfin.org/ZDB-GENE-060512-359	TANK-binding kinase 1 [Source:ZFIN;Acc:ZDB-GENE-060512-359]
ENSDARG00000034138	shisa2	shisa2	https://zfin.org/ZDB-GENE-030925-31	shisa family member 2 [Source:ZFIN;Acc:ZDB-GENE-030925-31]
ENSDARG00000022939	ino80e	ino80e	https://zfin.org/ZDB-GENE-040426-1818	INO80 complex subunit E [Source:ZFIN;Acc:ZDB-GENE-040426-1818]
ENSDARG00000071288	samhd1	samhd1	https://zfin.org/ZDB-GENE-090313-386	SAM domain and HD domain 1 [Source:ZFIN;Acc:ZDB-GENE-090313-386]
ENSDARG00000105397	HIST1H2BA	HIST1H2BA	https://zfin.org/ZDB-GENE-160113-110	si:dkey-23a13.8 [Source:ZFIN;Acc:ZDB-GENE-160113-110]
ENSDARG00000003381	si:ch211-266g18.6	si:ch211-266g18.6	https://zfin.org/ZDB-GENE-131121-599	si:ch211-266g18.6 [Source:ZFIN;Acc:ZDB-GENE-131121-599]
ENSDARG00000002635	FAM184A	FAM184A	https://zfin.org/ZDB-GENE-040516-7	zgc:85722 [Source:ZFIN;Acc:ZDB-GENE-040516-7]
ENSDARG00000027465	rmnd1	rmnd1	https://zfin.org/ZDB-GENE-050522-21	required for meiotic nuclear division 1 homolog [Source:ZFIN;Acc:ZDB-GENE-050522-21]
ENSDARG00000077881	chl1a	chl1a	https://zfin.org/ZDB-GENE-090313-201	cell adhesion molecule L1-like a [Source:ZFIN;Acc:ZDB-GENE-090313-201]
ENSDARG00000088820	znf1134	znf1134	https://zfin.org/
ENSDARG00000044628	dtd1	dtd1	https://zfin.org/ZDB-GENE-040801-175	D-tyrosyl-tRNA deacylase 1 [Source:ZFIN;Acc:ZDB-GENE-040801-175]
ENSDARG00000098717	arhgap11a	arhgap11a	https://zfin.org/
ENSDARG00000008969	fgb	fgb	https://zfin.org/ZDB-GENE-030131-9261	fibrinogen beta chain [Source:ZFIN;Acc:ZDB-GENE-030131-9261]
ENSDARG00000018562	cope	cope	https://zfin.org/ZDB-GENE-041114-59	coatomer protein complex, subunit epsilon [Source:ZFIN;Acc:ZDB-GENE-041114-59]
ENSDARG00000058961	ngfa	ngfa	https://zfin.org/ZDB-GENE-990415-176	nerve growth factor a (beta polypeptide) [Source:ZFIN;Acc:ZDB-GENE-990415-176]
ENSDARG00000079244	pigw	pigw	https://zfin.org/ZDB-GENE-080204-94	phosphatidylinositol glycan anchor biosynthesis, class W [Source:ZFIN;Acc:ZDB-GENE-080204-94]
ENSDARG00000105431	si:dkey-23a13.9	si:dkey-23a13.9	https://zfin.org/ZDB-GENE-160113-29	si:dkey-23a13.9 [Source:ZFIN;Acc:ZDB-GENE-160113-29]
ENSDARG00000062924	BBOF1	BBOF1	https://zfin.org/ZDB-GENE-070424-167	si:ch211-243o19.4 [Source:ZFIN;Acc:ZDB-GENE-070424-167]
ENSDARG00000079613	sall3a	sall3a	https://zfin.org/ZDB-GENE-020228-4	spalt-like transcription factor 3a [Source:ZFIN;Acc:ZDB-GENE-020228-4]
ENSDARG00000101435	lgr6	lgr6	https://zfin.org/ZDB-GENE-110411-186	leucine-rich repeat containing G protein-coupled receptor 6 [Source:ZFIN;Acc:ZDB-GENE-110411-186]
ENSDARG00000100246	si:ch73-264i18.3	si:ch73-264i18.3	https://zfin.org/ZDB-GENE-141216-184	si:ch73-264i18.3 [Source:ZFIN;Acc:ZDB-GENE-141216-184]
ENSDARG00000037713	pcnp	pcnp	https://zfin.org/ZDB-GENE-041010-130	PEST proteolytic signal containing nuclear protein [Source:ZFIN;Acc:ZDB-GENE-041010-130]
ENSDARG00000093448	mpc1	mpc1	https://zfin.org/ZDB-GENE-040718-94	mitochondrial pyruvate carrier 1 [Source:ZFIN;Acc:ZDB-GENE-040718-94]
ENSDARG00000063626	ddx21	ddx21	https://zfin.org/ZDB-GENE-031113-10	DEAD (Asp-Glu-Ala-Asp) box helicase 21 [Source:ZFIN;Acc:ZDB-GENE-031113-10]
ENSDARG00000043492	irf1a	irf1a	https://zfin.org/ZDB-GENE-060421-4031	interferon regulatory factor 1a [Source:ZFIN;Acc:ZDB-GENE-060421-4031]
ENSDARG00000074869	si:ch1073-291c23.2	si:ch1073-291c23.2	https://zfin.org/ZDB-GENE-081107-2	si:ch1073-291c23.2 [Source:ZFIN;Acc:ZDB-GENE-081107-2]
ENSDARG00000068515	chs1	chs1	https://zfin.org/ZDB-GENE-030131-1188	chitin synthase 1 [Source:ZFIN;Acc:ZDB-GENE-030131-1188]
ENSDARG00000043873	arid4a	arid4a	https://zfin.org/ZDB-GENE-050809-105	AT rich interactive domain 4A (RBP1-like) [Source:ZFIN;Acc:ZDB-GENE-050809-105]
ENSDARG00000063574	mtg2	mtg2	https://zfin.org/ZDB-GENE-030131-2209	mitochondrial ribosome-associated GTPase 2 [Source:ZFIN;Acc:ZDB-GENE-030131-2209]
ENSDARG00000035028	lpcat4	lpcat4	https://zfin.org/ZDB-GENE-030131-5777	lysophosphatidylcholine acyltransferase 4 [Source:ZFIN;Acc:ZDB-GENE-030131-5777]
ENSDARG00000101892	ino80e	ino80e.1	https://zfin.org/
ENSDARG00000102226	gpr19	gpr19	https://zfin.org/ZDB-GENE-040426-1295	G protein-coupled receptor 19 [Source:ZFIN;Acc:ZDB-GENE-040426-1295]
ENSDARG00000018989	hspa4b	hspa4b	https://zfin.org/ZDB-GENE-030131-6018	heat shock protein 4b [Source:ZFIN;Acc:ZDB-GENE-030131-6018]
ENSDARG00000055350	sun1	sun1	https://zfin.org/ZDB-GENE-050522-551	Sad1 and UNC84 domain containing 1 [Source:ZFIN;Acc:ZDB-GENE-050522-551]
ENSDARG00000092162	mhc1zaa	mhc1zaa	https://zfin.org/ZDB-GENE-030916-1	major histocompatibility complex class I ZAA [Source:ZFIN;Acc:ZDB-GENE-030916-1]
ENSDARG00000074765	mhc1zja	mhc1zja	https://zfin.org/ZDB-GENE-130206-11	major histocompatibility complex class I ZJA [Source:ZFIN;Acc:ZDB-GENE-130206-11]
ENSDARG00000011837	zgc:100846	zgc:100846	https://zfin.org/ZDB-GENE-040801-47	zgc:100846 [Source:ZFIN;Acc:ZDB-GENE-040801-47]
ENSDARG00000008906	si:ch211-241e1.5	si:ch211-241e1.5	https://zfin.org/ZDB-GENE-030131-6298	si:ch211-241e1.5 [Source:ZFIN;Acc:ZDB-GENE-030131-6298]
ENSDARG00000024278	adh8b	adh8b	https://zfin.org/ZDB-GENE-030529-2	alcohol dehydrogenase 8b [Source:ZFIN;Acc:ZDB-GENE-030529-2]
ENSDARG00000057006	zgc:113201	zgc:113201	https://zfin.org/ZDB-GENE-050522-524	zgc:113201 [Source:ZFIN;Acc:ZDB-GENE-050522-524]
ENSDARG00000013274	eif4eb	eif4eb	https://zfin.org/ZDB-GENE-041121-14	eukaryotic translation initiation factor 4eb [Source:ZFIN;Acc:ZDB-GENE-041121-14]
ENSDARG00000104288	hfm1	hfm1	https://zfin.org/ZDB-GENE-061207-43	HFM1, ATP-dependent DNA helicase homolog (S. cerevisiae) [Source:ZFIN;Acc:ZDB-GENE-061207-43]
ENSDARG00000076815	eif3s10	eif3s10	https://zfin.org/ZDB-GENE-030131-5726	eukaryotic translation initiation factor 3, subunit 10 (theta) [Source:ZFIN;Acc:ZDB-GENE-030131-5726]
ENSDARG00000063538	kalrnb	kalrnb	https://zfin.org/ZDB-GENE-060421-7244	kalirin, RhoGEF kinase b [Source:ZFIN;Acc:ZDB-GENE-060421-7244]
ENSDARG00000043562	zgc:65997	zgc:65997	https://zfin.org/ZDB-GENE-040426-1502	zgc:65997 [Source:ZFIN;Acc:ZDB-GENE-040426-1502]
ENSDARG00000062330	si:ch211-233a24.2	si:ch211-233a24.2	https://zfin.org/ZDB-GENE-090313-98	si:ch211-233a24.2 [Source:ZFIN;Acc:ZDB-GENE-090313-98]
ENSDARG00000007739	atp1a1a.2	atp1a1a.2	https://zfin.org/ZDB-GENE-001212-2	ATPase, Na+/K+ transporting, alpha 1a polypeptide, tandem duplicate 2 [Source:ZFIN;Acc:ZDB-GENE-001212-2]
ENSDARG00000104049	crebl2	crebl2	https://zfin.org/ZDB-GENE-040718-456	cAMP responsive element binding protein-like 2 [Source:ZFIN;Acc:ZDB-GENE-040718-456]
ENSDARG00000094799	plxnb2a	plxnb2a	https://zfin.org/ZDB-GENE-030131-8917	plexin b2a [Source:ZFIN;Acc:ZDB-GENE-030131-8917]
ENSDARG00000002791	atp1a1a.1	atp1a1a.1	https://zfin.org/ZDB-GENE-001212-1	ATPase, Na+/K+ transporting, alpha 1a polypeptide, tandem duplicate 1 [Source:ZFIN;Acc:ZDB-GENE-001212-1]
ENSDARG00000042236	atrx	atrx	https://zfin.org/ZDB-GENE-030912-11	alpha thalassemia/mental retardation syndrome X-linked homolog (human) [Source:ZFIN;Acc:ZDB-GENE-030912-11]
ENSDARG00000005606	paxip1	paxip1	https://zfin.org/ZDB-GENE-041010-214	PAX interacting (with transcription-activation domain) protein 1 [Source:ZFIN;Acc:ZDB-GENE-041010-214]
ENSDARG00000055086	ggnbp2	ggnbp2	https://zfin.org/ZDB-GENE-060929-52	gametogenetin binding protein 2 [Source:ZFIN;Acc:ZDB-GENE-060929-52]
ENSDARG00000033440	metap1	metap1	https://zfin.org/ZDB-GENE-050626-124	methionyl aminopeptidase 1 [Source:ZFIN;Acc:ZDB-GENE-050626-124]
ENSDARG00000055022	pds5a	pds5a	https://zfin.org/ZDB-GENE-040426-1612	PDS5 cohesin associated factor A [Source:ZFIN;Acc:ZDB-GENE-040426-1612]
ENSDARG00000001870	atp1a1a.4	atp1a1a.4	https://zfin.org/ZDB-GENE-001212-4	ATPase, Na+/K+ transporting, alpha 1a polypeptide, tandem duplicate 4 [Source:ZFIN;Acc:ZDB-GENE-001212-4]
ENSDARG00000078381	trip11	trip11	https://zfin.org/ZDB-GENE-030131-9833	thyroid hormone receptor interactor 11 [Source:ZFIN;Acc:ZDB-GENE-030131-9833]
ENSDARG00000019986	grhprb	grhprb	https://zfin.org/ZDB-GENE-040426-1847	glyoxylate reductase/hydroxypyruvate reductase b [Source:ZFIN;Acc:ZDB-GENE-040426-1847]
ENSDARG00000104227	nop10	nop10	https://zfin.org/ZDB-GENE-041007-4	NOP10 ribonucleoprotein homolog (yeast) [Source:ZFIN;Acc:ZDB-GENE-041007-4]
ENSDARG00000037307	gnpda1	gnpda1	https://zfin.org/ZDB-GENE-050417-417	glucosamine-6-phosphate deaminase 1 [Source:ZFIN;Acc:ZDB-GENE-050417-417]
ENSDARG00000062971	sdhaf2	sdhaf2	https://zfin.org/ZDB-GENE-030131-7564	succinate dehydrogenase complex assembly factor 2 [Source:ZFIN;Acc:ZDB-GENE-030131-7564]
ENSDARG00000033533	ccdc115	ccdc115	https://zfin.org/ZDB-GENE-050227-20	coiled-coil domain containing 115 [Source:ZFIN;Acc:ZDB-GENE-050227-20]
ENSDARG00000007892	pdcd2	pdcd2	https://zfin.org/ZDB-GENE-040426-1236	programmed cell death 2 [Source:ZFIN;Acc:ZDB-GENE-040426-1236]
ENSDARG00000002006	rxrbb	rxrbb	https://zfin.org/ZDB-GENE-990415-242	retinoid x receptor, beta b [Source:ZFIN;Acc:ZDB-GENE-990415-242]
ENSDARG00000054362	ccdc47	ccdc47	https://zfin.org/ZDB-GENE-040912-15	coiled-coil domain containing 47 [Source:ZFIN;Acc:ZDB-GENE-040912-15]
ENSDARG00000014244	rbmx	rbmx	https://zfin.org/ZDB-GENE-030131-579	RNA binding motif protein, X-linked [Source:ZFIN;Acc:ZDB-GENE-030131-579]
ENSDARG00000012261	eftud2	eftud2	https://zfin.org/ZDB-GENE-040426-1569	elongation factor Tu GTP binding domain containing 2 [Source:ZFIN;Acc:ZDB-GENE-040426-1569]
ENSDARG00000070916	dnajc27	dnajc27	https://zfin.org/ZDB-GENE-081022-93	DnaJ (Hsp40) homolog, subfamily C, member 27 [Source:ZFIN;Acc:ZDB-GENE-081022-93]
ENSDARG00000069865	grxcr1	grxcr1	https://zfin.org/ZDB-GENE-070424-166	glutaredoxin, cysteine rich 1 [Source:ZFIN;Acc:ZDB-GENE-070424-166]
ENSDARG00000008192	pank1a	pank1a	https://zfin.org/ZDB-GENE-040426-2846	pantothenate kinase 1a [Source:ZFIN;Acc:ZDB-GENE-040426-2846]
ENSDARG00000058349	polr2l	polr2l	https://zfin.org/ZDB-GENE-050522-181	polymerase (RNA) II (DNA directed) polypeptide L [Source:ZFIN;Acc:ZDB-GENE-050522-181]
ENSDARG00000096548	si:dkey-6o1.2	si:dkey-6o1.2	https://zfin.org/ZDB-GENE-121214-102	si:dkey-6o1.2 [Source:ZFIN;Acc:ZDB-GENE-121214-102]
ENSDARG00000054906	ier5l	ier5l	https://zfin.org/ZDB-GENE-030131-5134	immediate early response 5-like [Source:ZFIN;Acc:ZDB-GENE-030131-5134]
ENSDARG00000018145	mid1ip1l	mid1ip1l	https://zfin.org/ZDB-GENE-030131-1697	MID1 interacting protein 1, like [Source:ZFIN;Acc:ZDB-GENE-030131-1697]
ENSDARG00000104793	dgke	dgke	https://zfin.org/ZDB-GENE-090512-7	diacylglycerol kinase, epsilon [Source:ZFIN;Acc:ZDB-GENE-090512-7]
ENSDARG00000099850	iqsec3a	iqsec3a	https://zfin.org/ZDB-GENE-041210-343	IQ motif and Sec7 domain 3a [Source:ZFIN;Acc:ZDB-GENE-041210-343]
ENSDARG00000009252	napepld	napepld	https://zfin.org/ZDB-GENE-030131-3856	N-acyl phosphatidylethanolamine phospholipase D [Source:ZFIN;Acc:ZDB-GENE-030131-3856]
ENSDARG00000096970	si:ch211-137i24.14	si:ch211-137i24.14	https://zfin.org/ZDB-GENE-131120-27	si:ch211-137i24.14 [Source:ZFIN;Acc:ZDB-GENE-131120-27]
ENSDARG00000038258	proca	proca	https://zfin.org/ZDB-GENE-060824-5	protein C (inactivator of coagulation factors Va and VIIIa), a [Source:ZFIN;Acc:ZDB-GENE-060824-5]
ENSDARG00000095538	senp3a	senp3a	https://zfin.org/ZDB-GENE-030131-2303	SUMO1/sentrin/SMT3 specific peptidase 3a [Source:ZFIN;Acc:ZDB-GENE-030131-2303]
ENSDARG00000053455	ccdc103	ccdc103	https://zfin.org/ZDB-GENE-040718-253	coiled-coil domain containing 103 [Source:ZFIN;Acc:ZDB-GENE-040718-253]
ENSDARG00000003032	eif4a1b	eif4a1b	https://zfin.org/ZDB-GENE-040120-6	eukaryotic translation initiation factor 4A1B [Source:ZFIN;Acc:ZDB-GENE-040120-6]
ENSDARG00000012495	mphosph10	mphosph10	https://zfin.org/ZDB-GENE-030131-2146	M-phase phosphoprotein 10 (U3 small nucleolar ribonucleoprotein) [Source:ZFIN;Acc:ZDB-GENE-030131-2146]
ENSDARG00000005112	cdh17	cdh17	https://zfin.org/ZDB-GENE-030910-3	cadherin 17, LI cadherin (liver-intestine) [Source:ZFIN;Acc:ZDB-GENE-030910-3]
ENSDARG00000031985	ppp2r4	ppp2r4	https://zfin.org/ZDB-GENE-040801-11	protein phosphatase 2A activator, regulatory subunit 4 [Source:ZFIN;Acc:ZDB-GENE-040801-11]
ENSDARG00000003270	dhps	dhps	https://zfin.org/ZDB-GENE-040426-2001	deoxyhypusine synthase [Source:ZFIN;Acc:ZDB-GENE-040426-2001]
ENSDARG00000038786	smarcd3a	smarcd3a	https://zfin.org/ZDB-GENE-070912-491	SWI/SNF related, matrix associated, actin dependent regulator of chromatin, subfamily d, member 3a [Source:ZFIN;Acc:ZDB-GENE-070912-491]
ENSDARG00000039701	emx2	emx2	https://zfin.org/ZDB-GENE-990415-54	empty spiracles homeobox 2 [Source:ZFIN;Acc:ZDB-GENE-990415-54]
ENSDARG00000031775	ube2s	ube2s	https://zfin.org/ZDB-GENE-050913-92	ubiquitin-conjugating enzyme E2S [Source:ZFIN;Acc:ZDB-GENE-050913-92]
ENSDARG00000055770	dffa	dffa	https://zfin.org/ZDB-GENE-040718-376	DNA fragmentation factor, alpha polypeptide [Source:ZFIN;Acc:ZDB-GENE-040718-376]
ENSDARG00000099257	si:ch73-119p20.1	si:ch73-119p20.1	https://zfin.org/ZDB-GENE-141216-395	si:ch73-119p20.1 [Source:ZFIN;Acc:ZDB-GENE-141216-395]
ENSDARG00000054355	dcaf7	dcaf7	https://zfin.org/ZDB-GENE-030131-9511	ddb1 and cul4 associated factor 7 [Source:ZFIN;Acc:ZDB-GENE-030131-9511]
ENSDARG00000018060	pik3r2	pik3r2	https://zfin.org/ZDB-GENE-040309-1	phosphoinositide-3-kinase, regulatory subunit 2 (beta) [Source:ZFIN;Acc:ZDB-GENE-040309-1]
ENSDARG00000039279	golga5	golga5	https://zfin.org/ZDB-GENE-040426-2749	golgin A5 [Source:ZFIN;Acc:ZDB-GENE-040426-2749]
ENSDARG00000021794	hmmr	hmmr	https://zfin.org/ZDB-GENE-030131-731	hyaluronan-mediated motility receptor (RHAMM) [Source:ZFIN;Acc:ZDB-GENE-030131-731]
ENSDARG00000098311	ZFOS-932H1.3	ZFOS-932H1.3	https://zfin.org/
ENSDARG00000102855	neo1a	neo1a	https://zfin.org/ZDB-GENE-021031-1	neogenin 1a [Source:ZFIN;Acc:ZDB-GENE-021031-1]
ENSDARG00000031228	podxl	podxl	https://zfin.org/ZDB-GENE-030131-2805	podocalyxin-like [Source:ZFIN;Acc:ZDB-GENE-030131-2805]
ENSDARG00000007960	hnrnpaba	hnrnpaba	https://zfin.org/ZDB-GENE-030131-185	heterogeneous nuclear ribonucleoprotein A/Ba [Source:ZFIN;Acc:ZDB-GENE-030131-185]
ENSDARG00000045913	mrps10	mrps10	https://zfin.org/ZDB-GENE-040914-39	mitochondrial ribosomal protein S10 [Source:ZFIN;Acc:ZDB-GENE-040914-39]
ENSDARG00000025576	mkln1	mkln1	https://zfin.org/ZDB-GENE-030131-3942	muskelin 1, intracellular mediator containing kelch motifs [Source:ZFIN;Acc:ZDB-GENE-030131-3942]
ENSDARG00000045914	si:ch211-51e12.7	si:ch211-51e12.7	https://zfin.org/ZDB-GENE-030131-8279	si:ch211-51e12.7 [Source:ZFIN;Acc:ZDB-GENE-030131-8279]
ENSDARG00000036831	rnf41	rnf41	https://zfin.org/ZDB-GENE-040426-2920	ring finger protein 41 [Source:ZFIN;Acc:ZDB-GENE-040426-2920]
ENSDARG00000014994	tbp	tbp	https://zfin.org/ZDB-GENE-030616-563	TATA box binding protein [Source:ZFIN;Acc:ZDB-GENE-030616-563]
ENSDARG00000027826	pudp	pudp	https://zfin.org/ZDB-GENE-050522-36	pseudouridine 5'-phosphatase [Source:ZFIN;Acc:ZDB-GENE-050522-36]
ENSDARG00000102474	dusp16	dusp16	https://zfin.org/ZDB-GENE-040426-2360	dual specificity phosphatase 16 [Source:ZFIN;Acc:ZDB-GENE-040426-2360]
ENSDARG00000104891	si:dkey-109j17.5	si:dkey-109j17.5	https://zfin.org/ZDB-GENE-090313-173	si:dkey-109j17.5 [Source:ZFIN;Acc:ZDB-GENE-090313-173]
ENSDARG00000056346	acap1	acap1	https://zfin.org/ZDB-GENE-070112-1242	ArfGAP with coiled-coil, ankyrin repeat and PH domains 1 [Source:ZFIN;Acc:ZDB-GENE-070112-1242]
ENSDARG00000101432	rab11fip2	rab11fip2	https://zfin.org/ZDB-GENE-100727-5	RAB11 family interacting protein 2 (class I) [Source:ZFIN;Acc:ZDB-GENE-100727-5]
ENSDARG00000070047	rgs4	rgs4	https://zfin.org/ZDB-GENE-030131-9839	regulator of G-protein signaling 4 [Source:ZFIN;Acc:ZDB-GENE-030131-9839]
ENSDARG00000013979	ndfip1	ndfip1	https://zfin.org/ZDB-GENE-030131-2767	Nedd4 family interacting protein 1 [Source:ZFIN;Acc:ZDB-GENE-030131-2767]
ENSDARG00000104373	si:zfos-932h1.2	si:zfos-932h1.2	https://zfin.org/ZDB-GENE-141212-345	si:zfos-932h1.2 [Source:ZFIN;Acc:ZDB-GENE-141212-345]
ENSDARG00000003757	cnpy1	cnpy1	https://zfin.org/ZDB-GENE-060315-3	canopy1 [Source:ZFIN;Acc:ZDB-GENE-060315-3]
ENSDARG00000023958	rnf181	rnf181	https://zfin.org/ZDB-GENE-040426-1024	ring finger protein 181 [Source:ZFIN;Acc:ZDB-GENE-040426-1024]
ENSDARG00000102123	phtf2	phtf2	https://zfin.org/ZDB-GENE-040711-4	putative homeodomain transcription factor 2 [Source:ZFIN;Acc:ZDB-GENE-040711-4]
ENSDARG00000069334	AGFG2	AGFG2	https://zfin.org/ZDB-GENE-050913-119	zgc:114045 [Source:ZFIN;Acc:ZDB-GENE-050913-119]
ENSDARG00000053457	rpl23	rpl23	https://zfin.org/ZDB-GENE-030131-8756	ribosomal protein L23 [Source:ZFIN;Acc:ZDB-GENE-030131-8756]
ENSDARG00000061185	nat15	nat15	https://zfin.org/ZDB-GENE-041111-143	N-acetyltransferase 15 (GCN5-related, putative) [Source:ZFIN;Acc:ZDB-GENE-041111-143]
ENSDARG00000057426	oard1	oard1	https://zfin.org/ZDB-GENE-050522-480	O-acyl-ADP-ribose deacylase 1 [Source:ZFIN;Acc:ZDB-GENE-050522-480]
ENSDARG00000045428	mcee	mcee	https://zfin.org/ZDB-GENE-050522-368	methylmalonyl CoA epimerase [Source:ZFIN;Acc:ZDB-GENE-050522-368]
ENSDARG00000015759	tspan7	tspan7	https://zfin.org/ZDB-GENE-030131-5435	tetraspanin 7 [Source:ZFIN;Acc:ZDB-GENE-030131-5435]
ENSDARG00000070961	lepr	lepr	https://zfin.org/ZDB-GENE-080104-1	leptin receptor [Source:ZFIN;Acc:ZDB-GENE-080104-1]
ENSDARG00000015314	zc4h2	zc4h2	https://zfin.org/ZDB-GENE-030131-2207	zinc finger, C4H2 domain containing [Source:ZFIN;Acc:ZDB-GENE-030131-2207]
ENSDARG00000070546	msgn1	msgn1	https://zfin.org/ZDB-GENE-030722-1	mesogenin 1 [Source:ZFIN;Acc:ZDB-GENE-030722-1]
ENSDARG00000104011	rps17	rps17	https://zfin.org/ZDB-GENE-040426-1852	ribosomal protein S17 [Source:ZFIN;Acc:ZDB-GENE-040426-1852]
ENSDARG00000100083	sgut1	sgut1	https://zfin.org/ZDB-GENE-041114-56	SGT1 homolog, MIS12 kinetochore complex assembly cochaperone [Source:ZFIN;Acc:ZDB-GENE-041114-56]
ENSDARG00000103856	ptcd3	ptcd3	https://zfin.org/ZDB-GENE-030131-6849	pentatricopeptide repeat domain 3 [Source:ZFIN;Acc:ZDB-GENE-030131-6849]
ENSDARG00000062198	pcm1	pcm1	https://zfin.org/ZDB-GENE-030131-428	pericentriolar material 1 [Source:ZFIN;Acc:ZDB-GENE-030131-428]
ENSDARG00000104311	scmh1	scmh1	https://zfin.org/ZDB-GENE-070410-82	sex comb on midleg homolog 1 (Drosophila) [Source:ZFIN;Acc:ZDB-GENE-070410-82]
ENSDARG00000055708	timm8b	timm8b	https://zfin.org/ZDB-GENE-031019-1	translocase of inner mitochondrial membrane 8 homolog B (yeast) [Source:ZFIN;Acc:ZDB-GENE-031019-1]
ENSDARG00000028322	pex14	pex14	https://zfin.org/ZDB-GENE-060130-169	peroxisomal biogenesis factor 14 [Source:ZFIN;Acc:ZDB-GENE-060130-169]
ENSDARG00000034605	zgc:153169	zgc:153169	https://zfin.org/ZDB-GENE-060929-764	zgc:153169 [Source:ZFIN;Acc:ZDB-GENE-060929-764]
ENSDARG00000076094	klhl30	klhl30	https://zfin.org/ZDB-GENE-100913-2	kelch-like family member 30 [Source:ZFIN;Acc:ZDB-GENE-100913-2]
ENSDARG00000078211	espnla	espnla	https://zfin.org/ZDB-GENE-131121-3	espin-like a [Source:ZFIN;Acc:ZDB-GENE-131121-3]
ENSDARG00000077090	PLXNB2	PLXNB2	https://zfin.org/ZDB-GENE-041210-159	si:ch211-127b11.1 [Source:ZFIN;Acc:ZDB-GENE-041210-159]
ENSDARG00000009488	gipc2	gipc2	https://zfin.org/ZDB-GENE-040426-921	GIPC PDZ domain containing family, member 2 [Source:ZFIN;Acc:ZDB-GENE-040426-921]
ENSDARG00000079525	slc39a5	slc39a5	https://zfin.org/ZDB-GENE-060608-1	solute carrier family 39 (zinc transporter), member 5 [Source:ZFIN;Acc:ZDB-GENE-060608-1]
ENSDARG00000062463	zc3h12b	zc3h12b	https://zfin.org/ZDB-GENE-060526-290	zinc finger CCCH-type containing 12B [Source:ZFIN;Acc:ZDB-GENE-060526-290]
ENSDARG00000011764	asun	asun	https://zfin.org/ZDB-GENE-030131-6224	asunder, spermatogenesis regulator homolog (Drosphila) [Source:ZFIN;Acc:ZDB-GENE-030131-6224]
ENSDARG00000062538	si:dkey-215k6.1	si:dkey-215k6.1	https://zfin.org/ZDB-GENE-060526-251	si:dkey-215k6.1 [Source:ZFIN;Acc:ZDB-GENE-060526-251]
ENSDARG00000053405	sord	sord	https://zfin.org/ZDB-GENE-040426-1231	sorbitol dehydrogenase [Source:ZFIN;Acc:ZDB-GENE-040426-1231]
ENSDARG00000087536	znf407	znf407	https://zfin.org/ZDB-GENE-110411-123	zinc finger protein 407 [Source:ZFIN;Acc:ZDB-GENE-110411-123]
ENSDARG00000045790	si:ch211-125a15.1	si:ch211-125a15.1	https://zfin.org/ZDB-GENE-041210-104	si:ch211-125a15.1 [Source:ZFIN;Acc:ZDB-GENE-041210-104]
ENSDARG00000002644	rgs5a	rgs5a	https://zfin.org/ZDB-GENE-030131-7570	regulator of G-protein signaling 5a [Source:ZFIN;Acc:ZDB-GENE-030131-7570]
ENSDARG00000039406	prom2	prom2	https://zfin.org/ZDB-GENE-080723-16	prominin 2 [Source:ZFIN;Acc:ZDB-GENE-080723-16]
ENSDARG00000016161	ccdc170	ccdc170	https://zfin.org/ZDB-GENE-070112-162	coiled-coil domain containing 170 [Source:ZFIN;Acc:ZDB-GENE-070112-162]
ENSDARG00000044575	vars	vars	https://zfin.org/ZDB-GENE-010601-1	valyl-tRNA synthetase [Source:ZFIN;Acc:ZDB-GENE-010601-1]
ENSDARG00000057626	josd2	josd2	https://zfin.org/ZDB-GENE-040426-850	Josephin domain containing 2 [Source:ZFIN;Acc:ZDB-GENE-040426-850]
ENSDARG00000039699	fam204a	fam204a	https://zfin.org/ZDB-GENE-040718-271	family with sequence similarity 204, member A [Source:ZFIN;Acc:ZDB-GENE-040718-271]
ENSDARG00000099352	FMN1	FMN1.1	https://zfin.org/ZDB-GENE-131127-571	si:rp71-62i8.1 [Source:ZFIN;Acc:ZDB-GENE-131127-571]
ENSDARG00000053129	carhsp1	carhsp1	https://zfin.org/ZDB-GENE-040426-1479	calcium regulated heat stable protein 1 [Source:ZFIN;Acc:ZDB-GENE-040426-1479]
ENSDARG00000095092	si:ch211-232m8.3	si:ch211-232m8.3	https://zfin.org/ZDB-GENE-081107-22	si:ch211-232m8.3 [Source:ZFIN;Acc:ZDB-GENE-081107-22]
ENSDARG00000092889	SYCE3	SYCE3	https://zfin.org/ZDB-GENE-081022-85	zgc:194246 [Source:ZFIN;Acc:ZDB-GENE-081022-85]
ENSDARG00000040303	nbn	nbn	https://zfin.org/ZDB-GENE-041008-35	nibrin [Source:ZFIN;Acc:ZDB-GENE-041008-35]
ENSDARG00000038980	txndc12	txndc12	https://zfin.org/ZDB-GENE-050522-497	thioredoxin domain containing 12 (endoplasmic reticulum) [Source:ZFIN;Acc:ZDB-GENE-050522-497]
ENSDARG00000038151	zgc:92360	zgc:92360	https://zfin.org/ZDB-GENE-040718-470	zgc:92360 [Source:ZFIN;Acc:ZDB-GENE-040718-470]
ENSDARG00000056378	ifi30	ifi30	https://zfin.org/ZDB-GENE-030131-8447	interferon, gamma-inducible protein 30 [Source:ZFIN;Acc:ZDB-GENE-030131-8447]
ENSDARG00000008235	cog5	cog5	https://zfin.org/ZDB-GENE-041210-47	component of oligomeric golgi complex 5 [Source:ZFIN;Acc:ZDB-GENE-041210-47]
ENSDARG00000053467	gtpbp1	gtpbp1	https://zfin.org/ZDB-GENE-030909-12	GTP binding protein 1 [Source:ZFIN;Acc:ZDB-GENE-030909-12]
ENSDARG00000062430	gpd2	gpd2	https://zfin.org/ZDB-GENE-030131-4869	glycerol-3-phosphate dehydrogenase 2 (mitochondrial) [Source:ZFIN;Acc:ZDB-GENE-030131-4869]
ENSDARG00000104396	trim25	trim25	https://zfin.org/ZDB-GENE-040426-797	tripartite motif containing 25 [Source:ZFIN;Acc:ZDB-GENE-040426-797]
ENSDARG00000005754	ptprfb	ptprfb	https://zfin.org/ZDB-GENE-060503-530	protein tyrosine phosphatase, receptor type, f, b [Source:ZFIN;Acc:ZDB-GENE-060503-530]
ENSDARG00000060716	prkx	prkx	https://zfin.org/ZDB-GENE-090313-408	protein kinase, X-linked [Source:ZFIN;Acc:ZDB-GENE-090313-408]
ENSDARG00000055719	ino80c	ino80c	https://zfin.org/ZDB-GENE-040625-97	INO80 complex subunit C [Source:ZFIN;Acc:ZDB-GENE-040625-97]
ENSDARG00000038787	tmub1	tmub1	https://zfin.org/ZDB-GENE-040426-2504	transmembrane and ubiquitin-like domain containing 1 [Source:ZFIN;Acc:ZDB-GENE-040426-2504]
ENSDARG00000031116	dnal4a	dnal4a	https://zfin.org/ZDB-GENE-040801-122	dynein, axonemal, light chain 4a [Source:ZFIN;Acc:ZDB-GENE-040801-122]
ENSDARG00000022623	fbxo44	fbxo44	https://zfin.org/ZDB-GENE-041212-85	F-box protein 44 [Source:ZFIN;Acc:ZDB-GENE-041212-85]
ENSDARG00000058574	abcg2c	abcg2c	https://zfin.org/ZDB-GENE-050517-37	ATP-binding cassette, sub-family G (WHITE), member 2c [Source:ZFIN;Acc:ZDB-GENE-050517-37]
ENSDARG00000062956	dagla	dagla	https://zfin.org/ZDB-GENE-070619-1	diacylglycerol lipase, alpha [Source:ZFIN;Acc:ZDB-GENE-070619-1]
ENSDARG00000019038	sgsm3	sgsm3	https://zfin.org/ZDB-GENE-040426-2635	small G protein signaling modulator 3 [Source:ZFIN;Acc:ZDB-GENE-040426-2635]
ENSDARG00000029663	rab1ab	rab1ab	https://zfin.org/ZDB-GENE-030616-564	RAB1A, member RAS oncogene family b [Source:ZFIN;Acc:ZDB-GENE-030616-564]
ENSDARG00000024311	nsmce4a	nsmce4a	https://zfin.org/ZDB-GENE-050522-111	NSE4 homolog A, SMC5-SMC6 complex component [Source:ZFIN;Acc:ZDB-GENE-050522-111]
ENSDARG00000103598	siva1	siva1	https://zfin.org/ZDB-GENE-050506-57	SIVA1, apoptosis-inducing factor [Source:ZFIN;Acc:ZDB-GENE-050506-57]
ENSDARG00000097666	arid4a	arid4a.1	https://zfin.org/
ENSDARG00000100894	si:ch211-193k8.5	si:ch211-193k8.5	https://zfin.org/ZDB-GENE-030131-5121	si:ch211-193k8.5 [Source:ZFIN;Acc:ZDB-GENE-030131-5121]
ENSDARG00000093823	si:ch211-102c2.8	si:ch211-102c2.8	https://zfin.org/ZDB-GENE-081104-98	si:ch211-102c2.8 [Source:ZFIN;Acc:ZDB-GENE-081104-98]
ENSDARG00000104342	csnk1g1	csnk1g1	https://zfin.org/ZDB-GENE-041212-63	casein kinase 1, gamma 1 [Source:ZFIN;Acc:ZDB-GENE-041212-63]
ENSDARG00000025032	nr3c1	nr3c1	https://zfin.org/ZDB-GENE-050522-503	nuclear receptor subfamily 3, group C, member 1 (glucocorticoid receptor) [Source:ZFIN;Acc:ZDB-GENE-050522-503]
ENSDARG00000037837	ogfr	ogfr	https://zfin.org/ZDB-GENE-030131-377	opioid growth factor receptor [Source:ZFIN;Acc:ZDB-GENE-030131-377]
ENSDARG00000006031	abat	abat	https://zfin.org/ZDB-GENE-031006-4	4-aminobutyrate aminotransferase [Source:ZFIN;Acc:ZDB-GENE-031006-4]
ENSDARG00000062457	las1l	las1l	https://zfin.org/ZDB-GENE-030131-3625	LAS1-like, ribosome biogenesis factor [Source:ZFIN;Acc:ZDB-GENE-030131-3625]
ENSDARG00000077188	atrnl1a	atrnl1a	https://zfin.org/ZDB-GENE-081028-60	attractin-like 1a [Source:ZFIN;Acc:ZDB-GENE-081028-60]
ENSDARG00000025549	ndufaf1	ndufaf1	https://zfin.org/ZDB-GENE-050306-9	NADH dehydrogenase (ubiquinone) complex I, assembly factor 1 [Source:ZFIN;Acc:ZDB-GENE-050306-9]
ENSDARG00000039411	cep68	cep68	https://zfin.org/ZDB-GENE-030616-565	centrosomal protein 68 [Source:ZFIN;Acc:ZDB-GENE-030616-565]
ENSDARG00000036826	ankrd52a	ankrd52a	https://zfin.org/ZDB-GENE-050522-247	ankyrin repeat domain 52a [Source:ZFIN;Acc:ZDB-GENE-050522-247]
ENSDARG00000046090	dhrs11a	dhrs11a	https://zfin.org/ZDB-GENE-060929-324	dehydrogenase/reductase (SDR family) member 11a [Source:ZFIN;Acc:ZDB-GENE-060929-324]
ENSDARG00000093646	si:ch211-270n8.3	si:ch211-270n8.3	https://zfin.org/ZDB-GENE-081028-50	si:ch211-270n8.3 [Source:ZFIN;Acc:ZDB-GENE-081028-50]
ENSDARG00000094423	si:ch211-270n8.4	si:ch211-270n8.4	https://zfin.org/ZDB-GENE-081028-70	si:ch211-270n8.4 [Source:ZFIN;Acc:ZDB-GENE-081028-70]
ENSDARG00000015111	ddx39ab	ddx39ab	https://zfin.org/ZDB-GENE-040426-2902	DEAD (Asp-Glu-Ala-Asp) box polypeptide 39Ab [Source:ZFIN;Acc:ZDB-GENE-040426-2902]
ENSDARG00000008947	rtf1	rtf1	https://zfin.org/ZDB-GENE-030131-6778	RTF1 homolog, Paf1/RNA polymerase II complex component [Source:ZFIN;Acc:ZDB-GENE-030131-6778]
ENSDARG00000056367	mpv17l2	mpv17l2	https://zfin.org/ZDB-GENE-040718-306	MPV17 mitochondrial membrane protein-like 2 [Source:ZFIN;Acc:ZDB-GENE-040718-306]
ENSDARG00000077506	tjp1a	tjp1a	https://zfin.org/ZDB-GENE-031001-2	tight junction protein 1a [Source:ZFIN;Acc:ZDB-GENE-031001-2]
ENSDARG00000029071	creld2	creld2	https://zfin.org/ZDB-GENE-040426-1626	cysteine-rich with EGF-like domains 2 [Source:ZFIN;Acc:ZDB-GENE-040426-1626]
ENSDARG00000002403	nusap1	nusap1	https://zfin.org/ZDB-GENE-030827-5	nucleolar and spindle associated protein 1 [Source:ZFIN;Acc:ZDB-GENE-030827-5]
ENSDARG00000058159	ipo8	ipo8	https://zfin.org/ZDB-GENE-060503-3	importin 8 [Source:ZFIN;Acc:ZDB-GENE-060503-3]
ENSDARG00000075924	RAPGEF4	RAPGEF4	https://zfin.org/ZDB-GENE-080219-4	zgc:171558 [Source:ZFIN;Acc:ZDB-GENE-080219-4]
ENSDARG00000055359	si:dkey-68o6.2	si:dkey-68o6.2	https://zfin.org/ZDB-GENE-141212-239	si:dkey-68o6.2 [Source:ZFIN;Acc:ZDB-GENE-141212-239]
ENSDARG00000075149	nagpa	nagpa	https://zfin.org/ZDB-GENE-070928-4	N-acetylglucosamine-1-phosphodiester alpha-N-acetylglucosaminidase [Source:ZFIN;Acc:ZDB-GENE-070928-4]
ENSDARG00000103682	si:dkey-23i12.5	si:dkey-23i12.5	https://zfin.org/ZDB-GENE-141222-32	si:dkey-23i12.5 [Source:ZFIN;Acc:ZDB-GENE-141222-32]
ENSDARG00000040248	crata	crata	https://zfin.org/ZDB-GENE-040927-17	carnitine O-acetyltransferase a [Source:ZFIN;Acc:ZDB-GENE-040927-17]
ENSDARG00000028017	tp53inp1	tp53inp1	https://zfin.org/ZDB-GENE-031018-3	tumor protein p53 inducible nuclear protein 1 [Source:ZFIN;Acc:ZDB-GENE-031018-3]
ENSDARG00000021688	mxa	mxa	https://zfin.org/ZDB-GENE-030721-5	myxovirus (influenza) resistance A [Source:ZFIN;Acc:ZDB-GENE-030721-5]
ENSDARG00000098529	ccne2	ccne2	https://zfin.org/ZDB-GENE-030131-9689	cyclin E2 [Source:ZFIN;Acc:ZDB-GENE-030131-9689]
ENSDARG00000029146	lrp1ab	lrp1ab	https://zfin.org/ZDB-GENE-030131-7126	low density lipoprotein receptor-related protein 1Ab [Source:ZFIN;Acc:ZDB-GENE-030131-7126]
ENSDARG00000027590	sept2	sept2	https://zfin.org/ZDB-GENE-030131-911	septin 2 [Source:ZFIN;Acc:ZDB-GENE-030131-911]
ENSDARG00000077075	fastk	fastk	https://zfin.org/ZDB-GENE-070912-680	Fas-activated serine/threonine kinase [Source:ZFIN;Acc:ZDB-GENE-070912-680]
ENSDARG00000010108	bri3bp	bri3bp	https://zfin.org/ZDB-GENE-030131-5254	bri3 binding protein [Source:ZFIN;Acc:ZDB-GENE-030131-5254]
ENSDARG00000076351	brinp3a.1	brinp3a.1	https://zfin.org/ZDB-GENE-080218-16	bone morphogenetic protein/retinoic acid inducible neural-specific 3a, tandem duplicate 1 [Source:ZFIN;Acc:ZDB-GENE-080218-16]
ENSDARG00000013842	tbc1d19	tbc1d19	https://zfin.org/ZDB-GENE-040426-1265	TBC1 domain family, member 19 [Source:ZFIN;Acc:ZDB-GENE-040426-1265]
ENSDARG00000007697	fabp7a	fabp7a	https://zfin.org/ZDB-GENE-000627-1	fatty acid binding protein 7, brain, a [Source:ZFIN;Acc:ZDB-GENE-000627-1]
ENSDARG00000058354	selt1a	selt1a	https://zfin.org/ZDB-GENE-030327-6	selenoprotein T, 1a [Source:ZFIN;Acc:ZDB-GENE-030327-6]
ENSDARG00000033380	gyg2	gyg2	https://zfin.org/ZDB-GENE-080723-74	glycogenin 2 [Source:ZFIN;Acc:ZDB-GENE-080723-74]
ENSDARG00000079949	supt16h	supt16h	https://zfin.org/ZDB-GENE-031118-96	SPT16 homolog, facilitates chromatin remodeling subunit [Source:ZFIN;Acc:ZDB-GENE-031118-96]
ENSDARG00000095890	znf236	znf236	https://zfin.org/ZDB-GENE-041111-195	zinc finger protein 236 [Source:ZFIN;Acc:ZDB-GENE-041111-195]
ENSDARG00000079891	dnajc6	dnajc6	https://zfin.org/ZDB-GENE-080104-2	DnaJ (Hsp40) homolog, subfamily C, member 6 [Source:ZFIN;Acc:ZDB-GENE-080104-2]
ENSDARG00000102428	si:dkey-15k2.5	si:dkey-15k2.5	https://zfin.org/ZDB-GENE-141216-131	si:dkey-15k2.5 [Source:ZFIN;Acc:ZDB-GENE-141216-131]
ENSDARG00000086618	psma3	psma3	https://zfin.org/ZDB-GENE-050913-120	proteasome subunit alpha 3 [Source:ZFIN;Acc:ZDB-GENE-050913-120]
ENSDARG00000035066	ubtf	ubtf	https://zfin.org/ZDB-GENE-030616-252	upstream binding transcription factor, RNA polymerase I [Source:ZFIN;Acc:ZDB-GENE-030616-252]
ENSDARG00000056184	dvl2	dvl2	https://zfin.org/ZDB-GENE-041118-20	dishevelled segment polarity protein 2 [Source:ZFIN;Acc:ZDB-GENE-041118-20]
ENSDARG00000061335	galnt1	galnt1	https://zfin.org/ZDB-GENE-030131-2360	UDP-N-acetyl-alpha-D-galactosamine:polypeptide N-acetylgalactosaminyltransferase 1 [Source:ZFIN;Acc:ZDB-GENE-030131-2360]
ENSDARG00000098850	si:ch211-274j7.3	si:ch211-274j7.3	https://zfin.org/ZDB-GENE-141212-311	si:ch211-274j7.3 [Source:ZFIN;Acc:ZDB-GENE-141212-311]
ENSDARG00000054814	PTP4A3	PTP4A3	https://zfin.org/ZDB-GENE-030131-2635	si:ch211-251p5.5 [Source:ZFIN;Acc:ZDB-GENE-030131-2635]
ENSDARG00000091872	CCDC117	CCDC117	https://zfin.org/ZDB-GENE-030131-1001	si:ch211-102c2.7 [Source:ZFIN;Acc:ZDB-GENE-030131-1001]
ENSDARG00000091699	capn2a	capn2a	https://zfin.org/ZDB-GENE-050320-69	calpain 2, (m/II) large subunit a [Source:ZFIN;Acc:ZDB-GENE-050320-69]
ENSDARG00000058020	fbxw9	fbxw9	https://zfin.org/ZDB-GENE-091204-198	F-box and WD repeat domain containing 9 [Source:ZFIN;Acc:ZDB-GENE-091204-198]
ENSDARG00000037030	casz1	casz1	https://zfin.org/ZDB-GENE-060130-108	castor zinc finger 1 [Source:ZFIN;Acc:ZDB-GENE-060130-108]
ENSDARG00000103207	rab11fip4b	rab11fip4b	https://zfin.org/ZDB-GENE-080722-8	RAB11 family interacting protein 4 (class II) b [Source:ZFIN;Acc:ZDB-GENE-080722-8]
ENSDARG00000094323	si:dkey-180i4.2	si:dkey-180i4.2	https://zfin.org/ZDB-GENE-060526-226	si:dkey-180i4.2 [Source:ZFIN;Acc:ZDB-GENE-060526-226]
ENSDARG00000075560	kmt2cb	kmt2cb	https://zfin.org/ZDB-GENE-070705-340	lysine (K)-specific methyltransferase 2Cb [Source:ZFIN;Acc:ZDB-GENE-070705-340]
ENSDARG00000036870	arih1l	arih1l	https://zfin.org/ZDB-GENE-040426-2395	ariadne homolog, ubiquitin-conjugating enzyme E2 binding protein, 1 like [Source:ZFIN;Acc:ZDB-GENE-040426-2395]
ENSDARG00000061095	stk36	stk36	https://zfin.org/ZDB-GENE-030912-6	serine/threonine kinase 36 (fused homolog, Drosophila) [Source:ZFIN;Acc:ZDB-GENE-030912-6]
ENSDARG00000077828	slc29a3	slc29a3	https://zfin.org/ZDB-GENE-081107-66	solute carrier family 29 (equilibrative nucleoside transporter), member 3 [Source:ZFIN;Acc:ZDB-GENE-081107-66]
ENSDARG00000104760	MAP3K6	MAP3K6	https://zfin.org/ZDB-GENE-030131-8638	si:ch211-1i11.3 [Source:ZFIN;Acc:ZDB-GENE-030131-8638]
ENSDARG00000098392	si:ch73-28h20.1	si:ch73-28h20.1	https://zfin.org/ZDB-GENE-141216-463	si:ch73-28h20.1 [Source:ZFIN;Acc:ZDB-GENE-141216-463]
ENSDARG00000043586	fas	fas	https://zfin.org/ZDB-GENE-061019-2	Fas cell surface death receptor [Source:ZFIN;Acc:ZDB-GENE-061019-2]
ENSDARG00000099104	rpl24	rpl24	https://zfin.org/ZDB-GENE-020419-25	ribosomal protein L24 [Source:ZFIN;Acc:ZDB-GENE-020419-25]
ENSDARG00000009196	anxa3a	anxa3a	https://zfin.org/ZDB-GENE-040912-58	annexin A3a [Source:ZFIN;Acc:ZDB-GENE-040912-58]
ENSDARG00000029250	poli	poli	https://zfin.org/ZDB-GENE-050417-376	polymerase (DNA directed) iota [Source:ZFIN;Acc:ZDB-GENE-050417-376]
ENSDARG00000013221	pde4ca	pde4ca	https://zfin.org/ZDB-GENE-070912-373	phosphodiesterase 4C, cAMP-specific a [Source:ZFIN;Acc:ZDB-GENE-070912-373]
ENSDARG00000061904	fhod3b	fhod3b	https://zfin.org/ZDB-GENE-081028-61	formin homology 2 domain containing 3b [Source:ZFIN;Acc:ZDB-GENE-081028-61]
ENSDARG00000102407	cep97	cep97	https://zfin.org/ZDB-GENE-031030-11	centrosomal protein 97 [Source:ZFIN;Acc:ZDB-GENE-031030-11]
ENSDARG00000101178	sh3rf2	sh3rf2	https://zfin.org/ZDB-GENE-141212-301	SH3 domain containing ring finger 2 [Source:ZFIN;Acc:ZDB-GENE-141212-301]
ENSDARG00000062101	iffo2a	iffo2a	https://zfin.org/ZDB-GENE-090313-342	intermediate filament family orphan 2a [Source:ZFIN;Acc:ZDB-GENE-090313-342]
ENSDARG00000101219	si:dkey-56m19.4	si:dkey-56m19.4	https://zfin.org/ZDB-GENE-141216-108	si:dkey-56m19.4 [Source:ZFIN;Acc:ZDB-GENE-141216-108]
ENSDARG00000052020	cmtm4	cmtm4	https://zfin.org/ZDB-GENE-040718-195	CKLF-like MARVEL transmembrane domain containing 4 [Source:ZFIN;Acc:ZDB-GENE-040718-195]
ENSDARG00000071872	zdhhc15b	zdhhc15b	https://zfin.org/ZDB-GENE-061110-106	zinc finger, DHHC-type containing 15b [Source:ZFIN;Acc:ZDB-GENE-061110-106]
ENSDARG00000035924	dync1li2	dync1li2	https://zfin.org/ZDB-GENE-050417-156	dynein, cytoplasmic 1, light intermediate chain 2 [Source:ZFIN;Acc:ZDB-GENE-050417-156]
ENSDARG00000098375	polr1a	polr1a	https://zfin.org/ZDB-GENE-030131-5286	polymerase (RNA) I polypeptide A [Source:ZFIN;Acc:ZDB-GENE-030131-5286]
ENSDARG00000097216	taf8	taf8	https://zfin.org/
ENSDARG00000078551	zgc:171242	zgc:171242	https://zfin.org/ZDB-GENE-071004-79	zgc:171242 [Source:ZFIN;Acc:ZDB-GENE-071004-79]
ENSDARG00000078166	ETAA1	ETAA1	https://zfin.org/ZDB-GENE-081107-73	si:dkey-78p8.1 [Source:ZFIN;Acc:ZDB-GENE-081107-73]
ENSDARG00000077863	mettl22	mettl22	https://zfin.org/ZDB-GENE-081022-70	methyltransferase like 22 [Source:ZFIN;Acc:ZDB-GENE-081022-70]
ENSDARG00000055530	sertad2b	sertad2b	https://zfin.org/ZDB-GENE-030616-569	SERTA domain containing 2b [Source:ZFIN;Acc:ZDB-GENE-030616-569]
ENSDARG00000070721	vdrb	vdrb	https://zfin.org/ZDB-GENE-080403-10	vitamin D (1,25- dihydroxyvitamin D3) receptor b [Source:ZFIN;Acc:ZDB-GENE-080403-10]
ENSDARG00000058848	mcoln1b	mcoln1b	https://zfin.org/ZDB-GENE-130514-1	mucolipin 1b [Source:ZFIN;Acc:ZDB-GENE-130514-1]
ENSDARG00000015707	dvl3a	dvl3a	https://zfin.org/ZDB-GENE-010319-1	dishevelled segment polarity protein 3a [Source:ZFIN;Acc:ZDB-GENE-010319-1]
ENSDARG00000097071	PIFO	PIFO	https://zfin.org/ZDB-GENE-090313-121	si:ch211-66i15.4 [Source:ZFIN;Acc:ZDB-GENE-090313-121]
ENSDARG00000045568	bcat1	bcat1	https://zfin.org/ZDB-GENE-030131-9358	branched chain amino-acid transaminase 1, cytosolic [Source:ZFIN;Acc:ZDB-GENE-030131-9358]
ENSDARG00000009550	foxi3b	foxi3b	https://zfin.org/ZDB-GENE-031126-4	forkhead box I3b [Source:ZFIN;Acc:ZDB-GENE-031126-4]
ENSDARG00000044532	nr4a2b	nr4a2b	https://zfin.org/ZDB-GENE-040718-103	nuclear receptor subfamily 4, group A, member 2b [Source:ZFIN;Acc:ZDB-GENE-040718-103]
ENSDARG00000013346	fam208ab	fam208ab	https://zfin.org/ZDB-GENE-090311-29	family with sequence similarity 208, member Ab [Source:ZFIN;Acc:ZDB-GENE-090311-29]
ENSDARG00000074321	tead3a	tead3a	https://zfin.org/ZDB-GENE-031112-10	TEA domain family member 3 a [Source:ZFIN;Acc:ZDB-GENE-031112-10]
ENSDARG00000080019	UBA6	UBA6	https://zfin.org/ZDB-GENE-090312-139	si:dkey-82j4.2 [Source:ZFIN;Acc:ZDB-GENE-090312-139]
ENSDARG00000044433	sned1	sned1	https://zfin.org/ZDB-GENE-100913-1	sushi, nidogen and EGF-like domains 1 [Source:ZFIN;Acc:ZDB-GENE-100913-1]
ENSDARG00000041607	eif4ebp3l	eif4ebp3l	https://zfin.org/ZDB-GENE-030826-26	eukaryotic translation initiation factor 4E binding protein 3, like [Source:ZFIN;Acc:ZDB-GENE-030826-26]
ENSDARG00000062785	adpgk2	adpgk2	https://zfin.org/ZDB-GENE-090609-3	ADP-dependent glucokinase 2 [Source:ZFIN;Acc:ZDB-GENE-090609-3]
ENSDARG00000035324	hnrpl	hnrpl	https://zfin.org/ZDB-GENE-040426-710	heterogeneous nuclear ribonucleoprotein L [Source:ZFIN;Acc:ZDB-GENE-040426-710]
ENSDARG00000104660	si:ch73-132f6.5	si:ch73-132f6.5	https://zfin.org/ZDB-GENE-030131-9581	si:ch73-132f6.5 [Source:ZFIN;Acc:ZDB-GENE-030131-9581]
ENSDARG00000099732	gfra1a	gfra1a	https://zfin.org/ZDB-GENE-010226-2	gdnf family receptor alpha 1a [Source:ZFIN;Acc:ZDB-GENE-010226-2]
ENSDARG00000006567	dus4l	dus4l	https://zfin.org/ZDB-GENE-040801-233	dihydrouridine synthase 4-like (S. cerevisiae) [Source:ZFIN;Acc:ZDB-GENE-040801-233]
ENSDARG00000006546	ak4	ak4	https://zfin.org/ZDB-GENE-040426-2505	adenylate kinase 4 [Source:ZFIN;Acc:ZDB-GENE-040426-2505]
ENSDARG00000060586	ctdspl2b	ctdspl2b	https://zfin.org/ZDB-GENE-030131-1809	CTD (carboxy-terminal domain, RNA polymerase II, polypeptide A) small phosphatase like 2b [Source:ZFIN;Acc:ZDB-GENE-030131-1809]
ENSDARG00000057303	galnt7	galnt7	https://zfin.org/ZDB-GENE-050522-284	UDP-N-acetyl-alpha-D-galactosamine: polypeptide N-acetylgalactosaminyltransferase 7 [Source:ZFIN;Acc:ZDB-GENE-050522-284]
ENSDARG00000093492	si:dkey-246i21.1	si:dkey-246i21.1	https://zfin.org/ZDB-GENE-090313-271	si:dkey-246i21.1 [Source:ZFIN;Acc:ZDB-GENE-090313-271]
ENSDARG00000015937	kptn	kptn	https://zfin.org/ZDB-GENE-040801-258	kaptin (actin binding protein) [Source:ZFIN;Acc:ZDB-GENE-040801-258]
ENSDARG00000036481	tcn2	tcn2	https://zfin.org/ZDB-GENE-030131-4648	transcobalamin II [Source:ZFIN;Acc:ZDB-GENE-030131-4648]
ENSDARG00000034817	asah1b	asah1b	https://zfin.org/ZDB-GENE-040426-1512	N-acylsphingosine amidohydrolase (acid ceramidase) 1b [Source:ZFIN;Acc:ZDB-GENE-040426-1512]
ENSDARG00000031632	chst10	chst10	https://zfin.org/ZDB-GENE-040808-40	carbohydrate sulfotransferase 10 [Source:ZFIN;Acc:ZDB-GENE-040808-40]
ENSDARG00000040523	smpd2a	smpd2a	https://zfin.org/ZDB-GENE-051014-1	sphingomyelin phosphodiesterase 2a, neutral membrane (neutral sphingomyelinase) [Source:ZFIN;Acc:ZDB-GENE-051014-1]
ENSDARG00000099247	si:dkey-68o6.5	si:dkey-68o6.5	https://zfin.org/ZDB-GENE-030131-5416	si:dkey-68o6.5 [Source:ZFIN;Acc:ZDB-GENE-030131-5416]
ENSDARG00000101249	si:dkey-23a13.15	si:dkey-23a13.15	https://zfin.org/ZDB-GENE-160113-119	si:dkey-23a13.15 [Source:ZFIN;Acc:ZDB-GENE-160113-119]
ENSDARG00000079347	zgc:194659	zgc:194659	https://zfin.org/ZDB-GENE-081022-139	zgc:194659 [Source:ZFIN;Acc:ZDB-GENE-081022-139]
ENSDARG00000099339	pacsin3	pacsin3	https://zfin.org/ZDB-GENE-040426-984	protein kinase C and casein kinase substrate in neurons 3 [Source:ZFIN;Acc:ZDB-GENE-040426-984]
ENSDARG00000034943	si:ch211-127l15.5	si:ch211-127l15.5	https://zfin.org/ZDB-GENE-030131-1459	si:ch211-127l15.5 [Source:ZFIN;Acc:ZDB-GENE-030131-1459]
ENSDARG00000098647	ankdd1a	ankdd1a	https://zfin.org/ZDB-GENE-070615-8	ankyrin repeat and death domain containing 1A [Source:ZFIN;Acc:ZDB-GENE-070615-8]
ENSDARG00000004861	esrrga	esrrga	https://zfin.org/ZDB-GENE-030821-2	estrogen-related receptor gamma a [Source:ZFIN;Acc:ZDB-GENE-030821-2]
ENSDARG00000044615	zak	zak	https://zfin.org/ZDB-GENE-070912-386	sterile alpha motif and leucine zipper containing kinase AZK [Source:ZFIN;Acc:ZDB-GENE-070912-386]
ENSDARG00000040300	gtpbp10	gtpbp10	https://zfin.org/ZDB-GENE-040718-153	GTP-binding protein 10 (putative) [Source:ZFIN;Acc:ZDB-GENE-040718-153]
ENSDARG00000029063	clpxa	clpxa	https://zfin.org/ZDB-GENE-040912-143	caseinolytic mitochondrial matrix peptidase chaperone subunit a [Source:ZFIN;Acc:ZDB-GENE-040912-143]
ENSDARG00000062374	leng9	leng9	https://zfin.org/ZDB-GENE-061013-607	leukocyte receptor cluster (LRC) member 9 [Source:ZFIN;Acc:ZDB-GENE-061013-607]
ENSDARG00000007760	spg21	spg21	https://zfin.org/ZDB-GENE-040426-2722	spastic paraplegia 21 (autosomal recessive, Mast syndrome) [Source:ZFIN;Acc:ZDB-GENE-040426-2722]
ENSDARG00000041199	alg12	alg12	https://zfin.org/ZDB-GENE-041210-295	ALG12, alpha-1,6-mannosyltransferase [Source:ZFIN;Acc:ZDB-GENE-041210-295]
ENSDARG00000001578	echs1	echs1	https://zfin.org/ZDB-GENE-030616-617	enoyl CoA hydratase, short chain, 1, mitochondrial [Source:ZFIN;Acc:ZDB-GENE-030616-617]
ENSDARG00000040190	qdpra	qdpra	https://zfin.org/ZDB-GENE-070705-197	quinoid dihydropteridine reductase a [Source:ZFIN;Acc:ZDB-GENE-070705-197]
ENSDARG00000096594	lratb	lratb	https://zfin.org/ZDB-GENE-060810-31	lecithin retinol acyltransferase b (phosphatidylcholine-retinol O-acyltransferase) [Source:ZFIN;Acc:ZDB-GENE-060810-31]
ENSDARG00000038976	pdcd7	pdcd7	https://zfin.org/ZDB-GENE-040728-3	programmed cell death 7 [Source:ZFIN;Acc:ZDB-GENE-040728-3]
ENSDARG00000102806	si:dkey-23a13.16	si:dkey-23a13.16	https://zfin.org/ZDB-GENE-160113-83	si:dkey-23a13.16 [Source:ZFIN;Acc:ZDB-GENE-160113-83]
ENSDARG00000091843	ubap1lb	ubap1lb	https://zfin.org/ZDB-GENE-120406-5	ubiquitin associated protein 1-like b [Source:ZFIN;Acc:ZDB-GENE-120406-5]
ENSDARG00000079336	si:ch211-150j10.4	si:ch211-150j10.4	https://zfin.org/ZDB-GENE-110411-215	si:ch211-150j10.4 [Source:ZFIN;Acc:ZDB-GENE-110411-215]
ENSDARG00000094454	cdh23	cdh23	https://zfin.org/ZDB-GENE-040513-7	cadherin-related 23 [Source:ZFIN;Acc:ZDB-GENE-040513-7]
ENSDARG00000104173	tufm	tufm	https://zfin.org/ZDB-GENE-050320-73	Tu translation elongation factor, mitochondrial [Source:ZFIN;Acc:ZDB-GENE-050320-73]
ENSDARG00000099307	si:dkey-10p5.10	si:dkey-10p5.10	https://zfin.org/ZDB-GENE-120215-130	si:dkey-10p5.10 [Source:ZFIN;Acc:ZDB-GENE-120215-130]
ENSDARG00000023878	stk24b	stk24b	https://zfin.org/ZDB-GENE-040426-2841	serine/threonine kinase 24b (STE20 homolog, yeast) [Source:ZFIN;Acc:ZDB-GENE-040426-2841]
ENSDARG00000092780	si:ch1073-170o4.1	si:ch1073-170o4.1	https://zfin.org/ZDB-GENE-030131-7012	si:ch1073-170o4.1 [Source:ZFIN;Acc:ZDB-GENE-030131-7012]
ENSDARG00000037122	TENM2	TENM2	https://zfin.org/ZDB-GENE-081027-5	si:dkey-34l15.2 [Source:ZFIN;Acc:ZDB-GENE-081027-5]
ENSDARG00000005476	nav3	nav3	https://zfin.org/ZDB-GENE-021205-1	neuron navigator 3 [Source:ZFIN;Acc:ZDB-GENE-021205-1]
ENSDARG00000035634	rfc5	rfc5	https://zfin.org/ZDB-GENE-040907-1	replication factor C (activator 1) 5 [Source:ZFIN;Acc:ZDB-GENE-040907-1]
ENSDARG00000038153	lgals2b	lgals2b	https://zfin.org/ZDB-GENE-040426-1590	lectin, galactoside-binding, soluble, 2b [Source:ZFIN;Acc:ZDB-GENE-040426-1590]
ENSDARG00000006869	stx17	stx17	https://zfin.org/ZDB-GENE-041114-164	syntaxin 17 [Source:ZFIN;Acc:ZDB-GENE-041114-164]
ENSDARG00000035608	pgam5	pgam5	https://zfin.org/ZDB-GENE-030131-683	PGAM family member 5, serine/threonine protein phosphatase, mitochondrial [Source:ZFIN;Acc:ZDB-GENE-030131-683]
ENSDARG00000100074	znf994	znf994	https://zfin.org/ZDB-GENE-110913-145	zinc finger protein 994 [Source:ZFIN;Acc:ZDB-GENE-110913-145]
ENSDARG00000099872	znf1092	znf1092	https://zfin.org/ZDB-GENE-110914-23	szinc finger protein 1092 [Source:ZFIN;Acc:ZDB-GENE-110914-23]
ENSDARG00000019008	erp44	erp44	https://zfin.org/ZDB-GENE-040426-1902	endoplasmic reticulum protein 44 [Source:ZFIN;Acc:ZDB-GENE-040426-1902]
ENSDARG00000058608	wsb2	wsb2	https://zfin.org/ZDB-GENE-081104-26	WD repeat and SOCS box containing 2 [Source:ZFIN;Acc:ZDB-GENE-081104-26]
ENSDARG00000015206	hnrnpua	hnrnpua	https://zfin.org/ZDB-GENE-030131-3731	heterogeneous nuclear ribonucleoprotein Ua [Source:ZFIN;Acc:ZDB-GENE-030131-3731]
ENSDARG00000087538	kif3a	kif3a	https://zfin.org/ZDB-GENE-050417-71	kinesin family member 3A [Source:ZFIN;Acc:ZDB-GENE-050417-71]
ENSDARG00000097957	si:ch73-239g21.2	si:ch73-239g21.2	https://zfin.org/ZDB-GENE-131118-27	si:ch73-239g21.2 [Source:ZFIN;Acc:ZDB-GENE-131118-27]
ENSDARG00000071018	ptena	ptena	https://zfin.org/ZDB-GENE-030131-3776	phosphatase and tensin homolog A [Source:ZFIN;Acc:ZDB-GENE-030131-3776]
ENSDARG00000070399	alg2	alg2	https://zfin.org/ZDB-GENE-060502-2	asparagine-linked glycosylation 2 (alpha-1,3-mannosyltransferase) [Source:ZFIN;Acc:ZDB-GENE-060502-2]
ENSDARG00000060348	map3k3	map3k3	https://zfin.org/ZDB-GENE-070910-1	mitogen-activated protein kinase kinase kinase 3 [Source:ZFIN;Acc:ZDB-GENE-070910-1]
ENSDARG00000070455	tmem245	tmem245	https://zfin.org/ZDB-GENE-100922-188	transmembrane protein 245 [Source:ZFIN;Acc:ZDB-GENE-100922-188]
ENSDARG00000089413	mbpb	mbpb	https://zfin.org/ZDB-GENE-030429-21	myelin basic protein b [Source:ZFIN;Acc:ZDB-GENE-030429-21]
ENSDARG00000076568	sec61b	sec61b	https://zfin.org/ZDB-GENE-040718-260	Sec61 translocon beta subunit [Source:ZFIN;Acc:ZDB-GENE-040718-260]
ENSDARG00000073764	si:ch211-113j14.1	si:ch211-113j14.1	https://zfin.org/ZDB-GENE-120215-110	si:ch211-113j14.1 [Source:ZFIN;Acc:ZDB-GENE-120215-110]
ENSDARG00000069118	ppp2r5eb	ppp2r5eb	https://zfin.org/ZDB-GENE-030904-6	protein phosphatase 2, regulatory subunit B', epsilon isoform b [Source:ZFIN;Acc:ZDB-GENE-030904-6]
ENSDARG00000055854	nr4a3	nr4a3	https://zfin.org/ZDB-GENE-070824-4	nuclear receptor subfamily 4, group A, member 3 [Source:ZFIN;Acc:ZDB-GENE-070824-4]
ENSDARG00000054414	spata17	spata17	https://zfin.org/ZDB-GENE-111214-1	spermatogenesis associated 17 [Source:ZFIN;Acc:ZDB-GENE-111214-1]
ENSDARG00000032963	her12	her12	https://zfin.org/ZDB-GENE-040824-5	hairy-related 12 [Source:ZFIN;Acc:ZDB-GENE-040824-5]
ENSDARG00000059048	mpzl1l	mpzl1l	https://zfin.org/ZDB-GENE-050417-455	myelin protein zero-like 1 like [Source:ZFIN;Acc:ZDB-GENE-050417-455]
ENSDARG00000078929	abhd16a	abhd16a	https://zfin.org/ZDB-GENE-010601-2	abhydrolase domain containing 16A [Source:ZFIN;Acc:ZDB-GENE-010601-2]
ENSDARG00000038113	rprd1b	rprd1b	https://zfin.org/ZDB-GENE-030131-355	regulation of nuclear pre-mRNA domain containing 1B [Source:ZFIN;Acc:ZDB-GENE-030131-355]
ENSDARG00000089260	dus1l	dus1l	https://zfin.org/ZDB-GENE-030131-1435	dihydrouridine synthase 1-like (S. cerevisiae) [Source:ZFIN;Acc:ZDB-GENE-030131-1435]
ENSDARG00000056504	frg1	frg1	https://zfin.org/ZDB-GENE-050417-324	FSHD region gene 1 [Source:ZFIN;Acc:ZDB-GENE-050417-324]
ENSDARG00000075421	pttg1	pttg1	https://zfin.org/ZDB-GENE-081104-345	pituitary tumor-transforming 1 [Source:ZFIN;Acc:ZDB-GENE-081104-345]
ENSDARG00000004114	tti1	tti1	https://zfin.org/ZDB-GENE-080819-3	TELO2 interacting protein 1 [Source:ZFIN;Acc:ZDB-GENE-080819-3]
ENSDARG00000016086	smurf1	smurf1	https://zfin.org/ZDB-GENE-040426-2744	SMAD specific E3 ubiquitin protein ligase 1 [Source:ZFIN;Acc:ZDB-GENE-040426-2744]
ENSDARG00000061451	n4bp2	n4bp2	https://zfin.org/ZDB-GENE-061103-451	NEDD4 binding protein 2 [Source:ZFIN;Acc:ZDB-GENE-061103-451]
ENSDARG00000051975	cd99	cd99	https://zfin.org/ZDB-GENE-061103-391	CD99 molecule [Source:ZFIN;Acc:ZDB-GENE-061103-391]
ENSDARG00000016687	acadvl	acadvl	https://zfin.org/ZDB-GENE-030131-899	acyl-CoA dehydrogenase, very long chain [Source:ZFIN;Acc:ZDB-GENE-030131-899]
ENSDARG00000102937	hspbp1	hspbp1	https://zfin.org/ZDB-GENE-030219-55	HSPA (heat shock 70kDa) binding protein, cytoplasmic cochaperone 1 [Source:ZFIN;Acc:ZDB-GENE-030219-55]
ENSDARG00000060683	lrsam1	lrsam1	https://zfin.org/ZDB-GENE-060526-97	leucine rich repeat and sterile alpha motif containing 1 [Source:ZFIN;Acc:ZDB-GENE-060526-97]
ENSDARG00000099355	si:ch211-238e22.1	si:ch211-238e22.1	https://zfin.org/ZDB-GENE-041210-345	si:ch211-238e22.1 [Source:ZFIN;Acc:ZDB-GENE-041210-345]
ENSDARG00000040298	apoa4b.1	apoa4b.1	https://zfin.org/ZDB-GENE-030131-1263	apolipoprotein A-IV b, tandem duplicate 1 [Source:ZFIN;Acc:ZDB-GENE-030131-1263]
ENSDARG00000003208	pomk	pomk	https://zfin.org/ZDB-GENE-041114-119	protein-O-mannose kinase [Source:ZFIN;Acc:ZDB-GENE-041114-119]
ENSDARG00000090818	CACFD1	CACFD1	https://zfin.org/ZDB-GENE-120215-178	si:ch73-209e20.5 [Source:ZFIN;Acc:ZDB-GENE-120215-178]
ENSDARG00000093597	oip5	oip5	https://zfin.org/ZDB-GENE-090313-328	opa interacting protein 5 [Source:ZFIN;Acc:ZDB-GENE-090313-328]
ENSDARG00000001776	stim2b	stim2b	https://zfin.org/ZDB-GENE-120404-3	stromal interaction molecule 2b [Source:ZFIN;Acc:ZDB-GENE-120404-3]
ENSDARG00000012881	slc4a1a	slc4a1a	https://zfin.org/ZDB-GENE-010525-1	solute carrier family 4 (anion exchanger), member 1a (Diego blood group) [Source:ZFIN;Acc:ZDB-GENE-010525-1]
ENSDARG00000024602	zgc:162964	zgc:162964	https://zfin.org/ZDB-GENE-030131-9798	zgc:162964 [Source:ZFIN;Acc:ZDB-GENE-030131-9798]
ENSDARG00000029242	fbxo3	fbxo3	https://zfin.org/ZDB-GENE-050522-269	F-box protein 3 [Source:ZFIN;Acc:ZDB-GENE-050522-269]
ENSDARG00000078092	limd2	limd2	https://zfin.org/ZDB-GENE-120906-1	LIM domain containing 2 [Source:ZFIN;Acc:ZDB-GENE-120906-1]
ENSDARG00000031956	tmem63a	tmem63a	https://zfin.org/ZDB-GENE-041210-107	transmembrane protein 63A [Source:ZFIN;Acc:ZDB-GENE-041210-107]
ENSDARG00000079202	parp2	parp2	https://zfin.org/ZDB-GENE-031113-6	poly (ADP-ribose) polymerase 2 [Source:ZFIN;Acc:ZDB-GENE-031113-6]
ENSDARG00000004452	tardbpl	tardbpl	https://zfin.org/ZDB-GENE-031030-1	TAR DNA binding protein, like [Source:ZFIN;Acc:ZDB-GENE-031030-1]
ENSDARG00000057899	zgc:114081	zgc:114081	https://zfin.org/ZDB-GENE-050913-78	zgc:114081 [Source:ZFIN;Acc:ZDB-GENE-050913-78]
ENSDARG00000029722	hmgb2a	hmgb2a	https://zfin.org/ZDB-GENE-051120-126	high mobility group box 2a [Source:ZFIN;Acc:ZDB-GENE-051120-126]
ENSDARG00000069363	zgc:153142	zgc:153142	https://zfin.org/ZDB-GENE-061013-507	zgc:153142 [Source:ZFIN;Acc:ZDB-GENE-061013-507]
ENSDARG00000039310	parla	parla	https://zfin.org/ZDB-GENE-050327-8	presenilin associated, rhomboid-like a [Source:ZFIN;Acc:ZDB-GENE-050327-8]
ENSDARG00000104804	si:ch211-238e22.8	si:ch211-238e22.8	https://zfin.org/ZDB-GENE-050419-231	si:ch211-238e22.8 [Source:ZFIN;Acc:ZDB-GENE-050419-231]
ENSDARG00000103889	mettl17	mettl17	https://zfin.org/ZDB-GENE-031118-203	methyltransferase like 17 [Source:ZFIN;Acc:ZDB-GENE-031118-203]
ENSDARG00000030887	phf23a	phf23a	https://zfin.org/ZDB-GENE-050320-67	PHD finger protein 23a [Source:ZFIN;Acc:ZDB-GENE-050320-67]
ENSDARG00000062795	abcb7	abcb7	https://zfin.org/ZDB-GENE-050517-10	ATP-binding cassette, sub-family B (MDR/TAP), member 7 [Source:ZFIN;Acc:ZDB-GENE-050517-10]
ENSDARG00000037905	cacna1aa	cacna1aa	https://zfin.org/ZDB-GENE-040724-26	calcium channel, voltage-dependent, P/Q type, alpha 1A subunit, a [Source:ZFIN;Acc:ZDB-GENE-040724-26]
ENSDARG00000094426	her4.2	her4.2	https://zfin.org/ZDB-GENE-060815-1	hairy-related 4, tandem duplicate 2 [Source:ZFIN;Acc:ZDB-GENE-060815-1]
ENSDARG00000063149	tmtc1	tmtc1	https://zfin.org/ZDB-GENE-070705-219	transmembrane and tetratricopeptide repeat containing 1 [Source:ZFIN;Acc:ZDB-GENE-070705-219]
ENSDARG00000105328	si:dkey-23a13.17	si:dkey-23a13.17	https://zfin.org/ZDB-GENE-160113-52	si:dkey-23a13.17 [Source:ZFIN;Acc:ZDB-GENE-160113-52]
ENSDARG00000068432	si:dkey-56m19.5	si:dkey-56m19.5	https://zfin.org/ZDB-GENE-030131-226	si:dkey-56m19.5 [Source:ZFIN;Acc:ZDB-GENE-030131-226]
ENSDARG00000070770	her4.3	her4.3	https://zfin.org/ZDB-GENE-081030-7	hairy-related 4, tandem duplicate 3 [Source:ZFIN;Acc:ZDB-GENE-081030-7]
ENSDARG00000056729	her4.2	her4.2.1	https://zfin.org/ZDB-GENE-060815-1	hairy-related 4, tandem duplicate 2 [Source:ZFIN;Acc:ZDB-GENE-060815-1]
ENSDARG00000020009	bmp2k	bmp2k	https://zfin.org/ZDB-GENE-041212-72	BMP2 inducible kinase [Source:ZFIN;Acc:ZDB-GENE-041212-72]
ENSDARG00000093456	si:dkey-71p21.9	si:dkey-71p21.9	https://zfin.org/ZDB-GENE-030131-2500	si:dkey-71p21.9 [Source:ZFIN;Acc:ZDB-GENE-030131-2500]
ENSDARG00000056732	her4.1	her4.1	https://zfin.org/ZDB-GENE-980526-521	hairy-related 4, tandem duplicate 1 [Source:ZFIN;Acc:ZDB-GENE-980526-521]
ENSDARG00000062884	map3k2	map3k2	https://zfin.org/ZDB-GENE-120215-96	mitogen-activated protein kinase kinase kinase 2 [Source:ZFIN;Acc:ZDB-GENE-120215-96]
ENSDARG00000059116	heatr5b	heatr5b	https://zfin.org/ZDB-GENE-130530-676	HEAT repeat containing 5B [Source:ZFIN;Acc:ZDB-GENE-130530-676]
ENSDARG00000074663	zgc:162183	zgc:162183	https://zfin.org/ZDB-GENE-070410-30	zgc:162183 [Source:ZFIN;Acc:ZDB-GENE-070410-30]
ENSDARG00000009822	her4.4	her4.4	https://zfin.org/ZDB-GENE-081031-104	hairy-related 4, tandem duplicate 4 [Source:ZFIN;Acc:ZDB-GENE-081031-104]
ENSDARG00000012078	meis1b	meis1b	https://zfin.org/ZDB-GENE-020122-1	Meis homeobox 1 b [Source:ZFIN;Acc:ZDB-GENE-020122-1]
ENSDARG00000011233	pcyt1aa	pcyt1aa	https://zfin.org/ZDB-GENE-050417-108	phosphate cytidylyltransferase 1, choline, alpha a [Source:ZFIN;Acc:ZDB-GENE-050417-108]
ENSDARG00000104350	si:dkey-68o6.6	si:dkey-68o6.6	https://zfin.org/ZDB-GENE-141212-381	si:dkey-68o6.6 [Source:ZFIN;Acc:ZDB-GENE-141212-381]
ENSDARG00000100155	si:ch211-217i17.1	si:ch211-217i17.1	https://zfin.org/ZDB-GENE-131122-15	si:ch211-217i17.1 [Source:ZFIN;Acc:ZDB-GENE-131122-15]
ENSDARG00000094191	nup37	nup37	https://zfin.org/ZDB-GENE-040718-363	nucleoporin 37 [Source:ZFIN;Acc:ZDB-GENE-040718-363]
ENSDARG00000024306	zbed4	zbed4	https://zfin.org/ZDB-GENE-041210-305	zinc finger, BED-type containing 4 [Source:ZFIN;Acc:ZDB-GENE-041210-305]
ENSDARG00000053370	eif3jb	eif3jb	https://zfin.org/ZDB-GENE-040426-2900	eukaryotic translation initiation factor 3, subunit Jb [Source:ZFIN;Acc:ZDB-GENE-040426-2900]
ENSDARG00000101061	eif2a	eif2a	https://zfin.org/ZDB-GENE-050626-52	eukaryotic translation initiation factor 2A [Source:ZFIN;Acc:ZDB-GENE-050626-52]
ENSDARG00000006617	napga	napga	https://zfin.org/ZDB-GENE-050320-46	N-ethylmaleimide-sensitive factor attachment protein, gamma a [Source:ZFIN;Acc:ZDB-GENE-050320-46]
ENSDARG00000040881	hnrnph1	hnrnph1	https://zfin.org/ZDB-GENE-040426-1856	heterogeneous nuclear ribonucleoprotein H1 [Source:ZFIN;Acc:ZDB-GENE-040426-1856]
ENSDARG00000062806	ttll9	ttll9	https://zfin.org/ZDB-GENE-030131-1582	tubulin tyrosine ligase-like family, member 9 [Source:ZFIN;Acc:ZDB-GENE-030131-1582]
ENSDARG00000098802	map7d1a	map7d1a	https://zfin.org/ZDB-GENE-060503-22	MAP7 domain containing 1a [Source:ZFIN;Acc:ZDB-GENE-060503-22]
ENSDARG00000029944	parpbp	parpbp	https://zfin.org/ZDB-GENE-060421-5714	PARP1 binding protein [Source:ZFIN;Acc:ZDB-GENE-060421-5714]
ENSDARG00000100363	dcun1d5	dcun1d5	https://zfin.org/ZDB-GENE-040426-2603	DCN1, defective in cullin neddylation 1, domain containing 5 (S. cerevisiae) [Source:ZFIN;Acc:ZDB-GENE-040426-2603]
ENSDARG00000057984	eps8l1	eps8l1	https://zfin.org/ZDB-GENE-050306-14	eps8-like1 [Source:ZFIN;Acc:ZDB-GENE-050306-14]
ENSDARG00000077265	wdr89	wdr89	https://zfin.org/ZDB-GENE-090319-3	WD repeat domain 89 [Source:ZFIN;Acc:ZDB-GENE-090319-3]
ENSDARG00000077653	rabl6b	rabl6b	https://zfin.org/ZDB-GENE-081104-97	RAB, member RAS oncogene family-like 6b [Source:ZFIN;Acc:ZDB-GENE-081104-97]
ENSDARG00000104710	psip1	psip1	https://zfin.org/ZDB-GENE-050522-104	PC4 and SFRS1 interacting protein 1 [Source:ZFIN;Acc:ZDB-GENE-050522-104]
ENSDARG00000101540	fgf3	fgf3	https://zfin.org/ZDB-GENE-980526-178	fibroblast growth factor 3 [Source:ZFIN;Acc:ZDB-GENE-980526-178]
ENSDARG00000097429	si:dkey-192l18.11	si:dkey-192l18.11	https://zfin.org/ZDB-GENE-131121-477	si:dkey-192l18.11 [Source:ZFIN;Acc:ZDB-GENE-131121-477]
ENSDARG00000103154	TRIM35	TRIM35.2	https://zfin.org/ZDB-GENE-131119-96	si:ch73-144l3.1 [Source:ZFIN;Acc:ZDB-GENE-131119-96]
ENSDARG00000071567	TSTD1	TSTD1	https://zfin.org/ZDB-GENE-081107-63	si:dkey-34l15.1 [Source:ZFIN;Acc:ZDB-GENE-081107-63]
ENSDARG00000101474	snapc3	snapc3	https://zfin.org/ZDB-GENE-040426-971	small nuclear RNA activating complex, polypeptide 3 [Source:ZFIN;Acc:ZDB-GENE-040426-971]
ENSDARG00000056347	rab3aa	rab3aa	https://zfin.org/ZDB-GENE-040801-2	RAB3A, member RAS oncogene family, a [Source:ZFIN;Acc:ZDB-GENE-040801-2]
ENSDARG00000101720	si:dkey-23a13.18	si:dkey-23a13.18	https://zfin.org/ZDB-GENE-160113-116	si:dkey-23a13.18 [Source:ZFIN;Acc:ZDB-GENE-160113-116]
ENSDARG00000029600	wdr32	wdr32	https://zfin.org/ZDB-GENE-040426-2314	WD repeat domain 32 [Source:ZFIN;Acc:ZDB-GENE-040426-2314]
ENSDARG00000039422	fuom	fuom	https://zfin.org/ZDB-GENE-030616-618	fucose mutarotase [Source:ZFIN;Acc:ZDB-GENE-030616-618]
ENSDARG00000059987	dnah12	dnah12	https://zfin.org/ZDB-GENE-090311-9	dynein, axonemal, heavy chain 12 [Source:ZFIN;Acc:ZDB-GENE-090311-9]
ENSDARG00000060430	zfyve28	zfyve28	https://zfin.org/ZDB-GENE-061103-208	zinc finger, FYVE domain containing 28 [Source:ZFIN;Acc:ZDB-GENE-061103-208]
ENSDARG00000016231	bcap29	bcap29	https://zfin.org/ZDB-GENE-050522-468	B-cell receptor-associated protein 29 [Source:ZFIN;Acc:ZDB-GENE-050522-468]
ENSDARG00000013596	brd1a	brd1a	https://zfin.org/ZDB-GENE-041008-168	bromodomain containing 1a [Source:ZFIN;Acc:ZDB-GENE-041008-168]
ENSDARG00000012035	zgc:100832	zgc:100832	https://zfin.org/ZDB-GENE-040801-53	zgc:100832 [Source:ZFIN;Acc:ZDB-GENE-040801-53]
ENSDARG00000074323	efcab2	efcab2	https://zfin.org/ZDB-GENE-070521-5	EF-hand calcium binding domain 2 [Source:ZFIN;Acc:ZDB-GENE-070521-5]
ENSDARG00000060534	sgpp1	sgpp1	https://zfin.org/ZDB-GENE-090319-2	sphingosine-1-phosphate phosphatase 1 [Source:ZFIN;Acc:ZDB-GENE-090319-2]
ENSDARG00000099920	si:dkey-23a13.19	si:dkey-23a13.19	https://zfin.org/ZDB-GENE-160113-37	si:dkey-23a13.19 [Source:ZFIN;Acc:ZDB-GENE-160113-37]
ENSDARG00000028442	rsg1	rsg1	https://zfin.org/ZDB-GENE-040912-80	REM2 and RAB-like small GTPase 1 [Source:ZFIN;Acc:ZDB-GENE-040912-80]
ENSDARG00000074050	efnb2b	efnb2b	https://zfin.org/ZDB-GENE-010618-1	ephrin-B2b [Source:ZFIN;Acc:ZDB-GENE-010618-1]
ENSDARG00000091471	ECT2L	ECT2L	https://zfin.org/	epithelial cell transforming 2 like [Source:HGNC Symbol;Acc:HGNC:21118]
ENSDARG00000020625	jak1	jak1	https://zfin.org/ZDB-GENE-980526-142	Janus kinase 1 [Source:ZFIN;Acc:ZDB-GENE-980526-142]
ENSDARG00000019364	mbip	mbip	https://zfin.org/ZDB-GENE-060810-43	MAP3K12 binding inhibitory protein 1 [Source:ZFIN;Acc:ZDB-GENE-060810-43]
ENSDARG00000037142	zgc:153146	zgc:153146	https://zfin.org/ZDB-GENE-060825-339	zgc:153146 [Source:ZFIN;Acc:ZDB-GENE-060825-339]
ENSDARG00000001785	irx2a	irx2a	https://zfin.org/ZDB-GENE-040426-1446	iroquois homeobox 2a [Source:ZFIN;Acc:ZDB-GENE-040426-1446]
ENSDARG00000002369	UBC	UBC	https://zfin.org/ZDB-GENE-030131-8486	si:ch211-202a12.4 [Source:ZFIN;Acc:ZDB-GENE-030131-8486]
ENSDARG00000062385	flcn	flcn	https://zfin.org/ZDB-GENE-060421-3470	folliculin [Source:ZFIN;Acc:ZDB-GENE-060421-3470]
ENSDARG00000093313	ubb	ubb	https://zfin.org/ZDB-GENE-050411-10	ubiquitin B [Source:ZFIN;Acc:ZDB-GENE-050411-10]
ENSDARG00000104287	oraov1	oraov1	https://zfin.org/ZDB-GENE-030729-33	oral cancer overexpressed 1 [Source:ZFIN;Acc:ZDB-GENE-030729-33]
ENSDARG00000035607	ankle2	ankle2	https://zfin.org/ZDB-GENE-030131-6090	ankyrin repeat and LEM domain containing 2 [Source:ZFIN;Acc:ZDB-GENE-030131-6090]
ENSDARG00000074636	cep170b	cep170b	https://zfin.org/ZDB-GENE-131127-515	centrosomal protein 170B [Source:ZFIN;Acc:ZDB-GENE-131127-515]
ENSDARG00000078206	zgc:171506	zgc:171506	https://zfin.org/ZDB-GENE-080204-96	zgc:171506 [Source:ZFIN;Acc:ZDB-GENE-080204-96]
ENSDARG00000097518	si:ch211-205j18.1	si:ch211-205j18.1	https://zfin.org/ZDB-GENE-131119-98	si:ch211-205j18.1 [Source:ZFIN;Acc:ZDB-GENE-131119-98]
ENSDARG00000059653	kdm2aa	kdm2aa	https://zfin.org/ZDB-GENE-061215-144	lysine (K)-specific demethylase 2Aa [Source:ZFIN;Acc:ZDB-GENE-061215-144]
ENSDARG00000093156	si:ch73-21g5.7	si:ch73-21g5.7	https://zfin.org/ZDB-GENE-081104-260	si:ch73-21g5.7 [Source:ZFIN;Acc:ZDB-GENE-081104-260]
ENSDARG00000098176	si:rp71-1h20.5	si:rp71-1h20.5	https://zfin.org/ZDB-GENE-030131-7869	si:rp71-1h20.5 [Source:ZFIN;Acc:ZDB-GENE-030131-7869]
ENSDARG00000102436	WIZ	WIZ	https://zfin.org/ZDB-GENE-131126-2	si:ch211-194b1.1 [Source:ZFIN;Acc:ZDB-GENE-131126-2]
ENSDARG00000063068	syne1b	syne1b	https://zfin.org/ZDB-GENE-071218-4	spectrin repeat containing, nuclear envelope 1b [Source:ZFIN;Acc:ZDB-GENE-071218-4]
ENSDARG00000073716	cpxm1a	cpxm1a	https://zfin.org/ZDB-GENE-030131-5284	carboxypeptidase X (M14 family), member 1a [Source:ZFIN;Acc:ZDB-GENE-030131-5284]
ENSDARG00000037645	zgc:173570	zgc:173570	https://zfin.org/ZDB-GENE-080218-15	zgc:173570 [Source:ZFIN;Acc:ZDB-GENE-080218-15]
ENSDARG00000027159	fbxo28	fbxo28	https://zfin.org/ZDB-GENE-030131-4665	F-box protein 28 [Source:ZFIN;Acc:ZDB-GENE-030131-4665]
ENSDARG00000053070	gosr2	gosr2	https://zfin.org/ZDB-GENE-030131-3290	golgi SNAP receptor complex member 2 [Source:ZFIN;Acc:ZDB-GENE-030131-3290]
ENSDARG00000044142	acss1	acss1	https://zfin.org/ZDB-GENE-050320-139	acyl-CoA synthetase short-chain family member 1 [Source:ZFIN;Acc:ZDB-GENE-050320-139]
ENSDARG00000087681	DRAXIN	DRAXIN	https://zfin.org/ZDB-GENE-081104-352	si:dkey-1c11.1 [Source:ZFIN;Acc:ZDB-GENE-081104-352]
ENSDARG00000037928	ddx42	ddx42	https://zfin.org/ZDB-GENE-050706-53	DEAD (Asp-Glu-Ala-Asp) box helicase 42 [Source:ZFIN;Acc:ZDB-GENE-050706-53]
ENSDARG00000002402	ercc3	ercc3	https://zfin.org/ZDB-GENE-030131-3043	excision repair cross-complementation group 3 [Source:ZFIN;Acc:ZDB-GENE-030131-3043]
ENSDARG00000098223	si:ch211-207m11.3	si:ch211-207m11.3	https://zfin.org/ZDB-GENE-060503-210	si:ch211-207m11.3 [Source:ZFIN;Acc:ZDB-GENE-060503-210]
ENSDARG00000060177	vcpip1	vcpip1	https://zfin.org/ZDB-GENE-070912-613	valosin containing protein (p97)/p47 complex interacting protein 1 [Source:ZFIN;Acc:ZDB-GENE-070912-613]
ENSDARG00000018319	arglu1b	arglu1b	https://zfin.org/ZDB-GENE-040426-736	arginine and glutamate rich 1b [Source:ZFIN;Acc:ZDB-GENE-040426-736]
ENSDARG00000018956	tmem39b	tmem39b	https://zfin.org/ZDB-GENE-030131-6042	transmembrane protein 39B [Source:ZFIN;Acc:ZDB-GENE-030131-6042]
ENSDARG00000012953	mob1bb	mob1bb	https://zfin.org/ZDB-GENE-050522-58	MOB kinase activator 1Bb [Source:ZFIN;Acc:ZDB-GENE-050522-58]
ENSDARG00000006260	tuba8l4	tuba8l4	https://zfin.org/ZDB-GENE-040426-860	tubulin, alpha 8 like 4 [Source:ZFIN;Acc:ZDB-GENE-040426-860]
ENSDARG00000061051	brinp3a.2	brinp3a.2	https://zfin.org/ZDB-GENE-131119-53	bone morphogenetic protein/retinoic acid inducible neural-specific 3a, tandem duplicate 2 [Source:ZFIN;Acc:ZDB-GENE-131119-53]
ENSDARG00000053558	rtkn2a	rtkn2a	https://zfin.org/ZDB-GENE-041010-225	rhotekin 2a [Source:ZFIN;Acc:ZDB-GENE-041010-225]
ENSDARG00000013343	kif26ba	kif26ba	https://zfin.org/ZDB-GENE-070521-4	kinesin family member 26Ba [Source:ZFIN;Acc:ZDB-GENE-070521-4]
ENSDARG00000100906	HIST2H2AB	HIST2H2AB.1	https://zfin.org/ZDB-GENE-081205-1	zgc:195633 [Source:ZFIN;Acc:ZDB-GENE-081205-1]
ENSDARG00000045510	tbc1d22a	tbc1d22a	https://zfin.org/ZDB-GENE-041114-144	TBC1 domain family, member 22a [Source:ZFIN;Acc:ZDB-GENE-041114-144]
ENSDARG00000097485	CFAP99	CFAP99	https://zfin.org/	cilia and flagella associated protein 99 [Source:HGNC Symbol;Acc:HGNC:51180]
ENSDARG00000100494	pbx1a	pbx1a	https://zfin.org/ZDB-GENE-000405-1	pre-B-cell leukemia homeobox 1a [Source:ZFIN;Acc:ZDB-GENE-000405-1]
ENSDARG00000103155	ext1a	ext1a	https://zfin.org/ZDB-GENE-050211-3	exostosin glycosyltransferase 1a [Source:ZFIN;Acc:ZDB-GENE-050211-3]
ENSDARG00000060610	pcdh7b	pcdh7b	https://zfin.org/ZDB-GENE-081104-299	protocadherin 7b [Source:ZFIN;Acc:ZDB-GENE-081104-299]
ENSDARG00000030087	nfkbib	nfkbib	https://zfin.org/ZDB-GENE-070705-529	nuclear factor of kappa light polypeptide gene enhancer in B-cells inhibitor, beta [Source:ZFIN;Acc:ZDB-GENE-070705-529]
ENSDARG00000079306	rlim	rlim	https://zfin.org/ZDB-GENE-120809-2	ring finger protein, LIM domain interacting [Source:ZFIN;Acc:ZDB-GENE-120809-2]
ENSDARG00000007231	ryk	ryk	https://zfin.org/ZDB-GENE-070209-277	receptor-like tyrosine kinase [Source:ZFIN;Acc:ZDB-GENE-070209-277]
ENSDARG00000008305	hand2	hand2	https://zfin.org/ZDB-GENE-000511-1	heart and neural crest derivatives expressed 2 [Source:ZFIN;Acc:ZDB-GENE-000511-1]
ENSDARG00000003827	snapc1b	snapc1b	https://zfin.org/ZDB-GENE-040426-716	small nuclear RNA activating complex, polypeptide 1b [Source:ZFIN;Acc:ZDB-GENE-040426-716]
ENSDARG00000101831	irx1a	irx1a	https://zfin.org/ZDB-GENE-040707-1	iroquois homeobox 1a [Source:ZFIN;Acc:ZDB-GENE-040707-1]
ENSDARG00000099382	si:ch211-209n20.1	si:ch211-209n20.1	https://zfin.org/ZDB-GENE-070705-98	si:ch211-209n20.1 [Source:ZFIN;Acc:ZDB-GENE-070705-98]
ENSDARG00000006691	rpl12	rpl12	https://zfin.org/ZDB-GENE-030131-5297	ribosomal protein L12 [Source:ZFIN;Acc:ZDB-GENE-030131-5297]
ENSDARG00000101989	thrap3a	thrap3a	https://zfin.org/ZDB-GENE-030219-79	thyroid hormone receptor associated protein 3a [Source:ZFIN;Acc:ZDB-GENE-030219-79]
ENSDARG00000100179	gb:ai877918	gb:ai877918	https://zfin.org/ZDB-GENE-090506-8	expressed sequence AI877918 [Source:ZFIN;Acc:ZDB-GENE-090506-8]
ENSDARG00000005891	cyb5r3	cyb5r3	https://zfin.org/ZDB-GENE-030131-3281	cytochrome b5 reductase 3 [Source:ZFIN;Acc:ZDB-GENE-030131-3281]
ENSDARG00000002790	ap2m1a	ap2m1a	https://zfin.org/ZDB-GENE-030131-9784	adaptor-related protein complex 2, mu 1 subunit, a [Source:ZFIN;Acc:ZDB-GENE-030131-9784]
ENSDARG00000053159	zgc:110626	zgc:110626	https://zfin.org/ZDB-GENE-050417-447	zgc:110626 [Source:ZFIN;Acc:ZDB-GENE-050417-447]
ENSDARG00000080006	tmem41b	tmem41b	https://zfin.org/ZDB-GENE-061215-138	transmembrane protein 41B [Source:ZFIN;Acc:ZDB-GENE-061215-138]
ENSDARG00000011222	ccdc28b	ccdc28b	https://zfin.org/ZDB-GENE-060208-3	coiled-coil domain containing 28B [Source:ZFIN;Acc:ZDB-GENE-060208-3]
ENSDARG00000089936	sepw2b	sepw2b	https://zfin.org/ZDB-GENE-030428-2	selenoprotein W, 2b [Source:ZFIN;Acc:ZDB-GENE-030428-2]
ENSDARG00000040059	gbp	gbp	https://zfin.org/ZDB-GENE-990714-7	glycogen synthase kinase binding protein [Source:ZFIN;Acc:ZDB-GENE-990714-7]
ENSDARG00000061093	phldb1a	phldb1a	https://zfin.org/ZDB-GENE-060526-272	pleckstrin homology-like domain, family B, member 1a [Source:ZFIN;Acc:ZDB-GENE-060526-272]
ENSDARG00000093804	sst6	sst6	https://zfin.org/ZDB-GENE-081022-199	somatostatin 6 [Source:ZFIN;Acc:ZDB-GENE-081022-199]
ENSDARG00000007477	fbxo8	fbxo8	https://zfin.org/ZDB-GENE-060421-7091	F-box protein 8 [Source:ZFIN;Acc:ZDB-GENE-060421-7091]
ENSDARG00000015607	si:ch211-220f21.2	si:ch211-220f21.2	https://zfin.org/ZDB-GENE-160113-17	si:ch211-220f21.2 [Source:ZFIN;Acc:ZDB-GENE-160113-17]
ENSDARG00000054890	rgra	rgra	https://zfin.org/ZDB-GENE-040924-6	retinal G protein coupled receptor a [Source:ZFIN;Acc:ZDB-GENE-040924-6]
ENSDARG00000105372	si:ch211-220f21.1	si:ch211-220f21.1	https://zfin.org/ZDB-GENE-160113-32	si:ch211-220f21.1 [Source:ZFIN;Acc:ZDB-GENE-160113-32]
ENSDARG00000105439	si:dkey-23a13.3	si:dkey-23a13.3	https://zfin.org/ZDB-GENE-160113-8	si:dkey-23a13.3 [Source:ZFIN;Acc:ZDB-GENE-160113-8]
ENSDARG00000054680	chrna9	chrna9	https://zfin.org/ZDB-GENE-090312-63	cholinergic receptor, nicotinic, alpha 9 [Source:ZFIN;Acc:ZDB-GENE-090312-63]
ENSDARG00000055252	snap23.2	snap23.2	https://zfin.org/ZDB-GENE-051030-75	synaptosomal-associated protein 23.2 [Source:ZFIN;Acc:ZDB-GENE-051030-75]
ENSDARG00000105508	si:dkey-23a13.21	si:dkey-23a13.21	https://zfin.org/ZDB-GENE-160113-53	si:dkey-23a13.21 [Source:ZFIN;Acc:ZDB-GENE-160113-53]
ENSDARG00000034534	atp6v1aa	atp6v1aa	https://zfin.org/ZDB-GENE-040426-1143	ATPase, H+ transporting, lysosomal, V1 subunit Aa [Source:ZFIN;Acc:ZDB-GENE-040426-1143]
ENSDARG00000105353	si:ch1073-35f11.1	si:ch1073-35f11.1	https://zfin.org/ZDB-GENE-160113-101	si:ch1073-35f11.1 [Source:ZFIN;Acc:ZDB-GENE-160113-101]
ENSDARG00000011301	nae1	nae1	https://zfin.org/ZDB-GENE-040426-1552	nedd8 activating enzyme E1 subunit 1 [Source:ZFIN;Acc:ZDB-GENE-040426-1552]
ENSDARG00000060168	fam160b1	fam160b1	https://zfin.org/ZDB-GENE-070424-63	family with sequence similarity 160, member B1 [Source:ZFIN;Acc:ZDB-GENE-070424-63]
ENSDARG00000022983	ccdc28a	ccdc28a	https://zfin.org/ZDB-GENE-030131-5007	coiled-coil domain containing 28A [Source:ZFIN;Acc:ZDB-GENE-030131-5007]
ENSDARG00000105430	si:ch73-368j24.11	si:ch73-368j24.11	https://zfin.org/ZDB-GENE-160113-46	si:ch73-368j24.11 [Source:ZFIN;Acc:ZDB-GENE-160113-46]
ENSDARG00000062511	golga3	golga3	https://zfin.org/ZDB-GENE-060526-252	golgin A3 [Source:ZFIN;Acc:ZDB-GENE-060526-252]
ENSDARG00000104374	smchd1	smchd1	https://zfin.org/ZDB-GENE-050211-6	structural maintenance of chromosomes flexible hinge domain containing 1 [Source:ZFIN;Acc:ZDB-GENE-050211-6]
ENSDARG00000105459	HIST2H3D	HIST2H3D	https://zfin.org/ZDB-GENE-160113-84	si:ch73-368j24.5 [Source:ZFIN;Acc:ZDB-GENE-160113-84]
ENSDARG00000093874	si:dkey-196j8.2	si:dkey-196j8.2	https://zfin.org/ZDB-GENE-081107-58	si:dkey-196j8.2 [Source:ZFIN;Acc:ZDB-GENE-081107-58]
ENSDARG00000069374	sh2d4ba	sh2d4ba	https://zfin.org/ZDB-GENE-090313-53	SH2 domain containing 4Ba [Source:ZFIN;Acc:ZDB-GENE-090313-53]
ENSDARG00000094792	twf2a	twf2a	https://zfin.org/ZDB-GENE-030131-7638	twinfilin actin-binding protein 2a [Source:ZFIN;Acc:ZDB-GENE-030131-7638]
ENSDARG00000104668	plxna1b	plxna1b	https://zfin.org/ZDB-GENE-061007-1	plexin A1b [Source:ZFIN;Acc:ZDB-GENE-061007-1]
ENSDARG00000104700	acvr2ab	acvr2ab	https://zfin.org/ZDB-GENE-120215-23	activin A receptor, type IIAb [Source:ZFIN;Acc:ZDB-GENE-120215-23]
ENSDARG00000012874	snap23.1	snap23.1	https://zfin.org/ZDB-GENE-040426-883	synaptosomal-associated protein 23.1 [Source:ZFIN;Acc:ZDB-GENE-040426-883]
ENSDARG00000069496	arl2	arl2	https://zfin.org/ZDB-GENE-041010-19	ADP-ribosylation factor-like 2 [Source:ZFIN;Acc:ZDB-GENE-041010-19]
ENSDARG00000101593	zgc:163077	zgc:163077	https://zfin.org/ZDB-GENE-070521-6	zgc:163077 [Source:ZFIN;Acc:ZDB-GENE-070521-6]
ENSDARG00000017703	paqr3a	paqr3a	https://zfin.org/ZDB-GENE-040426-1667	progestin and adipoQ receptor family member IIIa [Source:ZFIN;Acc:ZDB-GENE-040426-1667]
ENSDARG00000101906	zgc:113442	zgc:113442	https://zfin.org/ZDB-GENE-050227-2	zgc:113442 [Source:ZFIN;Acc:ZDB-GENE-050227-2]
ENSDARG00000105182	ntan1	ntan1	https://zfin.org/ZDB-GENE-040426-1896	N-terminal asparagine amidase [Source:ZFIN;Acc:ZDB-GENE-040426-1896]
ENSDARG00000088505	fam217b	fam217b	https://zfin.org/ZDB-GENE-090313-236	family with sequence similarity 217, member B [Source:ZFIN;Acc:ZDB-GENE-090313-236]
ENSDARG00000103053	si:ch211-67o16.8	si:ch211-67o16.8	https://zfin.org/ZDB-GENE-141216-25	si:ch211-67o16.8 [Source:ZFIN;Acc:ZDB-GENE-141216-25]
ENSDARG00000101161	orc4	orc4	https://zfin.org/ZDB-GENE-040426-2224	origin recognition complex, subunit 4 [Source:ZFIN;Acc:ZDB-GENE-040426-2224]
ENSDARG00000038228	sepw2a	sepw2a	https://zfin.org/ZDB-GENE-030428-1	selenoprotein W, 2a [Source:ZFIN;Acc:ZDB-GENE-030428-1]
ENSDARG00000014083	wdr82	wdr82	https://zfin.org/ZDB-GENE-030131-333	WD repeat domain 82 [Source:ZFIN;Acc:ZDB-GENE-030131-333]
ENSDARG00000062831	si:ch73-22o12.1	si:ch73-22o12.1	https://zfin.org/ZDB-GENE-110411-27	si:ch73-22o12.1 [Source:ZFIN;Acc:ZDB-GENE-110411-27]
ENSDARG00000077810	otud4	otud4	https://zfin.org/ZDB-GENE-030131-5338	OTU deubiquitinase 4 [Source:ZFIN;Acc:ZDB-GENE-030131-5338]
ENSDARG00000060551	rps6ka5	rps6ka5	https://zfin.org/ZDB-GENE-130530-693	ribosomal protein S6 kinase, polypeptide 5 [Source:ZFIN;Acc:ZDB-GENE-130530-693]
ENSDARG00000004680	dnajb6a	dnajb6a	https://zfin.org/ZDB-GENE-040718-45	DnaJ (Hsp40) homolog, subfamily B, member 6a [Source:ZFIN;Acc:ZDB-GENE-040718-45]
ENSDARG00000057884	zgc:114174	zgc:114174	https://zfin.org/ZDB-GENE-050626-103	zgc:114174 [Source:ZFIN;Acc:ZDB-GENE-050626-103]
ENSDARG00000099776	glula	glula	https://zfin.org/ZDB-GENE-030131-688	glutamate-ammonia ligase (glutamine synthase) a [Source:ZFIN;Acc:ZDB-GENE-030131-688]
ENSDARG00000044807	dck	dck	https://zfin.org/ZDB-GENE-041024-3	deoxycytidine kinase [Source:ZFIN;Acc:ZDB-GENE-041024-3]
ENSDARG00000022698	lad1	lad1	https://zfin.org/ZDB-GENE-030616-268	ladinin [Source:ZFIN;Acc:ZDB-GENE-030616-268]
ENSDARG00000099995	apbb2b	apbb2b	https://zfin.org/ZDB-GENE-090313-73	amyloid beta (A4) precursor protein-binding, family B, member 2b [Source:ZFIN;Acc:ZDB-GENE-090313-73]
ENSDARG00000079280	dhrsx	dhrsx	https://zfin.org/ZDB-GENE-060620-2	dehydrogenase/reductase (SDR family) X-linked [Source:ZFIN;Acc:ZDB-GENE-060620-2]
ENSDARG00000092290	GSG2	GSG2	https://zfin.org/ZDB-GENE-090313-379	si:dkeyp-26a9.2 [Source:ZFIN;Acc:ZDB-GENE-090313-379]
ENSDARG00000079779	radil	radil	https://zfin.org/ZDB-GENE-071206-1	Ras association and DIL domains [Source:ZFIN;Acc:ZDB-GENE-071206-1]
ENSDARG00000105348	si:ch211-277c7.7	si:ch211-277c7.7	https://zfin.org/ZDB-GENE-160114-41	si:ch211-277c7.7 [Source:ZFIN;Acc:ZDB-GENE-160114-41]
ENSDARG00000020610	tnnt2a	tnnt2a	https://zfin.org/ZDB-GENE-000626-1	troponin T type 2a (cardiac) [Source:ZFIN;Acc:ZDB-GENE-000626-1]
ENSDARG00000015239	prp19	prp19	https://zfin.org/ZDB-GENE-030131-263	PRP19/PSO4 homolog (S. cerevisiae) [Source:ZFIN;Acc:ZDB-GENE-030131-263]
ENSDARG00000088708	ngfra	ngfra	https://zfin.org/ZDB-GENE-050928-1	nerve growth factor receptor a (TNFR superfamily, member 16) [Source:ZFIN;Acc:ZDB-GENE-050928-1]
ENSDARG00000005482	rapgef2	rapgef2	https://zfin.org/ZDB-GENE-030131-6959	Rap guanine nucleotide exchange factor (GEF) 2 [Source:ZFIN;Acc:ZDB-GENE-030131-6959]
ENSDARG00000045486	pawr	pawr	https://zfin.org/ZDB-GENE-041010-108	PRKC, apoptosis, WT1, regulator [Source:ZFIN;Acc:ZDB-GENE-041010-108]
ENSDARG00000102959	zgc:171220	zgc:171220	https://zfin.org/ZDB-GENE-071004-11	zgc:171220 [Source:ZFIN;Acc:ZDB-GENE-071004-11]
ENSDARG00000055099	fam184b	fam184b	https://zfin.org/ZDB-GENE-090313-380	family with sequence similarity 184, member B [Source:ZFIN;Acc:ZDB-GENE-090313-380]
ENSDARG00000071384	slc7a11	slc7a11	https://zfin.org/ZDB-GENE-150416-1	solute carrier family 7 (anionic amino acid transporter light chain, xc- system), member 11 [Source:ZFIN;Acc:ZDB-GENE-150416-1]
ENSDARG00000101093	zgc:162971	zgc:162971	https://zfin.org/ZDB-GENE-070424-48	zgc:162971 [Source:ZFIN;Acc:ZDB-GENE-070424-48]
ENSDARG00000055938	tspan14	tspan14	https://zfin.org/ZDB-GENE-060825-329	tetraspanin 14 [Source:ZFIN;Acc:ZDB-GENE-060825-329]
ENSDARG00000039022	stk25b	stk25b	https://zfin.org/ZDB-GENE-040426-2537	serine/threonine kinase 25b [Source:ZFIN;Acc:ZDB-GENE-040426-2537]
ENSDARG00000101320	si:dkey-50i6.5	si:dkey-50i6.5	https://zfin.org/ZDB-GENE-081031-53	si:dkey-50i6.5 [Source:ZFIN;Acc:ZDB-GENE-081031-53]
ENSDARG00000103196	zgc:113343	zgc:113343	https://zfin.org/ZDB-GENE-050327-90	zgc:113343 [Source:ZFIN;Acc:ZDB-GENE-050327-90]
ENSDARG00000069169	cerk	cerk	https://zfin.org/ZDB-GENE-041210-210	ceramide kinase [Source:ZFIN;Acc:ZDB-GENE-041210-210]
ENSDARG00000097000	si:ch211-66i8.3	si:ch211-66i8.3	https://zfin.org/ZDB-GENE-131120-31	si:ch211-66i8.3 [Source:ZFIN;Acc:ZDB-GENE-131120-31]
ENSDARG00000058050	smyd3	smyd3	https://zfin.org/ZDB-GENE-051120-138	SET and MYND domain containing 3 [Source:ZFIN;Acc:ZDB-GENE-051120-138]
ENSDARG00000036700	si:ch211-114n24.6	si:ch211-114n24.6	https://zfin.org/ZDB-GENE-120214-26	si:ch211-114n24.6 [Source:ZFIN;Acc:ZDB-GENE-120214-26]
ENSDARG00000017762	srrt	srrt	https://zfin.org/ZDB-GENE-020419-13	serrate RNA effector molecule homolog (Arabidopsis) [Source:ZFIN;Acc:ZDB-GENE-020419-13]
ENSDARG00000008706	paip2b	paip2b	https://zfin.org/ZDB-GENE-040426-1736	poly(A) binding protein interacting protein 2B [Source:ZFIN;Acc:ZDB-GENE-040426-1736]
ENSDARG00000063255	btbd11a	btbd11a	https://zfin.org/ZDB-GENE-050419-142	BTB (POZ) domain containing 11a [Source:ZFIN;Acc:ZDB-GENE-050419-142]
ENSDARG00000101637	ccnd1	ccnd1	https://zfin.org/ZDB-GENE-980526-176	cyclin D1 [Source:ZFIN;Acc:ZDB-GENE-980526-176]
ENSDARG00000070108	dek	dek	https://zfin.org/ZDB-GENE-060512-191	DEK proto-oncogene [Source:ZFIN;Acc:ZDB-GENE-060512-191]
ENSDARG00000003287	wdr12	wdr12	https://zfin.org/ZDB-GENE-030131-371	WD repeat domain 12 [Source:ZFIN;Acc:ZDB-GENE-030131-371]
ENSDARG00000019191	sept12	sept12	https://zfin.org/ZDB-GENE-120215-68	septin 12 [Source:ZFIN;Acc:ZDB-GENE-120215-68]
ENSDARG00000094457	si:dkey-222f8.6	si:dkey-222f8.6	https://zfin.org/ZDB-GENE-041210-87	si:dkey-222f8.6 [Source:ZFIN;Acc:ZDB-GENE-041210-87]
ENSDARG00000092483	iqcc	iqcc	https://zfin.org/ZDB-GENE-090313-325	IQ motif containing C [Source:ZFIN;Acc:ZDB-GENE-090313-325]
ENSDARG00000008372	spred2b	spred2b	https://zfin.org/ZDB-GENE-040426-2342	sprouty-related, EVH1 domain containing 2b [Source:ZFIN;Acc:ZDB-GENE-040426-2342]
ENSDARG00000059768	gpatch8	gpatch8	https://zfin.org/ZDB-GENE-030131-6966	G patch domain containing 8 [Source:ZFIN;Acc:ZDB-GENE-030131-6966]
ENSDARG00000019717	pbx2	pbx2	https://zfin.org/ZDB-GENE-000405-5	pre-B-cell leukemia homeobox 2 [Source:ZFIN;Acc:ZDB-GENE-000405-5]
ENSDARG00000017489	zgc:123068	zgc:123068	https://zfin.org/ZDB-GENE-051030-98	zgc:123068 [Source:ZFIN;Acc:ZDB-GENE-051030-98]
ENSDARG00000077513	ppp1r3da	ppp1r3da	https://zfin.org/ZDB-GENE-080204-75	protein phosphatase 1, regulatory subunit 3Da [Source:ZFIN;Acc:ZDB-GENE-080204-75]
ENSDARG00000077533	eif3f	eif3f	https://zfin.org/ZDB-GENE-100215-2	eukaryotic translation initiation factor 3, subunit F [Source:ZFIN;Acc:ZDB-GENE-100215-2]
ENSDARG00000015343	pgd	pgd	https://zfin.org/ZDB-GENE-040426-2807	phosphogluconate dehydrogenase [Source:ZFIN;Acc:ZDB-GENE-040426-2807]
ENSDARG00000002792	arcn1a	arcn1a	https://zfin.org/ZDB-GENE-021031-2	archain 1a [Source:ZFIN;Acc:ZDB-GENE-021031-2]
ENSDARG00000102219	TRIM35	TRIM35.4	https://zfin.org/ZDB-GENE-131125-5	si:ch211-12p12.2 [Source:ZFIN;Acc:ZDB-GENE-131125-5]
ENSDARG00000091385	zgc:165409	zgc:165409	https://zfin.org/ZDB-GENE-070615-19	zgc:165409 [Source:ZFIN;Acc:ZDB-GENE-070615-19]
ENSDARG00000007347	degs1	degs1	https://zfin.org/ZDB-GENE-030131-5283	delta(4)-desaturase, sphingolipid 1 [Source:ZFIN;Acc:ZDB-GENE-030131-5283]
ENSDARG00000035282	emc6	emc6	https://zfin.org/ZDB-GENE-030131-9164	ER membrane protein complex subunit 6 [Source:ZFIN;Acc:ZDB-GENE-030131-9164]
ENSDARG00000096419	si:ch211-114n24.7	si:ch211-114n24.7	https://zfin.org/ZDB-GENE-050208-65	si:ch211-114n24.7 [Source:ZFIN;Acc:ZDB-GENE-050208-65]
ENSDARG00000099448	sh3d21	sh3d21	https://zfin.org/ZDB-GENE-051120-57	SH3 domain containing 21 [Source:ZFIN;Acc:ZDB-GENE-051120-57]
ENSDARG00000008551	pole3	pole3	https://zfin.org/ZDB-GENE-040426-1773	polymerase (DNA directed), epsilon 3 (p17 subunit) [Source:ZFIN;Acc:ZDB-GENE-040426-1773]
ENSDARG00000078685	rufy1	rufy1	https://zfin.org/ZDB-GENE-090421-4	RUN and FYVE domain containing 1 [Source:ZFIN;Acc:ZDB-GENE-090421-4]
ENSDARG00000053518	adhfe1	adhfe1	https://zfin.org/ZDB-GENE-040426-2070	alcohol dehydrogenase, iron containing, 1 [Source:ZFIN;Acc:ZDB-GENE-040426-2070]
ENSDARG00000098433	utp6	utp6	https://zfin.org/ZDB-GENE-040426-769	UTP6, small subunit (SSU) processome component, homolog (yeast) [Source:ZFIN;Acc:ZDB-GENE-040426-769]
ENSDARG00000102097	nfkbiz	nfkbiz	https://zfin.org/ZDB-GENE-071024-1	nuclear factor of kappa light polypeptide gene enhancer in B-cells inhibitor, zeta [Source:ZFIN;Acc:ZDB-GENE-071024-1]
ENSDARG00000035338	tppp2	tppp2	https://zfin.org/ZDB-GENE-140106-24	tubulin polymerization-promoting protein family member 2 [Source:ZFIN;Acc:ZDB-GENE-140106-24]
ENSDARG00000007129	slc6a16a	slc6a16a	https://zfin.org/ZDB-GENE-061009-43	solute carrier family 6, member 16a [Source:ZFIN;Acc:ZDB-GENE-061009-43]
ENSDARG00000010194	eif4bb	eif4bb	https://zfin.org/ZDB-GENE-030131-8563	eukaryotic translation initiation factor 4Bb [Source:ZFIN;Acc:ZDB-GENE-030131-8563]
ENSDARG00000003328	slf2	slf2	https://zfin.org/ZDB-GENE-081107-61	SMC5-SMC6 complex localization factor 2 [Source:ZFIN;Acc:ZDB-GENE-081107-61]
ENSDARG00000068863	si:dkey-98f17.5	si:dkey-98f17.5	https://zfin.org/ZDB-GENE-060526-354	si:dkey-98f17.5 [Source:ZFIN;Acc:ZDB-GENE-060526-354]
ENSDARG00000098796	znf1122	znf1122	https://zfin.org/ZDB-GENE-141211-60	zinc finger protein 1122 [Source:ZFIN;Acc:ZDB-GENE-141211-60]
ENSDARG00000017591	fat1a	fat1a	https://zfin.org/ZDB-GENE-050425-1	FAT atypical cadherin 1a [Source:ZFIN;Acc:ZDB-GENE-050425-1]
ENSDARG00000098582	znf1040	znf1040	https://zfin.org/ZDB-GENE-141210-11	zinc finger protein 1040 [Source:ZFIN;Acc:ZDB-GENE-141210-11]
ENSDARG00000010784	ppp1r12a	ppp1r12a	https://zfin.org/ZDB-GENE-041011-3	protein phosphatase 1, regulatory subunit 12A [Source:ZFIN;Acc:ZDB-GENE-041011-3]
ENSDARG00000044144	wapla	wapla	https://zfin.org/ZDB-GENE-131010-1	WAPL cohesin release factor a [Source:ZFIN;Acc:ZDB-GENE-131010-1]
ENSDARG00000100547	si:ch211-67o16.6	si:ch211-67o16.6	https://zfin.org/ZDB-GENE-141216-86	si:ch211-67o16.6 [Source:ZFIN;Acc:ZDB-GENE-141216-86]
ENSDARG00000003854	acsl1b	acsl1b	https://zfin.org/ZDB-GENE-040801-88	acyl-CoA synthetase long-chain family member 1b [Source:ZFIN;Acc:ZDB-GENE-040801-88]
ENSDARG00000004806	grwd1	grwd1	https://zfin.org/ZDB-GENE-030131-9844	glutamate-rich WD repeat containing 1 [Source:ZFIN;Acc:ZDB-GENE-030131-9844]
ENSDARG00000014817	ranbp1	ranbp1	https://zfin.org/ZDB-GENE-040426-2548	RAN binding protein 1 [Source:ZFIN;Acc:ZDB-GENE-040426-2548]
ENSDARG00000103636	si:dkey-122c11.4	si:dkey-122c11.4	https://zfin.org/ZDB-GENE-110913-45	si:dkey-122c11.4 [Source:ZFIN;Acc:ZDB-GENE-110913-45]
ENSDARG00000053106	cep44	cep44	https://zfin.org/ZDB-GENE-060929-392	centrosomal protein 44 [Source:ZFIN;Acc:ZDB-GENE-060929-392]
ENSDARG00000032129	gtf2f1	gtf2f1	https://zfin.org/ZDB-GENE-030131-4557	general transcription factor IIF, polypeptide 1 [Source:ZFIN;Acc:ZDB-GENE-030131-4557]
ENSDARG00000020241	icmt	icmt	https://zfin.org/ZDB-GENE-050417-90	isoprenylcysteine carboxyl methyltransferase [Source:ZFIN;Acc:ZDB-GENE-050417-90]
ENSDARG00000077176	zgc:174888	zgc:174888	https://zfin.org/ZDB-GENE-030328-33	zgc:174888 [Source:ZFIN;Acc:ZDB-GENE-030328-33]
ENSDARG00000035422	cyr61l1	cyr61l1	https://zfin.org/ZDB-GENE-050417-136	cysteine-rich, angiogenic inducer 61 like 1 [Source:ZFIN;Acc:ZDB-GENE-050417-136]
ENSDARG00000054540	imp4	imp4	https://zfin.org/ZDB-GENE-040718-474	IMP4, U3 small nucleolar ribonucleoprotein, homolog (yeast) [Source:ZFIN;Acc:ZDB-GENE-040718-474]
ENSDARG00000092708	si:dkey-228c11.4	si:dkey-228c11.4	https://zfin.org/ZDB-GENE-061207-61	si:dkey-228c11.4 [Source:ZFIN;Acc:ZDB-GENE-061207-61]
ENSDARG00000089109	bcl2b	bcl2b	https://zfin.org/ZDB-GENE-110411-185	B-cell CLL/lymphoma 2b [Source:ZFIN;Acc:ZDB-GENE-110411-185]
ENSDARG00000097193	si:dkey-28n18.9	si:dkey-28n18.9	https://zfin.org/ZDB-GENE-131127-205	si:dkey-28n18.9 [Source:ZFIN;Acc:ZDB-GENE-131127-205]
ENSDARG00000037906	alkbh7	alkbh7	https://zfin.org/ZDB-GENE-050417-78	alkB homolog 7 [Source:ZFIN;Acc:ZDB-GENE-050417-78]
ENSDARG00000071021	papss2a	papss2a	https://zfin.org/ZDB-GENE-061110-85	3'-phosphoadenosine 5'-phosphosulfate synthase 2a [Source:ZFIN;Acc:ZDB-GENE-061110-85]
ENSDARG00000054934	zgc:101765	zgc:101765	https://zfin.org/ZDB-GENE-041010-156	zgc:101765 [Source:ZFIN;Acc:ZDB-GENE-041010-156]
ENSDARG00000037929	strada	strada	https://zfin.org/ZDB-GENE-030131-6482	ste20-related kinase adaptor alpha [Source:ZFIN;Acc:ZDB-GENE-030131-6482]
ENSDARG00000011934	gyg1a	gyg1a	https://zfin.org/ZDB-GENE-040426-2910	glycogenin 1a [Source:ZFIN;Acc:ZDB-GENE-040426-2910]
ENSDARG00000054937	badb	badb	https://zfin.org/ZDB-GENE-000616-1	BCL2-associated agonist of cell death b [Source:ZFIN;Acc:ZDB-GENE-000616-1]
ENSDARG00000009607	ccnc	ccnc	https://zfin.org/ZDB-GENE-030131-7369	cyclin C [Source:ZFIN;Acc:ZDB-GENE-030131-7369]
ENSDARG00000077400	rbm10	rbm10	https://zfin.org/ZDB-GENE-100922-245	RNA binding motif protein 10 [Source:ZFIN;Acc:ZDB-GENE-100922-245]
ENSDARG00000026053	hltf	hltf	https://zfin.org/ZDB-GENE-030131-3306	helicase-like transcription factor [Source:ZFIN;Acc:ZDB-GENE-030131-3306]
ENSDARG00000070278	mettl14	mettl14	https://zfin.org/ZDB-GENE-040426-2328	methyltransferase like 14 [Source:ZFIN;Acc:ZDB-GENE-040426-2328]
ENSDARG00000035751	ipo7	ipo7	https://zfin.org/ZDB-GENE-030131-458	importin 7 [Source:ZFIN;Acc:ZDB-GENE-030131-458]
ENSDARG00000103806	si:ch211-12p12.4	si:ch211-12p12.4	https://zfin.org/ZDB-GENE-131120-120	si:ch211-12p12.4 [Source:ZFIN;Acc:ZDB-GENE-131120-120]
ENSDARG00000092166	si:dkey-147f3.8	si:dkey-147f3.8	https://zfin.org/ZDB-GENE-061009-32	si:dkey-147f3.8 [Source:ZFIN;Acc:ZDB-GENE-061009-32]
ENSDARG00000007216	abce1	abce1	https://zfin.org/ZDB-GENE-040426-1995	ATP-binding cassette, sub-family E (OABP), member 1 [Source:ZFIN;Acc:ZDB-GENE-040426-1995]
ENSDARG00000104139	atp1a3b	atp1a3b	https://zfin.org/ZDB-GENE-001212-8	ATPase, Na+/K+ transporting, alpha 3b polypeptide [Source:ZFIN;Acc:ZDB-GENE-001212-8]
ENSDARG00000032175	puf60a	puf60a	https://zfin.org/ZDB-GENE-030131-2891	poly-U binding splicing factor a [Source:ZFIN;Acc:ZDB-GENE-030131-2891]
ENSDARG00000079312	kmt2ca	kmt2ca	https://zfin.org/ZDB-GENE-080520-3	lysine (K)-specific methyltransferase 2Ca [Source:ZFIN;Acc:ZDB-GENE-080520-3]
ENSDARG00000078333	tmem234	tmem234	https://zfin.org/ZDB-GENE-090313-326	transmembrane protein 234 [Source:ZFIN;Acc:ZDB-GENE-090313-326]
ENSDARG00000038133	zgc:113411	zgc:113411	https://zfin.org/ZDB-GENE-050417-474	zgc:113411 [Source:ZFIN;Acc:ZDB-GENE-050417-474]
ENSDARG00000056150	rbms2b	rbms2b	https://zfin.org/ZDB-GENE-040801-51	RNA binding motif, single stranded interacting protein 2b [Source:ZFIN;Acc:ZDB-GENE-040801-51]
ENSDARG00000104214	si:ch211-67o16.3	si:ch211-67o16.3	https://zfin.org/ZDB-GENE-141216-24	si:ch211-67o16.3 [Source:ZFIN;Acc:ZDB-GENE-141216-24]
ENSDARG00000096205	znf997	znf997	https://zfin.org/ZDB-GENE-110914-80	zinc finger protein 997 [Source:ZFIN;Acc:ZDB-GENE-110914-80]
ENSDARG00000012021	kdsr	kdsr	https://zfin.org/ZDB-GENE-040426-853	3-ketodihydrosphingosine reductase [Source:ZFIN;Acc:ZDB-GENE-040426-853]
ENSDARG00000074307	rapgef5b	rapgef5b	https://zfin.org/ZDB-GENE-061215-2	Rap guanine nucleotide exchange factor (GEF) 5b [Source:ZFIN;Acc:ZDB-GENE-061215-2]
ENSDARG00000075819	arhgef2	arhgef2	https://zfin.org/ZDB-GENE-030717-1	rho/rac guanine nucleotide exchange factor (GEF) 2 [Source:ZFIN;Acc:ZDB-GENE-030717-1]
ENSDARG00000053744	dcdc2b	dcdc2b	https://zfin.org/ZDB-GENE-051113-124	doublecortin domain containing 2B [Source:ZFIN;Acc:ZDB-GENE-051113-124]
ENSDARG00000061896	slco2a1	slco2a1	https://zfin.org/ZDB-GENE-060606-3	solute carrier organic anion transporter family, member 2A1 [Source:ZFIN;Acc:ZDB-GENE-060606-3]
ENSDARG00000074756	tfb2m	tfb2m	https://zfin.org/ZDB-GENE-070521-3	transcription factor B2, mitochondrial [Source:ZFIN;Acc:ZDB-GENE-070521-3]
ENSDARG00000008383	arpc1a	arpc1a	https://zfin.org/ZDB-GENE-040116-1	actin related protein 2/3 complex, subunit 1A [Source:ZFIN;Acc:ZDB-GENE-040116-1]
ENSDARG00000015674	msx3	msx3	https://zfin.org/ZDB-GENE-980526-306	muscle segment homeobox 3 [Source:ZFIN;Acc:ZDB-GENE-980526-306]
ENSDARG00000006983	celf3b	celf3b	https://zfin.org/ZDB-GENE-110408-50	cugbp, Elav-like family member 3b [Source:ZFIN;Acc:ZDB-GENE-110408-50]
ENSDARG00000013853	lmo4a	lmo4a	https://zfin.org/ZDB-GENE-010702-1	LIM domain only 4a [Source:ZFIN;Acc:ZDB-GENE-010702-1]
ENSDARG00000075639	si:ch211-89o9.6	si:ch211-89o9.6	https://zfin.org/ZDB-GENE-030131-7155	si:ch211-89o9.6 [Source:ZFIN;Acc:ZDB-GENE-030131-7155]
ENSDARG00000090444	ponzr1	ponzr1	https://zfin.org/ZDB-GENE-070727-1	plac8 onzin related protein 1 [Source:ZFIN;Acc:ZDB-GENE-070727-1]
ENSDARG00000058820	bin1b	bin1b	https://zfin.org/ZDB-GENE-030425-1	bridging integrator 1b [Source:ZFIN;Acc:ZDB-GENE-030425-1]
ENSDARG00000040650	gps1	gps1	https://zfin.org/ZDB-GENE-041111-240	G protein pathway suppressor 1 [Source:ZFIN;Acc:ZDB-GENE-041111-240]
ENSDARG00000095136	si:ch211-130m23.2	si:ch211-130m23.2	https://zfin.org/ZDB-GENE-060531-13	si:ch211-130m23.2 [Source:ZFIN;Acc:ZDB-GENE-060531-13]
ENSDARG00000087641	cdh26.2	cdh26.2	https://zfin.org/ZDB-GENE-100922-183	cadherin 26, tandem duplicate 2 [Source:ZFIN;Acc:ZDB-GENE-100922-183]
ENSDARG00000104918	si:ch211-196f19.1	si:ch211-196f19.1	https://zfin.org/ZDB-GENE-081103-47	si:ch211-196f19.1 [Source:ZFIN;Acc:ZDB-GENE-081103-47]
ENSDARG00000052494	pcdh18b	pcdh18b	https://zfin.org/ZDB-GENE-080804-1	protocadherin 18b [Source:ZFIN;Acc:ZDB-GENE-080804-1]
ENSDARG00000017427	phf20l1	phf20l1	https://zfin.org/ZDB-GENE-030131-5837	PHD finger protein 20-like 1 [Source:ZFIN;Acc:ZDB-GENE-030131-5837]
ENSDARG00000098786	rangrf	rangrf	https://zfin.org/ZDB-GENE-060526-143	RAN guanine nucleotide release factor [Source:ZFIN;Acc:ZDB-GENE-060526-143]
ENSDARG00000002701	rasl12	rasl12	https://zfin.org/ZDB-GENE-040426-1201	RAS-like, family 12 [Source:ZFIN;Acc:ZDB-GENE-040426-1201]
ENSDARG00000057058	minpp1a	minpp1a	https://zfin.org/ZDB-GENE-060929-1194	multiple inositol-polyphosphate phosphatase 1a [Source:ZFIN;Acc:ZDB-GENE-060929-1194]
ENSDARG00000074217	si:dkey-188i13.6	si:dkey-188i13.6	https://zfin.org/ZDB-GENE-030131-7410	si:dkey-188i13.6 [Source:ZFIN;Acc:ZDB-GENE-030131-7410]
ENSDARG00000074060	map3k14a	map3k14a	https://zfin.org/ZDB-GENE-120215-80	mitogen-activated protein kinase kinase kinase 14a [Source:ZFIN;Acc:ZDB-GENE-120215-80]
ENSDARG00000075121	hbegfa	hbegfa	https://zfin.org/ZDB-GENE-080204-119	heparin-binding EGF-like growth factor a [Source:ZFIN;Acc:ZDB-GENE-080204-119]
ENSDARG00000044808	slc4a4b	slc4a4b	https://zfin.org/ZDB-GENE-091030-1	solute carrier family 4 (sodium bicarbonate cotransporter), member 4b [Source:ZFIN;Acc:ZDB-GENE-091030-1]
ENSDARG00000000760	znf511	znf511	https://zfin.org/ZDB-GENE-030616-621	zinc finger protein 511 [Source:ZFIN;Acc:ZDB-GENE-030616-621]
ENSDARG00000071871	glod5	glod5	https://zfin.org/ZDB-GENE-050522-174	glyoxalase domain containing 5 [Source:ZFIN;Acc:ZDB-GENE-050522-174]
ENSDARG00000045139	ca7	ca7	https://zfin.org/ZDB-GENE-040426-1786	carbonic anhydrase VII [Source:ZFIN;Acc:ZDB-GENE-040426-1786]
ENSDARG00000099090	znf1087	znf1087	https://zfin.org/ZDB-GENE-110913-106	zinc finger protein 1087 [Source:ZFIN;Acc:ZDB-GENE-110913-106]
ENSDARG00000059886	fam222ba	fam222ba	https://zfin.org/ZDB-GENE-060526-355	family with sequence similarity 222, member Ba [Source:ZFIN;Acc:ZDB-GENE-060526-355]
ENSDARG00000056691	cpeb4	cpeb4	https://zfin.org/ZDB-GENE-040426-1557	cytoplasmic polyadenylation element binding protein 4 [Source:ZFIN;Acc:ZDB-GENE-040426-1557]
ENSDARG00000030563	zgc:77880	zgc:77880	https://zfin.org/ZDB-GENE-040426-1901	zgc:77880 [Source:ZFIN;Acc:ZDB-GENE-040426-1901]
ENSDARG00000068650	fam214b	fam214b	https://zfin.org/ZDB-GENE-060526-330	family with sequence similarity 214, member B [Source:ZFIN;Acc:ZDB-GENE-060526-330]
ENSDARG00000089138	LONRF2	LONRF2	https://zfin.org/ZDB-GENE-030131-8303	si:ch1073-440b2.1 [Source:ZFIN;Acc:ZDB-GENE-030131-8303]
ENSDARG00000076791	cdk13	cdk13	https://zfin.org/ZDB-GENE-030131-4975	cyclin-dependent kinase 13 [Source:ZFIN;Acc:ZDB-GENE-030131-4975]
ENSDARG00000027887	zfyve21	zfyve21	https://zfin.org/ZDB-GENE-030131-1296	zinc finger, FYVE domain containing 21 [Source:ZFIN;Acc:ZDB-GENE-030131-1296]
ENSDARG00000097878	si:ch73-376g11.3	si:ch73-376g11.3	https://zfin.org/ZDB-GENE-131121-375	si:ch73-376g11.3 [Source:ZFIN;Acc:ZDB-GENE-131121-375]
ENSDARG00000002165	psme1	psme1	https://zfin.org/ZDB-GENE-991110-17	proteasome activator subunit 1 [Source:ZFIN;Acc:ZDB-GENE-991110-17]
ENSDARG00000068868	nap1l4b	nap1l4b	https://zfin.org/ZDB-GENE-041114-168	nucleosome assembly protein 1-like 4b [Source:ZFIN;Acc:ZDB-GENE-041114-168]
ENSDARG00000053586	creb1a	creb1a	https://zfin.org/ZDB-GENE-050417-355	cAMP responsive element binding protein 1a [Source:ZFIN;Acc:ZDB-GENE-040426-750]
ENSDARG00000035056	fgf13a	fgf13a	https://zfin.org/ZDB-GENE-041114-101	fibroblast growth factor 13a [Source:ZFIN;Acc:ZDB-GENE-041114-101]
ENSDARG00000015905	lztr1	lztr1	https://zfin.org/ZDB-GENE-030131-9564	leucine-zipper-like transcription regulator 1 [Source:ZFIN;Acc:ZDB-GENE-030131-9564]
ENSDARG00000101899	KNCN	KNCN	https://zfin.org/ZDB-GENE-070705-385	si:dkey-225f23.3 [Source:ZFIN;Acc:ZDB-GENE-070705-385]
ENSDARG00000025859	lmf2b	lmf2b	https://zfin.org/ZDB-GENE-070206-11	lipase maturation factor 2b [Source:ZFIN;Acc:ZDB-GENE-070206-11]
ENSDARG00000007320	rpl7	rpl7	https://zfin.org/ZDB-GENE-030131-8654	ribosomal protein L7 [Source:ZFIN;Acc:ZDB-GENE-030131-8654]
ENSDARG00000092191	si:dkey-238c7.13	si:dkey-238c7.13	https://zfin.org/ZDB-GENE-030131-7311	si:dkey-238c7.13 [Source:ZFIN;Acc:ZDB-GENE-030131-7311]
ENSDARG00000100476	si:dkeyp-110c7.4	si:dkeyp-110c7.4	https://zfin.org/ZDB-GENE-070705-532	si:dkeyp-110c7.4 [Source:ZFIN;Acc:ZDB-GENE-070705-532]
ENSDARG00000103307	znf1117	znf1117	https://zfin.org/ZDB-GENE-110914-52	zinc finger protein 1117 [Source:ZFIN;Acc:ZDB-GENE-110914-52]
ENSDARG00000102884	si:ch211-145h19.5	si:ch211-145h19.5	https://zfin.org/ZDB-GENE-110914-112	si:ch211-145h19.5 [Source:ZFIN;Acc:ZDB-GENE-110914-112]
ENSDARG00000100519	spop	spop	https://zfin.org/ZDB-GENE-040426-1378	speckle-type POZ protein [Source:ZFIN;Acc:ZDB-GENE-040426-1378]
ENSDARG00000093936	si:dkeyp-1h4.6	si:dkeyp-1h4.6	https://zfin.org/ZDB-GENE-060503-841	si:dkeyp-1h4.6 [Source:ZFIN;Acc:ZDB-GENE-060503-841]
ENSDARG00000061830	prss12	prss12	https://zfin.org/ZDB-GENE-090313-45	protease, serine, 12 (neurotrypsin, motopsin) [Source:ZFIN;Acc:ZDB-GENE-090313-45]
ENSDARG00000102810	samd1a	samd1a	https://zfin.org/ZDB-GENE-061013-517	sterile alpha motif domain containing 1a [Source:ZFIN;Acc:ZDB-GENE-061013-517]
ENSDARG00000104353	nop58	nop58	https://zfin.org/ZDB-GENE-040426-2140	NOP58 ribonucleoprotein homolog (yeast) [Source:ZFIN;Acc:ZDB-GENE-040426-2140]
ENSDARG00000076594	pcdh12	pcdh12	https://zfin.org/ZDB-GENE-140106-126	protocadherin 12 [Source:ZFIN;Acc:ZDB-GENE-140106-126]
ENSDARG00000102783	slc25a35	slc25a35	https://zfin.org/ZDB-GENE-060526-142	solute carrier family 25, member 35 [Source:ZFIN;Acc:ZDB-GENE-060526-142]
ENSDARG00000077121	cyp26b1	cyp26b1	https://zfin.org/ZDB-GENE-030131-2908	cytochrome P450, family 26, subfamily b, polypeptide 1 [Source:ZFIN;Acc:ZDB-GENE-030131-2908]
ENSDARG00000102824	pcdh10b	pcdh10b	https://zfin.org/ZDB-GENE-030721-4	protocadherin 10b [Source:ZFIN;Acc:ZDB-GENE-030721-4]
ENSDARG00000034522	rab6ba	rab6ba	https://zfin.org/ZDB-GENE-050809-136	RAB6B, member RAS oncogene family a [Source:ZFIN;Acc:ZDB-GENE-050809-136]
ENSDARG00000070076	actr2b	actr2b	https://zfin.org/ZDB-GENE-050410-4	ARP2 actin-related protein 2b homolog (yeast) [Source:ZFIN;Acc:ZDB-GENE-050410-4]
ENSDARG00000100317	ahsa1b	ahsa1b	https://zfin.org/ZDB-GENE-030131-664	AHA1, activator of heat shock protein ATPase homolog 1b [Source:ZFIN;Acc:ZDB-GENE-030131-664]
ENSDARG00000092950	si:dkey-7a20.9	si:dkey-7a20.9	https://zfin.org/ZDB-GENE-090313-340	si:dkey-7a20.9 [Source:ZFIN;Acc:ZDB-GENE-090313-340]
ENSDARG00000057053	SGMS1	SGMS1	https://zfin.org/ZDB-GENE-041114-201	zgc:91976 [Source:ZFIN;Acc:ZDB-GENE-041114-201]
ENSDARG00000101327	znf1076	znf1076	https://zfin.org/ZDB-GENE-110913-64	zinc finger protein 1076 [Source:ZFIN;Acc:ZDB-GENE-110913-64]
ENSDARG00000101963	tmem141	tmem141	https://zfin.org/ZDB-GENE-060929-272	transmembrane protein 141 [Source:ZFIN;Acc:ZDB-GENE-060929-272]
ENSDARG00000058042	kitlgb	kitlgb	https://zfin.org/ZDB-GENE-070424-2	kit ligand b [Source:ZFIN;Acc:ZDB-GENE-070424-2]
ENSDARG00000038835	ppid	ppid	https://zfin.org/ZDB-GENE-040625-34	peptidylprolyl isomerase D [Source:ZFIN;Acc:ZDB-GENE-040625-34]
ENSDARG00000044267	sumo1	sumo1	https://zfin.org/ZDB-GENE-040426-2186	small ubiquitin-like modifier 1 [Source:ZFIN;Acc:ZDB-GENE-040426-2186]
ENSDARG00000099960	elovl1a	elovl1a	https://zfin.org/ZDB-GENE-041010-66	ELOVL fatty acid elongase 1a [Source:ZFIN;Acc:ZDB-GENE-041010-66]
ENSDARG00000027063	arpc1b	arpc1b	https://zfin.org/ZDB-GENE-030131-7414	actin related protein 2/3 complex, subunit 1B [Source:ZFIN;Acc:ZDB-GENE-030131-7414]
ENSDARG00000094249	LCOR	LCOR	https://zfin.org/ZDB-GENE-030131-2746	wu:fc17b08 [Source:ZFIN;Acc:ZDB-GENE-030131-2746]
ENSDARG00000092228	si:dkey-27p18.3	si:dkey-27p18.3	https://zfin.org/ZDB-GENE-060526-287	si:dkey-27p18.3 [Source:ZFIN;Acc:ZDB-GENE-060526-287]
ENSDARG00000025605	nvl	nvl	https://zfin.org/ZDB-GENE-040426-2871	nuclear VCP-like [Source:ZFIN;Acc:ZDB-GENE-040426-2871]
ENSDARG00000098013	si:ch211-130m23.5	si:ch211-130m23.5	https://zfin.org/ZDB-GENE-131121-298	si:ch211-130m23.5 [Source:ZFIN;Acc:ZDB-GENE-131121-298]
ENSDARG00000012016	hpgd	hpgd	https://zfin.org/ZDB-GENE-080728-2	hydroxyprostaglandin dehydrogenase 15-(NAD) [Source:ZFIN;Acc:ZDB-GENE-080728-2]
ENSDARG00000070795	eaf1	eaf1	https://zfin.org/ZDB-GENE-040625-109	ELL associated factor 1 [Source:ZFIN;Acc:ZDB-GENE-040625-109]
ENSDARG00000096338	si:dkey-20j1.4	si:dkey-20j1.4	https://zfin.org/ZDB-GENE-120214-35	si:dkey-20j1.4 [Source:ZFIN;Acc:ZDB-GENE-120214-35]
ENSDARG00000036549	agpat3	agpat3	https://zfin.org/ZDB-GENE-040426-2765	1-acylglycerol-3-phosphate O-acyltransferase 3 [Source:ZFIN;Acc:ZDB-GENE-040426-2765]
ENSDARG00000078016	dtx4	dtx4	https://zfin.org/ZDB-GENE-070410-129	deltex 4, E3 ubiquitin ligase [Source:ZFIN;Acc:ZDB-GENE-070410-129]
ENSDARG00000097959	si:dkey-248g15.3	si:dkey-248g15.3	https://zfin.org/ZDB-GENE-131127-95	si:dkey-248g15.3 [Source:ZFIN;Acc:ZDB-GENE-131127-95]
ENSDARG00000008858	cyp7b1	cyp7b1	https://zfin.org/ZDB-GENE-070912-293	cytochrome P450, family 7, subfamily B, polypeptide 1 [Source:ZFIN;Acc:ZDB-GENE-070912-293]
ENSDARG00000060915	fbxl16	fbxl16	https://zfin.org/ZDB-GENE-120215-180	F-box and leucine-rich repeat protein 16 [Source:ZFIN;Acc:ZDB-GENE-120215-180]
ENSDARG00000070798	pmvk	pmvk	https://zfin.org/ZDB-GENE-070410-91	phosphomevalonate kinase [Source:ZFIN;Acc:ZDB-GENE-070410-91]
ENSDARG00000105177	ilf3b	ilf3b	https://zfin.org/ZDB-GENE-030131-587	interleukin enhancer binding factor 3b [Source:ZFIN;Acc:ZDB-GENE-030131-587]
ENSDARG00000061684	slc25a17	slc25a17	https://zfin.org/ZDB-GENE-070620-4	solute carrier family 25 (mitochondrial carrier; peroxisomal membrane protein), member 17 [Source:ZFIN;Acc:ZDB-GENE-070620-4]
ENSDARG00000090152	anapc10	anapc10	https://zfin.org/ZDB-GENE-060224-2	anaphase promoting complex subunit 10 [Source:ZFIN;Acc:ZDB-GENE-060224-2]
ENSDARG00000088753	si:ch211-57h10.1	si:ch211-57h10.1	https://zfin.org/ZDB-GENE-060526-173	si:ch211-57h10.1 [Source:ZFIN;Acc:ZDB-GENE-060526-173]
ENSDARG00000078574	SENP1	SENP1	https://zfin.org/ZDB-GENE-030131-6462	si:dkey-21c19.3 [Source:ZFIN;Acc:ZDB-GENE-030131-6462]
ENSDARG00000033466	tagln2	tagln2	https://zfin.org/ZDB-GENE-020802-2	transgelin 2 [Source:ZFIN;Acc:ZDB-GENE-020802-2]
ENSDARG00000077323	thap4	thap4	https://zfin.org/ZDB-GENE-070912-5	THAP domain containing 4 [Source:ZFIN;Acc:ZDB-GENE-070912-5]
ENSDARG00000094160	DLEU7	DLEU7	https://zfin.org/ZDB-GENE-100922-213	si:ch73-160h15.3 [Source:ZFIN;Acc:ZDB-GENE-100922-213]
ENSDARG00000078404	cdh26.1	cdh26.1	https://zfin.org/ZDB-GENE-100922-193	cadherin 26, tandem duplicate 1 [Source:ZFIN;Acc:ZDB-GENE-100922-193]
ENSDARG00000045487	rps16	rps16	https://zfin.org/ZDB-GENE-050506-107	ribosomal protein S16 [Source:ZFIN;Acc:ZDB-GENE-050506-107]
ENSDARG00000087070	znf977	znf977	https://zfin.org/ZDB-GENE-110913-138	zinc finger protein 977 [Source:ZFIN;Acc:ZDB-GENE-110913-138]
ENSDARG00000101790	si:ch73-299h12.3	si:ch73-299h12.3	https://zfin.org/ZDB-GENE-081031-93	si:ch73-299h12.3 [Source:ZFIN;Acc:ZDB-GENE-081031-93]
ENSDARG00000060316	cish	cish	https://zfin.org/ZDB-GENE-050907-1	cytokine inducible SH2-containing protein [Source:ZFIN;Acc:ZDB-GENE-050907-1]
ENSDARG00000002190	chmp2bb	chmp2bb	https://zfin.org/ZDB-GENE-040426-2539	charged multivesicular body protein 2Bb [Source:ZFIN;Acc:ZDB-GENE-040426-2539]
ENSDARG00000099312	hn1b	hn1b	https://zfin.org/ZDB-GENE-030131-2784	hematological and neurological expressed 1b [Source:ZFIN;Acc:ZDB-GENE-030131-2784]
ENSDARG00000045463	ralaa	ralaa	https://zfin.org/ZDB-GENE-040426-1344	v-ral simian leukemia viral oncogene homolog Aa (ras related) [Source:ZFIN;Acc:ZDB-GENE-040426-1344]
ENSDARG00000041723	zgc:55461	zgc:55461	https://zfin.org/ZDB-GENE-060929-568	zgc:55461 [Source:ZFIN;Acc:ZDB-GENE-040426-2879]
ENSDARG00000069386	mtg1	mtg1	https://zfin.org/ZDB-GENE-031110-2	mitochondrial ribosome-associated GTPase 1 [Source:ZFIN;Acc:ZDB-GENE-031110-2]
ENSDARG00000093819	si:ch211-207l22.1	si:ch211-207l22.1	https://zfin.org/ZDB-GENE-100922-77	si:ch211-207l22.1 [Source:ZFIN;Acc:ZDB-GENE-100922-77]
ENSDARG00000038612	pih1d3	pih1d3	https://zfin.org/ZDB-GENE-040722-2	PIH1 domain containing 3 [Source:ZFIN;Acc:ZDB-GENE-040722-2]
ENSDARG00000076509	polr2d	polr2d	https://zfin.org/ZDB-GENE-040714-2	polymerase (RNA) II (DNA directed) polypeptide D [Source:ZFIN;Acc:ZDB-GENE-040714-2]
ENSDARG00000038834	etfdh	etfdh	https://zfin.org/ZDB-GENE-040912-168	electron-transferring-flavoprotein dehydrogenase [Source:ZFIN;Acc:ZDB-GENE-040912-168]
ENSDARG00000075034	raver2	raver2	https://zfin.org/ZDB-GENE-090713-1	ribonucleoprotein, PTB-binding 2 [Source:ZFIN;Acc:ZDB-GENE-090713-1]
ENSDARG00000004171	rabac1	rabac1	https://zfin.org/ZDB-GENE-040625-146	Rab acceptor 1 (prenylated) [Source:ZFIN;Acc:ZDB-GENE-040625-146]
ENSDARG00000037871	wipi2	wipi2	https://zfin.org/ZDB-GENE-040718-488	WD repeat domain, phosphoinositide interacting 2 [Source:ZFIN;Acc:ZDB-GENE-040718-488]
ENSDARG00000058992	cers2b	cers2b	https://zfin.org/ZDB-GENE-110408-40	ceramide synthase 2b [Source:ZFIN;Acc:ZDB-GENE-110408-40]
ENSDARG00000104605	si:ch73-299h12.4	si:ch73-299h12.4	https://zfin.org/ZDB-GENE-081104-275	si:ch73-299h12.4 [Source:ZFIN;Acc:ZDB-GENE-081104-275]
ENSDARG00000094101	si:dkey-122c11.8	si:dkey-122c11.8	https://zfin.org/ZDB-GENE-110913-23	si:dkey-122c11.8 [Source:ZFIN;Acc:ZDB-GENE-110913-23]
ENSDARG00000069175	vps4b	vps4b	https://zfin.org/ZDB-GENE-040426-1235	vacuolar protein sorting 4b homolog B (S. cerevisiae) [Source:ZFIN;Acc:ZDB-GENE-040426-1235]
ENSDARG00000062788	irg1l	irg1l	https://zfin.org/ZDB-GENE-061103-301	immunoresponsive gene 1, like [Source:ZFIN;Acc:ZDB-GENE-061103-301]
ENSDARG00000075173	si:ch1073-322p19.1	si:ch1073-322p19.1	https://zfin.org/ZDB-GENE-091204-224	si:ch1073-322p19.1 [Source:ZFIN;Acc:ZDB-GENE-091204-224]
ENSDARG00000031020	pip4k2ca	pip4k2ca	https://zfin.org/ZDB-GENE-030828-9	phosphatidylinositol-5-phosphate 4-kinase, type II, gamma a [Source:ZFIN;Acc:ZDB-GENE-030828-9]
ENSDARG00000079766	tap1	tap1	https://zfin.org/ZDB-GENE-050517-43	transporter 1, ATP-binding cassette, sub-family B (MDR/TAP) [Source:ZFIN;Acc:ZDB-GENE-050517-43]
ENSDARG00000023858	ccdc174	ccdc174	https://zfin.org/ZDB-GENE-050320-54	coiled-coil domain containing 174 [Source:ZFIN;Acc:ZDB-GENE-050320-54]
ENSDARG00000073869	pdzrn3b	pdzrn3b	https://zfin.org/ZDB-GENE-071022-4	PDZ domain containing RING finger 3b [Source:ZFIN;Acc:ZDB-GENE-071022-4]
ENSDARG00000008840	hmbsa	hmbsa	https://zfin.org/ZDB-GENE-040426-1375	hydroxymethylbilane synthase a [Source:ZFIN;Acc:ZDB-GENE-040426-1375]
ENSDARG00000003382	cwc25	cwc25	https://zfin.org/ZDB-GENE-040426-2817	CWC25 spliceosome-associated protein homolog (S. cerevisiae) [Source:ZFIN;Acc:ZDB-GENE-040426-2817]
ENSDARG00000054533	araf	araf	https://zfin.org/ZDB-GENE-050102-2	A-Raf proto-oncogene, serine/threonine kinase [Source:ZFIN;Acc:ZDB-GENE-050102-2]
ENSDARG00000087555	si:ch73-308l14.2	si:ch73-308l14.2	https://zfin.org/ZDB-GENE-141219-12	si:ch73-308l14.2 [Source:ZFIN;Acc:ZDB-GENE-141219-12]
ENSDARG00000099499	ndufa4l	ndufa4l	https://zfin.org/ZDB-GENE-040426-2756	NADH dehydrogenase (ubiquinone) 1 alpha subcomplex 4, like [Source:ZFIN;Acc:ZDB-GENE-040426-2756]
ENSDARG00000095837	si:dkey-185p13.1	si:dkey-185p13.1	https://zfin.org/ZDB-GENE-110411-125	si:dkey-185p13.1 [Source:ZFIN;Acc:ZDB-GENE-110411-125]
ENSDARG00000086283	cnsta	cnsta	https://zfin.org/ZDB-GENE-120917-3	consortin, connexin sorting protein a [Source:ZFIN;Acc:ZDB-GENE-120917-3]
ENSDARG00000094142	si:dkey-261m5.1	si:dkey-261m5.1	https://zfin.org/ZDB-GENE-131125-109	si:dkey-261m5.1 [Source:ZFIN;Acc:ZDB-GENE-131125-109]
ENSDARG00000051854	cdt1	cdt1	https://zfin.org/ZDB-GENE-070111-1	chromatin licensing and DNA replication factor 1 [Source:ZFIN;Acc:ZDB-GENE-070111-1]
ENSDARG00000055644	prss60.2	prss60.2	https://zfin.org/ZDB-GENE-050320-109	protease, serine, 60.2 [Source:ZFIN;Acc:ZDB-GENE-050320-109]
ENSDARG00000056680	stc2a	stc2a	https://zfin.org/ZDB-GENE-041008-14	stanniocalcin 2a [Source:ZFIN;Acc:ZDB-GENE-041008-14]
ENSDARG00000003519	aprt	aprt	https://zfin.org/ZDB-GENE-040426-1492	adenine phosphoribosyltransferase [Source:ZFIN;Acc:ZDB-GENE-040426-1492]
ENSDARG00000058243	phactr3a	phactr3a	https://zfin.org/ZDB-GENE-080220-4	phosphatase and actin regulator 3a [Source:ZFIN;Acc:ZDB-GENE-080220-4]
ENSDARG00000074366	si:ch1073-186i23.1	si:ch1073-186i23.1	https://zfin.org/ZDB-GENE-080917-28	si:ch1073-186i23.1 [Source:ZFIN;Acc:ZDB-GENE-080917-28]
ENSDARG00000026387	tmem55bb	tmem55bb	https://zfin.org/ZDB-GENE-121214-195	transmembrane protein 55Bb [Source:ZFIN;Acc:ZDB-GENE-121214-195]
ENSDARG00000059887	eral1	eral1	https://zfin.org/ZDB-GENE-060526-84	Era-like 12S mitochondrial rRNA chaperone 1 [Source:ZFIN;Acc:ZDB-GENE-060526-84]
ENSDARG00000075899	adgrl2b.1	adgrl2b.1	https://zfin.org/ZDB-GENE-130116-4	adhesion G protein-coupled receptor L2b, tandem duplicate 1 [Source:ZFIN;Acc:ZDB-GENE-130116-4]
ENSDARG00000020239	lpin1	lpin1	https://zfin.org/ZDB-GENE-080722-2	lipin 1 [Source:ZFIN;Acc:ZDB-GENE-080722-2]
ENSDARG00000051853	galns	galns	https://zfin.org/ZDB-GENE-070112-1152	galactosamine (N-acetyl)-6-sulfatase [Source:ZFIN;Acc:ZDB-GENE-070112-1152]
ENSDARG00000038213	slc35b1	slc35b1	https://zfin.org/ZDB-GENE-040912-148	solute carrier family 35, member B1 [Source:ZFIN;Acc:ZDB-GENE-040912-148]
ENSDARG00000035563	znf703	znf703	https://zfin.org/ZDB-GENE-010717-1	zinc finger protein 703 [Source:ZFIN;Acc:ZDB-GENE-010717-1]
ENSDARG00000062390	cdc42ep5	cdc42ep5	https://zfin.org/ZDB-GENE-030131-5813	CDC42 effector protein (Rho GTPase binding) 5 [Source:ZFIN;Acc:ZDB-GENE-030131-5813]
ENSDARG00000087788	RNH1	RNH1	https://zfin.org/ZDB-GENE-070424-160	si:ch211-22k7.9 [Source:ZFIN;Acc:ZDB-GENE-070424-160]
ENSDARG00000037628	trpt1	trpt1	https://zfin.org/ZDB-GENE-050227-16	tRNA phosphotransferase 1 [Source:ZFIN;Acc:ZDB-GENE-050227-16]
ENSDARG00000099766	myl12.1	myl12.1	https://zfin.org/ZDB-GENE-030131-4918	myosin, light chain 12, genome duplicate 1 [Source:ZFIN;Acc:ZDB-GENE-030131-4918]
ENSDARG00000098444	si:dkey-3h2.4	si:dkey-3h2.4	https://zfin.org/ZDB-GENE-070705-466	si:dkey-3h2.4 [Source:ZFIN;Acc:ZDB-GENE-070705-466]
ENSDARG00000051851	ctu2	ctu2	https://zfin.org/ZDB-GENE-040801-79	cytosolic thiouridylase subunit 2 homolog (S. pombe) [Source:ZFIN;Acc:ZDB-GENE-040801-79]
ENSDARG00000099640	eed	eed	https://zfin.org/ZDB-GENE-050417-287	embryonic ectoderm development [Source:ZFIN;Acc:ZDB-GENE-050417-287]
ENSDARG00000070109	ncapg	ncapg	https://zfin.org/ZDB-GENE-041111-282	non-SMC condensin I complex, subunit G [Source:ZFIN;Acc:ZDB-GENE-041111-282]
ENSDARG00000101388	si:ch211-171l17.14	si:ch211-171l17.14	https://zfin.org/ZDB-GENE-070912-153	si:ch211-171l17.14 [Source:ZFIN;Acc:ZDB-GENE-070912-153]
ENSDARG00000023303	zgc:66427	zgc:66427	https://zfin.org/ZDB-GENE-040426-1913	zgc:66427 [Source:ZFIN;Acc:ZDB-GENE-040426-1913]
ENSDARG00000063095	ctsf	ctsf	https://zfin.org/ZDB-GENE-030131-9831	cathepsin F [Source:ZFIN;Acc:ZDB-GENE-030131-9831]
ENSDARG00000104919	si:ch211-153b23.3	si:ch211-153b23.3	https://zfin.org/ZDB-GENE-141216-408	si:ch211-153b23.3 [Source:ZFIN;Acc:ZDB-GENE-141216-408]
ENSDARG00000101319	si:ch73-299h12.6	si:ch73-299h12.6	https://zfin.org/ZDB-GENE-081031-44	si:ch73-299h12.6 [Source:ZFIN;Acc:ZDB-GENE-081031-44]
ENSDARG00000040295	apoeb	apoeb	https://zfin.org/ZDB-GENE-980526-368	apolipoprotein Eb [Source:ZFIN;Acc:ZDB-GENE-980526-368]
ENSDARG00000044809	fpgs	fpgs	https://zfin.org/ZDB-GENE-040426-2781	folylpolyglutamate synthase [Source:ZFIN;Acc:ZDB-GENE-040426-2781]
ENSDARG00000039243	zgc:152791	zgc:152791	https://zfin.org/ZDB-GENE-060901-4	zgc:152791 [Source:ZFIN;Acc:ZDB-GENE-060901-4]
ENSDARG00000070098	lcorl	lcorl	https://zfin.org/ZDB-GENE-030131-6300	ligand dependent nuclear receptor corepressor-like [Source:ZFIN;Acc:ZDB-GENE-030131-6300]
ENSDARG00000099910	si:ch211-208f21.3	si:ch211-208f21.3	https://zfin.org/ZDB-GENE-110913-7	si:ch211-208f21.3 [Source:ZFIN;Acc:ZDB-GENE-110913-7]
ENSDARG00000069013	prdx4	prdx4	https://zfin.org/ZDB-GENE-030131-1096	peroxiredoxin 4 [Source:ZFIN;Acc:ZDB-GENE-030131-1096]
ENSDARG00000100349	prkacaa	prkacaa	https://zfin.org/ZDB-GENE-050114-6	protein kinase, cAMP-dependent, catalytic, alpha, genome duplicate a [Source:ZFIN;Acc:ZDB-GENE-050114-6]
ENSDARG00000097082	im:7152348	im:7152348	https://zfin.org/ZDB-GENE-041111-308	im:7152348 [Source:ZFIN;Acc:ZDB-GENE-041111-308]
ENSDARG00000022007	SPEF1	SPEF1	https://zfin.org/ZDB-GENE-040426-1639	zgc:66426 [Source:ZFIN;Acc:ZDB-GENE-040426-1639]
ENSDARG00000052833	zfand3	zfand3	https://zfin.org/ZDB-GENE-050706-134	zinc finger, AN1-type domain 3 [Source:ZFIN;Acc:ZDB-GENE-050706-134]
ENSDARG00000093496	BEND2	BEND2	https://zfin.org/ZDB-GENE-030131-9565	si:zfos-905g2.1 [Source:ZFIN;Acc:ZDB-GENE-030131-9565]
ENSDARG00000068143	slc39a6	slc39a6	https://zfin.org/ZDB-GENE-030131-3023	solute carrier family 39 (zinc transporter), member 6 [Source:ZFIN;Acc:ZDB-GENE-030131-3023]
ENSDARG00000058893	nhej1	nhej1	https://zfin.org/ZDB-GENE-040426-2515	nonhomologous end-joining factor 1 [Source:ZFIN;Acc:ZDB-GENE-040426-2515]
ENSDARG00000058978	BEND2	BEND2.1	https://zfin.org/ZDB-GENE-050913-14	zgc:113423 [Source:ZFIN;Acc:ZDB-GENE-050913-14]
ENSDARG00000016311	dock9b	dock9b	https://zfin.org/ZDB-GENE-090916-2	dedicator of cytokinesis 9b [Source:ZFIN;Acc:ZDB-GENE-090916-2]
ENSDARG00000013613	anxa13l	anxa13l	https://zfin.org/ZDB-GENE-050522-310	annexin A13, like [Source:ZFIN;Acc:ZDB-GENE-050522-310]
ENSDARG00000075867	mkl1a	mkl1a	https://zfin.org/ZDB-GENE-121205-3	megakaryoblastic leukemia (translocation) 1a [Source:ZFIN;Acc:ZDB-GENE-121205-3]
ENSDARG00000092726	si:dkey-184p9.7	si:dkey-184p9.7	https://zfin.org/ZDB-GENE-091204-97	si:dkey-184p9.7 [Source:ZFIN;Acc:ZDB-GENE-091204-97]
ENSDARG00000102741	sumo2b	sumo2b	https://zfin.org/ZDB-GENE-040801-7	small ubiquitin-like modifier 2b [Source:ZFIN;Acc:ZDB-GENE-040801-7]
ENSDARG00000091548	stard9	stard9	https://zfin.org/ZDB-GENE-111111-11	StAR-related lipid transfer (START) domain containing 9 [Source:ZFIN;Acc:ZDB-GENE-111111-11]
ENSDARG00000100773	zmynd19	zmynd19	https://zfin.org/ZDB-GENE-030131-4460	zinc finger, MYND-type containing 19 [Source:ZFIN;Acc:ZDB-GENE-030131-4460]
ENSDARG00000041776	ndst3	ndst3	https://zfin.org/ZDB-GENE-090312-199	N-deacetylase/N-sulfotransferase (heparan glucosaminyl) 3 [Source:ZFIN;Acc:ZDB-GENE-090312-199]
ENSDARG00000077012	eif4ea	eif4ea	https://zfin.org/ZDB-GENE-040413-1	eukaryotic translation initiation factor 4ea [Source:ZFIN;Acc:ZDB-GENE-040413-1]
ENSDARG00000006603	csrp1a	csrp1a	https://zfin.org/ZDB-GENE-030909-4	cysteine and glycine-rich protein 1a [Source:ZFIN;Acc:ZDB-GENE-030909-4]
ENSDARG00000037020	kif1b	kif1b	https://zfin.org/ZDB-GENE-030820-1	kinesin family member 1B [Source:ZFIN;Acc:ZDB-GENE-030820-1]
ENSDARG00000075194	si:dkey-56e3.3	si:dkey-56e3.3	https://zfin.org/ZDB-GENE-050411-91	si:dkey-56e3.3 [Source:ZFIN;Acc:ZDB-GENE-050411-91]
ENSDARG00000076466	maml1	maml1	https://zfin.org/ZDB-GENE-100820-2	mastermind-like transcriptional coactivator 1 [Source:ZFIN;Acc:ZDB-GENE-100820-2]
ENSDARG00000102950	si:ch211-241b2.1	si:ch211-241b2.1	https://zfin.org/ZDB-GENE-070705-131	si:ch211-241b2.1 [Source:ZFIN;Acc:ZDB-GENE-070705-131]
ENSDARG00000078389	si:dkey-188i13.7	si:dkey-188i13.7	https://zfin.org/ZDB-GENE-090312-190	si:dkey-188i13.7 [Source:ZFIN;Acc:ZDB-GENE-090312-190]
ENSDARG00000104693	il6st	il6st	https://zfin.org/ZDB-GENE-080104-6	interleukin 6 signal transducer [Source:ZFIN;Acc:ZDB-GENE-080104-6]
ENSDARG00000071029	si:dkey-147f3.4	si:dkey-147f3.4	https://zfin.org/ZDB-GENE-061009-29	si:dkey-147f3.4 [Source:ZFIN;Acc:ZDB-GENE-061009-29]
ENSDARG00000009524	rnf150b	rnf150b	https://zfin.org/ZDB-GENE-050417-470	ring finger protein 150b [Source:ZFIN;Acc:ZDB-GENE-050417-470]
ENSDARG00000098679	nup85	nup85	https://zfin.org/ZDB-GENE-040801-145	nucleoporin 85 [Source:ZFIN;Acc:ZDB-GENE-040801-145]
ENSDARG00000039436	il13ra2	il13ra2	https://zfin.org/ZDB-GENE-030521-10	interleukin 13 receptor, alpha 2 [Source:ZFIN;Acc:ZDB-GENE-030521-10]
ENSDARG00000002758	dedd1	dedd1	https://zfin.org/ZDB-GENE-000616-2	death effector domain-containing 1 [Source:ZFIN;Acc:ZDB-GENE-000616-2]
ENSDARG00000091656	lsm8	lsm8	https://zfin.org/ZDB-GENE-070629-3	LSM8 homolog, U6 small nuclear RNA associated [Source:ZFIN;Acc:ZDB-GENE-070629-3]
ENSDARG00000016835	tcirg1a	tcirg1a	https://zfin.org/ZDB-GENE-090311-31	T-cell, immune regulator 1, ATPase, H+ transporting, lysosomal V0 subunit A3a [Source:ZFIN;Acc:ZDB-GENE-090311-31]
ENSDARG00000009350	atg3	atg3	https://zfin.org/ZDB-GENE-030131-8576	autophagy related 3 [Source:ZFIN;Acc:ZDB-GENE-030131-8576]
ENSDARG00000062965	fam45a	fam45a	https://zfin.org/ZDB-GENE-030131-3548	family with sequence similarity 45, member A [Source:ZFIN;Acc:ZDB-GENE-030131-3548]
ENSDARG00000101543	strumpellin	strumpellin	https://zfin.org/ZDB-GENE-040426-838	strumpellin [Source:ZFIN;Acc:ZDB-GENE-040426-838]
ENSDARG00000018478	agxtb	agxtb	https://zfin.org/ZDB-GENE-010302-3	alanine-glyoxylate aminotransferase b [Source:ZFIN;Acc:ZDB-GENE-010302-3]
ENSDARG00000069185	celsr1a	celsr1a	https://zfin.org/ZDB-GENE-030616-78	cadherin EGF LAG seven-pass G-type receptor 1a [Source:ZFIN;Acc:ZDB-GENE-030616-78]
ENSDARG00000014190	sst2	sst2	https://zfin.org/ZDB-GENE-010219-2	somatostatin 2 [Source:ZFIN;Acc:ZDB-GENE-010219-2]
ENSDARG00000101037	asf1ba	asf1ba	https://zfin.org/ZDB-GENE-031118-197	anti-silencing function 1Ba histone chaperone [Source:ZFIN;Acc:ZDB-GENE-031118-197]
ENSDARG00000025797	abhd2a	abhd2a	https://zfin.org/ZDB-GENE-040426-784	abhydrolase domain containing 2a [Source:ZFIN;Acc:ZDB-GENE-040426-784]
ENSDARG00000028148	pax2a	pax2a	https://zfin.org/ZDB-GENE-990415-8	paired box 2a [Source:ZFIN;Acc:ZDB-GENE-990415-8]
ENSDARG00000078894	hemk1	hemk1	https://zfin.org/ZDB-GENE-050208-185	HemK methyltransferase family member 1 [Source:ZFIN;Acc:ZDB-GENE-050208-185]
ENSDARG00000037488	canx	canx	https://zfin.org/ZDB-GENE-040426-2797	calnexin [Source:ZFIN;Acc:ZDB-GENE-040426-2797]
ENSDARG00000063594	hipk1a	hipk1a	https://zfin.org/ZDB-GENE-081031-101	homeodomain interacting protein kinase 1a [Source:ZFIN;Acc:ZDB-GENE-081031-101]
ENSDARG00000077567	angel1	angel1	https://zfin.org/ZDB-GENE-111020-12	angel homolog 1 (Drosophila) [Source:ZFIN;Acc:ZDB-GENE-111020-12]
ENSDARG00000099612	zgc:66483	zgc:66483	https://zfin.org/ZDB-GENE-030131-5765	zgc:66483 [Source:ZFIN;Acc:ZDB-GENE-030131-5765]
ENSDARG00000079350	znf654	znf654	https://zfin.org/ZDB-GENE-030131-1423	zinc finger protein 654 [Source:ZFIN;Acc:ZDB-GENE-030131-1423]
ENSDARG00000069545	atg12	atg12	https://zfin.org/ZDB-GENE-071205-7	ATG12 autophagy related 12 homolog (S. cerevisiae) [Source:ZFIN;Acc:ZDB-GENE-071205-7]
ENSDARG00000070084	phf10	phf10	https://zfin.org/ZDB-GENE-040426-1573	PHD finger protein 10 [Source:ZFIN;Acc:ZDB-GENE-040426-1573]
ENSDARG00000101245	znf1063	znf1063	https://zfin.org/ZDB-GENE-110914-144	zinc finger protein 1063 [Source:ZFIN;Acc:ZDB-GENE-110914-144]
ENSDARG00000099439	serp1	serp1	https://zfin.org/ZDB-GENE-030131-8741	stress-associated endoplasmic reticulum protein 1 [Source:ZFIN;Acc:ZDB-GENE-030131-8741]
ENSDARG00000092361	si:dkey-79f11.7	si:dkey-79f11.7	https://zfin.org/ZDB-GENE-090313-338	si:dkey-79f11.7 [Source:ZFIN;Acc:ZDB-GENE-090313-338]
ENSDARG00000102948	crb3a	crb3a	https://zfin.org/ZDB-GENE-060610-2	crumbs homolog 3a [Source:ZFIN;Acc:ZDB-GENE-060610-2]
ENSDARG00000056080	RAP1GDS1	RAP1GDS1	https://zfin.org/ZDB-GENE-090313-217	si:dkey-191g9.5 [Source:ZFIN;Acc:ZDB-GENE-090313-217]
ENSDARG00000041724	glipr2	glipr2	https://zfin.org/ZDB-GENE-030131-4424	GLI pathogenesis-related 2 [Source:ZFIN;Acc:ZDB-GENE-030131-4424]
ENSDARG00000061603	sorbs2b	sorbs2b	https://zfin.org/ZDB-GENE-070308-3	sorbin and SH3 domain containing 2b [Source:ZFIN;Acc:ZDB-GENE-070308-3]
ENSDARG00000026904	cbln13	cbln13	https://zfin.org/ZDB-GENE-070912-288	cerebellin 13 [Source:ZFIN;Acc:ZDB-GENE-070912-288]
ENSDARG00000078640	fam117aa	fam117aa	https://zfin.org/ZDB-GENE-110606-4	family with sequence similarity 117, member Aa [Source:ZFIN;Acc:ZDB-GENE-110606-4]
ENSDARG00000012369	rdh10b	rdh10b	https://zfin.org/ZDB-GENE-030909-7	retinol dehydrogenase 10b [Source:ZFIN;Acc:ZDB-GENE-030909-7]
ENSDARG00000060252	mogs	mogs	https://zfin.org/ZDB-GENE-070112-412	mannosyl-oligosaccharide glucosidase [Source:ZFIN;Acc:ZDB-GENE-070112-412]
ENSDARG00000063636	galnt11	galnt11	https://zfin.org/ZDB-GENE-060929-998	UDP-N-acetyl-alpha-D-galactosamine:polypeptide N-acetylgalactosaminyltransferase 11 (GalNAc-T11) [Source:ZFIN;Acc:ZDB-GENE-060929-998]
ENSDARG00000004621	gpm6ab	gpm6ab	https://zfin.org/ZDB-GENE-030710-8	glycoprotein M6Ab [Source:ZFIN;Acc:ZDB-GENE-030710-8]
ENSDARG00000058903	GPR161	GPR161	https://zfin.org/ZDB-GENE-120215-39	si:ch211-237c6.4 [Source:ZFIN;Acc:ZDB-GENE-120215-39]
ENSDARG00000058679	KRCC1	KRCC1	https://zfin.org/ZDB-GENE-050913-63	zgc:114104 [Source:ZFIN;Acc:ZDB-GENE-050913-63]
ENSDARG00000026476	tia1l	tia1l	https://zfin.org/ZDB-GENE-030131-2167	cytotoxic granule-associated RNA binding protein 1, like [Source:ZFIN;Acc:ZDB-GENE-030131-2167]
ENSDARG00000088882	GPRIN3	GPRIN3	https://zfin.org/ZDB-GENE-110411-60	si:ch211-149b19.2 [Source:ZFIN;Acc:ZDB-GENE-110411-60]
ENSDARG00000077169	si:ch211-153b23.4	si:ch211-153b23.4	https://zfin.org/ZDB-GENE-030131-7332	si:ch211-153b23.4 [Source:ZFIN;Acc:ZDB-GENE-030131-7332]
ENSDARG00000103795	zgc:113348	zgc:113348	https://zfin.org/ZDB-GENE-050227-10	zgc:113348 [Source:ZFIN;Acc:ZDB-GENE-050227-10]
ENSDARG00000053456	GK	GK	https://zfin.org/ZDB-GENE-080204-72	zgc:172295 [Source:ZFIN;Acc:ZDB-GENE-080204-72]
ENSDARG00000011370	fyna	fyna	https://zfin.org/ZDB-GENE-030903-5	FYN proto-oncogene, Src family tyrosine kinase a [Source:ZFIN;Acc:ZDB-GENE-030903-5]
ENSDARG00000044811	cdk9	cdk9	https://zfin.org/ZDB-GENE-030131-321	cyclin-dependent kinase 9 (CDC2-related kinase) [Source:ZFIN;Acc:ZDB-GENE-030131-321]
ENSDARG00000017219	pabpc1a	pabpc1a	https://zfin.org/ZDB-GENE-030131-3238	poly(A) binding protein, cytoplasmic 1a [Source:ZFIN;Acc:ZDB-GENE-030131-3238]
ENSDARG00000006038	aebp2	aebp2	https://zfin.org/ZDB-GENE-040426-2885	AE binding protein 2 [Source:ZFIN;Acc:ZDB-GENE-040426-2885]
ENSDARG00000033140	desi1a	desi1a	https://zfin.org/ZDB-GENE-040426-1657	desumoylating isopeptidase 1a [Source:ZFIN;Acc:ZDB-GENE-040426-1657]
ENSDARG00000017905	casp3a	casp3a	https://zfin.org/ZDB-GENE-011210-1	caspase 3, apoptosis-related cysteine peptidase a [Source:ZFIN;Acc:ZDB-GENE-011210-1]
ENSDARG00000052011	rrad	rrad	https://zfin.org/ZDB-GENE-030131-5607	Ras-related associated with diabetes [Source:ZFIN;Acc:ZDB-GENE-030131-5607]
ENSDARG00000008191	tmeff1a	tmeff1a	https://zfin.org/ZDB-GENE-070912-294	transmembrane protein with EGF-like and two follistatin-like domains 1a [Source:ZFIN;Acc:ZDB-GENE-070912-294]
ENSDARG00000056862	cep63	cep63	https://zfin.org/ZDB-GENE-040426-1154	centrosomal protein 63 [Source:ZFIN;Acc:ZDB-GENE-040426-1154]
ENSDARG00000101072	cnot6b	cnot6b	https://zfin.org/ZDB-GENE-071004-97	CCR4-NOT transcription complex, subunit 6b [Source:ZFIN;Acc:ZDB-GENE-071004-97]
ENSDARG00000063438	srebf2	srebf2	https://zfin.org/ZDB-GENE-070410-8	sterol regulatory element binding transcription factor 2 [Source:ZFIN;Acc:ZDB-GENE-070410-8]
ENSDARG00000071217	hs6st3a	hs6st3a	https://zfin.org/ZDB-GENE-120215-57	heparan sulfate 6-O-sulfotransferase 3a [Source:ZFIN;Acc:ZDB-GENE-120215-57]
ENSDARG00000104436	zgc:153426	zgc:153426	https://zfin.org/ZDB-GENE-060929-220	zgc:153426 [Source:ZFIN;Acc:ZDB-GENE-060929-220]
ENSDARG00000055797	cnpy4	cnpy4	https://zfin.org/ZDB-GENE-060315-5	canopy4 [Source:ZFIN;Acc:ZDB-GENE-060315-5]
ENSDARG00000075842	pigt	pigt	https://zfin.org/ZDB-GENE-090313-46	phosphatidylinositol glycan anchor biosynthesis, class T [Source:ZFIN;Acc:ZDB-GENE-090313-46]
ENSDARG00000102358	si:dkey-261o4.9	si:dkey-261o4.9	https://zfin.org/ZDB-GENE-141211-1	si:dkey-261o4.9 [Source:ZFIN;Acc:ZDB-GENE-141211-1]
ENSDARG00000011510	rcc2	rcc2	https://zfin.org/ZDB-GENE-040426-2213	regulator of chromosome condensation 2 [Source:ZFIN;Acc:ZDB-GENE-040426-2213]
ENSDARG00000070447	slc39a9	slc39a9	https://zfin.org/ZDB-GENE-060314-3	solute carrier family 39, member 9 [Source:ZFIN;Acc:ZDB-GENE-060314-3]
ENSDARG00000006385	triobpb	triobpb	https://zfin.org/ZDB-GENE-061215-80	TRIO and F-actin binding protein b [Source:ZFIN;Acc:ZDB-GENE-061215-80]
ENSDARG00000034568	fitm2	fitm2	https://zfin.org/ZDB-GENE-050508-5	fat storage-inducing transmembrane protein 2 [Source:ZFIN;Acc:ZDB-GENE-050508-5]
ENSDARG00000058257	slc39a1	slc39a1	https://zfin.org/ZDB-GENE-030131-9917	solute carrier family 39 (zinc transporter), member 1 [Source:ZFIN;Acc:ZDB-GENE-030131-9917]
ENSDARG00000103659	bco1l	bco1l	https://zfin.org/ZDB-GENE-040426-1191	beta-carotene oxygenase 1, like [Source:ZFIN;Acc:ZDB-GENE-040426-1191]
ENSDARG00000057869	cdc42l2	cdc42l2	https://zfin.org/ZDB-GENE-060312-21	cell division cycle 42 like 2 [Source:ZFIN;Acc:ZDB-GENE-060312-21]
ENSDARG00000044923	ube2w	ube2w	https://zfin.org/ZDB-GENE-050506-94	ubiquitin-conjugating enzyme E2W (putative) [Source:ZFIN;Acc:ZDB-GENE-050506-94]
ENSDARG00000024654	pgm3	pgm3	https://zfin.org/ZDB-GENE-041024-13	phosphoglucomutase 3 [Source:ZFIN;Acc:ZDB-GENE-041024-13]
ENSDARG00000024324	arhgap1	arhgap1	https://zfin.org/ZDB-GENE-050417-305	Rho GTPase activating protein 1 [Source:ZFIN;Acc:ZDB-GENE-050417-305]
ENSDARG00000074266	si:ch1073-314i13.4	si:ch1073-314i13.4	https://zfin.org/ZDB-GENE-120214-41	si:ch1073-314i13.4 [Source:ZFIN;Acc:ZDB-GENE-120214-41]
ENSDARG00000045768	cry1aa	cry1aa	https://zfin.org/ZDB-GENE-010426-2	cryptochrome circadian clock 1aa [Source:ZFIN;Acc:ZDB-GENE-010426-2]
ENSDARG00000037930	rnf113a	rnf113a	https://zfin.org/ZDB-GENE-040825-1	ring finger protein 113A [Source:ZFIN;Acc:ZDB-GENE-040825-1]
ENSDARG00000079217	bbs9	bbs9	https://zfin.org/ZDB-GENE-081027-4	Bardet-Biedl syndrome 9 [Source:ZFIN;Acc:ZDB-GENE-081027-4]
ENSDARG00000045355	tceb1a	tceb1a	https://zfin.org/ZDB-GENE-040912-120	transcription elongation factor B (SIII), polypeptide 1a [Source:ZFIN;Acc:ZDB-GENE-040912-120]
ENSDARG00000038027	nol12	nol12	https://zfin.org/ZDB-GENE-040426-1035	nucleolar protein 12 [Source:ZFIN;Acc:ZDB-GENE-040426-1035]
ENSDARG00000046087	brd2b	brd2b	https://zfin.org/ZDB-GENE-070220-1	bromodomain containing 2b [Source:ZFIN;Acc:ZDB-GENE-070220-1]
ENSDARG00000098934	rrp7a	rrp7a	https://zfin.org/ZDB-GENE-050417-38	ribosomal RNA processing 7 homolog A [Source:ZFIN;Acc:ZDB-GENE-050417-38]
ENSDARG00000027589	fzd7b	fzd7b	https://zfin.org/ZDB-GENE-990415-229	frizzled class receptor 7b [Source:ZFIN;Acc:ZDB-GENE-990415-229]
ENSDARG00000026225	whsc1	whsc1	https://zfin.org/ZDB-GENE-030131-2581	Wolf-Hirschhorn syndrome candidate 1 [Source:ZFIN;Acc:ZDB-GENE-030131-2581]
ENSDARG00000068983	btbd9	btbd9	https://zfin.org/ZDB-GENE-040704-39	BTB (POZ) domain containing 9 [Source:ZFIN;Acc:ZDB-GENE-040704-39]
ENSDARG00000030650	r3hdml	r3hdml	https://zfin.org/ZDB-GENE-090313-275	R3H domain containing-like [Source:ZFIN;Acc:ZDB-GENE-090313-275]
ENSDARG00000009868	dcaf11	dcaf11	https://zfin.org/ZDB-GENE-050809-116	ddb1 and cul4 associated factor 11 [Source:ZFIN;Acc:ZDB-GENE-050809-116]
ENSDARG00000088699	pdzd8	pdzd8	https://zfin.org/ZDB-GENE-110310-2	PDZ domain containing 8 [Source:ZFIN;Acc:ZDB-GENE-110310-2]
ENSDARG00000052010	fam96b	fam96b	https://zfin.org/ZDB-GENE-040718-148	family with sequence similarity 96, member B [Source:ZFIN;Acc:ZDB-GENE-040718-148]
ENSDARG00000095826	smdt1a	smdt1a	https://zfin.org/ZDB-GENE-110411-114	single-pass membrane protein with aspartate-rich tail 1a [Source:ZFIN;Acc:ZDB-GENE-110411-114]
ENSDARG00000038028	ndufa6	ndufa6	https://zfin.org/ZDB-GENE-040426-1124	NADH dehydrogenase (ubiquinone) 1 alpha subcomplex, 6 [Source:ZFIN;Acc:ZDB-GENE-040426-1124]
ENSDARG00000092170	apoc1	apoc1	https://zfin.org/ZDB-GENE-030131-1074	apolipoprotein C-I [Source:ZFIN;Acc:ZDB-GENE-030131-1074]
ENSDARG00000044852	wbp2nl	wbp2nl	https://zfin.org/ZDB-GENE-030131-4012	WBP2 N-terminal like [Source:ZFIN;Acc:ZDB-GENE-030131-4012]
ENSDARG00000038025	cbx7a	cbx7a	https://zfin.org/ZDB-GENE-050417-400	chromobox homolog 7a [Source:ZFIN;Acc:ZDB-GENE-050417-400]
ENSDARG00000089917	sh3tc2	sh3tc2	https://zfin.org/ZDB-GENE-081104-347	SH3 domain and tetratricopeptide repeats 2 [Source:ZFIN;Acc:ZDB-GENE-081104-347]
ENSDARG00000101411	wbp11	wbp11	https://zfin.org/ZDB-GENE-040426-1829	WW domain binding protein 11 [Source:ZFIN;Acc:ZDB-GENE-040426-1829]
ENSDARG00000078111	ap5z1	ap5z1	https://zfin.org/ZDB-GENE-120508-2	adaptor-related protein complex 5, zeta 1 subunit [Source:ZFIN;Acc:ZDB-GENE-120508-2]
ENSDARG00000058533	pole	pole	https://zfin.org/ZDB-GENE-070705-557	polymerase (DNA directed), epsilon [Source:ZFIN;Acc:ZDB-GENE-070705-557]
ENSDARG00000006758	fam234b	fam234b	https://zfin.org/ZDB-GENE-030131-3308	family with sequence similarity 234, member B [Source:ZFIN;Acc:ZDB-GENE-030131-3308]
ENSDARG00000100741	cdc20	cdc20	https://zfin.org/ZDB-GENE-040426-2044	cell division cycle 20 homolog [Source:ZFIN;Acc:ZDB-GENE-040426-2044]
ENSDARG00000031647	stat2	stat2	https://zfin.org/ZDB-GENE-080321-1	signal transducer and activator of transcription 2 [Source:ZFIN;Acc:ZDB-GENE-080321-1]
ENSDARG00000069832	sfxn4	sfxn4	https://zfin.org/ZDB-GENE-050309-187	sideroflexin 4 [Source:ZFIN;Acc:ZDB-GENE-050309-187]
ENSDARG00000004115	mgat4b	mgat4b	https://zfin.org/ZDB-GENE-040704-19	mannosyl (alpha-1,3-)-glycoprotein beta-1,4-N-acetylglucosaminyltransferase, isozyme B [Source:ZFIN;Acc:ZDB-GENE-040704-19]
ENSDARG00000104875	bspry	bspry	https://zfin.org/ZDB-GENE-060526-219	B-box and SPRY domain containing [Source:ZFIN;Acc:ZDB-GENE-060526-219]
ENSDARG00000074262	nck1a	nck1a	https://zfin.org/ZDB-GENE-070912-547	NCK adaptor protein 1a [Source:ZFIN;Acc:ZDB-GENE-070912-547]
ENSDARG00000098924	suz12b	suz12b	https://zfin.org/ZDB-GENE-030131-3255	SUZ12 polycomb repressive complex 2b subunit [Source:ZFIN;Acc:ZDB-GENE-030131-3255]
ENSDARG00000104733	coq4	coq4	https://zfin.org/ZDB-GENE-060526-218	coenzyme Q4 homolog (S. cerevisiae) [Source:ZFIN;Acc:ZDB-GENE-060526-218]
ENSDARG00000045359	tceb1b	tceb1b	https://zfin.org/ZDB-GENE-040718-138	transcription elongation factor B (SIII), polypeptide 1b [Source:ZFIN;Acc:ZDB-GENE-040718-138]
ENSDARG00000098603	si:dkeyp-101f3.2	si:dkeyp-101f3.2	https://zfin.org/ZDB-GENE-141216-419	si:dkeyp-101f3.2 [Source:ZFIN;Acc:ZDB-GENE-141216-419]
ENSDARG00000099375	poldip3	poldip3	https://zfin.org/ZDB-GENE-120201-2	polymerase (DNA-directed), delta interacting protein 3 [Source:ZFIN;Acc:ZDB-GENE-120201-2]
ENSDARG00000100679	lrch3	lrch3	https://zfin.org/ZDB-GENE-071004-44	leucine-rich repeats and calponin homology (CH) domain containing 3 [Source:ZFIN;Acc:ZDB-GENE-071004-44]
ENSDARG00000099045	cacnb2a	cacnb2a	https://zfin.org/ZDB-GENE-080808-7	calcium channel, voltage-dependent, beta 2a [Source:ZFIN;Acc:ZDB-GENE-080808-7]
ENSDARG00000087749	ccser2a	ccser2a	https://zfin.org/ZDB-GENE-131121-492	coiled-coil serine-rich protein 2a [Source:ZFIN;Acc:ZDB-GENE-131121-492]
ENSDARG00000058206	si:ch211-153b23.5	si:ch211-153b23.5	https://zfin.org/ZDB-GENE-030131-9744	si:ch211-153b23.5 [Source:ZFIN;Acc:ZDB-GENE-030131-9744]
ENSDARG00000063321	rabl2	rabl2	https://zfin.org/ZDB-GENE-060503-464	RAB, member of RAS oncogene family-like 2 [Source:ZFIN;Acc:ZDB-GENE-060503-464]
ENSDARG00000095974	si:ch73-211l13.2	si:ch73-211l13.2	https://zfin.org/ZDB-GENE-110411-257	si:ch73-211l13.2 [Source:ZFIN;Acc:ZDB-GENE-110411-257]
ENSDARG00000071037	pex13	pex13	https://zfin.org/ZDB-GENE-040426-1544	peroxisomal biogenesis factor 13 [Source:ZFIN;Acc:ZDB-GENE-040426-1544]
ENSDARG00000061161	ube2j2	ube2j2	https://zfin.org/ZDB-GENE-070410-28	ubiquitin-conjugating enzyme E2, J2 (UBC6 homolog, yeast) [Source:ZFIN;Acc:ZDB-GENE-070410-28]
ENSDARG00000078348	tcf20	tcf20	https://zfin.org/ZDB-GENE-110411-97	transcription factor 20 [Source:ZFIN;Acc:ZDB-GENE-110411-97]
ENSDARG00000098726	rptor	rptor	https://zfin.org/ZDB-GENE-130530-685	regulatory associated protein of MTOR, complex 1 [Source:ZFIN;Acc:ZDB-GENE-130530-685]
ENSDARG00000100257	zgc:174314	zgc:174314	https://zfin.org/ZDB-GENE-080213-5	zgc:174314 [Source:ZFIN;Acc:ZDB-GENE-080213-5]
ENSDARG00000105382	HIST1H4A	HIST1H4A	https://zfin.org/ZDB-GENE-160113-92	si:ch73-368j24.2 [Source:ZFIN;Acc:ZDB-GENE-160113-92]
ENSDARG00000006093	cdk15	cdk15	https://zfin.org/ZDB-GENE-060421-7193	cyclin-dependent kinase 15 [Source:ZFIN;Acc:ZDB-GENE-060421-7193]
ENSDARG00000060068	fam98b	fam98b	https://zfin.org/ZDB-GENE-061201-63	family with sequence similarity 98, member B [Source:ZFIN;Acc:ZDB-GENE-061201-63]
ENSDARG00000061590	cachd1	cachd1	https://zfin.org/ZDB-GENE-100819-3	cache domain containing 1 [Source:ZFIN;Acc:ZDB-GENE-100819-3]
ENSDARG00000103432	exosc4	exosc4	https://zfin.org/ZDB-GENE-040426-1702	exosome component 4 [Source:ZFIN;Acc:ZDB-GENE-040426-1702]
ENSDARG00000098209	SIMC1	SIMC1	https://zfin.org/ZDB-GENE-141215-17	si:ch211-199b20.3 [Source:ZFIN;Acc:ZDB-GENE-141215-17]
ENSDARG00000097214	si:ch211-214o13.1	si:ch211-214o13.1	https://zfin.org/ZDB-GENE-131127-207	si:ch211-214o13.1 [Source:ZFIN;Acc:ZDB-GENE-131127-207]
ENSDARG00000091349	plekhd1	plekhd1	https://zfin.org/ZDB-GENE-130926-1	pleckstrin homology domain containing, family D (with coiled-coil domains) member 1 [Source:ZFIN;Acc:ZDB-GENE-130926-1]
ENSDARG00000080010	adh5	adh5	https://zfin.org/ZDB-GENE-011003-1	alcohol dehydrogenase 5 [Source:ZFIN;Acc:ZDB-GENE-011003-1]
ENSDARG00000021991	erlin1	erlin1	https://zfin.org/ZDB-GENE-050327-13	ER lipid raft associated 1 [Source:ZFIN;Acc:ZDB-GENE-050327-13]
ENSDARG00000020219	dld	dld	https://zfin.org/ZDB-GENE-990415-47	deltaD [Source:ZFIN;Acc:ZDB-GENE-990415-47]
ENSDARG00000020143	pah	pah	https://zfin.org/ZDB-GENE-031006-2	phenylalanine hydroxylase [Source:ZFIN;Acc:ZDB-GENE-031006-2]
ENSDARG00000102927	si:dkey-261o4.6	si:dkey-261o4.6	https://zfin.org/ZDB-GENE-131118-3	si:dkey-261o4.6 [Source:ZFIN;Acc:ZDB-GENE-131118-3]
ENSDARG00000062909	furina	furina	https://zfin.org/ZDB-GENE-040901-1	furin (paired basic amino acid cleaving enzyme) a [Source:ZFIN;Acc:ZDB-GENE-040901-1]
ENSDARG00000029100	chchd1	chchd1	https://zfin.org/ZDB-GENE-060810-176	coiled-coil-helix-coiled-coil-helix domain containing 1 [Source:ZFIN;Acc:ZDB-GENE-060810-176]
ENSDARG00000038658	murca	murca	https://zfin.org/ZDB-GENE-050506-21	muscle-related coiled-coil protein a [Source:ZFIN;Acc:ZDB-GENE-050506-21]
ENSDARG00000068978	glo1	glo1	https://zfin.org/ZDB-GENE-030722-9	glyoxalase 1 [Source:ZFIN;Acc:ZDB-GENE-030722-9]
ENSDARG00000075580	lrch2	lrch2	https://zfin.org/ZDB-GENE-080114-1	leucine-rich repeats and calponin homology (CH) domain containing 2 [Source:ZFIN;Acc:ZDB-GENE-080114-1]
ENSDARG00000100279	HIST2H2AB	HIST2H2AB.2	https://zfin.org/ZDB-GENE-030131-6292	zgc:165551 [Source:ZFIN;Acc:ZDB-GENE-030131-6292]
ENSDARG00000104129	si:dkey-23n7.10	si:dkey-23n7.10	https://zfin.org/ZDB-GENE-141222-64	si:dkey-23n7.10 [Source:ZFIN;Acc:ZDB-GENE-141222-64]
ENSDARG00000098397	si:ch73-59f11.2	si:ch73-59f11.2	https://zfin.org/ZDB-GENE-131127-566	si:ch73-59f11.2 [Source:ZFIN;Acc:ZDB-GENE-131127-566]
ENSDARG00000098244	si:dkey-19h16.7	si:dkey-19h16.7	https://zfin.org/ZDB-GENE-110914-214	si:dkey-19h16.7 [Source:ZFIN;Acc:ZDB-GENE-110914-214]
ENSDARG00000061923	amotl2a	amotl2a	https://zfin.org/ZDB-GENE-030131-9770	angiomotin like 2a [Source:ZFIN;Acc:ZDB-GENE-030131-9770]
ENSDARG00000005010	si:dkeyp-2e4.8	si:dkeyp-2e4.8	https://zfin.org/ZDB-GENE-061207-81	si:dkeyp-2e4.8 [Source:ZFIN;Acc:ZDB-GENE-061207-81]
ENSDARG00000012763	arl13b	arl13b	https://zfin.org/ZDB-GENE-021217-3	ADP-ribosylation factor-like 13b [Source:ZFIN;Acc:ZDB-GENE-021217-3]
ENSDARG00000075008	pask	pask	https://zfin.org/ZDB-GENE-030131-1394	PAS domain containing serine/threonine kinase [Source:ZFIN;Acc:ZDB-GENE-030131-1394]
ENSDARG00000062801	erfl3	erfl3	https://zfin.org/ZDB-GENE-090529-4	Ets2 repressor factor like 3 [Source:ZFIN;Acc:ZDB-GENE-090529-4]
ENSDARG00000037455	ugt8	ugt8	https://zfin.org/ZDB-GENE-060616-129	UDP glycosyltransferase 8 [Source:ZFIN;Acc:ZDB-GENE-060616-129]
ENSDARG00000092664	si:dkey-93m18.3	si:dkey-93m18.3	https://zfin.org/ZDB-GENE-091204-346	si:dkey-93m18.3 [Source:ZFIN;Acc:ZDB-GENE-091204-346]
ENSDARG00000077130	bcl10	bcl10	https://zfin.org/ZDB-GENE-100219-2	B-cell CLL/lymphoma 10 [Source:ZFIN;Acc:ZDB-GENE-100219-2]
ENSDARG00000027986	slc35d1b	slc35d1b	https://zfin.org/ZDB-GENE-040426-1213	solute carrier family 35 (UDP-GlcA/UDP-GalNAc transporter), member D1b [Source:ZFIN;Acc:ZDB-GENE-040426-1213]
ENSDARG00000075151	si:dkey-188i13.10	si:dkey-188i13.10	https://zfin.org/ZDB-GENE-090313-208	si:dkey-188i13.10 [Source:ZFIN;Acc:ZDB-GENE-090313-208]
ENSDARG00000041449	spred1	spred1	https://zfin.org/ZDB-GENE-040426-2338	sprouty-related, EVH1 domain containing 1 [Source:ZFIN;Acc:ZDB-GENE-040426-2338]
ENSDARG00000079857	si:ch211-189k9.2	si:ch211-189k9.2	https://zfin.org/ZDB-GENE-100405-5	si:ch211-189k9.2 [Source:ZFIN;Acc:ZDB-GENE-100405-5]
ENSDARG00000075766	sccpdha	sccpdha	https://zfin.org/ZDB-GENE-040718-51	saccharopine dehydrogenase a [Source:ZFIN;Acc:ZDB-GENE-040718-51]
ENSDARG00000032218	acss3	acss3	https://zfin.org/ZDB-GENE-060503-816	acyl-CoA synthetase short-chain family member 3 [Source:ZFIN;Acc:ZDB-GENE-060503-816]
ENSDARG00000060469	pik3r4	pik3r4	https://zfin.org/ZDB-GENE-050309-84	phosphoinositide-3-kinase, regulatory subunit 4 [Source:ZFIN;Acc:ZDB-GENE-050309-84]
ENSDARG00000034785	dachb	dachb	https://zfin.org/ZDB-GENE-020402-4	dachshund b [Source:ZFIN;Acc:ZDB-GENE-020402-4]
ENSDARG00000021022	ift57	ift57	https://zfin.org/ZDB-GENE-040614-1	intraflagellar transport 57 homolog (Chlamydomonas) [Source:ZFIN;Acc:ZDB-GENE-040614-1]
ENSDARG00000043734	trmu	trmu	https://zfin.org/ZDB-GENE-050522-540	tRNA 5-methylaminomethyl-2-thiouridylate methyltransferase [Source:ZFIN;Acc:ZDB-GENE-050522-540]
ENSDARG00000007245	rundc3aa	rundc3aa	https://zfin.org/ZDB-GENE-130530-533	RUN domain containing 3Aa [Source:ZFIN;Acc:ZDB-GENE-130530-533]
ENSDARG00000077126	snrnp70	snrnp70	https://zfin.org/ZDB-GENE-040825-2	small nuclear ribonucleoprotein 70 (U1) [Source:ZFIN;Acc:ZDB-GENE-040825-2]
ENSDARG00000070512	tnrc5	tnrc5	https://zfin.org/ZDB-GENE-050411-12	trinucleotide repeat containing 5 [Source:ZFIN;Acc:ZDB-GENE-050411-12]
ENSDARG00000092967	si:dkey-93m18.4	si:dkey-93m18.4	https://zfin.org/ZDB-GENE-091204-318	si:dkey-93m18.4 [Source:ZFIN;Acc:ZDB-GENE-091204-318]
ENSDARG00000103956	si:dkey-17o15.2	si:dkey-17o15.2	https://zfin.org/ZDB-GENE-030131-4187	si:dkey-17o15.2 [Source:ZFIN;Acc:ZDB-GENE-030131-4187]
ENSDARG00000061108	ep300b	ep300b	https://zfin.org/ZDB-GENE-080403-15	E1A binding protein p300 b [Source:ZFIN;Acc:ZDB-GENE-080403-15]
ENSDARG00000043334	ccdc6a	ccdc6a	https://zfin.org/ZDB-GENE-030131-7848	coiled-coil domain containing 6a [Source:ZFIN;Acc:ZDB-GENE-030131-7848]
ENSDARG00000104071	zgc:110091	zgc:110091	https://zfin.org/ZDB-GENE-050417-34	zgc:110091 [Source:ZFIN;Acc:ZDB-GENE-050417-34]
ENSDARG00000003200	foxm1	foxm1	https://zfin.org/ZDB-GENE-040426-1275	forkhead box M1 [Source:ZFIN;Acc:ZDB-GENE-040426-1275]
ENSDARG00000002213	invs	invs	https://zfin.org/ZDB-GENE-020507-2	inversin [Source:ZFIN;Acc:ZDB-GENE-020507-2]
ENSDARG00000097495	si:ch73-36j8.3	si:ch73-36j8.3	https://zfin.org/ZDB-GENE-131121-249	si:ch73-36j8.3 [Source:ZFIN;Acc:ZDB-GENE-131121-249]
ENSDARG00000063332	shank3a	shank3a	https://zfin.org/ZDB-GENE-060503-369	SH3 and multiple ankyrin repeat domains 3a [Source:ZFIN;Acc:ZDB-GENE-060503-369]
ENSDARG00000076526	gar1	gar1	https://zfin.org/ZDB-GENE-040426-893	GAR1 homolog, ribonucleoprotein [Source:ZFIN;Acc:ZDB-GENE-040426-893]
ENSDARG00000076128	prkar1aa	prkar1aa	https://zfin.org/ZDB-GENE-050116-2	protein kinase, cAMP-dependent, regulatory, type I, alpha (tissue specific extinguisher 1) a [Source:ZFIN;Acc:ZDB-GENE-050116-2]
ENSDARG00000100655	si:dkey-28k24.1	si:dkey-28k24.1	https://zfin.org/ZDB-GENE-141210-12	si:dkey-28k24.1 [Source:ZFIN;Acc:ZDB-GENE-141210-12]
ENSDARG00000058090	cfap57	cfap57	https://zfin.org/ZDB-GENE-110411-266	cilia and flagella associated protein 57 [Source:ZFIN;Acc:ZDB-GENE-110411-266]
ENSDARG00000078773	tmem70	tmem70	https://zfin.org/ZDB-GENE-070912-593	transmembrane protein 70 [Source:ZFIN;Acc:ZDB-GENE-070912-593]
ENSDARG00000093997	si:dkey-9i23.15	si:dkey-9i23.15	https://zfin.org/ZDB-GENE-090313-361	si:dkey-9i23.15 [Source:ZFIN;Acc:ZDB-GENE-090313-361]
ENSDARG00000020764	slmapb	slmapb	https://zfin.org/ZDB-GENE-040426-809	sarcolemma associated protein b [Source:ZFIN;Acc:ZDB-GENE-040426-809]
ENSDARG00000029406	h2afx	h2afx	https://zfin.org/ZDB-GENE-040426-987	H2A histone family, member X [Source:ZFIN;Acc:ZDB-GENE-040426-987]
ENSDARG00000094133	wu:fc21g02	wu:fc21g02	https://zfin.org/ZDB-GENE-030131-2925	wu:fc21g02 [Source:ZFIN;Acc:ZDB-GENE-030131-2925]
ENSDARG00000073820	zgc:174917	zgc:174917	https://zfin.org/ZDB-GENE-070928-42	zgc:174917 [Source:ZFIN;Acc:ZDB-GENE-070928-42]
ENSDARG00000098240	meis2a	meis2a	https://zfin.org/ZDB-GENE-020122-2	Meis homeobox 2a [Source:ZFIN;Acc:ZDB-GENE-020122-2]
ENSDARG00000078572	stox2b	stox2b	https://zfin.org/ZDB-GENE-130524-1	storkhead box 2b [Source:ZFIN;Acc:ZDB-GENE-130524-1]
ENSDARG00000058105	rpl36a	rpl36a	https://zfin.org/ZDB-GENE-020423-1	ribosomal protein L36A [Source:ZFIN;Acc:ZDB-GENE-020423-1]
ENSDARG00000102956	mmp17b	mmp17b	https://zfin.org/ZDB-GENE-081107-17	matrix metallopeptidase 17b [Source:ZFIN;Acc:ZDB-GENE-081107-17]
ENSDARG00000060584	si:dkey-226m8.9	si:dkey-226m8.9	https://zfin.org/ZDB-GENE-060526-260	si:dkey-226m8.9 [Source:ZFIN;Acc:ZDB-GENE-060526-260]
ENSDARG00000098711	si:ch1073-425j19.2	si:ch1073-425j19.2	https://zfin.org/ZDB-GENE-131127-522	si:ch1073-425j19.2 [Source:ZFIN;Acc:ZDB-GENE-131127-522]
ENSDARG00000034768	phf3	phf3	https://zfin.org/ZDB-GENE-090313-207	PHD finger protein 3 [Source:ZFIN;Acc:ZDB-GENE-090313-207]
ENSDARG00000097239	si:ch73-31d8.2	si:ch73-31d8.2	https://zfin.org/ZDB-GENE-030131-8387	si:ch73-31d8.2 [Source:ZFIN;Acc:ZDB-GENE-030131-8387]
ENSDARG00000100712	si:dkey-19b23.12	si:dkey-19b23.12	https://zfin.org/ZDB-GENE-141216-440	si:dkey-19b23.12 [Source:ZFIN;Acc:ZDB-GENE-141216-440]
ENSDARG00000032102	prdx3	prdx3	https://zfin.org/ZDB-GENE-030826-18	peroxiredoxin 3 [Source:ZFIN;Acc:ZDB-GENE-030826-18]
ENSDARG00000093656	si:dkeyp-2e4.6	si:dkeyp-2e4.6	https://zfin.org/ZDB-GENE-061009-50	si:dkeyp-2e4.6 [Source:ZFIN;Acc:ZDB-GENE-061009-50]
ENSDARG00000036040	atg13	atg13	https://zfin.org/ZDB-GENE-040426-1149	ATG13 autophagy related 13 homolog (S. cerevisiae) [Source:ZFIN;Acc:ZDB-GENE-040426-1149]
ENSDARG00000092000	znf1020	znf1020	https://zfin.org/ZDB-GENE-110913-31	zinc finger protein 1020 [Source:ZFIN;Acc:ZDB-GENE-110913-31]
ENSDARG00000092895	si:dkey-188i13.11	si:dkey-188i13.11	https://zfin.org/ZDB-GENE-090313-209	si:dkey-188i13.11 [Source:ZFIN;Acc:ZDB-GENE-090313-209]
ENSDARG00000095908	SAT1	SAT1	https://zfin.org/ZDB-GENE-040704-4	si:ch1073-228p2.2 [Source:ZFIN;Acc:ZDB-GENE-110411-88]
ENSDARG00000037872	foxk1	foxk1	https://zfin.org/ZDB-GENE-030131-6402	forkhead box K1 [Source:ZFIN;Acc:ZDB-GENE-030131-6402]
ENSDARG00000025789	chd4b	chd4b	https://zfin.org/ZDB-GENE-030131-4532	chromodomain helicase DNA binding protein 4b [Source:ZFIN;Acc:ZDB-GENE-030131-4532]
ENSDARG00000070461	zgc:154061	zgc:154061	https://zfin.org/ZDB-GENE-060929-922	zgc:154061 [Source:ZFIN;Acc:ZDB-GENE-060929-922]
ENSDARG00000044047	slc18b1	slc18b1	https://zfin.org/ZDB-GENE-050417-386	solute carrier family 18, subfamily B, member 1 [Source:ZFIN;Acc:ZDB-GENE-050417-386]
ENSDARG00000075990	acap3a	acap3a	https://zfin.org/ZDB-GENE-030131-1711	ArfGAP with coiled-coil, ankyrin repeat and PH domains 3a [Source:ZFIN;Acc:ZDB-GENE-030131-1711]
ENSDARG00000013023	nsun3	nsun3	https://zfin.org/ZDB-GENE-050706-95	NOP2/Sun domain family, member 3 [Source:ZFIN;Acc:ZDB-GENE-050706-95]
ENSDARG00000101036	traf2b	traf2b	https://zfin.org/ZDB-GENE-030131-5345	Tnf receptor-associated factor 2b [Source:ZFIN;Acc:ZDB-GENE-030131-5345]
ENSDARG00000062040	atp8b5a	atp8b5a	https://zfin.org/ZDB-GENE-060531-48	ATPase, class I, type 8B, member 5a [Source:ZFIN;Acc:ZDB-GENE-060531-48]
ENSDARG00000036164	cars	cars	https://zfin.org/ZDB-GENE-030328-29	cysteinyl-tRNA synthetase [Source:ZFIN;Acc:ZDB-GENE-030328-29]
ENSDARG00000013161	zgc:55558	zgc:55558	https://zfin.org/ZDB-GENE-040426-740	zgc:55558 [Source:ZFIN;Acc:ZDB-GENE-040426-740]
ENSDARG00000035564	dgcr8	dgcr8	https://zfin.org/ZDB-GENE-030131-3421	DGCR8 microprocessor complex subunit [Source:ZFIN;Acc:ZDB-GENE-030131-3421]
ENSDARG00000093130	si:dkey-82k12.7	si:dkey-82k12.7	https://zfin.org/ZDB-GENE-070912-594	si:dkey-82k12.7 [Source:ZFIN;Acc:ZDB-GENE-070912-594]
ENSDARG00000102856	si:ch73-59f11.3	si:ch73-59f11.3	https://zfin.org/ZDB-GENE-131121-446	si:ch73-59f11.3 [Source:ZFIN;Acc:ZDB-GENE-131121-446]
ENSDARG00000069199	zgc:172120	zgc:172120	https://zfin.org/ZDB-GENE-080204-46	zgc:172120 [Source:ZFIN;Acc:ZDB-GENE-080204-46]
ENSDARG00000074535	lingo2a	lingo2a	https://zfin.org/ZDB-GENE-080327-19	leucine rich repeat and Ig domain containing 2a [Source:ZFIN;Acc:ZDB-GENE-080327-19]
ENSDARG00000096045	SRR	SRR.1	https://zfin.org/ZDB-GENE-110914-210	si:ch73-263o4.4 [Source:ZFIN;Acc:ZDB-GENE-110914-210]
ENSDARG00000070124	ptpn23a	ptpn23a	https://zfin.org/ZDB-GENE-100921-24	protein tyrosine phosphatase, non-receptor type 23, a [Source:ZFIN;Acc:ZDB-GENE-100921-24]
ENSDARG00000070617	vhl	vhl	https://zfin.org/ZDB-GENE-070112-1042	von Hippel-Lindau tumor suppressor [Source:ZFIN;Acc:ZDB-GENE-070112-1042]
ENSDARG00000079834	kdf1a	kdf1a	https://zfin.org/ZDB-GENE-110411-156	keratinocyte differentiation factor 1a [Source:ZFIN;Acc:ZDB-GENE-110411-156]
ENSDARG00000053466	timmdc1	timmdc1	https://zfin.org/ZDB-GENE-050417-369	translocase of inner mitochondrial membrane domain containing 1 [Source:ZFIN;Acc:ZDB-GENE-050417-369]
ENSDARG00000007080	rhcgl1	rhcgl1	https://zfin.org/ZDB-GENE-060209-2	Rh family, C glycoprotein, like 1 [Source:ZFIN;Acc:ZDB-GENE-060209-2]
ENSDARG00000054980	ebna1bp2	ebna1bp2	https://zfin.org/ZDB-GENE-030131-6989	EBNA1 binding protein 2 [Source:ZFIN;Acc:ZDB-GENE-030131-6989]
ENSDARG00000058366	si:dkey-222f8.3	si:dkey-222f8.3	https://zfin.org/ZDB-GENE-030131-3658	si:dkey-222f8.3 [Source:ZFIN;Acc:ZDB-GENE-030131-3658]
ENSDARG00000098405	map3k1	map3k1	https://zfin.org/ZDB-GENE-090313-412	mitogen-activated protein kinase kinase kinase 1, E3 ubiquitin protein ligase [Source:ZFIN;Acc:ZDB-GENE-090313-412]
ENSDARG00000102753	si:ch211-240l14.1	si:ch211-240l14.1	https://zfin.org/ZDB-GENE-040724-59	si:ch211-240l14.1 [Source:ZFIN;Acc:ZDB-GENE-040724-59]
ENSDARG00000036426	CDA	CDA	https://zfin.org/ZDB-GENE-041114-88	zgc:103586 [Source:ZFIN;Acc:ZDB-GENE-041114-88]
ENSDARG00000068220	hbl3	hbl3	https://zfin.org/ZDB-GENE-000427-2	hexose-binding lectin 3 [Source:ZFIN;Acc:ZDB-GENE-000427-2]
ENSDARG00000102917	si:ch211-199m9.3	si:ch211-199m9.3	https://zfin.org/ZDB-GENE-110914-18	si:ch211-199m9.3 [Source:ZFIN;Acc:ZDB-GENE-110914-18]
ENSDARG00000036785	si:ch211-226m16.2	si:ch211-226m16.2	https://zfin.org/ZDB-GENE-030131-2302	si:ch211-226m16.2 [Source:ZFIN;Acc:ZDB-GENE-030131-2302]
ENSDARG00000008803	marcksb	marcksb	https://zfin.org/ZDB-GENE-030131-1921	myristoylated alanine-rich protein kinase C substrate b [Source:ZFIN;Acc:ZDB-GENE-030131-1921]
ENSDARG00000054950	eef2kmt	eef2kmt	https://zfin.org/ZDB-GENE-041010-160	eukaryotic elongation factor 2 lysine methyltransferase [Source:ZFIN;Acc:ZDB-GENE-041010-160]
ENSDARG00000062770	snx21	snx21	https://zfin.org/ZDB-GENE-061013-557	sorting nexin family member 21 [Source:ZFIN;Acc:ZDB-GENE-061013-557]
ENSDARG00000103381	si:ch211-199m9.2	si:ch211-199m9.2	https://zfin.org/ZDB-GENE-110913-32	si:ch211-199m9.2 [Source:ZFIN;Acc:ZDB-GENE-110913-32]
ENSDARG00000069589	tmem222a	tmem222a	https://zfin.org/ZDB-GENE-050306-17	transmembrane protein 222a [Source:ZFIN;Acc:ZDB-GENE-050306-17]
ENSDARG00000103581	si:ch211-212k5.1	si:ch211-212k5.1	https://zfin.org/ZDB-GENE-110914-19	si:ch211-212k5.1 [Source:ZFIN;Acc:ZDB-GENE-110914-19]
ENSDARG00000033614	rasgef1ba	rasgef1ba	https://zfin.org/ZDB-GENE-030131-5783	RasGEF domain family, member 1Ba [Source:ZFIN;Acc:ZDB-GENE-030131-5783]
ENSDARG00000088612	si:ch211-153b23.7	si:ch211-153b23.7	https://zfin.org/ZDB-GENE-141216-14	si:ch211-153b23.7 [Source:ZFIN;Acc:ZDB-GENE-141216-14]
ENSDARG00000104697	si:dkey-57k17.1	si:dkey-57k17.1	https://zfin.org/ZDB-GENE-110913-105	si:dkey-57k17.1 [Source:ZFIN;Acc:ZDB-GENE-110913-105]
ENSDARG00000003869	decr1	decr1	https://zfin.org/ZDB-GENE-040718-142	2,4-dienoyl CoA reductase 1, mitochondrial [Source:ZFIN;Acc:ZDB-GENE-040718-142]
ENSDARG00000098707	si:ch211-212k5.4	si:ch211-212k5.4	https://zfin.org/ZDB-GENE-110914-68	si:ch211-212k5.4 [Source:ZFIN;Acc:ZDB-GENE-110914-68]
ENSDARG00000054963	alg1	alg1	https://zfin.org/ZDB-GENE-030131-6093	ALG1, chitobiosyldiphosphodolichol beta-mannosyltransferase [Source:ZFIN;Acc:ZDB-GENE-030131-6093]
ENSDARG00000097892	si:ch211-252f13.6	si:ch211-252f13.6	https://zfin.org/ZDB-GENE-131127-312	si:ch211-252f13.6 [Source:ZFIN;Acc:ZDB-GENE-131127-312]
ENSDARG00000105375	si:ch211-285c6.5	si:ch211-285c6.5	https://zfin.org/ZDB-GENE-160113-125	si:ch211-285c6.5 [Source:ZFIN;Acc:ZDB-GENE-160113-125]
ENSDARG00000042839	dph6	dph6	https://zfin.org/ZDB-GENE-050227-15	diphthamine biosynthesis 6 [Source:ZFIN;Acc:ZDB-GENE-050227-15]
ENSDARG00000079234	si:ch211-285c6.2	si:ch211-285c6.2	https://zfin.org/ZDB-GENE-040724-168	si:ch211-285c6.2 [Source:ZFIN;Acc:ZDB-GENE-040724-168]
ENSDARG00000101126	atad5b	atad5b	https://zfin.org/ZDB-GENE-030131-338	ATPase family, AAA domain containing 5b [Source:ZFIN;Acc:ZDB-GENE-030131-338]
ENSDARG00000105266	si:dkey-16p6.1	si:dkey-16p6.1	https://zfin.org/ZDB-GENE-081103-43	si:dkey-16p6.1 [Source:ZFIN;Acc:ZDB-GENE-081103-43]
ENSDARG00000055502	cicb	cicb	https://zfin.org/ZDB-GENE-030131-1966	capicua transcriptional repressor b [Source:ZFIN;Acc:ZDB-GENE-030131-1966]
ENSDARG00000030357	zgc:66313	zgc:66313	https://zfin.org/ZDB-GENE-040426-1606	zgc:66313 [Source:ZFIN;Acc:ZDB-GENE-040426-1606]
ENSDARG00000038024	flr	flr	https://zfin.org/ZDB-GENE-070117-2066	fleer [Source:ZFIN;Acc:ZDB-GENE-070117-2066]
ENSDARG00000095497	si:dkeyp-2e4.5	si:dkeyp-2e4.5	https://zfin.org/ZDB-GENE-061009-49	si:dkeyp-2e4.5 [Source:ZFIN;Acc:ZDB-GENE-061009-49]
ENSDARG00000079124	MTERF4	MTERF4	https://zfin.org/ZDB-GENE-070912-693	si:dkeyp-94h10.5 [Source:ZFIN;Acc:ZDB-GENE-070912-693]
ENSDARG00000100548	tefm	tefm	https://zfin.org/ZDB-GENE-060825-345	transcription elongation factor, mitochondrial [Source:ZFIN;Acc:ZDB-GENE-060825-345]
ENSDARG00000032951	nrbp2a	nrbp2a	https://zfin.org/ZDB-GENE-070713-4	nuclear receptor binding protein 2a [Source:ZFIN;Acc:ZDB-GENE-070713-4]
ENSDARG00000086678	ascc3	ascc3	https://zfin.org/ZDB-GENE-130214-2	activating signal cointegrator 1 complex subunit 3 [Source:ZFIN;Acc:ZDB-GENE-130214-2]
ENSDARG00000098825	farsa	farsa	https://zfin.org/ZDB-GENE-050512-2	phenylalanyl-tRNA synthetase, alpha subunit [Source:ZFIN;Acc:ZDB-GENE-050512-2]
ENSDARG00000105465	hnrnpa0a	hnrnpa0a	https://zfin.org/
ENSDARG00000074071	zgc:123335	zgc:123335	https://zfin.org/ZDB-GENE-051113-228	zgc:123335 [Source:ZFIN;Acc:ZDB-GENE-051113-228]
ENSDARG00000102028	si:dkey-51d8.3	si:dkey-51d8.3	https://zfin.org/ZDB-GENE-081103-8	si:dkey-51d8.3 [Source:ZFIN;Acc:ZDB-GENE-081103-8]
ENSDARG00000103371	si:dkey-190j3.6	si:dkey-190j3.6	https://zfin.org/ZDB-GENE-050208-480	si:dkey-190j3.6 [Source:ZFIN;Acc:ZDB-GENE-050208-480]
ENSDARG00000056627	cxcl14	cxcl14	https://zfin.org/ZDB-GENE-000619-1	chemokine (C-X-C motif) ligand 14 [Source:ZFIN;Acc:ZDB-GENE-000619-1]
ENSDARG00000055561	c1galt1b	c1galt1b	https://zfin.org/ZDB-GENE-030131-9075	core 1 synthase, glycoprotein-N-acetylgalactosamine 3-beta-galactosyltransferase, 1b [Source:ZFIN;Acc:ZDB-GENE-030131-9075]
ENSDARG00000014941	tprkb	tprkb	https://zfin.org/ZDB-GENE-041114-68	Tp53rk binding protein [Source:ZFIN;Acc:ZDB-GENE-041114-68]
ENSDARG00000074244	arhgef10lb	arhgef10lb	https://zfin.org/ZDB-GENE-090313-222	Rho guanine nucleotide exchange factor (GEF) 10-like b [Source:ZFIN;Acc:ZDB-GENE-090313-222]
ENSDARG00000089302	hnrnpa0a	hnrnpa0a.1	https://zfin.org/ZDB-GENE-030131-2249	heterogeneous nuclear ribonucleoprotein A0a [Source:ZFIN;Acc:ZDB-GENE-030131-2249]
ENSDARG00000075014	sqstm1	sqstm1	https://zfin.org/ZDB-GENE-040426-2204	sequestosome 1 [Source:ZFIN;Acc:ZDB-GENE-040426-2204]
ENSDARG00000037291	dpf2l	dpf2l	https://zfin.org/ZDB-GENE-030131-5132	D4, zinc and double PHD fingers family 2, like [Source:ZFIN;Acc:ZDB-GENE-030131-5132]
ENSDARG00000039521	ssx2ipa	ssx2ipa	https://zfin.org/ZDB-GENE-040426-1756	synovial sarcoma, X breakpoint 2 interacting protein a [Source:ZFIN;Acc:ZDB-GENE-040426-1756]
ENSDARG00000099304	si:ch211-51f19.1	si:ch211-51f19.1	https://zfin.org/ZDB-GENE-141216-485	si:ch211-51f19.1 [Source:ZFIN;Acc:ZDB-GENE-141216-485]
ENSDARG00000105414	HIST1H2BA	HIST1H2BA.3	https://zfin.org/ZDB-GENE-160113-100	si:ch73-368j24.10 [Source:ZFIN;Acc:ZDB-GENE-160113-100]
ENSDARG00000092327	si:dkeyp-2e4.3	si:dkeyp-2e4.3	https://zfin.org/ZDB-GENE-061009-48	si:dkeyp-2e4.3 [Source:ZFIN;Acc:ZDB-GENE-061009-48]
ENSDARG00000015866	apoa2	apoa2	https://zfin.org/ZDB-GENE-030131-1046	apolipoprotein A-II [Source:ZFIN;Acc:ZDB-GENE-030131-1046]
ENSDARG00000056647	klhl3	klhl3	https://zfin.org/ZDB-GENE-120203-4	kelch-like family member 3 [Source:ZFIN;Acc:ZDB-GENE-120203-4]
ENSDARG00000078911	zgc:163098	zgc:163098	https://zfin.org/ZDB-GENE-070410-141	zgc:163098 [Source:ZFIN;Acc:ZDB-GENE-070410-141]
ENSDARG00000099371	cygb1	cygb1	https://zfin.org/ZDB-GENE-020513-1	cytoglobin 1 [Source:ZFIN;Acc:ZDB-GENE-020513-1]
ENSDARG00000045360	flj11011l	flj11011l	https://zfin.org/ZDB-GENE-050113-1	hypothetical protein FLJ11011-like (H. sapiens) [Source:ZFIN;Acc:ZDB-GENE-050113-1]
ENSDARG00000076779	fam13b	fam13b	https://zfin.org/ZDB-GENE-030131-4913	family with sequence similarity 13, member B [Source:ZFIN;Acc:ZDB-GENE-030131-4913]
ENSDARG00000099923	MGAT4D	MGAT4D	https://zfin.org/ZDB-GENE-061103-283	zgc:154054 [Source:ZFIN;Acc:ZDB-GENE-061103-283]
ENSDARG00000021739	klhl24a	klhl24a	https://zfin.org/ZDB-GENE-061013-572	kelch-like family member 24a [Source:ZFIN;Acc:ZDB-GENE-061013-572]
ENSDARG00000061205	stag1a	stag1a	https://zfin.org/ZDB-GENE-070912-448	stromal antigen 1a [Source:ZFIN;Acc:ZDB-GENE-070912-448]
ENSDARG00000068265	tomm5	tomm5	https://zfin.org/ZDB-GENE-040724-90	translocase of outer mitochondrial membrane 5 homolog (yeast) [Source:ZFIN;Acc:ZDB-GENE-040724-90]
ENSDARG00000030804	fam120b	fam120b	https://zfin.org/ZDB-GENE-040801-119	family with sequence similarity 120B [Source:ZFIN;Acc:ZDB-GENE-040801-119]
ENSDARG00000068264	grhpra	grhpra	https://zfin.org/ZDB-GENE-040724-230	glyoxylate reductase/hydroxypyruvate reductase a [Source:ZFIN;Acc:ZDB-GENE-040724-230]
ENSDARG00000070266	spock3	spock3	https://zfin.org/ZDB-GENE-090311-24	sparc/osteonectin, cwcv and kazal-like domains proteoglycan (testican) 3 [Source:ZFIN;Acc:ZDB-GENE-090311-24]
ENSDARG00000062929	FAM83G	FAM83G	https://zfin.org/ZDB-GENE-121214-254	si:dkeyp-9d4.4 [Source:ZFIN;Acc:ZDB-GENE-121214-254]
ENSDARG00000037560	mtm1	mtm1	https://zfin.org/ZDB-GENE-051113-128	myotubularin 1 [Source:ZFIN;Acc:ZDB-GENE-051113-128]
ENSDARG00000022668	grapb	grapb	https://zfin.org/ZDB-GENE-050913-4	GRB2-related adaptor protein b [Source:ZFIN;Acc:ZDB-GENE-050913-4]
ENSDARG00000022951	pth2	pth2	https://zfin.org/ZDB-GENE-041102-1	parathyroid hormone 2 [Source:ZFIN;Acc:ZDB-GENE-041102-1]
ENSDARG00000011941	bmpr2a	bmpr2a	https://zfin.org/ZDB-GENE-070618-1	bone morphogenetic protein receptor, type II a (serine/threonine kinase) [Source:ZFIN;Acc:ZDB-GENE-070618-1]
ENSDARG00000038910	pccb	pccb	https://zfin.org/ZDB-GENE-040426-2467	propionyl CoA carboxylase, beta polypeptide [Source:ZFIN;Acc:ZDB-GENE-040426-2467]
ENSDARG00000100222	utrn	utrn	https://zfin.org/ZDB-GENE-070228-6	utrophin [Source:ZFIN;Acc:ZDB-GENE-070228-6]
ENSDARG00000104256	bco1	bco1	https://zfin.org/ZDB-GENE-010508-1	beta-carotene oxygenase 1 [Source:ZFIN;Acc:ZDB-GENE-010508-1]
ENSDARG00000060309	srgap3	srgap3	https://zfin.org/ZDB-GENE-060524-4	SLIT-ROBO Rho GTPase activating protein 3 [Source:ZFIN;Acc:ZDB-GENE-060524-4]
ENSDARG00000070792	lrrc15	lrrc15	https://zfin.org/ZDB-GENE-031113-8	leucine rich repeat containing 15 [Source:ZFIN;Acc:ZDB-GENE-031113-8]
ENSDARG00000042590	rbm19	rbm19	https://zfin.org/ZDB-GENE-031125-3	RNA binding motif protein 19 [Source:ZFIN;Acc:ZDB-GENE-031125-3]
ENSDARG00000090342	CFAP100	CFAP100	https://zfin.org/	cilia and flagella associated protein 100 [Source:HGNC Symbol;Acc:HGNC:26842]
ENSDARG00000017835	brf1a	brf1a	https://zfin.org/ZDB-GENE-030131-6334	BRF1, RNA polymerase III transcription initiation factor a [Source:ZFIN;Acc:ZDB-GENE-030131-6334]
ENSDARG00000076462	ndnfl	ndnfl	https://zfin.org/ZDB-GENE-131127-464	neuron-derived neurotrophic factor , like [Source:ZFIN;Acc:ZDB-GENE-131127-464]
ENSDARG00000090803	si:dkey-156n14.3	si:dkey-156n14.3	https://zfin.org/
ENSDARG00000093041	si:ch211-234c11.2	si:ch211-234c11.2	https://zfin.org/ZDB-GENE-110914-70	si:ch211-234c11.2 [Source:ZFIN;Acc:ZDB-GENE-110914-70]
ENSDARG00000101526	si:dkey-82o10.4	si:dkey-82o10.4	https://zfin.org/ZDB-GENE-141222-46	si:dkey-82o10.4 [Source:ZFIN;Acc:ZDB-GENE-141222-46]
ENSDARG00000068221	hbl1	hbl1	https://zfin.org/ZDB-GENE-070912-285	hexose-binding lectin 1 [Source:ZFIN;Acc:ZDB-GENE-070912-285]
ENSDARG00000020442	snx5	snx5	https://zfin.org/ZDB-GENE-040426-2857	sorting nexin 5 [Source:ZFIN;Acc:ZDB-GENE-040426-2857]
ENSDARG00000095283	si:dkeyp-2e4.3	si:dkeyp-2e4.3.1	https://zfin.org/ZDB-GENE-061009-48	si:dkeyp-2e4.3 [Source:ZFIN;Acc:ZDB-GENE-061009-48]
ENSDARG00000094681	hbl2	hbl2	https://zfin.org/ZDB-GENE-070912-286	hexose-binding lectin 2 [Source:ZFIN;Acc:ZDB-GENE-070912-286]
ENSDARG00000088764	lyplal1	lyplal1	https://zfin.org/ZDB-GENE-050306-32	lysophospholipase-like 1 [Source:ZFIN;Acc:ZDB-GENE-050306-32]
ENSDARG00000002217	scocb	scocb	https://zfin.org/ZDB-GENE-041010-41	short coiled-coil protein b [Source:ZFIN;Acc:ZDB-GENE-041010-41]
ENSDARG00000023587	kcnk5a	kcnk5a	https://zfin.org/ZDB-GENE-051113-112	potassium channel, subfamily K, member 5a [Source:ZFIN;Acc:ZDB-GENE-051113-112]
ENSDARG00000076895	flrt3	flrt3	https://zfin.org/ZDB-GENE-030131-1988	fibronectin leucine rich transmembrane 3 [Source:ZFIN;Acc:ZDB-GENE-030131-1988]
ENSDARG00000073709	FAM149A	FAM149A	https://zfin.org/ZDB-GENE-081107-36	si:ch211-51g4.5 [Source:ZFIN;Acc:ZDB-GENE-081107-36]
ENSDARG00000099139	fbxw5	fbxw5	https://zfin.org/ZDB-GENE-040426-2571	F-box and WD repeat domain containing 5 [Source:ZFIN;Acc:ZDB-GENE-040426-2571]
ENSDARG00000032601	macrod2	macrod2	https://zfin.org/ZDB-GENE-040426-1490	MACRO domain containing 2 [Source:ZFIN;Acc:ZDB-GENE-040426-1490]
ENSDARG00000036965	rnf24	rnf24	https://zfin.org/ZDB-GENE-041114-40	ring finger protein 24 [Source:ZFIN;Acc:ZDB-GENE-041114-40]
ENSDARG00000000943	dzip1	dzip1	https://zfin.org/ZDB-GENE-040526-1	DAZ interacting zinc finger protein 1 [Source:ZFIN;Acc:ZDB-GENE-040526-1]
ENSDARG00000026907	slc48a1a	slc48a1a	https://zfin.org/ZDB-GENE-040718-121	solute carrier family 48 (heme transporter), member 1a [Source:ZFIN;Acc:ZDB-GENE-040718-121]
ENSDARG00000054984	zbtb41	zbtb41	https://zfin.org/ZDB-GENE-130530-649	zinc finger and BTB domain containing 41 [Source:ZFIN;Acc:ZDB-GENE-130530-649]
ENSDARG00000099445	cc2d1b	cc2d1b	https://zfin.org/ZDB-GENE-030131-1426	coiled-coil and C2 domain containing 1B [Source:ZFIN;Acc:ZDB-GENE-030131-1426]
ENSDARG00000069192	zgc:163030	zgc:163030	https://zfin.org/ZDB-GENE-060810-77	zgc:163030 [Source:ZFIN;Acc:ZDB-GENE-060810-77]
ENSDARG00000011449	fes	fes	https://zfin.org/ZDB-GENE-100812-10	FES proto-oncogene, tyrosine kinase [Source:ZFIN;Acc:ZDB-GENE-100812-10]
ENSDARG00000075561	si:dkey-76k16.5	si:dkey-76k16.5	https://zfin.org/ZDB-GENE-090313-330	si:dkey-76k16.5 [Source:ZFIN;Acc:ZDB-GENE-090313-330]
ENSDARG00000061066	c2cd2l	c2cd2l	https://zfin.org/ZDB-GENE-041019-1	c2cd2-like [Source:ZFIN;Acc:ZDB-GENE-041019-1]
ENSDARG00000012972	cfl1l	cfl1l	https://zfin.org/ZDB-GENE-040426-2770	cofilin 1 (non-muscle), like [Source:ZFIN;Acc:ZDB-GENE-040426-2770]
ENSDARG00000079784	TMEM71	TMEM71	https://zfin.org/ZDB-GENE-070912-222	si:ch211-235o23.1 [Source:ZFIN;Acc:ZDB-GENE-070912-222]
ENSDARG00000036545	TMPRSS3	TMPRSS3	https://zfin.org/ZDB-GENE-090312-200	si:dkey-22n8.2 [Source:ZFIN;Acc:ZDB-GENE-090312-200]
ENSDARG00000013763	RRBP1	RRBP1	https://zfin.org/ZDB-GENE-080401-3	zgc:171356 [Source:ZFIN;Acc:ZDB-GENE-080401-3]
ENSDARG00000076272	znf1041	znf1041	https://zfin.org/ZDB-GENE-080213-11	zinc finger protein 1041 [Source:ZFIN;Acc:ZDB-GENE-080213-11]
ENSDARG00000075820	si:ch73-289h5.1	si:ch73-289h5.1	https://zfin.org/ZDB-GENE-110913-36	si:ch73-289h5.1 [Source:ZFIN;Acc:ZDB-GENE-110913-36]
ENSDARG00000096007	znf1067	znf1067	https://zfin.org/ZDB-GENE-110913-170	zinc finger protein 1067 [Source:ZFIN;Acc:ZDB-GENE-110913-170]
ENSDARG00000092155	apoc2	apoc2	https://zfin.org/ZDB-GENE-030131-2168	apolipoprotein C-II [Source:ZFIN;Acc:ZDB-GENE-030131-2168]
ENSDARG00000104537	cox7c	cox7c	https://zfin.org/ZDB-GENE-030131-8062	cytochrome c oxidase, subunit VIIc [Source:ZFIN;Acc:ZDB-GENE-030131-8062]
ENSDARG00000102746	tmem39a	tmem39a	https://zfin.org/ZDB-GENE-030131-1928	transmembrane protein 39A [Source:ZFIN;Acc:ZDB-GENE-030131-1928]
ENSDARG00000025212	cpsf3l	cpsf3l	https://zfin.org/ZDB-GENE-050522-13	cleavage and polyadenylation specific factor 3-like [Source:ZFIN;Acc:ZDB-GENE-050522-13]
ENSDARG00000036038	harbi1	harbi1	https://zfin.org/ZDB-GENE-040608-1	harbinger transposase derived 1 [Source:ZFIN;Acc:ZDB-GENE-040608-1]
ENSDARG00000062991	abi1b	abi1b	https://zfin.org/ZDB-GENE-060929-1182	abl-interactor 1b [Source:ZFIN;Acc:ZDB-GENE-060929-1182]
ENSDARG00000015722	kctd5a	kctd5a	https://zfin.org/ZDB-GENE-030131-727	potassium channel tetramerization domain containing 5a [Source:ZFIN;Acc:ZDB-GENE-030131-727]
ENSDARG00000007795	cst3	cst3	https://zfin.org/ZDB-GENE-030131-373	cystatin C (amyloid angiopathy and cerebral hemorrhage) [Source:ZFIN;Acc:ZDB-GENE-030131-373]
ENSDARG00000005943	htra4	htra4	https://zfin.org/ZDB-GENE-131120-192	HtrA serine peptidase 4 [Source:ZFIN;Acc:ZDB-GENE-131120-192]
ENSDARG00000093615	si:ch211-234c11.3	si:ch211-234c11.3	https://zfin.org/ZDB-GENE-110914-93	si:ch211-234c11.3 [Source:ZFIN;Acc:ZDB-GENE-110914-93]
ENSDARG00000016656	mgme1	mgme1	https://zfin.org/ZDB-GENE-041212-68	mitochondrial genome maintenance exonuclease 1 [Source:ZFIN;Acc:ZDB-GENE-041212-68]
ENSDARG00000070021	cyp3c4	cyp3c4	https://zfin.org/ZDB-GENE-060929-96	cytochrome P450, family 3, subfamily C, polypeptide 4 [Source:ZFIN;Acc:ZDB-GENE-060929-96]
ENSDARG00000022895	mcf2a	mcf2a	https://zfin.org/ZDB-GENE-030616-52	MCF.2 cell line derived transforming sequence a [Source:ZFIN;Acc:ZDB-GENE-030616-52]
ENSDARG00000092281	si:ch211-222g5.6	si:ch211-222g5.6	https://zfin.org/ZDB-GENE-090313-85	si:ch211-222g5.6 [Source:ZFIN;Acc:ZDB-GENE-090313-85]
ENSDARG00000007745	uqcrfs1	uqcrfs1	https://zfin.org/ZDB-GENE-040426-2060	ubiquinol-cytochrome c reductase, Rieske iron-sulfur polypeptide 1 [Source:ZFIN;Acc:ZDB-GENE-040426-2060]
ENSDARG00000006514	her6	her6	https://zfin.org/ZDB-GENE-980526-144	hairy-related 6 [Source:ZFIN;Acc:ZDB-GENE-980526-144]
ENSDARG00000059760	wdtc1	wdtc1	https://zfin.org/ZDB-GENE-030131-3224	WD and tetratricopeptide repeats 1 [Source:ZFIN;Acc:ZDB-GENE-030131-3224]
ENSDARG00000039522	tubb2	tubb2	https://zfin.org/ZDB-GENE-050522-384	tubulin, beta 2A class IIa [Source:ZFIN;Acc:ZDB-GENE-050522-384]
ENSDARG00000095821	si:dkey-122a22.2	si:dkey-122a22.2	https://zfin.org/ZDB-GENE-110411-93	si:dkey-122a22.2 [Source:ZFIN;Acc:ZDB-GENE-110411-93]
ENSDARG00000076924	als2b	als2b	https://zfin.org/ZDB-GENE-080929-1	amyotrophic lateral sclerosis 2b (juvenile) [Source:ZFIN;Acc:ZDB-GENE-080929-1]
ENSDARG00000088145	atg4db	atg4db	https://zfin.org/ZDB-GENE-131025-1	autophagy related 4D, cysteine peptidase b [Source:ZFIN;Acc:ZDB-GENE-131025-1]
ENSDARG00000086245	si:dkeyp-121d2.7	si:dkeyp-121d2.7	https://zfin.org/ZDB-GENE-141215-52	si:dkeyp-121d2.7 [Source:ZFIN;Acc:ZDB-GENE-141215-52]
ENSDARG00000071336	mif	mif	https://zfin.org/ZDB-GENE-080708-1	macrophage migration inhibitory factor [Source:ZFIN;Acc:ZDB-GENE-080708-1]
ENSDARG00000069723	zbbx	zbbx	https://zfin.org/ZDB-GENE-061207-76	zinc finger, B-box domain containing [Source:ZFIN;Acc:ZDB-GENE-061207-76]
ENSDARG00000104187	si:ch211-69m16.2	si:ch211-69m16.2	https://zfin.org/ZDB-GENE-141216-289	si:ch211-69m16.2 [Source:ZFIN;Acc:ZDB-GENE-141216-289]
ENSDARG00000001825	cfap43	cfap43	https://zfin.org/ZDB-GENE-080815-3	cilia and flagella associated protein 43 [Source:ZFIN;Acc:ZDB-GENE-080815-3]
ENSDARG00000055885	tex10	tex10	https://zfin.org/ZDB-GENE-040426-2827	testis expressed 10 [Source:ZFIN;Acc:ZDB-GENE-040426-2827]
ENSDARG00000036968	SERPINA10	SERPINA10	https://zfin.org/ZDB-GENE-131127-199	si:ch1073-416d2.3 [Source:ZFIN;Acc:ZDB-GENE-131127-199]
ENSDARG00000037932	lin7b	lin7b	https://zfin.org/ZDB-GENE-041011-1	lin-7 homolog B (C. elegans) [Source:ZFIN;Acc:ZDB-GENE-041011-1]
ENSDARG00000079263	si:dkeyp-2e4.2	si:dkeyp-2e4.2	https://zfin.org/ZDB-GENE-030131-9307	si:dkeyp-2e4.2 [Source:ZFIN;Acc:ZDB-GENE-030131-9307]
ENSDARG00000095288	rusc2	rusc2	https://zfin.org/ZDB-GENE-060526-131	RUN and SH3 domain containing 2 [Source:ZFIN;Acc:ZDB-GENE-060526-131]
ENSDARG00000091366	si:dkey-84k17.2	si:dkey-84k17.2	https://zfin.org/ZDB-GENE-131121-397	si:dkey-84k17.2 [Source:ZFIN;Acc:ZDB-GENE-131121-397]
ENSDARG00000030514	acsl1a	acsl1a	https://zfin.org/ZDB-GENE-050809-115	acyl-CoA synthetase long-chain family member 1a [Source:ZFIN;Acc:ZDB-GENE-050809-115]
ENSDARG00000021974	sfr1	sfr1	https://zfin.org/ZDB-GENE-070410-27	SWI5-dependent homologous recombination repair protein 1 [Source:ZFIN;Acc:ZDB-GENE-070410-27]
ENSDARG00000034042	dnal1	dnal1	https://zfin.org/ZDB-GENE-040801-178	dynein, axonemal, light chain 1 [Source:ZFIN;Acc:ZDB-GENE-040801-178]
ENSDARG00000087562	znf1036	znf1036	https://zfin.org/ZDB-GENE-110913-155	zinc finger protein 1036 [Source:ZFIN;Acc:ZDB-GENE-110913-155]
ENSDARG00000097253	yeats2	yeats2	https://zfin.org/ZDB-GENE-081104-292	YEATS domain containing 2 [Source:ZFIN;Acc:ZDB-GENE-081104-292]
ENSDARG00000096157	si:dkey-40n15.1	si:dkey-40n15.1	https://zfin.org/ZDB-GENE-110914-64	si:dkey-40n15.1 [Source:ZFIN;Acc:ZDB-GENE-110914-64]
ENSDARG00000091031	HAUS8	HAUS8	https://zfin.org/ZDB-GENE-030131-6830	si:ch211-153a8.4 [Source:ZFIN;Acc:ZDB-GENE-030131-6830]
ENSDARG00000070644	ttpal	ttpal	https://zfin.org/ZDB-GENE-030131-296	tocopherol (alpha) transfer protein-like [Source:ZFIN;Acc:ZDB-GENE-030131-296]
ENSDARG00000071906	sec24b	sec24b	https://zfin.org/ZDB-GENE-030131-6565	SEC24 homolog B, COPII coat complex component [Source:ZFIN;Acc:ZDB-GENE-030131-6565]
ENSDARG00000078767	yeats2	yeats2.1	https://zfin.org/ZDB-GENE-081104-292	YEATS domain containing 2 [Source:ZFIN;Acc:ZDB-GENE-081104-292]
ENSDARG00000007916	xpnpep3	xpnpep3	https://zfin.org/ZDB-GENE-040426-2076	X-prolyl aminopeptidase 3, mitochondrial [Source:ZFIN;Acc:ZDB-GENE-040426-2076]
ENSDARG00000079291	rapgef3	rapgef3	https://zfin.org/ZDB-GENE-090312-38	Rap guanine nucleotide exchange factor (GEF) 3 [Source:ZFIN;Acc:ZDB-GENE-090312-38]
ENSDARG00000020623	baxa	baxa.1	https://zfin.org/ZDB-GENE-000511-6	bcl2-associated X protein, a [Source:ZFIN;Acc:ZDB-GENE-000511-6]
ENSDARG00000057830	dnmt3bb.2	dnmt3bb.2	https://zfin.org/ZDB-GENE-990712-11	DNA (cytosine-5-)-methyltransferase 3 beta, duplicate b.2 [Source:ZFIN;Acc:ZDB-GENE-990712-11]
ENSDARG00000056924	sap130a	sap130a	https://zfin.org/ZDB-GENE-070615-5	Sin3A-associated protein a [Source:ZFIN;Acc:ZDB-GENE-070615-5]
ENSDARG00000105464	si:ch211-285c6.6	si:ch211-285c6.6	https://zfin.org/ZDB-GENE-160113-80	si:ch211-285c6.6 [Source:ZFIN;Acc:ZDB-GENE-160113-80]
ENSDARG00000104708	ddx24	ddx24	https://zfin.org/ZDB-GENE-100716-4	DEAD (Asp-Glu-Ala-Asp) box helicase 24 [Source:ZFIN;Acc:ZDB-GENE-100716-4]
ENSDARG00000105453	kcnk17	kcnk17	https://zfin.org/ZDB-GENE-120113-3	potassium channel, subfamily K, member 17 [Source:ZFIN;Acc:ZDB-GENE-120113-3]
ENSDARG00000057334	cmasa	cmasa	https://zfin.org/ZDB-GENE-050420-277	cytidine monophosphate N-acetylneuraminic acid synthetase a [Source:ZFIN;Acc:ZDB-GENE-050420-277]
ENSDARG00000101867	si:ch1073-416d2.4	si:ch1073-416d2.4	https://zfin.org/ZDB-GENE-131121-564	si:ch1073-416d2.4 [Source:ZFIN;Acc:ZDB-GENE-131121-564]
ENSDARG00000062248	ptpn21	ptpn21	https://zfin.org/ZDB-GENE-080102-4	protein tyrosine phosphatase, non-receptor type 21 [Source:ZFIN;Acc:ZDB-GENE-080102-4]
ENSDARG00000028748	tm9sf3	tm9sf3	https://zfin.org/ZDB-GENE-040426-2714	transmembrane 9 superfamily member 3 [Source:ZFIN;Acc:ZDB-GENE-040426-2714]
ENSDARG00000053240	kif6	kif6	https://zfin.org/ZDB-GENE-061027-130	kinesin family member 6 [Source:ZFIN;Acc:ZDB-GENE-061027-130]
ENSDARG00000038713	TEP1	TEP1	https://zfin.org/ZDB-GENE-070912-283	si:ch211-284o19.1 [Source:ZFIN;Acc:ZDB-GENE-070912-283]
ENSDARG00000074012	si:ch1073-159d7.7	si:ch1073-159d7.7	https://zfin.org/ZDB-GENE-160113-58	si:ch1073-159d7.7 [Source:ZFIN;Acc:ZDB-GENE-160113-58]
ENSDARG00000016368	zbtb8os	zbtb8os	https://zfin.org/ZDB-GENE-050417-176	zinc finger and BTB domain containing 8 opposite strand [Source:ZFIN;Acc:ZDB-GENE-050417-176]
ENSDARG00000026801	stau2	stau2	https://zfin.org/ZDB-GENE-040426-687	staufen double-stranded RNA binding protein 2 [Source:ZFIN;Acc:ZDB-GENE-040426-687]
ENSDARG00000075203	zgc:195212	zgc:195212	https://zfin.org/ZDB-GENE-081022-196	zgc:195212 [Source:ZFIN;Acc:ZDB-GENE-081022-196]
ENSDARG00000105393	HIST1H2BA	HIST1H2BA.4	https://zfin.org/ZDB-GENE-160113-114	si:ch1073-159d7.6 [Source:ZFIN;Acc:ZDB-GENE-160113-114]
ENSDARG00000105483	HIST1H2BA	HIST1H2BA.5	https://zfin.org/ZDB-GENE-160113-113	si:ch1073-159d7.5 [Source:ZFIN;Acc:ZDB-GENE-160113-113]
ENSDARG00000077143	znf526	znf526	https://zfin.org/ZDB-GENE-100922-260	zinc finger protein 526 [Source:ZFIN;Acc:ZDB-GENE-100922-260]
ENSDARG00000009136	tp53bp2a	tp53bp2a	https://zfin.org/ZDB-GENE-040516-8	tumor protein p53 binding protein, 2a [Source:ZFIN;Acc:ZDB-GENE-040516-8]
ENSDARG00000054250	crbn	crbn	https://zfin.org/ZDB-GENE-040822-43	cereblon [Source:ZFIN;Acc:ZDB-GENE-040822-43]
ENSDARG00000095562	si:ch73-138i16.1	si:ch73-138i16.1	https://zfin.org/ZDB-GENE-070705-208	si:ch73-138i16.1 [Source:ZFIN;Acc:ZDB-GENE-070705-208]
ENSDARG00000007175	recql	recql	https://zfin.org/ZDB-GENE-050809-134	RecQ helicase-like [Source:ZFIN;Acc:ZDB-GENE-050809-134]
ENSDARG00000105366	si:ch1073-159d7.10	si:ch1073-159d7.10	https://zfin.org/ZDB-GENE-160113-115	si:ch1073-159d7.10 [Source:ZFIN;Acc:ZDB-GENE-160113-115]
ENSDARG00000057863	dnmt3bb.3	dnmt3bb.3	https://zfin.org/ZDB-GENE-050314-2	DNA (cytosine-5-)-methyltransferase beta, duplicate b.3 [Source:ZFIN;Acc:ZDB-GENE-050314-2]
ENSDARG00000103025	hmgcs1	hmgcs1	https://zfin.org/ZDB-GENE-040426-1042	3-hydroxy-3-methylglutaryl-CoA synthase 1 (soluble) [Source:ZFIN;Acc:ZDB-GENE-040426-1042]
ENSDARG00000105350	si:ch1073-153i20.4	si:ch1073-153i20.4	https://zfin.org/ZDB-GENE-160113-41	si:ch1073-153i20.4 [Source:ZFIN;Acc:ZDB-GENE-160113-41]
ENSDARG00000105355	HIST1H4I	HIST1H4I	https://zfin.org/ZDB-GENE-160113-74	si:ch1073-159d7.1 [Source:ZFIN;Acc:ZDB-GENE-160113-74]
ENSDARG00000105409	si:ch1073-159d7.2	si:ch1073-159d7.2	https://zfin.org/ZDB-GENE-160113-89	si:ch1073-159d7.2 [Source:ZFIN;Acc:ZDB-GENE-160113-89]
ENSDARG00000063229	xpo1b	xpo1b	https://zfin.org/ZDB-GENE-070530-6	exportin 1 (CRM1 homolog, yeast) b [Source:ZFIN;Acc:ZDB-GENE-070530-6]
ENSDARG00000105340	si:ch1073-153i20.3	si:ch1073-153i20.3	https://zfin.org/ZDB-GENE-160113-111	si:ch1073-153i20.3 [Source:ZFIN;Acc:ZDB-GENE-160113-111]
ENSDARG00000037017	ube4b	ube4b	https://zfin.org/ZDB-GENE-020205-1	ubiquitination factor E4B, UFD2 homolog (S. cerevisiae) [Source:ZFIN;Acc:ZDB-GENE-020205-1]
ENSDARG00000061736	ank3a	ank3a	https://zfin.org/ZDB-GENE-060621-1	ankyrin 3a [Source:ZFIN;Acc:ZDB-GENE-060621-1]
ENSDARG00000105376	si:ch73-368j24.4	si:ch73-368j24.4	https://zfin.org/ZDB-GENE-160113-90	si:ch73-368j24.4 [Source:ZFIN;Acc:ZDB-GENE-160113-90]
ENSDARG00000104485	si:ch1073-224n8.1	si:ch1073-224n8.1	https://zfin.org/ZDB-GENE-030131-5649	si:ch1073-224n8.1 [Source:ZFIN;Acc:ZDB-GENE-030131-5649]
ENSDARG00000098595	HIST2H2AB	HIST2H2AB.4	https://zfin.org/ZDB-GENE-081205-1	zgc:195633 [Source:ZFIN;Acc:ZDB-GENE-081205-1]
ENSDARG00000090369	zgc:86896	zgc:86896	https://zfin.org/ZDB-GENE-040625-80	zgc:86896 [Source:ZFIN;Acc:ZDB-GENE-040625-80]
ENSDARG00000070127	nfxl1	nfxl1	https://zfin.org/ZDB-GENE-110411-178	nuclear transcription factor, X-box binding-like 1 [Source:ZFIN;Acc:ZDB-GENE-110411-178]
ENSDARG00000100024	HIST2H2AB	HIST2H2AB.5	https://zfin.org/ZDB-GENE-030131-6292	zgc:165551 [Source:ZFIN;Acc:ZDB-GENE-030131-6292]
ENSDARG00000100372	alad	alad	https://zfin.org/ZDB-GENE-050417-123	aminolevulinate dehydratase [Source:ZFIN;Acc:ZDB-GENE-050417-123]
ENSDARG00000069703	efhb	efhb	https://zfin.org/ZDB-GENE-091001-1	EF-hand domain family, member B [Source:ZFIN;Acc:ZDB-GENE-091001-1]
ENSDARG00000032056	arl6	arl6	https://zfin.org/ZDB-GENE-041219-2	ADP-ribosylation factor-like 6 [Source:ZFIN;Acc:ZDB-GENE-041219-2]
ENSDARG00000058479	zgc:110425	zgc:110425	https://zfin.org/ZDB-GENE-050522-103	zgc:110425 [Source:ZFIN;Acc:ZDB-GENE-050522-103]
ENSDARG00000061215	fam149b1	fam149b1	https://zfin.org/ZDB-GENE-070112-2102	family with sequence similarity 149, member B1 [Source:ZFIN;Acc:ZDB-GENE-070112-2102]
ENSDARG00000105502	si:ch73-368j24.12	si:ch73-368j24.12	https://zfin.org/ZDB-GENE-160113-38	si:ch73-368j24.12 [Source:ZFIN;Acc:ZDB-GENE-160113-38]
ENSDARG00000105478	si:ch1073-153i20.5	si:ch1073-153i20.5	https://zfin.org/ZDB-GENE-160113-104	si:ch1073-153i20.5 [Source:ZFIN;Acc:ZDB-GENE-160113-104]
ENSDARG00000091271	CENPT	CENPT	https://zfin.org/ZDB-GENE-030131-3256	si:ch211-225g23.1 [Source:ZFIN;Acc:ZDB-GENE-030131-3256]
ENSDARG00000095946	si:ch73-341k19.1	si:ch73-341k19.1	https://zfin.org/ZDB-GENE-110411-201	si:ch73-341k19.1 [Source:ZFIN;Acc:ZDB-GENE-110411-201]
ENSDARG00000036542	pknox1.2	pknox1.2	https://zfin.org/ZDB-GENE-020123-1	pbx/knotted 1 homeobox 1.2 [Source:ZFIN;Acc:ZDB-GENE-020123-1]
ENSDARG00000004306	klhl18	klhl18	https://zfin.org/ZDB-GENE-030131-5785	kelch-like family member 18 [Source:ZFIN;Acc:ZDB-GENE-030131-5785]
ENSDARG00000045910	tmem181	tmem181	https://zfin.org/ZDB-GENE-060503-309	transmembrane protein 181 [Source:ZFIN;Acc:ZDB-GENE-060503-309]
ENSDARG00000099695	si:dkey-61n16.5	si:dkey-61n16.5	https://zfin.org/ZDB-GENE-100922-235	si:dkey-61n16.5 [Source:ZFIN;Acc:ZDB-GENE-100922-235]
ENSDARG00000069397	zswim8	zswim8	https://zfin.org/ZDB-GENE-050320-59	zinc finger, SWIM-type containing 8 [Source:ZFIN;Acc:ZDB-GENE-050320-59]
ENSDARG00000039365	cuedc2	cuedc2	https://zfin.org/ZDB-GENE-030131-6283	CUE domain containing 2 [Source:ZFIN;Acc:ZDB-GENE-030131-6283]
ENSDARG00000090190	bcam	bcam	https://zfin.org/ZDB-GENE-060929-620	basal cell adhesion molecule (Lutheran blood group) [Source:ZFIN;Acc:ZDB-GENE-060929-620]
ENSDARG00000052537	cptp	cptp	https://zfin.org/ZDB-GENE-040801-240	ceramide-1-phosphate transfer protein [Source:ZFIN;Acc:ZDB-GENE-040801-240]
ENSDARG00000102153	nrp1a	nrp1a	https://zfin.org/ZDB-GENE-030519-2	neuropilin 1a [Source:ZFIN;Acc:ZDB-GENE-030519-2]
ENSDARG00000062304	pdpk1a	pdpk1a	https://zfin.org/ZDB-GENE-061013-109	3-phosphoinositide dependent protein kinase 1a [Source:ZFIN;Acc:ZDB-GENE-061013-109]
ENSDARG00000052535	ubxn10	ubxn10	https://zfin.org/ZDB-GENE-060825-319	UBX domain protein 10 [Source:ZFIN;Acc:ZDB-GENE-060825-319]
ENSDARG00000036427	slc3a2a	slc3a2a	https://zfin.org/ZDB-GENE-000831-3	solute carrier family 3 (amino acid transporter heavy chain), member 2a [Source:ZFIN;Acc:ZDB-GENE-000831-3]
ENSDARG00000045870	plekha5	plekha5	https://zfin.org/ZDB-GENE-041210-25	pleckstrin homology domain containing, family A member 5 [Source:ZFIN;Acc:ZDB-GENE-041210-25]
ENSDARG00000078856	slc22a23	slc22a23	https://zfin.org/ZDB-GENE-030131-3564	solute carrier family 22, member 23 [Source:ZFIN;Acc:ZDB-GENE-030131-3564]
ENSDARG00000053713	ccdc88c	ccdc88c	https://zfin.org/ZDB-GENE-100419-3	coiled-coil domain containing 88C [Source:ZFIN;Acc:ZDB-GENE-100419-3]
ENSDARG00000044982	dhrs3a	dhrs3a	https://zfin.org/ZDB-GENE-040801-217	dehydrogenase/reductase (SDR family) member 3a [Source:ZFIN;Acc:ZDB-GENE-040801-217]
ENSDARG00000002830	trmt2a	trmt2a	https://zfin.org/ZDB-GENE-030131-6876	tRNA methyltransferase 2 homolog A [Source:ZFIN;Acc:ZDB-GENE-030131-6876]
ENSDARG00000061994	acacb	acacb	https://zfin.org/ZDB-GENE-060526-132	acetyl-CoA carboxylase beta [Source:ZFIN;Acc:ZDB-GENE-060526-132]
ENSDARG00000079222	zgc:174315	zgc:174315	https://zfin.org/ZDB-GENE-080219-29	zgc:174315 [Source:ZFIN;Acc:ZDB-GENE-080219-29]
ENSDARG00000063167	chkb	chkb	https://zfin.org/ZDB-GENE-030131-2928	choline kinase beta [Source:ZFIN;Acc:ZDB-GENE-030131-2928]
ENSDARG00000006878	phf21aa	phf21aa	https://zfin.org/ZDB-GENE-050208-99	PHD finger protein 21Aa [Source:ZFIN;Acc:ZDB-GENE-050208-99]
ENSDARG00000074009	znf1059	znf1059	https://zfin.org/ZDB-GENE-030131-8437	zinc finger protein 1059 [Source:ZFIN;Acc:ZDB-GENE-030131-8437]
ENSDARG00000026505	si:ch211-285c6.3	si:ch211-285c6.3	https://zfin.org/ZDB-GENE-040724-148	si:ch211-285c6.3 [Source:ZFIN;Acc:ZDB-GENE-040724-148]
ENSDARG00000088214	si:dkey-23a23.3	si:dkey-23a23.3	https://zfin.org/ZDB-GENE-110913-89	si:dkey-23a23.3 [Source:ZFIN;Acc:ZDB-GENE-110913-89]
ENSDARG00000093054	si:ch211-207c6.5	si:ch211-207c6.5	https://zfin.org/ZDB-GENE-060526-92	si:ch211-207c6.5 [Source:ZFIN;Acc:ZDB-GENE-060526-92]
ENSDARG00000089318	si:dkey-69c19.1	si:dkey-69c19.1	https://zfin.org/ZDB-GENE-070424-247	si:dkey-69c19.1 [Source:ZFIN;Acc:ZDB-GENE-070424-247]
ENSDARG00000014550	rfx3	rfx3	https://zfin.org/ZDB-GENE-061103-253	regulatory factor X, 3 (influences HLA class II expression) [Source:ZFIN;Acc:ZDB-GENE-061103-253]
ENSDARG00000091619	mvb12ba	mvb12ba	https://zfin.org/ZDB-GENE-060929-372	multivesicular body subunit 12Ba [Source:ZFIN;Acc:ZDB-GENE-060929-372]
ENSDARG00000086471	pkig	pkig	https://zfin.org/ZDB-GENE-050302-97	protein kinase (cAMP-dependent, catalytic) inhibitor gamma [Source:ZFIN;Acc:ZDB-GENE-050302-97]
ENSDARG00000060596	prkaa1	prkaa1	https://zfin.org/ZDB-GENE-030325-1	protein kinase, AMP-activated, alpha 1 catalytic subunit [Source:ZFIN;Acc:ZDB-GENE-030325-1]
ENSDARG00000040123	zfpm2a	zfpm2a	https://zfin.org/ZDB-GENE-060130-4	zinc finger protein, FOG family member 2a [Source:ZFIN;Acc:ZDB-GENE-060130-4]
ENSDARG00000029230	pnp4b	pnp4b	https://zfin.org/ZDB-GENE-040426-1887	purine nucleoside phosphorylase 4b [Source:ZFIN;Acc:ZDB-GENE-040426-1887]
ENSDARG00000001447	mier1b	mier1b	https://zfin.org/ZDB-GENE-070705-170	mesoderm induction early response 1b, transcriptional regulator [Source:ZFIN;Acc:ZDB-GENE-070705-170]
ENSDARG00000026875	fam57ba	fam57ba	https://zfin.org/ZDB-GENE-030131-2046	family with sequence similarity 57, member Ba [Source:ZFIN;Acc:ZDB-GENE-030131-2046]
ENSDARG00000093289	ASPG	ASPG	https://zfin.org/ZDB-GENE-090313-360	si:dkey-9i23.14 [Source:ZFIN;Acc:ZDB-GENE-090313-360]
ENSDARG00000015563	LPIN3	LPIN3	https://zfin.org/ZDB-GENE-051120-171	zgc:123305 [Source:ZFIN;Acc:ZDB-GENE-051120-171]
ENSDARG00000058730	rdh10a	rdh10a	https://zfin.org/ZDB-GENE-070112-2242	retinol dehydrogenase 10a [Source:ZFIN;Acc:ZDB-GENE-070112-2242]
ENSDARG00000053463	poglut1	poglut1	https://zfin.org/ZDB-GENE-051120-24	protein O-glucosyltransferase 1 [Source:ZFIN;Acc:ZDB-GENE-051120-24]
ENSDARG00000040890	fdps	fdps	https://zfin.org/ZDB-GENE-050506-78	farnesyl diphosphate synthase (farnesyl pyrophosphate synthetase, dimethylallyltranstransferase, geranyltranstransferase) [Source:ZFIN;Acc:ZDB-GENE-050506-78]
ENSDARG00000091176	znf995	znf995	https://zfin.org/ZDB-GENE-080215-13	zinc finger protein 995 [Source:ZFIN;Acc:ZDB-GENE-080215-13]
ENSDARG00000076838	apom	apom	https://zfin.org/ZDB-GENE-010605-5	apolipoprotein M [Source:ZFIN;Acc:ZDB-GENE-010605-5]
ENSDARG00000053058	rps11	rps11	https://zfin.org/ZDB-GENE-040426-2701	ribosomal protein S11 [Source:ZFIN;Acc:ZDB-GENE-040426-2701]
ENSDARG00000104996	tmem203	tmem203	https://zfin.org/ZDB-GENE-040718-225	transmembrane protein 203 [Source:ZFIN;Acc:ZDB-GENE-040718-225]
ENSDARG00000061585	cyp4v7	cyp4v7	https://zfin.org/ZDB-GENE-061103-88	cytochrome P450, family 4, subfamily V, polypeptide 7 [Source:ZFIN;Acc:ZDB-GENE-061103-88]
ENSDARG00000004246	slit2	slit2	https://zfin.org/ZDB-GENE-010306-3	slit homolog 2 (Drosophila) [Source:ZFIN;Acc:ZDB-GENE-010306-3]
ENSDARG00000059044	epm2a	epm2a	https://zfin.org/ZDB-GENE-100922-143	epilepsy, progressive myoclonus type 2A, Lafora disease (laforin) [Source:ZFIN;Acc:ZDB-GENE-100922-143]
ENSDARG00000089853	ATP5J	ATP5J	https://zfin.org/ZDB-GENE-110914-188	si:dkey-22n8.3 [Source:ZFIN;Acc:ZDB-GENE-110914-188]
ENSDARG00000102068	shcbp1	shcbp1	https://zfin.org/ZDB-GENE-030131-5865	SHC SH2-domain binding protein 1 [Source:ZFIN;Acc:ZDB-GENE-030131-5865]
ENSDARG00000087564	nek11	nek11	https://zfin.org/ZDB-GENE-100922-73	NIMA-related kinase 11 [Source:ZFIN;Acc:ZDB-GENE-100922-73]
ENSDARG00000029292	zgc:55943	zgc:55943	https://zfin.org/ZDB-GENE-040426-2013	zgc:55943 [Source:ZFIN;Acc:ZDB-GENE-040426-2013]
ENSDARG00000094794	si:ch211-171b20.3	si:ch211-171b20.3	https://zfin.org/ZDB-GENE-091204-278	si:ch211-171b20.3 [Source:ZFIN;Acc:ZDB-GENE-091204-278]
ENSDARG00000079777	map6d1	map6d1	https://zfin.org/ZDB-GENE-081104-293	MAP6 domain containing 1 [Source:ZFIN;Acc:ZDB-GENE-081104-293]
ENSDARG00000006353	itga5	itga5	https://zfin.org/ZDB-GENE-031116-52	integrin, alpha 5 (fibronectin receptor, alpha polypeptide) [Source:ZFIN;Acc:ZDB-GENE-031116-52]
ENSDARG00000105206	hmgcrb	hmgcrb	https://zfin.org/ZDB-GENE-051108-1	3-hydroxy-3-methylglutaryl-CoA reductase b [Source:ZFIN;Acc:ZDB-GENE-051108-1]
ENSDARG00000030108	sec22ba	sec22ba	https://zfin.org/ZDB-GENE-010724-3	SEC22 homolog B, vesicle trafficking protein a [Source:ZFIN;Acc:ZDB-GENE-010724-3]
ENSDARG00000004726	trappc11	trappc11	https://zfin.org/ZDB-GENE-030131-1723	trafficking protein particle complex 11 [Source:ZFIN;Acc:ZDB-GENE-030131-1723]
ENSDARG00000069583	CNDP1	CNDP1	https://zfin.org/ZDB-GENE-050913-105	zgc:114181 [Source:ZFIN;Acc:ZDB-GENE-050913-105]
ENSDARG00000052856	khdrbs1a	khdrbs1a	https://zfin.org/ZDB-GENE-000210-25	KH domain containing, RNA binding, signal transduction associated 1a [Source:ZFIN;Acc:ZDB-GENE-000210-25]
ENSDARG00000058030	hspa14	hspa14	https://zfin.org/ZDB-GENE-041210-73	heat shock protein 14 [Source:ZFIN;Acc:ZDB-GENE-041210-73]
ENSDARG00000069280	tsen15	tsen15	https://zfin.org/ZDB-GENE-041008-211	TSEN15 tRNA splicing endonuclease subunit [Source:ZFIN;Acc:ZDB-GENE-041008-211]
ENSDARG00000103313	rhot1b	rhot1b	https://zfin.org/ZDB-GENE-061009-52	ras homolog family member T1 [Source:ZFIN;Acc:ZDB-GENE-061009-52]
ENSDARG00000056725	hmgb3a	hmgb3a	https://zfin.org/ZDB-GENE-050428-1	high mobility group box 3a [Source:ZFIN;Acc:ZDB-GENE-050428-1]
ENSDARG00000019484	zdhhc7	zdhhc7	https://zfin.org/ZDB-GENE-040718-346	zinc finger, DHHC-type containing 7 [Source:ZFIN;Acc:ZDB-GENE-040718-346]
ENSDARG00000003113	ada	ada	https://zfin.org/ZDB-GENE-040718-393	adenosine deaminase [Source:ZFIN;Acc:ZDB-GENE-040718-393]
ENSDARG00000036967	smox	smox	https://zfin.org/ZDB-GENE-031201-3	spermine oxidase [Source:ZFIN;Acc:ZDB-GENE-031201-3]
ENSDARG00000017354	epha2a	epha2a	https://zfin.org/ZDB-GENE-990415-63	eph receptor A2 a [Source:ZFIN;Acc:ZDB-GENE-990415-63]
ENSDARG00000002609	rnf145a	rnf145a	https://zfin.org/ZDB-GENE-111012-3	ring finger protein 145a [Source:ZFIN;Acc:ZDB-GENE-111012-3]
ENSDARG00000015681	gsk3ab	gsk3ab	https://zfin.org/ZDB-GENE-990714-3	glycogen synthase kinase 3 alpha b [Source:ZFIN;Acc:ZDB-GENE-990714-3]
ENSDARG00000076745	zgc:193811	zgc:193811	https://zfin.org/ZDB-GENE-081022-43	zgc:193811 [Source:ZFIN;Acc:ZDB-GENE-081022-43]
ENSDARG00000045594	si:dkey-14k9.2	si:dkey-14k9.2	https://zfin.org/ZDB-GENE-041210-130	si:dkey-14k9.2 [Source:ZFIN;Acc:ZDB-GENE-041210-130]
ENSDARG00000004851	hinfp	hinfp	https://zfin.org/ZDB-GENE-040426-2764	histone H4 transcription factor [Source:ZFIN;Acc:ZDB-GENE-040426-2764]
ENSDARG00000004880	acsm3	acsm3	https://zfin.org/ZDB-GENE-080220-22	acyl-CoA synthetase medium-chain family member 3 [Source:ZFIN;Acc:ZDB-GENE-080220-22]
ENSDARG00000027689	pold1	pold1	https://zfin.org/ZDB-GENE-060429-1	polymerase (DNA directed), delta 1, catalytic subunit [Source:ZFIN;Acc:ZDB-GENE-060429-1]
ENSDARG00000020301	os9	os9	https://zfin.org/ZDB-GENE-060929-32	osteosarcoma amplified 9, endoplasmic reticulum lectin [Source:ZFIN;Acc:ZDB-GENE-060929-32]
ENSDARG00000007425	apol1	apol1	https://zfin.org/ZDB-GENE-030131-3217	apolipoprotein L, 1 [Source:ZFIN;Acc:ZDB-GENE-030131-3217]
ENSDARG00000007657	ccnh	ccnh	https://zfin.org/ZDB-GENE-050320-13	cyclin H [Source:ZFIN;Acc:ZDB-GENE-050320-13]
ENSDARG00000054973	itsn2b	itsn2b	https://zfin.org/ZDB-GENE-050309-102	intersectin 2b [Source:ZFIN;Acc:ZDB-GENE-050309-102]
ENSDARG00000077530	ahctf1	ahctf1	https://zfin.org/ZDB-GENE-070521-2	AT hook containing transcription factor 1 [Source:ZFIN;Acc:ZDB-GENE-070521-2]
ENSDARG00000035535	rasa1a	rasa1a	https://zfin.org/ZDB-GENE-030131-4694	RAS p21 protein activator (GTPase activating protein) 1a [Source:ZFIN;Acc:ZDB-GENE-030131-4694]
ENSDARG00000017661	braf	braf	https://zfin.org/ZDB-GENE-040805-1	B-Raf proto-oncogene, serine/threonine kinase [Source:ZFIN;Acc:ZDB-GENE-040805-1]
ENSDARG00000096105	si:ch211-197e7.8	si:ch211-197e7.8	https://zfin.org/ZDB-GENE-110913-87	si:ch211-197e7.8 [Source:ZFIN;Acc:ZDB-GENE-110913-87]
ENSDARG00000007285	mrpl57	mrpl57	https://zfin.org/ZDB-GENE-040426-1745	mitochondrial ribosomal protein L57 [Source:ZFIN;Acc:ZDB-GENE-040426-1745]
ENSDARG00000002174	itfg2	itfg2	https://zfin.org/ZDB-GENE-041008-161	integrin alpha FG-GAP repeat containing 2 [Source:ZFIN;Acc:ZDB-GENE-041008-161]
ENSDARG00000098130	bola3	bola3	https://zfin.org/ZDB-GENE-040801-32	bolA family member 3 [Source:ZFIN;Acc:ZDB-GENE-040801-32]
ENSDARG00000102488	si:ch73-200d4.2	si:ch73-200d4.2	https://zfin.org/ZDB-GENE-141216-165	si:ch73-200d4.2 [Source:ZFIN;Acc:ZDB-GENE-141216-165]
ENSDARG00000057272	slc30a9	slc30a9	https://zfin.org/ZDB-GENE-040724-254	solute carrier family 30 (zinc transporter), member 9 [Source:ZFIN;Acc:ZDB-GENE-040724-254]
ENSDARG00000103187	syce2	syce2	https://zfin.org/ZDB-GENE-050512-1	synaptonemal complex central element protein 2 [Source:ZFIN;Acc:ZDB-GENE-050512-1]
ENSDARG00000031915	hif1an	hif1an	https://zfin.org/ZDB-GENE-030826-19	hypoxia inducible factor 1, alpha subunit inhibitor [Source:ZFIN;Acc:ZDB-GENE-030826-19]
ENSDARG00000055855	kcnc3a	kcnc3a	https://zfin.org/ZDB-GENE-100901-1	potassium voltage-gated channel, Shaw-related subfamily, member 3a [Source:ZFIN;Acc:ZDB-GENE-100901-1]
ENSDARG00000063663	clp1	clp1	https://zfin.org/ZDB-GENE-030131-5306	cleavage and polyadenylation factor I subunit 1 [Source:ZFIN;Acc:ZDB-GENE-030131-5306]
ENSDARG00000098831	gcdhb	gcdhb	https://zfin.org/ZDB-GENE-041010-117	glutaryl-CoA dehydrogenase b [Source:ZFIN;Acc:ZDB-GENE-041010-117]
ENSDARG00000056978	letm1	letm1	https://zfin.org/ZDB-GENE-050522-154	leucine zipper-EF-hand containing transmembrane protein 1 [Source:ZFIN;Acc:ZDB-GENE-050522-154]
ENSDARG00000061541	unc5db	unc5db	https://zfin.org/ZDB-GENE-060531-162	unc-5 netrin receptor Db [Source:ZFIN;Acc:ZDB-GENE-060531-162]
ENSDARG00000044056	ahi1	ahi1	https://zfin.org/ZDB-GENE-060803-1	Abelson helper integration site 1 [Source:ZFIN;Acc:ZDB-GENE-060803-1]
ENSDARG00000071868	znf711	znf711	https://zfin.org/ZDB-GENE-081107-49	zinc finger protein 711 [Source:ZFIN;Acc:ZDB-GENE-081107-49]
ENSDARG00000079412	ftr02	ftr02	https://zfin.org/ZDB-GENE-070424-5	finTRIM family, member 2 [Source:ZFIN;Acc:ZDB-GENE-070424-5]
ENSDARG00000101903	zfyve9a	zfyve9a	https://zfin.org/ZDB-GENE-070705-182	zinc finger, FYVE domain containing 9a [Source:ZFIN;Acc:ZDB-GENE-070705-182]
ENSDARG00000055893	nmnat1	nmnat1	https://zfin.org/ZDB-GENE-050417-101	nicotinamide nucleotide adenylyltransferase 1 [Source:ZFIN;Acc:ZDB-GENE-050417-101]
ENSDARG00000036036	mdka	mdka	https://zfin.org/ZDB-GENE-990621-1	midkine a [Source:ZFIN;Acc:ZDB-GENE-990621-1]
ENSDARG00000003203	rhcga	rhcga	https://zfin.org/ZDB-GENE-070424-81	Rh family, C glycoprotein a [Source:ZFIN;Acc:ZDB-GENE-070424-81]
ENSDARG00000087554	cdk1	cdk1	https://zfin.org/ZDB-GENE-010320-1	cyclin-dependent kinase 1 [Source:ZFIN;Acc:ZDB-GENE-010320-1]
ENSDARG00000038909	msl2a	msl2a	https://zfin.org/ZDB-GENE-070912-449	male-specific lethal 2 homolog a (Drosophila) [Source:ZFIN;Acc:ZDB-GENE-070912-449]
ENSDARG00000030602	rps19	rps19	https://zfin.org/ZDB-GENE-040426-1716	ribosomal protein S19 [Source:ZFIN;Acc:ZDB-GENE-040426-1716]
ENSDARG00000097237	si:dkey-11p23.13	si:dkey-11p23.13	https://zfin.org/ZDB-GENE-131127-441	si:dkey-11p23.13 [Source:ZFIN;Acc:ZDB-GENE-131127-441]
ENSDARG00000099631	cmtm6	cmtm6	https://zfin.org/ZDB-GENE-030729-15	CKLF-like MARVEL transmembrane domain containing 6 [Source:ZFIN;Acc:ZDB-GENE-030729-15]
ENSDARG00000101095	cpne4a	cpne4a	https://zfin.org/ZDB-GENE-060503-427	copine IVa [Source:ZFIN;Acc:ZDB-GENE-060503-427]
ENSDARG00000037109	pwp2h	pwp2h	https://zfin.org/ZDB-GENE-021031-3	PWP2 periodic tryptophan protein homolog (yeast) [Source:ZFIN;Acc:ZDB-GENE-021031-3]
ENSDARG00000026902	cryzl1	cryzl1	https://zfin.org/ZDB-GENE-040718-378	crystallin, zeta (quinone reductase)-like 1 [Source:ZFIN;Acc:ZDB-GENE-040718-378]
ENSDARG00000021973	st13	st13	https://zfin.org/ZDB-GENE-030131-5395	suppression of tumorigenicity 13 (colon carcinoma) (Hsp70 interacting protein) [Source:ZFIN;Acc:ZDB-GENE-030131-5395]
ENSDARG00000035565	atp6v0a2b	atp6v0a2b	https://zfin.org/ZDB-GENE-060526-4	ATPase, H+ transporting, lysosomal V0 subunit a2b [Source:ZFIN;Acc:ZDB-GENE-060526-4]
ENSDARG00000071271	SAC3D1	SAC3D1	https://zfin.org/ZDB-GENE-030131-4791	si:zfos-452g4.1 [Source:ZFIN;Acc:ZDB-GENE-030131-4791]
ENSDARG00000091640	si:ch73-352p4.5	si:ch73-352p4.5	https://zfin.org/ZDB-GENE-141219-42	si:ch73-352p4.5 [Source:ZFIN;Acc:ZDB-GENE-141219-42]
ENSDARG00000000086	itsn1	itsn1	https://zfin.org/ZDB-GENE-030616-226	intersectin 1 (SH3 domain protein) [Source:ZFIN;Acc:ZDB-GENE-030616-226]
ENSDARG00000091631	si:ch211-197h24.6	si:ch211-197h24.6	https://zfin.org/ZDB-GENE-030131-1361	si:ch211-197h24.6 [Source:ZFIN;Acc:ZDB-GENE-030131-1361]
ENSDARG00000030881	baxb	baxb	https://zfin.org/ZDB-GENE-050227-21	bcl2-associated X protein, b [Source:ZFIN;Acc:ZDB-GENE-050227-21]
ENSDARG00000007257	rab5ab	rab5ab	https://zfin.org/ZDB-GENE-040122-3	RAB5A, member RAS oncogene family, b [Source:ZFIN;Acc:ZDB-GENE-040122-3]
ENSDARG00000025577	zgc:66447	zgc:66447	https://zfin.org/ZDB-GENE-030131-4748	zgc:66447 [Source:ZFIN;Acc:ZDB-GENE-030131-4748]
ENSDARG00000011545	arrb2b	arrb2b	https://zfin.org/ZDB-GENE-040426-1332	arrestin, beta 2b [Source:ZFIN;Acc:ZDB-GENE-040426-1332]
ENSDARG00000053956	sptbn2	sptbn2	https://zfin.org/ZDB-GENE-030131-787	spectrin, beta, non-erythrocytic 2 [Source:ZFIN;Acc:ZDB-GENE-030131-787]
ENSDARG00000045598	si:dkey-180p18.9	si:dkey-180p18.9	https://zfin.org/ZDB-GENE-041210-132	si:dkey-180p18.9 [Source:ZFIN;Acc:ZDB-GENE-041210-132]
ENSDARG00000001470	mhc1zea	mhc1zea	https://zfin.org/ZDB-GENE-070705-176	major histocompatibility complex class I ZEA [Source:ZFIN;Acc:ZDB-GENE-070705-176]
ENSDARG00000059075	nip7	nip7	https://zfin.org/ZDB-GENE-050522-256	NIP7, nucleolar pre-rRNA processing protein [Source:ZFIN;Acc:ZDB-GENE-050522-256]
ENSDARG00000040158	cdc42l	cdc42l	https://zfin.org/ZDB-GENE-030131-6069	cell division cycle 42, like [Source:ZFIN;Acc:ZDB-GENE-030131-6069]
ENSDARG00000006215	akr1b1	akr1b1	https://zfin.org/ZDB-GENE-040625-7	aldo-keto reductase family 1, member B1 (aldose reductase) [Source:ZFIN;Acc:ZDB-GENE-040625-7]
ENSDARG00000058597	nt5c3a	nt5c3a	https://zfin.org/ZDB-GENE-030131-439	5'-nucleotidase, cytosolic IIIA [Source:ZFIN;Acc:ZDB-GENE-030131-439]
ENSDARG00000023703	kctd6b	kctd6b	https://zfin.org/ZDB-GENE-040718-14	potassium channel tetramerization domain containing 6b [Source:ZFIN;Acc:ZDB-GENE-040718-14]
ENSDARG00000040159	wnt4b	wnt4b	https://zfin.org/ZDB-GENE-000411-1	wingless-type MMTV integration site family, member 4b [Source:ZFIN;Acc:ZDB-GENE-000411-1]
ENSDARG00000036592	setd4	setd4	https://zfin.org/ZDB-GENE-050808-2	SET domain containing 4 [Source:ZFIN;Acc:ZDB-GENE-050808-2]
ENSDARG00000087074	znf574	znf574	https://zfin.org/ZDB-GENE-100922-259	zinc finger protein 574 [Source:ZFIN;Acc:ZDB-GENE-100922-259]
ENSDARG00000104181	si:dkey-152p16.6	si:dkey-152p16.6	https://zfin.org/ZDB-GENE-030131-8575	si:dkey-152p16.6 [Source:ZFIN;Acc:ZDB-GENE-030131-8575]
ENSDARG00000015449	fut8a	fut8a	https://zfin.org/ZDB-GENE-031118-20	fucosyltransferase 8a (alpha (1,6) fucosyltransferase) [Source:ZFIN;Acc:ZDB-GENE-031118-20]
ENSDARG00000057688	ical1	ical1	https://zfin.org/ZDB-GENE-030910-4	islet cell autoantigen 1-like [Source:ZFIN;Acc:ZDB-GENE-030910-4]
ENSDARG00000097033	si:ch73-341k19.4	si:ch73-341k19.4	https://zfin.org/ZDB-GENE-131121-354	si:ch73-341k19.4 [Source:ZFIN;Acc:ZDB-GENE-131121-354]
ENSDARG00000058593	sri	sri	https://zfin.org/ZDB-GENE-040426-1356	sorcin [Source:ZFIN;Acc:ZDB-GENE-040426-1356]
ENSDARG00000061207	ttc7b	ttc7b	https://zfin.org/ZDB-GENE-070105-3	tetratricopeptide repeat domain 7B [Source:ZFIN;Acc:ZDB-GENE-070105-3]
ENSDARG00000099849	ebf1a	ebf1a	https://zfin.org/ZDB-GENE-081028-51	early B-cell factor 1a [Source:ZFIN;Acc:ZDB-GENE-081028-51]
ENSDARG00000040657	wipi1	wipi1	https://zfin.org/ZDB-GENE-040426-1404	WD repeat domain, phosphoinositide interacting 1 [Source:ZFIN;Acc:ZDB-GENE-040426-1404]
ENSDARG00000012593	col5a1	col5a1	https://zfin.org/ZDB-GENE-041105-6	procollagen, type V, alpha 1 [Source:ZFIN;Acc:ZDB-GENE-041105-6]
ENSDARG00000026767	nol11	nol11	https://zfin.org/ZDB-GENE-030131-419	nucleolar protein 11 [Source:ZFIN;Acc:ZDB-GENE-030131-419]
ENSDARG00000002267	dcaf13	dcaf13	https://zfin.org/ZDB-GENE-040426-703	ddb1 and cul4 associated factor 13 [Source:ZFIN;Acc:ZDB-GENE-040426-703]
ENSDARG00000075559	ppm1g	ppm1g	https://zfin.org/ZDB-GENE-030425-4	protein phosphatase, Mg2+/Mn2+ dependent, 1G [Source:ZFIN;Acc:ZDB-GENE-030425-4]
ENSDARG00000088136	pcdh2aa15	pcdh2aa15	https://zfin.org/ZDB-GENE-041118-15	protocadherin 2 alpha a 15 [Source:ZFIN;Acc:ZDB-GENE-041118-15]
ENSDARG00000103867	si:dkey-209n16.3	si:dkey-209n16.3	https://zfin.org/ZDB-GENE-141216-454	si:dkey-209n16.3 [Source:ZFIN;Acc:ZDB-GENE-141216-454]
ENSDARG00000019063	fat1b	fat1b	https://zfin.org/ZDB-GENE-130530-563	FAT atypical cadherin 1b [Source:ZFIN;Acc:ZDB-GENE-130530-563]
ENSDARG00000101606	rims2a	rims2a	https://zfin.org/ZDB-GENE-040426-1656	regulating synaptic membrane exocytosis 2a [Source:ZFIN;Acc:ZDB-GENE-040426-1656]
ENSDARG00000019549	cds1	cds1	https://zfin.org/ZDB-GENE-070705-78	CDP-diacylglycerol synthase (phosphatidate cytidylyltransferase) 1 [Source:ZFIN;Acc:ZDB-GENE-070705-78]
ENSDARG00000095914	si:dkey-209n16.2	si:dkey-209n16.2	https://zfin.org/ZDB-GENE-110408-44	si:dkey-209n16.2 [Source:ZFIN;Acc:ZDB-GENE-110408-44]
ENSDARG00000006011	klhl42	klhl42	https://zfin.org/ZDB-GENE-041210-190	kelch-like family, member 42 [Source:ZFIN;Acc:ZDB-GENE-041210-190]
ENSDARG00000101449	grik5	grik5	https://zfin.org/ZDB-GENE-070821-6	glutamate receptor, ionotropic, kainate 5 [Source:ZFIN;Acc:ZDB-GENE-070821-6]
ENSDARG00000102223	si:ch211-57g18.3	si:ch211-57g18.3	https://zfin.org/ZDB-GENE-131127-86	si:ch211-57g18.3 [Source:ZFIN;Acc:ZDB-GENE-131127-86]
ENSDARG00000037935	aldh16a1	aldh16a1	https://zfin.org/ZDB-GENE-070112-2062	aldehyde dehydrogenase 16 family, member A1 [Source:ZFIN;Acc:ZDB-GENE-070112-2062]
ENSDARG00000010738	zgc:101716	zgc:101716	https://zfin.org/ZDB-GENE-041114-135	zgc:101716 [Source:ZFIN;Acc:ZDB-GENE-041114-135]
ENSDARG00000070801	opa1	opa1	https://zfin.org/ZDB-GENE-041114-7	optic atrophy 1 (autosomal dominant) [Source:ZFIN;Acc:ZDB-GENE-041114-7]
ENSDARG00000086269	ndst2a	ndst2a	https://zfin.org/ZDB-GENE-060810-182	N-deacetylase/N-sulfotransferase (heparan glucosaminyl) 2a [Source:ZFIN;Acc:ZDB-GENE-060810-182]
ENSDARG00000052859	chp1	chp1	https://zfin.org/ZDB-GENE-030131-4086	calcineurin-like EF-hand protein 1 [Source:ZFIN;Acc:ZDB-GENE-030131-4086]
ENSDARG00000027938	rad18	rad18	https://zfin.org/ZDB-GENE-040426-745	RAD18 E3 ubiquitin protein ligase [Source:ZFIN;Acc:ZDB-GENE-040426-745]
ENSDARG00000021866	upk1a	upk1a	https://zfin.org/ZDB-GENE-060421-2603	uroplakin 1a [Source:ZFIN;Acc:ZDB-GENE-060421-2603]
ENSDARG00000101300	ssna1	ssna1	https://zfin.org/ZDB-GENE-081104-255	Sjogren syndrome nuclear autoantigen 1 [Source:ZFIN;Acc:ZDB-GENE-081104-255]
ENSDARG00000055874	cpe	cpe	https://zfin.org/ZDB-GENE-090313-68	carboxypeptidase E [Source:ZFIN;Acc:ZDB-GENE-090313-68]
ENSDARG00000028367	sult2st3	sult2st3	https://zfin.org/ZDB-GENE-061117-4	sulfotransferase family 2, cytosolic sulfotransferase 3 [Source:ZFIN;Acc:ZDB-GENE-061117-4]
ENSDARG00000023645	ccbl1	ccbl1	https://zfin.org/ZDB-GENE-040426-2676	cysteine conjugate-beta lyase, cytoplasmic [Source:ZFIN;Acc:ZDB-GENE-040426-2676]
ENSDARG00000087417	zdhhc5b	zdhhc5b	https://zfin.org/ZDB-GENE-101117-1	zinc finger, DHHC-type containing 5b [Source:ZFIN;Acc:ZDB-GENE-101117-1]
ENSDARG00000058710	terf1	terf1	https://zfin.org/ZDB-GENE-090612-2	telomeric repeat binding factor (NIMA-interacting) 1 [Source:ZFIN;Acc:ZDB-GENE-090612-2]
ENSDARG00000030703	otx1a	otx1a	https://zfin.org/ZDB-GENE-980526-27	orthodenticle homeobox 1a [Source:ZFIN;Acc:ZDB-GENE-980526-27]
ENSDARG00000079543	dpys	dpys	https://zfin.org/ZDB-GENE-070508-1	dihydropyrimidinase [Source:ZFIN;Acc:ZDB-GENE-070508-1]
ENSDARG00000055360	llph	llph	https://zfin.org/ZDB-GENE-051030-30	LLP homolog, long-term synaptic facilitation (Aplysia) [Source:ZFIN;Acc:ZDB-GENE-051030-30]
ENSDARG00000058088	aifm1	aifm1	https://zfin.org/ZDB-GENE-030826-11	apoptosis-inducing factor, mitochondrion-associated 1 [Source:ZFIN;Acc:ZDB-GENE-030826-11]
ENSDARG00000018902	pes	pes	https://zfin.org/ZDB-GENE-990415-206	pescadillo [Source:ZFIN;Acc:ZDB-GENE-990415-206]
ENSDARG00000015863	socs6b	socs6b	https://zfin.org/ZDB-GENE-030131-1670	suppressor of cytokine signaling 6b [Source:ZFIN;Acc:ZDB-GENE-030131-1670]
ENSDARG00000075714	si:dkey-27p23.3	si:dkey-27p23.3	https://zfin.org/ZDB-GENE-070705-453	si:dkey-27p23.3 [Source:ZFIN;Acc:ZDB-GENE-070705-453]
ENSDARG00000039910	rbm42	rbm42	https://zfin.org/ZDB-GENE-040809-2	RNA binding motif protein 42 [Source:ZFIN;Acc:ZDB-GENE-040809-2]
ENSDARG00000103430	si:ch73-226i7.1	si:ch73-226i7.1	https://zfin.org/ZDB-GENE-141219-19	si:ch73-226i7.1 [Source:ZFIN;Acc:ZDB-GENE-141219-19]
ENSDARG00000101277	znf207b	znf207b	https://zfin.org/ZDB-GENE-030131-7377	zinc finger protein 207, b [Source:ZFIN;Acc:ZDB-GENE-030131-7377]
ENSDARG00000011333	arhgap33	arhgap33	https://zfin.org/ZDB-GENE-121105-12	Rho GTPase activating protein 33 [Source:ZFIN;Acc:ZDB-GENE-121105-12]
ENSDARG00000095783	si:dkey-249d8.1	si:dkey-249d8.1	https://zfin.org/ZDB-GENE-110411-157	si:dkey-249d8.1 [Source:ZFIN;Acc:ZDB-GENE-110411-157]
ENSDARG00000005179	c17h14orf159	c17h14orf159	https://zfin.org/ZDB-GENE-070725-6	c17h14orf159 homolog (H. sapiens) [Source:ZFIN;Acc:ZDB-GENE-070725-6]
ENSDARG00000037874	cyp3c2	cyp3c2	https://zfin.org/ZDB-GENE-081103-62	cytochrome P450, family 3, subfamily c, polypeptide 2 [Source:ZFIN;Acc:ZDB-GENE-081103-62]
ENSDARG00000100174	si:ch73-226i7.2	si:ch73-226i7.2	https://zfin.org/ZDB-GENE-141219-37	si:ch73-226i7.2 [Source:ZFIN;Acc:ZDB-GENE-141219-37]
ENSDARG00000041951	selo	selo	https://zfin.org/ZDB-GENE-030131-4485	selenoprotein O [Source:ZFIN;Acc:ZDB-GENE-030131-4485]
ENSDARG00000005058	ncapd2	ncapd2	https://zfin.org/ZDB-GENE-050506-59	non-SMC condensin I complex, subunit D2 [Source:ZFIN;Acc:ZDB-GENE-050506-59]
ENSDARG00000036442	atp11c	atp11c	https://zfin.org/ZDB-GENE-030616-51	ATPase, Class VI, type 11C [Source:ZFIN;Acc:ZDB-GENE-030616-51]
ENSDARG00000073858	pex26	pex26	https://zfin.org/ZDB-GENE-030131-6584	peroxisomal biogenesis factor 26 [Source:ZFIN;Acc:ZDB-GENE-030131-6584]
ENSDARG00000037873	cyp3c3	cyp3c3	https://zfin.org/ZDB-GENE-041114-102	cytochrome P450, family 3, subfamily c, polypeptide 3 [Source:ZFIN;Acc:ZDB-GENE-041114-102]
ENSDARG00000055899	lzic	lzic	https://zfin.org/ZDB-GENE-040718-342	leucine zipper and CTNNBIP1 domain containing [Source:ZFIN;Acc:ZDB-GENE-040718-342]
ENSDARG00000033259	dis3l2	dis3l2	https://zfin.org/ZDB-GENE-070705-171	DIS3 like 3'-5' exoribonuclease 2 [Source:ZFIN;Acc:ZDB-GENE-070705-171]
ENSDARG00000043781	PSMB10	PSMB10	https://zfin.org/ZDB-GENE-040718-278	zgc:92791 [Source:ZFIN;Acc:ZDB-GENE-040718-278]
ENSDARG00000076544	aldh5a1	aldh5a1	https://zfin.org/ZDB-GENE-070228-2	aldehyde dehydrogenase 5 family, member A1 (succinate-semialdehyde dehydrogenase) [Source:ZFIN;Acc:ZDB-GENE-070228-2]
ENSDARG00000001898	manea	manea	https://zfin.org/ZDB-GENE-040912-87	mannosidase, endo-alpha [Source:ZFIN;Acc:ZDB-GENE-040912-87]
ENSDARG00000031776	zgc:92066	zgc:92066	https://zfin.org/ZDB-GENE-040718-72	zgc:92066 [Source:ZFIN;Acc:ZDB-GENE-040718-72]
ENSDARG00000101651	si:zfos-1056e6.1	si:zfos-1056e6.1	https://zfin.org/ZDB-GENE-141216-389	si:zfos-1056e6.1 [Source:ZFIN;Acc:ZDB-GENE-141216-389]
ENSDARG00000037506	prps1b	prps1b	https://zfin.org/ZDB-GENE-030131-4011	phosphoribosyl pyrophosphate synthetase 1B [Source:ZFIN;Acc:ZDB-GENE-030131-4011]
ENSDARG00000055192	zgc:136930	zgc:136930	https://zfin.org/ZDB-GENE-060312-16	zgc:136930 [Source:ZFIN;Acc:ZDB-GENE-060312-16]
ENSDARG00000002798	cog8	cog8	https://zfin.org/ZDB-GENE-050320-74	component of oligomeric golgi complex 8 [Source:ZFIN;Acc:ZDB-GENE-050320-74]
ENSDARG00000053542	kctd12.2	kctd12.2	https://zfin.org/ZDB-GENE-060117-4	potassium channel tetramerisation domain containing 12.2 [Source:ZFIN;Acc:ZDB-GENE-060117-4]
ENSDARG00000012729	hcls1	hcls1	https://zfin.org/ZDB-GENE-030131-7191	hematopoietic cell-specific Lyn substrate 1 [Source:ZFIN;Acc:ZDB-GENE-030131-7191]
ENSDARG00000039959	gdnfa	gdnfa	https://zfin.org/ZDB-GENE-010226-1	glial cell derived neurotrophic factor a [Source:ZFIN;Acc:ZDB-GENE-010226-1]
ENSDARG00000037140	pfkfb1	pfkfb1	https://zfin.org/ZDB-GENE-030131-5664	6-phosphofructo-2-kinase/fructose-2,6-biphosphatase 1 [Source:ZFIN;Acc:ZDB-GENE-030131-5664]
ENSDARG00000075898	spata7	spata7	https://zfin.org/ZDB-GENE-050419-61	spermatogenesis associated 7 [Source:ZFIN;Acc:ZDB-GENE-050419-61]
ENSDARG00000017986	vps13d	vps13d	https://zfin.org/ZDB-GENE-050912-1	vacuolar protein sorting 13 homolog D (S. cerevisiae) [Source:ZFIN;Acc:ZDB-GENE-050912-1]
ENSDARG00000105279	si:ch211-108c17.2	si:ch211-108c17.2	https://zfin.org/ZDB-GENE-131118-13	si:ch211-108c17.2 [Source:ZFIN;Acc:ZDB-GENE-131118-13]
ENSDARG00000076541	clec3ba	clec3ba	https://zfin.org/ZDB-GENE-110411-71	C-type lectin domain family 3, member Ba [Source:ZFIN;Acc:ZDB-GENE-110411-71]
ENSDARG00000105142	tcirg1b	tcirg1b	https://zfin.org/ZDB-GENE-040426-2022	T-cell, immune regulator 1, ATPase, H+ transporting, lysosomal V0 subunit A3b [Source:ZFIN;Acc:ZDB-GENE-040426-2022]
ENSDARG00000100803	zgc:113443	zgc:113443	https://zfin.org/ZDB-GENE-071004-104	zgc:113443 [Source:ZFIN;Acc:ZDB-GENE-050913-134]
ENSDARG00000097615	si:ch211-108d22.2	si:ch211-108d22.2	https://zfin.org/ZDB-GENE-131127-97	si:ch211-108d22.2 [Source:ZFIN;Acc:ZDB-GENE-131127-97]
ENSDARG00000068187	spg7	spg7	https://zfin.org/ZDB-GENE-030131-5391	spastic paraplegia 7 [Source:ZFIN;Acc:ZDB-GENE-030131-5391]
ENSDARG00000092617	si:dkey-22h13.2	si:dkey-22h13.2	https://zfin.org/ZDB-GENE-120703-42	si:dkey-22h13.2 [Source:ZFIN;Acc:ZDB-GENE-120703-42]
ENSDARG00000101756	im:7141269	im:7141269	https://zfin.org/ZDB-GENE-041111-134	im:7141269 [Source:ZFIN;Acc:ZDB-GENE-041111-134]
ENSDARG00000103530	zgc:113102	zgc:113102	https://zfin.org/ZDB-GENE-050306-35	zgc:113102 [Source:ZFIN;Acc:ZDB-GENE-050306-35]
ENSDARG00000098923	zgc:173577	zgc:173577	https://zfin.org/ZDB-GENE-071004-55	zgc:173577 [Source:ZFIN;Acc:ZDB-GENE-071004-55]
ENSDARG00000075676	fndc7b	fndc7b	https://zfin.org/ZDB-GENE-100922-114	fibronectin type III domain containing 7b [Source:ZFIN;Acc:ZDB-GENE-100922-114]
ENSDARG00000069463	alox12	alox12	https://zfin.org/ZDB-GENE-030131-1452	arachidonate 12-lipoxygenase [Source:ZFIN;Acc:ZDB-GENE-030131-1452]
ENSDARG00000025535	clint1a	clint1a	https://zfin.org/ZDB-GENE-030131-2590	clathrin interactor 1a [Source:ZFIN;Acc:ZDB-GENE-030131-2590]
ENSDARG00000077722	ppp2r3a	ppp2r3a	https://zfin.org/ZDB-GENE-070912-646	protein phosphatase 2, regulatory subunit B'', alpha [Source:ZFIN;Acc:ZDB-GENE-070912-646]
ENSDARG00000017757	pik3cg	pik3cg	https://zfin.org/ZDB-GENE-040426-2532	phosphatidylinositol-4,5-bisphosphate 3-kinase, catalytic subunit gamma [Source:ZFIN;Acc:ZDB-GENE-040426-2532]
ENSDARG00000103929	ildr1a	ildr1a	https://zfin.org/ZDB-GENE-040426-1412	immunoglobulin-like domain containing receptor 1a [Source:ZFIN;Acc:ZDB-GENE-040426-1412]
ENSDARG00000038030	rbx1	rbx1	https://zfin.org/ZDB-GENE-041008-106	ring-box 1, E3 ubiquitin protein ligase [Source:ZFIN;Acc:ZDB-GENE-041008-106]
ENSDARG00000060153	h6pd	h6pd	https://zfin.org/ZDB-GENE-110408-60	hexose-6-phosphate dehydrogenase (glucose 1-dehydrogenase) [Source:ZFIN;Acc:ZDB-GENE-110408-60]
ENSDARG00000033099	kif7	kif7	https://zfin.org/ZDB-GENE-050307-1	kinesin family member 7 [Source:ZFIN;Acc:ZDB-GENE-050307-1]
ENSDARG00000086838	itga2.3	itga2.3	https://zfin.org/ZDB-GENE-091204-176	integrin, alpha 2 (CD49B, alpha 2 subunit of VLA-2 receptor), tandem duplicate 3 [Source:ZFIN;Acc:ZDB-GENE-091204-176]
ENSDARG00000091996	si:ch211-117m20.5	si:ch211-117m20.5	https://zfin.org/ZDB-GENE-030131-12	si:ch211-117m20.5 [Source:ZFIN;Acc:ZDB-GENE-030131-12]
ENSDARG00000053222	asb5b	asb5b	https://zfin.org/ZDB-GENE-050417-271	ankyrin repeat and SOCS box containing 5b [Source:ZFIN;Acc:ZDB-GENE-050417-271]
ENSDARG00000093112	espnlb	espnlb	https://zfin.org/ZDB-GENE-070912-481	espin-like b [Source:ZFIN;Acc:ZDB-GENE-070912-481]
ENSDARG00000097086	si:dkey-172k15.4	si:dkey-172k15.4	https://zfin.org/ZDB-GENE-131127-210	si:dkey-172k15.4 [Source:ZFIN;Acc:ZDB-GENE-131127-210]
ENSDARG00000016080	nob1	nob1	https://zfin.org/ZDB-GENE-030131-3112	NIN1/RPN12 binding protein 1 homolog (S. cerevisiae) [Source:ZFIN;Acc:ZDB-GENE-030131-3112]
ENSDARG00000033967	trmt2b	trmt2b	https://zfin.org/ZDB-GENE-050809-101	tRNA methyltransferase 2 homolog B [Source:ZFIN;Acc:ZDB-GENE-050809-101]
ENSDARG00000088817	wdr59	wdr59	https://zfin.org/ZDB-GENE-120215-187	WD repeat domain 59 [Source:ZFIN;Acc:ZDB-GENE-120215-187]
ENSDARG00000078904	brd4	brd4	https://zfin.org/ZDB-GENE-030131-267	bromodomain containing 4 [Source:ZFIN;Acc:ZDB-GENE-030131-267]
ENSDARG00000022309	dspa	dspa	https://zfin.org/ZDB-GENE-030131-2743	desmoplakin a [Source:ZFIN;Acc:ZDB-GENE-030131-2743]
ENSDARG00000078474	myo15ab	myo15ab	https://zfin.org/ZDB-GENE-090312-149	myosin XVAb [Source:ZFIN;Acc:ZDB-GENE-090312-149]
ENSDARG00000097689	si:ch211-79k12.3	si:ch211-79k12.3	https://zfin.org/ZDB-GENE-030131-3332	si:ch211-79k12.3 [Source:ZFIN;Acc:ZDB-GENE-030131-3332]
ENSDARG00000020015	mrps33	mrps33	https://zfin.org/ZDB-GENE-040715-6	mitochondrial ribosomal protein S33 [Source:ZFIN;Acc:ZDB-GENE-040715-6]
ENSDARG00000017422	apmap	apmap	https://zfin.org/ZDB-GENE-020919-1	adipocyte plasma membrane associated protein [Source:ZFIN;Acc:ZDB-GENE-020919-1]
ENSDARG00000040291	cadm4	cadm4	https://zfin.org/ZDB-GENE-041114-138	cell adhesion molecule 4 [Source:ZFIN;Acc:ZDB-GENE-041114-138]
ENSDARG00000097215	si:dkey-172k15.7	si:dkey-172k15.7	https://zfin.org/ZDB-GENE-131127-550	si:dkey-172k15.7 [Source:ZFIN;Acc:ZDB-GENE-131127-550]
ENSDARG00000069461	rnaseka	rnaseka	https://zfin.org/ZDB-GENE-060825-301	ribonuclease, RNase K a [Source:ZFIN;Acc:ZDB-GENE-060825-301]
ENSDARG00000063003	alkbh5	alkbh5	https://zfin.org/ZDB-GENE-061013-602	alkB homolog 5, RNA demethylase [Source:ZFIN;Acc:ZDB-GENE-061013-602]
ENSDARG00000102240	si:ch1073-210e22.1	si:ch1073-210e22.1	https://zfin.org/ZDB-GENE-131120-178	si:ch1073-210e22.1 [Source:ZFIN;Acc:ZDB-GENE-131120-178]
ENSDARG00000097099	si:ch211-108d22.1	si:ch211-108d22.1	https://zfin.org/ZDB-GENE-131126-61	si:ch211-108d22.1 [Source:ZFIN;Acc:ZDB-GENE-131126-61]
ENSDARG00000045705	meig1	meig1	https://zfin.org/ZDB-GENE-050320-33	meiosis/spermiogenesis associated 1 [Source:ZFIN;Acc:ZDB-GENE-050320-33]
ENSDARG00000055876	msmo1	msmo1	https://zfin.org/ZDB-GENE-040426-2670	methylsterol monooxygenase 1 [Source:ZFIN;Acc:ZDB-GENE-040426-2670]
ENSDARG00000019230	rpl7a	rpl7a	https://zfin.org/ZDB-GENE-031001-9	ribosomal protein L7a [Source:ZFIN;Acc:ZDB-GENE-031001-9]
ENSDARG00000033179	tmem243b	tmem243b	https://zfin.org/ZDB-GENE-040426-2205	transmembrane protein 243, mitochondrial b [Source:ZFIN;Acc:ZDB-GENE-040426-2205]
ENSDARG00000078890	wdfy3	wdfy3	https://zfin.org/ZDB-GENE-070705-153	WD repeat and FYVE domain containing 3 [Source:ZFIN;Acc:ZDB-GENE-070705-153]
ENSDARG00000045909	dynlt1	dynlt1	https://zfin.org/ZDB-GENE-041210-9	dynein, light chain, Tctex-type 1 [Source:ZFIN;Acc:ZDB-GENE-041210-9]
ENSDARG00000086256	si:ch211-236p5.2	si:ch211-236p5.2	https://zfin.org/ZDB-GENE-081028-33	si:ch211-236p5.2 [Source:ZFIN;Acc:ZDB-GENE-081028-33]
ENSDARG00000021097	nelfcd	nelfcd	https://zfin.org/ZDB-GENE-040426-720	negative elongation factor complex member C/D [Source:ZFIN;Acc:ZDB-GENE-040426-720]
ENSDARG00000092776	si:ch73-209l12.1	si:ch73-209l12.1	https://zfin.org/ZDB-GENE-091204-92	si:ch73-209l12.1 [Source:ZFIN;Acc:ZDB-GENE-091204-92]
ENSDARG00000074726	nrde2	nrde2	https://zfin.org/ZDB-GENE-111117-3	NRDE-2, necessary for RNA interference, domain containing [Source:ZFIN;Acc:ZDB-GENE-111117-3]
ENSDARG00000035427	surf6	surf6	https://zfin.org/ZDB-GENE-040426-1333	surfeit 6 [Source:ZFIN;Acc:ZDB-GENE-040426-1333]
ENSDARG00000088078	usp18	usp18	https://zfin.org/ZDB-GENE-100210-2	ubiquitin specific peptidase 18 [Source:ZFIN;Acc:ZDB-GENE-100210-2]
ENSDARG00000058943	cdcp1a	cdcp1a	https://zfin.org/ZDB-GENE-050327-55	CUB domain containing protein 1a [Source:ZFIN;Acc:ZDB-GENE-050327-55]
ENSDARG00000015161	zgc:92664	zgc:92664	https://zfin.org/ZDB-GENE-040718-119	zgc:92664 [Source:ZFIN;Acc:ZDB-GENE-040718-119]
ENSDARG00000014148	med22	med22	https://zfin.org/ZDB-GENE-040625-156	mediator complex subunit 22 [Source:ZFIN;Acc:ZDB-GENE-040625-156]
ENSDARG00000045704	dclre1c	dclre1c	https://zfin.org/ZDB-GENE-041210-72	DNA cross-link repair 1C, PSO2 homolog (S. cerevisiae) [Source:ZFIN;Acc:ZDB-GENE-041210-72]
ENSDARG00000021811	calm1a	calm1a	https://zfin.org/ZDB-GENE-030131-8308	calmodulin 1a [Source:ZFIN;Acc:ZDB-GENE-030131-8308]
ENSDARG00000003592	surf1	surf1	https://zfin.org/ZDB-GENE-041108-2	surfeit 1 [Source:ZFIN;Acc:ZDB-GENE-041108-2]
ENSDARG00000043081	ctsz	ctsz	https://zfin.org/ZDB-GENE-041010-139	cathepsin Z [Source:ZFIN;Acc:ZDB-GENE-041010-139]
ENSDARG00000076981	zgc:198329	zgc:198329	https://zfin.org/ZDB-GENE-080226-6	zgc:198329 [Source:ZFIN;Acc:ZDB-GENE-080226-6]
ENSDARG00000058953	abcc4	abcc4	https://zfin.org/ZDB-GENE-030616-511	ATP-binding cassette, sub-family C (CFTR/MRP), member 4 [Source:ZFIN;Acc:ZDB-GENE-030616-511]
ENSDARG00000094000	si:dkey-153k10.6	si:dkey-153k10.6	https://zfin.org/ZDB-GENE-041210-76	si:dkey-153k10.6 [Source:ZFIN;Acc:ZDB-GENE-041210-76]
ENSDARG00000021787	abcb5	abcb5	https://zfin.org/ZDB-GENE-030131-6414	ATP-binding cassette, sub-family B (MDR/TAP), member 5 [Source:ZFIN;Acc:ZDB-GENE-030131-6414]
ENSDARG00000089262	pbx3a	pbx3a	https://zfin.org/ZDB-GENE-031218-1	pre-B-cell leukemia homeobox 3a [Source:ZFIN;Acc:ZDB-GENE-031218-1]
ENSDARG00000033451	fam173b	fam173b	https://zfin.org/ZDB-GENE-041114-90	family with sequence similarity 173, member B [Source:ZFIN;Acc:ZDB-GENE-041114-90]
ENSDARG00000034670	ube2e2	ube2e2	https://zfin.org/ZDB-GENE-040801-237	ubiquitin-conjugating enzyme E2E 2 [Source:ZFIN;Acc:ZDB-GENE-040801-237]
ENSDARG00000079011	col17a1b	col17a1b	https://zfin.org/ZDB-GENE-030131-7145	collagen, type XVII, alpha 1b [Source:ZFIN;Acc:ZDB-GENE-030131-7145]
ENSDARG00000074248	tmem237b	tmem237b	https://zfin.org/ZDB-GENE-040912-63	transmembrane protein 237b [Source:ZFIN;Acc:ZDB-GENE-040912-63]
ENSDARG00000039363	dnajb12a	dnajb12a	https://zfin.org/ZDB-GENE-030131-2725	DnaJ (Hsp40) homolog, subfamily B, member 12a [Source:ZFIN;Acc:ZDB-GENE-030131-2725]
ENSDARG00000010032	cmtm7	cmtm7	https://zfin.org/ZDB-GENE-041111-174	CKLF-like MARVEL transmembrane domain containing 7 [Source:ZFIN;Acc:ZDB-GENE-041111-174]
ENSDARG00000013561	pgm1	pgm1	https://zfin.org/ZDB-GENE-040426-1245	phosphoglucomutase 1 [Source:ZFIN;Acc:ZDB-GENE-040426-1245]
ENSDARG00000043770	si:dkey-192d15.2	si:dkey-192d15.2	https://zfin.org/ZDB-GENE-040724-74	si:dkey-192d15.2 [Source:ZFIN;Acc:ZDB-GENE-040724-74]
ENSDARG00000018698	carm1	carm1	https://zfin.org/ZDB-GENE-040724-77	coactivator-associated arginine methyltransferase 1 [Source:ZFIN;Acc:ZDB-GENE-040724-77]
ENSDARG00000104888	si:dkey-28i19.1	si:dkey-28i19.1	https://zfin.org/ZDB-GENE-110914-21	si:dkey-28i19.1 [Source:ZFIN;Acc:ZDB-GENE-110914-21]
ENSDARG00000006747	tmem178b	tmem178b	https://zfin.org/ZDB-GENE-040718-92	transmembrane protein 178B [Source:ZFIN;Acc:ZDB-GENE-040718-92]
ENSDARG00000088711	lgals1l1	lgals1l1	https://zfin.org/ZDB-GENE-030131-4905	lectin, galactoside-binding, soluble, 1 (galectin 1)-like 1 [Source:ZFIN;Acc:ZDB-GENE-030131-4905]
ENSDARG00000016875	gys1	gys1	https://zfin.org/ZDB-GENE-040426-1243	glycogen synthase 1 (muscle) [Source:ZFIN;Acc:ZDB-GENE-040426-1243]
ENSDARG00000058818	rbm38	rbm38	https://zfin.org/ZDB-GENE-030131-5923	RNA binding motif protein 38 [Source:ZFIN;Acc:ZDB-GENE-030131-5923]
ENSDARG00000034616	mlf2	mlf2	https://zfin.org/ZDB-GENE-050913-67	myeloid leukemia factor 2 [Source:ZFIN;Acc:ZDB-GENE-050913-67]
ENSDARG00000054942	lgals2a	lgals2a	https://zfin.org/ZDB-GENE-050318-2	lectin, galactoside-binding, soluble, 2a [Source:ZFIN;Acc:ZDB-GENE-050318-2]
ENSDARG00000015538	znf207a	znf207a	https://zfin.org/ZDB-GENE-040426-2273	zinc finger protein 207, a [Source:ZFIN;Acc:ZDB-GENE-040426-2273]
ENSDARG00000097127	si:dkey-172k15.3	si:dkey-172k15.3	https://zfin.org/ZDB-GENE-131121-97	si:dkey-172k15.3 [Source:ZFIN;Acc:ZDB-GENE-131121-97]
ENSDARG00000025073	rpl18a	rpl18a	https://zfin.org/ZDB-GENE-040426-1071	ribosomal protein L18a [Source:ZFIN;Acc:ZDB-GENE-040426-1071]
ENSDARG00000031836	vps37c	vps37c	https://zfin.org/ZDB-GENE-061110-126	vacuolar protein sorting 37 homolog C (S. cerevisiae) [Source:ZFIN;Acc:ZDB-GENE-061110-126]
ENSDARG00000021399	yipf2	yipf2	https://zfin.org/ZDB-GENE-040724-124	Yip1 domain family, member 2 [Source:ZFIN;Acc:ZDB-GENE-040724-124]
ENSDARG00000098224	tmem56b	tmem56b	https://zfin.org/ZDB-GENE-041010-90	transmembrane protein 56b [Source:ZFIN;Acc:ZDB-GENE-041010-90]
ENSDARG00000002128	cwf19l1	cwf19l1	https://zfin.org/ZDB-GENE-031204-5	CWF19-like 1, cell cycle control [Source:ZFIN;Acc:ZDB-GENE-031204-5]
ENSDARG00000079353	si:ch211-165d12.4	si:ch211-165d12.4	https://zfin.org/ZDB-GENE-080303-7	si:ch211-165d12.4 [Source:ZFIN;Acc:ZDB-GENE-080303-7]
ENSDARG00000031796	ache	ache	https://zfin.org/ZDB-GENE-010906-1	acetylcholinesterase [Source:ZFIN;Acc:ZDB-GENE-010906-1]
ENSDARG00000018461	FTL	FTL	https://zfin.org/ZDB-GENE-040426-1948	zgc:56095 [Source:ZFIN;Acc:ZDB-GENE-040426-1948]
ENSDARG00000010445	trabd	trabd	https://zfin.org/ZDB-GENE-030131-1301	TraB domain containing [Source:ZFIN;Acc:ZDB-GENE-030131-1301]
ENSDARG00000052826	runx3	runx3	https://zfin.org/ZDB-GENE-000605-2	runt-related transcription factor 3 [Source:ZFIN;Acc:ZDB-GENE-000605-2]
ENSDARG00000075129	mrps11	mrps11	https://zfin.org/ZDB-GENE-040724-84	mitochondrial ribosomal protein S11 [Source:ZFIN;Acc:ZDB-GENE-040724-84]
ENSDARG00000094210	zgc:109934	zgc:109934	https://zfin.org/ZDB-GENE-080722-16	zgc:109934 [Source:ZFIN;Acc:ZDB-GENE-050522-428]
ENSDARG00000057633	cxcr4a	cxcr4a	https://zfin.org/ZDB-GENE-020102-1	chemokine (C-X-C motif) receptor 4a [Source:ZFIN;Acc:ZDB-GENE-020102-1]
ENSDARG00000020679	clpp	clpp	https://zfin.org/ZDB-GENE-030131-7860	caseinolytic mitochondrial matrix peptidase proteolytic subunit [Source:ZFIN;Acc:ZDB-GENE-030131-7860]
ENSDARG00000031343	rab6bb	rab6bb	https://zfin.org/ZDB-GENE-050320-28	RAB6B, member RAS oncogene family b [Source:ZFIN;Acc:ZDB-GENE-050320-28]
ENSDARG00000094695	si:dkey-204f11.64	si:dkey-204f11.64	https://zfin.org/ZDB-GENE-030131-8332	si:dkey-204f11.64 [Source:ZFIN;Acc:ZDB-GENE-030131-8332]
ENSDARG00000097937	si:dkey-172k15.5	si:dkey-172k15.5	https://zfin.org/ZDB-GENE-131127-219	si:dkey-172k15.5 [Source:ZFIN;Acc:ZDB-GENE-131127-219]
ENSDARG00000020235	sept9a	sept9a	https://zfin.org/ZDB-GENE-030131-9187	septin 9a [Source:ZFIN;Acc:ZDB-GENE-030131-9187]
ENSDARG00000086418	si:ch211-236p5.3	si:ch211-236p5.3	https://zfin.org/ZDB-GENE-081028-31	si:ch211-236p5.3 [Source:ZFIN;Acc:ZDB-GENE-081028-31]
ENSDARG00000054537	nhsl1a	nhsl1a	https://zfin.org/ZDB-GENE-050411-25	NHS-like 1a [Source:ZFIN;Acc:ZDB-GENE-050411-25]
ENSDARG00000067992	si:dkey-31e10.5	si:dkey-31e10.5	https://zfin.org/ZDB-GENE-121214-76	si:dkey-31e10.5 [Source:ZFIN;Acc:ZDB-GENE-121214-76]
ENSDARG00000058693	cast	cast	https://zfin.org/ZDB-GENE-050810-2	calpastatin [Source:ZFIN;Acc:ZDB-GENE-050810-2]
ENSDARG00000098017	pet100	pet100	https://zfin.org/ZDB-GENE-131121-608	PET100 homolog [Source:ZFIN;Acc:ZDB-GENE-131121-608]
ENSDARG00000003035	hspa9	hspa9	https://zfin.org/ZDB-GENE-030828-12	heat shock protein 9 [Source:ZFIN;Acc:ZDB-GENE-030828-12]
ENSDARG00000056206	camk2g2	camk2g2	https://zfin.org/ZDB-GENE-070323-2	calcium/calmodulin-dependent protein kinase (CaM kinase) II gamma 2 [Source:ZFIN;Acc:ZDB-GENE-070323-2]
ENSDARG00000003820	nr1d2a	nr1d2a	https://zfin.org/ZDB-GENE-040504-1	nuclear receptor subfamily 1, group D, member 2a [Source:ZFIN;Acc:ZDB-GENE-040504-1]
ENSDARG00000103545	tctex1d1	tctex1d1	https://zfin.org/ZDB-GENE-040912-49	Tctex1 domain containing 1 [Source:ZFIN;Acc:ZDB-GENE-040912-49]
ENSDARG00000030598	nampta	nampta	https://zfin.org/ZDB-GENE-110420-1	nicotinamide phosphoribosyltransferase a [Source:ZFIN;Acc:ZDB-GENE-110420-1]
ENSDARG00000055889	zgc:153215	zgc:153215	https://zfin.org/ZDB-GENE-061103-58	zgc:153215 [Source:ZFIN;Acc:ZDB-GENE-061103-58]
ENSDARG00000061951	golgb1	golgb1	https://zfin.org/ZDB-GENE-030429-9	golgin B1 [Source:ZFIN;Acc:ZDB-GENE-030429-9]
ENSDARG00000059370	nr1d4b	nr1d4b	https://zfin.org/ZDB-GENE-080403-6	nuclear receptor subfamily 1, group D, member 4b [Source:ZFIN;Acc:ZDB-GENE-080403-6]
ENSDARG00000076752	tmem67	tmem67	https://zfin.org/ZDB-GENE-080716-1	transmembrane protein 67 [Source:ZFIN;Acc:ZDB-GENE-080716-1]
ENSDARG00000102372	col4a3bpb	col4a3bpb	https://zfin.org/ZDB-GENE-110125-5	collagen, type IV, alpha 3 (Goodpasture antigen) binding protein b [Source:ZFIN;Acc:ZDB-GENE-110125-5]
ENSDARG00000013839	aldh3b1	aldh3b1	https://zfin.org/ZDB-GENE-021120-3	aldehyde dehydrogenase 3 family, member B1 [Source:ZFIN;Acc:ZDB-GENE-021120-3]
ENSDARG00000004392	hdr	hdr	https://zfin.org/ZDB-GENE-030826-5	hematopoietic death receptor [Source:ZFIN;Acc:ZDB-GENE-030826-5]
ENSDARG00000037909	zgc:110046	zgc:110046	https://zfin.org/ZDB-GENE-050522-380	zgc:110046 [Source:ZFIN;Acc:ZDB-GENE-050522-380]
ENSDARG00000008142	stxbp3	stxbp3	https://zfin.org/ZDB-GENE-040426-2833	syntaxin binding protein 3 [Source:ZFIN;Acc:ZDB-GENE-040426-2833]
ENSDARG00000099560	lyrm5a	lyrm5a	https://zfin.org/ZDB-GENE-050522-203	LYR motif containing 5a [Source:ZFIN;Acc:ZDB-GENE-050522-203]
ENSDARG00000076847	tnrc6c1	tnrc6c1	https://zfin.org/ZDB-GENE-030131-7440	trinucleotide repeat containing 6C1 [Source:ZFIN;Acc:ZDB-GENE-030131-7440]
ENSDARG00000034222	hs1bp3	hs1bp3	https://zfin.org/ZDB-GENE-131121-391	HCLS1 binding protein 3 [Source:ZFIN;Acc:ZDB-GENE-131121-391]
ENSDARG00000062711	gal3st1a	gal3st1a	https://zfin.org/ZDB-GENE-060526-375	galactose-3-O-sulfotransferase 1a [Source:ZFIN;Acc:ZDB-GENE-060526-375]
ENSDARG00000075826	msh4	msh4	https://zfin.org/ZDB-GENE-131121-643	mutS homolog 4 [Source:ZFIN;Acc:ZDB-GENE-131121-643]
ENSDARG00000105434	GRXCR1	GRXCR1	https://zfin.org/ZDB-GENE-160113-42	si:dkey-109l4.6 [Source:ZFIN;Acc:ZDB-GENE-160113-42]
ENSDARG00000031720	clstn1	clstn1	https://zfin.org/ZDB-GENE-040426-1064	calsyntenin 1 [Source:ZFIN;Acc:ZDB-GENE-040426-1064]
ENSDARG00000094514	si:dkey-7l6.3	si:dkey-7l6.3	https://zfin.org/ZDB-GENE-070912-586	si:dkey-7l6.3 [Source:ZFIN;Acc:ZDB-GENE-070912-586]
ENSDARG00000053959	cdc42ep2	cdc42ep2	https://zfin.org/ZDB-GENE-050320-104	CDC42 effector protein (Rho GTPase binding) 2 [Source:ZFIN;Acc:ZDB-GENE-050320-104]
ENSDARG00000104773	junbb	junbb	https://zfin.org/ZDB-GENE-040426-2666	jun B proto-oncogene b [Source:ZFIN;Acc:ZDB-GENE-040426-2666]
ENSDARG00000017772	mdh1aa	mdh1aa	https://zfin.org/ZDB-GENE-040204-1	malate dehydrogenase 1Aa, NAD (soluble) [Source:ZFIN;Acc:ZDB-GENE-040204-1]
ENSDARG00000041237	med18	med18	https://zfin.org/ZDB-GENE-040426-1276	mediator of RNA polymerase II transcription, subunit 18 homolog (yeast) [Source:ZFIN;Acc:ZDB-GENE-040426-1276]
ENSDARG00000074933	polg2	polg2	https://zfin.org/ZDB-GENE-060810-116	polymerase (DNA directed), gamma 2, accessory subunit [Source:ZFIN;Acc:ZDB-GENE-060810-116]
ENSDARG00000008784	prpf4ba	prpf4ba	https://zfin.org/ZDB-GENE-040426-947	pre-mRNA processing factor 4Ba [Source:ZFIN;Acc:ZDB-GENE-040426-947]
ENSDARG00000068175	ing5b	ing5b	https://zfin.org/ZDB-GENE-030616-462	inhibitor of growth family, member 5b [Source:ZFIN;Acc:ZDB-GENE-030616-462]
ENSDARG00000012823	dlgap4b	dlgap4b	https://zfin.org/ZDB-GENE-101215-2	discs, large (Drosophila) homolog-associated protein 4b [Source:ZFIN;Acc:ZDB-GENE-101215-2]
ENSDARG00000092542	si:dkey-40h17.5	si:dkey-40h17.5	https://zfin.org/ZDB-GENE-090312-6	si:dkey-40h17.5 [Source:ZFIN;Acc:ZDB-GENE-090312-6]
ENSDARG00000031664	sox21a	sox21a	https://zfin.org/ZDB-GENE-990715-6	SRY (sex determining region Y)-box 21a [Source:ZFIN;Acc:ZDB-GENE-990715-6]
ENSDARG00000096684	si:dkeyp-122d12.1	si:dkeyp-122d12.1	https://zfin.org/ZDB-GENE-131126-80	si:dkeyp-122d12.1 [Source:ZFIN;Acc:ZDB-GENE-131126-80]
ENSDARG00000031108	lrba	lrba	https://zfin.org/ZDB-GENE-090311-19	LPS-responsive vesicle trafficking, beach and anchor containing [Source:ZFIN;Acc:ZDB-GENE-090311-19]
ENSDARG00000004782	fgfr3	fgfr3	https://zfin.org/ZDB-GENE-000816-1	fibroblast growth factor receptor 3 [Source:ZFIN;Acc:ZDB-GENE-000816-1]
ENSDARG00000075972	csrnp2	csrnp2	https://zfin.org/ZDB-GENE-090312-137	cysteine-serine-rich nuclear protein 2 [Source:ZFIN;Acc:ZDB-GENE-090312-137]
ENSDARG00000100015	si:ch211-248k15.2	si:ch211-248k15.2	https://zfin.org/ZDB-GENE-070705-142	si:ch211-248k15.2 [Source:ZFIN;Acc:ZDB-GENE-070705-142]
ENSDARG00000093687	si:dkey-193c22.1	si:dkey-193c22.1	https://zfin.org/ZDB-GENE-030131-7957	si:dkey-193c22.1 [Source:ZFIN;Acc:ZDB-GENE-030131-7957]
ENSDARG00000095840	si:ch211-163f10.4	si:ch211-163f10.4	https://zfin.org/ZDB-GENE-061207-10	si:ch211-163f10.4 [Source:ZFIN;Acc:ZDB-GENE-061207-10]
ENSDARG00000006566	nlk1	nlk1	https://zfin.org/ZDB-GENE-040701-1	nemo-like kinase, type 1 [Source:ZFIN;Acc:ZDB-GENE-040701-1]
ENSDARG00000022303	higd1a	higd1a	https://zfin.org/ZDB-GENE-030826-15	HIG1 hypoxia inducible domain family, member 1A [Source:ZFIN;Acc:ZDB-GENE-030826-15]
ENSDARG00000058203	smc1al	smc1al	https://zfin.org/ZDB-GENE-040426-57	structural maintenance of chromosomes 1A, like [Source:ZFIN;Acc:ZDB-GENE-040426-57]
ENSDARG00000036235	zbtb3	zbtb3	https://zfin.org/ZDB-GENE-050506-105	zinc finger and BTB domain containing 3 [Source:ZFIN;Acc:ZDB-GENE-050506-105]
ENSDARG00000063187	agpat5	agpat5	https://zfin.org/ZDB-GENE-060929-914	1-acylglycerol-3-phosphate O-acyltransferase 5 (lysophosphatidic acid acyltransferase, epsilon) [Source:ZFIN;Acc:ZDB-GENE-060929-914]
ENSDARG00000076054	znf1140	znf1140	https://zfin.org/ZDB-GENE-080218-12	zinc finger protein 1140 [Source:ZFIN;Acc:ZDB-GENE-080218-12]
ENSDARG00000090854	lsm11	lsm11	https://zfin.org/ZDB-GENE-050309-124	LSM11, U7 small nuclear RNA associated [Source:ZFIN;Acc:ZDB-GENE-050309-124]
ENSDARG00000037097	slc7a2	slc7a2	https://zfin.org/ZDB-GENE-041212-5	solute carrier family 7 (cationic amino acid transporter, y+ system), member 2 [Source:ZFIN;Acc:ZDB-GENE-041212-5]
ENSDARG00000060246	slc16a6b	slc16a6b	https://zfin.org/ZDB-GENE-110208-3	solute carrier family 16, member 6b [Source:ZFIN;Acc:ZDB-GENE-110208-3]
ENSDARG00000001777	nup155	nup155	https://zfin.org/ZDB-GENE-040426-711	nucleoporin 155 [Source:ZFIN;Acc:ZDB-GENE-040426-711]
ENSDARG00000078179	fndc3ba	fndc3ba	https://zfin.org/ZDB-GENE-070510-1	fibronectin type III domain containing 3Ba [Source:ZFIN;Acc:ZDB-GENE-070510-1]
ENSDARG00000091777	mapkap1	mapkap1	https://zfin.org/ZDB-GENE-041111-178	mitogen-activated protein kinase associated protein 1 [Source:ZFIN;Acc:ZDB-GENE-041111-178]
ENSDARG00000056803	ap1s1	ap1s1	https://zfin.org/ZDB-GENE-040426-1119	adaptor-related protein complex 1, sigma 1 subunit [Source:ZFIN;Acc:ZDB-GENE-040426-1119]
ENSDARG00000095432	si:rp71-26b20.1	si:rp71-26b20.1	https://zfin.org/ZDB-GENE-091116-47	si:rp71-26b20.1 [Source:ZFIN;Acc:ZDB-GENE-091116-47]
ENSDARG00000053496	gemin8	gemin8	https://zfin.org/ZDB-GENE-041114-189	gem (nuclear organelle) associated protein 8 [Source:ZFIN;Acc:ZDB-GENE-041114-189]
ENSDARG00000104223	lmbrd1	lmbrd1	https://zfin.org/ZDB-GENE-041212-36	LMBR1 domain containing 1 [Source:ZFIN;Acc:ZDB-GENE-041212-36]
ENSDARG00000000324	dcaf8	dcaf8	https://zfin.org/ZDB-GENE-070912-578	DDB1 and CUL4 associated factor 8 [Source:ZFIN;Acc:ZDB-GENE-070912-578]
ENSDARG00000016307	mrpl46	mrpl46	https://zfin.org/ZDB-GENE-040718-224	mitochondrial ribosomal protein L46 [Source:ZFIN;Acc:ZDB-GENE-040718-224]
ENSDARG00000104982	si:ch211-248k15.5	si:ch211-248k15.5	https://zfin.org/ZDB-GENE-141216-105	si:ch211-248k15.5 [Source:ZFIN;Acc:ZDB-GENE-141216-105]
ENSDARG00000037091	asah1a	asah1a	https://zfin.org/ZDB-GENE-041010-191	N-acylsphingosine amidohydrolase (acid ceramidase) 1a [Source:ZFIN;Acc:ZDB-GENE-041010-191]
ENSDARG00000037924	gna13b	gna13b	https://zfin.org/ZDB-GENE-030131-8277	guanine nucleotide binding protein (G protein), alpha 13b [Source:ZFIN;Acc:ZDB-GENE-030131-8277]
ENSDARG00000099658	si:ch211-248k15.3	si:ch211-248k15.3	https://zfin.org/ZDB-GENE-070705-143	si:ch211-248k15.3 [Source:ZFIN;Acc:ZDB-GENE-070705-143]
ENSDARG00000056381	cfap97	cfap97	https://zfin.org/ZDB-GENE-030131-9405	cilia and flagella associated protein 97 [Source:ZFIN;Acc:ZDB-GENE-030131-9405]
ENSDARG00000036569	bach2a	bach2a	https://zfin.org/ZDB-GENE-120525-2	BTB and CNC homology 1, basic leucine zipper transcription factor 2a [Source:ZFIN;Acc:ZDB-GENE-120525-2]
ENSDARG00000003693	hars	hars	https://zfin.org/ZDB-GENE-040912-152	histidyl-tRNA synthetase [Source:ZFIN;Acc:ZDB-GENE-040912-152]
ENSDARG00000070131	rpp25l	rpp25l	https://zfin.org/ZDB-GENE-040718-275	ribonuclease P/MRP 25 subunit-like [Source:ZFIN;Acc:ZDB-GENE-040718-275]
ENSDARG00000030972	dnaja1	dnaja1	https://zfin.org/ZDB-GENE-030131-2642	DnaJ (Hsp40) homolog, subfamily A, member 1 [Source:ZFIN;Acc:ZDB-GENE-030131-2642]
ENSDARG00000007639	cnot4b	cnot4b	https://zfin.org/ZDB-GENE-040426-1164	CCR4-NOT transcription complex, subunit 4b [Source:ZFIN;Acc:ZDB-GENE-040426-1164]
ENSDARG00000100223	GPA33	GPA33	https://zfin.org/ZDB-GENE-080229-4	si:zfos-1011f11.1 [Source:ZFIN;Acc:ZDB-GENE-080229-4]
ENSDARG00000088082	si:ch211-214c20.1	si:ch211-214c20.1	https://zfin.org/ZDB-GENE-081103-49	si:ch211-214c20.1 [Source:ZFIN;Acc:ZDB-GENE-081103-49]
ENSDARG00000071562	mtus1a	mtus1a	https://zfin.org/ZDB-GENE-061103-409	microtubule associated tumor suppressor 1a [Source:ZFIN;Acc:ZDB-GENE-061103-409]
ENSDARG00000006040	cyp20a1	cyp20a1	https://zfin.org/ZDB-GENE-040426-2646	cytochrome P450, family 20, subfamily A, polypeptide 1 [Source:ZFIN;Acc:ZDB-GENE-040426-2646]
ENSDARG00000045567	phpt1	phpt1	https://zfin.org/ZDB-GENE-040801-85	phosphohistidine phosphatase 1 [Source:ZFIN;Acc:ZDB-GENE-040801-85]
ENSDARG00000035958	tnni2b.1	tnni2b.1	https://zfin.org/ZDB-GENE-050417-49	troponin I type 2b (skeletal, fast), tandem duplicate 1 [Source:ZFIN;Acc:ZDB-GENE-050417-49]
ENSDARG00000091381	si:dkey-191j3.2	si:dkey-191j3.2	https://zfin.org/ZDB-GENE-081103-55	si:dkey-191j3.2 [Source:ZFIN;Acc:ZDB-GENE-081103-55]
ENSDARG00000045565	noc4l	noc4l	https://zfin.org/ZDB-GENE-050522-98	nucleolar complex associated 4 homolog [Source:ZFIN;Acc:ZDB-GENE-050522-98]
ENSDARG00000093489	znf1119	znf1119	https://zfin.org/ZDB-GENE-110914-42	zinc finger protein 1119 [Source:ZFIN;Acc:ZDB-GENE-110914-42]
ENSDARG00000055989	tmem161b	tmem161b	https://zfin.org/ZDB-GENE-040426-2693	transmembrane protein 161B [Source:ZFIN;Acc:ZDB-GENE-040426-2693]
ENSDARG00000074393	sh3yl1	sh3yl1	https://zfin.org/ZDB-GENE-040128-16	SH3 and SYLF domain containing 1 [Source:ZFIN;Acc:ZDB-GENE-040128-16]
ENSDARG00000088616	si:ch211-197e7.3	si:ch211-197e7.3	https://zfin.org/ZDB-GENE-131122-50	si:ch211-197e7.3 [Source:ZFIN;Acc:ZDB-GENE-131122-50]
ENSDARG00000090532	znf974	znf974	https://zfin.org/ZDB-GENE-131119-54	zinc finger protein 974 [Source:ZFIN;Acc:ZDB-GENE-131119-54]
ENSDARG00000103628	si:ch1073-80i24.1	si:ch1073-80i24.1	https://zfin.org/ZDB-GENE-131121-169	si:ch1073-80i24.1 [Source:ZFIN;Acc:ZDB-GENE-131121-169]
ENSDARG00000079175	si:ch211-79k12.1	si:ch211-79k12.1	https://zfin.org/ZDB-GENE-080303-9	si:ch211-79k12.1 [Source:ZFIN;Acc:ZDB-GENE-080303-9]
ENSDARG00000091222	SLC22A14	SLC22A14	https://zfin.org/ZDB-GENE-030131-9103	si:dkey-190l8.2 [Source:ZFIN;Acc:ZDB-GENE-030131-9103]
ENSDARG00000075393	spock2	spock2	https://zfin.org/ZDB-GENE-090312-170	sparc/osteonectin, cwcv and kazal-like domains proteoglycan (testican) 2 [Source:ZFIN;Acc:ZDB-GENE-090312-170]
ENSDARG00000068177	pak2a	pak2a	https://zfin.org/ZDB-GENE-021011-2	p21 protein (Cdc42/Rac)-activated kinase 2a [Source:ZFIN;Acc:ZDB-GENE-021011-2]
ENSDARG00000099453	elof1	elof1	https://zfin.org/ZDB-GENE-040426-1385	ELF1 homolog, elongation factor 1 [Source:ZFIN;Acc:ZDB-GENE-040426-1385]
ENSDARG00000025581	rpl10	rpl10	https://zfin.org/ZDB-GENE-030131-8656	ribosomal protein L10 [Source:ZFIN;Acc:ZDB-GENE-030131-8656]
ENSDARG00000067950	zcchc2	zcchc2	https://zfin.org/ZDB-GENE-070912-269	zinc finger, CCHC domain containing 2 [Source:ZFIN;Acc:ZDB-GENE-070912-269]
ENSDARG00000094202	si:dkeyp-72g6.2	si:dkeyp-72g6.2	https://zfin.org/ZDB-GENE-090312-41	si:dkeyp-72g6.2 [Source:ZFIN;Acc:ZDB-GENE-090312-41]
ENSDARG00000009208	prkcda	prkcda	https://zfin.org/ZDB-GENE-030131-6503	protein kinase C, delta a [Source:ZFIN;Acc:ZDB-GENE-030131-6503]
ENSDARG00000037679	MPC2	MPC2	https://zfin.org/ZDB-GENE-040912-107	zgc:103678 [Source:ZFIN;Acc:ZDB-GENE-040912-107]
ENSDARG00000011841	atp5l	atp5l	https://zfin.org/ZDB-GENE-030131-5177	ATP synthase, H+ transporting, mitochondrial F0 complex, subunit g [Source:ZFIN;Acc:ZDB-GENE-030131-5177]
ENSDARG00000014053	olfm1b	olfm1b	https://zfin.org/ZDB-GENE-040801-228	olfactomedin 1b [Source:ZFIN;Acc:ZDB-GENE-040801-228]
ENSDARG00000070231	polh	polh	https://zfin.org/ZDB-GENE-060421-4949	polymerase (DNA directed), eta [Source:ZFIN;Acc:ZDB-GENE-060421-4949]
ENSDARG00000099235	hook2	hook2	https://zfin.org/ZDB-GENE-040426-1636	hook microtubule-tethering protein 2 [Source:ZFIN;Acc:ZDB-GENE-040426-1636]
ENSDARG00000020822	ift22	ift22	https://zfin.org/ZDB-GENE-050417-439	intraflagellar transport 22 homolog (Chlamydomonas) [Source:ZFIN;Acc:ZDB-GENE-050417-439]
ENSDARG00000103624	si:ch73-226i7.5	si:ch73-226i7.5	https://zfin.org/ZDB-GENE-141222-72	si:ch73-226i7.5 [Source:ZFIN;Acc:ZDB-GENE-141222-72]
ENSDARG00000016858	smad7	smad7	https://zfin.org/ZDB-GENE-030128-3	SMAD family member 7 [Source:ZFIN;Acc:ZDB-GENE-030128-3]
ENSDARG00000005464	dnase1l3	dnase1l3	https://zfin.org/ZDB-GENE-040426-2170	deoxyribonuclease I-like 3 [Source:ZFIN;Acc:ZDB-GENE-040426-2170]
ENSDARG00000030608	rhogd	rhogd	https://zfin.org/ZDB-GENE-040426-1504	ras homolog gene family, member Gd [Source:ZFIN;Acc:ZDB-GENE-040426-1504]
ENSDARG00000100729	tln1	tln1	https://zfin.org/ZDB-GENE-031002-48	talin 1 [Source:ZFIN;Acc:ZDB-GENE-031002-48]
ENSDARG00000105190	rhbdl3	rhbdl3	https://zfin.org/ZDB-GENE-050417-2	rhomboid, veinlet-like 3 (Drosophila) [Source:ZFIN;Acc:ZDB-GENE-050417-2]
ENSDARG00000056122	gdi1	gdi1	https://zfin.org/ZDB-GENE-050522-504	GDP dissociation inhibitor 1 [Source:ZFIN;Acc:ZDB-GENE-050522-504]
ENSDARG00000097696	si:ch73-71c20.5	si:ch73-71c20.5	https://zfin.org/ZDB-GENE-060810-58	si:ch73-71c20.5 [Source:ZFIN;Acc:ZDB-GENE-060810-58]
ENSDARG00000042555	dym	dym	https://zfin.org/ZDB-GENE-091204-348	dymeclin [Source:ZFIN;Acc:ZDB-GENE-091204-348]
ENSDARG00000089076	gphna	gphna	https://zfin.org/ZDB-GENE-110127-3	gephyrin a [Source:ZFIN;Acc:ZDB-GENE-110127-3]
ENSDARG00000057683	mcm6	mcm6	https://zfin.org/ZDB-GENE-030909-6	minichromosome maintenance complex component 6 [Source:ZFIN;Acc:ZDB-GENE-030909-6]
ENSDARG00000076066	march6	march6	https://zfin.org/ZDB-GENE-070912-530	membrane-associated ring finger (C3HC4) 6 [Source:ZFIN;Acc:ZDB-GENE-070912-530]
ENSDARG00000020820	srp68	srp68	https://zfin.org/ZDB-GENE-040831-3	signal recognition particle 68 [Source:ZFIN;Acc:ZDB-GENE-040831-3]
ENSDARG00000032005	ccdc65	ccdc65	https://zfin.org/ZDB-GENE-030616-358	coiled-coil domain containing 65 [Source:ZFIN;Acc:ZDB-GENE-030616-358]
ENSDARG00000105452	plxna1a	plxna1a	https://zfin.org/ZDB-GENE-140106-137	plexin A1a [Source:ZFIN;Acc:ZDB-GENE-140106-137]
ENSDARG00000091902	b3gnt2b	b3gnt2b	https://zfin.org/ZDB-GENE-050913-158	UDP-GlcNAc:betaGal beta-1,3-N-acetylglucosaminyltransferase 2b [Source:ZFIN;Acc:ZDB-GENE-050913-158]
ENSDARG00000003961	parp3	parp3	https://zfin.org/ZDB-GENE-030131-7435	poly (ADP-ribose) polymerase family, member 3 [Source:ZFIN;Acc:ZDB-GENE-030131-7435]
ENSDARG00000040717	macc1	macc1	https://zfin.org/ZDB-GENE-091006-3	metastasis associated in colon cancer 1 [Source:ZFIN;Acc:ZDB-GENE-091006-3]
ENSDARG00000004706	syf2	syf2	https://zfin.org/ZDB-GENE-040801-170	SYF2 pre-mRNA-splicing factor [Source:ZFIN;Acc:ZDB-GENE-040801-170]
ENSDARG00000092855	SRBD1	SRBD1	https://zfin.org/ZDB-GENE-060503-663	si:ch211-117n7.8 [Source:ZFIN;Acc:ZDB-GENE-060503-663]
ENSDARG00000070522	cacna1i	cacna1i	https://zfin.org/ZDB-GENE-060503-324	calcium channel, voltage-dependent, T type, alpha 1I subunit [Source:ZFIN;Acc:ZDB-GENE-060503-324]
ENSDARG00000101308	smug1	smug1	https://zfin.org/ZDB-GENE-030131-9473	single-strand-selective monofunctional uracil-DNA glycosylase 1 [Source:ZFIN;Acc:ZDB-GENE-030131-9473]
ENSDARG00000087330	maza	maza	https://zfin.org/ZDB-GENE-110603-4	MYC-associated zinc finger protein a (purine-binding transcription factor) [Source:ZFIN;Acc:ZDB-GENE-110603-4]
ENSDARG00000088590	pxna	pxna	https://zfin.org/ZDB-GENE-040105-1	paxillin a [Source:ZFIN;Acc:ZDB-GENE-040105-1]
ENSDARG00000011091	drd2b	drd2b	https://zfin.org/ZDB-GENE-030910-2	dopamine receptor D2b [Source:ZFIN;Acc:ZDB-GENE-030910-2]
ENSDARG00000020279	efcab7	efcab7	https://zfin.org/ZDB-GENE-040625-115	EF-hand calcium binding domain 7 [Source:ZFIN;Acc:ZDB-GENE-040625-115]
ENSDARG00000002377	mief2	mief2	https://zfin.org/ZDB-GENE-060929-864	mitochondrial elongation factor 2 [Source:ZFIN;Acc:ZDB-GENE-060929-864]
ENSDARG00000099630	si:dkey-24m12.2	si:dkey-24m12.2	https://zfin.org/ZDB-GENE-090716-1	si:dkey-24m12.2 [Source:ZFIN;Acc:ZDB-GENE-090716-1]
ENSDARG00000023396	atg5	atg5	https://zfin.org/ZDB-GENE-040801-149	ATG5 autophagy related 5 homolog (S. cerevisiae) [Source:ZFIN;Acc:ZDB-GENE-040801-149]
ENSDARG00000058068	tnfsf10l4	tnfsf10l4	https://zfin.org/ZDB-GENE-050227-6	tumor necrosis factor (ligand) superfamily, member 10 like 4 [Source:ZFIN;Acc:ZDB-GENE-050227-6]
ENSDARG00000007603	stxbp2	stxbp2	https://zfin.org/ZDB-GENE-040426-2482	syntaxin binding protein 2 [Source:ZFIN;Acc:ZDB-GENE-040426-2482]
ENSDARG00000089637	rnaseh2c	rnaseh2c	https://zfin.org/ZDB-GENE-030131-2469	ribonuclease H2, subunit C [Source:ZFIN;Acc:ZDB-GENE-030131-2469]
ENSDARG00000099652	xpot	xpot	https://zfin.org/ZDB-GENE-041210-4	exportin, tRNA (nuclear export receptor for tRNAs) [Source:ZFIN;Acc:ZDB-GENE-041210-4]
ENSDARG00000056369	ufsp2	ufsp2	https://zfin.org/ZDB-GENE-030131-8726	ufm1-specific peptidase 2 [Source:ZFIN;Acc:ZDB-GENE-030131-8726]
ENSDARG00000067713	snx18a	snx18a	https://zfin.org/ZDB-GENE-070705-339	sorting nexin 18a [Source:ZFIN;Acc:ZDB-GENE-070705-339]
ENSDARG00000015184	mpp3a	mpp3a	https://zfin.org/ZDB-GENE-130530-555	membrane protein, palmitoylated 3a (MAGUK p55 subfamily member 3) [Source:ZFIN;Acc:ZDB-GENE-130530-555]
ENSDARG00000101210	glg1b	glg1b	https://zfin.org/ZDB-GENE-060825-255	golgi glycoprotein 1b [Source:ZFIN;Acc:ZDB-GENE-060825-255]
ENSDARG00000099752	si:dkey-19b23.7	si:dkey-19b23.7	https://zfin.org/ZDB-GENE-141216-311	si:dkey-19b23.7 [Source:ZFIN;Acc:ZDB-GENE-141216-311]
ENSDARG00000052649	ube2ia	ube2ia	https://zfin.org/ZDB-GENE-010607-1	ubiquitin-conjugating enzyme E2Ia [Source:ZFIN;Acc:ZDB-GENE-010607-1]
ENSDARG00000009313	NAPSA	NAPSA	https://zfin.org/ZDB-GENE-030131-8690	zgc:63831 [Source:ZFIN;Acc:ZDB-GENE-030131-8690]
ENSDARG00000045563	ccdc53	ccdc53	https://zfin.org/ZDB-GENE-040426-783	coiled-coil domain containing 53 [Source:ZFIN;Acc:ZDB-GENE-040426-783]
ENSDARG00000100677	tmem205	tmem205	https://zfin.org/ZDB-GENE-070112-1692	transmembrane protein 205 [Source:ZFIN;Acc:ZDB-GENE-070112-1692]
ENSDARG00000104283	cdc42bpaa	cdc42bpaa	https://zfin.org/ZDB-GENE-120727-12	CDC42 binding protein kinase alpha (DMPK-like) a [Source:ZFIN;Acc:ZDB-GENE-120727-12]
ENSDARG00000021579	orc5	orc5	https://zfin.org/ZDB-GENE-040426-2275	origin recognition complex, subunit 5 [Source:ZFIN;Acc:ZDB-GENE-040426-2275]
ENSDARG00000063451	ccdc13	ccdc13	https://zfin.org/ZDB-GENE-061207-11	coiled-coil domain containing 13 [Source:ZFIN;Acc:ZDB-GENE-061207-11]
ENSDARG00000012219	dpf2	dpf2	https://zfin.org/ZDB-GENE-041024-2	D4, zinc and double PHD fingers family 2 [Source:ZFIN;Acc:ZDB-GENE-041024-2]
ENSDARG00000088187	sowah1	sowah1	https://zfin.org/ZDB-GENE-090313-96	sosondowah ankyrin repeat domain family 1 [Source:ZFIN;Acc:ZDB-GENE-090313-96]
ENSDARG00000053569	sox3	sox3	https://zfin.org/ZDB-GENE-980526-333	SRY (sex determining region Y)-box 3 [Source:ZFIN;Acc:ZDB-GENE-980526-333]
ENSDARG00000102844	si:ch211-143l19.2	si:ch211-143l19.2	https://zfin.org/ZDB-GENE-141216-306	si:ch211-143l19.2 [Source:ZFIN;Acc:ZDB-GENE-141216-306]
ENSDARG00000099054	si:ch211-143l19.3	si:ch211-143l19.3	https://zfin.org/ZDB-GENE-141222-102	si:ch211-143l19.3 [Source:ZFIN;Acc:ZDB-GENE-141222-102]
ENSDARG00000105035	anapc2	anapc2	https://zfin.org/ZDB-GENE-081104-256	anaphase promoting complex subunit 2 [Source:ZFIN;Acc:ZDB-GENE-081104-256]
ENSDARG00000097493	si:dkey-148h10.5	si:dkey-148h10.5	https://zfin.org/ZDB-GENE-131127-260	si:dkey-148h10.5 [Source:ZFIN;Acc:ZDB-GENE-131127-260]
ENSDARG00000102439	znf1149	znf1149	https://zfin.org/ZDB-GENE-141212-229	zinc finger protein 1149 [Source:ZFIN;Acc:ZDB-GENE-141212-229]
ENSDARG00000029107	ube2d1a	ube2d1a	https://zfin.org/ZDB-GENE-040426-1609	ubiquitin-conjugating enzyme E2D 1a [Source:ZFIN;Acc:ZDB-GENE-040426-1609]
ENSDARG00000097673	si:ch73-267i21.1	si:ch73-267i21.1	https://zfin.org/ZDB-GENE-131127-622	si:ch73-267i21.1 [Source:ZFIN;Acc:ZDB-GENE-131127-622]
ENSDARG00000074895	tysnd1	tysnd1	https://zfin.org/ZDB-GENE-030131-8525	trypsin domain containing 1 [Source:ZFIN;Acc:ZDB-GENE-030131-8525]
ENSDARG00000059483	tead1b	tead1b	https://zfin.org/ZDB-GENE-091013-5	TEA domain family member 1b [Source:ZFIN;Acc:ZDB-GENE-091013-5]
ENSDARG00000037514	hdac3	hdac3	https://zfin.org/ZDB-GENE-040426-847	histone deacetylase 3 [Source:ZFIN;Acc:ZDB-GENE-040426-847]
ENSDARG00000098669	exd1	exd1	https://zfin.org/ZDB-GENE-060825-267	exonuclease 3'-5' domain containing 1 [Source:ZFIN;Acc:ZDB-GENE-060825-267]
ENSDARG00000042467	tlk1a	tlk1a	https://zfin.org/ZDB-GENE-071008-2	tousled-like kinase 1a [Source:ZFIN;Acc:ZDB-GENE-071008-2]
ENSDARG00000059386	dtwd1	dtwd1	https://zfin.org/ZDB-GENE-041010-23	DTW domain containing 1 [Source:ZFIN;Acc:ZDB-GENE-041010-23]
ENSDARG00000091555	ostf1	ostf1	https://zfin.org/ZDB-GENE-040625-157	osteoclast stimulating factor 1 [Source:ZFIN;Acc:ZDB-GENE-040625-157]
ENSDARG00000053500	cbsa	cbsa	https://zfin.org/ZDB-GENE-050417-367	cystathionine-beta-synthase a [Source:ZFIN;Acc:ZDB-GENE-050417-367]
ENSDARG00000056795	serpine1	serpine1	https://zfin.org/ZDB-GENE-070912-60	serpin peptidase inhibitor, clade E (nexin, plasminogen activator inhibitor type 1), member 1 [Source:ZFIN;Acc:ZDB-GENE-070912-60]
ENSDARG00000095765	si:ch1073-221c23.2	si:ch1073-221c23.2	https://zfin.org/ZDB-GENE-081104-78	si:ch1073-221c23.2 [Source:ZFIN;Acc:ZDB-GENE-081104-78]
ENSDARG00000068021	ece2a	ece2a	https://zfin.org/ZDB-GENE-070912-214	endothelin converting enzyme 2a [Source:ZFIN;Acc:ZDB-GENE-070912-214]
ENSDARG00000098525	si:ch73-49h18.3	si:ch73-49h18.3	https://zfin.org/ZDB-GENE-141216-486	si:ch73-49h18.3 [Source:ZFIN;Acc:ZDB-GENE-141216-486]
ENSDARG00000102974	baz2a	baz2a	https://zfin.org/ZDB-GENE-041010-202	bromodomain adjacent to zinc finger domain, 2A [Source:ZFIN;Acc:ZDB-GENE-041010-202]
ENSDARG00000070485	apitd1	apitd1	https://zfin.org/ZDB-GENE-080723-52	apoptosis-inducing, TAF9-like domain 1 [Source:ZFIN;Acc:ZDB-GENE-080723-52]
ENSDARG00000061169	larp1b	larp1b	https://zfin.org/ZDB-GENE-030131-4154	La ribonucleoprotein domain family, member 1B [Source:ZFIN;Acc:ZDB-GENE-030131-4154]
ENSDARG00000076040	arl15a	arl15a	https://zfin.org/ZDB-GENE-070209-3	ADP-ribosylation factor-like 15a [Source:ZFIN;Acc:ZDB-GENE-070209-3]
ENSDARG00000077307	tmem201	tmem201	https://zfin.org/ZDB-GENE-070410-61	transmembrane protein 201 [Source:ZFIN;Acc:ZDB-GENE-070410-61]
ENSDARG00000077948	usp54a	usp54a	https://zfin.org/ZDB-GENE-090828-2	ubiquitin specific peptidase 54a [Source:ZFIN;Acc:ZDB-GENE-090828-2]
ENSDARG00000103774	limch1b	limch1b	https://zfin.org/ZDB-GENE-030131-9210	LIM and calponin homology domains 1b [Source:ZFIN;Acc:ZDB-GENE-030131-9210]
ENSDARG00000025855	camk2n1a	camk2n1a	https://zfin.org/ZDB-GENE-050522-319	calcium/calmodulin-dependent protein kinase II inhibitor 1a [Source:ZFIN;Acc:ZDB-GENE-050522-319]
ENSDARG00000053535	lmo7b	lmo7b	https://zfin.org/ZDB-GENE-060825-242	LIM domain 7b [Source:ZFIN;Acc:ZDB-GENE-060825-242]
ENSDARG00000100857	si:ch1073-155h19.1	si:ch1073-155h19.1	https://zfin.org/ZDB-GENE-141216-178	si:ch1073-155h19.1 [Source:ZFIN;Acc:ZDB-GENE-141216-178]
ENSDARG00000061024	rabggta	rabggta	https://zfin.org/ZDB-GENE-060929-1042	Rab geranylgeranyltransferase, alpha subunit [Source:ZFIN;Acc:ZDB-GENE-060929-1042]
ENSDARG00000002601	irx7	irx7	https://zfin.org/ZDB-GENE-020103-1	iroquois homeobox 7 [Source:ZFIN;Acc:ZDB-GENE-020103-1]
ENSDARG00000011615	mybpc3	mybpc3	https://zfin.org/ZDB-GENE-070112-2362	myosin binding protein C, cardiac [Source:ZFIN;Acc:ZDB-GENE-070112-2362]
ENSDARG00000015803	smcr8b	smcr8b	https://zfin.org/ZDB-GENE-061122-1	Smith-Magenis syndrome chromosome region, candidate 8b [Source:ZFIN;Acc:ZDB-GENE-061122-1]
ENSDARG00000037739	zgc:112980	zgc:112980	https://zfin.org/ZDB-GENE-050306-1	zgc:112980 [Source:ZFIN;Acc:ZDB-GENE-050306-1]
ENSDARG00000018961	gtpbp4	gtpbp4	https://zfin.org/ZDB-GENE-030131-5982	GTP binding protein 4 [Source:ZFIN;Acc:ZDB-GENE-030131-5982]
ENSDARG00000021398	mul1a	mul1a	https://zfin.org/ZDB-GENE-050102-5	mitochondrial E3 ubiquitin protein ligase 1a [Source:ZFIN;Acc:ZDB-GENE-050102-5]
ENSDARG00000089976	spcs3	spcs3	https://zfin.org/ZDB-GENE-040426-2206	signal peptidase complex subunit 3 [Source:ZFIN;Acc:ZDB-GENE-040426-2206]
ENSDARG00000070686	cdipt	cdipt	https://zfin.org/ZDB-GENE-040426-2536	CDP-diacylglycerol--inositol 3-phosphatidyltransferase (phosphatidylinositol synthase) [Source:ZFIN;Acc:ZDB-GENE-040426-2536]
ENSDARG00000035692	rps3a	rps3a	https://zfin.org/ZDB-GENE-030131-9184	ribosomal protein S3A [Source:ZFIN;Acc:ZDB-GENE-030131-9184]
ENSDARG00000045562	pus1	pus1	https://zfin.org/ZDB-GENE-041212-26	pseudouridylate synthase 1 [Source:ZFIN;Acc:ZDB-GENE-041212-26]
ENSDARG00000101472	pop4	pop4	https://zfin.org/ZDB-GENE-050522-505	POP4 homolog, ribonuclease P/MRP subunit [Source:ZFIN;Acc:ZDB-GENE-050522-505]
ENSDARG00000019924	cmpk	cmpk	https://zfin.org/ZDB-GENE-040426-2113	cytidylate kinase [Source:ZFIN;Acc:ZDB-GENE-040426-2113]
ENSDARG00000041665	mkrn1	mkrn1	https://zfin.org/ZDB-GENE-020213-1	makorin, ring finger protein, 1 [Source:ZFIN;Acc:ZDB-GENE-020213-1]
ENSDARG00000053810	hnrnpc	hnrnpc	https://zfin.org/ZDB-GENE-040426-2043	heterogeneous nuclear ribonucleoprotein C [Source:ZFIN;Acc:ZDB-GENE-040426-2043]
ENSDARG00000037153	atp6ap1b	atp6ap1b	https://zfin.org/ZDB-GENE-020423-2	ATPase, H+ transporting, lysosomal accessory protein 1b [Source:ZFIN;Acc:ZDB-GENE-020423-2]
ENSDARG00000091001	mycbp	mycbp	https://zfin.org/ZDB-GENE-060331-97	c-myc binding protein [Source:ZFIN;Acc:ZDB-GENE-060331-97]
ENSDARG00000014582	exoc3	exoc3	https://zfin.org/ZDB-GENE-030131-5947	exocyst complex component 3 [Source:ZFIN;Acc:ZDB-GENE-030131-5947]
ENSDARG00000017366	prdm4	prdm4	https://zfin.org/ZDB-GENE-041210-131	PR domain containing 4 [Source:ZFIN;Acc:ZDB-GENE-041210-131]
ENSDARG00000019808	evpla	evpla	https://zfin.org/ZDB-GENE-030829-19	envoplakin a [Source:ZFIN;Acc:ZDB-GENE-030829-19]
ENSDARG00000097314	si:zfos-1714f5.3	si:zfos-1714f5.3	https://zfin.org/ZDB-GENE-131127-148	si:zfos-1714f5.3 [Source:ZFIN;Acc:ZDB-GENE-131127-148]
ENSDARG00000079560	ptprh	ptprh.1	https://zfin.org/ZDB-GENE-091118-90	protein tyrosine phosphatase, receptor type, h [Source:ZFIN;Acc:ZDB-GENE-091118-90]
ENSDARG00000060338	trmt12	trmt12	https://zfin.org/ZDB-GENE-060825-182	tRNA methyltransferase 12 homolog (S. cerevisiae) [Source:ZFIN;Acc:ZDB-GENE-060825-182]
ENSDARG00000076833	atp1b1b	atp1b1b	https://zfin.org/ZDB-GENE-001127-4	ATPase, Na+/K+ transporting, beta 1b polypeptide [Source:ZFIN;Acc:ZDB-GENE-001127-4]
ENSDARG00000086453	cx52.9	cx52.9	https://zfin.org/ZDB-GENE-040426-2421	connexin 52.9 [Source:ZFIN;Acc:ZDB-GENE-040426-2421]
ENSDARG00000086411	srsf10b	srsf10b	https://zfin.org/ZDB-GENE-040426-1415	serine/arginine-rich splicing factor 10b [Source:ZFIN;Acc:ZDB-GENE-040426-1415]
ENSDARG00000073684	quo	quo	https://zfin.org/ZDB-GENE-030131-9944	quattro [Source:ZFIN;Acc:ZDB-GENE-030131-9944]
ENSDARG00000097110	si:dkey-56f14.4	si:dkey-56f14.4	https://zfin.org/ZDB-GENE-131121-272	si:dkey-56f14.4 [Source:ZFIN;Acc:ZDB-GENE-131121-272]
ENSDARG00000053570	si:rp71-46j2.6	si:rp71-46j2.6	https://zfin.org/ZDB-GENE-160114-48	si:rp71-46j2.6 [Source:ZFIN;Acc:ZDB-GENE-160114-48]
ENSDARG00000097904	si:dkey-125i20.2	si:dkey-125i20.2	https://zfin.org/ZDB-GENE-060526-62	si:dkey-125i20.2 [Source:ZFIN;Acc:ZDB-GENE-060526-62]
ENSDARG00000079401	si:dkey-197c15.6	si:dkey-197c15.6	https://zfin.org/ZDB-GENE-060810-147	si:dkey-197c15.6 [Source:ZFIN;Acc:ZDB-GENE-060810-147]
ENSDARG00000058212	ndnl2	ndnl2	https://zfin.org/ZDB-GENE-031107-3	necdin-like 2 [Source:ZFIN;Acc:ZDB-GENE-031107-3]
ENSDARG00000102435	plekhf1	plekhf1	https://zfin.org/ZDB-GENE-040426-1289	pleckstrin homology domain containing, family F (with FYVE domain) member 1 [Source:ZFIN;Acc:ZDB-GENE-040426-1289]
ENSDARG00000104108	slco1d1	slco1d1	https://zfin.org/ZDB-GENE-030131-5044	solute carrier organic anion transporter family, member 1D1 [Source:ZFIN;Acc:ZDB-GENE-030131-5044]
ENSDARG00000104856	si:ch211-260e23.7	si:ch211-260e23.7	https://zfin.org/ZDB-GENE-141216-158	si:ch211-260e23.7 [Source:ZFIN;Acc:ZDB-GENE-141216-158]
ENSDARG00000051923	ccnb1	ccnb1	https://zfin.org/ZDB-GENE-000406-10	cyclin B1 [Source:ZFIN;Acc:ZDB-GENE-000406-10]
ENSDARG00000020136	ptges	ptges	https://zfin.org/ZDB-GENE-050407-2	prostaglandin E synthase [Source:ZFIN;Acc:ZDB-GENE-050407-2]
ENSDARG00000056281	cyb561a3a	cyb561a3a	https://zfin.org/ZDB-GENE-060526-374	cytochrome b561 family, member A3a [Source:ZFIN;Acc:ZDB-GENE-060526-374]
ENSDARG00000060980	atp8b1	atp8b1	https://zfin.org/ZDB-GENE-091116-14	ATPase, aminophospholipid transporter, class I, type 8B, member 1 [Source:ZFIN;Acc:ZDB-GENE-091116-14]
ENSDARG00000058372	mcph1	mcph1	https://zfin.org/ZDB-GENE-060421-6122	microcephalin 1 [Source:ZFIN;Acc:ZDB-GENE-060421-6122]
ENSDARG00000051888	ist1	ist1	https://zfin.org/ZDB-GENE-030131-179	increased sodium tolerance 1 homolog (yeast) [Source:ZFIN;Acc:ZDB-GENE-030131-179]
ENSDARG00000030224	ppp2ca	ppp2ca	https://zfin.org/ZDB-GENE-050417-441	protein phosphatase 2, catalytic subunit, alpha isozyme [Source:ZFIN;Acc:ZDB-GENE-050417-441]
ENSDARG00000039931	slc25a33	slc25a33	https://zfin.org/ZDB-GENE-040426-2183	solute carrier family 25 (pyrimidine nucleotide carrier), member 33 [Source:ZFIN;Acc:ZDB-GENE-040426-2183]
ENSDARG00000100782	F7	F7	https://zfin.org/ZDB-GENE-070424-102	zgc:163025 [Source:ZFIN;Acc:ZDB-GENE-070424-102]
ENSDARG00000087780	tiam2a	tiam2a	https://zfin.org/ZDB-GENE-030219-98	T-cell lymphoma invasion and metastasis 2a [Source:ZFIN;Acc:ZDB-GENE-030219-98]
ENSDARG00000099385	LSP1	LSP1	https://zfin.org/	lymphocyte-specific protein 1 [Source:HGNC Symbol;Acc:HGNC:6707]
ENSDARG00000051889	dhodh	dhodh	https://zfin.org/ZDB-GENE-030131-3157	dihydroorotate dehydrogenase [Source:ZFIN;Acc:ZDB-GENE-030131-3157]
ENSDARG00000056642	hdac9b	hdac9b	https://zfin.org/ZDB-GENE-040109-7	histone deacetylase 9b [Source:ZFIN;Acc:ZDB-GENE-040109-7]
ENSDARG00000102929	zgc:101715	zgc:101715	https://zfin.org/ZDB-GENE-040912-59	zgc:101715 [Source:ZFIN;Acc:ZDB-GENE-040912-59]
ENSDARG00000011583	cry1ab	cry1ab	https://zfin.org/ZDB-GENE-010426-3	cryptochrome circadian clock 1ab [Source:ZFIN;Acc:ZDB-GENE-010426-3]
ENSDARG00000060306	tfcp2	tfcp2	https://zfin.org/ZDB-GENE-030131-2523	transcription factor CP2 [Source:ZFIN;Acc:ZDB-GENE-030131-2523]
ENSDARG00000030440	rsrp1	rsrp1	https://zfin.org/ZDB-GENE-060616-210	arginine/serine-rich protein 1 [Source:ZFIN;Acc:ZDB-GENE-060616-210]
ENSDARG00000074985	aurkaip1	aurkaip1	https://zfin.org/ZDB-GENE-070928-24	aurora kinase A interacting protein 1 [Source:ZFIN;Acc:ZDB-GENE-070928-24]
ENSDARG00000089860	atxn7l1	atxn7l1	https://zfin.org/ZDB-GENE-131127-383	ataxin 7-like 1 [Source:ZFIN;Acc:ZDB-GENE-131127-383]
ENSDARG00000039843	znf800b	znf800b	https://zfin.org/ZDB-GENE-040426-1166	zinc finger protein 800b [Source:ZFIN;Acc:ZDB-GENE-040426-1166]
ENSDARG00000043643	ehbp1	ehbp1	https://zfin.org/ZDB-GENE-091006-4	EH domain binding protein 1 [Source:ZFIN;Acc:ZDB-GENE-091006-4]
ENSDARG00000006389	smad2	smad2	https://zfin.org/ZDB-GENE-990603-7	SMAD family member 2 [Source:ZFIN;Acc:ZDB-GENE-990603-7]
ENSDARG00000102831	fam193b	fam193b	https://zfin.org/ZDB-GENE-111102-1	family with sequence similarity 193, member B [Source:ZFIN;Acc:ZDB-GENE-111102-1]
ENSDARG00000099091	si:ch73-158n7.2	si:ch73-158n7.2	https://zfin.org/ZDB-GENE-141216-477	si:ch73-158n7.2 [Source:ZFIN;Acc:ZDB-GENE-141216-477]
ENSDARG00000091099	MYOM2	MYOM2	https://zfin.org/ZDB-GENE-141219-22	si:ch211-270c19.2 [Source:ZFIN;Acc:ZDB-GENE-141219-22]
ENSDARG00000077697	si:dkey-105i14.1	si:dkey-105i14.1	https://zfin.org/ZDB-GENE-081103-64	si:dkey-105i14.1 [Source:ZFIN;Acc:ZDB-GENE-081103-64]
ENSDARG00000024785	ctnna2	ctnna2	https://zfin.org/ZDB-GENE-060815-3	catenin (cadherin-associated protein), alpha 2 [Source:ZFIN;Acc:ZDB-GENE-060815-3]
ENSDARG00000017617	alg6	alg6	https://zfin.org/ZDB-GENE-040808-45	asparagine-linked glycosylation 6 (alpha-1,3,-glucosyltransferase) [Source:ZFIN;Acc:ZDB-GENE-040808-45]
ENSDARG00000096210	znf1050	znf1050	https://zfin.org/ZDB-GENE-110913-27	zinc finger protein 1050 [Source:ZFIN;Acc:ZDB-GENE-110913-27]
ENSDARG00000097585	si:ch211-145d10.7	si:ch211-145d10.7	https://zfin.org/ZDB-GENE-131121-246	si:ch211-145d10.7 [Source:ZFIN;Acc:ZDB-GENE-131121-246]
ENSDARG00000075147	lrrc38a	lrrc38a	https://zfin.org/ZDB-GENE-080327-12	leucine rich repeat containing 38a [Source:ZFIN;Acc:ZDB-GENE-080327-12]
ENSDARG00000006279	rragd	rragd	https://zfin.org/ZDB-GENE-070620-6	ras-related GTP binding D [Source:ZFIN;Acc:ZDB-GENE-070620-6]
ENSDARG00000036282	rnaset2	rnaset2	https://zfin.org/ZDB-GENE-030131-2513	ribonuclease T2 [Source:ZFIN;Acc:ZDB-GENE-030131-2513]
ENSDARG00000090228	gsta.1	gsta.1	https://zfin.org/ZDB-GENE-040426-2720	glutathione S-transferase, alpha tandem duplicate 1 [Source:ZFIN;Acc:ZDB-GENE-040426-2720]
ENSDARG00000014963	triap1	triap1	https://zfin.org/ZDB-GENE-050417-161	TP53 regulated inhibitor of apoptosis 1 [Source:ZFIN;Acc:ZDB-GENE-050417-161]
ENSDARG00000095200	si:ch211-197e7.1	si:ch211-197e7.1	https://zfin.org/ZDB-GENE-081103-26	si:ch211-197e7.1 [Source:ZFIN;Acc:ZDB-GENE-081103-26]
ENSDARG00000060991	mief1	mief1	https://zfin.org/ZDB-GENE-060810-64	mitochondrial elongation factor 1 [Source:ZFIN;Acc:ZDB-GENE-060810-64]
ENSDARG00000023237	syne3	syne3	https://zfin.org/ZDB-GENE-070209-271	spectrin repeat containing, nuclear envelope family member 3 [Source:ZFIN;Acc:ZDB-GENE-070209-271]
ENSDARG00000101961	abhd18	abhd18	https://zfin.org/ZDB-GENE-050306-53	abhydrolase domain containing 18 [Source:ZFIN;Acc:ZDB-GENE-050306-53]
ENSDARG00000039832	gsta.2	gsta.2	https://zfin.org/ZDB-GENE-071004-68	glutathione S-transferase, alpha tandem duplicate 2 [Source:ZFIN;Acc:ZDB-GENE-070822-30]
ENSDARG00000074481	ulk1b	ulk1b	https://zfin.org/ZDB-GENE-071203-2	unc-51 like autophagy activating kinase 1 [Source:ZFIN;Acc:ZDB-GENE-071203-2]
ENSDARG00000058692	fzd3b	fzd3b	https://zfin.org/ZDB-GENE-070122-1	frizzled class receptor 3b [Source:ZFIN;Acc:ZDB-GENE-070122-1]
ENSDARG00000061547	zgc:153409	zgc:153409	https://zfin.org/ZDB-GENE-070927-10	zgc:153409 [Source:ZFIN;Acc:ZDB-GENE-060929-224]
ENSDARG00000056228	pld1a	pld1a	https://zfin.org/ZDB-GENE-031002-2	phospholipase D1a [Source:ZFIN;Acc:ZDB-GENE-031002-2]
ENSDARG00000095157	TMEM14A	TMEM14A	https://zfin.org/ZDB-GENE-070410-137	zgc:163080 [Source:ZFIN;Acc:ZDB-GENE-070410-137]
ENSDARG00000020924	myo1ca	myo1ca	https://zfin.org/ZDB-GENE-070705-190	myosin Ic, paralog a [Source:ZFIN;Acc:ZDB-GENE-070705-190]
ENSDARG00000058292	sephs1	sephs1	https://zfin.org/ZDB-GENE-030131-3670	selenophosphate synthetase 1 [Source:ZFIN;Acc:ZDB-GENE-030131-3670]
ENSDARG00000098112	btc	btc	https://zfin.org/ZDB-GENE-050311-1	betacellulin, epidermal growth factor family member [Source:ZFIN;Acc:ZDB-GENE-050311-1]
ENSDARG00000103851	tnrc6c2	tnrc6c2	https://zfin.org/ZDB-GENE-061207-48	trinucleotide repeat containing 6C2 [Source:ZFIN;Acc:ZDB-GENE-061207-48]
ENSDARG00000104298	si:ch211-241a17.7	si:ch211-241a17.7	https://zfin.org/ZDB-GENE-141216-414	si:ch211-241a17.7 [Source:ZFIN;Acc:ZDB-GENE-141216-414]
ENSDARG00000067517	ccdc15	ccdc15	https://zfin.org/ZDB-GENE-120411-25	coiled-coil domain containing 15 [Source:ZFIN;Acc:ZDB-GENE-120411-25]
ENSDARG00000068366	wu:fc19g04	wu:fc19g04	https://zfin.org/ZDB-GENE-030131-2853	wu:fc19g04 [Source:ZFIN;Acc:ZDB-GENE-030131-2853]
ENSDARG00000037000	fkbp11	fkbp11	https://zfin.org/ZDB-GENE-030616-357	FK506 binding protein 11 [Source:ZFIN;Acc:ZDB-GENE-030616-357]
ENSDARG00000037955	pih1d1	pih1d1	https://zfin.org/ZDB-GENE-050309-147	PIH1 domain containing 1 [Source:ZFIN;Acc:ZDB-GENE-050309-147]
ENSDARG00000094193	si:ch211-197h24.7	si:ch211-197h24.7	https://zfin.org/ZDB-GENE-100920-9	si:ch211-197h24.7 [Source:ZFIN;Acc:ZDB-GENE-100920-9]
ENSDARG00000074899	taok2a	taok2a	https://zfin.org/ZDB-GENE-030131-9416	TAO kinase 2a [Source:ZFIN;Acc:ZDB-GENE-030131-9416]
ENSDARG00000078383	fam195b	fam195b	https://zfin.org/ZDB-GENE-060825-259	family with sequence similarity 195, member B [Source:ZFIN;Acc:ZDB-GENE-060825-259]
ENSDARG00000035519	histh1l	histh1l	https://zfin.org/ZDB-GENE-050417-145	histone H1 like [Source:ZFIN;Acc:ZDB-GENE-050417-145]
ENSDARG00000095715	si:ch211-202e12.3	si:ch211-202e12.3	https://zfin.org/ZDB-GENE-060526-81	si:ch211-202e12.3 [Source:ZFIN;Acc:ZDB-GENE-060526-81]
ENSDARG00000069423	tmie	tmie	https://zfin.org/ZDB-GENE-061207-9	transmembrane inner ear [Source:ZFIN;Acc:ZDB-GENE-061207-9]
ENSDARG00000104178	si:ch73-152o7.1	si:ch73-152o7.1	https://zfin.org/ZDB-GENE-111123-3	si:ch73-152o7.1 [Source:ZFIN;Acc:ZDB-GENE-111123-3]
ENSDARG00000037373	ephb2a	ephb2a	https://zfin.org/ZDB-GENE-070713-2	eph receptor B2a [Source:ZFIN;Acc:ZDB-GENE-070713-2]
ENSDARG00000097346	ten1	ten1	https://zfin.org/ZDB-GENE-030131-8755	TEN1 CST complex subunit [Source:ZFIN;Acc:ZDB-GENE-030131-8755]
ENSDARG00000039989	snrnp48	snrnp48	https://zfin.org/ZDB-GENE-030131-4482	small nuclear ribonucleoprotein 48 (U11/U12) [Source:ZFIN;Acc:ZDB-GENE-030131-4482]
ENSDARG00000002445	prdm1a	prdm1a	https://zfin.org/ZDB-GENE-030131-2193	PR domain containing 1a, with ZNF domain [Source:ZFIN;Acc:ZDB-GENE-030131-2193]
ENSDARG00000007092	xab2	xab2	https://zfin.org/ZDB-GENE-040426-685	XPA binding protein 2 [Source:ZFIN;Acc:ZDB-GENE-040426-685]
ENSDARG00000040031	tardbp	tardbp	https://zfin.org/ZDB-GENE-030131-3777	TAR DNA binding protein [Source:ZFIN;Acc:ZDB-GENE-030131-3777]
ENSDARG00000092066	si:dkey-228i19.34	si:dkey-228i19.34	https://zfin.org/ZDB-GENE-070912-453	si:dkey-228i19.34 [Source:ZFIN;Acc:ZDB-GENE-070912-453]
ENSDARG00000056075	rca2.1	rca2.1	https://zfin.org/ZDB-GENE-050320-60	regulator of complement activation group 2 gene 1 [Source:ZFIN;Acc:ZDB-GENE-050320-60]
ENSDARG00000008097	srsf9	srsf9	https://zfin.org/ZDB-GENE-040426-2397	serine/arginine-rich splicing factor 9 [Source:ZFIN;Acc:ZDB-GENE-040426-2397]
ENSDARG00000093831	znf1121	znf1121	https://zfin.org/ZDB-GENE-110914-9	zinc finger protein 1121 [Source:ZFIN;Acc:ZDB-GENE-110914-9]
ENSDARG00000102433	sytl4	sytl4	https://zfin.org/ZDB-GENE-070209-217	synaptotagmin-like 4 [Source:ZFIN;Acc:ZDB-GENE-070209-217]
ENSDARG00000060123	ca16b	ca16b	https://zfin.org/ZDB-GENE-080818-1	carbonic anhydrase XVI b [Source:ZFIN;Acc:ZDB-GENE-080818-1]
ENSDARG00000099281	si:dkey-112e7.2	si:dkey-112e7.2	https://zfin.org/ZDB-GENE-141216-229	si:dkey-112e7.2 [Source:ZFIN;Acc:ZDB-GENE-141216-229]
ENSDARG00000039211	zgc:77439	zgc:77439	https://zfin.org/ZDB-GENE-031010-24	zgc:77439 [Source:ZFIN;Acc:ZDB-GENE-031010-24]
[truncated: 13,484 more rows]
