# Supplementary material for: scRNA-Seq reveals distinct stem cell populations that drive hair cell regeneration after loss of Fgf and Notch signaling
Source: eLife journal article supplement (doi:10.7554/elife.44431), 2019-01-25
Supplement: supp [file elife-44431-supp-v1.zip › elife_poa_e44431_Supplementary_File_7.xlsx]

## Sheet: README
Genes differentially expressed between dendrogram nodes were calculated using the function FindAllMarkersNode(), and we kept the top 100 genes with the highest p-values for each node comparison.

## Sheet: node16_vs_node17
p_val	avg_logFC	pct.1	pct.2	p_val_adj	Gene.name.uniq	Ensembl.Gene.ID	Associated.Gene.Name	ZFIN.ID	Description
4.96955e-239	1.61369	0.764	0.003	7.69435e-235	tmc2b	ENSDARG00000030311	tmc2b	https://zfin.org/ZDB-GENE-060526-262	transmembrane channel-like 2b [Source:ZFIN;Acc:ZDB-GENE-060526-262]
4.93107e-220	1.55406	0.828	0.022	7.63478e-216	EMB	ENSDARG00000059485	EMB	https://zfin.org/ZDB-GENE-070705-158	si:ch211-261c8.5 [Source:ZFIN;Acc:ZDB-GENE-070705-158]
4.80889e-215	2.00331	0.874	0.036	7.4456e-211	si:dkey-16m19.1	ENSDARG00000097176	si:dkey-16m19.1	https://zfin.org/
1.87771e-214	1.72071	0.833	0.027	2.90726e-210	enkur	ENSDARG00000031248	enkur	https://zfin.org/ZDB-GENE-070718-1	enkurin, TRPC channel interacting protein [Source:ZFIN;Acc:ZDB-GENE-070718-1]
1.2845e-213	1.41572	0.764	0.013	1.9888e-209	daw1	ENSDARG00000021462	daw1	https://zfin.org/ZDB-GENE-050419-255	dynein assembly factor with WDR repeat domains 1 [Source:ZFIN;Acc:ZDB-GENE-050419-255]
3.02409e-209	1.64331	0.828	0.028	4.6822e-205	dnajc5b	ENSDARG00000058147	dnajc5b	https://zfin.org/ZDB-GENE-050413-1	DnaJ (Hsp40) homolog, subfamily C, member 5 beta [Source:ZFIN;Acc:ZDB-GENE-050413-1]
2.95552e-206	2.33144	0.925	0.056	4.57602e-202	tuba1c	ENSDARG00000055216	tuba1c	https://zfin.org/ZDB-GENE-061114-1	tubulin, alpha 1c [Source:ZFIN;Acc:ZDB-GENE-061114-1]
4.89516e-206	2.53474	0.966	0.08	7.57917e-202	atp2b1a	ENSDARG00000012684	atp2b1a	https://zfin.org/ZDB-GENE-030925-29	ATPase, Ca++ transporting, plasma membrane 1a [Source:ZFIN;Acc:ZDB-GENE-030925-29]
9.00141e-202	2.60294	0.983	0.082	1.39369e-197	tuba1a	ENSDARG00000001889	tuba1a	https://zfin.org/ZDB-GENE-090507-4	tubulin, alpha 1a [Source:ZFIN;Acc:ZDB-GENE-090507-4]
1.55738e-195	1.81251	0.879	0.054	2.4113e-191	meig1	ENSDARG00000045705	meig1	https://zfin.org/ZDB-GENE-050320-33	meiosis/spermiogenesis associated 1 [Source:ZFIN;Acc:ZDB-GENE-050320-33]
1.85614e-195	1.20959	0.707	0.013	2.87386e-191	evlb	ENSDARG00000099720	evlb	https://zfin.org/ZDB-GENE-040426-1804	Enah/Vasp-like b [Source:ZFIN;Acc:ZDB-GENE-040426-1804]
4.8894e-195	1.02891	0.69	0.01	7.57025e-191	tekt1	ENSDARG00000101331	tekt1	https://zfin.org/ZDB-GENE-041114-99	tektin 1 [Source:ZFIN;Acc:ZDB-GENE-041114-99]
7.1888e-194	1.39057	0.822	0.036	1.11304e-189	sh3glb2b	ENSDARG00000035470	sh3glb2b	https://zfin.org/ZDB-GENE-040426-833	SH3-domain GRB2-like endophilin B2b [Source:ZFIN;Acc:ZDB-GENE-040426-833]
4.23884e-192	1.97679	0.891	0.06	6.56299e-188	tspan13b	ENSDARG00000070479	tspan13b	https://zfin.org/ZDB-GENE-041010-45	tetraspanin 13b [Source:ZFIN;Acc:ZDB-GENE-041010-45]
1.11897e-190	1.78056	0.897	0.061	1.7325e-186	gipc3	ENSDARG00000053074	gipc3	https://zfin.org/ZDB-GENE-060616-326	GIPC PDZ domain containing family, member 3 [Source:ZFIN;Acc:ZDB-GENE-060616-326]
2.939e-189	1.71824	0.828	0.041	4.55045e-185	hsd17b7	ENSDARG00000088140	hsd17b7	https://zfin.org/ZDB-GENE-061013-378	hydroxysteroid (17-beta) dehydrogenase 7 [Source:ZFIN;Acc:ZDB-GENE-061013-378]
3.7114e-189	1.76704	0.839	0.046	5.74637e-185	si:ch211-284k5.2	ENSDARG00000101455	si:ch211-284k5.2	https://zfin.org/ZDB-GENE-131127-514	si:ch211-284k5.2 [Source:ZFIN;Acc:ZDB-GENE-131127-514]
7.30198e-188	1.65651	0.77	0.03	1.13056e-183	nptna	ENSDARG00000103002	nptna	https://zfin.org/ZDB-GENE-030804-7	neuroplastin a [Source:ZFIN;Acc:ZDB-GENE-030804-7]
7.94553e-187	2.45463	1	0.106	1.23021e-182	rbm24a	ENSDARG00000102995	rbm24a	https://zfin.org/ZDB-GENE-040628-1	RNA binding motif protein 24a [Source:ZFIN;Acc:ZDB-GENE-040628-1]
8.7134e-186	1.26747	0.707	0.017	1.3491e-181	lhfpl5b	ENSDARG00000056458	lhfpl5b	https://zfin.org/ZDB-GENE-080220-51	lipoma HMGIC fusion partner-like 5b [Source:ZFIN;Acc:ZDB-GENE-080220-51]
2.89465e-185	1.04119	0.684	0.013	4.48179e-181	atp6v0cb	ENSDARG00000036577	atp6v0cb	https://zfin.org/ZDB-GENE-030131-4127	ATPase, H+ transporting, lysosomal, V0 subunit cb [Source:ZFIN;Acc:ZDB-GENE-030131-4127]
3.68611e-180	1.10833	0.684	0.016	5.70721e-176	nme5	ENSDARG00000041617	nme5	https://zfin.org/ZDB-GENE-040718-221	NME/NM23 family member 5 [Source:ZFIN;Acc:ZDB-GENE-040718-221]
8.38079e-180	1.8043	0.856	0.059	1.2976e-175	twf2b	ENSDARG00000009727	twf2b	https://zfin.org/ZDB-GENE-050522-238	twinfilin actin-binding protein 2b [Source:ZFIN;Acc:ZDB-GENE-050522-238]
2.95973e-179	1.64219	0.81	0.045	4.58255e-175	atp1b2b	ENSDARG00000034424	atp1b2b	https://zfin.org/ZDB-GENE-010718-1	ATPase, Na+/K+ transporting, beta 2b polypeptide [Source:ZFIN;Acc:ZDB-GENE-010718-1]
2.14761e-178	1.31051	0.655	0.012	3.32514e-174	scg5.1	ENSDARG00000077045	scg5	https://zfin.org/ZDB-GENE-040426-1687	secretogranin V [Source:ZFIN;Acc:ZDB-GENE-040426-1687]
4.57981e-178	1.26899	0.713	0.022	7.09091e-174	RASSF5	ENSDARG00000070601	RASSF5	https://zfin.org/ZDB-GENE-141219-8	si:dkey-85p17.3 [Source:ZFIN;Acc:ZDB-GENE-141219-8]
6.75015e-177	1.11105	0.655	0.013	1.04513e-172	lrrc73	ENSDARG00000063411	lrrc73	https://zfin.org/ZDB-GENE-111118-2	leucine rich repeat containing 73 [Source:ZFIN;Acc:ZDB-GENE-111118-2]
1.45226e-175	1.30663	0.718	0.024	2.24853e-171	atp1a3b	ENSDARG00000104139	atp1a3b	https://zfin.org/ZDB-GENE-001212-8	ATPase, Na+/K+ transporting, alpha 3b polypeptide [Source:ZFIN;Acc:ZDB-GENE-001212-8]
5.22319e-174	1.00633	0.638	0.011	8.08706e-170	EFCAB10	ENSDARG00000092825	EFCAB10	https://zfin.org/ZDB-GENE-041111-13	si:dkey-42p14.3 [Source:ZFIN;Acc:ZDB-GENE-041111-13]
1.20722e-173	1.33806	0.678	0.019	1.86914e-169	sst6	ENSDARG00000093804	sst6	https://zfin.org/ZDB-GENE-081022-199	somatostatin 6 [Source:ZFIN;Acc:ZDB-GENE-081022-199]
4.7728e-173	1.03698	0.644	0.013	7.38973e-169	smpx	ENSDARG00000045302	smpx	https://zfin.org/ZDB-GENE-040704-24	small muscle protein, X-linked [Source:ZFIN;Acc:ZDB-GENE-040704-24]
8.87741e-172	1.14748	0.644	0.013	1.37449e-167	gfi1aa	ENSDARG00000020746	gfi1aa	https://zfin.org/ZDB-GENE-050522-534	growth factor independent 1A transcription repressor a [Source:ZFIN;Acc:ZDB-GENE-050522-534]
3.86955e-171	1.48686	0.655	0.016	5.99122e-167	cpn1.2	ENSDARG00000096728	cpn1	https://zfin.org/ZDB-GENE-030131-9116	carboxypeptidase N, polypeptide 1 [Source:ZFIN;Acc:ZDB-GENE-030131-9116]
4.65805e-171	1.1628	0.672	0.018	7.21205e-167	kif1aa	ENSDARG00000061817	kif1aa	https://zfin.org/ZDB-GENE-100913-3	kinesin family member 1Aa [Source:ZFIN;Acc:ZDB-GENE-100913-3]
1.05532e-170	2.21332	0.885	0.085	1.63395e-166	calml4a	ENSDARG00000075800	calml4a	https://zfin.org/ZDB-GENE-081022-9	calmodulin-like 4a [Source:ZFIN;Acc:ZDB-GENE-081022-9]
3.50349e-170	1.38206	0.672	0.019	5.42445e-166	pou4f1	ENSDARG00000005559	pou4f1	https://zfin.org/ZDB-GENE-000523-2	POU class 4 homeobox 1 [Source:ZFIN;Acc:ZDB-GENE-000523-2]
6.55847e-170	1.24803	0.649	0.016	1.01545e-165	fam228a	ENSDARG00000042936	fam228a	https://zfin.org/ZDB-GENE-041014-83	family with sequence similarity 228, member A [Source:ZFIN;Acc:ZDB-GENE-041014-83]
7.23482e-170	1.31898	0.667	0.019	1.12017e-165	si:dkey-280e21.3	ENSDARG00000056519	si:dkey-280e21.3	https://zfin.org/ZDB-GENE-140106-61	si:dkey-280e21.3 [Source:ZFIN;Acc:ZDB-GENE-140106-61]
3.30997e-169	0.944646	0.592	0.007	5.12482e-165	si:ch211-57i17.5	ENSDARG00000041375	si:ch211-57i17.5	https://zfin.org/ZDB-GENE-041014-39	si:ch211-57i17.5 [Source:ZFIN;Acc:ZDB-GENE-041014-39]
5.70245e-169	0.848565	0.569	0.004	8.82911e-165	tmprss3a	ENSDARG00000053315	tmprss3a	https://zfin.org/ZDB-GENE-070912-70	transmembrane protease, serine 3a [Source:ZFIN;Acc:ZDB-GENE-070912-70]
4.99266e-168	1.39198	0.69	0.024	7.73014e-164	C11orf1	ENSDARG00000101743	C11orf1	https://zfin.org/	chromosome 11 open reading frame 1 [Source:HGNC Symbol;Acc:HGNC:1163]
1.65252e-167	2.41404	0.937	0.116	2.5586e-163	otofb	ENSDARG00000020581	otofb	https://zfin.org/ZDB-GENE-110406-5	otoferlin b [Source:ZFIN;Acc:ZDB-GENE-110406-5]
2.1154e-167	1.0725	0.701	0.025	3.27528e-163	THEM6	ENSDARG00000103914	THEM6	https://zfin.org/ZDB-GENE-070912-341	si:ch73-52e5.2 [Source:ZFIN;Acc:ZDB-GENE-070912-341]
3.62451e-167	1.22861	0.701	0.025	5.61183e-163	tmem178b	ENSDARG00000006747	tmem178b	https://zfin.org/ZDB-GENE-040718-92	transmembrane protein 178B [Source:ZFIN;Acc:ZDB-GENE-040718-92]
2.59579e-166	1.21343	0.695	0.027	4.01907e-162	tescb	ENSDARG00000030839	tescb	https://zfin.org/ZDB-GENE-040426-1903	tescalcin b [Source:ZFIN;Acc:ZDB-GENE-040426-1903]
1.92897e-165	1.2182	0.644	0.016	2.98663e-161	aldocb	ENSDARG00000019702	aldocb	https://zfin.org/ZDB-GENE-030821-1	aldolase C, fructose-bisphosphate, b [Source:ZFIN;Acc:ZDB-GENE-030821-1]
2.44476e-165	1.13025	0.701	0.027	3.78522e-161	RSPH1	ENSDARG00000102261	RSPH1	https://zfin.org/	radial spoke head 1 homolog (Chlamydomonas) [Source:HGNC Symbol;Acc:HGNC:12371]
8.58667e-165	1.08032	0.632	0.015	1.32947e-160	spa17	ENSDARG00000069361	spa17	https://zfin.org/ZDB-GENE-070112-1912	sperm autoantigenic protein 17 [Source:ZFIN;Acc:ZDB-GENE-061027-337]
2.20337e-164	1.05194	0.632	0.015	3.41148e-160	si:ch211-147d7.5	ENSDARG00000095457	si:ch211-147d7.5	https://zfin.org/ZDB-GENE-041014-353	si:ch211-147d7.5 [Source:ZFIN;Acc:ZDB-GENE-041014-353]
1.32075e-160	1.2198	0.701	0.029	2.04492e-156	grxcr1	ENSDARG00000069865	grxcr1	https://zfin.org/ZDB-GENE-070424-166	glutaredoxin, cysteine rich 1 [Source:ZFIN;Acc:ZDB-GENE-070424-166]
9.1512e-160	0.950582	0.621	0.015	1.41688e-155	eef1a1b	ENSDARG00000069951	eef1a1b	https://zfin.org/ZDB-GENE-050417-327	eukaryotic translation elongation factor 1 alpha 1b [Source:ZFIN;Acc:ZDB-GENE-050417-327]
2.78114e-159	0.970193	0.598	0.012	4.30603e-155	tekt4	ENSDARG00000028899	tekt4	https://zfin.org/ZDB-GENE-070410-98	tektin 4 [Source:ZFIN;Acc:ZDB-GENE-070410-98]
1.40049e-156	1.57237	0.833	0.069	2.16838e-152	sncb	ENSDARG00000104945	sncb	https://zfin.org/ZDB-GENE-040426-1615	synuclein, beta [Source:ZFIN;Acc:ZDB-GENE-040426-1615]
7.40586e-156	0.972015	0.626	0.018	1.14665e-151	pacrg	ENSDARG00000087556	pacrg	https://zfin.org/ZDB-GENE-041114-100	PARK2 co-regulated [Source:ZFIN;Acc:ZDB-GENE-041114-100]
3.7512e-155	0.966482	0.592	0.013	5.80799e-151	CD37	ENSDARG00000075515	CD37	https://zfin.org/ZDB-GENE-070820-17	zgc:171713 [Source:ZFIN;Acc:ZDB-GENE-070820-17]
6.35663e-155	1.07947	0.592	0.013	9.84196e-151	osbpl1a	ENSDARG00000105147	osbpl1a	https://zfin.org/ZDB-GENE-050208-657	oxysterol binding protein-like 1A [Source:ZFIN;Acc:ZDB-GENE-050208-657]
1.53523e-153	0.888394	0.603	0.015	2.37699e-149	si:dkey-27p23.3	ENSDARG00000075714	si:dkey-27p23.3	https://zfin.org/ZDB-GENE-070705-453	si:dkey-27p23.3 [Source:ZFIN;Acc:ZDB-GENE-070705-453]
3.06077e-153	1.61862	0.638	0.024	4.739e-149	si:dkey-229d2.7	ENSDARG00000092460	si:dkey-229d2.7	https://zfin.org/ZDB-GENE-060526-265	si:dkey-229d2.7 [Source:ZFIN;Acc:ZDB-GENE-060526-265]
1.17966e-152	1.89589	0.787	0.064	1.82647e-148	camk2n1a	ENSDARG00000025855	camk2n1a	https://zfin.org/ZDB-GENE-050522-319	calcium/calmodulin-dependent protein kinase II inhibitor 1a [Source:ZFIN;Acc:ZDB-GENE-050522-319]
4.66637e-152	1.40041	0.753	0.047	7.22494e-148	hsp90aa1.2	ENSDARG00000024746	hsp90aa1.2	https://zfin.org/ZDB-GENE-031001-3	heat shock protein 90, alpha (cytosolic), class A member 1, tandem duplicate 2 [Source:ZFIN;Acc:ZDB-GENE-031001-3]
2.67448e-151	2.30115	0.851	0.098	4.1409e-147	si:ch73-199k24.2	ENSDARG00000089149	si:ch73-199k24.2	https://zfin.org/ZDB-GENE-131121-321	si:ch73-199k24.2 [Source:ZFIN;Acc:ZDB-GENE-131121-321]
7.98833e-150	1.07079	0.609	0.019	1.23683e-145	si:ch211-163l21.7	ENSDARG00000034457	si:ch211-163l21.7	https://zfin.org/ZDB-GENE-081105-176	si:ch211-163l21.7 [Source:ZFIN;Acc:ZDB-GENE-081105-176]
1.51241e-149	1.10859	0.615	0.019	2.34166e-145	asap1b	ENSDARG00000039729	asap1b	https://zfin.org/ZDB-GENE-091112-16	ArfGAP with SH3 domain, ankyrin repeat and PH domain 1b [Source:ZFIN;Acc:ZDB-GENE-091112-16]
3.09422e-148	0.868142	0.58	0.014	4.79078e-144	ccdc151	ENSDARG00000062978	ccdc151	https://zfin.org/ZDB-GENE-061013-787	coiled-coil domain containing 151 [Source:ZFIN;Acc:ZDB-GENE-061013-787]
3.15792e-148	0.820587	0.58	0.014	4.8894e-144	spata4	ENSDARG00000036189	spata4	https://zfin.org/ZDB-GENE-070424-269	spermatogenesis associated 4 [Source:ZFIN;Acc:ZDB-GENE-050417-153]
2.64544e-147	3.44736	0.885	0.124	4.09593e-143	BX511021.2	ENSDARG00000073936	BX511021.2	https://zfin.org/
6.73924e-147	1.01549	0.615	0.021	1.04344e-142	TESK1.1	ENSDARG00000079281	TESK1	https://zfin.org/ZDB-GENE-030131-7512	si:dkeyp-75h12.2 [Source:ZFIN;Acc:ZDB-GENE-030131-7512]
4.74246e-146	1.34636	0.81	0.07	7.34276e-142	ift27	ENSDARG00000099279	ift27	https://zfin.org/ZDB-GENE-041212-9	intraflagellar transport 27 homolog (Chlamydomonas) [Source:ZFIN;Acc:ZDB-GENE-041212-9]
9.45338e-146	0.999856	0.557	0.012	1.46367e-141	lmo7b	ENSDARG00000053535	lmo7b	https://zfin.org/ZDB-GENE-060825-242	LIM domain 7b [Source:ZFIN;Acc:ZDB-GENE-060825-242]
1.98945e-145	1.33725	0.787	0.066	3.08027e-141	laptm4b	ENSDARG00000035870	laptm4b	https://zfin.org/ZDB-GENE-030616-616	lysosomal protein transmembrane 4 beta [Source:ZFIN;Acc:ZDB-GENE-030616-616]
2.80992e-144	1.09253	0.546	0.011	4.3506e-140	si:ch211-270n8.3	ENSDARG00000093646	si:ch211-270n8.3	https://zfin.org/ZDB-GENE-081028-50	si:ch211-270n8.3 [Source:ZFIN;Acc:ZDB-GENE-081028-50]
8.81892e-143	1.07446	0.644	0.029	1.36543e-138	hsbp1a	ENSDARG00000069425	hsbp1a	https://zfin.org/ZDB-GENE-050320-136	heat shock factor binding protein 1a [Source:ZFIN;Acc:ZDB-GENE-050320-136]
2.5531e-142	0.914464	0.546	0.012	3.95296e-138	CU856539.4	ENSDARG00000090886	CU856539.4	https://zfin.org/
4.9708e-142	1.4611	0.644	0.03	7.69629e-138	si:ch211-270n8.4	ENSDARG00000094423	si:ch211-270n8.4	https://zfin.org/ZDB-GENE-081028-70	si:ch211-270n8.4 [Source:ZFIN;Acc:ZDB-GENE-081028-70]
1.29349e-141	0.817814	0.523	0.009	2.00271e-137	tpd52l1	ENSDARG00000042548	tpd52l1	https://zfin.org/ZDB-GENE-050522-121	tumor protein D52-like 1 [Source:ZFIN;Acc:ZDB-GENE-050522-121]
7.15556e-141	1.24951	0.546	0.013	1.1079e-136	si:ch211-193l2.10	ENSDARG00000099903	si:ch211-193l2.10	https://zfin.org/ZDB-GENE-160114-52	si:ch211-193l2.10 [Source:ZFIN;Acc:ZDB-GENE-160114-52]
2.14596e-139	0.928938	0.569	0.017	3.32259e-135	zgc:171775	ENSDARG00000058381	zgc:171775	https://zfin.org/ZDB-GENE-030131-4309	zgc:171775 [Source:ZFIN;Acc:ZDB-GENE-030131-4309]
5.2122e-139	0.879357	0.483	0.004	8.07005e-135	ribc1	ENSDARG00000055739	ribc1	https://zfin.org/ZDB-GENE-081031-7	RIB43A domain with coiled-coils 1 [Source:ZFIN;Acc:ZDB-GENE-081031-7]
6.47235e-138	0.837982	0.517	0.01	1.00211e-133	ankrd45	ENSDARG00000011326	ankrd45	https://zfin.org/ZDB-GENE-050522-311	ankyrin repeat domain 45 [Source:ZFIN;Acc:ZDB-GENE-050522-311]
8.04205e-138	0.794055	0.523	0.01	1.24515e-133	cfap126	ENSDARG00000070868	cfap126	https://zfin.org/ZDB-GENE-060825-357	cilia and flagella associated protein 126 [Source:ZFIN;Acc:ZDB-GENE-060825-357]
3.08137e-137	0.907633	0.569	0.018	4.77088e-133	myo6b	ENSDARG00000042141	myo6b	https://zfin.org/ZDB-GENE-030318-3	myosin VIb [Source:ZFIN;Acc:ZDB-GENE-030318-3]
6.84982e-137	0.846367	0.54	0.013	1.06056e-132	srpk2	ENSDARG00000029368	srpk2	https://zfin.org/ZDB-GENE-131105-1	SRSF protein kinase 2 [Source:ZFIN;Acc:ZDB-GENE-131105-1]
1.42135e-135	0.780548	0.483	0.006	2.20068e-131	zgc:171927	ENSDARG00000033056	zgc:171927	https://zfin.org/ZDB-GENE-070822-21	zgc:171927 [Source:ZFIN;Acc:ZDB-GENE-070822-21]
1.63991e-135	0.818476	0.506	0.009	2.53907e-131	apba1a	ENSDARG00000103848	apba1a	https://zfin.org/ZDB-GENE-060526-175	amyloid beta (A4) precursor protein-binding, family A, member 1a [Source:ZFIN;Acc:ZDB-GENE-060526-175]
4.6291e-135	1.34919	0.718	0.056	7.16723e-131	bdnf	ENSDARG00000018817	bdnf	https://zfin.org/ZDB-GENE-000412-1	brain-derived neurotrophic factor [Source:ZFIN;Acc:ZDB-GENE-000412-1]
6.73329e-135	0.701896	0.494	0.007	1.04251e-130	vamp2	ENSDARG00000056877	vamp2	https://zfin.org/ZDB-GENE-030131-8225	vesicle-associated membrane protein 2 [Source:ZFIN;Acc:ZDB-GENE-030131-8225]
2.99559e-133	0.850515	0.523	0.013	4.63807e-129	ribc2	ENSDARG00000075177	ribc2	https://zfin.org/ZDB-GENE-050411-27	RIB43A domain with coiled-coils 2 [Source:ZFIN;Acc:ZDB-GENE-050411-27]
7.30682e-131	0.847404	0.494	0.01	1.13132e-126	foxj1a	ENSDARG00000101919	foxj1a	https://zfin.org/ZDB-GENE-060929-1178	forkhead box J1a [Source:ZFIN;Acc:ZDB-GENE-060929-1178]
1.404e-130	0.772271	0.517	0.013	2.17381e-126	dnali1	ENSDARG00000069815	dnali1	https://zfin.org/ZDB-GENE-080204-7	dynein, axonemal, light intermediate chain 1 [Source:ZFIN;Acc:ZDB-GENE-080204-7]
2.48239e-130	1.11294	0.649	0.041	3.84348e-126	itm2cb	ENSDARG00000039650	itm2cb	https://zfin.org/ZDB-GENE-030131-7806	integral membrane protein 2Cb [Source:ZFIN;Acc:ZDB-GENE-030131-7806]
3.84536e-130	0.700389	0.437	0.002	5.95377e-126	baiap2l2b	ENSDARG00000060933	baiap2l2b	https://zfin.org/ZDB-GENE-060503-339	BAI1-associated protein 2-like 2b [Source:ZFIN;Acc:ZDB-GENE-060503-339]
1.04552e-129	0.747138	0.494	0.01	1.61878e-125	si:ch211-38m6.6	ENSDARG00000076959	si:ch211-38m6.6	https://zfin.org/ZDB-GENE-070705-179	si:ch211-38m6.6 [Source:ZFIN;Acc:ZDB-GENE-070705-179]
1.59092e-128	0.828381	0.489	0.01	2.46322e-124	gpr156	ENSDARG00000086215	gpr156	https://zfin.org/ZDB-GENE-060201-2	G protein-coupled receptor 156 [Source:ZFIN;Acc:ZDB-GENE-060201-2]
2.35451e-128	0.913735	0.557	0.021	3.64549e-124	prdm1a	ENSDARG00000002445	prdm1a	https://zfin.org/ZDB-GENE-030131-2193	PR domain containing 1a, with ZNF domain [Source:ZFIN;Acc:ZDB-GENE-030131-2193]
4.33757e-128	1.26127	0.54	0.019	6.71587e-124	otofa	ENSDARG00000030832	otofa	https://zfin.org/ZDB-GENE-030131-7778	otoferlin a [Source:ZFIN;Acc:ZDB-GENE-030131-7778]
5.13855e-128	0.978807	0.523	0.016	7.95601e-124	nrxn3b	ENSDARG00000062693	nrxn3b	https://zfin.org/ZDB-GENE-070206-10	neurexin 3b [Source:ZFIN;Acc:ZDB-GENE-070206-10]
1.30014e-127	1.88829	0.943	0.199	2.01301e-123	si:dkeyp-110e4.11	ENSDARG00000071585	si:dkeyp-110e4.11	https://zfin.org/ZDB-GENE-070424-267	si:dkeyp-110e4.11 [Source:ZFIN;Acc:ZDB-GENE-070424-267]
2.19474e-127	0.891414	0.511	0.013	3.39812e-123	ccdc173	ENSDARG00000077928	ccdc173	https://zfin.org/ZDB-GENE-081104-457	coiled-coil domain containing 173 [Source:ZFIN;Acc:ZDB-GENE-081104-457]
1.48461e-126	0.775742	0.489	0.01	2.29862e-122	mkrn2os.2	ENSDARG00000100728	mkrn2os.2	https://zfin.org/ZDB-GENE-160114-87	MKRN2 opposite strand, tandem duplicate 2 [Source:ZFIN;Acc:ZDB-GENE-160114-87]
1.01004e-125	0.749988	0.517	0.015	1.56384e-121	PIFO	ENSDARG00000097071	PIFO	https://zfin.org/ZDB-GENE-090313-121	si:ch211-66i15.4 [Source:ZFIN;Acc:ZDB-GENE-090313-121]

## Sheet: node17_vs_node16
p_val	avg_logFC	pct.1	pct.2	p_val_adj	Gene.name.uniq	Ensembl.Gene.ID	Associated.Gene.Name	ZFIN.ID	Description
9.79157e-95	-2.2693	1	1	1.51603e-90	si:dkey-205h13.2	ENSDARG00000089429	si:dkey-205h13.2	https://zfin.org/ZDB-GENE-080225-18	si:dkey-205h13.2 [Source:ZFIN;Acc:ZDB-GENE-080225-18]
4.10995e-94	-2.08331	1	1	6.36343e-90	si:rp71-1c10.11	ENSDARG00000096721	si:rp71-1c10.11	https://zfin.org/ZDB-GENE-130603-61	si:rp71-1c10.11 [Source:ZFIN;Acc:ZDB-GENE-130603-61]
8.63752e-94	-2.03809	0.96	0.996	1.33735e-89	zgc:158343	ENSDARG00000099411	zgc:158343	https://zfin.org/ZDB-GENE-061201-9	zgc:158343 [Source:ZFIN;Acc:ZDB-GENE-061201-9]
6.02191e-90	-1.87901	0.954	0.995	9.32373e-86	cldnb	ENSDARG00000009544	cldnb	https://zfin.org/ZDB-GENE-010328-2	claudin b [Source:ZFIN;Acc:ZDB-GENE-010328-2]
4.18561e-83	-1.28256	1	1	6.48059e-79	malat1	ENSDARG00000099970	malat1	https://zfin.org/ZDB-GENE-141216-248	metastasis associated lung adenocarcinoma transcript 1 [Source:ZFIN;Acc:ZDB-GENE-141216-248]
3.19083e-82	-1.39498	0.971	0.994	4.94036e-78	epcam	ENSDARG00000040534	epcam	https://zfin.org/ZDB-GENE-040426-2209	epithelial cell adhesion molecule [Source:ZFIN;Acc:ZDB-GENE-040426-2209]
2.27918e-75	-1.60228	0.799	0.956	3.52886e-71	xbp1	ENSDARG00000035622	xbp1	https://zfin.org/ZDB-GENE-011210-2	X-box binding protein 1 [Source:ZFIN;Acc:ZDB-GENE-011210-2]
9.07573e-75	-2.09568	0.425	0.907	1.4052e-70	krt1-c5	ENSDARG00000026979	krt1-c5	https://zfin.org/ZDB-GENE-060316-3	keratin, type 1, gene c5 [Source:ZFIN;Acc:ZDB-GENE-060316-3]
2.68765e-74	-2.14466	0.609	0.931	4.16128e-70	tmem176l.4	ENSDARG00000074390	tmem176l.4	https://zfin.org/ZDB-GENE-030131-3532	transmembrane protein 176l.4 [Source:ZFIN;Acc:ZDB-GENE-030131-3532]
2.11194e-72	-2.03671	0.58	0.918	3.26991e-68	si:ch211-103f14.3	ENSDARG00000088315	si:ch211-103f14.3	https://zfin.org/ZDB-GENE-110411-160	si:ch211-103f14.3 [Source:ZFIN;Acc:ZDB-GENE-110411-160]
4.30633e-69	-1.5965	0.839	0.951	6.66749e-65	nfkbiab	ENSDARG00000007693	nfkbiab	https://zfin.org/ZDB-GENE-030131-1819	nuclear factor of kappa light polypeptide gene enhancer in B-cells inhibitor, alpha b [Source:ZFIN;Acc:ZDB-GENE-030131-1819]
2.80893e-68	-1.63015	0.764	0.938	4.34907e-64	junba	ENSDARG00000074378	junba	https://zfin.org/ZDB-GENE-040426-2172	jun B proto-oncogene a [Source:ZFIN;Acc:ZDB-GENE-040426-2172]
5.75053e-68	-1.88273	0.563	0.911	8.90354e-64	fam46bb	ENSDARG00000011797	fam46bb	https://zfin.org/ZDB-GENE-060503-431	family with sequence similarity 46, member Bb [Source:ZFIN;Acc:ZDB-GENE-060503-431]
1.40161e-67	-1.87405	0.626	0.907	2.17011e-63	pdia3	ENSDARG00000102640	pdia3	https://zfin.org/ZDB-GENE-031002-9	protein disulfide isomerase family A, member 3 [Source:ZFIN;Acc:ZDB-GENE-031002-9]
3.8172e-67	-2.19324	0.805	0.941	5.91017e-63	zgc:77517	ENSDARG00000028618	zgc:77517	https://zfin.org/ZDB-GENE-040426-1508	zgc:77517 [Source:ZFIN;Acc:ZDB-GENE-040426-1508]
1.64305e-65	-1.89483	0.46	0.875	2.54394e-61	zfp36l1b	ENSDARG00000021443	zfp36l1b	https://zfin.org/ZDB-GENE-030131-2391	zinc finger protein 36, C3H type-like 1b [Source:ZFIN;Acc:ZDB-GENE-030131-2391]
1.47436e-60	-1.66538	0.517	0.858	2.28275e-56	cd9b	ENSDARG00000016691	cd9b	https://zfin.org/ZDB-GENE-040426-2768	CD9 molecule b [Source:ZFIN;Acc:ZDB-GENE-040426-2768]
8.01024e-57	-1.40885	0.649	0.894	1.24023e-52	btg1	ENSDARG00000027249	btg1	https://zfin.org/ZDB-GENE-010726-1	B-cell translocation gene 1, anti-proliferative [Source:ZFIN;Acc:ZDB-GENE-010726-1]
8.04832e-57	-1.77564	0.684	0.886	1.24612e-52	tmsb4x	ENSDARG00000077777	tmsb4x	https://zfin.org/ZDB-GENE-030131-8304	thymosin, beta 4 x [Source:ZFIN;Acc:ZDB-GENE-030131-8304]
7.43329e-56	-1.35707	0.828	0.935	1.1509e-51	junbb	ENSDARG00000104773	junbb	https://zfin.org/ZDB-GENE-040426-2666	jun B proto-oncogene b [Source:ZFIN;Acc:ZDB-GENE-040426-2666]
9.7832e-55	-1.29876	0.638	0.911	1.51473e-50	ucp2	ENSDARG00000043154	ucp2	https://zfin.org/ZDB-GENE-990708-8	uncoupling protein 2 [Source:ZFIN;Acc:ZDB-GENE-990708-8]
2.53927e-53	-1.86274	0.563	0.852	3.93155e-49	phlda2	ENSDARG00000042874	phlda2	https://zfin.org/ZDB-GENE-050522-73	pleckstrin homology-like domain, family A, member 2 [Source:ZFIN;Acc:ZDB-GENE-050522-73]
4.50528e-53	-1.63953	0.724	0.889	6.97553e-49	hspa5	ENSDARG00000103846	hspa5	https://zfin.org/ZDB-GENE-031001-11	heat shock protein 5 [Source:ZFIN;Acc:ZDB-GENE-031001-11]
1.8634e-52	-1.61709	0.695	0.867	2.88509e-48	sdc4	ENSDARG00000059906	sdc4	https://zfin.org/ZDB-GENE-061111-1	syndecan 4 [Source:ZFIN;Acc:ZDB-GENE-061111-1]
2.32142e-52	-1.85723	0.615	0.863	3.59426e-48	id1.1	ENSDARG00000096939	id1	https://zfin.org/
6.43437e-52	-0.688039	1	0.999	9.96233e-48	eef1a1l1	ENSDARG00000020850	eef1a1l1	https://zfin.org/ZDB-GENE-990415-52	eukaryotic translation elongation factor 1 alpha 1, like 1 [Source:ZFIN;Acc:ZDB-GENE-990415-52]
1.52989e-51	-1.56301	0.511	0.835	2.36873e-47	mcl1b	ENSDARG00000008363	mcl1b	https://zfin.org/ZDB-GENE-030825-1	myeloid cell leukemia 1b [Source:ZFIN;Acc:ZDB-GENE-030825-1]
5.6876e-50	-1.62377	0.247	0.768	8.80611e-46	si:ch211-39i22.1	ENSDARG00000087508	si:ch211-39i22.1	https://zfin.org/ZDB-GENE-120215-258	si:ch211-39i22.1 [Source:ZFIN;Acc:ZDB-GENE-120215-258]
8.74514e-50	-1.72001	0.425	0.812	1.35401e-45	klf17	ENSDARG00000038792	klf17	https://zfin.org/ZDB-GENE-010129-1	Kruppel-like factor 17 [Source:ZFIN;Acc:ZDB-GENE-010129-1]
2.02211e-49	-1.40881	0.753	0.895	3.13083e-45	btg2	ENSDARG00000020298	btg2	https://zfin.org/ZDB-GENE-000210-15	B-cell translocation gene 2 [Source:ZFIN;Acc:ZDB-GENE-000210-15]
1.58408e-48	-2.12115	0.603	0.846	2.45263e-44	si:ch211-117m20.5	ENSDARG00000091996	si:ch211-117m20.5	https://zfin.org/ZDB-GENE-030131-12	si:ch211-117m20.5 [Source:ZFIN;Acc:ZDB-GENE-030131-12]
1.06154e-46	-2.00398	0.345	0.772	1.64359e-42	net1	ENSDARG00000032765	net1	https://zfin.org/ZDB-GENE-041121-18	neuroepithelial cell transforming 1 [Source:ZFIN;Acc:ZDB-GENE-041121-18]
1.79412e-46	-1.90069	0.477	0.799	2.77784e-42	spaca4l	ENSDARG00000100431	spaca4l	https://zfin.org/ZDB-GENE-101011-2	sperm acrosome associated 4 like [Source:ZFIN;Acc:ZDB-GENE-101011-2]
3.68229e-46	-0.912387	0.879	0.93	5.70129e-42	sec61g	ENSDARG00000018637	sec61g	https://zfin.org/ZDB-GENE-040718-203	Sec61 translocon gamma subunit [Source:ZFIN;Acc:ZDB-GENE-040718-203]
1.0239e-43	-0.743542	0.966	0.966	1.58531e-39	nme2b.1	ENSDARG00000103791	nme2b.1	https://zfin.org/ZDB-GENE-000210-33	NME/NM23 nucleoside diphosphate kinase 2b, tandem duplicate 1 [Source:ZFIN;Acc:ZDB-GENE-000210-32]
1.0621e-43	-0.877154	0.92	0.958	1.64445e-39	si:dkey-222f2.1	ENSDARG00000043242	si:dkey-222f2.1	https://zfin.org/ZDB-GENE-050208-726	si:dkey-222f2.1 [Source:ZFIN;Acc:ZDB-GENE-050208-726]
1.55719e-43	-1.27948	0.626	0.845	2.41099e-39	gpx1a	ENSDARG00000018146	gpx1a	https://zfin.org/ZDB-GENE-030410-1	glutathione peroxidase 1a [Source:ZFIN;Acc:ZDB-GENE-030410-1]
2.09178e-43	-1.21374	0.724	0.844	3.23871e-39	eef1da	ENSDARG00000102291	eef1da	https://zfin.org/ZDB-GENE-040426-2740	eukaryotic translation elongation factor 1 delta a (guanine nucleotide exchange protein) [Source:ZFIN;Acc:ZDB-GENE-040426-2740]
1.50838e-42	-1.00427	0.672	0.945	2.33542e-38	marcksl1b	ENSDARG00000035715	marcksl1b	https://zfin.org/ZDB-GENE-040426-2315	MARCKS-like 1b [Source:ZFIN;Acc:ZDB-GENE-040426-2315]
1.29557e-40	-1.47973	0.161	0.677	2.00594e-36	tnks1bp1	ENSDARG00000068760	tnks1bp1	https://zfin.org/ZDB-GENE-050208-317	tankyrase 1 binding protein 1 [Source:ZFIN;Acc:ZDB-GENE-050208-317]
1.58644e-39	-1.44082	0.753	0.863	2.45629e-35	icn	ENSDARG00000009978	icn	https://zfin.org/ZDB-GENE-030131-8599	ictacalcin [Source:ZFIN;Acc:ZDB-GENE-030131-8599]
2.13958e-39	-1.7224	0.069	0.617	3.31271e-35	CR847847.1	ENSDARG00000087096	CR847847.1	https://zfin.org/
1.50374e-38	-1.4724	0.264	0.69	2.32825e-34	fxyd6l	ENSDARG00000097057	fxyd6l	https://zfin.org/ZDB-GENE-071205-8	FXYD domain containing ion transport regulator 6 like [Source:ZFIN;Acc:ZDB-GENE-071205-8]
1.00582e-37	-1.41365	0.316	0.711	1.55731e-33	soul2	ENSDARG00000039499	soul2	https://zfin.org/ZDB-GENE-030131-2524	heme-binding protein soul2 [Source:ZFIN;Acc:ZDB-GENE-030131-2524]
1.34892e-37	-1.34515	0.31	0.702	2.08853e-33	cfl1l	ENSDARG00000012972	cfl1l	https://zfin.org/ZDB-GENE-040426-2770	cofilin 1 (non-muscle), like [Source:ZFIN;Acc:ZDB-GENE-040426-2770]
4.44728e-37	-1.01262	0.776	0.842	6.88573e-33	ppib	ENSDARG00000092798	ppib	https://zfin.org/ZDB-GENE-040426-1955	peptidylprolyl isomerase B (cyclophilin B) [Source:ZFIN;Acc:ZDB-GENE-040426-1955]
8.36351e-37	-1.02257	0.684	0.825	1.29492e-32	selm	ENSDARG00000051957	selm	https://zfin.org/ZDB-GENE-030410-4	selenoprotein M [Source:ZFIN;Acc:ZDB-GENE-030410-4]
9.01767e-37	-0.646239	0.96	0.969	1.39621e-32	rpl24	ENSDARG00000099104	rpl24	https://zfin.org/ZDB-GENE-020419-25	ribosomal protein L24 [Source:ZFIN;Acc:ZDB-GENE-020419-25]
1.63618e-36	-1.73978	0.42	0.735	2.5333e-32	sox21a	ENSDARG00000031664	sox21a	https://zfin.org/ZDB-GENE-990715-6	SRY (sex determining region Y)-box 21a [Source:ZFIN;Acc:ZDB-GENE-990715-6]
2.89761e-36	-1.52053	0.73	0.792	4.48638e-32	si:ch211-195b11.3	ENSDARG00000100582	si:ch211-195b11.3	https://zfin.org/ZDB-GENE-141222-6	si:ch211-195b11.3 [Source:ZFIN;Acc:ZDB-GENE-141222-6]
3.1683e-36	-0.606291	1	0.993	4.90548e-32	rplp1	ENSDARG00000021864	rplp1	https://zfin.org/ZDB-GENE-030131-8663	ribosomal protein, large, P1 [Source:ZFIN;Acc:ZDB-GENE-030131-8663]
2.61741e-35	-1.01806	0.678	0.843	4.05253e-31	tmsb	ENSDARG00000054911	tmsb	https://zfin.org/ZDB-GENE-050307-5	thymosin, beta [Source:ZFIN;Acc:ZDB-GENE-050307-5]
3.06163e-35	-1.53148	0.224	0.648	4.74033e-31	rpz5	ENSDARG00000075718	rpz5	https://zfin.org/ZDB-GENE-030131-4678	rapunzel 5 [Source:ZFIN;Acc:ZDB-GENE-030131-4678]
5.87669e-34	-0.702276	0.954	0.971	9.09888e-30	pnrc2	ENSDARG00000053291	pnrc2	https://zfin.org/ZDB-GENE-030131-5475	proline-rich nuclear receptor coactivator 2 [Source:ZFIN;Acc:ZDB-GENE-030131-5475]
6.01962e-34	-0.91252	0.649	0.895	9.32017e-30	cldnh	ENSDARG00000069503	cldnh	https://zfin.org/ZDB-GENE-010328-8	claudin h [Source:ZFIN;Acc:ZDB-GENE-010328-8]
7.84959e-34	-1.53173	0.305	0.678	1.21535e-29	pabpc1b	ENSDARG00000021140	pabpc1b	https://zfin.org/ZDB-GENE-050308-1	poly A binding protein, cytoplasmic 1 b [Source:ZFIN;Acc:ZDB-GENE-050308-1]
1.66527e-33	-2.3266	0.523	0.733	2.57833e-29	cbln20	ENSDARG00000087476	cbln20	https://zfin.org/ZDB-GENE-111109-2	cerebellin 20 [Source:ZFIN;Acc:ZDB-GENE-111109-2]
4.39577e-33	-1.16552	0.546	0.774	6.80597e-29	higd1a	ENSDARG00000022303	higd1a	https://zfin.org/ZDB-GENE-030826-15	HIG1 hypoxia inducible domain family, member 1A [Source:ZFIN;Acc:ZDB-GENE-030826-15]
5.71765e-33	-0.741383	0.931	0.929	8.85264e-29	glulb	ENSDARG00000100003	glulb	https://zfin.org/ZDB-GENE-030131-8417	glutamate-ammonia ligase (glutamine synthase) b [Source:ZFIN;Acc:ZDB-GENE-030131-8417]
6.0758e-33	-1.36256	0.523	0.742	9.40715e-29	hsp90b1	ENSDARG00000003570	hsp90b1	https://zfin.org/ZDB-GENE-031002-1	heat shock protein 90, beta (grp94), member 1 [Source:ZFIN;Acc:ZDB-GENE-031002-1]
6.35952e-33	-1.45452	0.224	0.634	9.84645e-29	moxd1l	ENSDARG00000069296	moxd1l	https://zfin.org/ZDB-GENE-060126-3	monooxygenase, DBH-like 1, like [Source:ZFIN;Acc:ZDB-GENE-060126-3]
3.62188e-32	-1.61711	0.247	0.638	5.60776e-28	ier2	ENSDARG00000099195	ier2	https://zfin.org/ZDB-GENE-030131-9126	immediate early response 2 [Source:ZFIN;Acc:ZDB-GENE-030131-9126]
4.38259e-32	-1.35729	0.316	0.67	6.78556e-28	pdia4	ENSDARG00000018491	pdia4	https://zfin.org/ZDB-GENE-030131-5493	protein disulfide isomerase family A, member 4 [Source:ZFIN;Acc:ZDB-GENE-030131-5493]
5.78896e-32	-0.791397	0.874	0.898	8.96304e-28	eya1	ENSDARG00000014259	eya1	https://zfin.org/ZDB-GENE-990712-18	EYA transcriptional coactivator and phosphatase 1 [Source:ZFIN;Acc:ZDB-GENE-990712-18]
8.45057e-32	-1.31639	0.155	0.6	1.3084e-27	fzd7b	ENSDARG00000027589	fzd7b	https://zfin.org/ZDB-GENE-990415-229	frizzled class receptor 7b [Source:ZFIN;Acc:ZDB-GENE-990415-229]
1.75421e-31	-1.44184	0.701	0.836	2.71604e-27	wu:fj16a03	ENSDARG00000100952	wu:fj16a03	https://zfin.org/	wu:fj16a03 [Source:EntrezGene;Acc:335475]
2.11651e-31	-0.543086	0.983	0.984	3.27699e-27	rpl34	ENSDARG00000029500	rpl34	https://zfin.org/ZDB-GENE-040426-1033	ribosomal protein L34 [Source:ZFIN;Acc:ZDB-GENE-040426-1033]
3.53358e-31	-0.991822	0.983	0.981	5.47105e-27	fosab	ENSDARG00000031683	fosab	https://zfin.org/ZDB-GENE-031222-4	v-fos FBJ murine osteosarcoma viral oncogene homolog Ab [Source:ZFIN;Acc:ZDB-GENE-031222-4]
4.01605e-31	-0.501377	1	0.991	6.21805e-27	RPL37A	ENSDARG00000098458	RPL37A	https://zfin.org/ZDB-GENE-070928-31	zgc:171772 [Source:ZFIN;Acc:ZDB-GENE-070928-31]
5.11022e-31	-0.520218	1	0.992	7.91215e-27	rpl11	ENSDARG00000043509	rpl11	https://zfin.org/ZDB-GENE-040625-147	ribosomal protein L11 [Source:ZFIN;Acc:ZDB-GENE-040625-147]
1.64088e-30	-2.14333	0.695	0.788	2.54058e-26	si:ch211-229d2.5	ENSDARG00000079119	si:ch211-229d2.5	https://zfin.org/ZDB-GENE-121214-200	si:ch211-229d2.5 [Source:ZFIN;Acc:ZDB-GENE-121214-200]
2.61267e-30	-0.595698	0.983	0.968	4.0452e-26	RPL29	ENSDARG00000077717	RPL29	https://zfin.org/ZDB-GENE-040801-167	zgc:92868 [Source:ZFIN;Acc:ZDB-GENE-040801-167]
5.66437e-30	-1.19551	0.368	0.68	8.77014e-26	calr3a	ENSDARG00000103979	calr3a	https://zfin.org/ZDB-GENE-000208-17	calreticulin 3a [Source:ZFIN;Acc:ZDB-GENE-000208-17]
6.54819e-30	-0.480071	1	0.977	1.01386e-25	rplp2	ENSDARG00000101406	rplp2	https://zfin.org/ZDB-GENE-031018-2	ribosomal protein, large P2 [Source:ZFIN;Acc:ZDB-GENE-031018-2]
1.13203e-29	-0.487198	1	0.999	1.75273e-25	si:dkey-151g10.6	ENSDARG00000092807	si:dkey-151g10.6	https://zfin.org/ZDB-GENE-030131-7528	si:dkey-151g10.6 [Source:ZFIN;Acc:ZDB-GENE-030131-7528]
1.6134e-29	-1.2764	0.144	0.576	2.49802e-25	tspan35	ENSDARG00000025757	tspan35	https://zfin.org/ZDB-GENE-040426-1362	tetraspanin 35 [Source:ZFIN;Acc:ZDB-GENE-040426-1362]
1.08319e-28	-1.45145	0.379	0.67	1.6771e-24	krt15	ENSDARG00000036840	krt15	https://zfin.org/ZDB-GENE-040426-2931	keratin 15 [Source:ZFIN;Acc:ZDB-GENE-040426-2931]
1.64585e-28	-0.606572	0.96	0.944	2.54826e-24	rpl35a	ENSDARG00000088030	rpl35a	https://zfin.org/ZDB-GENE-040718-190	ribosomal protein L35a [Source:ZFIN;Acc:ZDB-GENE-040718-190]
5.4974e-28	-1.23139	0.379	0.67	8.51163e-24	klf2a	ENSDARG00000042667	klf2a	https://zfin.org/ZDB-GENE-011109-1	Kruppel-like factor 2a [Source:ZFIN;Acc:ZDB-GENE-011109-1]
6.91564e-28	-1.43689	0.241	0.597	1.07075e-23	gsta.1	ENSDARG00000090228	gsta.1	https://zfin.org/ZDB-GENE-040426-2720	glutathione S-transferase, alpha tandem duplicate 1 [Source:ZFIN;Acc:ZDB-GENE-040426-2720]
1.09829e-27	-1.4833	0.161	0.555	1.70048e-23	si:dkey-16l2.20	ENSDARG00000098191	si:dkey-16l2.20	https://zfin.org/ZDB-GENE-141212-380	si:dkey-16l2.20 [Source:ZFIN;Acc:ZDB-GENE-141212-380]
1.26263e-27	-1.17356	0.172	0.571	1.95493e-23	si:dkey-87o1.2	ENSDARG00000095796	si:dkey-87o1.2	https://zfin.org/ZDB-GENE-110411-217	si:dkey-87o1.2 [Source:ZFIN;Acc:ZDB-GENE-110411-217]
2.34973e-27	-0.490249	1	0.99	3.63809e-23	rps28	ENSDARG00000035860	rps28	https://zfin.org/ZDB-GENE-030131-2022	ribosomal protein S28 [Source:ZFIN;Acc:ZDB-GENE-030131-2022]
2.84766e-27	-0.460074	0.994	0.989	4.40904e-23	rpl36	ENSDARG00000100588	rpl36	https://zfin.org/ZDB-GENE-040622-2	ribosomal protein L36 [Source:ZFIN;Acc:ZDB-GENE-040622-2]
5.30036e-27	-1.77261	0.213	0.575	8.20654e-23	slc1a3a	ENSDARG00000104431	slc1a3a	https://zfin.org/ZDB-GENE-030131-2159	solute carrier family 1 (glial high affinity glutamate transporter), member 3a [Source:ZFIN;Acc:ZDB-GENE-030131-2159]
6.53582e-27	-1.52406	0.207	0.574	1.01194e-22	prss60.2	ENSDARG00000055644	prss60.2	https://zfin.org/ZDB-GENE-050320-109	protease, serine, 60.2 [Source:ZFIN;Acc:ZDB-GENE-050320-109]
1.21774e-26	-0.495122	0.989	0.977	1.88542e-22	rpl18	ENSDARG00000029533	rpl18	https://zfin.org/ZDB-GENE-040801-165	ribosomal protein L18 [Source:ZFIN;Acc:ZDB-GENE-040801-165]
1.64417e-26	-0.481591	0.989	0.981	2.54567e-22	rpl26	ENSDARG00000102317	rpl26	https://zfin.org/ZDB-GENE-040426-2117	ribosomal protein L26 [Source:ZFIN;Acc:ZDB-GENE-040426-2117]
1.69866e-26	-0.550465	0.971	0.935	2.63004e-22	rpl28	ENSDARG00000005791	rpl28	https://zfin.org/ZDB-GENE-040930-10	ribosomal protein L28 [Source:ZFIN;Acc:ZDB-GENE-040930-10]
1.94351e-26	-0.594134	0.96	0.928	3.00913e-22	rpl35	ENSDARG00000018334	rpl35	https://zfin.org/ZDB-GENE-020419-2	ribosomal protein L35 [Source:ZFIN;Acc:ZDB-GENE-020419-2]
2.75636e-26	-1.3718	0.621	0.739	4.26768e-22	si:dkey-152p16.6	ENSDARG00000104181	si:dkey-152p16.6	https://zfin.org/ZDB-GENE-030131-8575	si:dkey-152p16.6 [Source:ZFIN;Acc:ZDB-GENE-030131-8575]
9.24988e-26	-1.29536	0.178	0.558	1.43216e-21	cadm4	ENSDARG00000040291	cadm4	https://zfin.org/ZDB-GENE-041114-138	cell adhesion molecule 4 [Source:ZFIN;Acc:ZDB-GENE-041114-138]
1.92183e-25	-0.504695	0.977	0.961	2.97556e-21	rps8a	ENSDARG00000055996	rps8a	https://zfin.org/ZDB-GENE-030131-8626	ribosomal protein S8a [Source:ZFIN;Acc:ZDB-GENE-030131-8626]
1.99348e-25	-0.50507	1	0.97	3.08651e-21	rps15a	ENSDARG00000010160	rps15a	https://zfin.org/ZDB-GENE-030131-8708	ribosomal protein S15a [Source:ZFIN;Acc:ZDB-GENE-030131-8708]
2.02496e-25	-0.549336	0.954	0.97	3.13525e-21	rplp2l	ENSDARG00000011201	rplp2l	https://zfin.org/ZDB-GENE-070327-2	ribosomal protein, large P2, like [Source:ZFIN;Acc:ZDB-GENE-070327-2]
2.32e-25	-0.580741	0.954	0.929	3.59206e-21	rpl12	ENSDARG00000006691	rpl12	https://zfin.org/ZDB-GENE-030131-5297	ribosomal protein L12 [Source:ZFIN;Acc:ZDB-GENE-030131-5297]
3.38743e-25	-1.25318	0.241	0.587	5.24476e-21	apodb	ENSDARG00000057437	apodb	https://zfin.org/ZDB-GENE-051023-8	apolipoprotein Db [Source:ZFIN;Acc:ZDB-GENE-051023-8]
6.17075e-25	-0.546396	0.937	0.957	9.55418e-21	rpl38	ENSDARG00000006413	rpl38	https://zfin.org/ZDB-GENE-030131-8752	ribosomal protein L38 [Source:ZFIN;Acc:ZDB-GENE-030131-8752]
1.01845e-24	-0.513968	0.989	0.94	1.57686e-20	rpl10a	ENSDARG00000042905	rpl10a	https://zfin.org/ZDB-GENE-030131-2025	ribosomal protein L10a [Source:ZFIN;Acc:ZDB-GENE-030131-2025]
1.08389e-24	-1.63738	0.236	0.57	1.67818e-20	si:dkey-33m11.8	ENSDARG00000055014	si:dkey-33m11.8	https://zfin.org/ZDB-GENE-141215-49	si:dkey-33m11.8 [Source:ZFIN;Acc:ZDB-GENE-141215-49]

## Sheet: cluster1_vs_cluster2
p_val	avg_logFC	pct.1	pct.2	p_val_adj	Gene.name.uniq	Ensembl.Gene.ID	Associated.Gene.Name	ZFIN.ID	Description
5.89247e-25	2.17068	1	1	9.12331e-21	pvalb8	ENSDARG00000037790	pvalb8	https://zfin.org/ZDB-GENE-030805-3	parvalbumin 8 [Source:ZFIN;Acc:ZDB-GENE-030805-3]
4.85227e-24	2.1225	1	0.667	7.51277e-20	anxa5a	ENSDARG00000026406	anxa5a	https://zfin.org/ZDB-GENE-080220-29	annexin A5a [Source:ZFIN;Acc:ZDB-GENE-080220-29]
5.24769e-23	1.78781	0.93	0.083	8.125e-19	si:dkey-229d2.7	ENSDARG00000092460	si:dkey-229d2.7	https://zfin.org/ZDB-GENE-060526-265	si:dkey-229d2.7 [Source:ZFIN;Acc:ZDB-GENE-060526-265]
3.07091e-20	1.47637	0.974	0.617	4.7547e-16	si:ch211-172l8.4	ENSDARG00000101577	si:ch211-172l8.4	https://zfin.org/ZDB-GENE-131127-224	si:ch211-172l8.4 [Source:ZFIN;Acc:ZDB-GENE-131127-224]
4.31947e-20	1.21615	0.991	0.85	6.68784e-16	mcl1a	ENSDARG00000009779	mcl1a	https://zfin.org/ZDB-GENE-000511-7	myeloid cell leukemia 1a [Source:ZFIN;Acc:ZDB-GENE-000511-7]
2.43896e-19	1.21927	0.991	0.567	3.77625e-15	si:dkey-16p21.8	ENSDARG00000096849	si:dkey-16p21.8	https://zfin.org/ZDB-GENE-131121-428	si:dkey-16p21.8 [Source:ZFIN;Acc:ZDB-GENE-131121-428]
3.75211e-18	1.70937	0.763	0.033	5.8094e-14	tekt3	ENSDARG00000045038	tekt3	https://zfin.org/ZDB-GENE-080130-2	tektin 3 [Source:ZFIN;Acc:ZDB-GENE-080130-2]
1.35196e-17	1.66068	0.851	0.217	2.09323e-13	rtn4rl2b	ENSDARG00000037495	rtn4rl2b	https://zfin.org/ZDB-GENE-040310-2	reticulon 4 receptor-like 2b [Source:ZFIN;Acc:ZDB-GENE-040310-2]
1.50627e-17	1.40358	0.763	0.05	2.33215e-13	ODF3L2	ENSDARG00000014209	ODF3L2	https://zfin.org/ZDB-GENE-050417-380	zgc:110183 [Source:ZFIN;Acc:ZDB-GENE-050417-380]
3.12046e-17	1.26336	0.833	0.15	4.8314e-13	cnot10	ENSDARG00000058528	cnot10	https://zfin.org/ZDB-GENE-060929-368	CCR4-NOT transcription complex, subunit 10 [Source:ZFIN;Acc:ZDB-GENE-060929-368]
5.58451e-17	1.19574	0.807	0.083	8.64649e-13	abhd2b	ENSDARG00000045804	abhd2b	https://zfin.org/ZDB-GENE-061027-74	abhydrolase domain containing 2b [Source:ZFIN;Acc:ZDB-GENE-061027-74]
1.30792e-16	1.18505	0.895	0.3	2.02505e-12	C11orf1	ENSDARG00000101743	C11orf1	https://zfin.org/	chromosome 11 open reading frame 1 [Source:HGNC Symbol;Acc:HGNC:1163]
2.02265e-16	1.30116	0.912	0.3	3.13166e-12	tspan3a	ENSDARG00000034753	tspan3a	https://zfin.org/ZDB-GENE-030131-7787	tetraspanin 3a [Source:ZFIN;Acc:ZDB-GENE-030131-7787]
4.42726e-16	1.33004	0.781	0.1	6.85472e-12	si:ch211-193l2.10	ENSDARG00000099903	si:ch211-193l2.10	https://zfin.org/ZDB-GENE-160114-52	si:ch211-193l2.10 [Source:ZFIN;Acc:ZDB-GENE-160114-52]
7.16187e-16	1.29347	0.886	0.3	1.10887e-11	id2a	ENSDARG00000055283	id2a	https://zfin.org/ZDB-GENE-020910-1	inhibitor of DNA binding 2, dominant negative helix-loop-helix protein, a [Source:ZFIN;Acc:ZDB-GENE-020910-1]
5.14444e-15	0.992304	0.833	0.183	7.96514e-11	si:ch211-163l21.7	ENSDARG00000034457	si:ch211-163l21.7	https://zfin.org/ZDB-GENE-081105-176	si:ch211-163l21.7 [Source:ZFIN;Acc:ZDB-GENE-081105-176]
8.03183e-15	0.855101	0.991	0.7	1.24357e-10	tspan13b	ENSDARG00000070479	tspan13b	https://zfin.org/ZDB-GENE-041010-45	tetraspanin 13b [Source:ZFIN;Acc:ZDB-GENE-041010-45]
1.05721e-14	0.965399	0.991	0.583	1.63688e-10	cabp2b	ENSDARG00000052277	cabp2b	https://zfin.org/ZDB-GENE-081028-55	calcium binding protein 2b [Source:ZFIN;Acc:ZDB-GENE-081028-55]
1.32295e-14	2.42171	0.772	0.217	2.04833e-10	si:dkey-11c5.11	ENSDARG00000096637	si:dkey-11c5.11	https://zfin.org/ZDB-GENE-121214-253	si:dkey-11c5.11 [Source:ZFIN;Acc:ZDB-GENE-121214-253]
1.5506e-14	0.938125	0.991	0.667	2.40079e-10	gpx1b	ENSDARG00000006207	gpx1b	https://zfin.org/ZDB-GENE-040912-60	glutathione peroxidase 1b [Source:ZFIN;Acc:ZDB-GENE-040912-60]
3.11106e-14	0.99913	0.667	0.05	4.81686e-10	si:dkeyp-46h3.1	ENSDARG00000094407	si:dkeyp-46h3.1	https://zfin.org/
6.57605e-14	0.943485	1	0.983	1.01817e-09	zgc:109934	ENSDARG00000094210	zgc:109934	https://zfin.org/ZDB-GENE-080722-16	zgc:109934 [Source:ZFIN;Acc:ZDB-GENE-050522-428]
1.8317e-13	1.04168	0.947	0.483	2.83602e-09	camk2n1a	ENSDARG00000025855	camk2n1a	https://zfin.org/ZDB-GENE-050522-319	calcium/calmodulin-dependent protein kinase II inhibitor 1a [Source:ZFIN;Acc:ZDB-GENE-050522-319]
2.23692e-13	0.773892	1	0.667	3.46343e-09	calml4a	ENSDARG00000075800	calml4a	https://zfin.org/ZDB-GENE-081022-9	calmodulin-like 4a [Source:ZFIN;Acc:ZDB-GENE-081022-9]
2.7783e-13	1.59519	0.605	0.017	4.30164e-09	CABZ01067746.1	ENSDARG00000086059	CABZ01067746.1	https://zfin.org/
6.06013e-13	0.68563	0.991	0.85	9.38289e-09	nfe2l2a	ENSDARG00000042824	nfe2l2a	https://zfin.org/ZDB-GENE-030723-2	nuclear factor, erythroid 2-like 2a [Source:ZFIN;Acc:ZDB-GENE-030723-2]
7.4142e-13	1.56928	0.64	0.067	1.14794e-08	rasd1	ENSDARG00000019274	rasd1	https://zfin.org/ZDB-GENE-040426-1473	RAS, dexamethasone-induced 1 [Source:ZFIN;Acc:ZDB-GENE-040426-1473]
8.00183e-13	0.816672	0.991	0.683	1.23892e-08	calm1b	ENSDARG00000034187	calm1b	https://zfin.org/ZDB-GENE-030804-2	calmodulin 1b [Source:ZFIN;Acc:ZDB-GENE-030804-2]
7.94339e-12	0.833053	0.956	0.417	1.22988e-07	nptna	ENSDARG00000103002	nptna	https://zfin.org/ZDB-GENE-030804-7	neuroplastin a [Source:ZFIN;Acc:ZDB-GENE-030804-7]
1.07423e-11	0.972254	0.851	0.283	1.66323e-07	cpn1.2	ENSDARG00000096728	cpn1	https://zfin.org/ZDB-GENE-030131-9116	carboxypeptidase N, polypeptide 1 [Source:ZFIN;Acc:ZDB-GENE-030131-9116]
1.35494e-11	0.888395	0.833	0.283	2.09785e-07	aldocb	ENSDARG00000019702	aldocb	https://zfin.org/ZDB-GENE-030821-1	aldolase C, fructose-bisphosphate, b [Source:ZFIN;Acc:ZDB-GENE-030821-1]
1.73833e-11	0.849779	0.904	0.5	2.69146e-07	tob1b	ENSDARG00000021372	tob1b	https://zfin.org/ZDB-GENE-040426-2151	transducer of ERBB2, 1b [Source:ZFIN;Acc:ZDB-GENE-040426-2151]
3.91675e-11	1.06517	0.632	0.1	6.06431e-07	si:ch211-255p10.3	ENSDARG00000096616	si:ch211-255p10.3	https://zfin.org/ZDB-GENE-121214-339	si:ch211-255p10.3 [Source:ZFIN;Acc:ZDB-GENE-121214-339]
5.01146e-11	0.877943	0.588	0.067	7.75924e-07	atp6v1c2	ENSDARG00000070440	atp6v1c2	https://zfin.org/ZDB-GENE-131127-65	ATPase, H+ transporting, lysosomal, V1 subunit C2 [Source:ZFIN;Acc:ZDB-GENE-131127-65]
5.55018e-11	0.835394	0.754	0.25	8.59334e-07	oaz2a	ENSDARG00000045929	oaz2a	https://zfin.org/ZDB-GENE-121005-1	ornithine decarboxylase antizyme 2a [Source:ZFIN;Acc:ZDB-GENE-121005-1]
6.81964e-11	0.994767	0.561	0.033	1.05589e-06	si:ch211-145b13.5	ENSDARG00000037256	si:ch211-145b13.5	https://zfin.org/ZDB-GENE-090313-35	si:ch211-145b13.5 [Source:ZFIN;Acc:ZDB-GENE-090313-35]
7.50834e-11	0.761244	0.588	0.067	1.16252e-06	sort1b	ENSDARG00000056252	sort1b	https://zfin.org/ZDB-GENE-030131-7447	sortilin 1b [Source:ZFIN;Acc:ZDB-GENE-030131-7447]
1.12359e-10	0.775454	0.982	0.6	1.73966e-06	si:ch73-199k24.2	ENSDARG00000089149	si:ch73-199k24.2	https://zfin.org/ZDB-GENE-131121-321	si:ch73-199k24.2 [Source:ZFIN;Acc:ZDB-GENE-131121-321]
2.65349e-10	1.08578	0.675	0.167	4.1084e-06	dlx3b	ENSDARG00000014626	dlx3b	https://zfin.org/ZDB-GENE-980526-280	distal-less homeobox 3b [Source:ZFIN;Acc:ZDB-GENE-980526-280]
2.9604e-10	0.811055	1	0.667	4.58359e-06	BX511021.2	ENSDARG00000073936	BX511021.2	https://zfin.org/
3.69182e-10	0.823365	0.518	0.033	5.71605e-06	si:ch211-150j10.4	ENSDARG00000079336	si:ch211-150j10.4	https://zfin.org/ZDB-GENE-110411-215	si:ch211-150j10.4 [Source:ZFIN;Acc:ZDB-GENE-110411-215]
5.12291e-10	0.697585	0.535	0.05	7.93179e-06	clic5b	ENSDARG00000070584	clic5b	https://zfin.org/ZDB-GENE-040426-2542	chloride intracellular channel 5b [Source:ZFIN;Acc:ZDB-GENE-040426-2542]
6.59374e-10	0.73659	0.895	0.45	1.02091e-05	gabarapl2	ENSDARG00000027200	gabarapl2	https://zfin.org/ZDB-GENE-040718-336	GABA(A) receptor-associated protein like 2 [Source:ZFIN;Acc:ZDB-GENE-040718-336]
7.32032e-10	0.982164	0.702	0.217	1.1334e-05	DCDC2C	ENSDARG00000103264	DCDC2C	https://zfin.org/ZDB-GENE-160113-73	si:dkey-25g12.4 [Source:ZFIN;Acc:ZDB-GENE-160113-73]
1.15385e-09	0.731711	0.737	0.233	1.7865e-05	trim36	ENSDARG00000062794	trim36	https://zfin.org/ZDB-GENE-040426-2936	tripartite motif containing 36 [Source:ZFIN;Acc:ZDB-GENE-040426-2936]
1.86511e-09	0.83379	0.544	0.067	2.88775e-05	six2b	ENSDARG00000054878	six2b	https://zfin.org/ZDB-GENE-080723-23	SIX homeobox 2b [Source:ZFIN;Acc:ZDB-GENE-080723-23]
1.91603e-09	0.54616	1	1	2.96659e-05	zgc:92066	ENSDARG00000031776	zgc:92066	https://zfin.org/ZDB-GENE-040718-72	zgc:92066 [Source:ZFIN;Acc:ZDB-GENE-040718-72]
2.99897e-09	0.75616	0.939	0.45	4.6433e-05	capgb	ENSDARG00000099672	capgb	https://zfin.org/ZDB-GENE-030131-8541	capping protein (actin filament), gelsolin-like b [Source:ZFIN;Acc:ZDB-GENE-030131-8541]
3.27185e-09	0.767224	0.974	0.833	5.06581e-05	zgc:173593	ENSDARG00000077360	zgc:173593	https://zfin.org/ZDB-GENE-071004-57	zgc:173593 [Source:ZFIN;Acc:ZDB-GENE-071004-57]
4.19708e-09	0.67385	0.842	0.417	6.49834e-05	tescb	ENSDARG00000030839	tescb	https://zfin.org/ZDB-GENE-040426-1903	tescalcin b [Source:ZFIN;Acc:ZDB-GENE-040426-1903]
5.09672e-09	0.65618	0.535	0.083	7.89126e-05	rem1	ENSDARG00000020544	rem1	https://zfin.org/ZDB-GENE-040317-1	RAS (RAD and GEM)-like GTP-binding 1 [Source:ZFIN;Acc:ZDB-GENE-040317-1]
6.34058e-09	0.513985	0.965	0.567	9.81712e-05	dnajc5b	ENSDARG00000058147	dnajc5b	https://zfin.org/ZDB-GENE-050413-1	DnaJ (Hsp40) homolog, subfamily C, member 5 beta [Source:ZFIN;Acc:ZDB-GENE-050413-1]
6.5798e-09	0.499971	0.851	0.317	0.000101875	galnt11	ENSDARG00000063636	galnt11	https://zfin.org/ZDB-GENE-060929-998	UDP-N-acetyl-alpha-D-galactosamine:polypeptide N-acetylgalactosaminyltransferase 11 (GalNAc-T11) [Source:ZFIN;Acc:ZDB-GENE-060929-998]
7.42724e-09	0.586761	0.868	0.517	0.000114996	tmem59	ENSDARG00000019033	tmem59	https://zfin.org/ZDB-GENE-070912-397	transmembrane protein 59 [Source:ZFIN;Acc:ZDB-GENE-070912-397]
8.9507e-09	0.729782	0.491	0.05	0.000138584	ddit3	ENSDARG00000059836	ddit3	https://zfin.org/ZDB-GENE-070410-90	DNA-damage-inducible transcript 3 [Source:ZFIN;Acc:ZDB-GENE-070410-90]
9.06502e-09	0.558259	0.614	0.117	0.000140354	rab11fip1b	ENSDARG00000036462	rab11fip1b	https://zfin.org/ZDB-GENE-091204-322	RAB11 family interacting protein 1 (class I) b [Source:ZFIN;Acc:ZDB-GENE-091204-322]
1.07409e-08	0.702443	0.526	0.083	0.000166301	zgc:158852	ENSDARG00000102076	zgc:158852	https://zfin.org/ZDB-GENE-070112-972	zgc:158852 [Source:ZFIN;Acc:ZDB-GENE-070112-972]
1.09524e-08	0.660228	0.658	0.2	0.000169575	herc1	ENSDARG00000077901	herc1	https://zfin.org/ZDB-GENE-030131-8542	HECT and RLD domain containing E3 ubiquitin protein ligase family member 1 [Source:ZFIN;Acc:ZDB-GENE-030131-8542]
1.47345e-08	0.51316	0.982	0.783	0.000228134	jun	ENSDARG00000043531	jun	https://zfin.org/ZDB-GENE-030131-7859	jun proto-oncogene [Source:ZFIN;Acc:ZDB-GENE-030131-7859]
1.92428e-08	0.763821	0.684	0.217	0.000297936	tmem240b	ENSDARG00000090145	tmem240b	https://zfin.org/ZDB-GENE-131127-474	transmembrane protein 240b [Source:ZFIN;Acc:ZDB-GENE-131127-474]
2.00967e-08	0.526784	0.982	0.767	0.000311157	sepw1	ENSDARG00000035136	sepw1	https://zfin.org/ZDB-GENE-030410-5	selenoprotein W, 1 [Source:ZFIN;Acc:ZDB-GENE-030410-5]
2.06454e-08	0.663976	0.912	0.583	0.000319653	adipor2	ENSDARG00000101849	adipor2	https://zfin.org/ZDB-GENE-041210-60	adiponectin receptor 2 [Source:ZFIN;Acc:ZDB-GENE-041210-60]
2.22137e-08	0.658429	0.719	0.283	0.000343935	stau2	ENSDARG00000026801	stau2	https://zfin.org/ZDB-GENE-040426-687	staufen double-stranded RNA binding protein 2 [Source:ZFIN;Acc:ZDB-GENE-040426-687]
2.84528e-08	0.664262	0.746	0.3	0.000440535	osbpl1a	ENSDARG00000105147	osbpl1a	https://zfin.org/ZDB-GENE-050208-657	oxysterol binding protein-like 1A [Source:ZFIN;Acc:ZDB-GENE-050208-657]
2.84758e-08	0.576962	0.842	0.433	0.000440891	RSPH1	ENSDARG00000102261	RSPH1	https://zfin.org/	radial spoke head 1 homolog (Chlamydomonas) [Source:HGNC Symbol;Acc:HGNC:12371]
3.29105e-08	0.65819	0.596	0.133	0.000509553	ccdc105	ENSDARG00000054136	ccdc105	https://zfin.org/ZDB-GENE-131121-219	coiled-coil domain containing 105 [Source:ZFIN;Acc:ZDB-GENE-131121-219]
3.30125e-08	0.762218	0.439	0.033	0.000511133	si:ch211-218o21.4	ENSDARG00000079869	si:ch211-218o21.4	https://zfin.org/ZDB-GENE-081104-178	si:ch211-218o21.4 [Source:ZFIN;Acc:ZDB-GENE-081104-178]
3.69564e-08	0.524987	0.5	0.067	0.000572196	slc44a2	ENSDARG00000037059	slc44a2	https://zfin.org/ZDB-GENE-030131-3065	solute carrier family 44 (choline transporter), member 2 [Source:ZFIN;Acc:ZDB-GENE-030131-3065]
4.79564e-08	0.564162	0.816	0.333	0.00074251	itm2cb	ENSDARG00000039650	itm2cb	https://zfin.org/ZDB-GENE-030131-7806	integral membrane protein 2Cb [Source:ZFIN;Acc:ZDB-GENE-030131-7806]
4.98861e-08	0.642881	0.86	0.45	0.000772387	bdnf	ENSDARG00000018817	bdnf	https://zfin.org/ZDB-GENE-000412-1	brain-derived neurotrophic factor [Source:ZFIN;Acc:ZDB-GENE-000412-1]
4.98918e-08	0.639669	0.605	0.167	0.000772475	tbc1d14	ENSDARG00000003520	tbc1d14	https://zfin.org/ZDB-GENE-030131-6136	TBC1 domain family, member 14 [Source:ZFIN;Acc:ZDB-GENE-030131-6136]
5.5818e-08	0.606502	0.711	0.267	0.00086423	lmo7b	ENSDARG00000053535	lmo7b	https://zfin.org/ZDB-GENE-060825-242	LIM domain 7b [Source:ZFIN;Acc:ZDB-GENE-060825-242]
6.63808e-08	0.565096	0.693	0.2	0.00102777	CYSTM1	ENSDARG00000073961	CYSTM1	https://zfin.org/ZDB-GENE-091118-113	si:ch211-160j14.2 [Source:ZFIN;Acc:ZDB-GENE-091118-113]
7.41417e-08	0.557677	0.719	0.317	0.00114794	spata4	ENSDARG00000036189	spata4	https://zfin.org/ZDB-GENE-070424-269	spermatogenesis associated 4 [Source:ZFIN;Acc:ZDB-GENE-050417-153]
9.67607e-08	0.627561	0.702	0.25	0.00149815	si:ch211-270n8.3	ENSDARG00000093646	si:ch211-270n8.3	https://zfin.org/ZDB-GENE-081028-50	si:ch211-270n8.3 [Source:ZFIN;Acc:ZDB-GENE-081028-50]
1.0259e-07	0.64899	0.684	0.233	0.0015884	igfbp5b	ENSDARG00000025348	igfbp5b	https://zfin.org/ZDB-GENE-040319-2	insulin-like growth factor binding protein 5b [Source:ZFIN;Acc:ZDB-GENE-040319-2]
1.04346e-07	0.591812	0.649	0.2	0.00161559	si:ch211-38m6.6	ENSDARG00000076959	si:ch211-38m6.6	https://zfin.org/ZDB-GENE-070705-179	si:ch211-38m6.6 [Source:ZFIN;Acc:ZDB-GENE-070705-179]
1.07939e-07	0.762045	0.368	0	0.00167122	zgc:113691	ENSDARG00000038898	zgc:113691	https://zfin.org/ZDB-GENE-050220-7	zgc:113691 [Source:ZFIN;Acc:ZDB-GENE-050220-7]
1.30906e-07	0.568997	0.43	0.033	0.00202682	retsat	ENSDARG00000018600	retsat	https://zfin.org/ZDB-GENE-050320-11	retinol saturase (all-trans-retinol 13,14-reductase) [Source:ZFIN;Acc:ZDB-GENE-050320-11]
1.55382e-07	0.698563	0.816	0.4	0.00240578	fxyd1	ENSDARG00000099014	fxyd1	https://zfin.org/ZDB-GENE-050309-14	FXYD domain containing ion transport regulator 1 (phospholemman) [Source:ZFIN;Acc:ZDB-GENE-050309-14]
1.74104e-07	0.69233	0.544	0.133	0.00269566	sh2d4ba	ENSDARG00000069374	sh2d4ba	https://zfin.org/ZDB-GENE-090313-53	SH2 domain containing 4Ba [Source:ZFIN;Acc:ZDB-GENE-090313-53]
1.79743e-07	0.595485	0.886	0.483	0.00278296	pkma	ENSDARG00000099730	pkma	https://zfin.org/ZDB-GENE-031201-4	pyruvate kinase, muscle, a [Source:ZFIN;Acc:ZDB-GENE-031201-4]
1.85879e-07	0.555179	0.596	0.183	0.00287797	fut8a	ENSDARG00000015449	fut8a	https://zfin.org/ZDB-GENE-031118-20	fucosyltransferase 8a (alpha (1,6) fucosyltransferase) [Source:ZFIN;Acc:ZDB-GENE-031118-20]
2.894e-07	0.485384	0.754	0.383	0.00448077	tmbim4	ENSDARG00000014361	tmbim4	https://zfin.org/ZDB-GENE-040426-2152	transmembrane BAX inhibitor motif containing 4 [Source:ZFIN;Acc:ZDB-GENE-040426-2152]
3.39534e-07	0.582503	0.684	0.267	0.005257	srpk2	ENSDARG00000029368	srpk2	https://zfin.org/ZDB-GENE-131105-1	SRSF protein kinase 2 [Source:ZFIN;Acc:ZDB-GENE-131105-1]
4.52756e-07	0.92646	0.947	0.65	0.00701002	zgc:153867	ENSDARG00000033738	zgc:153867	https://zfin.org/ZDB-GENE-030131-9170	zgc:153867 [Source:ZFIN;Acc:ZDB-GENE-030131-9170]
4.72914e-07	0.470882	0.588	0.167	0.00732212	fscn2b	ENSDARG00000074396	fscn2b	https://zfin.org/ZDB-GENE-040426-1740	fascin actin-bundling protein 2b, retinal [Source:ZFIN;Acc:ZDB-GENE-040426-1740]
4.84595e-07	0.534535	0.36	0.017	0.00750299	lipf	ENSDARG00000018529	lipf	https://zfin.org/ZDB-GENE-040426-2737	lipase, gastric [Source:ZFIN;Acc:ZDB-GENE-040426-2737]
5.57177e-07	0.533255	0.518	0.117	0.00862677	mfap3l	ENSDARG00000062752	mfap3l	https://zfin.org/ZDB-GENE-111229-2	microfibrillar-associated protein 3-like [Source:ZFIN;Acc:ZDB-GENE-111229-2]
5.76048e-07	0.555432	0.649	0.233	0.00891895	apba1a	ENSDARG00000103848	apba1a	https://zfin.org/ZDB-GENE-060526-175	amyloid beta (A4) precursor protein-binding, family A, member 1a [Source:ZFIN;Acc:ZDB-GENE-060526-175]
5.99054e-07	0.53885	0.377	0.033	0.00927516	hsd3b7	ENSDARG00000036966	hsd3b7	https://zfin.org/ZDB-GENE-030131-5673	hydroxy-delta-5-steroid dehydrogenase, 3 beta- and steroid delta-isomerase [Source:ZFIN;Acc:ZDB-GENE-030131-5673]
7.65014e-07	0.548451	0.789	0.383	0.0118447	ndrg3b	ENSDARG00000010052	ndrg3b	https://zfin.org/ZDB-GENE-030131-5606	ndrg family member 3b [Source:ZFIN;Acc:ZDB-GENE-030131-5606]
8.54242e-07	0.530714	0.57	0.183	0.0132262	osbp2	ENSDARG00000053487	osbp2	https://zfin.org/ZDB-GENE-091113-18	oxysterol binding protein 2 [Source:ZFIN;Acc:ZDB-GENE-091113-18]
8.7709e-07	0.547078	0.798	0.4	0.01358	atp6v0a1a	ENSDARG00000020847	atp6v0a1a	https://zfin.org/ZDB-GENE-030131-3027	ATPase, H+ transporting, lysosomal V0 subunit a1a [Source:ZFIN;Acc:ZDB-GENE-030131-3027]
9.00036e-07	0.511213	0.465	0.1	0.0139353	cyp39a1	ENSDARG00000017982	cyp39a1	https://zfin.org/ZDB-GENE-041014-339	cytochrome P450, family 39, subfamily A, polypeptide 1 [Source:ZFIN;Acc:ZDB-GENE-041014-339]
9.67133e-07	0.476078	0.623	0.217	0.0149741	isca2	ENSDARG00000038154	isca2	https://zfin.org/ZDB-GENE-131121-486	iron-sulfur cluster assembly 2 [Source:ZFIN;Acc:ZDB-GENE-131121-486]
1.05193e-06	0.415651	0.746	0.3	0.016287	CD37	ENSDARG00000075515	CD37	https://zfin.org/ZDB-GENE-070820-17	zgc:171713 [Source:ZFIN;Acc:ZDB-GENE-070820-17]
1.12482e-06	0.596514	0.395	0.05	0.0174156	hadhaa	ENSDARG00000057128	hadhaa	https://zfin.org/ZDB-GENE-031222-5	hydroxyacyl-CoA dehydrogenase/3-ketoacyl-CoA thiolase/enoyl-CoA hydratase (trifunctional protein), alpha subunit a [Source:ZFIN;Acc:ZDB-GENE-031222-5]
1.54356e-06	0.479899	0.579	0.167	0.023899	bcat2	ENSDARG00000054849	bcat2	https://zfin.org/ZDB-GENE-040718-425	branched chain amino-acid transaminase 2, mitochondrial [Source:ZFIN;Acc:ZDB-GENE-040718-425]
1.57869e-06	0.618975	0.439	0.083	0.0244429	erich3	ENSDARG00000069262	erich3	https://zfin.org/ZDB-GENE-070209-295	glutamate-rich 3 [Source:ZFIN;Acc:ZDB-GENE-070209-295]

## Sheet: cluster2_vs_cluster1
ensembl_gene_id	external_gene_name	description		zfin_id_id	p_val	avg_diff	pct.1	pct.2	node_enriched
ENSDARG00000096950	BX927244.1		http://zfin.org/	http://zfin.org/	0.0244815	0.250208	0.175	0.017	1
ENSDARG00000071727	si:dkey-37o8.1	si:dkey-37o8.1 [Source:ZFIN;Acc:ZDB-GENE-030131-5667]	http://zfin.org/ZDB-GENE-030131-5667	http://zfin.org/ZDB-GENE-030131-5667	0.000985766	0.250705	0.158	0	1
ENSDARG00000101679	cfap52	cilia and flagella associated protein 52 [Source:ZFIN;Acc:ZDB-GENE-050522-296]	http://zfin.org/ZDB-GENE-050522-296	http://zfin.org/ZDB-GENE-050522-296	0.00457729	0.250968	0.465	0.217	1
ENSDARG00000028973	tekt2	tektin 2 (testicular) [Source:ZFIN;Acc:ZDB-GENE-040113-1]	http://zfin.org/ZDB-GENE-040113-1	http://zfin.org/ZDB-GENE-040113-1	0.0458882	0.251142	0.272	0.1	1
ENSDARG00000033949	fbxo16	F-box protein 16 [Source:ZFIN;Acc:ZDB-GENE-041015-747]	http://zfin.org/ZDB-GENE-041015-747	http://zfin.org/ZDB-GENE-041015-747	0.00523049	0.251252	0.202	0.033	1
ENSDARG00000054208	phkg2	phosphorylase kinase, gamma 2 (testis) [Source:ZFIN;Acc:ZDB-GENE-040426-825]	http://zfin.org/ZDB-GENE-040426-825	http://zfin.org/ZDB-GENE-040426-825	0.00947769	0.251457	0.368	0.183	1
ENSDARG00000019304	phactr3b	phosphatase and actin regulator 3b [Source:ZFIN;Acc:ZDB-GENE-050522-156]	http://zfin.org/ZDB-GENE-050522-156	http://zfin.org/ZDB-GENE-050522-156	0.0354821	0.251635	0.158	0.017	1
ENSDARG00000103521	capsla	calcyphosine-like a [Source:ZFIN;Acc:ZDB-GENE-030131-7291]	http://zfin.org/ZDB-GENE-030131-7291	http://zfin.org/ZDB-GENE-030131-7291	0.413675	0.25207	0.544	0.433	1
ENSDARG00000035519	histh1l	histone H1 like [Source:ZFIN;Acc:ZDB-GENE-050417-145]	http://zfin.org/ZDB-GENE-050417-145	http://zfin.org/ZDB-GENE-050417-145	0.516737	0.252413	0.368	0.333	1
ENSDARG00000068926	si:ch211-137a8.2	si:ch211-137a8.2 [Source:ZFIN;Acc:ZDB-GENE-061103-172]	http://zfin.org/ZDB-GENE-061103-172	http://zfin.org/ZDB-GENE-061103-172	0.0453905	0.252474	0.325	0.133	1
ENSDARG00000077653	rabl6b	RAB, member RAS oncogene family-like 6b [Source:ZFIN;Acc:ZDB-GENE-081104-97]	http://zfin.org/ZDB-GENE-081104-97	http://zfin.org/ZDB-GENE-081104-97	0.00372747	0.253047	0.202	0.05	1
ENSDARG00000103312	CU469384.2		http://zfin.org/	http://zfin.org/	0.00400824	0.253262	0.202	0.017	1
ENSDARG00000103019	gstp2	glutathione S-transferase pi 2 [Source:ZFIN;Acc:ZDB-GENE-050601-1]	http://zfin.org/ZDB-GENE-050601-1	http://zfin.org/ZDB-GENE-050601-1	0.0878835	0.253302	0.404	0.217	1
ENSDARG00000005479	tenm3	teneurin transmembrane protein 3 [Source:ZFIN;Acc:ZDB-GENE-990714-19]	http://zfin.org/ZDB-GENE-990714-19	http://zfin.org/ZDB-GENE-990714-19	5.4906e-05	0.253596	0.333	0.083	1
ENSDARG00000015978	COX5B (1 of many)	zgc:86599 [Source:ZFIN;Acc:ZDB-GENE-040625-180]	http://zfin.org/ZDB-GENE-040625-180	http://zfin.org/ZDB-GENE-040625-180	0.0184376	0.25387	0.982	0.95	1
ENSDARG00000087352	dnah2	dynein, axonemal, heavy chain 2 [Source:ZFIN;Acc:ZDB-GENE-130530-910]	http://zfin.org/ZDB-GENE-130530-910	http://zfin.org/ZDB-GENE-130530-910	0.0158843	0.255123	0.175	0.017	1
ENSDARG00000034852	nt5c2l1	5'-nucleotidase, cytosolic II, like 1 [Source:ZFIN;Acc:ZDB-GENE-031006-8]	http://zfin.org/ZDB-GENE-031006-8	http://zfin.org/ZDB-GENE-031006-8	0.00368406	0.255591	0.289	0.083	1
ENSDARG00000006636	slitrk2	SLIT and NTRK-like family, member 2 [Source:ZFIN;Acc:ZDB-GENE-080327-7]	http://zfin.org/ZDB-GENE-080327-7	http://zfin.org/ZDB-GENE-080327-7	0.0101594	0.256744	0.281	0.083	1
ENSDARG00000007693	nfkbiab	nuclear factor of kappa light polypeptide gene enhancer in B-cells inhibitor, alpha b [Source:ZFIN;Acc:ZDB-GENE-030131-1819]	http://zfin.org/ZDB-GENE-030131-1819	http://zfin.org/ZDB-GENE-030131-1819	0.0639648	0.25711	0.877	0.767	1
ENSDARG00000091471	ECT2L	epithelial cell transforming 2 like [Source:HGNC Symbol;Acc:HGNC:21118]	http://zfin.org/	http://zfin.org/	0.000621408	0.257904	0.167	0	1
ENSDARG00000028000	pfkpa	phosphofructokinase, platelet a [Source:ZFIN;Acc:ZDB-GENE-091112-22]	http://zfin.org/ZDB-GENE-091112-22	http://zfin.org/ZDB-GENE-091112-22	0.00170277	0.25837	0.193	0.05	1
ENSDARG00000054433	yipf6	Yip1 domain family, member 6 [Source:ZFIN;Acc:ZDB-GENE-040625-76]	http://zfin.org/ZDB-GENE-040625-76	http://zfin.org/ZDB-GENE-040625-76	0.0633026	0.258867	0.263	0.1	1
ENSDARG00000074760	ttc7a	tetratricopeptide repeat domain 7A [Source:ZFIN;Acc:ZDB-GENE-010319-27]	http://zfin.org/ZDB-GENE-010319-27	http://zfin.org/ZDB-GENE-010319-27	0.00163175	0.259337	0.202	0.017	1
ENSDARG00000025375	idh1	isocitrate dehydrogenase 1 (NADP+), soluble [Source:ZFIN;Acc:ZDB-GENE-031006-1]	http://zfin.org/ZDB-GENE-031006-1	http://zfin.org/ZDB-GENE-031006-1	0.0136311	0.259731	0.667	0.417	1
ENSDARG00000055589	s100t	S100 calcium binding protein T [Source:ZFIN;Acc:ZDB-GENE-050320-61]	http://zfin.org/ZDB-GENE-050320-61	http://zfin.org/ZDB-GENE-050320-61	1.47451e-05	0.259991	1	1	1
ENSDARG00000028721	mapk14b	mitogen-activated protein kinase 14b [Source:ZFIN;Acc:ZDB-GENE-021007-1]	http://zfin.org/ZDB-GENE-021007-1	http://zfin.org/ZDB-GENE-021007-1	0.0140327	0.260132	0.105	0	1
ENSDARG00000038538	cfap100	cilia and flagella associated protein 100 [Source:ZFIN;Acc:ZDB-GENE-060929-352]	http://zfin.org/ZDB-GENE-060929-352	http://zfin.org/ZDB-GENE-060929-352	0.0293417	0.26135	0.228	0.067	1
ENSDARG00000021647	gnai1	guanine nucleotide binding protein (G protein), alpha inhibiting activity polypeptide 1 [Source:ZFIN;Acc:ZDB-GENE-040426-1310]	http://zfin.org/ZDB-GENE-040426-1310	http://zfin.org/ZDB-GENE-040426-1310	0.0142581	0.261776	0.746	0.5	1
ENSDARG00000031100	ivns1abpa	influenza virus NS1A binding protein a [Source:ZFIN;Acc:ZDB-GENE-031222-2]	http://zfin.org/ZDB-GENE-031222-2	http://zfin.org/ZDB-GENE-031222-2	0.000567175	0.26184	0.202	0.033	1
ENSDARG00000006181	hif1aa	hypoxia inducible factor 1, alpha subunit (basic helix-loop-helix transcription factor) a [Source:ZFIN;Acc:ZDB-GENE-080917-55]	http://zfin.org/ZDB-GENE-080917-55	http://zfin.org/ZDB-GENE-080917-55	0.00520357	0.262529	0.211	0.017	1
ENSDARG00000018069	rdh12	retinol dehydrogenase 12 (all-trans/9-cis/11-cis) [Source:ZFIN;Acc:ZDB-GENE-040718-9]	http://zfin.org/ZDB-GENE-040718-9	http://zfin.org/ZDB-GENE-040718-9	0.00526008	0.262623	0.561	0.3	1
ENSDARG00000010873	DDX17	si:dkey-156n14.5 [Source:ZFIN;Acc:ZDB-GENE-030131-18]	http://zfin.org/ZDB-GENE-030131-18	http://zfin.org/ZDB-GENE-030131-18	0.0156018	0.262952	0.307	0.1	1
ENSDARG00000036107	txnipa	thioredoxin interacting protein a [Source:ZFIN;Acc:ZDB-GENE-030804-10]	http://zfin.org/ZDB-GENE-030804-10	http://zfin.org/ZDB-GENE-030804-10	0.0987181	0.263068	0.711	0.55	1
ENSDARG00000055874	cpe	carboxypeptidase E [Source:ZFIN;Acc:ZDB-GENE-090313-68]	http://zfin.org/ZDB-GENE-090313-68	http://zfin.org/ZDB-GENE-090313-68	0.00105768	0.263603	0.342	0.183	1
ENSDARG00000104845	mipol1	mirror-image polydactyly 1 [Source:ZFIN;Acc:ZDB-GENE-030131-41]	http://zfin.org/ZDB-GENE-030131-41	http://zfin.org/ZDB-GENE-030131-41	5.12293e-05	0.264757	0.614	0.283	1
ENSDARG00000091609	spink4	serine peptidase inhibitor, Kazal type 4 [Source:ZFIN;Acc:ZDB-GENE-130821-1]	http://zfin.org/ZDB-GENE-130821-1	http://zfin.org/ZDB-GENE-130821-1	0.0014283	0.264941	0.193	0.05	1
ENSDARG00000098486	tollip	toll interacting protein [Source:ZFIN;Acc:ZDB-GENE-030131-8820]	http://zfin.org/ZDB-GENE-030131-8820	http://zfin.org/ZDB-GENE-030131-8820	0.0141168	0.265071	0.316	0.2	1
ENSDARG00000076745	zgc:193811	zgc:193811 [Source:ZFIN;Acc:ZDB-GENE-081022-43]	http://zfin.org/ZDB-GENE-081022-43	http://zfin.org/ZDB-GENE-081022-43	0.000212964	0.26516	0.237	0.067	1
ENSDARG00000104413	rogdi	rogdi homolog (Drosophila) [Source:ZFIN;Acc:ZDB-GENE-030131-7582]	http://zfin.org/ZDB-GENE-030131-7582	http://zfin.org/ZDB-GENE-030131-7582	0.00392982	0.265801	0.289	0.1	1
ENSDARG00000101074	glud1b	glutamate dehydrogenase 1b [Source:ZFIN;Acc:ZDB-GENE-030828-1]	http://zfin.org/ZDB-GENE-030828-1	http://zfin.org/ZDB-GENE-030828-1	0.000240045	0.265946	0.377	0.117	1
ENSDARG00000014914	lamp2	lysosomal-associated membrane protein 2 [Source:ZFIN;Acc:ZDB-GENE-030729-9]	http://zfin.org/ZDB-GENE-030729-9	http://zfin.org/ZDB-GENE-030729-9	1.04157e-07	0.266065	0.465	0.133	1
ENSDARG00000018145	mid1ip1l	MID1 interacting protein 1, like [Source:ZFIN;Acc:ZDB-GENE-030131-1697]	http://zfin.org/ZDB-GENE-030131-1697	http://zfin.org/ZDB-GENE-030131-1697	0.0392783	0.266084	0.281	0.1	1
ENSDARG00000013317	pygmb	phosphorylase, glycogen, muscle b [Source:ZFIN;Acc:ZDB-GENE-040426-1206]	http://zfin.org/ZDB-GENE-040426-1206	http://zfin.org/ZDB-GENE-040426-1206	0.00098878	0.266286	0.219	0.033	1
ENSDARG00000015349	mfge8a	milk fat globule-EGF factor 8 protein a [Source:ZFIN;Acc:ZDB-GENE-050327-9]	http://zfin.org/ZDB-GENE-050327-9	http://zfin.org/ZDB-GENE-050327-9	0.0452508	0.267534	0.149	0.017	1
ENSDARG00000102878	mapre3b	microtubule-associated protein, RP/EB family, member 3b [Source:ZFIN;Acc:ZDB-GENE-040704-6]	http://zfin.org/ZDB-GENE-040704-6	http://zfin.org/ZDB-GENE-040704-6	0.0332249	0.271652	0.307	0.133	1
ENSDARG00000078270	CU467961.1		http://zfin.org/	http://zfin.org/	0.0038128	0.272107	0.132	0	1
ENSDARG00000011665	aldoaa	aldolase a, fructose-bisphosphate, a [Source:ZFIN;Acc:ZDB-GENE-030131-8369]	http://zfin.org/ZDB-GENE-030131-8369	http://zfin.org/ZDB-GENE-030131-8369	0.00888499	0.272639	0.825	0.583	1
ENSDARG00000062593	stox1	storkhead box 1 [Source:ZFIN;Acc:ZDB-GENE-030925-2]	http://zfin.org/ZDB-GENE-030925-2	http://zfin.org/ZDB-GENE-030925-2	0.000586047	0.273258	0.421	0.15	1
ENSDARG00000093235	TST	zgc:162544 [Source:ZFIN;Acc:ZDB-GENE-030131-9020]	http://zfin.org/ZDB-GENE-030131-9020	http://zfin.org/ZDB-GENE-030131-9020	0.00327475	0.273284	0.36	0.133	1
ENSDARG00000086724	im:7151449	im:7151449 [Source:ZFIN;Acc:ZDB-GENE-041111-283]	http://zfin.org/ZDB-GENE-041111-283	http://zfin.org/ZDB-GENE-041111-283	0.00518474	0.273875	0.211	0.033	1
ENSDARG00000077492	atp8a2	ATPase, aminophospholipid transporter, class I, type 8A, member 2 [Source:ZFIN;Acc:ZDB-GENE-100209-2]	http://zfin.org/ZDB-GENE-100209-2	http://zfin.org/ZDB-GENE-100209-2	0.0784874	0.274525	0.333	0.167	1
ENSDARG00000075014	sqstm1	sequestosome 1 [Source:ZFIN;Acc:ZDB-GENE-040426-2204]	http://zfin.org/ZDB-GENE-040426-2204	http://zfin.org/ZDB-GENE-040426-2204	0.0102239	0.275118	0.763	0.517	1
ENSDARG00000100222	utrn	utrophin [Source:ZFIN;Acc:ZDB-GENE-070228-6]	http://zfin.org/ZDB-GENE-070228-6	http://zfin.org/ZDB-GENE-070228-6	0.010593	0.275417	0.184	0.017	1
ENSDARG00000031119	baiap2l1b	BAI1-associated protein 2-like 1b [Source:ZFIN;Acc:ZDB-GENE-050417-371]	http://zfin.org/ZDB-GENE-050417-371	http://zfin.org/ZDB-GENE-050417-371	0.0104548	0.275598	0.272	0.083	1
ENSDARG00000053217	cox7a2a	cytochrome c oxidase subunit VIIa polypeptide 2a (liver) [Source:ZFIN;Acc:ZDB-GENE-050522-153]	http://zfin.org/ZDB-GENE-050522-153	http://zfin.org/ZDB-GENE-050522-153	0.0176518	0.275683	0.965	0.867	1
ENSDARG00000045658	msrb3	methionine sulfoxide reductase B3 [Source:ZFIN;Acc:ZDB-GENE-040625-74]	http://zfin.org/ZDB-GENE-040625-74	http://zfin.org/ZDB-GENE-040625-74	0.0151327	0.27659	0.439	0.2	1
ENSDARG00000037433	fmr1	fragile X mental retardation 1 [Source:ZFIN;Acc:ZDB-GENE-020731-6]	http://zfin.org/ZDB-GENE-020731-6	http://zfin.org/ZDB-GENE-020731-6	0.000321602	0.276707	0.272	0.117	1
ENSDARG00000096954	si:dkeyp-67f1.1	si:dkeyp-67f1.1 [Source:ZFIN;Acc:ZDB-GENE-131127-559]	http://zfin.org/ZDB-GENE-131127-559	http://zfin.org/ZDB-GENE-131127-559	1.35108e-08	0.27711	0.272	0.017	1
ENSDARG00000054255	tctex1d2	Tctex1 domain containing 2 [Source:ZFIN;Acc:ZDB-GENE-081104-219]	http://zfin.org/ZDB-GENE-081104-219	http://zfin.org/ZDB-GENE-081104-219	0.0288217	0.277341	0.57	0.333	1
ENSDARG00000079119	si:ch211-229d2.5	si:ch211-229d2.5 [Source:ZFIN;Acc:ZDB-GENE-121214-200]	http://zfin.org/ZDB-GENE-121214-200	http://zfin.org/ZDB-GENE-121214-200	0.0217662	0.277804	0.737	0.617	1
ENSDARG00000032623	rcan3	regulator of calcineurin 3 [Source:ZFIN;Acc:ZDB-GENE-040718-445]	http://zfin.org/ZDB-GENE-040718-445	http://zfin.org/ZDB-GENE-040718-445	0.000263334	0.277812	0.658	0.333	1
ENSDARG00000092770	si:ch211-253p18.2	si:ch211-253p18.2 [Source:ZFIN;Acc:ZDB-GENE-041001-106]	http://zfin.org/ZDB-GENE-041001-106	http://zfin.org/ZDB-GENE-041001-106	0.0301718	0.278322	0.325	0.167	1
ENSDARG00000035596	ISCU (1 of many)	si:ch211-191d15.2 [Source:ZFIN;Acc:ZDB-GENE-040724-113]	http://zfin.org/ZDB-GENE-040724-113	http://zfin.org/ZDB-GENE-040724-113	0.000130809	0.278978	0.886	0.583	1
ENSDARG00000103545	tctex1d1	Tctex1 domain containing 1 [Source:ZFIN;Acc:ZDB-GENE-040912-49]	http://zfin.org/ZDB-GENE-040912-49	http://zfin.org/ZDB-GENE-040912-49	0.00313144	0.279515	0.667	0.4	1
ENSDARG00000078352	lyrm4	LYR motif containing 4 [Source:ZFIN;Acc:ZDB-GENE-081104-295]	http://zfin.org/ZDB-GENE-081104-295	http://zfin.org/ZDB-GENE-081104-295	0.000627941	0.280939	0.588	0.283	1
ENSDARG00000015575	cyp3c1	cytochrome P450, family 3, subfamily c, polypeptide 1 [Source:ZFIN;Acc:ZDB-GENE-030131-3060]	http://zfin.org/ZDB-GENE-030131-3060	http://zfin.org/ZDB-GENE-030131-3060	0.0246704	0.281636	0.404	0.183	1
ENSDARG00000071424	ap3d1	adaptor-related protein complex 3, delta 1 subunit [Source:ZFIN;Acc:ZDB-GENE-050208-437]	http://zfin.org/ZDB-GENE-050208-437	http://zfin.org/ZDB-GENE-050208-437	0.0303452	0.281795	0.596	0.367	1
ENSDARG00000058381	zgc:171775	zgc:171775 [Source:ZFIN;Acc:ZDB-GENE-030131-4309]	http://zfin.org/ZDB-GENE-030131-4309	http://zfin.org/ZDB-GENE-030131-4309	0.00330249	0.281937	0.667	0.383	1
ENSDARG00000060481	atl1	atlastin GTPase 1 [Source:ZFIN;Acc:ZDB-GENE-030131-8003]	http://zfin.org/ZDB-GENE-030131-8003	http://zfin.org/ZDB-GENE-030131-8003	0.0110455	0.281978	0.316	0.1	1
ENSDARG00000031683	fosab	v-fos FBJ murine osteosarcoma viral oncogene homolog Ab [Source:ZFIN;Acc:ZDB-GENE-031222-4]	http://zfin.org/ZDB-GENE-031222-4	http://zfin.org/ZDB-GENE-031222-4	3.96246e-05	0.283072	1	0.95	1
ENSDARG00000093594	CR536604.1		http://zfin.org/	http://zfin.org/	0.000985766	0.284203	0.158	0	1
ENSDARG00000090634	si:dkey-226k3.4	si:dkey-226k3.4 [Source:ZFIN;Acc:ZDB-GENE-031118-211]	http://zfin.org/ZDB-GENE-031118-211	http://zfin.org/ZDB-GENE-031118-211	0.00716155	0.284384	0.342	0.117	1
ENSDARG00000071585	si:dkeyp-110e4.11	si:dkeyp-110e4.11 [Source:ZFIN;Acc:ZDB-GENE-070424-267]	http://zfin.org/ZDB-GENE-070424-267	http://zfin.org/ZDB-GENE-070424-267	0.015324	0.286274	0.974	0.883	1
ENSDARG00000025350	prdx2	peroxiredoxin 2 [Source:ZFIN;Acc:ZDB-GENE-030326-2]	http://zfin.org/ZDB-GENE-030326-2	http://zfin.org/ZDB-GENE-030326-2	0.000334237	0.286472	1	0.967	1
ENSDARG00000075721	zdhhc6	zinc finger, DHHC-type containing 6 [Source:ZFIN;Acc:ZDB-GENE-030131-3189]	http://zfin.org/ZDB-GENE-030131-3189	http://zfin.org/ZDB-GENE-030131-3189	0.00807787	0.287159	0.386	0.15	1
ENSDARG00000069867	fam188b2	family with sequence similarity 188, member B2 [Source:ZFIN;Acc:ZDB-GENE-140127-1]	http://zfin.org/ZDB-GENE-140127-1	http://zfin.org/ZDB-GENE-140127-1	0.00258763	0.288459	0.263	0.05	1
ENSDARG00000077584	cln6a	ceroid-lipofuscinosis, neuronal 6a [Source:ZFIN;Acc:ZDB-GENE-041010-57]	http://zfin.org/ZDB-GENE-041010-57	http://zfin.org/ZDB-GENE-041010-57	0.000583698	0.289322	0.237	0.033	1
ENSDARG00000091996	si:ch211-117m20.5	si:ch211-117m20.5 [Source:ZFIN;Acc:ZDB-GENE-030131-12]	http://zfin.org/ZDB-GENE-030131-12	http://zfin.org/ZDB-GENE-030131-12	0.046914	0.289408	0.675	0.467	1
ENSDARG00000006760	slc24a3	solute carrier family 24 (sodium/potassium/calcium exchanger), member 3 [Source:ZFIN;Acc:ZDB-GENE-090312-67]	http://zfin.org/ZDB-GENE-090312-67	http://zfin.org/ZDB-GENE-090312-67	9.32006e-05	0.290566	0.202	0	1
ENSDARG00000031248	enkur	enkurin, TRPC channel interacting protein [Source:ZFIN;Acc:ZDB-GENE-070718-1]	http://zfin.org/ZDB-GENE-070718-1	http://zfin.org/ZDB-GENE-070718-1	3.11242e-09	0.291401	0.965	0.583	1
ENSDARG00000075830	syt3	synaptotagmin III [Source:ZFIN;Acc:ZDB-GENE-090601-1]	http://zfin.org/ZDB-GENE-090601-1	http://zfin.org/ZDB-GENE-090601-1	0.000389702	0.29145	0.175	0	1
ENSDARG00000097665	si:ch211-235m3.10	si:ch211-235m3.10 [Source:ZFIN;Acc:ZDB-GENE-131127-468]	http://zfin.org/ZDB-GENE-131127-468	http://zfin.org/ZDB-GENE-131127-468	3.49989e-05	0.292579	0.219	0	1
ENSDARG00000042936	fam228a	family with sequence similarity 228, member A [Source:ZFIN;Acc:ZDB-GENE-041014-83]	http://zfin.org/ZDB-GENE-041014-83	http://zfin.org/ZDB-GENE-041014-83	3.77775e-05	0.294017	0.772	0.417	1
ENSDARG00000032369	btbd6b	BTB (POZ) domain containing 6b [Source:ZFIN;Acc:ZDB-GENE-030829-65]	http://zfin.org/ZDB-GENE-030829-65	http://zfin.org/ZDB-GENE-030829-65	0.0142526	0.294158	0.553	0.3	1
ENSDARG00000018997	cplx2l	complexin 2, like [Source:ZFIN;Acc:ZDB-GENE-040718-160]	http://zfin.org/ZDB-GENE-040718-160	http://zfin.org/ZDB-GENE-040718-160	4.01875e-05	0.294505	0.211	0.05	1
ENSDARG00000100823	selk	selenoprotein K [Source:ZFIN;Acc:ZDB-GENE-040912-131]	http://zfin.org/ZDB-GENE-040912-131	http://zfin.org/ZDB-GENE-040912-131	1.1278e-05	0.294554	0.895	0.583	1
ENSDARG00000075172	fbxo25	F-box protein 25 [Source:ZFIN;Acc:ZDB-GENE-040801-19]	http://zfin.org/ZDB-GENE-040801-19	http://zfin.org/ZDB-GENE-040801-19	0.000298847	0.294683	0.228	0.033	1
ENSDARG00000045661	irf7	interferon regulatory factor 7 [Source:ZFIN;Acc:ZDB-GENE-040426-1518]	http://zfin.org/ZDB-GENE-040426-1518	http://zfin.org/ZDB-GENE-040426-1518	0.00050461	0.295088	0.202	0.033	1
ENSDARG00000009743	efhc1	EF-hand domain (C-terminal) containing 1 [Source:ZFIN;Acc:ZDB-GENE-040426-1300]	http://zfin.org/ZDB-GENE-040426-1300	http://zfin.org/ZDB-GENE-040426-1300	0.0113578	0.295206	0.412	0.183	1
ENSDARG00000012874	snap23.1	synaptosomal-associated protein 23.1 [Source:ZFIN;Acc:ZDB-GENE-040426-883]	http://zfin.org/ZDB-GENE-040426-883	http://zfin.org/ZDB-GENE-040426-883	0.00604071	0.29633	0.395	0.15	1
ENSDARG00000061845	si:dkeyp-110e4.6	si:dkeyp-110e4.6 [Source:ZFIN;Acc:ZDB-GENE-030219-75]	http://zfin.org/ZDB-GENE-030219-75	http://zfin.org/ZDB-GENE-030219-75	0.000117028	0.296608	0.333	0.083	1
ENSDARG00000076742	cyth1a	cytohesin 1a [Source:ZFIN;Acc:ZDB-GENE-030131-657]	http://zfin.org/ZDB-GENE-030131-657	http://zfin.org/ZDB-GENE-030131-657	0.00194028	0.297277	0.263	0.05	1
ENSDARG00000042548	tpd52l1	tumor protein D52-like 1 [Source:ZFIN;Acc:ZDB-GENE-050522-121]	http://zfin.org/ZDB-GENE-050522-121	http://zfin.org/ZDB-GENE-050522-121	0.000695477	0.299227	0.632	0.317	1
ENSDARG00000103699	ptpn13	protein tyrosine phosphatase, non-receptor type 13 [Source:ZFIN;Acc:ZDB-GENE-070410-72]	http://zfin.org/ZDB-GENE-070410-72	http://zfin.org/ZDB-GENE-070410-72	0.000597756	0.299407	0.368	0.117	1
ENSDARG00000011797	fam46bb	family with sequence similarity 46, member Bb [Source:ZFIN;Acc:ZDB-GENE-060503-431]	http://zfin.org/ZDB-GENE-060503-431	http://zfin.org/ZDB-GENE-060503-431	0.0428801	0.299866	0.623	0.45	1
ENSDARG00000062054	cpt1ab	carnitine palmitoyltransferase 1Ab (liver) [Source:ZFIN;Acc:ZDB-GENE-030131-3250]	http://zfin.org/ZDB-GENE-030131-3250	http://zfin.org/ZDB-GENE-030131-3250	0.00024314	0.300733	0.184	0	1
ENSDARG00000060921	pla2g6	phospholipase A2, group VI (cytosolic, calcium-independent) [Source:ZFIN;Acc:ZDB-GENE-040426-2079]	http://zfin.org/ZDB-GENE-040426-2079	http://zfin.org/ZDB-GENE-040426-2079	0.00582006	0.301432	0.395	0.15	1
ENSDARG00000099724	relt	RELT tumor necrosis factor receptor [Source:ZFIN;Acc:ZDB-GENE-040426-2361]	http://zfin.org/ZDB-GENE-040426-2361	http://zfin.org/ZDB-GENE-040426-2361	3.22767e-05	0.303385	0.526	0.2	1
ENSDARG00000002790	ap2m1a	adaptor-related protein complex 2, mu 1 subunit, a [Source:ZFIN;Acc:ZDB-GENE-030131-9784]	http://zfin.org/ZDB-GENE-030131-9784	http://zfin.org/ZDB-GENE-030131-9784	0.00301038	0.303747	0.895	0.667	1
ENSDARG00000054023	ttll6	tubulin tyrosine ligase-like family, member 6 [Source:ZFIN;Acc:ZDB-GENE-080107-1]	http://zfin.org/ZDB-GENE-080107-1	http://zfin.org/ZDB-GENE-080107-1	0.00937587	0.305045	0.289	0.1	1
ENSDARG00000062967	kcng4a	potassium voltage-gated channel, subfamily G, member 4a [Source:ZFIN;Acc:ZDB-GENE-050419-11]	http://zfin.org/ZDB-GENE-050419-11	http://zfin.org/ZDB-GENE-050419-11	0.000150921	0.305248	0.193	0	1
ENSDARG00000020746	gfi1aa	growth factor independent 1A transcription repressor a [Source:ZFIN;Acc:ZDB-GENE-050522-534]	http://zfin.org/ZDB-GENE-050522-534	http://zfin.org/ZDB-GENE-050522-534	0.00124265	0.305482	0.746	0.45	1
ENSDARG00000092895	si:dkey-188i13.11	si:dkey-188i13.11 [Source:ZFIN;Acc:ZDB-GENE-090313-209]	http://zfin.org/ZDB-GENE-090313-209	http://zfin.org/ZDB-GENE-090313-209	0.000450219	0.306343	0.404	0.133	1
ENSDARG00000060316	cish	cytokine inducible SH2-containing protein [Source:ZFIN;Acc:ZDB-GENE-050907-1]	http://zfin.org/ZDB-GENE-050907-1	http://zfin.org/ZDB-GENE-050907-1	0.0267679	0.306766	0.211	0.05	1
ENSDARG00000071360	morn2	MORN repeat containing 2 [Source:ZFIN;Acc:ZDB-GENE-060825-230]	http://zfin.org/ZDB-GENE-060825-230	http://zfin.org/ZDB-GENE-060825-230	0.000926219	0.307697	0.325	0.083	1
ENSDARG00000042630	hebp2	heme binding protein 2 [Source:ZFIN;Acc:ZDB-GENE-040426-914]	http://zfin.org/ZDB-GENE-040426-914	http://zfin.org/ZDB-GENE-040426-914	0.008294	0.307839	0.386	0.15	1
ENSDARG00000038025	cbx7a	chromobox homolog 7a [Source:ZFIN;Acc:ZDB-GENE-050417-400]	http://zfin.org/ZDB-GENE-050417-400	http://zfin.org/ZDB-GENE-050417-400	0.00266894	0.307928	0.342	0.1	1
ENSDARG00000028386	htatip2	HIV-1 Tat interactive protein 2 [Source:ZFIN;Acc:ZDB-GENE-001219-1]	http://zfin.org/ZDB-GENE-001219-1	http://zfin.org/ZDB-GENE-001219-1	2.70183e-05	0.308396	0.912	0.6	1
ENSDARG00000090981	si:ch211-191o15.6	si:ch211-191o15.6 [Source:ZFIN;Acc:ZDB-GENE-110228-3]	http://zfin.org/ZDB-GENE-110228-3	http://zfin.org/ZDB-GENE-110228-3	0.00155563	0.309006	0.149	0	1
ENSDARG00000013615	pbx3b	pre-B-cell leukemia homeobox 3b [Source:ZFIN;Acc:ZDB-GENE-000405-3]	http://zfin.org/ZDB-GENE-000405-3	http://zfin.org/ZDB-GENE-000405-3	2.03588e-05	0.309937	0.289	0.033	1
ENSDARG00000035870	laptm4b	lysosomal protein transmembrane 4 beta [Source:ZFIN;Acc:ZDB-GENE-030616-616]	http://zfin.org/ZDB-GENE-030616-616	http://zfin.org/ZDB-GENE-030616-616	0.00439496	0.30997	0.868	0.633	1
ENSDARG00000040245	kpnb3	karyopherin (importin) beta 3 [Source:ZFIN;Acc:ZDB-GENE-030424-2]	http://zfin.org/ZDB-GENE-030424-2	http://zfin.org/ZDB-GENE-030424-2	0.0172083	0.311405	0.43	0.2	1
ENSDARG00000101899	si:dkey-225f23.3	si:dkey-225f23.3 [Source:ZFIN;Acc:ZDB-GENE-070705-385]	http://zfin.org/ZDB-GENE-070705-385	http://zfin.org/ZDB-GENE-070705-385	5.72606e-05	0.312014	0.211	0	1
ENSDARG00000036426	zgc:103586	zgc:103586 [Source:ZFIN;Acc:ZDB-GENE-041114-88]	http://zfin.org/ZDB-GENE-041114-88	http://zfin.org/ZDB-GENE-041114-88	0.0337351	0.312369	0.386	0.183	1
ENSDARG00000016745	slc35f6	solute carrier family 35, member F6 [Source:ZFIN;Acc:ZDB-GENE-040718-297]	http://zfin.org/ZDB-GENE-040718-297	http://zfin.org/ZDB-GENE-040718-297	0.00210542	0.313094	0.386	0.167	1
ENSDARG00000063095	ctsf	cathepsin F [Source:ZFIN;Acc:ZDB-GENE-030131-9831]	http://zfin.org/ZDB-GENE-030131-9831	http://zfin.org/ZDB-GENE-030131-9831	0.0102056	0.314766	0.658	0.4	1
ENSDARG00000075714	si:dkey-27p23.3	si:dkey-27p23.3 [Source:ZFIN;Acc:ZDB-GENE-070705-453]	http://zfin.org/ZDB-GENE-070705-453	http://zfin.org/ZDB-GENE-070705-453	4.48108e-05	0.317496	0.728	0.367	1
ENSDARG00000075768	sdhb	succinate dehydrogenase complex, subunit B, iron sulfur (Ip) [Source:ZFIN;Acc:ZDB-GENE-030131-8005]	http://zfin.org/ZDB-GENE-030131-8005	http://zfin.org/ZDB-GENE-030131-8005	0.0186767	0.319633	0.658	0.483	1
ENSDARG00000074552	ndufs7	NADH dehydrogenase (ubiquinone) Fe-S protein 7, (NADH-coenzyme Q reductase) [Source:ZFIN;Acc:ZDB-GENE-041111-261]	http://zfin.org/ZDB-GENE-041111-261	http://zfin.org/ZDB-GENE-041111-261	7.47523e-05	0.321041	0.939	0.667	1
ENSDARG00000079046	RABL6 (1 of many)	RAB, member RAS oncogene family like 6 [Source:HGNC Symbol;Acc:HGNC:24703]	http://zfin.org/	http://zfin.org/	0.000632712	0.321214	0.289	0.067	1
ENSDARG00000089952	DYNLRB2	si:ch211-147k9.8 [Source:ZFIN;Acc:ZDB-GENE-120709-101]	http://zfin.org/ZDB-GENE-120709-101	http://zfin.org/ZDB-GENE-120709-101	0.000572345	0.323305	0.702	0.383	1
ENSDARG00000062978	ccdc151	coiled-coil domain containing 151 [Source:ZFIN;Acc:ZDB-GENE-061013-787]	http://zfin.org/ZDB-GENE-061013-787	http://zfin.org/ZDB-GENE-061013-787	0.000435483	0.32337	0.693	0.367	1
ENSDARG00000045618	clta	clathrin, light chain A [Source:ZFIN;Acc:ZDB-GENE-040426-1986]	http://zfin.org/ZDB-GENE-040426-1986	http://zfin.org/ZDB-GENE-040426-1986	4.35077e-05	0.324002	0.982	0.867	1
ENSDARG00000007823	atf3	activating transcription factor 3 [Source:ZFIN;Acc:ZDB-GENE-040426-728]	http://zfin.org/ZDB-GENE-040426-728	http://zfin.org/ZDB-GENE-040426-728	0.0287848	0.325408	0.246	0.117	1
ENSDARG00000074287	sptlc2b	serine palmitoyltransferase, long chain base subunit 2b [Source:ZFIN;Acc:ZDB-GENE-080305-8]	http://zfin.org/ZDB-GENE-080305-8	http://zfin.org/ZDB-GENE-080305-8	0.000898548	0.325587	0.553	0.25	1
ENSDARG00000011055	fbxo9	F-box protein 9 [Source:ZFIN;Acc:ZDB-GENE-030131-4194]	http://zfin.org/ZDB-GENE-030131-4194	http://zfin.org/ZDB-GENE-030131-4194	0.00492098	0.325917	0.325	0.1	1
ENSDARG00000101446	PCP4L1 (1 of many)	si:dkey-46i9.1 [Source:ZFIN;Acc:ZDB-GENE-141216-493]	http://zfin.org/ZDB-GENE-141216-493	http://zfin.org/ZDB-GENE-141216-493	0.103517	0.326522	0.149	0.033	1
ENSDARG00000068103	cfap45	cilia and flagella associated protein 45 [Source:ZFIN;Acc:ZDB-GENE-070209-143]	http://zfin.org/ZDB-GENE-070209-143	http://zfin.org/ZDB-GENE-070209-143	0.00907375	0.326677	0.491	0.233	1
ENSDARG00000013016	pole4	polymerase (DNA-directed), epsilon 4, accessory subunit [Source:ZFIN;Acc:ZDB-GENE-050522-309]	http://zfin.org/ZDB-GENE-050522-309	http://zfin.org/ZDB-GENE-050522-309	2.41602e-06	0.328976	0.667	0.283	1
ENSDARG00000095539	si:dkeyp-82a1.8	si:dkeyp-82a1.8 [Source:ZFIN;Acc:ZDB-GENE-081104-479]	http://zfin.org/ZDB-GENE-081104-479	http://zfin.org/ZDB-GENE-081104-479	2.10934e-08	0.330419	0.307	0.017	1
ENSDARG00000045888	acat1	acetyl-CoA acetyltransferase 1 [Source:ZFIN;Acc:ZDB-GENE-040808-68]	http://zfin.org/ZDB-GENE-040808-68	http://zfin.org/ZDB-GENE-040808-68	0.0202391	0.33045	0.623	0.417	1
ENSDARG00000039343	ahcyl2	adenosylhomocysteinase-like 2 [Source:ZFIN;Acc:ZDB-GENE-040115-5]	http://zfin.org/ZDB-GENE-040115-5	http://zfin.org/ZDB-GENE-040115-5	0.00025086	0.331052	0.333	0.067	1
ENSDARG00000010186	myo3a	myosin IIIA [Source:ZFIN;Acc:ZDB-GENE-041026-4]	http://zfin.org/ZDB-GENE-041026-4	http://zfin.org/ZDB-GENE-041026-4	0.000626856	0.331848	0.281	0.05	1
ENSDARG00000097485	cfap99	cilia and flagella associated protein 99 [Source:ZFIN;Acc:ZDB-GENE-161107-1]	http://zfin.org/ZDB-GENE-161107-1	http://zfin.org/ZDB-GENE-161107-1	0.00278356	0.332433	0.5	0.217	1
ENSDARG00000095457	si:ch211-147d7.5	si:ch211-147d7.5 [Source:ZFIN;Acc:ZDB-GENE-041014-353]	http://zfin.org/ZDB-GENE-041014-353	http://zfin.org/ZDB-GENE-041014-353	0.000240932	0.333548	0.746	0.417	1
ENSDARG00000102820	cib2	calcium and integrin binding family member 2 [Source:ZFIN;Acc:ZDB-GENE-040426-1663]	http://zfin.org/ZDB-GENE-040426-1663	http://zfin.org/ZDB-GENE-040426-1663	0.012373	0.335743	0.421	0.2	1
ENSDARG00000038306	tsc22d1	TSC22 domain family, member 1 [Source:ZFIN;Acc:ZDB-GENE-030131-7785]	http://zfin.org/ZDB-GENE-030131-7785	http://zfin.org/ZDB-GENE-030131-7785	3.41652e-05	0.336097	0.623	0.283	1
ENSDARG00000038694	REEP6	zgc:101744 [Source:ZFIN;Acc:ZDB-GENE-050320-111]	http://zfin.org/ZDB-GENE-050320-111	http://zfin.org/ZDB-GENE-050320-111	0.00197065	0.336324	0.667	0.367	1
ENSDARG00000079613	sall3a	spalt-like transcription factor 3a [Source:ZFIN;Acc:ZDB-GENE-020228-4]	http://zfin.org/ZDB-GENE-020228-4	http://zfin.org/ZDB-GENE-020228-4	0.000150921	0.336808	0.193	0	1
ENSDARG00000075993	clic5a	chloride intracellular channel 5a [Source:ZFIN;Acc:ZDB-GENE-041114-84]	http://zfin.org/ZDB-GENE-041114-84	http://zfin.org/ZDB-GENE-041114-84	0.000212838	0.337421	0.237	0.033	1
ENSDARG00000016143	xiap	X-linked inhibitor of apoptosis [Source:ZFIN;Acc:ZDB-GENE-030825-7]	http://zfin.org/ZDB-GENE-030825-7	http://zfin.org/ZDB-GENE-030825-7	0.00111432	0.34023	0.228	0.017	1
ENSDARG00000076094	klhl30	kelch-like family member 30 [Source:ZFIN;Acc:ZDB-GENE-100913-2]	http://zfin.org/ZDB-GENE-100913-2	http://zfin.org/ZDB-GENE-100913-2	0.00115506	0.340665	0.307	0.083	1
ENSDARG00000057378	fam213aa	family with sequence similarity 213, member Aa [Source:ZFIN;Acc:ZDB-GENE-030131-2459]	http://zfin.org/ZDB-GENE-030131-2459	http://zfin.org/ZDB-GENE-030131-2459	5.59524e-06	0.340694	0.737	0.35	1
ENSDARG00000093677	si:ch211-56a11.2	si:ch211-56a11.2 [Source:ZFIN;Acc:ZDB-GENE-091204-123]	http://zfin.org/ZDB-GENE-091204-123	http://zfin.org/ZDB-GENE-091204-123	0.00860725	0.341547	0.184	0.033	1
ENSDARG00000024967	fancg	Fanconi anemia, complementation group G [Source:ZFIN;Acc:ZDB-GENE-050417-103]	http://zfin.org/ZDB-GENE-050417-103	http://zfin.org/ZDB-GENE-050417-103	0.00234877	0.342166	0.298	0.067	1
ENSDARG00000098507	lyar	Ly1 antibody reactive homolog (mouse) [Source:ZFIN;Acc:ZDB-GENE-040426-1414]	http://zfin.org/ZDB-GENE-040426-1414	http://zfin.org/ZDB-GENE-040426-1414	0.0510731	0.342598	0.57	0.35	1
ENSDARG00000021787	abcb5	ATP-binding cassette, sub-family B (MDR/TAP), member 5 [Source:ZFIN;Acc:ZDB-GENE-030131-6414]	http://zfin.org/ZDB-GENE-030131-6414	http://zfin.org/ZDB-GENE-030131-6414	4.91617e-05	0.343981	0.36	0.117	1
ENSDARG00000054749	lmo4b	LIM domain only 4b [Source:ZFIN;Acc:ZDB-GENE-030131-3570]	http://zfin.org/ZDB-GENE-030131-3570	http://zfin.org/ZDB-GENE-030131-3570	0.000118005	0.345799	0.368	0.167	1
ENSDARG00000067831	tbata	thymus, brain and testes associated [Source:ZFIN;Acc:ZDB-GENE-121030-4]	http://zfin.org/ZDB-GENE-121030-4	http://zfin.org/ZDB-GENE-121030-4	0.00564515	0.346228	0.386	0.15	1
ENSDARG00000004211	ccdc106a	coiled-coil domain containing 106a [Source:ZFIN;Acc:ZDB-GENE-050220-4]	http://zfin.org/ZDB-GENE-050220-4	http://zfin.org/ZDB-GENE-050220-4	0.000437676	0.348037	0.43	0.133	1
ENSDARG00000082753	AC024175.17		http://zfin.org/	http://zfin.org/	0.0205039	0.35039	0.272	0.083	1
ENSDARG00000089109	bcl2b	B-cell CLL/lymphoma 2b [Source:ZFIN;Acc:ZDB-GENE-110411-185]	http://zfin.org/ZDB-GENE-110411-185	http://zfin.org/ZDB-GENE-110411-185	2.07623e-05	0.35144	0.298	0.017	1
ENSDARG00000056627	cxcl14	chemokine (C-X-C motif) ligand 14 [Source:ZFIN;Acc:ZDB-GENE-000619-1]	http://zfin.org/ZDB-GENE-000619-1	http://zfin.org/ZDB-GENE-000619-1	0.0578255	0.351792	0.544	0.45	1
ENSDARG00000045302	smpx	small muscle protein, X-linked [Source:ZFIN;Acc:ZDB-GENE-040704-24]	http://zfin.org/ZDB-GENE-040704-24	http://zfin.org/ZDB-GENE-040704-24	9.23821e-06	0.351795	0.772	0.4	1
ENSDARG00000089802	akap1a	A kinase (PRKA) anchor protein 1a [Source:ZFIN;Acc:ZDB-GENE-030131-5980]	http://zfin.org/ZDB-GENE-030131-5980	http://zfin.org/ZDB-GENE-030131-5980	0.000361712	0.352075	0.254	0.017	1
ENSDARG00000071567	TSTD1	si:dkey-34l15.1 [Source:ZFIN;Acc:ZDB-GENE-081107-63]	http://zfin.org/ZDB-GENE-081107-63	http://zfin.org/ZDB-GENE-081107-63	7.96334e-05	0.35212	0.912	0.667	1
ENSDARG00000101115	med30	mediator complex subunit 30 [Source:ZFIN;Acc:ZDB-GENE-040426-1676]	http://zfin.org/ZDB-GENE-040426-1676	http://zfin.org/ZDB-GENE-040426-1676	0.000310738	0.35259	0.386	0.1	1
ENSDARG00000026582	iscub	iron-sulfur cluster assembly enzyme b [Source:ZFIN;Acc:ZDB-GENE-050417-332]	http://zfin.org/ZDB-GENE-050417-332	http://zfin.org/ZDB-GENE-050417-332	0.00361128	0.353489	0.456	0.2	1
ENSDARG00000057016	cdc14ab	cell division cycle 14Ab [Source:ZFIN;Acc:ZDB-GENE-070705-309]	http://zfin.org/ZDB-GENE-070705-309	http://zfin.org/ZDB-GENE-070705-309	0.00462706	0.353777	0.36	0.117	1
ENSDARG00000021059	alas1	aminolevulinate, delta-, synthase 1 [Source:ZFIN;Acc:ZDB-GENE-001229-2]	http://zfin.org/ZDB-GENE-001229-2	http://zfin.org/ZDB-GENE-001229-2	0.00118085	0.355034	0.5	0.2	1
ENSDARG00000044092	atpif1b	ATPase inhibitory factor 1b [Source:ZFIN;Acc:ZDB-GENE-050506-113]	http://zfin.org/ZDB-GENE-050506-113	http://zfin.org/ZDB-GENE-050506-113	0.000655112	0.355452	0.886	0.633	1
ENSDARG00000069361	spa17	sperm autoantigenic protein 17 [Source:ZFIN;Acc:ZDB-GENE-061027-337]	http://zfin.org/ZDB-GENE-070112-1912	http://zfin.org/ZDB-GENE-070112-1912	1.76627e-07	0.357039	0.781	0.35	1
ENSDARG00000039963	fgfbp1b	fibroblast growth factor binding protein 1b [Source:ZFIN;Acc:ZDB-GENE-081106-1]	http://zfin.org/ZDB-GENE-081106-1	http://zfin.org/ZDB-GENE-081106-1	0.00314436	0.358409	0.149	0.033	1
ENSDARG00000070097	vimp	VCP-interacting membrane selenoprotein [Source:ZFIN;Acc:ZDB-GENE-060804-1]	http://zfin.org/ZDB-GENE-060804-1	http://zfin.org/ZDB-GENE-060804-1	8.48398e-05	0.359055	0.386	0.167	1
ENSDARG00000020798	necap1	NECAP endocytosis associated 1 [Source:ZFIN;Acc:ZDB-GENE-040426-1682]	http://zfin.org/ZDB-GENE-040426-1682	http://zfin.org/ZDB-GENE-040426-1682	8.81528e-05	0.359886	0.702	0.35	1
ENSDARG00000063310	oxr1b	oxidation resistance 1b [Source:ZFIN;Acc:ZDB-GENE-030131-2438]	http://zfin.org/ZDB-GENE-030131-2438	http://zfin.org/ZDB-GENE-030131-2438	1.28731e-05	0.360485	0.237	0	1
ENSDARG00000035880	atp6v1c1b	ATPase, H+ transporting, lysosomal, V1 subunit C1b [Source:ZFIN;Acc:ZDB-GENE-041010-104]	http://zfin.org/ZDB-GENE-041010-104	http://zfin.org/ZDB-GENE-041010-104	0.00152427	0.360518	0.561	0.267	1
ENSDARG00000033285	gsto2	glutathione S-transferase omega 2 [Source:ZFIN;Acc:ZDB-GENE-041114-67]	http://zfin.org/ZDB-GENE-041114-67	http://zfin.org/ZDB-GENE-041114-67	0.000139627	0.360601	0.93	0.667	1
ENSDARG00000098112	btc	betacellulin, epidermal growth factor family member [Source:ZFIN;Acc:ZDB-GENE-050311-1]	http://zfin.org/ZDB-GENE-050311-1	http://zfin.org/ZDB-GENE-050311-1	0.000150623	0.361448	0.754	0.417	1
ENSDARG00000056458	lhfpl5b	lipoma HMGIC fusion partner-like 5b [Source:ZFIN;Acc:ZDB-GENE-080220-51]	http://zfin.org/ZDB-GENE-080220-51	http://zfin.org/ZDB-GENE-080220-51	4.49353e-07	0.362301	0.842	0.45	1
ENSDARG00000032997	rnf185	ring finger protein 185 [Source:ZFIN;Acc:ZDB-GENE-040426-1977]	http://zfin.org/ZDB-GENE-040426-1977	http://zfin.org/ZDB-GENE-040426-1977	0.000102037	0.362616	0.588	0.25	1
ENSDARG00000097959	si:dkey-248g15.3	si:dkey-248g15.3 [Source:ZFIN;Acc:ZDB-GENE-131127-95]	http://zfin.org/ZDB-GENE-131127-95	http://zfin.org/ZDB-GENE-131127-95	0.0155208	0.365016	0.439	0.2	1
ENSDARG00000074323	efcab2	EF-hand calcium binding domain 2 [Source:ZFIN;Acc:ZDB-GENE-070521-5]	http://zfin.org/ZDB-GENE-070521-5	http://zfin.org/ZDB-GENE-070521-5	0.0154382	0.365262	0.526	0.283	1
ENSDARG00000011498	si:ch211-212o1.2	si:ch211-212o1.2 [Source:ZFIN;Acc:ZDB-GENE-041111-310]	http://zfin.org/ZDB-GENE-041111-310	http://zfin.org/ZDB-GENE-041111-310	0.00306763	0.36543	0.5	0.217	1
ENSDARG00000036102	ctdsp2	CTD (carboxy-terminal domain, RNA polymerase II, polypeptide A) small phosphatase 2 [Source:ZFIN;Acc:ZDB-GENE-030131-184]	http://zfin.org/ZDB-GENE-030131-184	http://zfin.org/ZDB-GENE-030131-184	0.00189748	0.365963	0.368	0.133	1
ENSDARG00000103736	gramd2a	GRAM domain containing 2a [Source:ZFIN;Acc:ZDB-GENE-040724-9]	http://zfin.org/ZDB-GENE-040724-9	http://zfin.org/ZDB-GENE-040724-9	2.44731e-07	0.367954	0.439	0.083	1
ENSDARG00000006397	laptm4a	lysosomal protein transmembrane 4 alpha [Source:ZFIN;Acc:ZDB-GENE-030131-1024]	http://zfin.org/ZDB-GENE-030131-1024	http://zfin.org/ZDB-GENE-030131-1024	0.0007031	0.369368	0.719	0.4	1
ENSDARG00000009418	mef2cb	myocyte enhancer factor 2cb [Source:ZFIN;Acc:ZDB-GENE-040901-7]	http://zfin.org/ZDB-GENE-040901-7	http://zfin.org/ZDB-GENE-040901-7	0.00142873	0.372035	0.237	0.05	1
ENSDARG00000022456	eno1a	enolase 1a, (alpha) [Source:ZFIN;Acc:ZDB-GENE-030131-6048]	http://zfin.org/ZDB-GENE-030131-6048	http://zfin.org/ZDB-GENE-030131-6048	5.40524e-05	0.372193	0.86	0.55	1
ENSDARG00000104945	sncb	synuclein, beta [Source:ZFIN;Acc:ZDB-GENE-040426-1615]	http://zfin.org/ZDB-GENE-040426-1615	http://zfin.org/ZDB-GENE-040426-1615	1.43555e-06	0.372398	0.947	0.617	1
ENSDARG00000099134	zgc:195356	zgc:195356 [Source:ZFIN;Acc:ZDB-GENE-030131-6619]	http://zfin.org/ZDB-GENE-030131-6619	http://zfin.org/ZDB-GENE-030131-6619	0.0224195	0.373344	0.14	0.017	1
ENSDARG00000002509	zgc:153911	zgc:153911 [Source:ZFIN;Acc:ZDB-GENE-061013-174]	http://zfin.org/ZDB-GENE-061013-174	http://zfin.org/ZDB-GENE-061013-174	0.00108367	0.373866	0.518	0.217	1
ENSDARG00000079781	slitrk4	SLIT and NTRK-like family, member 4 [Source:ZFIN;Acc:ZDB-GENE-140303-1]	http://zfin.org/ZDB-GENE-140303-1	http://zfin.org/ZDB-GENE-140303-1	4.4204e-05	0.375595	0.333	0.05	1
ENSDARG00000004874	spata6l	spermatogenesis associated 6-like [Source:ZFIN;Acc:ZDB-GENE-040426-1369]	http://zfin.org/ZDB-GENE-040426-1369	http://zfin.org/ZDB-GENE-040426-1369	0.000539662	0.375641	0.439	0.167	1
ENSDARG00000071560	dlx4b	distal-less homeobox 4b [Source:ZFIN;Acc:ZDB-GENE-990415-50]	http://zfin.org/ZDB-GENE-990415-50	http://zfin.org/ZDB-GENE-990415-50	0.0442218	0.375867	0.342	0.167	1
ENSDARG00000068214	ccni	cyclin I [Source:ZFIN;Acc:ZDB-GENE-040426-2898]	http://zfin.org/ZDB-GENE-040426-2898	http://zfin.org/ZDB-GENE-040426-2898	0.000337559	0.376899	0.825	0.55	1
ENSDARG00000020107	usp2a	ubiquitin specific peptidase 2a [Source:ZFIN;Acc:ZDB-GENE-041212-59]	http://zfin.org/ZDB-GENE-041212-59	http://zfin.org/ZDB-GENE-041212-59	9.83728e-05	0.379185	0.333	0.05	1
ENSDARG00000104139	atp1a3b	ATPase, Na+/K+ transporting, alpha 3b polypeptide [Source:ZFIN;Acc:ZDB-GENE-001212-8]	http://zfin.org/ZDB-GENE-001212-8	http://zfin.org/ZDB-GENE-001212-8	8.533e-05	0.37954	0.833	0.5	1
ENSDARG00000091889	CR812481.1		http://zfin.org/	http://zfin.org/	0.000244119	0.379593	0.263	0.017	1
ENSDARG00000052343	spata18	spermatogenesis associated 18 [Source:ZFIN;Acc:ZDB-GENE-050522-306]	http://zfin.org/ZDB-GENE-050522-306	http://zfin.org/ZDB-GENE-050522-306	4.12239e-07	0.379941	0.316	0.033	1
ENSDARG00000040277	fbxo32	F-box protein 32 [Source:ZFIN;Acc:ZDB-GENE-040426-1040]	http://zfin.org/ZDB-GENE-040426-1040	http://zfin.org/ZDB-GENE-040426-1040	6.3771e-06	0.380269	0.254	0.033	1
ENSDARG00000035470	sh3glb2b	SH3-domain GRB2-like endophilin B2b [Source:ZFIN;Acc:ZDB-GENE-040426-833]	http://zfin.org/ZDB-GENE-040426-833	http://zfin.org/ZDB-GENE-040426-833	1.2658e-06	0.380428	0.939	0.6	1
ENSDARG00000098635	irf2bp2b	interferon regulatory factor 2 binding protein 2b [Source:ZFIN;Acc:ZDB-GENE-040426-2574]	http://zfin.org/ZDB-GENE-040426-2574	http://zfin.org/ZDB-GENE-040426-2574	0.000564681	0.380532	0.781	0.483	1
ENSDARG00000052537	cptp	ceramide-1-phosphate transfer protein [Source:ZFIN;Acc:ZDB-GENE-040801-240]	http://zfin.org/ZDB-GENE-040801-240	http://zfin.org/ZDB-GENE-040801-240	5.09084e-07	0.380611	0.351	0.033	1
ENSDARG00000069363	zgc:153142	zgc:153142 [Source:ZFIN;Acc:ZDB-GENE-061013-507]	http://zfin.org/ZDB-GENE-061013-507	http://zfin.org/ZDB-GENE-061013-507	1.31766e-07	0.381294	0.386	0.05	1
ENSDARG00000092489	si:ch73-103b9.2	si:ch73-103b9.2 [Source:ZFIN;Acc:ZDB-GENE-070705-199]	http://zfin.org/ZDB-GENE-070705-199	http://zfin.org/ZDB-GENE-070705-199	0.00573048	0.382159	0.377	0.133	1
ENSDARG00000016623	si:ch211-195b13.1	si:ch211-195b13.1 [Source:ZFIN;Acc:ZDB-GENE-030131-7626]	http://zfin.org/ZDB-GENE-030131-7626	http://zfin.org/ZDB-GENE-030131-7626	0.000951809	0.384878	0.754	0.45	1
ENSDARG00000071871	glod5	glyoxalase domain containing 5 [Source:ZFIN;Acc:ZDB-GENE-050522-174]	http://zfin.org/ZDB-GENE-050522-174	http://zfin.org/ZDB-GENE-050522-174	0.000442986	0.3853	0.798	0.5	1
ENSDARG00000075866	cdcp2	CUB domain containing protein 2 [Source:ZFIN;Acc:ZDB-GENE-070705-485]	http://zfin.org/ZDB-GENE-070705-485	http://zfin.org/ZDB-GENE-070705-485	0.00302495	0.385512	0.456	0.2	1
ENSDARG00000043257	ckbb	creatine kinase, brain b [Source:ZFIN;Acc:ZDB-GENE-020103-2]	http://zfin.org/ZDB-GENE-020103-2	http://zfin.org/ZDB-GENE-020103-2	0.0219492	0.386352	0.465	0.317	1
ENSDARG00000060933	baiap2l2b	BAI1-associated protein 2-like 2b [Source:ZFIN;Acc:ZDB-GENE-060503-339]	http://zfin.org/ZDB-GENE-060503-339	http://zfin.org/ZDB-GENE-060503-339	2.8138e-05	0.387946	0.561	0.2	1
ENSDARG00000054578	arl6ip1	ADP-ribosylation factor-like 6 interacting protein 1 [Source:ZFIN;Acc:ZDB-GENE-040426-1087]	http://zfin.org/ZDB-GENE-040426-1087	http://zfin.org/ZDB-GENE-040426-1087	6.29032e-05	0.38837	0.904	0.633	1
ENSDARG00000091625	si:dkeyp-67f1.2	si:dkeyp-67f1.2 [Source:ZFIN;Acc:ZDB-GENE-050809-90]	http://zfin.org/ZDB-GENE-050809-90	http://zfin.org/ZDB-GENE-050809-90	4.63631e-06	0.38838	0.254	0	1
ENSDARG00000101251	ldha	lactate dehydrogenase A4 [Source:ZFIN;Acc:ZDB-GENE-991026-5]	http://zfin.org/ZDB-GENE-991026-5	http://zfin.org/ZDB-GENE-991026-5	1.12904e-07	0.388549	0.386	0.05	1
ENSDARG00000040730	wdr75	WD repeat domain 75 [Source:ZFIN;Acc:ZDB-GENE-030616-5]	http://zfin.org/ZDB-GENE-030616-5	http://zfin.org/ZDB-GENE-030616-5	0.00349413	0.389549	0.211	0.05	1
ENSDARG00000014907	htra1b	HtrA serine peptidase 1b [Source:ZFIN;Acc:ZDB-GENE-080219-7]	http://zfin.org/ZDB-GENE-080219-7	http://zfin.org/ZDB-GENE-080219-7	9.1691e-05	0.389737	0.36	0.067	1
ENSDARG00000104458	rnasekb	ribonuclease, RNase K b [Source:ZFIN;Acc:ZDB-GENE-060825-160]	http://zfin.org/ZDB-GENE-060825-160	http://zfin.org/ZDB-GENE-060825-160	2.16397e-05	0.389841	0.965	0.733	1
ENSDARG00000035560	capga	capping protein (actin filament), gelsolin-like a [Source:ZFIN;Acc:ZDB-GENE-060531-6]	http://zfin.org/ZDB-GENE-060531-6	http://zfin.org/ZDB-GENE-060531-6	5.72606e-05	0.390219	0.211	0	1
ENSDARG00000103764	gdnfb	glial cell derived neurotrophic factor b [Source:ZFIN;Acc:ZDB-GENE-110609-2]	http://zfin.org/ZDB-GENE-110609-2	http://zfin.org/ZDB-GENE-110609-2	0.00288062	0.390443	0.211	0.017	1
ENSDARG00000053315	tmprss3a	transmembrane protease, serine 3a [Source:ZFIN;Acc:ZDB-GENE-070912-70]	http://zfin.org/ZDB-GENE-070912-70	http://zfin.org/ZDB-GENE-070912-70	2.23819e-06	0.390824	0.711	0.3	1
ENSDARG00000095347	si:dkeyp-72h1.1	si:dkeyp-72h1.1 [Source:ZFIN;Acc:ZDB-GENE-050208-447]	http://zfin.org/ZDB-GENE-050208-447	http://zfin.org/ZDB-GENE-050208-447	0.00112255	0.391614	0.228	0.017	1
ENSDARG00000060610	pcdh7b	protocadherin 7b [Source:ZFIN;Acc:ZDB-GENE-081104-299]	http://zfin.org/ZDB-GENE-081104-299	http://zfin.org/ZDB-GENE-081104-299	0.000622867	0.392006	0.289	0.05	1
ENSDARG00000038359	enosf1	enolase superfamily member 1 [Source:ZFIN;Acc:ZDB-GENE-060929-780]	http://zfin.org/ZDB-GENE-060929-780	http://zfin.org/ZDB-GENE-060929-780	0.000762557	0.39311	0.474	0.2	1
ENSDARG00000054680	chrna9	cholinergic receptor, nicotinic, alpha 9 [Source:ZFIN;Acc:ZDB-GENE-090312-63]	http://zfin.org/ZDB-GENE-090312-63	http://zfin.org/ZDB-GENE-090312-63	0.000250088	0.394307	0.605	0.267	1
ENSDARG00000031768	roraa	RAR-related orphan receptor A, paralog a [Source:ZFIN;Acc:ZDB-GENE-060306-2]	http://zfin.org/ZDB-GENE-060306-2	http://zfin.org/ZDB-GENE-060306-2	0.000119559	0.395365	0.272	0.017	1
ENSDARG00000056966	nek7	NIMA-related kinase 7 [Source:ZFIN;Acc:ZDB-GENE-040801-136]	http://zfin.org/ZDB-GENE-040801-136	http://zfin.org/ZDB-GENE-040801-136	0.00161619	0.396681	0.439	0.183	1
ENSDARG00000018627	arl5a	ADP-ribosylation factor-like 5A [Source:ZFIN;Acc:ZDB-GENE-040718-28]	http://zfin.org/ZDB-GENE-040718-28	http://zfin.org/ZDB-GENE-040718-28	0.00044147	0.396714	0.43	0.15	1
ENSDARG00000028899	tekt4	tektin 4 [Source:ZFIN;Acc:ZDB-GENE-070410-98]	http://zfin.org/ZDB-GENE-070410-98	http://zfin.org/ZDB-GENE-070410-98	3.78966e-06	0.398642	0.737	0.333	1
ENSDARG00000020581	otofb	otoferlin b [Source:ZFIN;Acc:ZDB-GENE-110406-5]	http://zfin.org/ZDB-GENE-110406-5	http://zfin.org/ZDB-GENE-110406-5	6.56823e-21	0.398999	1	0.817	1
ENSDARG00000094300	NUPR2	si:ch211-160e1.5 [Source:ZFIN;Acc:ZDB-GENE-070705-255]	http://zfin.org/ZDB-GENE-070705-255	http://zfin.org/ZDB-GENE-070705-255	0.000132696	0.399565	0.763	0.417	1
ENSDARG00000030311	tmc2b	transmembrane channel-like 2b [Source:ZFIN;Acc:ZDB-GENE-060526-262]	http://zfin.org/ZDB-GENE-060526-262	http://zfin.org/ZDB-GENE-060526-262	1.31888e-07	0.402375	0.904	0.5	1
ENSDARG00000104018	mtpn	myotrophin [Source:ZFIN;Acc:ZDB-GENE-040426-2166]	http://zfin.org/ZDB-GENE-040426-2166	http://zfin.org/ZDB-GENE-040426-2166	2.97999e-05	0.403659	0.912	0.633	1
ENSDARG00000022983	ccdc28a	coiled-coil domain containing 28A [Source:ZFIN;Acc:ZDB-GENE-030131-5007]	http://zfin.org/ZDB-GENE-030131-5007	http://zfin.org/ZDB-GENE-030131-5007	1.12616e-07	0.406413	0.474	0.1	1
ENSDARG00000099464	FAM19A2	family with sequence similarity 19 member A2, C-C motif chemokine like [Source:HGNC Symbol;Acc:HGNC:21589]	http://zfin.org/	http://zfin.org/	0.0230944	0.407469	0.158	0.017	1
ENSDARG00000059057	atpv0e2	ATPase, H+ transporting V0 subunit e2 [Source:ZFIN;Acc:ZDB-GENE-050522-135]	http://zfin.org/ZDB-GENE-050522-135	http://zfin.org/ZDB-GENE-050522-135	0.000107707	0.413399	0.439	0.117	1
ENSDARG00000043493	cltca	clathrin, heavy chain a (Hc) [Source:ZFIN;Acc:ZDB-GENE-030131-2299]	http://zfin.org/ZDB-GENE-030131-2299	http://zfin.org/ZDB-GENE-030131-2299	0.00028763	0.414158	0.482	0.217	1
ENSDARG00000075515	CD37	zgc:171713 [Source:ZFIN;Acc:ZDB-GENE-070820-17]	http://zfin.org/ZDB-GENE-070820-17	http://zfin.org/ZDB-GENE-070820-17	2.24196e-08	0.415651	0.746	0.3	1
ENSDARG00000104068	gstp1	glutathione S-transferase pi 1 [Source:ZFIN;Acc:ZDB-GENE-020806-4]	http://zfin.org/ZDB-GENE-020806-4	http://zfin.org/ZDB-GENE-020806-4	2.86769e-12	0.41845	1	0.967	1
ENSDARG00000100639	CR847939.1		http://zfin.org/	http://zfin.org/	0.00821159	0.419166	0.456	0.217	1
ENSDARG00000068122	cfap77	cilia and flagella associated protein 77 [Source:ZFIN;Acc:ZDB-GENE-060526-106]	http://zfin.org/ZDB-GENE-060526-106	http://zfin.org/ZDB-GENE-060526-106	1.2466e-05	0.419624	0.518	0.15	1
ENSDARG00000071384	slc7a11	solute carrier family 7 (anionic amino acid transporter light chain, xc- system), member 11 [Source:ZFIN;Acc:ZDB-GENE-150416-1]	http://zfin.org/ZDB-GENE-150416-1	http://zfin.org/ZDB-GENE-150416-1	0.000269716	0.420672	0.316	0.05	1
ENSDARG00000002445	prdm1a	PR domain containing 1a, with ZNF domain [Source:ZFIN;Acc:ZDB-GENE-030131-2193]	http://zfin.org/ZDB-GENE-030131-2193	http://zfin.org/ZDB-GENE-030131-2193	0.00237954	0.421875	0.658	0.367	1
ENSDARG00000102123	phtf2	putative homeodomain transcription factor 2 [Source:ZFIN;Acc:ZDB-GENE-040711-4]	http://zfin.org/ZDB-GENE-040711-4	http://zfin.org/ZDB-GENE-040711-4	0.000494889	0.423751	0.623	0.3	1
ENSDARG00000052923	zgc:113162	zgc:113162 [Source:ZFIN;Acc:ZDB-GENE-050522-530]	http://zfin.org/ZDB-GENE-050522-530	http://zfin.org/ZDB-GENE-050522-530	4.08991e-05	0.425787	0.342	0.05	1
ENSDARG00000071196	sdprb	serum deprivation response b [Source:ZFIN;Acc:ZDB-GENE-040912-149]	http://zfin.org/ZDB-GENE-040912-149	http://zfin.org/ZDB-GENE-040912-149	0.000406778	0.426205	0.439	0.133	1
ENSDARG00000061817	kif1aa	kinesin family member 1Aa [Source:ZFIN;Acc:ZDB-GENE-100913-3]	http://zfin.org/ZDB-GENE-100913-3	http://zfin.org/ZDB-GENE-100913-3	6.22258e-06	0.426522	0.807	0.417	1
ENSDARG00000016238	arl6ip5b	ADP-ribosylation factor-like 6 interacting protein 5b [Source:ZFIN;Acc:ZDB-GENE-040718-223]	http://zfin.org/ZDB-GENE-040718-223	http://zfin.org/ZDB-GENE-040718-223	3.74243e-05	0.426684	0.605	0.233	1
ENSDARG00000087556	pacrg	PARK2 co-regulated [Source:ZFIN;Acc:ZDB-GENE-041114-100]	http://zfin.org/ZDB-GENE-041114-100	http://zfin.org/ZDB-GENE-041114-100	7.6785e-07	0.42929	0.772	0.35	1
ENSDARG00000101888	OSCP1 (1 of many)	organic solute carrier partner 1 [Source:HGNC Symbol;Acc:HGNC:29971]	http://zfin.org/	http://zfin.org/	0.000569828	0.431498	0.351	0.083	1
ENSDARG00000027744	gadd45ba	growth arrest and DNA-damage-inducible, beta a [Source:ZFIN;Acc:ZDB-GENE-040426-1971]	http://zfin.org/ZDB-GENE-040426-1971	http://zfin.org/ZDB-GENE-040426-1971	0.00115592	0.432012	0.5	0.25	1
ENSDARG00000103983	slc30a10	solute carrier family 30, member 10 [Source:ZFIN;Acc:ZDB-GENE-060608-2]	http://zfin.org/ZDB-GENE-060608-2	http://zfin.org/ZDB-GENE-060608-2	0.000441182	0.434285	0.763	0.483	1
ENSDARG00000008310	ip6k2a	inositol hexakisphosphate kinase 2a [Source:ZFIN;Acc:ZDB-GENE-030131-760]	http://zfin.org/ZDB-GENE-030131-760	http://zfin.org/ZDB-GENE-030131-760	0.00057623	0.434389	0.64	0.317	1
ENSDARG00000016483	baiap2l2a	BAI1-associated protein 2-like 2a [Source:ZFIN;Acc:ZDB-GENE-040108-10]	http://zfin.org/ZDB-GENE-040108-10	http://zfin.org/ZDB-GENE-040108-10	6.14101e-06	0.434477	0.342	0.033	1
ENSDARG00000013928	plekhb2	pleckstrin homology domain containing, family B (evectins) member 2 [Source:ZFIN;Acc:ZDB-GENE-040426-754]	http://zfin.org/ZDB-GENE-040426-754	http://zfin.org/ZDB-GENE-040426-754	0.000196157	0.434942	0.623	0.333	1
ENSDARG00000093448	mpc1	mitochondrial pyruvate carrier 1 [Source:ZFIN;Acc:ZDB-GENE-040718-94]	http://zfin.org/ZDB-GENE-040718-94	http://zfin.org/ZDB-GENE-040718-94	0.000296353	0.435652	0.851	0.567	1
ENSDARG00000019098	cd82a	CD82 molecule a [Source:ZFIN;Acc:ZDB-GENE-030131-2818]	http://zfin.org/ZDB-GENE-030131-2818	http://zfin.org/ZDB-GENE-030131-2818	9.34136e-06	0.439859	0.298	0.033	1
ENSDARG00000030694	atp6v1e1b	ATPase, H+ transporting, lysosomal, V1 subunit E1b [Source:ZFIN;Acc:ZDB-GENE-020419-11]	http://zfin.org/ZDB-GENE-020419-11	http://zfin.org/ZDB-GENE-020419-11	2.22097e-05	0.444386	0.886	0.567	1
ENSDARG00000074638	loxhd1b	lipoxygenase homology domains 1b [Source:ZFIN;Acc:ZDB-GENE-081104-370]	http://zfin.org/ZDB-GENE-081104-370	http://zfin.org/ZDB-GENE-081104-370	2.76017e-06	0.446792	0.263	0	1
ENSDARG00000014763	arf2a	ADP-ribosylation factor 2a [Source:ZFIN;Acc:ZDB-GENE-040122-4]	http://zfin.org/ZDB-GENE-040122-4	http://zfin.org/ZDB-GENE-040122-4	2.01605e-05	0.44815	0.921	0.683	1
ENSDARG00000077962	gltpb	glycolipid transfer protein b [Source:ZFIN;Acc:ZDB-GENE-091118-80]	http://zfin.org/ZDB-GENE-091118-80	http://zfin.org/ZDB-GENE-091118-80	0.000237892	0.453503	0.518	0.2	1
ENSDARG00000039980	ppt1	palmitoyl-protein thioesterase 1 (ceroid-lipofuscinosis, neuronal 1, infantile) [Source:ZFIN;Acc:ZDB-GENE-040426-2653]	http://zfin.org/ZDB-GENE-040426-2653	http://zfin.org/ZDB-GENE-040426-2653	3.72169e-05	0.453561	0.456	0.117	1
ENSDARG00000009727	twf2b	twinfilin actin-binding protein 2b [Source:ZFIN;Acc:ZDB-GENE-050522-238]	http://zfin.org/ZDB-GENE-050522-238	http://zfin.org/ZDB-GENE-050522-238	2.78247e-07	0.454664	0.965	0.65	1
ENSDARG00000089681	btf3l4	basic transcription factor 3-like 4 [Source:ZFIN;Acc:ZDB-GENE-040426-1650]	http://zfin.org/ZDB-GENE-040426-1650	http://zfin.org/ZDB-GENE-040426-1650	2.82626e-05	0.455673	0.833	0.5	1
ENSDARG00000015887	b2ml	beta-2-microglobulin, like [Source:ZFIN;Acc:ZDB-GENE-040426-2136]	http://zfin.org/ZDB-GENE-040426-2136	http://zfin.org/ZDB-GENE-040426-2136	0.000268088	0.455676	0.632	0.3	1
ENSDARG00000003641	tfg	trk-fused gene [Source:ZFIN;Acc:ZDB-GENE-030131-8410]	http://zfin.org/ZDB-GENE-030131-8410	http://zfin.org/ZDB-GENE-030131-8410	5.46401e-05	0.455981	0.921	0.717	1
ENSDARG00000031108	lrba	LPS-responsive vesicle trafficking, beach and anchor containing [Source:ZFIN;Acc:ZDB-GENE-090311-19]	http://zfin.org/ZDB-GENE-090311-19	http://zfin.org/ZDB-GENE-090311-19	7.12997e-05	0.458865	0.412	0.1	1
ENSDARG00000013144	atp1b1a	ATPase, Na+/K+ transporting, beta 1a polypeptide [Source:ZFIN;Acc:ZDB-GENE-001127-3]	http://zfin.org/ZDB-GENE-001127-3	http://zfin.org/ZDB-GENE-001127-3	6.36664e-05	0.459111	0.93	0.683	1
ENSDARG00000008735	atp6ap2	ATPase, H+ transporting, lysosomal accessory protein 2 [Source:ZFIN;Acc:ZDB-GENE-040426-1960]	http://zfin.org/ZDB-GENE-040426-1960	http://zfin.org/ZDB-GENE-040426-1960	0.000140203	0.461098	0.886	0.65	1
ENSDARG00000100990	nme3	NME/NM23 nucleoside diphosphate kinase 3 [Source:ZFIN;Acc:ZDB-GENE-000210-34]	http://zfin.org/ZDB-GENE-000210-34	http://zfin.org/ZDB-GENE-000210-34	0.000122637	0.461662	0.509	0.183	1
ENSDARG00000094423	AL954359.2		http://zfin.org/	http://zfin.org/	0.000272172	0.462464	0.754	0.433	1
ENSDARG00000043009	fam43a	family with sequence similarity 43, member A [Source:ZFIN;Acc:ZDB-GENE-030131-6098]	http://zfin.org/ZDB-GENE-030131-6098	http://zfin.org/ZDB-GENE-030131-6098	6.1777e-05	0.462844	0.272	0.033	1
ENSDARG00000086471	pkig	protein kinase (cAMP-dependent, catalytic) inhibitor gamma [Source:ZFIN;Acc:ZDB-GENE-050302-97]	http://zfin.org/ZDB-GENE-050302-97	http://zfin.org/ZDB-GENE-050302-97	3.38158e-06	0.463525	0.746	0.333	1
ENSDARG00000101794	atp6v0e1	ATPase, H+ transporting, lysosomal V0 subunit e1 [Source:ZFIN;Acc:ZDB-GENE-041010-133]	http://zfin.org/ZDB-GENE-041010-133	http://zfin.org/ZDB-GENE-041010-133	1.2555e-06	0.467456	0.921	0.583	1
ENSDARG00000079307	TMEM269	si:dkey-205h13.1 [Source:ZFIN;Acc:ZDB-GENE-090313-227]	http://zfin.org/ZDB-GENE-090313-227	http://zfin.org/ZDB-GENE-090313-227	4.94438e-06	0.469704	0.43	0.083	1
ENSDARG00000094719	CR318588.3		http://zfin.org/	http://zfin.org/	0.0054976	0.470459	0.263	0.067	1
ENSDARG00000074396	fscn2b	fascin actin-bundling protein 2b, retinal [Source:ZFIN;Acc:ZDB-GENE-040426-1740]	http://zfin.org/ZDB-GENE-040426-1740	http://zfin.org/ZDB-GENE-040426-1740	1.99207e-07	0.470882	0.588	0.167	1
ENSDARG00000013252	si:dkey-202l16.5	si:dkey-202l16.5 [Source:ZFIN;Acc:ZDB-GENE-120411-6]	http://zfin.org/ZDB-GENE-120411-6	http://zfin.org/ZDB-GENE-120411-6	9.46936e-07	0.471318	0.737	0.317	1
ENSDARG00000104457	MPV17L	si:dkeyp-72e1.7 [Source:ZFIN;Acc:ZDB-GENE-120215-229]	http://zfin.org/ZDB-GENE-120215-229	http://zfin.org/ZDB-GENE-120215-229	8.45542e-05	0.471989	0.553	0.2	1
ENSDARG00000006832	galnt9	polypeptide N-acetylgalactosaminyltransferase 9 [Source:ZFIN;Acc:ZDB-GENE-060526-21]	http://zfin.org/ZDB-GENE-060526-21	http://zfin.org/ZDB-GENE-060526-21	0.000349613	0.472332	0.307	0.05	1
ENSDARG00000079914	stoml3a	stomatin (EPB72)-like 3a [Source:ZFIN;Acc:ZDB-GENE-070620-18]	http://zfin.org/ZDB-GENE-070620-18	http://zfin.org/ZDB-GENE-070620-18	0.000275225	0.474038	0.36	0.083	1
ENSDARG00000053381	plpp1a	phospholipid phosphatase 1a [Source:ZFIN;Acc:ZDB-GENE-080225-26]	http://zfin.org/ZDB-GENE-080225-26	http://zfin.org/ZDB-GENE-080225-26	3.08227e-06	0.474563	0.43	0.083	1
ENSDARG00000038154	isca2	iron-sulfur cluster assembly 2 [Source:ZFIN;Acc:ZDB-GENE-131121-486]	http://zfin.org/ZDB-GENE-131121-486	http://zfin.org/ZDB-GENE-131121-486	5.07712e-06	0.476078	0.623	0.217	1
ENSDARG00000054849	bcat2	branched chain amino-acid transaminase 2, mitochondrial [Source:ZFIN;Acc:ZDB-GENE-040718-425]	http://zfin.org/ZDB-GENE-040718-425	http://zfin.org/ZDB-GENE-040718-425	1.72521e-06	0.479899	0.579	0.167	1
ENSDARG00000079840	kcnma1a	potassium large conductance calcium-activated channel, subfamily M, alpha member 1a [Source:ZFIN;Acc:ZDB-GENE-070202-9]	http://zfin.org/ZDB-GENE-070202-9	http://zfin.org/ZDB-GENE-070202-9	0.000369293	0.480301	0.412	0.133	1
ENSDARG00000025012	tpi1a	triosephosphate isomerase 1a [Source:ZFIN;Acc:ZDB-GENE-020416-3]	http://zfin.org/ZDB-GENE-020416-3	http://zfin.org/ZDB-GENE-020416-3	2.18367e-05	0.480503	0.482	0.167	1
ENSDARG00000014361	tmbim4	transmembrane BAX inhibitor motif containing 4 [Source:ZFIN;Acc:ZDB-GENE-040426-2152]	http://zfin.org/ZDB-GENE-040426-2152	http://zfin.org/ZDB-GENE-040426-2152	7.47916e-06	0.485384	0.754	0.383	1
ENSDARG00000019302	mid1ip1b	MID1 interacting protein 1b [Source:ZFIN;Acc:ZDB-GENE-040426-1720]	http://zfin.org/ZDB-GENE-040426-1720	http://zfin.org/ZDB-GENE-040426-1720	0.000256477	0.486574	0.728	0.4	1
ENSDARG00000040988	tpi1b	triosephosphate isomerase 1b [Source:ZFIN;Acc:ZDB-GENE-020416-4]	http://zfin.org/ZDB-GENE-020416-4	http://zfin.org/ZDB-GENE-020416-4	1.72897e-05	0.487434	0.5	0.133	1
ENSDARG00000094836	si:ch211-195b15.8	si:ch211-195b15.8 [Source:ZFIN;Acc:ZDB-GENE-131127-627]	http://zfin.org/ZDB-GENE-131127-627	http://zfin.org/ZDB-GENE-131127-627	0.000530975	0.489036	0.465	0.167	1
ENSDARG00000056108	ndufa4	NADH dehydrogenase (ubiquinone) 1 alpha subcomplex, 4 [Source:ZFIN;Acc:ZDB-GENE-040426-1962]	http://zfin.org/ZDB-GENE-040426-1962	http://zfin.org/ZDB-GENE-040426-1962	0.000672008	0.492605	0.307	0.067	1
ENSDARG00000063433	atp2b2	ATPase, Ca++ transporting, plasma membrane 2 [Source:ZFIN;Acc:ZDB-GENE-061016-1]	http://zfin.org/ZDB-GENE-061016-1	http://zfin.org/ZDB-GENE-061016-1	2.30413e-05	0.493133	0.325	0.033	1
ENSDARG00000069951	eef1a1b	eukaryotic translation elongation factor 1 alpha 1b [Source:ZFIN;Acc:ZDB-GENE-050417-327]	http://zfin.org/ZDB-GENE-050417-327	http://zfin.org/ZDB-GENE-050417-327	9.88276e-06	0.494768	0.754	0.367	1
ENSDARG00000024116	vamp8	vesicle-associated membrane protein 8 (endobrevin) [Source:ZFIN;Acc:ZDB-GENE-030131-5215]	http://zfin.org/ZDB-GENE-030131-5215	http://zfin.org/ZDB-GENE-030131-5215	9.52016e-05	0.4951	0.842	0.65	1
ENSDARG00000045980	cst14b.1	cystatin 14b, tandem duplicate 1 [Source:ZFIN;Acc:ZDB-GENE-061013-189]	http://zfin.org/ZDB-GENE-061013-189	http://zfin.org/ZDB-GENE-061013-189	0.000122562	0.499957	0.421	0.167	1
ENSDARG00000063636	galnt11	UDP-N-acetyl-alpha-D-galactosamine:polypeptide N-acetylgalactosaminyltransferase 11 (GalNAc-T11) [Source:ZFIN;Acc:ZDB-GENE-060929-998]	http://zfin.org/ZDB-GENE-060929-998	http://zfin.org/ZDB-GENE-060929-998	4.9774e-12	0.499971	0.851	0.317	1
ENSDARG00000020239	lpin1	lipin 1 [Source:ZFIN;Acc:ZDB-GENE-080722-2]	http://zfin.org/ZDB-GENE-080722-2	http://zfin.org/ZDB-GENE-080722-2	0.000135506	0.500484	0.368	0.083	1
ENSDARG00000100728	mkrn2os.2	MKRN2 opposite strand, tandem duplicate 2 [Source:ZFIN;Acc:ZDB-GENE-160114-87]	http://zfin.org/ZDB-GENE-160114-87	http://zfin.org/ZDB-GENE-160114-87	4.68055e-05	0.506544	0.614	0.25	1
ENSDARG00000017982	cyp39a1	cytochrome P450, family 39, subfamily A, polypeptide 1 [Source:ZFIN;Acc:ZDB-GENE-041014-339]	http://zfin.org/ZDB-GENE-041014-339	http://zfin.org/ZDB-GENE-041014-339	3.35055e-06	0.511213	0.465	0.1	1
ENSDARG00000043531	jun	jun proto-oncogene [Source:ZFIN;Acc:ZDB-GENE-030131-7859]	http://zfin.org/ZDB-GENE-030131-7859	http://zfin.org/ZDB-GENE-030131-7859	7.53879e-08	0.51316	0.982	0.783	1
ENSDARG00000058147	dnajc5b	DnaJ (Hsp40) homolog, subfamily C, member 5 beta [Source:ZFIN;Acc:ZDB-GENE-050413-1]	http://zfin.org/ZDB-GENE-050413-1	http://zfin.org/ZDB-GENE-050413-1	3.69417e-11	0.513985	0.965	0.567	1
ENSDARG00000017602	ccng2	cyclin G2 [Source:ZFIN;Acc:ZDB-GENE-021016-1]	http://zfin.org/ZDB-GENE-021016-1	http://zfin.org/ZDB-GENE-021016-1	0.000114243	0.518828	0.588	0.233	1
ENSDARG00000037059	slc44a2	solute carrier family 44 (choline transporter), member 2 [Source:ZFIN;Acc:ZDB-GENE-030131-3065]	http://zfin.org/ZDB-GENE-030131-3065	http://zfin.org/ZDB-GENE-030131-3065	4.91383e-09	0.524987	0.5	0.067	1
ENSDARG00000035136	sepw1	selenoprotein W, 1 [Source:ZFIN;Acc:ZDB-GENE-030410-5]	http://zfin.org/ZDB-GENE-030410-5	http://zfin.org/ZDB-GENE-030410-5	1.22796e-08	0.526784	0.982	0.767	1
ENSDARG00000012987	gpia	glucose-6-phosphate isomerase a [Source:ZFIN;Acc:ZDB-GENE-020513-2]	http://zfin.org/ZDB-GENE-020513-2	http://zfin.org/ZDB-GENE-020513-2	1.9297e-06	0.530677	0.535	0.167	1
ENSDARG00000053487	osbp2	oxysterol binding protein 2 [Source:ZFIN;Acc:ZDB-GENE-091113-18]	http://zfin.org/ZDB-GENE-091113-18	http://zfin.org/ZDB-GENE-091113-18	8.31327e-06	0.530714	0.57	0.183	1
ENSDARG00000018757	klf5l	Kruppel-like factor 5 like [Source:ZFIN;Acc:ZDB-GENE-060312-34]	http://zfin.org/ZDB-GENE-060312-34	http://zfin.org/ZDB-GENE-060312-34	9.64611e-05	0.53296	0.711	0.367	1
ENSDARG00000062752	mfap3l	microfibrillar-associated protein 3-like [Source:ZFIN;Acc:ZDB-GENE-111229-2]	http://zfin.org/ZDB-GENE-111229-2	http://zfin.org/ZDB-GENE-111229-2	6.55052e-07	0.533255	0.518	0.117	1
ENSDARG00000005713	ethe1	ethylmalonic encephalopathy 1 [Source:ZFIN;Acc:ZDB-GENE-040426-2503]	http://zfin.org/ZDB-GENE-040426-2503	http://zfin.org/ZDB-GENE-040426-2503	3.6799e-05	0.533348	0.526	0.167	1
ENSDARG00000018529	lipf	lipase, gastric [Source:ZFIN;Acc:ZDB-GENE-040426-2737]	http://zfin.org/ZDB-GENE-040426-2737	http://zfin.org/ZDB-GENE-040426-2737	4.01701e-07	0.534535	0.36	0.017	1
ENSDARG00000036966	hsd3b7	hydroxy-delta-5-steroid dehydrogenase, 3 beta- and steroid delta-isomerase [Source:ZFIN;Acc:ZDB-GENE-030131-5673]	http://zfin.org/ZDB-GENE-030131-5673	http://zfin.org/ZDB-GENE-030131-5673	2.24093e-08	0.53885	0.377	0.033	1
ENSDARG00000032619	tob1a	transducer of ERBB2, 1a [Source:ZFIN;Acc:ZDB-GENE-031030-4]	http://zfin.org/ZDB-GENE-031030-4	http://zfin.org/ZDB-GENE-031030-4	6.26739e-05	0.539545	0.789	0.467	1
ENSDARG00000089936	sepw2b	selenoprotein W, 2b [Source:ZFIN;Acc:ZDB-GENE-030428-2]	http://zfin.org/ZDB-GENE-030428-2	http://zfin.org/ZDB-GENE-030428-2	0.000185819	0.540058	0.623	0.35	1
ENSDARG00000101919	foxj1a	forkhead box J1a [Source:ZFIN;Acc:ZDB-GENE-060929-1178]	http://zfin.org/ZDB-GENE-060929-1178	http://zfin.org/ZDB-GENE-060929-1178	7.8318e-05	0.542868	0.614	0.267	1
ENSDARG00000031776	zgc:92066	zgc:92066 [Source:ZFIN;Acc:ZDB-GENE-040718-72]	http://zfin.org/ZDB-GENE-040718-72	http://zfin.org/ZDB-GENE-040718-72	3.73664e-08	0.54616	1	1	1
ENSDARG00000020847	atp6v0a1a	ATPase, H+ transporting, lysosomal V0 subunit a1a [Source:ZFIN;Acc:ZDB-GENE-030131-3027]	http://zfin.org/ZDB-GENE-030131-3027	http://zfin.org/ZDB-GENE-030131-3027	2.04719e-06	0.547078	0.798	0.4	1
ENSDARG00000010052	ndrg3b	ndrg family member 3b [Source:ZFIN;Acc:ZDB-GENE-030131-5606]	http://zfin.org/ZDB-GENE-030131-5606	http://zfin.org/ZDB-GENE-030131-5606	1.82093e-06	0.548451	0.789	0.383	1
ENSDARG00000035508	barhl1a	BarH-like homeobox 1a [Source:ZFIN;Acc:ZDB-GENE-050417-212]	http://zfin.org/ZDB-GENE-050417-212	http://zfin.org/ZDB-GENE-050417-212	0.00303904	0.555089	0.518	0.3	1
ENSDARG00000015449	fut8a	fucosyltransferase 8a (alpha (1,6) fucosyltransferase) [Source:ZFIN;Acc:ZDB-GENE-031118-20]	http://zfin.org/ZDB-GENE-031118-20	http://zfin.org/ZDB-GENE-031118-20	8.55069e-07	0.555179	0.596	0.183	1
ENSDARG00000103848	apba1a	amyloid beta (A4) precursor protein-binding, family A, member 1a [Source:ZFIN;Acc:ZDB-GENE-060526-175]	http://zfin.org/ZDB-GENE-060526-175	http://zfin.org/ZDB-GENE-060526-175	2.74618e-06	0.555432	0.649	0.233	1
ENSDARG00000036189	spata4	spermatogenesis associated 4 [Source:ZFIN;Acc:ZDB-GENE-050417-153]	http://zfin.org/ZDB-GENE-050417-153	http://zfin.org/ZDB-GENE-050417-153	3.25837e-07	0.557677	0.719	0.317	1
ENSDARG00000033104	tmc2a	transmembrane channel-like 2a [Source:ZFIN;Acc:ZDB-GENE-060526-280]	http://zfin.org/ZDB-GENE-060526-280	http://zfin.org/ZDB-GENE-060526-280	0.0411347	0.557754	0.298	0.117	1
ENSDARG00000036462	rab11fip1b	RAB11 family interacting protein 1 (class I) b [Source:ZFIN;Acc:ZDB-GENE-091204-322]	http://zfin.org/ZDB-GENE-091204-322	http://zfin.org/ZDB-GENE-091204-322	5.69352e-10	0.558259	0.614	0.117	1
ENSDARG00000039650	itm2cb	integral membrane protein 2Cb [Source:ZFIN;Acc:ZDB-GENE-030131-7806]	http://zfin.org/ZDB-GENE-030131-7806	http://zfin.org/ZDB-GENE-030131-7806	5.68398e-09	0.564162	0.816	0.333	1
ENSDARG00000102482	CYSTM1 (1 of many)	zgc:165573 [Source:ZFIN;Acc:ZDB-GENE-070615-27]	http://zfin.org/ZDB-GENE-070615-27	http://zfin.org/ZDB-GENE-070615-27	7.39358e-09	0.565096	0.693	0.2	1
ENSDARG00000018600	retsat	retinol saturase (all-trans-retinol 13,14-reductase) [Source:ZFIN;Acc:ZDB-GENE-050320-11]	http://zfin.org/ZDB-GENE-050320-11	http://zfin.org/ZDB-GENE-050320-11	4.1931e-08	0.568997	0.43	0.033	1
ENSDARG00000099405	CU694952.1		http://zfin.org/	http://zfin.org/	0.00024314	0.575341	0.184	0	1
ENSDARG00000102261	RSPH1	radial spoke head 1 homolog [Source:HGNC Symbol;Acc:HGNC:12371]	http://zfin.org/	http://zfin.org/	1.70102e-07	0.576962	0.842	0.433	1
ENSDARG00000029368	srpk2	SRSF protein kinase 2 [Source:ZFIN;Acc:ZDB-GENE-131105-1]	http://zfin.org/ZDB-GENE-131105-1	http://zfin.org/ZDB-GENE-131105-1	1.37041e-06	0.582503	0.684	0.267	1
ENSDARG00000100292	fam166b	family with sequence similarity 166, member B [Source:ZFIN;Acc:ZDB-GENE-070209-41]	http://zfin.org/ZDB-GENE-070209-41	http://zfin.org/ZDB-GENE-070209-41	1.99109e-06	0.583956	0.333	0.017	1
ENSDARG00000034293	hif1ab	hypoxia inducible factor 1, alpha subunit (basic helix-loop-helix transcription factor) b [Source:ZFIN;Acc:ZDB-GENE-040426-706]	http://zfin.org/ZDB-GENE-040426-706	http://zfin.org/ZDB-GENE-040426-706	1.38647e-05	0.584466	0.763	0.417	1
ENSDARG00000019033	tmem59	transmembrane protein 59 [Source:ZFIN;Acc:ZDB-GENE-070912-397]	http://zfin.org/ZDB-GENE-070912-397	http://zfin.org/ZDB-GENE-070912-397	5.78966e-08	0.586761	0.868	0.517	1
ENSDARG00000076959	si:ch211-38m6.6	si:ch211-38m6.6 [Source:ZFIN;Acc:ZDB-GENE-070705-179]	http://zfin.org/ZDB-GENE-070705-179	http://zfin.org/ZDB-GENE-070705-179	1.57849e-07	0.591812	0.649	0.2	1
ENSDARG00000099730	pkma	pyruvate kinase, muscle, a [Source:ZFIN;Acc:ZDB-GENE-031201-4]	http://zfin.org/ZDB-GENE-031201-4	http://zfin.org/ZDB-GENE-031201-4	4.61903e-08	0.595485	0.886	0.483	1
ENSDARG00000057128	hadhaa	hydroxyacyl-CoA dehydrogenase/3-ketoacyl-CoA thiolase/enoyl-CoA hydratase (trifunctional protein), alpha subunit a [Source:ZFIN;Acc:ZDB-GENE-031222-5]	http://zfin.org/ZDB-GENE-031222-5	http://zfin.org/ZDB-GENE-031222-5	5.49931e-08	0.596514	0.395	0.05	1
ENSDARG00000053535	lmo7b	LIM domain 7b [Source:ZFIN;Acc:ZDB-GENE-060825-242]	http://zfin.org/ZDB-GENE-060825-242	http://zfin.org/ZDB-GENE-060825-242	1.28865e-07	0.606502	0.711	0.267	1
ENSDARG00000069262	erich3	glutamate-rich 3 [Source:ZFIN;Acc:ZDB-GENE-070209-295]	http://zfin.org/ZDB-GENE-070209-295	http://zfin.org/ZDB-GENE-070209-295	1.96165e-06	0.618975	0.439	0.083	1
ENSDARG00000093646	AL954359.1		http://zfin.org/	http://zfin.org/	2.00707e-07	0.627561	0.702	0.25	1
ENSDARG00000003520	tbc1d14	TBC1 domain family, member 14 [Source:ZFIN;Acc:ZDB-GENE-030131-6136]	http://zfin.org/ZDB-GENE-030131-6136	http://zfin.org/ZDB-GENE-030131-6136	2.33682e-07	0.639669	0.605	0.167	1
ENSDARG00000018817	bdnf	brain-derived neurotrophic factor [Source:ZFIN;Acc:ZDB-GENE-000412-1]	http://zfin.org/ZDB-GENE-000412-1	http://zfin.org/ZDB-GENE-000412-1	1.21206e-07	0.642881	0.86	0.45	1
ENSDARG00000025348	igfbp5b	insulin-like growth factor binding protein 5b [Source:ZFIN;Acc:ZDB-GENE-040319-2]	http://zfin.org/ZDB-GENE-040319-2	http://zfin.org/ZDB-GENE-040319-2	2.54893e-07	0.64899	0.684	0.233	1
ENSDARG00000020544	rem1	RAS (RAD and GEM)-like GTP-binding 1 [Source:ZFIN;Acc:ZDB-GENE-040317-1]	http://zfin.org/ZDB-GENE-040317-1	http://zfin.org/ZDB-GENE-040317-1	2.20006e-11	0.65618	0.535	0.083	1
ENSDARG00000054136	ccdc105	coiled-coil domain containing 105 [Source:ZFIN;Acc:ZDB-GENE-131121-219]	http://zfin.org/ZDB-GENE-131121-219	http://zfin.org/ZDB-GENE-131121-219	3.16822e-08	0.65819	0.596	0.133	1
ENSDARG00000026801	stau2	staufen double-stranded RNA binding protein 2 [Source:ZFIN;Acc:ZDB-GENE-040426-687]	http://zfin.org/ZDB-GENE-040426-687	http://zfin.org/ZDB-GENE-040426-687	8.02586e-08	0.658429	0.719	0.283	1
ENSDARG00000077901	herc1	HECT and RLD domain containing E3 ubiquitin protein ligase family member 1 [Source:ZFIN;Acc:ZDB-GENE-030131-8542]	http://zfin.org/ZDB-GENE-030131-8542	http://zfin.org/ZDB-GENE-030131-8542	6.97888e-08	0.660228	0.658	0.2	1
ENSDARG00000101849	adipor2	adiponectin receptor 2 [Source:ZFIN;Acc:ZDB-GENE-041210-60]	http://zfin.org/ZDB-GENE-041210-60	http://zfin.org/ZDB-GENE-041210-60	6.27157e-08	0.663976	0.912	0.583	1
ENSDARG00000105147	osbpl1a	oxysterol binding protein-like 1A [Source:ZFIN;Acc:ZDB-GENE-050208-657]	http://zfin.org/ZDB-GENE-050208-657	http://zfin.org/ZDB-GENE-050208-657	1.55714e-07	0.664262	0.746	0.3	1
ENSDARG00000030839	tescb	tescalcin b [Source:ZFIN;Acc:ZDB-GENE-040426-1903]	http://zfin.org/ZDB-GENE-040426-1903	http://zfin.org/ZDB-GENE-040426-1903	1.29665e-08	0.67385	0.842	0.417	1
ENSDARG00000076221	zgc:198419	zgc:198419 [Source:ZFIN;Acc:ZDB-GENE-030131-7540]	http://zfin.org/ZDB-GENE-030131-7540	http://zfin.org/ZDB-GENE-030131-7540	5.96541e-05	0.677942	0.868	0.583	1
ENSDARG00000004060	bhlhe40	basic helix-loop-helix family, member e40 [Source:ZFIN;Acc:ZDB-GENE-030131-3133]	http://zfin.org/ZDB-GENE-030131-3133	http://zfin.org/ZDB-GENE-030131-3133	4.26926e-05	0.68468	0.43	0.117	1
ENSDARG00000042824	nfe2l2a	nuclear factor, erythroid 2-like 2a [Source:ZFIN;Acc:ZDB-GENE-030723-2]	http://zfin.org/ZDB-GENE-030723-2	http://zfin.org/ZDB-GENE-030723-2	9.22528e-14	0.68563	0.991	0.85	1
ENSDARG00000069374	sh2d4ba	SH2 domain containing 4Ba [Source:ZFIN;Acc:ZDB-GENE-090313-53]	http://zfin.org/ZDB-GENE-090313-53	http://zfin.org/ZDB-GENE-090313-53	5.56935e-07	0.69233	0.544	0.133	1
ENSDARG00000070584	clic5b	chloride intracellular channel 5b [Source:ZFIN;Acc:ZDB-GENE-040426-2542]	http://zfin.org/ZDB-GENE-040426-2542	http://zfin.org/ZDB-GENE-040426-2542	1.42912e-11	0.697585	0.535	0.05	1
ENSDARG00000099014	fxyd1	FXYD domain containing ion transport regulator 1 (phospholemman) [Source:ZFIN;Acc:ZDB-GENE-050309-14]	http://zfin.org/ZDB-GENE-050309-14	http://zfin.org/ZDB-GENE-050309-14	3.39245e-07	0.698563	0.816	0.4	1
ENSDARG00000102076	zgc:158852	zgc:158852 [Source:ZFIN;Acc:ZDB-GENE-070112-972]	http://zfin.org/ZDB-GENE-070112-972	http://zfin.org/ZDB-GENE-070112-972	9.94026e-09	0.702443	0.526	0.083	1
ENSDARG00000100952	wu:fj16a03	wu:fj16a03 [Source:NCBI gene;Acc:335475]	http://zfin.org/	http://zfin.org/	1.62328e-05	0.703593	0.737	0.633	1
ENSDARG00000059836	ddit3	DNA-damage-inducible transcript 3 [Source:ZFIN;Acc:ZDB-GENE-070410-90]	http://zfin.org/ZDB-GENE-070410-90	http://zfin.org/ZDB-GENE-070410-90	6.60464e-09	0.729782	0.491	0.05	1
ENSDARG00000062794	trim36	tripartite motif containing 36 [Source:ZFIN;Acc:ZDB-GENE-040426-2936]	http://zfin.org/ZDB-GENE-040426-2936	http://zfin.org/ZDB-GENE-040426-2936	1.1024e-09	0.731711	0.737	0.233	1
ENSDARG00000027200	gabarapl2	GABA(A) receptor-associated protein like 2 [Source:ZFIN;Acc:ZDB-GENE-040718-336]	http://zfin.org/ZDB-GENE-040718-336	http://zfin.org/ZDB-GENE-040718-336	1.41503e-10	0.73659	0.895	0.45	1
ENSDARG00000053383	rprma	reprimo, TP53 dependent G2 arrest mediator candidate a [Source:ZFIN;Acc:ZDB-GENE-050522-218]	http://zfin.org/ZDB-GENE-050522-218	http://zfin.org/ZDB-GENE-050522-218	9.46662e-05	0.738189	0.456	0.15	1
ENSDARG00000099672	capgb	capping protein (actin filament), gelsolin-like b [Source:ZFIN;Acc:ZDB-GENE-030131-8541]	http://zfin.org/ZDB-GENE-030131-8541	http://zfin.org/ZDB-GENE-030131-8541	1.28337e-11	0.75616	0.939	0.45	1
ENSDARG00000056252	sort1b	sortilin 1b [Source:ZFIN;Acc:ZDB-GENE-030131-7447]	http://zfin.org/ZDB-GENE-030131-7447	http://zfin.org/ZDB-GENE-030131-7447	2.63318e-11	0.761244	0.588	0.067	1
ENSDARG00000038898	zgc:113691	zgc:113691 [Source:ZFIN;Acc:ZDB-GENE-050220-7]	http://zfin.org/ZDB-GENE-050220-7	http://zfin.org/ZDB-GENE-050220-7	3.50418e-09	0.762045	0.368	0	1
ENSDARG00000079869	si:ch211-218o21.4	si:ch211-218o21.4 [Source:ZFIN;Acc:ZDB-GENE-081104-178]	http://zfin.org/ZDB-GENE-081104-178	http://zfin.org/ZDB-GENE-081104-178	1.33192e-09	0.762218	0.439	0.033	1
ENSDARG00000090145	tmem240b	transmembrane protein 240b [Source:ZFIN;Acc:ZDB-GENE-131127-474]	http://zfin.org/ZDB-GENE-131127-474	http://zfin.org/ZDB-GENE-131127-474	5.1994e-08	0.763821	0.684	0.217	1
ENSDARG00000077360	zgc:173593	zgc:173593 [Source:ZFIN;Acc:ZDB-GENE-071004-57]	http://zfin.org/ZDB-GENE-071004-57	http://zfin.org/ZDB-GENE-071004-57	1.98614e-09	0.767224	0.974	0.833	1
ENSDARG00000075800	calml4a	calmodulin-like 4a [Source:ZFIN;Acc:ZDB-GENE-081022-9]	http://zfin.org/ZDB-GENE-081022-9	http://zfin.org/ZDB-GENE-081022-9	8.44867e-19	0.773892	1	0.667	1
ENSDARG00000089149	CU855484.1		http://zfin.org/	http://zfin.org/	1.00293e-15	0.775454	0.982	0.6	1
ENSDARG00000073936	BX511021.2		http://zfin.org/	http://zfin.org/	7.81168e-22	0.811055	1	0.667	1
ENSDARG00000034187	calm1b	calmodulin 1b [Source:ZFIN;Acc:ZDB-GENE-030804-2]	http://zfin.org/ZDB-GENE-030804-2	http://zfin.org/ZDB-GENE-030804-2	8.39649e-21	0.816672	0.991	0.683	1
ENSDARG00000079336	si:ch211-150j10.4	si:ch211-150j10.4 [Source:ZFIN;Acc:ZDB-GENE-110411-215]	http://zfin.org/ZDB-GENE-110411-215	http://zfin.org/ZDB-GENE-110411-215	6.89804e-14	0.823365	0.518	0.033	1
ENSDARG00000103002	nptna	neuroplastin a [Source:ZFIN;Acc:ZDB-GENE-030804-7]	http://zfin.org/ZDB-GENE-030804-7	http://zfin.org/ZDB-GENE-030804-7	1.02669e-14	0.833053	0.956	0.417	1
ENSDARG00000054878	six2b	SIX homeobox 2b [Source:ZFIN;Acc:ZDB-GENE-080723-23]	http://zfin.org/ZDB-GENE-080723-23	http://zfin.org/ZDB-GENE-080723-23	6.73121e-10	0.83379	0.544	0.067	1
ENSDARG00000045929	oaz2a	ornithine decarboxylase antizyme 2a [Source:ZFIN;Acc:ZDB-GENE-121005-1]	http://zfin.org/ZDB-GENE-121005-1	http://zfin.org/ZDB-GENE-121005-1	1.16837e-10	0.835394	0.754	0.25	1
ENSDARG00000021372	tob1b	transducer of ERBB2, 1b [Source:ZFIN;Acc:ZDB-GENE-040426-2151]	http://zfin.org/ZDB-GENE-040426-2151	http://zfin.org/ZDB-GENE-040426-2151	3.62973e-11	0.849779	0.904	0.5	1
ENSDARG00000070479	tspan13b	tetraspanin 13b [Source:ZFIN;Acc:ZDB-GENE-041010-45]	http://zfin.org/ZDB-GENE-041010-45	http://zfin.org/ZDB-GENE-041010-45	6.9568e-17	0.855101	0.991	0.7	1
ENSDARG00000070440	atp6v1c2	ATPase, H+ transporting, lysosomal, V1 subunit C2 [Source:ZFIN;Acc:ZDB-GENE-131127-65]	http://zfin.org/ZDB-GENE-131127-65	http://zfin.org/ZDB-GENE-131127-65	3.29178e-12	0.877943	0.588	0.067	1
ENSDARG00000019702	aldocb	aldolase C, fructose-bisphosphate, b [Source:ZFIN;Acc:ZDB-GENE-030821-1]	http://zfin.org/ZDB-GENE-030821-1	http://zfin.org/ZDB-GENE-030821-1	3.11231e-12	0.888395	0.833	0.283	1
ENSDARG00000033738	zgc:153867	zgc:153867 [Source:ZFIN;Acc:ZDB-GENE-030131-9170]	http://zfin.org/ZDB-GENE-030131-9170	http://zfin.org/ZDB-GENE-030131-9170	1.3407e-08	0.92646	0.947	0.65	1
ENSDARG00000006207	gpx1b	glutathione peroxidase 1b [Source:ZFIN;Acc:ZDB-GENE-040912-60]	http://zfin.org/ZDB-GENE-040912-60	http://zfin.org/ZDB-GENE-040912-60	8.08645e-21	0.938125	0.991	0.667	1
ENSDARG00000094210	zgc:194125	zgc:194125 [Source:ZFIN;Acc:ZDB-GENE-080722-16]	http://zfin.org/ZDB-GENE-080722-16	http://zfin.org/ZDB-GENE-080722-16	3.56592e-27	0.943485	1	0.983	1
ENSDARG00000052277	cabp2b	calcium binding protein 2b [Source:ZFIN;Acc:ZDB-GENE-081028-55]	http://zfin.org/ZDB-GENE-081028-55	http://zfin.org/ZDB-GENE-081028-55	2.15435e-17	0.965399	0.991	0.583	1
ENSDARG00000005185	cpn1	carboxypeptidase N, polypeptide 1 [Source:ZFIN;Acc:ZDB-GENE-030131-9116]	http://zfin.org/ZDB-GENE-030131-9116	http://zfin.org/ZDB-GENE-030131-9116	1.10045e-12	0.972254	0.851	0.283	1
ENSDARG00000019856	atp1a1b	ATPase, Na+/K+ transporting, alpha 1b polypeptide [Source:ZFIN;Acc:ZDB-GENE-001212-5]	http://zfin.org/ZDB-GENE-001212-5	http://zfin.org/ZDB-GENE-001212-5	1.66418e-06	0.976069	0.482	0.133	1
ENSDARG00000103264	DCDC2C	si:dkey-25g12.4 [Source:ZFIN;Acc:ZDB-GENE-160113-73]	http://zfin.org/ZDB-GENE-160113-73	http://zfin.org/ZDB-GENE-160113-73	8.81107e-11	0.982164	0.702	0.217	1
ENSDARG00000034457	si:ch211-163l21.7	si:ch211-163l21.7 [Source:ZFIN;Acc:ZDB-GENE-081105-176]	http://zfin.org/ZDB-GENE-081105-176	http://zfin.org/ZDB-GENE-081105-176	2.14791e-16	0.992304	0.833	0.183	1
ENSDARG00000037256	si:ch211-145b13.5	si:ch211-145b13.5 [Source:ZFIN;Acc:ZDB-GENE-090313-35]	http://zfin.org/ZDB-GENE-090313-35	http://zfin.org/ZDB-GENE-090313-35	1.14102e-12	0.994767	0.561	0.033	1
ENSDARG00000074049	si:dkeyp-46h3.1	si:dkeyp-46h3.1 [Source:ZFIN;Acc:ZDB-GENE-060503-559]	http://zfin.org/ZDB-GENE-060503-559	http://zfin.org/ZDB-GENE-060503-559	6.60595e-17	0.99913	0.667	0.05	1
ENSDARG00000025855	camk2n1a	calcium/calmodulin-dependent protein kinase II inhibitor 1a [Source:ZFIN;Acc:ZDB-GENE-050522-319]	http://zfin.org/ZDB-GENE-050522-319	http://zfin.org/ZDB-GENE-050522-319	3.82451e-14	1.04168	0.947	0.483	1
ENSDARG00000096616	si:ch211-255p10.3	si:ch211-255p10.3 [Source:ZFIN;Acc:ZDB-GENE-121214-339]	http://zfin.org/ZDB-GENE-121214-339	http://zfin.org/ZDB-GENE-121214-339	1.56887e-11	1.06517	0.632	0.1	1
ENSDARG00000014626	dlx3b	distal-less homeobox 3b [Source:ZFIN;Acc:ZDB-GENE-980526-280]	http://zfin.org/ZDB-GENE-980526-280	http://zfin.org/ZDB-GENE-980526-280	8.70946e-11	1.08578	0.675	0.167	1
ENSDARG00000101743	gb:eh456644	expressed sequence EH456644 [Source:ZFIN;Acc:ZDB-GENE-170331-1]	http://zfin.org/ZDB-GENE-170331-1	http://zfin.org/ZDB-GENE-170331-1	3.40284e-18	1.18505	0.895	0.3	1
ENSDARG00000045804	abhd2b	abhydrolase domain containing 2b [Source:ZFIN;Acc:ZDB-GENE-061027-74]	http://zfin.org/ZDB-GENE-061027-74	http://zfin.org/ZDB-GENE-061027-74	2.31595e-20	1.19574	0.807	0.083	1
ENSDARG00000009779	mcl1a	myeloid cell leukemia 1a [Source:ZFIN;Acc:ZDB-GENE-000511-7]	http://zfin.org/ZDB-GENE-000511-7	http://zfin.org/ZDB-GENE-000511-7	2.40473e-25	1.21615	0.991	0.85	1
ENSDARG00000096849	si:dkey-16p21.8	si:dkey-16p21.8 [Source:ZFIN;Acc:ZDB-GENE-131121-428]	http://zfin.org/ZDB-GENE-131121-428	http://zfin.org/ZDB-GENE-131121-428	1.05967e-26	1.21927	0.991	0.567	1
ENSDARG00000036773	s100s	S100 calcium binding protein S [Source:ZFIN;Acc:ZDB-GENE-040822-31]	http://zfin.org/ZDB-GENE-040822-31	http://zfin.org/ZDB-GENE-040822-31	3.74347e-05	1.2378	0.667	0.467	1
ENSDARG00000058528	cnot10	CCR4-NOT transcription complex, subunit 10 [Source:ZFIN;Acc:ZDB-GENE-060929-368]	http://zfin.org/ZDB-GENE-060929-368	http://zfin.org/ZDB-GENE-060929-368	9.42907e-21	1.26336	0.833	0.15	1
ENSDARG00000055283	id2a	inhibitor of DNA binding 2, dominant negative helix-loop-helix protein, a [Source:ZFIN;Acc:ZDB-GENE-020910-1]	http://zfin.org/ZDB-GENE-020910-1	http://zfin.org/ZDB-GENE-020910-1	1.10844e-17	1.29347	0.886	0.3	1
ENSDARG00000034753	tspan3a	tetraspanin 3a [Source:ZFIN;Acc:ZDB-GENE-030131-7787]	http://zfin.org/ZDB-GENE-030131-7787	http://zfin.org/ZDB-GENE-030131-7787	8.46118e-20	1.30116	0.912	0.3	1
ENSDARG00000099903	si:ch211-193l2.10	si:ch211-193l2.10 [Source:ZFIN;Acc:ZDB-GENE-160114-52]	http://zfin.org/ZDB-GENE-160114-52	http://zfin.org/ZDB-GENE-160114-52	2.81042e-18	1.33004	0.781	0.1	1
ENSDARG00000014209	ODF3L2 (1 of many)	zgc:110183 [Source:ZFIN;Acc:ZDB-GENE-050417-380]	http://zfin.org/ZDB-GENE-050417-380	http://zfin.org/ZDB-GENE-050417-380	8.49677e-22	1.40358	0.763	0.05	1
ENSDARG00000101577	si:ch211-172l8.4	si:ch211-172l8.4 [Source:ZFIN;Acc:ZDB-GENE-131127-224]	http://zfin.org/ZDB-GENE-131127-224	http://zfin.org/ZDB-GENE-131127-224	4.36889e-28	1.47637	0.974	0.617	1
ENSDARG00000019274	rasd1	RAS, dexamethasone-induced 1 [Source:ZFIN;Acc:ZDB-GENE-040426-1473]	http://zfin.org/ZDB-GENE-040426-1473	http://zfin.org/ZDB-GENE-040426-1473	2.10101e-15	1.56928	0.64	0.067	1
ENSDARG00000086059	CABZ01067746.1		http://zfin.org/	http://zfin.org/	6.37472e-16	1.59519	0.605	0.017	1
ENSDARG00000037495	rtn4rl2b	reticulon 4 receptor-like 2b [Source:ZFIN;Acc:ZDB-GENE-040310-2]	http://zfin.org/ZDB-GENE-040310-2	http://zfin.org/ZDB-GENE-040310-2	5.44077e-21	1.66068	0.851	0.217	1
ENSDARG00000045038	tekt3	tektin 3 [Source:ZFIN;Acc:ZDB-GENE-080130-2]	http://zfin.org/ZDB-GENE-080130-2	http://zfin.org/ZDB-GENE-080130-2	4.31952e-26	1.70937	0.763	0.033	1
ENSDARG00000092460	si:dkey-229d2.7	si:dkey-229d2.7 [Source:ZFIN;Acc:ZDB-GENE-060526-265]	http://zfin.org/ZDB-GENE-060526-265	http://zfin.org/ZDB-GENE-060526-265	3.2507e-30	1.78781	0.93	0.083	1
ENSDARG00000026406	anxa5a	annexin A5a [Source:ZFIN;Acc:ZDB-GENE-080220-29]	http://zfin.org/ZDB-GENE-080220-29	http://zfin.org/ZDB-GENE-080220-29	5.07327e-37	2.1225	1	0.667	1
ENSDARG00000037790	pvalb8	parvalbumin 8 [Source:ZFIN;Acc:ZDB-GENE-030805-3]	http://zfin.org/ZDB-GENE-030805-3	http://zfin.org/ZDB-GENE-030805-3	4.84268e-48	2.17068	1	1	1
ENSDARG00000096637	si:dkey-11c5.11	si:dkey-11c5.11 [Source:ZFIN;Acc:ZDB-GENE-121214-253]	http://zfin.org/ZDB-GENE-121214-253	http://zfin.org/ZDB-GENE-121214-253	3.23338e-20	2.42171	0.772	0.217	1
ENSDARG00000099572	hmgn2	high mobility group nucleosomal binding domain 2 [Source:ZFIN;Acc:ZDB-GENE-051030-81]	http://zfin.org/ZDB-GENE-051030-81	http://zfin.org/ZDB-GENE-051030-81	3.38231e-37	-2.18997	0.912	0.967	2
ENSDARG00000076532	si:ch211-222l21.1	si:ch211-222l21.1 [Source:ZFIN;Acc:ZDB-GENE-030131-247]	http://zfin.org/ZDB-GENE-030131-247	http://zfin.org/ZDB-GENE-030131-247	1.56408e-29	-2.1678	0.272	0.867	2
ENSDARG00000016725	gadd45gb.1	growth arrest and DNA-damage-inducible, gamma b, tandem duplicate 1 [Source:ZFIN;Acc:ZDB-GENE-040426-2321]	http://zfin.org/ZDB-GENE-040426-2321	http://zfin.org/ZDB-GENE-040426-2321	5.4501e-15	-2.00963	0.07	0.5	2
ENSDARG00000053990	hmgb2b	high mobility group box 2b [Source:ZFIN;Acc:ZDB-GENE-040912-122]	http://zfin.org/ZDB-GENE-040912-122	http://zfin.org/ZDB-GENE-040912-122	2.88473e-29	-1.70956	0.754	0.85	2
ENSDARG00000054560	her15.1	hairy and enhancer of split-related 15, tandem duplicate 1 [Source:NCBI gene;Acc:359836]	http://zfin.org/	http://zfin.org/	2.60653e-07	-1.65284	0.088	0.2	2
ENSDARG00000035715	marcksl1b	MARCKS-like 1b [Source:ZFIN;Acc:ZDB-GENE-040426-2315]	http://zfin.org/ZDB-GENE-040426-2315	http://zfin.org/ZDB-GENE-040426-2315	3.24591e-23	-1.61411	0.553	0.9	2
ENSDARG00000069503	cldnh	claudin h [Source:ZFIN;Acc:ZDB-GENE-010328-8]	http://zfin.org/ZDB-GENE-010328-8	http://zfin.org/ZDB-GENE-010328-8	2.62976e-26	-1.57531	0.5	0.933	2
ENSDARG00000101766	ptmab	prothymosin, alpha b [Source:ZFIN;Acc:ZDB-GENE-030131-8681]	http://zfin.org/ZDB-GENE-030131-8681	http://zfin.org/ZDB-GENE-030131-8681	1.75194e-39	-1.53277	0.991	1	2
ENSDARG00000053301	insm1b	insulinoma-associated 1b [Source:ZFIN;Acc:ZDB-GENE-030131-2602]	http://zfin.org/ZDB-GENE-030131-2602	http://zfin.org/ZDB-GENE-030131-2602	5.13834e-15	-1.51801	0.026	0.467	2
ENSDARG00000011201	rplp2l	ribosomal protein, large P2, like [Source:ZFIN;Acc:ZDB-GENE-070327-2]	http://zfin.org/ZDB-GENE-070327-2	http://zfin.org/ZDB-GENE-070327-2	5.0132e-39	-1.51112	0.939	0.983	2
ENSDARG00000095966	zgc:171699	zgc:171699 [Source:ZFIN;Acc:ZDB-GENE-071004-24]	http://zfin.org/ZDB-GENE-071004-24	http://zfin.org/ZDB-GENE-071004-24	1.55818e-12	-1.47677	0.026	0.467	2
ENSDARG00000015123	dnase1l4.1	deoxyribonuclease 1 like 4, tandem duplicate 1 [Source:ZFIN;Acc:ZDB-GENE-040808-35]	http://zfin.org/ZDB-GENE-040808-35	http://zfin.org/ZDB-GENE-040808-35	8.98785e-21	-1.4561	0.368	0.85	2
ENSDARG00000099214	h2afvb	H2A histone family, member Vb [Source:ZFIN;Acc:ZDB-GENE-050506-24]	http://zfin.org/ZDB-GENE-050506-24	http://zfin.org/ZDB-GENE-050506-24	7.50212e-29	-1.40252	0.868	0.95	2
ENSDARG00000033614	rasgef1ba	RasGEF domain family, member 1Ba [Source:ZFIN;Acc:ZDB-GENE-030131-5783]	http://zfin.org/ZDB-GENE-030131-5783	http://zfin.org/ZDB-GENE-030131-5783	1.80011e-12	-1.39225	0.061	0.4	2
ENSDARG00000028335	hmga1a	high mobility group AT-hook 1a [Source:ZFIN;Acc:ZDB-GENE-010502-1]	http://zfin.org/ZDB-GENE-010502-1	http://zfin.org/ZDB-GENE-010502-1	2.81561e-22	-1.3781	0.833	0.933	2
ENSDARG00000078155	si:ch211-163l21.4	si:ch211-163l21.4 [Source:ZFIN;Acc:ZDB-GENE-081105-161]	http://zfin.org/ZDB-GENE-081105-161	http://zfin.org/ZDB-GENE-081105-161	5.15878e-17	-1.36515	0.079	0.55	2
ENSDARG00000010791	dla	deltaA [Source:ZFIN;Acc:ZDB-GENE-980526-29]	http://zfin.org/ZDB-GENE-980526-29	http://zfin.org/ZDB-GENE-980526-29	1.64891e-07	-1.36031	0.105	0.333	2
ENSDARG00000095556	CR318588.4		http://zfin.org/	http://zfin.org/	1.19397e-12	-1.34703	0.316	0.65	2
ENSDARG00000034138	shisa2a	shisa family member 2a [Source:ZFIN;Acc:ZDB-GENE-030925-31]	http://zfin.org/ZDB-GENE-030925-31	http://zfin.org/ZDB-GENE-030925-31	4.66771e-15	-1.33428	0.105	0.667	2
ENSDARG00000004232	dlb	deltaB [Source:ZFIN;Acc:ZDB-GENE-980526-114]	http://zfin.org/ZDB-GENE-980526-114	http://zfin.org/ZDB-GENE-980526-114	9.67734e-15	-1.32014	0.149	0.517	2
ENSDARG00000103919	si:ch73-1a9.3	si:ch73-1a9.3 [Source:ZFIN;Acc:ZDB-GENE-141216-84]	http://zfin.org/ZDB-GENE-141216-84	http://zfin.org/ZDB-GENE-141216-84	2.33448e-19	-1.31308	0.868	0.867	2
ENSDARG00000092807	RPL41	si:dkey-151g10.6 [Source:ZFIN;Acc:ZDB-GENE-030131-7528]	http://zfin.org/ZDB-GENE-030131-7528	http://zfin.org/ZDB-GENE-030131-7528	2.16946e-48	-1.28203	1	1	2
ENSDARG00000025850	rps21	ribosomal protein S21 [Source:ZFIN;Acc:ZDB-GENE-040426-1102]	http://zfin.org/ZDB-GENE-040426-1102	http://zfin.org/ZDB-GENE-040426-1102	5.16919e-31	-1.25682	0.947	0.983	2
ENSDARG00000009212	ppiaa	peptidylprolyl isomerase Aa (cyclophilin A) [Source:ZFIN;Acc:ZDB-GENE-030131-8556]	http://zfin.org/ZDB-GENE-030131-8556	http://zfin.org/ZDB-GENE-030131-8556	3.72531e-21	-1.24201	0.807	0.9	2
ENSDARG00000021864	rplp1	ribosomal protein, large, P1 [Source:ZFIN;Acc:ZDB-GENE-030131-8663]	http://zfin.org/ZDB-GENE-030131-8663	http://zfin.org/ZDB-GENE-030131-8663	2.82977e-36	-1.19674	1	1	2
ENSDARG00000056929	kdm6bb	lysine (K)-specific demethylase 6B, b [Source:ZFIN;Acc:ZDB-GENE-040724-166]	http://zfin.org/ZDB-GENE-040724-166	http://zfin.org/ZDB-GENE-040724-166	1.00655e-15	-1.1948	0.079	0.567	2
ENSDARG00000089302	hnrnpa0a	heterogeneous nuclear ribonucleoprotein A0a [Source:ZFIN;Acc:ZDB-GENE-030131-2249]	http://zfin.org/ZDB-GENE-030131-2249	http://zfin.org/ZDB-GENE-030131-2249	2.15802e-23	-1.19442	0.579	0.867	2
ENSDARG00000041723	zgc:55461	zgc:55461 [Source:ZFIN;Acc:ZDB-GENE-040426-2879]	http://zfin.org/ZDB-GENE-040426-2879	http://zfin.org/ZDB-GENE-040426-2879	2.17284e-12	-1.17905	0.982	0.983	2
ENSDARG00000099865	hnrnpabb	heterogeneous nuclear ribonucleoprotein A/Bb [Source:ZFIN;Acc:ZDB-GENE-040426-2516]	http://zfin.org/ZDB-GENE-040426-2516	http://zfin.org/ZDB-GENE-040426-2516	8.82754e-21	-1.17266	0.772	0.9	2
ENSDARG00000020219	dld	deltaD [Source:ZFIN;Acc:ZDB-GENE-990415-47]	http://zfin.org/ZDB-GENE-990415-47	http://zfin.org/ZDB-GENE-990415-47	1.63708e-10	-1.17213	0.009	0.383	2
ENSDARG00000088030	rpl35a	ribosomal protein L35a [Source:ZFIN;Acc:ZDB-GENE-040718-190]	http://zfin.org/ZDB-GENE-040718-190	http://zfin.org/ZDB-GENE-040718-190	9.5661e-32	-1.17175	0.965	0.95	2
ENSDARG00000001889	tuba1a	tubulin, alpha 1a [Source:ZFIN;Acc:ZDB-GENE-090507-4]	http://zfin.org/ZDB-GENE-090507-4	http://zfin.org/ZDB-GENE-090507-4	3.81995e-17	-1.17143	0.974	1	2
ENSDARG00000007960	hnrnpaba	heterogeneous nuclear ribonucleoprotein A/Ba [Source:ZFIN;Acc:ZDB-GENE-030131-185]	http://zfin.org/ZDB-GENE-030131-185	http://zfin.org/ZDB-GENE-030131-185	5.51961e-26	-1.16007	0.895	0.85	2
ENSDARG00000099104	rpl24	ribosomal protein L24 [Source:ZFIN;Acc:ZDB-GENE-020419-25]	http://zfin.org/ZDB-GENE-020419-25	http://zfin.org/ZDB-GENE-020419-25	4.28329e-30	-1.15671	0.956	0.967	2
ENSDARG00000011405	rps9	ribosomal protein S9 [Source:ZFIN;Acc:ZDB-GENE-010724-15]	http://zfin.org/ZDB-GENE-010724-15	http://zfin.org/ZDB-GENE-010724-15	6.9166e-28	-1.15177	0.965	1	2
ENSDARG00000036161	hnrnpa0l	heterogeneous nuclear ribonucleoprotein A0, like [Source:ZFIN;Acc:ZDB-GENE-030131-618]	http://zfin.org/ZDB-GENE-030131-618	http://zfin.org/ZDB-GENE-030131-618	6.52469e-21	-1.15052	0.86	0.933	2
ENSDARG00000034291	rpl37	ribosomal protein L37 [Source:ZFIN;Acc:ZDB-GENE-040625-39]	http://zfin.org/ZDB-GENE-040625-39	http://zfin.org/ZDB-GENE-040625-39	5.1232e-34	-1.14951	1	1	2
ENSDARG00000052856	khdrbs1a	KH domain containing, RNA binding, signal transduction associated 1a [Source:ZFIN;Acc:ZDB-GENE-000210-25]	http://zfin.org/ZDB-GENE-000210-25	http://zfin.org/ZDB-GENE-000210-25	5.48164e-17	-1.12833	0.833	0.933	2
ENSDARG00000034956	myclb	MYCL proto-oncogene, bHLH transcription factor b [Source:ZFIN;Acc:ZDB-GENE-030131-5561]	http://zfin.org/ZDB-GENE-030131-5561	http://zfin.org/ZDB-GENE-030131-5561	6.25624e-20	-1.12831	0.167	0.617	2
ENSDARG00000070959	si:ch211-288g17.3	si:ch211-288g17.3 [Source:ZFIN;Acc:ZDB-GENE-030131-461]	http://zfin.org/ZDB-GENE-030131-461	http://zfin.org/ZDB-GENE-030131-461	1.22462e-13	-1.12375	0.228	0.567	2
ENSDARG00000054562	her15.1	hairy and enhancer of split-related 15, tandem duplicate 1 [Source:ZFIN;Acc:ZDB-GENE-030707-2]	http://zfin.org/ZDB-GENE-030707-2	http://zfin.org/ZDB-GENE-030707-2	1.35016e-07	-1.11614	0.079	0.117	2
ENSDARG00000055216	tuba1c	tubulin, alpha 1c [Source:ZFIN;Acc:ZDB-GENE-061114-1]	http://zfin.org/ZDB-GENE-061114-1	http://zfin.org/ZDB-GENE-061114-1	1.45031e-14	-1.11579	0.904	0.967	2
ENSDARG00000041811	rps25	ribosomal protein S25 [Source:ZFIN;Acc:ZDB-GENE-040426-1788]	http://zfin.org/ZDB-GENE-040426-1788	http://zfin.org/ZDB-GENE-040426-1788	1.25526e-26	-1.11385	0.842	0.95	2
ENSDARG00000055996	rps8a	ribosomal protein S8a [Source:ZFIN;Acc:ZDB-GENE-030131-8626]	http://zfin.org/ZDB-GENE-030131-8626	http://zfin.org/ZDB-GENE-030131-8626	1.78782e-29	-1.10531	0.965	1	2
ENSDARG00000099380	rpl13	ribosomal protein L13 [Source:ZFIN;Acc:ZDB-GENE-031007-1]	http://zfin.org/ZDB-GENE-031007-1	http://zfin.org/ZDB-GENE-031007-1	1.10237e-24	-1.10431	0.921	0.983	2
ENSDARG00000105037	snrpf	small nuclear ribonucleoprotein polypeptide F [Source:ZFIN;Acc:ZDB-GENE-040930-9]	http://zfin.org/ZDB-GENE-040930-9	http://zfin.org/ZDB-GENE-040930-9	4.55991e-21	-1.10068	0.395	0.783	2
ENSDARG00000036298	rps13	ribosomal protein S13 [Source:ZFIN;Acc:ZDB-GENE-040625-52]	http://zfin.org/ZDB-GENE-040625-52	http://zfin.org/ZDB-GENE-040625-52	3.86545e-31	-1.09823	0.974	0.967	2
ENSDARG00000003599	rpl3	ribosomal protein L3 [Source:ZFIN;Acc:ZDB-GENE-030131-1291]	http://zfin.org/ZDB-GENE-030131-1291	http://zfin.org/ZDB-GENE-030131-1291	4.85983e-27	-1.09469	0.974	1	2
ENSDARG00000036875	rps12	ribosomal protein S12 [Source:ZFIN;Acc:ZDB-GENE-030131-8951]	http://zfin.org/ZDB-GENE-030131-8951	http://zfin.org/ZDB-GENE-030131-8951	1.0915e-29	-1.08961	0.982	0.983	2
ENSDARG00000006413	rpl38	ribosomal protein L38 [Source:ZFIN;Acc:ZDB-GENE-030131-8752]	http://zfin.org/ZDB-GENE-030131-8752	http://zfin.org/ZDB-GENE-030131-8752	5.38326e-28	-1.08447	0.93	0.95	2
ENSDARG00000058105	rpl36a	ribosomal protein L36A [Source:ZFIN;Acc:ZDB-GENE-020423-1]	http://zfin.org/ZDB-GENE-020423-1	http://zfin.org/ZDB-GENE-020423-1	1.4623e-29	-1.0844	0.982	1	2
ENSDARG00000099564	atoh1b	atonal bHLH transcription factor 1b [Source:ZFIN;Acc:ZDB-GENE-041201-1]	http://zfin.org/ZDB-GENE-041201-1	http://zfin.org/ZDB-GENE-041201-1	6.34009e-11	-1.08305	0	0.35	2
ENSDARG00000036044	rps20	ribosomal protein S20 [Source:ZFIN;Acc:ZDB-GENE-040426-2284]	http://zfin.org/ZDB-GENE-040426-2284	http://zfin.org/ZDB-GENE-040426-2284	4.82737e-29	-1.07624	1	1	2
ENSDARG00000006316	rpl23a	ribosomal protein L23a [Source:ZFIN;Acc:ZDB-GENE-030131-7479]	http://zfin.org/ZDB-GENE-030131-7479	http://zfin.org/ZDB-GENE-030131-7479	5.27487e-29	-1.07617	0.807	0.95	2
ENSDARG00000077717	rpl29	ribosomal protein L29 [Source:ZFIN;Acc:ZDB-GENE-040801-167]	http://zfin.org/ZDB-GENE-040801-167	http://zfin.org/ZDB-GENE-040801-167	7.84835e-28	-1.07451	0.974	1	2
ENSDARG00000021113	ptmaa	prothymosin, alpha a [Source:ZFIN;Acc:ZDB-GENE-030131-7647]	http://zfin.org/ZDB-GENE-030131-7647	http://zfin.org/ZDB-GENE-030131-7647	2.48939e-15	-1.07184	0.728	0.85	2
ENSDARG00000039347	rps24	ribosomal protein S24 [Source:ZFIN;Acc:ZDB-GENE-040109-5]	http://zfin.org/ZDB-GENE-040109-5	http://zfin.org/ZDB-GENE-040109-5	7.47501e-26	-1.07134	0.947	0.95	2
ENSDARG00000031495	seta	SET nuclear proto-oncogene a [Source:ZFIN;Acc:ZDB-GENE-030131-2221]	http://zfin.org/ZDB-GENE-030131-2221	http://zfin.org/ZDB-GENE-030131-2221	2.76482e-18	-1.06786	0.623	0.717	2
ENSDARG00000097102	si:ch73-281n10.2	si:ch73-281n10.2 [Source:ZFIN;Acc:ZDB-GENE-131120-172]	http://zfin.org/ZDB-GENE-131120-172	http://zfin.org/ZDB-GENE-131120-172	2.38065e-15	-1.06764	0.895	0.833	2
ENSDARG00000053365	rpl31	ribosomal protein L31 [Source:ZFIN;Acc:ZDB-GENE-060331-121]	http://zfin.org/ZDB-GENE-060331-121	http://zfin.org/ZDB-GENE-060331-121	1.60476e-24	-1.06661	0.789	0.95	2
ENSDARG00000041232	rps29	ribosomal protein S29 [Source:ZFIN;Acc:ZDB-GENE-040622-5]	http://zfin.org/ZDB-GENE-040622-5	http://zfin.org/ZDB-GENE-040622-5	5.81722e-30	-1.06318	1	0.983	2
ENSDARG00000019335	hes6	hes family bHLH transcription factor 6 [Source:ZFIN;Acc:ZDB-GENE-030828-5]	http://zfin.org/ZDB-GENE-030828-5	http://zfin.org/ZDB-GENE-030828-5	6.16738e-15	-1.05828	0.105	0.55	2
ENSDARG00000008131	sox1b	SRY (sex determining region Y)-box 1b [Source:ZFIN;Acc:ZDB-GENE-060322-5]	http://zfin.org/ZDB-GENE-060322-5	http://zfin.org/ZDB-GENE-060322-5	8.52184e-14	-1.05343	0.228	0.617	2
ENSDARG00000010160	rps15a	ribosomal protein S15a [Source:ZFIN;Acc:ZDB-GENE-030131-8708]	http://zfin.org/ZDB-GENE-030131-8708	http://zfin.org/ZDB-GENE-030131-8708	6.14955e-25	-1.04858	1	1	2
ENSDARG00000015862	rpl5b	ribosomal protein L5b [Source:ZFIN;Acc:ZDB-GENE-040625-93]	http://zfin.org/ZDB-GENE-040625-93	http://zfin.org/ZDB-GENE-040625-93	1.85223e-20	-1.04778	0.649	0.833	2
ENSDARG00000004169	stmn1a	stathmin 1a [Source:ZFIN;Acc:ZDB-GENE-031006-14]	http://zfin.org/ZDB-GENE-031006-14	http://zfin.org/ZDB-GENE-031006-14	1.83431e-11	-1.04496	0.167	0.383	2
ENSDARG00000020465	ewsr1b	EWS RNA-binding protein 1b [Source:ZFIN;Acc:ZDB-GENE-030131-1600]	http://zfin.org/ZDB-GENE-030131-1600	http://zfin.org/ZDB-GENE-030131-1600	1.7229e-17	-1.03688	0.386	0.683	2
ENSDARG00000019181	rpsa	ribosomal protein SA [Source:ZFIN;Acc:ZDB-GENE-040426-811]	http://zfin.org/ZDB-GENE-040426-811	http://zfin.org/ZDB-GENE-040426-811	1.21836e-27	-1.03664	0.974	1	2
ENSDARG00000029722	hmgb2a	high mobility group box 2a [Source:ZFIN;Acc:ZDB-GENE-051120-126]	http://zfin.org/ZDB-GENE-051120-126	http://zfin.org/ZDB-GENE-051120-126	7.13218e-26	-1.03129	0.982	0.933	2
ENSDARG00000075222	amer2	APC membrane recruitment protein 2 [Source:ZFIN;Acc:ZDB-GENE-070719-5]	http://zfin.org/ZDB-GENE-070719-5	http://zfin.org/ZDB-GENE-070719-5	1.27803e-19	-1.0274	0.202	0.583	2
ENSDARG00000102995	rbm24a	RNA binding motif protein 24a [Source:ZFIN;Acc:ZDB-GENE-040628-1]	http://zfin.org/ZDB-GENE-040628-1	http://zfin.org/ZDB-GENE-040628-1	1.03916e-23	-1.02484	1	1	2
ENSDARG00000037350	rpl9	ribosomal protein L9 [Source:ZFIN;Acc:ZDB-GENE-030131-8646]	http://zfin.org/ZDB-GENE-030131-8646	http://zfin.org/ZDB-GENE-030131-8646	2.05763e-29	-1.01512	0.974	1	2
ENSDARG00000015128	rpl27	ribosomal protein L27 [Source:ZFIN;Acc:ZDB-GENE-030131-4343]	http://zfin.org/ZDB-GENE-030131-4343	http://zfin.org/ZDB-GENE-030131-4343	1.69287e-28	-1.01025	0.939	0.967	2
ENSDARG00000040184	syncrip	synaptotagmin binding, cytoplasmic RNA interacting protein [Source:ZFIN;Acc:ZDB-GENE-030131-4862]	http://zfin.org/ZDB-GENE-030131-4862	http://zfin.org/ZDB-GENE-030131-4862	7.41019e-18	-1.00868	0.579	0.85	2
ENSDARG00000010516	rpl21	ribosomal protein L21 [Source:ZFIN;Acc:ZDB-GENE-030131-8512]	http://zfin.org/ZDB-GENE-030131-8512	http://zfin.org/ZDB-GENE-030131-8512	1.10753e-24	-1.00794	0.939	0.967	2
ENSDARG00000021838	rps23	ribosomal protein S23 [Source:ZFIN;Acc:ZDB-GENE-080220-50]	http://zfin.org/ZDB-GENE-080220-50	http://zfin.org/ZDB-GENE-080220-50	1.14356e-21	-1.00632	0.886	0.95	2
ENSDARG00000039701	emx2	empty spiracles homeobox 2 [Source:ZFIN;Acc:ZDB-GENE-990415-54]	http://zfin.org/ZDB-GENE-990415-54	http://zfin.org/ZDB-GENE-990415-54	1.91422e-07	-1.00505	0.167	0.3	2
ENSDARG00000054911	tmsb	thymosin, beta [Source:ZFIN;Acc:ZDB-GENE-050307-5]	http://zfin.org/ZDB-GENE-050307-5	http://zfin.org/ZDB-GENE-050307-5	1.72603e-14	-1.00241	0.64	0.75	2
ENSDARG00000036629	rps14	ribosomal protein S14 [Source:ZFIN;Acc:ZDB-GENE-030131-8631]	http://zfin.org/ZDB-GENE-030131-8631	http://zfin.org/ZDB-GENE-030131-8631	1.10416e-21	-1.00027	0.939	0.967	2
ENSDARG00000100588	rpl36	ribosomal protein L36 [Source:ZFIN;Acc:ZDB-GENE-040622-2]	http://zfin.org/ZDB-GENE-040622-2	http://zfin.org/ZDB-GENE-040622-2	8.59467e-31	-0.995497	0.991	1	2
ENSDARG00000035860	rps28	ribosomal protein S28 [Source:ZFIN;Acc:ZDB-GENE-030131-2022]	http://zfin.org/ZDB-GENE-030131-2022	http://zfin.org/ZDB-GENE-030131-2022	1.0385e-32	-0.995495	1	1	2
ENSDARG00000011648	snrpd1	small nuclear ribonucleoprotein D1 polypeptide [Source:ZFIN;Acc:ZDB-GENE-020419-14]	http://zfin.org/ZDB-GENE-020419-14	http://zfin.org/ZDB-GENE-020419-14	9.60482e-16	-0.990169	0.439	0.75	2
ENSDARG00000026766	bcl2l10	BCL2-like 10 (apoptosis facilitator) [Source:ZFIN;Acc:ZDB-GENE-030825-2]	http://zfin.org/ZDB-GENE-030825-2	http://zfin.org/ZDB-GENE-030825-2	3.97108e-18	-0.988129	0.404	0.7	2
ENSDARG00000035692	rps3a	ribosomal protein S3A [Source:ZFIN;Acc:ZDB-GENE-030131-9184]	http://zfin.org/ZDB-GENE-030131-9184	http://zfin.org/ZDB-GENE-030131-9184	4.30304e-26	-0.986062	0.965	0.967	2
ENSDARG00000004588	sox4a	SRY (sex determining region Y)-box 4a [Source:ZFIN;Acc:ZDB-GENE-030131-8290]	http://zfin.org/ZDB-GENE-030131-8290	http://zfin.org/ZDB-GENE-030131-8290	1.72481e-09	-0.985583	0.044	0.333	2
ENSDARG00000043509	rpl11	ribosomal protein L11 [Source:ZFIN;Acc:ZDB-GENE-040625-147]	http://zfin.org/ZDB-GENE-040625-147	http://zfin.org/ZDB-GENE-040625-147	8.84593e-32	-0.984957	1	1	2
ENSDARG00000011125	snrpb	small nuclear ribonucleoprotein polypeptides B and B1 [Source:ZFIN;Acc:ZDB-GENE-040426-1819]	http://zfin.org/ZDB-GENE-040426-1819	http://zfin.org/ZDB-GENE-040426-1819	3.53874e-18	-0.98486	0.518	0.75	2
ENSDARG00000014690	rps4x	ribosomal protein S4, X-linked [Source:ZFIN;Acc:ZDB-GENE-040927-19]	http://zfin.org/ZDB-GENE-040927-19	http://zfin.org/ZDB-GENE-040927-19	8.96175e-25	-0.979285	0.956	0.983	2
ENSDARG00000036162	hnrnpa0b	heterogeneous nuclear ribonucleoprotein A0b [Source:ZFIN;Acc:ZDB-GENE-030131-6154]	http://zfin.org/ZDB-GENE-030131-6154	http://zfin.org/ZDB-GENE-030131-6154	2.2158e-16	-0.978856	0.816	0.917	2
ENSDARG00000013938	psmb3	proteasome subunit beta 3 [Source:ZFIN;Acc:ZDB-GENE-040426-2682]	http://zfin.org/ZDB-GENE-040426-2682	http://zfin.org/ZDB-GENE-040426-2682	4.47682e-16	-0.978305	0.57	0.8	2
ENSDARG00000041435	uba52	ubiquitin A-52 residue ribosomal protein fusion product 1 [Source:ZFIN;Acc:ZDB-GENE-051023-7]	http://zfin.org/ZDB-GENE-051023-7	http://zfin.org/ZDB-GENE-051023-7	1.9398e-16	-0.978021	0.746	0.933	2
ENSDARG00000034897	rps10	ribosomal protein S10 [Source:ZFIN;Acc:ZDB-GENE-040426-1481]	http://zfin.org/ZDB-GENE-040426-1481	http://zfin.org/ZDB-GENE-040426-1481	5.83995e-19	-0.976737	0.939	0.967	2
ENSDARG00000102317	rpl26	ribosomal protein L26 [Source:ZFIN;Acc:ZDB-GENE-040426-2117]	http://zfin.org/ZDB-GENE-040426-2117	http://zfin.org/ZDB-GENE-040426-2117	2.60667e-30	-0.975814	0.982	1	2
ENSDARG00000029500	rpl34	ribosomal protein L34 [Source:ZFIN;Acc:ZDB-GENE-040426-1033]	http://zfin.org/ZDB-GENE-040426-1033	http://zfin.org/ZDB-GENE-040426-1033	9.47268e-30	-0.972874	0.991	0.967	2
ENSDARG00000006691	rpl12	ribosomal protein L12 [Source:ZFIN;Acc:ZDB-GENE-030131-5297]	http://zfin.org/ZDB-GENE-030131-5297	http://zfin.org/ZDB-GENE-030131-5297	4.75437e-23	-0.969197	0.956	0.95	2
ENSDARG00000037071	rps26	ribosomal protein S26 [Source:ZFIN;Acc:ZDB-GENE-030131-8606]	http://zfin.org/ZDB-GENE-030131-8606	http://zfin.org/ZDB-GENE-030131-8606	1.28079e-20	-0.961835	0.904	0.95	2
ENSDARG00000043453	rps5	ribosomal protein S5 [Source:ZFIN;Acc:ZDB-GENE-020419-12]	http://zfin.org/ZDB-GENE-020419-12	http://zfin.org/ZDB-GENE-020419-12	2.88848e-23	-0.959141	0.947	0.983	2
ENSDARG00000016038	hacd3	3-hydroxyacyl-CoA dehydratase 3 [Source:ZFIN;Acc:ZDB-GENE-040426-1200]	http://zfin.org/ZDB-GENE-040426-1200	http://zfin.org/ZDB-GENE-040426-1200	1.8199e-12	-0.949895	0.518	0.733	2
ENSDARG00000077732	alyref	Aly/REF export factor [Source:ZFIN;Acc:ZDB-GENE-070928-29]	http://zfin.org/ZDB-GENE-070928-29	http://zfin.org/ZDB-GENE-070928-29	4.26624e-14	-0.947261	0.237	0.567	2
ENSDARG00000033175	snrpe	small nuclear ribonucleoprotein polypeptide E [Source:ZFIN;Acc:ZDB-GENE-040426-1112]	http://zfin.org/ZDB-GENE-040426-1112	http://zfin.org/ZDB-GENE-040426-1112	4.12364e-17	-0.942906	0.719	0.9	2
ENSDARG00000103007	rps3	ribosomal protein S3 [Source:ZFIN;Acc:ZDB-GENE-030131-8494]	http://zfin.org/ZDB-GENE-030131-8494	http://zfin.org/ZDB-GENE-030131-8494	6.56842e-22	-0.942044	0.868	0.9	2
ENSDARG00000091937	BX927308.1		http://zfin.org/	http://zfin.org/	1.4436e-13	-0.941512	0.64	0.8	2
ENSDARG00000100392	rps18	ribosomal protein S18 [Source:ZFIN;Acc:ZDB-GENE-020419-20]	http://zfin.org/ZDB-GENE-020419-20	http://zfin.org/ZDB-GENE-020419-20	8.13871e-23	-0.940128	0.947	0.983	2
ENSDARG00000003920	setb	SET nuclear proto-oncogene b [Source:ZFIN;Acc:ZDB-GENE-030131-433]	http://zfin.org/ZDB-GENE-030131-433	http://zfin.org/ZDB-GENE-030131-433	5.87593e-19	-0.935309	0.605	0.75	2
ENSDARG00000006672	fam49a	zinc finger protein 395 [Source:ZFIN;Acc:ZDB-GENE-031002-50]	http://zfin.org/ZDB-GENE-031002-50	http://zfin.org/ZDB-GENE-031002-50	4.51164e-14	-0.931539	0.105	0.55	2
ENSDARG00000076283	snrpd3l	small nuclear ribonucleoprotein D3 polypeptide, like [Source:ZFIN;Acc:ZDB-GENE-030131-5219]	http://zfin.org/ZDB-GENE-030131-5219	http://zfin.org/ZDB-GENE-030131-5219	7.85626e-16	-0.930956	0.421	0.75	2
ENSDARG00000010246	prmt1	protein arginine methyltransferase 1 [Source:ZFIN;Acc:ZDB-GENE-030131-693]	http://zfin.org/ZDB-GENE-030131-693	http://zfin.org/ZDB-GENE-030131-693	3.0818e-17	-0.927673	0.368	0.633	2
ENSDARG00000010244	rpl22l1	ribosomal protein L22-like 1 [Source:ZFIN;Acc:ZDB-GENE-060804-3]	http://zfin.org/ZDB-GENE-060804-3	http://zfin.org/ZDB-GENE-060804-3	4.86963e-15	-0.924778	0.544	0.867	2
ENSDARG00000068820	h2afva	H2A histone family, member Va [Source:ZFIN;Acc:ZDB-GENE-020717-1]	http://zfin.org/ZDB-GENE-020717-1	http://zfin.org/ZDB-GENE-020717-1	3.64029e-13	-0.924287	0.368	0.767	2
ENSDARG00000091656	lsm8	LSM8 homolog, U6 small nuclear RNA associated [Source:ZFIN;Acc:ZDB-GENE-070629-3]	http://zfin.org/ZDB-GENE-070629-3	http://zfin.org/ZDB-GENE-070629-3	1.02352e-11	-0.921833	0.404	0.75	2
ENSDARG00000032725	rps27a	ribosomal protein S27a [Source:ZFIN;Acc:ZDB-GENE-030131-10018]	http://zfin.org/ZDB-GENE-030131-10018	http://zfin.org/ZDB-GENE-030131-10018	1.27736e-20	-0.921646	0.939	0.983	2
ENSDARG00000101560	psma1	proteasome subunit alpha 1 [Source:ZFIN;Acc:ZDB-GENE-040801-15]	http://zfin.org/ZDB-GENE-040801-15	http://zfin.org/ZDB-GENE-040801-15	2.12588e-15	-0.921509	0.614	0.817	2
ENSDARG00000037879	lfng	LFNG O-fucosylpeptide 3-beta-N-acetylglucosaminyltransferase [Source:ZFIN;Acc:ZDB-GENE-980605-16]	http://zfin.org/ZDB-GENE-980605-16	http://zfin.org/ZDB-GENE-980605-16	3.69152e-07	-0.920521	0.167	0.367	2
ENSDARG00000014867	rpl8	ribosomal protein L8 [Source:ZFIN;Acc:ZDB-GENE-040426-1670]	http://zfin.org/ZDB-GENE-040426-1670	http://zfin.org/ZDB-GENE-040426-1670	3.41572e-24	-0.917542	0.974	0.983	2
ENSDARG00000020850	eef1a1l2	eukaryotic translation elongation factor 1 alpha 1, like 2 [Source:ZFIN;Acc:ZDB-GENE-050706-188]	http://zfin.org/ZDB-GENE-990415-52	http://zfin.org/ZDB-GENE-990415-52	5.98239e-26	-0.915146	1	1	2
ENSDARG00000056119	eef1g	eukaryotic translation elongation factor 1 gamma [Source:ZFIN;Acc:ZDB-GENE-020423-3]	http://zfin.org/ZDB-GENE-020423-3	http://zfin.org/ZDB-GENE-020423-3	2.40906e-20	-0.911246	0.895	0.917	2
ENSDARG00000091756	insm1a	insulinoma-associated 1a [Source:ZFIN;Acc:ZDB-GENE-040426-1810]	http://zfin.org/ZDB-GENE-040426-1810	http://zfin.org/ZDB-GENE-040426-1810	7.14572e-06	-0.910666	0.018	0.2	2
ENSDARG00000015111	ddx39ab	DEAD (Asp-Glu-Ala-Asp) box polypeptide 39Ab [Source:ZFIN;Acc:ZDB-GENE-040426-2902]	http://zfin.org/ZDB-GENE-040426-2902	http://zfin.org/ZDB-GENE-040426-2902	2.1874e-11	-0.905757	0.395	0.717	2
ENSDARG00000053457	rpl23	ribosomal protein L23 [Source:ZFIN;Acc:ZDB-GENE-030131-8756]	http://zfin.org/ZDB-GENE-030131-8756	http://zfin.org/ZDB-GENE-030131-8756	2.38401e-26	-0.899926	1	0.967	2
ENSDARG00000037962	psmb7	proteasome subunit beta 7 [Source:ZFIN;Acc:ZDB-GENE-001208-4]	http://zfin.org/ZDB-GENE-001208-4	http://zfin.org/ZDB-GENE-001208-4	6.11541e-17	-0.898393	0.816	0.917	2
ENSDARG00000030602	rps19	ribosomal protein S19 [Source:ZFIN;Acc:ZDB-GENE-040426-1716]	http://zfin.org/ZDB-GENE-040426-1716	http://zfin.org/ZDB-GENE-040426-1716	2.75671e-28	-0.897312	1	1	2
ENSDARG00000007320	rpl7	ribosomal protein L7 [Source:ZFIN;Acc:ZDB-GENE-030131-8654]	http://zfin.org/ZDB-GENE-030131-8654	http://zfin.org/ZDB-GENE-030131-8654	3.948e-26	-0.894183	0.991	0.983	2
ENSDARG00000104011	rps17	ribosomal protein S17 [Source:ZFIN;Acc:ZDB-GENE-040426-1852]	http://zfin.org/ZDB-GENE-040426-1852	http://zfin.org/ZDB-GENE-040426-1852	1.55677e-13	-0.892691	0.614	0.867	2
ENSDARG00000003526	psma5	proteasome subunit alpha 5 [Source:ZFIN;Acc:ZDB-GENE-040625-96]	http://zfin.org/ZDB-GENE-040625-96	http://zfin.org/ZDB-GENE-040625-96	3.01838e-18	-0.890081	0.518	0.767	2
ENSDARG00000029533	rpl18	ribosomal protein L18 [Source:ZFIN;Acc:ZDB-GENE-040801-165]	http://zfin.org/ZDB-GENE-040801-165	http://zfin.org/ZDB-GENE-040801-165	4.01507e-20	-0.887636	0.982	1	2
ENSDARG00000019778	rps6	ribosomal protein S6 [Source:ZFIN;Acc:ZDB-GENE-040801-8]	http://zfin.org/ZDB-GENE-040801-8	http://zfin.org/ZDB-GENE-040801-8	7.10761e-21	-0.886453	0.982	0.983	2
ENSDARG00000015427	hdac1	histone deacetylase 1 [Source:ZFIN;Acc:ZDB-GENE-020419-32]	http://zfin.org/ZDB-GENE-020419-32	http://zfin.org/ZDB-GENE-020419-32	6.13796e-17	-0.874558	0.596	0.65	2
ENSDARG00000055294	atoh1a	atonal bHLH transcription factor 1a [Source:ZFIN;Acc:ZDB-GENE-990415-17]	http://zfin.org/ZDB-GENE-990415-17	http://zfin.org/ZDB-GENE-990415-17	1.5689e-10	-0.874079	0.605	0.9	2
ENSDARG00000092115	eif4a1a	eukaryotic translation initiation factor 4A1A [Source:ZFIN;Acc:ZDB-GENE-031030-2]	http://zfin.org/ZDB-GENE-031030-2	http://zfin.org/ZDB-GENE-031030-2	2.28539e-10	-0.873907	0.377	0.55	2
ENSDARG00000030408	rps26l	ribosomal protein S26, like [Source:ZFIN;Acc:ZDB-GENE-040426-1706]	http://zfin.org/ZDB-GENE-040426-1706	http://zfin.org/ZDB-GENE-040426-1706	1.43809e-23	-0.871325	0.86	0.917	2
ENSDARG00000002240	psmb6	proteasome subunit beta 6 [Source:ZFIN;Acc:ZDB-GENE-990415-216]	http://zfin.org/ZDB-GENE-990415-216	http://zfin.org/ZDB-GENE-990415-216	4.5726e-15	-0.868363	0.711	0.833	2
ENSDARG00000099022	faua	Finkel-Biskis-Reilly murine sarcoma virus (FBR-MuSV) ubiquitously expressed a [Source:ZFIN;Acc:ZDB-GENE-040426-1700]	http://zfin.org/ZDB-GENE-040426-1700	http://zfin.org/ZDB-GENE-040426-1700	1.34074e-22	-0.863932	0.982	0.983	2
ENSDARG00000060679	kdm1a	lysine (K)-specific demethylase 1a [Source:ZFIN;Acc:ZDB-GENE-030131-7828]	http://zfin.org/ZDB-GENE-030131-7828	http://zfin.org/ZDB-GENE-030131-7828	5.35298e-12	-0.863926	0.158	0.45	2
ENSDARG00000008803	marcksb	myristoylated alanine-rich protein kinase C substrate b [Source:ZFIN;Acc:ZDB-GENE-030131-1921]	http://zfin.org/ZDB-GENE-030131-1921	http://zfin.org/ZDB-GENE-030131-1921	2.64713e-12	-0.863887	0.088	0.35	2
ENSDARG00000025581	rpl10	ribosomal protein L10 [Source:ZFIN;Acc:ZDB-GENE-030131-8656]	http://zfin.org/ZDB-GENE-030131-8656	http://zfin.org/ZDB-GENE-030131-8656	1.77875e-25	-0.863836	0.956	0.95	2
ENSDARG00000057556	rpl17	ribosomal protein L17 [Source:ZFIN;Acc:ZDB-GENE-030131-8585]	http://zfin.org/ZDB-GENE-030131-8585	http://zfin.org/ZDB-GENE-030131-8585	1.54483e-17	-0.862534	0.904	0.917	2
ENSDARG00000020197	rpl5a	ribosomal protein L5a [Source:ZFIN;Acc:ZDB-GENE-030131-5161]	http://zfin.org/ZDB-GENE-030131-5161	http://zfin.org/ZDB-GENE-030131-5161	3.39049e-15	-0.862221	0.719	0.883	2
ENSDARG00000093606	RPS11 (1 of many)	si:dkey-159f12.2 [Source:ZFIN;Acc:ZDB-GENE-081105-168]	http://zfin.org/ZDB-GENE-081105-168	http://zfin.org/ZDB-GENE-081105-168	2.28041e-15	-0.861338	0.781	0.85	2
ENSDARG00000098458	RPL37A	zgc:171772 [Source:ZFIN;Acc:ZDB-GENE-070928-31]	http://zfin.org/ZDB-GENE-070928-31	http://zfin.org/ZDB-GENE-070928-31	1.7772e-27	-0.86091	1	1	2
ENSDARG00000036316	rpl39	ribosomal protein L39 [Source:ZFIN;Acc:ZDB-GENE-040625-51]	http://zfin.org/ZDB-GENE-040625-51	http://zfin.org/ZDB-GENE-040625-51	2.4449e-23	-0.857217	0.991	1	2
ENSDARG00000074030	myt1a	myelin transcription factor 1a [Source:ZFIN;Acc:ZDB-GENE-030131-3885]	http://zfin.org/ZDB-GENE-030131-3885	http://zfin.org/ZDB-GENE-030131-3885	1.21542e-14	-0.855939	0.184	0.45	2
ENSDARG00000071590	si:ch211-236g6.1	si:ch211-236g6.1 [Source:ZFIN;Acc:ZDB-GENE-050208-448]	http://zfin.org/ZDB-GENE-050208-448	http://zfin.org/ZDB-GENE-050208-448	1.96394e-07	-0.855182	0.035	0.333	2
ENSDARG00000009285	rpl15	ribosomal protein L15 [Source:ZFIN;Acc:ZDB-GENE-040801-183]	http://zfin.org/ZDB-GENE-071004-16	http://zfin.org/ZDB-GENE-071004-16	1.7202e-23	-0.85383	0.991	0.95	2
ENSDARG00000086327	srrm4	serine/arginine repetitive matrix 4 [Source:ZFIN;Acc:ZDB-GENE-050208-34]	http://zfin.org/ZDB-GENE-050208-34	http://zfin.org/ZDB-GENE-050208-34	3.1464e-09	-0.852957	0.079	0.383	2
ENSDARG00000059360	srsf3b	serine/arginine-rich splicing factor 3b [Source:ZFIN;Acc:ZDB-GENE-071005-2]	http://zfin.org/ZDB-GENE-071005-2	http://zfin.org/ZDB-GENE-071005-2	3.56187e-15	-0.848853	0.702	0.9	2
ENSDARG00000019230	rpl7a	ribosomal protein L7a [Source:ZFIN;Acc:ZDB-GENE-031001-9]	http://zfin.org/ZDB-GENE-031001-9	http://zfin.org/ZDB-GENE-031001-9	5.99356e-20	-0.847652	0.982	1	2
ENSDARG00000056732	her4.1	hairy-related 4, tandem duplicate 1 [Source:ZFIN;Acc:ZDB-GENE-980526-521]	http://zfin.org/ZDB-GENE-980526-521	http://zfin.org/ZDB-GENE-980526-521	1.42896e-07	-0.846374	0.061	0.133	2
ENSDARG00000017624	krt4	keratin 4 [Source:ZFIN;Acc:ZDB-GENE-000607-83]	http://zfin.org/ZDB-GENE-000607-83	http://zfin.org/ZDB-GENE-000607-83	4.90521e-12	-0.8441	0.904	0.883	2
ENSDARG00000014591	ilf2	interleukin enhancer binding factor 2 [Source:ZFIN;Acc:ZDB-GENE-040426-2345]	http://zfin.org/ZDB-GENE-040426-2345	http://zfin.org/ZDB-GENE-040426-2345	1.65898e-12	-0.842946	0.491	0.733	2
ENSDARG00000059337	tgif1	TGFB-induced factor homeobox 1 [Source:ZFIN;Acc:ZDB-GENE-030131-475]	http://zfin.org/ZDB-GENE-030131-475	http://zfin.org/ZDB-GENE-030131-475	2.35586e-07	-0.842465	0.044	0.333	2
ENSDARG00000103672	cirbpa	cold inducible RNA binding protein a [Source:ZFIN;Acc:ZDB-GENE-050417-329]	http://zfin.org/ZDB-GENE-050417-329	http://zfin.org/ZDB-GENE-050417-329	1.47422e-14	-0.84176	0.991	0.967	2
ENSDARG00000042566	rps7	ribosomal protein S7 [Source:ZFIN;Acc:ZDB-GENE-040426-1718]	http://zfin.org/ZDB-GENE-040426-1718	http://zfin.org/ZDB-GENE-040426-1718	7.42098e-22	-0.840714	0.991	1	2
ENSDARG00000009640	psmb1	proteasome subunit beta 1 [Source:ZFIN;Acc:ZDB-GENE-040618-2]	http://zfin.org/ZDB-GENE-040618-2	http://zfin.org/ZDB-GENE-040618-2	4.58846e-14	-0.840635	0.772	0.883	2
ENSDARG00000032296	pomp	proteasome maturation protein [Source:ZFIN;Acc:ZDB-GENE-040801-10]	http://zfin.org/ZDB-GENE-040801-10	http://zfin.org/ZDB-GENE-040801-10	3.25969e-14	-0.837613	0.772	0.9	2
ENSDARG00000018334	rpl35	ribosomal protein L35 [Source:ZFIN;Acc:ZDB-GENE-020419-2]	http://zfin.org/ZDB-GENE-020419-2	http://zfin.org/ZDB-GENE-020419-2	3.71212e-19	-0.835521	0.956	0.967	2
ENSDARG00000053058	rps11	ribosomal protein S11 [Source:ZFIN;Acc:ZDB-GENE-040426-2701]	http://zfin.org/ZDB-GENE-040426-2701	http://zfin.org/ZDB-GENE-040426-2701	2.83217e-20	-0.83494	0.991	0.967	2
ENSDARG00000013351	cirbpb	cold inducible RNA binding protein b [Source:ZFIN;Acc:ZDB-GENE-030131-5841]	http://zfin.org/ZDB-GENE-030131-5841	http://zfin.org/ZDB-GENE-030131-5841	6.13694e-16	-0.834674	0.965	0.95	2
ENSDARG00000045487	rps16	ribosomal protein S16 [Source:ZFIN;Acc:ZDB-GENE-050506-107]	http://zfin.org/ZDB-GENE-050506-107	http://zfin.org/ZDB-GENE-050506-107	3.483e-22	-0.834554	1	0.983	2
ENSDARG00000002791	atp1a1a.1	ATPase, Na+/K+ transporting, alpha 1a polypeptide, tandem duplicate 1 [Source:ZFIN;Acc:ZDB-GENE-001212-1]	http://zfin.org/ZDB-GENE-001212-1	http://zfin.org/ZDB-GENE-001212-1	9.36777e-08	-0.832826	0.377	0.717	2
ENSDARG00000041182	rpl4	ribosomal protein L4 [Source:ZFIN;Acc:ZDB-GENE-030131-9034]	http://zfin.org/ZDB-GENE-030131-9034	http://zfin.org/ZDB-GENE-030131-9034	1.90977e-14	-0.832381	0.772	0.9	2
ENSDARG00000103433	rpl14	ribosomal protein L14 [Source:ZFIN;Acc:ZDB-GENE-030131-2085]	http://zfin.org/ZDB-GENE-030131-2085	http://zfin.org/ZDB-GENE-030131-2085	1.45828e-12	-0.832165	0.746	0.867	2
ENSDARG00000040440	snrpd2	small nuclear ribonucleoprotein D2 polypeptide [Source:ZFIN;Acc:ZDB-GENE-040914-10]	http://zfin.org/ZDB-GENE-040914-10	http://zfin.org/ZDB-GENE-040914-10	1.87162e-15	-0.828693	0.553	0.7	2
ENSDARG00000018124	psmd3	proteasome 26S subunit, non-ATPase 3 [Source:ZFIN;Acc:ZDB-GENE-040426-1444]	http://zfin.org/ZDB-GENE-040426-1444	http://zfin.org/ZDB-GENE-040426-1444	1.5845e-14	-0.828213	0.579	0.767	2
ENSDARG00000023298	rps27.1	ribosomal protein S27, isoform 1 [Source:ZFIN;Acc:ZDB-GENE-050522-549]	http://zfin.org/ZDB-GENE-050522-549	http://zfin.org/ZDB-GENE-050522-549	3.941e-20	-0.827945	0.991	1	2
ENSDARG00000022129	rbm4.3	RNA binding motif protein 4.3 [Source:ZFIN;Acc:ZDB-GENE-040426-1938]	http://zfin.org/ZDB-GENE-040426-1938	http://zfin.org/ZDB-GENE-040426-1938	6.04457e-18	-0.827858	0.711	0.75	2
ENSDARG00000044375	zgc:158291	zgc:158291 [Source:ZFIN;Acc:ZDB-GENE-061215-70]	http://zfin.org/ZDB-GENE-061215-70	http://zfin.org/ZDB-GENE-061215-70	1.45586e-06	-0.827586	0.412	0.633	2
ENSDARG00000014244	rbmx	RNA binding motif protein, X-linked [Source:ZFIN;Acc:ZDB-GENE-030131-579]	http://zfin.org/ZDB-GENE-030131-579	http://zfin.org/ZDB-GENE-030131-579	1.14537e-12	-0.825299	0.368	0.65	2
ENSDARG00000102417	psmd7	proteasome 26S subunit, non-ATPase 7 [Source:ZFIN;Acc:ZDB-GENE-030131-5541]	http://zfin.org/ZDB-GENE-030131-5541	http://zfin.org/ZDB-GENE-030131-5541	1.10225e-13	-0.819965	0.482	0.733	2
ENSDARG00000099667	snrpg	small nuclear ribonucleoprotein polypeptide G [Source:ZFIN;Acc:ZDB-GENE-040912-105]	http://zfin.org/ZDB-GENE-040912-105	http://zfin.org/ZDB-GENE-040912-105	1.65599e-10	-0.818815	0.333	0.65	2
ENSDARG00000070046	eny2	enhancer of yellow 2 homolog (Drosophila) [Source:ZFIN;Acc:ZDB-GENE-040718-124]	http://zfin.org/ZDB-GENE-040718-124	http://zfin.org/ZDB-GENE-040718-124	9.54605e-11	-0.81731	0.219	0.6	2
ENSDARG00000042905	rpl10a	ribosomal protein L10a [Source:ZFIN;Acc:ZDB-GENE-030131-2025]	http://zfin.org/ZDB-GENE-030131-2025	http://zfin.org/ZDB-GENE-030131-2025	3.72668e-19	-0.81577	1	0.967	2
ENSDARG00000006497	rtn1a	reticulon 1a [Source:ZFIN;Acc:ZDB-GENE-030131-2426]	http://zfin.org/ZDB-GENE-030131-2426	http://zfin.org/ZDB-GENE-030131-2426	2.76338e-09	-0.806808	0.193	0.55	2
ENSDARG00000004754	hspa4a	heat shock protein 4a [Source:ZFIN;Acc:ZDB-GENE-040426-2832]	http://zfin.org/ZDB-GENE-040426-2832	http://zfin.org/ZDB-GENE-040426-2832	9.72031e-11	-0.804745	0.184	0.55	2
ENSDARG00000020504	h3f3b.1	H3 histone, family 3B.1 [Source:ZFIN;Acc:ZDB-GENE-050417-65]	http://zfin.org/ZDB-GENE-040426-1928	http://zfin.org/ZDB-GENE-040426-1928	2.21867e-18	-0.803102	0.912	0.967	2
ENSDARG00000051783	rplp0	ribosomal protein, large, P0 [Source:ZFIN;Acc:ZDB-GENE-000629-1]	http://zfin.org/ZDB-GENE-000629-1	http://zfin.org/ZDB-GENE-000629-1	1.3291e-15	-0.803048	0.965	0.95	2
ENSDARG00000022684	fkbp1aa	FK506 binding protein 1Aa [Source:ZFIN;Acc:ZDB-GENE-030131-7275]	http://zfin.org/ZDB-GENE-030131-7275	http://zfin.org/ZDB-GENE-030131-7275	1.12921e-19	-0.801534	0.93	0.867	2
ENSDARG00000062103	ankrd24	ankyrin repeat domain 24 [Source:ZFIN;Acc:ZDB-GENE-050208-747]	http://zfin.org/ZDB-GENE-050208-747	http://zfin.org/ZDB-GENE-050208-747	3.86423e-11	-0.797362	0.158	0.5	2
ENSDARG00000070849	rps15	ribosomal protein S15 [Source:ZFIN;Acc:ZDB-GENE-030131-9092]	http://zfin.org/ZDB-GENE-030131-9092	http://zfin.org/ZDB-GENE-030131-9092	8.3495e-20	-0.797275	0.982	0.983	2
ENSDARG00000041619	gnb2l1	guanine nucleotide binding protein (G protein), beta polypeptide 2-like 1 [Source:ZFIN;Acc:ZDB-GENE-990415-89]	http://zfin.org/ZDB-GENE-990415-89	http://zfin.org/ZDB-GENE-990415-89	1.83595e-15	-0.797185	0.939	0.983	2
ENSDARG00000016855	sf3b5	splicing factor 3b, subunit 5 [Source:ZFIN;Acc:ZDB-GENE-040718-181]	http://zfin.org/ZDB-GENE-040718-181	http://zfin.org/ZDB-GENE-040718-181	6.86189e-12	-0.796214	0.325	0.65	2
ENSDARG00000054696	psmb4	proteasome subunit beta 4 [Source:ZFIN;Acc:ZDB-GENE-050417-333]	http://zfin.org/ZDB-GENE-050417-333	http://zfin.org/ZDB-GENE-050417-333	6.0409e-15	-0.795905	0.649	0.833	2
ENSDARG00000045155	phf5a	PHD finger protein 5A [Source:ZFIN;Acc:ZDB-GENE-021219-3]	http://zfin.org/ZDB-GENE-021219-3	http://zfin.org/ZDB-GENE-021219-3	2.93298e-11	-0.794771	0.36	0.6	2
ENSDARG00000019398	psma6a	proteasome subunit alpha 6a [Source:ZFIN;Acc:ZDB-GENE-020326-1]	http://zfin.org/ZDB-GENE-020326-1	http://zfin.org/ZDB-GENE-020326-1	1.02241e-12	-0.792151	0.509	0.7	2
ENSDARG00000086618	psma3	proteasome subunit alpha 3 [Source:ZFIN;Acc:ZDB-GENE-050913-120]	http://zfin.org/ZDB-GENE-050913-120	http://zfin.org/ZDB-GENE-050913-120	8.39203e-16	-0.791647	0.789	0.833	2
ENSDARG00000025073	rpl18a	ribosomal protein L18a [Source:ZFIN;Acc:ZDB-GENE-040426-1071]	http://zfin.org/ZDB-GENE-040426-1071	http://zfin.org/ZDB-GENE-040426-1071	2.53471e-23	-0.790588	1	0.983	2
ENSDARG00000008049	si:dkey-42i9.4	si:dkey-42i9.4 [Source:ZFIN;Acc:ZDB-GENE-030131-8398]	http://zfin.org/ZDB-GENE-030131-8398	http://zfin.org/ZDB-GENE-030131-8398	2.79469e-08	-0.7899	0.325	0.5	2
ENSDARG00000062756	pllp	plasmolipin [Source:ZFIN;Acc:ZDB-GENE-050419-195]	http://zfin.org/ZDB-GENE-050419-195	http://zfin.org/ZDB-GENE-050419-195	9.22831e-14	-0.788341	0.456	0.717	2
ENSDARG00000027196	si:dkey-16l2.17	si:dkey-16l2.17 [Source:ZFIN;Acc:ZDB-GENE-141212-262]	http://zfin.org/ZDB-GENE-141212-262	http://zfin.org/ZDB-GENE-141212-262	4.76039e-08	-0.787575	0.193	0.533	2
ENSDARG00000017235	eif5a	eukaryotic translation initiation factor 5A [Source:ZFIN;Acc:ZDB-GENE-040426-2229]	http://zfin.org/ZDB-GENE-040426-2229	http://zfin.org/ZDB-GENE-040426-2229	2.43671e-15	-0.787236	0.658	0.733	2
ENSDARG00000091771	lysmd2	LysM, putative peptidoglycan-binding, domain containing 2 [Source:ZFIN;Acc:ZDB-GENE-040801-250]	http://zfin.org/ZDB-GENE-040801-250	http://zfin.org/ZDB-GENE-040801-250	3.44491e-10	-0.785937	0.561	0.767	2
ENSDARG00000040534	epcam	epithelial cell adhesion molecule [Source:ZFIN;Acc:ZDB-GENE-040426-2209]	http://zfin.org/ZDB-GENE-040426-2209	http://zfin.org/ZDB-GENE-040426-2209	4.47529e-12	-0.78426	0.974	0.967	2
ENSDARG00000035871	rpl30	ribosomal protein L30 [Source:ZFIN;Acc:ZDB-GENE-030131-8657]	http://zfin.org/ZDB-GENE-030131-8657	http://zfin.org/ZDB-GENE-030131-8657	4.87147e-18	-0.778312	0.991	0.983	2
ENSDARG00000057854	sap18	Sin3A-associated protein [Source:ZFIN;Acc:ZDB-GENE-040426-1679]	http://zfin.org/ZDB-GENE-040426-1679	http://zfin.org/ZDB-GENE-040426-1679	1.0687e-11	-0.775322	0.588	0.833	2
ENSDARG00000059357	sarnp	SAP domain containing ribonucleoprotein [Source:ZFIN;Acc:ZDB-GENE-050522-161]	http://zfin.org/ZDB-GENE-050522-161	http://zfin.org/ZDB-GENE-050522-161	3.23083e-09	-0.775153	0.175	0.5	2
ENSDARG00000044093	rpl13a	ribosomal protein L13a [Source:ZFIN;Acc:ZDB-GENE-030131-168]	http://zfin.org/ZDB-GENE-030131-168	http://zfin.org/ZDB-GENE-030131-168	9.20292e-18	-0.773854	0.842	0.917	2
ENSDARG00000039830	gng5	guanine nucleotide binding protein (G protein), gamma 5 [Source:ZFIN;Acc:ZDB-GENE-030131-9966]	http://zfin.org/ZDB-GENE-030131-9966	http://zfin.org/ZDB-GENE-030131-9966	7.3132e-09	-0.762553	0.316	0.6	2
ENSDARG00000021124	cfl1	cofilin 1 [Source:ZFIN;Acc:ZDB-GENE-030131-215]	http://zfin.org/ZDB-GENE-030131-215	http://zfin.org/ZDB-GENE-030131-215	6.87681e-10	-0.762474	0.86	0.867	2
ENSDARG00000052377	psmd12	proteasome 26S subunit, non-ATPase 12 [Source:ZFIN;Acc:ZDB-GENE-030131-617]	http://zfin.org/ZDB-GENE-030131-617	http://zfin.org/ZDB-GENE-030131-617	8.62189e-08	-0.762229	0.219	0.567	2
ENSDARG00000067975	atpif1a	ATPase inhibitory factor 1a [Source:ZFIN;Acc:ZDB-GENE-070410-36]	http://zfin.org/ZDB-GENE-070410-36	http://zfin.org/ZDB-GENE-070410-36	3.73026e-09	-0.760636	0.614	0.817	2
ENSDARG00000054818	rpl32	ribosomal protein L32 [Source:ZFIN;Acc:ZDB-GENE-060331-105]	http://zfin.org/ZDB-GENE-060331-105	http://zfin.org/ZDB-GENE-060331-105	3.28854e-24	-0.758596	1	1	2
ENSDARG00000035325	srsf7a	serine/arginine-rich splicing factor 7a [Source:ZFIN;Acc:ZDB-GENE-040426-1798]	http://zfin.org/ZDB-GENE-040426-1798	http://zfin.org/ZDB-GENE-040426-1798	1.18175e-14	-0.757836	0.482	0.65	2
ENSDARG00000046157	RPS17	zgc:114188 [Source:ZFIN;Acc:ZDB-GENE-050320-15]	http://zfin.org/ZDB-GENE-050320-15	http://zfin.org/ZDB-GENE-050320-15	1.70556e-16	-0.755919	0.965	0.967	2
ENSDARG00000016239	psmd13	proteasome 26S subunit, non-ATPase 13 [Source:ZFIN;Acc:ZDB-GENE-040426-1004]	http://zfin.org/ZDB-GENE-040426-1004	http://zfin.org/ZDB-GENE-040426-1004	1.88328e-11	-0.753608	0.474	0.683	2
ENSDARG00000044521	eef1b2	eukaryotic translation elongation factor 1 beta 2 [Source:ZFIN;Acc:ZDB-GENE-030131-7310]	http://zfin.org/ZDB-GENE-030131-7310	http://zfin.org/ZDB-GENE-030131-7310	5.36368e-23	-0.752762	0.93	0.883	2
ENSDARG00000019741	si:ch211-152f23.5	si:ch211-152f23.5 [Source:ZFIN;Acc:ZDB-GENE-080917-47]	http://zfin.org/ZDB-GENE-080917-47	http://zfin.org/ZDB-GENE-080917-47	1.6528e-09	-0.750995	0.368	0.4	2
ENSDARG00000003860	cbx3a	chromobox homolog 3a (HP1 gamma homolog, Drosophila) [Source:ZFIN;Acc:ZDB-GENE-030131-1158]	http://zfin.org/ZDB-GENE-030131-1158	http://zfin.org/ZDB-GENE-030131-1158	2.1231e-11	-0.75049	0.333	0.583	2
ENSDARG00000051886	ankrd11	ankyrin repeat domain 11 [Source:ZFIN;Acc:ZDB-GENE-030131-3932]	http://zfin.org/ZDB-GENE-030131-3932	http://zfin.org/ZDB-GENE-030131-3932	4.07782e-09	-0.747133	0.342	0.583	2
ENSDARG00000031435	zgc:56493	zgc:56493 [Source:ZFIN;Acc:ZDB-GENE-030131-8581]	http://zfin.org/ZDB-GENE-030131-8581	http://zfin.org/ZDB-GENE-030131-8581	1.45793e-10	-0.74487	0.816	0.867	2
ENSDARG00000086288	scg3	secretogranin III [Source:ZFIN;Acc:ZDB-GENE-040426-1725]	http://zfin.org/ZDB-GENE-040426-1725	http://zfin.org/ZDB-GENE-040426-1725	9.71629e-13	-0.742119	0.333	0.55	2
ENSDARG00000077291	rps2	ribosomal protein S2 [Source:ZFIN;Acc:ZDB-GENE-040426-2454]	http://zfin.org/ZDB-GENE-040426-2454	http://zfin.org/ZDB-GENE-040426-2454	1.61804e-17	-0.740663	0.991	0.983	2
ENSDARG00000104674	CABZ01075268.2		http://zfin.org/	http://zfin.org/	2.30358e-13	-0.740254	0.667	0.817	2
ENSDARG00000054050	vsig8a	V-set and immunoglobulin domain containing 8a [Source:ZFIN;Acc:ZDB-GENE-050417-338]	http://zfin.org/ZDB-GENE-050417-338	http://zfin.org/ZDB-GENE-050417-338	6.41206e-12	-0.738824	0.719	0.817	2
ENSDARG00000070019	taf15	TAF15 RNA polymerase II, TATA box binding protein (TBP)-associated factor [Source:ZFIN;Acc:ZDB-GENE-061215-102]	http://zfin.org/ZDB-GENE-061215-102	http://zfin.org/ZDB-GENE-061215-102	1.60853e-10	-0.737968	0.272	0.533	2
ENSDARG00000063535	chd4a	chromodomain helicase DNA binding protein 4a [Source:ZFIN;Acc:ZDB-GENE-041111-187]	http://zfin.org/ZDB-GENE-041111-187	http://zfin.org/ZDB-GENE-041111-187	3.15069e-07	-0.73635	0.263	0.583	2
ENSDARG00000053810	hnrnpc	heterogeneous nuclear ribonucleoprotein C [Source:ZFIN;Acc:ZDB-GENE-040426-2043]	http://zfin.org/ZDB-GENE-040426-2043	http://zfin.org/ZDB-GENE-040426-2043	8.00089e-10	-0.734472	0.289	0.517	2
ENSDARG00000005791	rpl28	ribosomal protein L28 [Source:ZFIN;Acc:ZDB-GENE-040930-10]	http://zfin.org/ZDB-GENE-040930-10	http://zfin.org/ZDB-GENE-040930-10	1.56771e-16	-0.733882	0.974	0.967	2
ENSDARG00000005513	naca	nascent polypeptide-associated complex alpha subunit [Source:ZFIN;Acc:ZDB-GENE-020423-4]	http://zfin.org/ZDB-GENE-020423-4	http://zfin.org/ZDB-GENE-020423-4	7.49074e-19	-0.73338	0.974	0.967	2
ENSDARG00000002215	rtca	RNA 3'-terminal phosphate cyclase [Source:ZFIN;Acc:ZDB-GENE-030131-9687]	http://zfin.org/ZDB-GENE-030131-9687	http://zfin.org/ZDB-GENE-030131-9687	9.6414e-09	-0.732871	0.105	0.433	2
ENSDARG00000056725	hmgb3a	high mobility group box 3a [Source:ZFIN;Acc:ZDB-GENE-050428-1]	http://zfin.org/ZDB-GENE-050428-1	http://zfin.org/ZDB-GENE-050428-1	4.41398e-09	-0.732676	0.789	0.8	2
ENSDARG00000036675	hnrnpa1b	heterogeneous nuclear ribonucleoprotein A1b [Source:ZFIN;Acc:ZDB-GENE-030912-14]	http://zfin.org/ZDB-GENE-030912-14	http://zfin.org/ZDB-GENE-030912-14	4.18231e-06	-0.732207	0.307	0.533	2
ENSDARG00000070674	psmd6	proteasome 26S subunit, non-ATPase 6 [Source:ZFIN;Acc:ZDB-GENE-040426-1038]	http://zfin.org/ZDB-GENE-040426-1038	http://zfin.org/ZDB-GENE-040426-1038	1.05085e-12	-0.731545	0.377	0.65	2
ENSDARG00000036995	lsm6	LSM6 homolog, U6 small nuclear RNA and mRNA degradation associated [Source:ZFIN;Acc:ZDB-GENE-040625-50]	http://zfin.org/ZDB-GENE-040625-50	http://zfin.org/ZDB-GENE-040625-50	2.14887e-10	-0.731393	0.535	0.75	2
ENSDARG00000015315	psmc5	proteasome 26S subunit, ATPase 5 [Source:ZFIN;Acc:ZDB-GENE-030131-6547]	http://zfin.org/ZDB-GENE-030131-6547	http://zfin.org/ZDB-GENE-030131-6547	4.922e-11	-0.729496	0.57	0.767	2
ENSDARG00000103791	nme2b.1	NME/NM23 nucleoside diphosphate kinase 2b, tandem duplicate 1 [Source:ZFIN;Acc:ZDB-GENE-000210-32]	http://zfin.org/ZDB-GENE-000210-32	http://zfin.org/ZDB-GENE-000210-32	2.39162e-14	-0.725991	0.974	0.95	2
ENSDARG00000006260	tuba8l4	tubulin, alpha 8 like 4 [Source:ZFIN;Acc:ZDB-GENE-040426-860]	http://zfin.org/ZDB-GENE-040426-860	http://zfin.org/ZDB-GENE-040426-860	5.69109e-11	-0.722631	0.895	0.967	2
ENSDARG00000031427	calm2a	calmodulin 2a (phosphorylase kinase, delta) [Source:ZFIN;Acc:ZDB-GENE-030804-3]	http://zfin.org/ZDB-GENE-030804-3	http://zfin.org/ZDB-GENE-030804-3	8.56099e-09	-0.722155	0.895	0.933	2
ENSDARG00000006225	ddx39aa	DEAD (Asp-Glu-Ala-Asp) box polypeptide 39Aa [Source:ZFIN;Acc:ZDB-GENE-030131-4275]	http://zfin.org/ZDB-GENE-030131-4275	http://zfin.org/ZDB-GENE-030131-4275	4.40329e-11	-0.722022	0.474	0.683	2
ENSDARG00000006747	tmem178b	transmembrane protein 178B [Source:ZFIN;Acc:ZDB-GENE-040718-92]	http://zfin.org/ZDB-GENE-040718-92	http://zfin.org/ZDB-GENE-040718-92	2.84341e-09	-0.72176	0.64	0.817	2
ENSDARG00000075211	chd7	chromodomain helicase DNA binding protein 7 [Source:ZFIN;Acc:ZDB-GENE-070912-179]	http://zfin.org/ZDB-GENE-070912-179	http://zfin.org/ZDB-GENE-070912-179	1.79871e-07	-0.721575	0.272	0.5	2
ENSDARG00000101844	mibp2	muscle-specific beta 1 integrin binding protein 2 [Source:ZFIN;Acc:ZDB-GENE-031113-14]	http://zfin.org/ZDB-GENE-031113-14	http://zfin.org/ZDB-GENE-031113-14	2.88055e-17	-0.710257	0.816	0.867	2
ENSDARG00000070437	rpl22	ribosomal protein L22 [Source:ZFIN;Acc:ZDB-GENE-051113-276]	http://zfin.org/ZDB-GENE-051113-276	http://zfin.org/ZDB-GENE-051113-276	2.48976e-13	-0.708849	0.886	0.9	2
ENSDARG00000017891	tcp1	t-complex 1 [Source:ZFIN;Acc:ZDB-GENE-990714-24]	http://zfin.org/ZDB-GENE-990714-24	http://zfin.org/ZDB-GENE-990714-24	1.05321e-13	-0.704992	0.711	0.817	2
ENSDARG00000045248	h3f3d	H3 histone, family 3D [Source:ZFIN;Acc:ZDB-GENE-040426-1023]	http://zfin.org/ZDB-GENE-040426-1023	http://zfin.org/ZDB-GENE-040426-1023	4.43045e-16	-0.703927	0.982	1	2
ENSDARG00000070545	top1l	topoisomerase (DNA) I, like [Source:ZFIN;Acc:ZDB-GENE-060616-217]	http://zfin.org/ZDB-GENE-060616-217	http://zfin.org/ZDB-GENE-060616-217	1.80867e-07	-0.69698	0.219	0.367	2
ENSDARG00000041530	ppih	peptidylprolyl isomerase H (cyclophilin H) [Source:ZFIN;Acc:ZDB-GENE-040625-127]	http://zfin.org/ZDB-GENE-040625-127	http://zfin.org/ZDB-GENE-040625-127	2.30765e-07	-0.696034	0.158	0.483	2
ENSDARG00000010965	psma8	proteasome subunit alpha 8 [Source:ZFIN;Acc:ZDB-GENE-040426-2194]	http://zfin.org/ZDB-GENE-040426-2194	http://zfin.org/ZDB-GENE-040426-2194	5.87594e-12	-0.695755	0.702	0.833	2
ENSDARG00000038635	magoh	mago homolog, exon junction complex core component [Source:ZFIN;Acc:ZDB-GENE-041216-1]	http://zfin.org/ZDB-GENE-041216-1	http://zfin.org/ZDB-GENE-041216-1	1.84303e-13	-0.693305	0.553	0.733	2
ENSDARG00000088178	tp53inp2	tumor protein p53 inducible nuclear protein 2 [Source:ZFIN;Acc:ZDB-GENE-120420-1]	http://zfin.org/ZDB-GENE-120420-1	http://zfin.org/ZDB-GENE-120420-1	3.19411e-06	-0.691108	0.053	0.3	2
ENSDARG00000020261	rab2a	RAB2A, member RAS oncogene family [Source:ZFIN;Acc:ZDB-GENE-011212-2]	http://zfin.org/ZDB-GENE-011212-2	http://zfin.org/ZDB-GENE-011212-2	7.69168e-13	-0.690881	0.649	0.75	2
ENSDARG00000100371	eef2b	eukaryotic translation elongation factor 2b [Source:ZFIN;Acc:ZDB-GENE-030131-5128]	http://zfin.org/ZDB-GENE-030131-5128	http://zfin.org/ZDB-GENE-030131-5128	4.55988e-16	-0.689076	0.912	0.883	2
ENSDARG00000077126	snrnp70	small nuclear ribonucleoprotein 70 (U1) [Source:ZFIN;Acc:ZDB-GENE-040825-2]	http://zfin.org/ZDB-GENE-040825-2	http://zfin.org/ZDB-GENE-040825-2	1.52464e-06	-0.688589	0.167	0.45	2
ENSDARG00000010878	cdkn1ca	cyclin-dependent kinase inhibitor 1Ca [Source:ZFIN;Acc:ZDB-GENE-040123-1]	http://zfin.org/ZDB-GENE-040123-1	http://zfin.org/ZDB-GENE-040123-1	2.54596e-06	-0.686119	0.281	0.617	2
ENSDARG00000021107	sf3a2	splicing factor 3a, subunit 2 [Source:ZFIN;Acc:ZDB-GENE-040426-897]	http://zfin.org/ZDB-GENE-040426-897	http://zfin.org/ZDB-GENE-040426-897	7.04448e-13	-0.683541	0.474	0.65	2
ENSDARG00000045928	psma4	proteasome subunit alpha 4 [Source:ZFIN;Acc:ZDB-GENE-040426-1932]	http://zfin.org/ZDB-GENE-040426-1932	http://zfin.org/ZDB-GENE-040426-1932	4.46292e-11	-0.682114	0.728	0.8	2
ENSDARG00000020101	psmc2	proteasome 26S subunit, ATPase 2 [Source:ZFIN;Acc:ZDB-GENE-040426-1327]	http://zfin.org/ZDB-GENE-040426-1327	http://zfin.org/ZDB-GENE-040426-1327	3.46649e-11	-0.681367	0.36	0.583	2
ENSDARG00000016516	rbm8a	RNA binding motif protein 8A [Source:ZFIN;Acc:ZDB-GENE-050306-51]	http://zfin.org/ZDB-GENE-050306-51	http://zfin.org/ZDB-GENE-050306-51	3.03121e-13	-0.678665	0.807	0.817	2
ENSDARG00000020482	nono	non-POU domain containing, octamer-binding [Source:ZFIN;Acc:ZDB-GENE-030131-713]	http://zfin.org/ZDB-GENE-030131-713	http://zfin.org/ZDB-GENE-030131-713	1.51503e-13	-0.677958	0.333	0.533	2
ENSDARG00000024746	hsp90aa1.2	heat shock protein 90, alpha (cytosolic), class A member 1, tandem duplicate 2 [Source:ZFIN;Acc:ZDB-GENE-031001-3]	http://zfin.org/ZDB-GENE-031001-3	http://zfin.org/ZDB-GENE-031001-3	2.20619e-07	-0.676482	0.746	0.767	2
ENSDARG00000030537	psmc1a	proteasome 26S subunit, ATPase 1a [Source:ZFIN;Acc:ZDB-GENE-030131-8730]	http://zfin.org/ZDB-GENE-030131-8730	http://zfin.org/ZDB-GENE-030131-8730	3.92057e-11	-0.674902	0.316	0.567	2
ENSDARG00000074242	serbp1a	SERPINE1 mRNA binding protein 1a [Source:ZFIN;Acc:ZDB-GENE-030131-7389]	http://zfin.org/ZDB-GENE-030131-7389	http://zfin.org/ZDB-GENE-030131-7389	1.04566e-08	-0.67101	0.772	0.9	2
ENSDARG00000013843	sept5a	septin 5a [Source:ZFIN;Acc:ZDB-GENE-030131-7868]	http://zfin.org/ZDB-GENE-030131-7868	http://zfin.org/ZDB-GENE-030131-7868	5.81827e-10	-0.670145	0.044	0.4	2
ENSDARG00000013800	snrpd3	small nuclear ribonucleoprotein D3 polypeptide [Source:ZFIN;Acc:ZDB-GENE-040625-55]	http://zfin.org/ZDB-GENE-040625-55	http://zfin.org/ZDB-GENE-040625-55	7.2397e-09	-0.670087	0.211	0.5	2
ENSDARG00000007385	cct7	chaperonin containing TCP1, subunit 7 (eta) [Source:ZFIN;Acc:ZDB-GENE-020419-7]	http://zfin.org/ZDB-GENE-020419-7	http://zfin.org/ZDB-GENE-020419-7	2.43374e-09	-0.669673	0.667	0.767	2
ENSDARG00000078473	nucks1a	nuclear casein kinase and cyclin-dependent kinase substrate 1a [Source:ZFIN;Acc:ZDB-GENE-040912-175]	http://zfin.org/ZDB-GENE-040912-175	http://zfin.org/ZDB-GENE-040912-175	1.17414e-07	-0.668443	0.5	0.75	2
ENSDARG00000040031	tardbp	TAR DNA binding protein [Source:ZFIN;Acc:ZDB-GENE-030131-3777]	http://zfin.org/ZDB-GENE-030131-3777	http://zfin.org/ZDB-GENE-030131-3777	4.61511e-07	-0.667274	0.404	0.6	2
ENSDARG00000045843	apex1	APEX nuclease (multifunctional DNA repair enzyme) 1 [Source:ZFIN;Acc:ZDB-GENE-040426-2761]	http://zfin.org/ZDB-GENE-040426-2761	http://zfin.org/ZDB-GENE-040426-2761	1.03067e-08	-0.666766	0.035	0.333	2
ENSDARG00000018146	gpx1a	glutathione peroxidase 1a [Source:ZFIN;Acc:ZDB-GENE-030410-1]	http://zfin.org/ZDB-GENE-030410-1	http://zfin.org/ZDB-GENE-030410-1	1.59292e-08	-0.665385	0.632	0.617	2
ENSDARG00000091215	rpz2	rapunzel 2 [Source:ZFIN;Acc:ZDB-GENE-030131-9071]	http://zfin.org/ZDB-GENE-030131-9071	http://zfin.org/ZDB-GENE-030131-9071	2.86084e-08	-0.665047	0.289	0.517	2
ENSDARG00000008097	srsf9	serine/arginine-rich splicing factor 9 [Source:ZFIN;Acc:ZDB-GENE-040426-2397]	http://zfin.org/ZDB-GENE-040426-2397	http://zfin.org/ZDB-GENE-040426-2397	5.40647e-09	-0.66111	0.298	0.633	2
ENSDARG00000057484	srsf2a	serine/arginine-rich splicing factor 2a [Source:ZFIN;Acc:ZDB-GENE-040426-2706]	http://zfin.org/ZDB-GENE-040426-2706	http://zfin.org/ZDB-GENE-040426-2706	7.7783e-11	-0.658786	0.482	0.633	2
ENSDARG00000104837	nudc	nudC nuclear distribution protein [Source:ZFIN;Acc:ZDB-GENE-040426-899]	http://zfin.org/ZDB-GENE-040426-899	http://zfin.org/ZDB-GENE-040426-899	1.26394e-07	-0.652283	0.456	0.683	2
ENSDARG00000009871	snrpc	small nuclear ribonucleoprotein polypeptide C [Source:ZFIN;Acc:ZDB-GENE-020419-26]	http://zfin.org/ZDB-GENE-020419-26	http://zfin.org/ZDB-GENE-020419-26	1.89534e-09	-0.650967	0.184	0.5	2
ENSDARG00000055475	rps27.2	ribosomal protein S27, isoform 2 [Source:ZFIN;Acc:ZDB-GENE-040426-1735]	http://zfin.org/ZDB-GENE-040426-1735	http://zfin.org/ZDB-GENE-040426-1735	1.05197e-10	-0.650795	0.833	0.883	2
ENSDARG00000011510	rcc2	regulator of chromosome condensation 2 [Source:ZFIN;Acc:ZDB-GENE-040426-2213]	http://zfin.org/ZDB-GENE-040426-2213	http://zfin.org/ZDB-GENE-040426-2213	4.45696e-08	-0.649524	0.096	0.283	2
ENSDARG00000017084	bud31	BUD31 homolog (S. cerevisiae) [Source:ZFIN;Acc:ZDB-GENE-040720-3]	http://zfin.org/ZDB-GENE-040720-3	http://zfin.org/ZDB-GENE-040720-3	4.32654e-11	-0.64856	0.693	0.8	2
ENSDARG00000101624	lmnb2	lamin B2 [Source:ZFIN;Acc:ZDB-GENE-990630-13]	http://zfin.org/ZDB-GENE-990630-13	http://zfin.org/ZDB-GENE-990630-13	0.000326983	-0.645033	0.061	0.233	2
ENSDARG00000038030	rbx1	ring-box 1, E3 ubiquitin protein ligase [Source:ZFIN;Acc:ZDB-GENE-041008-106]	http://zfin.org/ZDB-GENE-041008-106	http://zfin.org/ZDB-GENE-041008-106	4.74701e-10	-0.643829	0.825	0.9	2
ENSDARG00000037038	psmc6	proteasome 26S subunit, ATPase 6 [Source:ZFIN;Acc:ZDB-GENE-030131-304]	http://zfin.org/ZDB-GENE-030131-304	http://zfin.org/ZDB-GENE-030131-304	4.52537e-11	-0.642677	0.605	0.717	2
ENSDARG00000058538	alcamb	activated leukocyte cell adhesion molecule b [Source:ZFIN;Acc:ZDB-GENE-030131-1768]	http://zfin.org/ZDB-GENE-030131-1768	http://zfin.org/ZDB-GENE-030131-1768	7.94046e-07	-0.642152	0.105	0.3	2
ENSDARG00000061228	pfdn4	prefoldin subunit 4 [Source:ZFIN;Acc:ZDB-GENE-100922-122]	http://zfin.org/ZDB-GENE-100922-122	http://zfin.org/ZDB-GENE-100922-122	1.63023e-08	-0.641674	0.307	0.533	2
ENSDARG00000020454	psmd8	proteasome 26S subunit, non-ATPase 8 [Source:ZFIN;Acc:ZDB-GENE-040625-136]	http://zfin.org/ZDB-GENE-040625-136	http://zfin.org/ZDB-GENE-040625-136	1.89702e-11	-0.641267	0.377	0.5	2
ENSDARG00000063100	psmd14	proteasome 26S subunit, non-ATPase 14 [Source:ZFIN;Acc:ZDB-GENE-070410-56]	http://zfin.org/ZDB-GENE-070410-56	http://zfin.org/ZDB-GENE-070410-56	1.09834e-08	-0.641159	0.386	0.583	2
ENSDARG00000014817	ranbp1	RAN binding protein 1 [Source:ZFIN;Acc:ZDB-GENE-040426-2548]	http://zfin.org/ZDB-GENE-040426-2548	http://zfin.org/ZDB-GENE-040426-2548	1.19894e-09	-0.640041	0.272	0.45	2
ENSDARG00000071670	tma7	translation machinery associated 7 homolog [Source:ZFIN;Acc:ZDB-GENE-061027-176]	http://zfin.org/ZDB-GENE-061027-176	http://zfin.org/ZDB-GENE-061027-176	1.75481e-08	-0.638792	0.842	0.9	2
ENSDARG00000022564	zgc:56106	zgc:56106 [Source:ZFIN;Acc:ZDB-GENE-040426-904]	http://zfin.org/ZDB-GENE-040426-904	http://zfin.org/ZDB-GENE-040426-904	3.32942e-09	-0.636373	0.289	0.55	2
ENSDARG00000075570	ide	insulin-degrading enzyme [Source:ZFIN;Acc:ZDB-GENE-070410-85]	http://zfin.org/ZDB-GENE-070410-85	http://zfin.org/ZDB-GENE-070410-85	8.80112e-06	-0.635923	0.123	0.417	2
ENSDARG00000013307	rpl19	ribosomal protein L19 [Source:ZFIN;Acc:ZDB-GENE-040426-2290]	http://zfin.org/ZDB-GENE-040426-2290	http://zfin.org/ZDB-GENE-040426-2290	2.03452e-19	-0.635817	0.982	0.983	2
ENSDARG00000102741	sumo2b	small ubiquitin-like modifier 2b [Source:ZFIN;Acc:ZDB-GENE-040801-7]	http://zfin.org/ZDB-GENE-040801-7	http://zfin.org/ZDB-GENE-040801-7	2.4489e-09	-0.634646	0.737	0.85	2
ENSDARG00000039452	hk1	hexokinase 1 [Source:ZFIN;Acc:ZDB-GENE-040426-2848]	http://zfin.org/ZDB-GENE-040426-2848	http://zfin.org/ZDB-GENE-040426-2848	1.95037e-05	-0.633175	0.158	0.4	2
ENSDARG00000045399	cct5	chaperonin containing TCP1, subunit 5 (epsilon) [Source:ZFIN;Acc:ZDB-GENE-030131-977]	http://zfin.org/ZDB-GENE-030131-977	http://zfin.org/ZDB-GENE-030131-977	1.12007e-10	-0.631415	0.719	0.817	2
ENSDARG00000016173	cct3	chaperonin containing TCP1, subunit 3 (gamma) [Source:ZFIN;Acc:ZDB-GENE-020419-5]	http://zfin.org/ZDB-GENE-020419-5	http://zfin.org/ZDB-GENE-020419-5	2.69703e-11	-0.631038	0.412	0.567	2
ENSDARG00000070922	cnbpb	CCHC-type zinc finger, nucleic acid binding protein b [Source:ZFIN;Acc:ZDB-GENE-030131-7782]	http://zfin.org/ZDB-GENE-030131-7782	http://zfin.org/ZDB-GENE-030131-7782	4.55601e-10	-0.630313	0.816	0.867	2
ENSDARG00000035324	hnrpl	heterogeneous nuclear ribonucleoprotein L [Source:ZFIN;Acc:ZDB-GENE-040426-710]	http://zfin.org/ZDB-GENE-040426-710	http://zfin.org/ZDB-GENE-040426-710	1.90706e-09	-0.62981	0.158	0.467	2
ENSDARG00000013475	cct4	chaperonin containing TCP1, subunit 4 (delta) [Source:ZFIN;Acc:ZDB-GENE-040426-1421]	http://zfin.org/ZDB-GENE-040426-1421	http://zfin.org/ZDB-GENE-040426-1421	8.47494e-12	-0.62953	0.667	0.75	2
ENSDARG00000036190	txnl4a	thioredoxin-like 4A [Source:ZFIN;Acc:ZDB-GENE-041010-25]	http://zfin.org/ZDB-GENE-041010-25	http://zfin.org/ZDB-GENE-041010-25	2.52735e-07	-0.62938	0.404	0.667	2
ENSDARG00000056167	hspe1	heat shock 10 protein 1 [Source:ZFIN;Acc:ZDB-GENE-000906-2]	http://zfin.org/ZDB-GENE-000906-2	http://zfin.org/ZDB-GENE-000906-2	2.4534e-05	-0.627789	0.325	0.567	2
ENSDARG00000036541	rhbdf1a	rhomboid 5 homolog 1a (Drosophila) [Source:ZFIN;Acc:ZDB-GENE-040704-75]	http://zfin.org/ZDB-GENE-040704-75	http://zfin.org/ZDB-GENE-040704-75	1.43691e-08	-0.62769	0.096	0.383	2
ENSDARG00000044431	ppig	peptidylprolyl isomerase G (cyclophilin G) [Source:ZFIN;Acc:ZDB-GENE-040426-2822]	http://zfin.org/ZDB-GENE-040426-2822	http://zfin.org/ZDB-GENE-040426-2822	1.25586e-06	-0.626324	0.14	0.367	2
ENSDARG00000032866	erh	enhancer of rudimentary homolog (Drosophila) [Source:ZFIN;Acc:ZDB-GENE-990415-57]	http://zfin.org/ZDB-GENE-990415-57	http://zfin.org/ZDB-GENE-990415-57	1.41704e-09	-0.623745	0.667	0.8	2
ENSDARG00000061735	hnrnpm	heterogeneous nuclear ribonucleoprotein M [Source:ZFIN;Acc:ZDB-GENE-030131-6898]	http://zfin.org/ZDB-GENE-030131-6898	http://zfin.org/ZDB-GENE-030131-6898	7.13245e-07	-0.622817	0.105	0.333	2
ENSDARG00000012025	hs6st2	heparan sulfate 6-O-sulfotransferase 2 [Source:ZFIN;Acc:ZDB-GENE-030909-14]	http://zfin.org/ZDB-GENE-030909-14	http://zfin.org/ZDB-GENE-030909-14	2.62585e-11	-0.621169	0.175	0.35	2
ENSDARG00000104353	nop58	NOP58 ribonucleoprotein homolog (yeast) [Source:ZFIN;Acc:ZDB-GENE-040426-2140]	http://zfin.org/ZDB-GENE-040426-2140	http://zfin.org/ZDB-GENE-040426-2140	7.82953e-07	-0.620965	0.158	0.417	2
ENSDARG00000027899	shfm1	split hand/foot malformation (ectrodactyly) type 1 [Source:ZFIN;Acc:ZDB-GENE-030131-988]	http://zfin.org/ZDB-GENE-030131-988	http://zfin.org/ZDB-GENE-030131-988	3.55165e-12	-0.620337	0.833	0.817	2
ENSDARG00000029058	rbbp4	retinoblastoma binding protein 4 [Source:ZFIN;Acc:ZDB-GENE-030131-445]	http://zfin.org/ZDB-GENE-030131-445	http://zfin.org/ZDB-GENE-030131-445	3.50956e-08	-0.618965	0.211	0.483	2
ENSDARG00000019810	nfe2l3	nuclear factor, erythroid 2-like 3 [Source:ZFIN;Acc:ZDB-GENE-040426-2334]	http://zfin.org/ZDB-GENE-040426-2334	http://zfin.org/ZDB-GENE-040426-2334	1.05777e-06	-0.615751	0.035	0.283	2
ENSDARG00000099635	akap8l	A kinase (PRKA) anchor protein 8-like [Source:ZFIN;Acc:ZDB-GENE-040426-2303]	http://zfin.org/ZDB-GENE-040426-2303	http://zfin.org/ZDB-GENE-040426-2303	4.05153e-08	-0.613964	0.412	0.583	2
ENSDARG00000089626	ptges3b	prostaglandin E synthase 3b (cytosolic) [Source:ZFIN;Acc:ZDB-GENE-040625-144]	http://zfin.org/ZDB-GENE-040625-144	http://zfin.org/ZDB-GENE-040625-144	1.38556e-08	-0.613292	0.439	0.633	2
ENSDARG00000026489	khsrp	KH-type splicing regulatory protein [Source:ZFIN;Acc:ZDB-GENE-030131-4357]	http://zfin.org/ZDB-GENE-030131-4357	http://zfin.org/ZDB-GENE-030131-4357	2.32182e-09	-0.611544	0.175	0.417	2
ENSDARG00000023028	cdv3	carnitine deficiency-associated gene expressed in ventricle 3 [Source:ZFIN;Acc:ZDB-GENE-030131-6034]	http://zfin.org/ZDB-GENE-030131-6034	http://zfin.org/ZDB-GENE-030131-6034	5.02235e-08	-0.611468	0.377	0.483	2
ENSDARG00000002336	dlc	deltaC [Source:ZFIN;Acc:ZDB-GENE-000125-4]	http://zfin.org/ZDB-GENE-000125-4	http://zfin.org/ZDB-GENE-000125-4	0.000116278	-0.609475	0.009	0.2	2
ENSDARG00000093484	si:dkey-95p16.2	si:dkey-95p16.2 [Source:ZFIN;Acc:ZDB-GENE-081105-65]	http://zfin.org/ZDB-GENE-081105-65	http://zfin.org/ZDB-GENE-081105-65	4.95132e-07	-0.60834	0.553	0.7	2
ENSDARG00000006092	rad21a	RAD21 cohesin complex component a [Source:ZFIN;Acc:ZDB-GENE-030131-994]	http://zfin.org/ZDB-GENE-030131-994	http://zfin.org/ZDB-GENE-030131-994	4.4049e-09	-0.605704	0.526	0.667	2
ENSDARG00000031511	psmb2	proteasome subunit beta 2 [Source:ZFIN;Acc:ZDB-GENE-040718-353]	http://zfin.org/ZDB-GENE-040718-353	http://zfin.org/ZDB-GENE-040718-353	1.18337e-10	-0.605293	0.421	0.55	2
ENSDARG00000098574	srsf11	serine/arginine-rich splicing factor 11 [Source:ZFIN;Acc:ZDB-GENE-030131-605]	http://zfin.org/ZDB-GENE-030131-605	http://zfin.org/ZDB-GENE-030131-605	4.29731e-06	-0.603601	0.386	0.583	2
ENSDARG00000041959	cxcr4b	chemokine (C-X-C motif), receptor 4b [Source:ZFIN;Acc:ZDB-GENE-010614-1]	http://zfin.org/ZDB-GENE-010614-1	http://zfin.org/ZDB-GENE-010614-1	2.38264e-08	-0.601407	0.07	0.283	2
ENSDARG00000104583	CABZ01111915.1		http://zfin.org/	http://zfin.org/	8.14057e-11	-0.601192	0.421	0.55	2
ENSDARG00000027099	psmc4	proteasome 26S subunit, ATPase 4 [Source:ZFIN;Acc:ZDB-GENE-030131-5083]	http://zfin.org/ZDB-GENE-030131-5083	http://zfin.org/ZDB-GENE-030131-5083	2.86694e-13	-0.60082	0.605	0.7	2
ENSDARG00000089663	lsm3	LSM3 homolog, U6 small nuclear RNA and mRNA degradation associated [Source:ZFIN;Acc:ZDB-GENE-161207-2]	http://zfin.org/ZDB-GENE-161207-2	http://zfin.org/ZDB-GENE-161207-2	4.53397e-11	-0.600201	0.447	0.617	2
ENSDARG00000045914	si:ch211-51e12.7	si:ch211-51e12.7 [Source:ZFIN;Acc:ZDB-GENE-030131-8279]	http://zfin.org/ZDB-GENE-030131-8279	http://zfin.org/ZDB-GENE-030131-8279	7.053e-10	-0.598126	0.544	0.683	2
ENSDARG00000089787	crebzf	CREB/ATF bZIP transcription factor [Source:ZFIN;Acc:ZDB-GENE-030131-8015]	http://zfin.org/ZDB-GENE-030131-8015	http://zfin.org/ZDB-GENE-030131-8015	5.90894e-07	-0.596695	0.474	0.667	2
ENSDARG00000003757	cnpy1	canopy1 [Source:ZFIN;Acc:ZDB-GENE-060315-3]	http://zfin.org/ZDB-GENE-060315-3	http://zfin.org/ZDB-GENE-060315-3	6.25479e-06	-0.596622	0.219	0.383	2
ENSDARG00000058560	adrm1	adhesion regulating molecule 1 [Source:ZFIN;Acc:ZDB-GENE-040426-905]	http://zfin.org/ZDB-GENE-040426-905	http://zfin.org/ZDB-GENE-040426-905	1.70657e-06	-0.59259	0.175	0.367	2
ENSDARG00000061797	zgc:154006	zgc:154006 [Source:ZFIN;Acc:ZDB-GENE-061013-134]	http://zfin.org/ZDB-GENE-061013-134	http://zfin.org/ZDB-GENE-061013-134	1.3126e-08	-0.59226	0.439	0.533	2
ENSDARG00000054290	acin1a	apoptotic chromatin condensation inducer 1a [Source:ZFIN;Acc:ZDB-GENE-030616-583]	http://zfin.org/ZDB-GENE-030616-583	http://zfin.org/ZDB-GENE-030616-583	3.9116e-08	-0.590051	0.491	0.6	2
ENSDARG00000104227	nop10	NOP10 ribonucleoprotein homolog (yeast) [Source:ZFIN;Acc:ZDB-GENE-041007-4]	http://zfin.org/ZDB-GENE-041007-4	http://zfin.org/ZDB-GENE-041007-4	6.47615e-06	-0.589455	0.263	0.483	2
ENSDARG00000035398	enc1	ectodermal-neural cortex 1 [Source:ZFIN;Acc:ZDB-GENE-060531-140]	http://zfin.org/ZDB-GENE-060531-140	http://zfin.org/ZDB-GENE-060531-140	0.000676184	-0.58499	0.053	0.217	2
ENSDARG00000026865	fam107b	family with sequence similarity 107, member B [Source:ZFIN;Acc:ZDB-GENE-031030-12]	http://zfin.org/ZDB-GENE-031030-12	http://zfin.org/ZDB-GENE-031030-12	8.07567e-06	-0.584158	0.211	0.433	2
ENSDARG00000101216	meaf6	MYST/Esa1-associated factor 6 [Source:ZFIN;Acc:ZDB-GENE-040808-12]	http://zfin.org/ZDB-GENE-040808-12	http://zfin.org/ZDB-GENE-040808-12	8.28299e-10	-0.583016	0.316	0.55	2
ENSDARG00000026180	prpf8	pre-mRNA processing factor 8 [Source:ZFIN;Acc:ZDB-GENE-030131-577]	http://zfin.org/ZDB-GENE-030131-577	http://zfin.org/ZDB-GENE-030131-577	0.000139553	-0.582816	0.061	0.25	2
ENSDARG00000058328	lsm7	LSM7 homolog, U6 small nuclear RNA and mRNA degradation associated [Source:ZFIN;Acc:ZDB-GENE-030131-8284]	http://zfin.org/ZDB-GENE-030131-8284	http://zfin.org/ZDB-GENE-030131-8284	4.14376e-11	-0.582162	0.807	0.833	2
ENSDARG00000058358	krt8	keratin 8 [Source:ZFIN;Acc:ZDB-GENE-030411-5]	http://zfin.org/ZDB-GENE-030411-5	http://zfin.org/ZDB-GENE-030411-5	3.62565e-08	-0.581181	0.781	0.733	2
ENSDARG00000069865	grxcr1	glutaredoxin, cysteine rich 1 [Source:ZFIN;Acc:ZDB-GENE-070424-166]	http://zfin.org/ZDB-GENE-070424-166	http://zfin.org/ZDB-GENE-070424-166	6.60339e-09	-0.579723	0.684	0.733	2
ENSDARG00000044402	nop16	NOP16 nucleolar protein homolog (yeast) [Source:ZFIN;Acc:ZDB-GENE-040718-267]	http://zfin.org/ZDB-GENE-040718-267	http://zfin.org/ZDB-GENE-040718-267	2.5667e-09	-0.578874	0.184	0.333	2
ENSDARG00000099366	supt4h1	SPT4 homolog, DSIF elongation factor subunit [Source:ZFIN;Acc:ZDB-GENE-040718-214]	http://zfin.org/ZDB-GENE-040718-214	http://zfin.org/ZDB-GENE-040718-214	1.84982e-08	-0.577412	0.439	0.617	2
ENSDARG00000043976	etf1b	eukaryotic translation termination factor 1b [Source:ZFIN;Acc:ZDB-GENE-021029-1]	http://zfin.org/ZDB-GENE-021029-1	http://zfin.org/ZDB-GENE-021029-1	4.90687e-08	-0.577391	0.316	0.483	2
ENSDARG00000097797	tomm6	translocase of outer mitochondrial membrane 6 homolog (yeast) [Source:ZFIN;Acc:ZDB-GENE-131121-445]	http://zfin.org/ZDB-GENE-131121-445	http://zfin.org/ZDB-GENE-131121-445	3.12251e-09	-0.57666	0.465	0.6	2
ENSDARG00000086215	gpr156	G protein-coupled receptor 156 [Source:ZFIN;Acc:ZDB-GENE-060201-2]	http://zfin.org/ZDB-GENE-060201-2	http://zfin.org/ZDB-GENE-060201-2	1.83252e-09	-0.575854	0.456	0.55	2
ENSDARG00000077045	scg5	secretogranin V [Source:ZFIN;Acc:ZDB-GENE-040426-1687]	http://zfin.org/ZDB-GENE-040426-1687	http://zfin.org/ZDB-GENE-040426-1687	1.45618e-05	-0.575316	0.421	0.517	2
ENSDARG00000058996	jam2a	junctional adhesion molecule 2a [Source:ZFIN;Acc:ZDB-GENE-031204-3]	http://zfin.org/ZDB-GENE-031204-3	http://zfin.org/ZDB-GENE-031204-3	7.27993e-05	-0.573513	0.035	0.267	2
ENSDARG00000099566	lmbrd2a	LMBR1 domain containing 2a [Source:ZFIN;Acc:ZDB-GENE-050417-32]	http://zfin.org/ZDB-GENE-050417-32	http://zfin.org/ZDB-GENE-050417-32	0.000109945	-0.573174	0.061	0.317	2
ENSDARG00000016783	srsf6b	serine/arginine-rich splicing factor 6b [Source:ZFIN;Acc:ZDB-GENE-041219-1]	http://zfin.org/ZDB-GENE-041219-1	http://zfin.org/ZDB-GENE-041219-1	1.33732e-08	-0.573058	0.465	0.617	2
ENSDARG00000079780	HNRNPUL1 (1 of many)	heterogeneous nuclear ribonucleoprotein U like 1 [Source:HGNC Symbol;Acc:HGNC:17011]	http://zfin.org/	http://zfin.org/	6.73914e-05	-0.572358	0.14	0.367	2
ENSDARG00000104478	cap2	CAP, adenylate cyclase-associated protein, 2 (yeast) [Source:ZFIN;Acc:ZDB-GENE-040426-1758]	http://zfin.org/ZDB-GENE-040426-1758	http://zfin.org/ZDB-GENE-040426-1758	0.000322952	-0.572324	0.105	0.333	2
ENSDARG00000069422	nhp2	NHP2 ribonucleoprotein homolog (yeast) [Source:ZFIN;Acc:ZDB-GENE-030131-533]	http://zfin.org/ZDB-GENE-030131-533	http://zfin.org/ZDB-GENE-030131-533	2.288e-08	-0.571452	0.219	0.483	2
ENSDARG00000003486	ppp1caa	protein phosphatase 1, catalytic subunit, alpha isozyme a [Source:ZFIN;Acc:ZDB-GENE-040516-3]	http://zfin.org/ZDB-GENE-040516-3	http://zfin.org/ZDB-GENE-040516-3	8.91059e-06	-0.57084	0.316	0.6	2
ENSDARG00000008592	mtmr8	myotubularin related protein 8 [Source:ZFIN;Acc:ZDB-GENE-040426-1016]	http://zfin.org/ZDB-GENE-040426-1016	http://zfin.org/ZDB-GENE-040426-1016	8.53721e-08	-0.569257	0.123	0.4	2
ENSDARG00000052966	nmt1a	N-myristoyltransferase 1a [Source:ZFIN;Acc:ZDB-GENE-050522-477]	http://zfin.org/ZDB-GENE-050522-477	http://zfin.org/ZDB-GENE-050522-477	1.98905e-10	-0.56838	0.228	0.417	2
ENSDARG00000002587	dpysl3	dihydropyrimidinase-like 3 [Source:ZFIN;Acc:ZDB-GENE-050720-2]	http://zfin.org/ZDB-GENE-050720-2	http://zfin.org/ZDB-GENE-050720-2	6.39983e-07	-0.566533	0.351	0.433	2
ENSDARG00000023299	snu13b	SNU13 homolog, small nuclear ribonucleoprotein b (U4/U6.U5) [Source:ZFIN;Acc:ZDB-GENE-030131-9670]	http://zfin.org/ZDB-GENE-030131-9670	http://zfin.org/ZDB-GENE-030131-9670	3.50268e-07	-0.563664	0.202	0.433	2
ENSDARG00000054978	kifc3	kinesin family member C3 [Source:ZFIN;Acc:ZDB-GENE-030131-3724]	http://zfin.org/ZDB-GENE-030131-3724	http://zfin.org/ZDB-GENE-030131-3724	4.10987e-07	-0.563156	0.421	0.633	2
ENSDARG00000087245	CR847844.2		http://zfin.org/	http://zfin.org/	0.000486882	-0.561965	0.088	0.333	2
ENSDARG00000025972	mcts1	malignant T cell amplified sequence 1 [Source:ZFIN;Acc:ZDB-GENE-040426-957]	http://zfin.org/ZDB-GENE-040426-957	http://zfin.org/ZDB-GENE-040426-957	9.17908e-08	-0.561745	0.237	0.45	2
ENSDARG00000031907	ptbp1b	polypyrimidine tract binding protein 1b [Source:ZFIN;Acc:ZDB-GENE-030131-9796]	http://zfin.org/ZDB-GENE-030131-9796	http://zfin.org/ZDB-GENE-030131-9796	1.09198e-08	-0.558519	0.877	0.883	2
ENSDARG00000093945	vma21	VMA21 vacuolar H+-ATPase homolog (S. cerevisiae) [Source:ZFIN;Acc:ZDB-GENE-081104-272]	http://zfin.org/ZDB-GENE-081104-272	http://zfin.org/ZDB-GENE-081104-272	4.19872e-09	-0.556245	0.614	0.683	2
ENSDARG00000070828	actl6a	actin-like 6A [Source:ZFIN;Acc:ZDB-GENE-020419-36]	http://zfin.org/ZDB-GENE-020419-36	http://zfin.org/ZDB-GENE-020419-36	0.000164429	-0.554037	0.096	0.333	2
ENSDARG00000060501	dpcd	deleted in primary ciliary dyskinesia homolog (mouse) [Source:ZFIN;Acc:ZDB-GENE-060825-166]	http://zfin.org/ZDB-GENE-060825-166	http://zfin.org/ZDB-GENE-060825-166	1.94614e-06	-0.550444	0.289	0.45	2
ENSDARG00000099375	poldip3	polymerase (DNA-directed), delta interacting protein 3 [Source:ZFIN;Acc:ZDB-GENE-120201-2]	http://zfin.org/ZDB-GENE-120201-2	http://zfin.org/ZDB-GENE-120201-2	2.56537e-07	-0.549117	0.263	0.467	2
ENSDARG00000045262	gsnb	gelsolin b [Source:ZFIN;Acc:ZDB-GENE-030131-8567]	http://zfin.org/ZDB-GENE-030131-8567	http://zfin.org/ZDB-GENE-030131-8567	1.27013e-05	-0.548133	0.518	0.683	2
ENSDARG00000035678	zgc:91910	zgc:91910 [Source:ZFIN;Acc:ZDB-GENE-040808-48]	http://zfin.org/ZDB-GENE-040808-48	http://zfin.org/ZDB-GENE-040808-48	2.43534e-07	-0.547028	0.474	0.617	2
ENSDARG00000057026	ran	RAN, member RAS oncogene family [Source:ZFIN;Acc:ZDB-GENE-990415-88]	http://zfin.org/ZDB-GENE-990415-88	http://zfin.org/ZDB-GENE-990415-88	2.55692e-12	-0.545428	0.86	0.767	2
ENSDARG00000099148	bzw1b	basic leucine zipper and W2 domains 1b [Source:ZFIN;Acc:ZDB-GENE-040426-2881]	http://zfin.org/ZDB-GENE-040426-2881	http://zfin.org/ZDB-GENE-040426-2881	1.3086e-06	-0.544403	0.272	0.467	2
ENSDARG00000069977	myg1	melanocyte proliferating gene 1 [Source:ZFIN;Acc:ZDB-GENE-060312-32]	http://zfin.org/ZDB-GENE-060312-32	http://zfin.org/ZDB-GENE-060312-32	1.40384e-05	-0.542818	0.228	0.5	2
ENSDARG00000059725	hypk	huntingtin interacting protein K [Source:ZFIN;Acc:ZDB-GENE-080515-6]	http://zfin.org/ZDB-GENE-080515-6	http://zfin.org/ZDB-GENE-080515-6	1.01181e-15	-0.54024	0.5	0.65	2
ENSDARG00000089976	spcs3	signal peptidase complex subunit 3 [Source:ZFIN;Acc:ZDB-GENE-040426-2206]	http://zfin.org/ZDB-GENE-040426-2206	http://zfin.org/ZDB-GENE-040426-2206	1.56119e-07	-0.540145	0.482	0.7	2
ENSDARG00000068434	h3f3b.1	H3 histone, family 3B.1 [Source:ZFIN;Acc:ZDB-GENE-050417-65]	http://zfin.org/ZDB-GENE-050417-65	http://zfin.org/ZDB-GENE-050417-65	4.95449e-11	-0.539416	0.965	0.933	2
ENSDARG00000017741	g3bp1	GTPase activating protein (SH3 domain) binding protein 1 [Source:ZFIN;Acc:ZDB-GENE-030131-7452]	http://zfin.org/ZDB-GENE-030131-7452	http://zfin.org/ZDB-GENE-030131-7452	3.41184e-05	-0.538504	0.202	0.417	2
ENSDARG00000029445	EIF1B	zgc:56676 [Source:ZFIN;Acc:ZDB-GENE-040426-1109]	http://zfin.org/ZDB-GENE-040426-1109	http://zfin.org/ZDB-GENE-040426-1109	2.39696e-06	-0.535783	0.333	0.483	2
ENSDARG00000069329	drgx	dorsal root ganglia homeobox [Source:ZFIN;Acc:ZDB-GENE-070330-1]	http://zfin.org/ZDB-GENE-070330-1	http://zfin.org/ZDB-GENE-070330-1	0.000432179	-0.535286	0.009	0.183	2
ENSDARG00000018890	snrpa	small nuclear ribonucleoprotein polypeptide A [Source:ZFIN;Acc:ZDB-GENE-030131-2841]	http://zfin.org/ZDB-GENE-030131-2841	http://zfin.org/ZDB-GENE-030131-2841	8.39158e-10	-0.535029	0.219	0.4	2
ENSDARG00000019444	ssr4	signal sequence receptor, delta [Source:ZFIN;Acc:ZDB-GENE-030131-4900]	http://zfin.org/ZDB-GENE-030131-4900	http://zfin.org/ZDB-GENE-030131-4900	1.21021e-06	-0.534815	0.509	0.6	2
ENSDARG00000037593	prickle2b	prickle homolog 2b [Source:ZFIN;Acc:ZDB-GENE-030724-6]	http://zfin.org/ZDB-GENE-030724-6	http://zfin.org/ZDB-GENE-030724-6	6.52996e-06	-0.533419	0.193	0.433	2
ENSDARG00000012397	eya4	EYA transcriptional coactivator and phosphatase 4 [Source:ZFIN;Acc:ZDB-GENE-050327-93]	http://zfin.org/ZDB-GENE-050327-93	http://zfin.org/ZDB-GENE-050327-93	7.61964e-06	-0.531916	0.754	0.85	2
ENSDARG00000035043	pfdn5	prefoldin 5 [Source:ZFIN;Acc:ZDB-GENE-030131-6858]	http://zfin.org/ZDB-GENE-030131-6858	http://zfin.org/ZDB-GENE-030131-6858	1.53586e-08	-0.531246	0.316	0.517	2
ENSDARG00000016858	smad7	SMAD family member 7 [Source:ZFIN;Acc:ZDB-GENE-030128-3]	http://zfin.org/ZDB-GENE-030128-3	http://zfin.org/ZDB-GENE-030128-3	1.17446e-07	-0.530432	0.167	0.417	2
ENSDARG00000100582	si:ch211-195b11.3	si:ch211-195b11.3 [Source:ZFIN;Acc:ZDB-GENE-141222-6]	http://zfin.org/ZDB-GENE-141222-6	http://zfin.org/ZDB-GENE-141222-6	5.0799e-07	-0.529424	0.693	0.8	2
ENSDARG00000054271	cdkn1bb	cyclin-dependent kinase inhibitor 1Bb [Source:ZFIN;Acc:ZDB-GENE-030521-13]	http://zfin.org/ZDB-GENE-030521-13	http://zfin.org/ZDB-GENE-030521-13	6.45681e-06	-0.529351	0.754	0.767	2
ENSDARG00000023323	ywhaqb	tyrosine 3-monooxygenase/tryptophan 5-monooxygenase activation protein, theta polypeptide b [Source:ZFIN;Acc:ZDB-GENE-030131-7135]	http://zfin.org/ZDB-GENE-030131-7135	http://zfin.org/ZDB-GENE-030131-7135	3.66816e-05	-0.528861	0.43	0.7	2
ENSDARG00000032575	ywhaz	tyrosine 3-monooxygenase/tryptophan 5-monooxygenase activation protein, zeta polypeptide [Source:ZFIN;Acc:ZDB-GENE-030131-8554]	http://zfin.org/ZDB-GENE-030131-8554	http://zfin.org/ZDB-GENE-030131-8554	2.4831e-05	-0.528631	0.36	0.567	2
ENSDARG00000008920	mrpl53	mitochondrial ribosomal protein L53 [Source:ZFIN;Acc:ZDB-GENE-040912-93]	http://zfin.org/ZDB-GENE-040912-93	http://zfin.org/ZDB-GENE-040912-93	3.7288e-12	-0.528472	0.272	0.383	2
ENSDARG00000052494	pcdh18b	protocadherin 18b [Source:ZFIN;Acc:ZDB-GENE-080804-1]	http://zfin.org/ZDB-GENE-080804-1	http://zfin.org/ZDB-GENE-080804-1	7.85618e-09	-0.527011	0.035	0.317	2
ENSDARG00000092798	ppib	peptidylprolyl isomerase B (cyclophilin B) [Source:ZFIN;Acc:ZDB-GENE-040426-1955]	http://zfin.org/ZDB-GENE-040426-1955	http://zfin.org/ZDB-GENE-040426-1955	1.42648e-08	-0.527005	0.772	0.783	2
ENSDARG00000028228	zbtb18	zinc finger and BTB domain containing 18 [Source:ZFIN;Acc:ZDB-GENE-050419-73]	http://zfin.org/ZDB-GENE-050419-73	http://zfin.org/ZDB-GENE-050419-73	0.0017976	-0.526913	0.149	0.317	2
ENSDARG00000031795	abcf1	ATP-binding cassette, sub-family F (GCN20), member 1 [Source:ZFIN;Acc:ZDB-GENE-050517-31]	http://zfin.org/ZDB-GENE-050517-31	http://zfin.org/ZDB-GENE-050517-31	6.05738e-05	-0.526346	0.132	0.333	2
ENSDARG00000070657	pa2g4b	proliferation-associated 2G4, b [Source:ZFIN;Acc:ZDB-GENE-030131-2182]	http://zfin.org/ZDB-GENE-030131-2182	http://zfin.org/ZDB-GENE-030131-2182	1.93322e-09	-0.525892	0.132	0.4	2
ENSDARG00000092546	pdap1a	pdgfa associated protein 1a [Source:ZFIN;Acc:ZDB-GENE-030131-1693]	http://zfin.org/ZDB-GENE-030131-1693	http://zfin.org/ZDB-GENE-030131-1693	5.73782e-06	-0.525013	0.193	0.383	2
ENSDARG00000004906	stip1	stress-induced phosphoprotein 1 [Source:ZFIN;Acc:ZDB-GENE-041121-17]	http://zfin.org/ZDB-GENE-041121-17	http://zfin.org/ZDB-GENE-041121-17	3.37679e-05	-0.524953	0.307	0.533	2
ENSDARG00000020008	vcp	valosin containing protein [Source:ZFIN;Acc:ZDB-GENE-030131-5408]	http://zfin.org/ZDB-GENE-030131-5408	http://zfin.org/ZDB-GENE-030131-5408	8.3155e-07	-0.523099	0.772	0.883	2
ENSDARG00000077226	smarca4a	SWI/SNF related, matrix associated, actin dependent regulator of chromatin, subfamily a, member 4a [Source:ZFIN;Acc:ZDB-GENE-030605-1]	http://zfin.org/ZDB-GENE-030605-1	http://zfin.org/ZDB-GENE-030605-1	6.83395e-05	-0.52287	0.395	0.717	2
ENSDARG00000062693	nrxn3b	neurexin 3b [Source:ZFIN;Acc:ZDB-GENE-070206-10]	http://zfin.org/ZDB-GENE-070206-10	http://zfin.org/ZDB-GENE-070206-10	0.000431358	-0.522846	0.482	0.6	2
ENSDARG00000103594	npm3	nucleophosmin/nucleoplasmin, 3 [Source:ZFIN;Acc:ZDB-GENE-050320-50]	http://zfin.org/ZDB-GENE-050320-50	http://zfin.org/ZDB-GENE-050320-50	4.7109e-07	-0.521812	0.07	0.35	2
ENSDARG00000100585	coa3a	cytochrome C oxidase assembly factor 3a [Source:ZFIN;Acc:ZDB-GENE-060810-187]	http://zfin.org/ZDB-GENE-060810-187	http://zfin.org/ZDB-GENE-060810-187	1.63996e-06	-0.521215	0.333	0.533	2
ENSDARG00000075445	psmb5	proteasome subunit beta 5 [Source:ZFIN;Acc:ZDB-GENE-990415-215]	http://zfin.org/ZDB-GENE-990415-215	http://zfin.org/ZDB-GENE-990415-215	5.40636e-06	-0.521132	0.333	0.533	2
ENSDARG00000002271	zfand5b	zinc finger, AN1-type domain 5b [Source:ZFIN;Acc:ZDB-GENE-040426-875]	http://zfin.org/ZDB-GENE-040426-875	http://zfin.org/ZDB-GENE-040426-875	1.78536e-05	-0.521092	0.404	0.517	2
ENSDARG00000010721	2017-09-06	septin 6 [Source:ZFIN;Acc:ZDB-GENE-030131-1414]	http://zfin.org/ZDB-GENE-030131-1414	http://zfin.org/ZDB-GENE-030131-1414	4.8295e-08	-0.520187	0.14	0.267	2
ENSDARG00000006524	supt6h	SPT6 homolog, histone chaperone [Source:ZFIN;Acc:ZDB-GENE-030131-7949]	http://zfin.org/ZDB-GENE-030131-7949	http://zfin.org/ZDB-GENE-030131-7949	0.000385707	-0.519188	0.096	0.25	2
ENSDARG00000076120	foxp4	forkhead box P4 [Source:ZFIN;Acc:ZDB-GENE-101207-1]	http://zfin.org/ZDB-GENE-101207-1	http://zfin.org/ZDB-GENE-101207-1	0.00104211	-0.51875	0.096	0.267	2
ENSDARG00000007438	ube2ib	ubiquitin-conjugating enzyme E2Ib [Source:ZFIN;Acc:ZDB-GENE-990614-17]	http://zfin.org/ZDB-GENE-990614-17	http://zfin.org/ZDB-GENE-990614-17	0.000162614	-0.518641	0.342	0.533	2
ENSDARG00000054355	dcaf7	ddb1 and cul4 associated factor 7 [Source:ZFIN;Acc:ZDB-GENE-030131-9511]	http://zfin.org/ZDB-GENE-030131-9511	http://zfin.org/ZDB-GENE-030131-9511	7.9287e-06	-0.518613	0.272	0.467	2
ENSDARG00000102824	pcdh10b	protocadherin 10b [Source:ZFIN;Acc:ZDB-GENE-030721-4]	http://zfin.org/ZDB-GENE-030721-4	http://zfin.org/ZDB-GENE-030721-4	0.000160921	-0.51745	0	0.15	2
ENSDARG00000023160	snrnp40	small nuclear ribonucleoprotein 40 (U5) [Source:ZFIN;Acc:ZDB-GENE-040426-978]	http://zfin.org/ZDB-GENE-040426-978	http://zfin.org/ZDB-GENE-040426-978	7.27649e-06	-0.517131	0.096	0.3	2
ENSDARG00000035282	emc6	ER membrane protein complex subunit 6 [Source:ZFIN;Acc:ZDB-GENE-030131-9164]	http://zfin.org/ZDB-GENE-030131-9164	http://zfin.org/ZDB-GENE-030131-9164	7.33214e-08	-0.516146	0.368	0.567	2
ENSDARG00000032317	tox	thymocyte selection-associated high mobility group box [Source:ZFIN;Acc:ZDB-GENE-070912-181]	http://zfin.org/ZDB-GENE-070912-181	http://zfin.org/ZDB-GENE-070912-181	3.73675e-06	-0.515743	0.158	0.45	2
ENSDARG00000080337	AC024175.4		http://zfin.org/	http://zfin.org/	6.09075e-06	-0.514856	1	1	2
ENSDARG00000028017	tp53inp1	tumor protein p53 inducible nuclear protein 1 [Source:ZFIN;Acc:ZDB-GENE-031018-3]	http://zfin.org/ZDB-GENE-031018-3	http://zfin.org/ZDB-GENE-031018-3	2.91769e-07	-0.514152	0.491	0.55	2
ENSDARG00000028119	sumo3a	small ubiquitin-like modifier 3a [Source:ZFIN;Acc:ZDB-GENE-040426-2133]	http://zfin.org/ZDB-GENE-040426-2133	http://zfin.org/ZDB-GENE-040426-2133	2.39937e-07	-0.511933	0.798	0.85	2
ENSDARG00000054804	anp32e	acidic (leucine-rich) nuclear phosphoprotein 32 family, member E [Source:ZFIN;Acc:ZDB-GENE-040426-2448]	http://zfin.org/ZDB-GENE-040426-2448	http://zfin.org/ZDB-GENE-040426-2448	5.67595e-07	-0.511593	0.842	0.883	2
ENSDARG00000018425	ddx61	DEAD (Asp-Glu-Ala-Asp) box helicase 61 [Source:ZFIN;Acc:ZDB-GENE-030131-6611]	http://zfin.org/ZDB-GENE-030131-6611	http://zfin.org/ZDB-GENE-030131-6611	2.8305e-06	-0.511532	0.412	0.567	2
ENSDARG00000007141	psmc3	proteasome 26S subunit, ATPase 3 [Source:ZFIN;Acc:ZDB-GENE-030131-666]	http://zfin.org/ZDB-GENE-030131-666	http://zfin.org/ZDB-GENE-030131-666	2.70285e-05	-0.510603	0.333	0.517	2
ENSDARG00000004757	ybx1	Y box binding protein 1 [Source:ZFIN;Acc:ZDB-GENE-000629-3]	http://zfin.org/ZDB-GENE-000629-3	http://zfin.org/ZDB-GENE-000629-3	2.35994e-07	-0.51029	0.974	0.967	2
ENSDARG00000013863	fam133b	family with sequence similarity 133, member B [Source:ZFIN;Acc:ZDB-GENE-060503-229]	http://zfin.org/ZDB-GENE-060503-229	http://zfin.org/ZDB-GENE-060503-229	9.0425e-06	-0.509205	0.421	0.583	2
ENSDARG00000058451	rpl6	ribosomal protein L6 [Source:ZFIN;Acc:ZDB-GENE-030131-8671]	http://zfin.org/ZDB-GENE-030131-8671	http://zfin.org/ZDB-GENE-030131-8671	2.05439e-08	-0.509029	0.991	1	2
ENSDARG00000012274	eif4e1c	eukaryotic translation initiation factor 4E family member 1c [Source:ZFIN;Acc:ZDB-GENE-050417-398]	http://zfin.org/ZDB-GENE-050417-398	http://zfin.org/ZDB-GENE-050417-398	1.84095e-06	-0.508426	0.114	0.383	2
ENSDARG00000018574	sf3b4	splicing factor 3b, subunit 4 [Source:ZFIN;Acc:ZDB-GENE-020419-22]	http://zfin.org/ZDB-GENE-020419-22	http://zfin.org/ZDB-GENE-020419-22	5.48066e-06	-0.508184	0.219	0.467	2
ENSDARG00000062020	gse1	Gse1 coiled-coil protein [Source:ZFIN;Acc:ZDB-GENE-030131-9569]	http://zfin.org/ZDB-GENE-030131-9569	http://zfin.org/ZDB-GENE-030131-9569	0.000346013	-0.506827	0.061	0.233	2
ENSDARG00000056133	kitb	v-kit Hardy-Zuckerman 4 feline sarcoma viral oncogene homolog b [Source:ZFIN;Acc:ZDB-GENE-050916-2]	http://zfin.org/ZDB-GENE-050916-2	http://zfin.org/ZDB-GENE-050916-2	3.03921e-07	-0.506641	0.079	0.283	2
ENSDARG00000002710	ncl	nucleolin [Source:ZFIN;Acc:ZDB-GENE-030131-6986]	http://zfin.org/ZDB-GENE-030131-6986	http://zfin.org/ZDB-GENE-030131-6986	2.36895e-07	-0.504848	0.491	0.617	2
ENSDARG00000057691	srsf1a	serine/arginine-rich splicing factor 1a [Source:ZFIN;Acc:ZDB-GENE-040426-1950]	http://zfin.org/ZDB-GENE-040426-1950	http://zfin.org/ZDB-GENE-040426-1950	0.000166602	-0.502541	0.246	0.45	2
ENSDARG00000013623	vdac2	voltage-dependent anion channel 2 [Source:ZFIN;Acc:ZDB-GENE-030131-845]	http://zfin.org/ZDB-GENE-030131-845	http://zfin.org/ZDB-GENE-030131-845	5.85106e-08	-0.5014	0.763	0.817	2
ENSDARG00000009544	cldnb	claudin b [Source:ZFIN;Acc:ZDB-GENE-010328-2]	http://zfin.org/ZDB-GENE-010328-2	http://zfin.org/ZDB-GENE-010328-2	6.50064e-06	-0.499788	0.956	0.95	2
ENSDARG00000100223	si:zfos-1011f11.1	si:zfos-1011f11.1 [Source:ZFIN;Acc:ZDB-GENE-080229-4]	http://zfin.org/ZDB-GENE-080229-4	http://zfin.org/ZDB-GENE-080229-4	5.06262e-09	-0.498854	0.193	0.367	2
ENSDARG00000007377	odc1	ornithine decarboxylase 1 [Source:ZFIN;Acc:ZDB-GENE-010816-1]	http://zfin.org/ZDB-GENE-010816-1	http://zfin.org/ZDB-GENE-010816-1	0.00036475	-0.498359	0.07	0.3	2
ENSDARG00000016871	smarce1	SWI/SNF related, matrix associated, actin dependent regulator of chromatin, subfamily e, member 1 [Source:ZFIN;Acc:ZDB-GENE-030131-967]	http://zfin.org/ZDB-GENE-030131-967	http://zfin.org/ZDB-GENE-030131-967	2.57034e-07	-0.497172	0.526	0.65	2
ENSDARG00000093349	si:ch211-141e20.2	si:ch211-141e20.2 [Source:ZFIN;Acc:ZDB-GENE-070912-75]	http://zfin.org/ZDB-GENE-070912-75	http://zfin.org/ZDB-GENE-070912-75	0.00502845	-0.497031	0.132	0.3	2
ENSDARG00000013966	psma6b	proteasome subunit alpha 6b [Source:ZFIN;Acc:ZDB-GENE-040718-329]	http://zfin.org/ZDB-GENE-040718-329	http://zfin.org/ZDB-GENE-040718-329	2.5561e-07	-0.496724	0.491	0.65	2
ENSDARG00000043561	psmc1b	proteasome 26S subunit, ATPase 1b [Source:ZFIN;Acc:ZDB-GENE-040625-69]	http://zfin.org/ZDB-GENE-040625-69	http://zfin.org/ZDB-GENE-040625-69	4.0403e-09	-0.496507	0.228	0.433	2
ENSDARG00000011740	u2af2b	U2 small nuclear RNA auxiliary factor 2b [Source:ZFIN;Acc:ZDB-GENE-040426-1881]	http://zfin.org/ZDB-GENE-040426-1881	http://zfin.org/ZDB-GENE-040426-1881	9.4461e-07	-0.491816	0.254	0.433	2
ENSDARG00000069342	zgc:153115	zgc:153115 [Source:ZFIN;Acc:ZDB-GENE-061013-418]	http://zfin.org/ZDB-GENE-061013-418	http://zfin.org/ZDB-GENE-061013-418	0.000191374	-0.491703	0.114	0.35	2
ENSDARG00000035993	sumo3b	small ubiquitin-like modifier 3b [Source:ZFIN;Acc:ZDB-GENE-040718-426]	http://zfin.org/ZDB-GENE-040718-426	http://zfin.org/ZDB-GENE-040718-426	3.43534e-05	-0.491329	0.202	0.383	2
ENSDARG00000037030	casz1	castor zinc finger 1 [Source:ZFIN;Acc:ZDB-GENE-060130-108]	http://zfin.org/ZDB-GENE-060130-108	http://zfin.org/ZDB-GENE-060130-108	8.17909e-05	-0.491306	0.368	0.5	2
ENSDARG00000029353	serpine2	serpin peptidase inhibitor, clade E (nexin, plasminogen activator inhibitor type 1), member 2 [Source:ZFIN;Acc:ZDB-GENE-040426-848]	http://zfin.org/ZDB-GENE-040426-848	http://zfin.org/ZDB-GENE-040426-848	0.000178745	-0.491202	0.237	0.45	2
ENSDARG00000020311	cnih1	cornichon family AMPA receptor auxiliary protein 1 [Source:ZFIN;Acc:ZDB-GENE-040426-1944]	http://zfin.org/ZDB-GENE-040426-1944	http://zfin.org/ZDB-GENE-040426-1944	3.84435e-12	-0.489326	0.281	0.45	2
ENSDARG00000058454	dynll1	dynein, light chain, LC8-type 1 [Source:ZFIN;Acc:ZDB-GENE-040426-1961]	http://zfin.org/ZDB-GENE-040426-1961	http://zfin.org/ZDB-GENE-040426-1961	6.57366e-08	-0.489223	0.974	0.933	2
ENSDARG00000001557	tomm34	translocase of outer mitochondrial membrane 34 [Source:ZFIN;Acc:ZDB-GENE-030131-2081]	http://zfin.org/ZDB-GENE-030131-2081	http://zfin.org/ZDB-GENE-030131-2081	4.72893e-07	-0.489009	0.096	0.3	2
ENSDARG00000055129	pim3	Pim-3 proto-oncogene, serine/threonine kinase [Source:ZFIN;Acc:ZDB-GENE-050809-111]	http://zfin.org/ZDB-GENE-050809-111	http://zfin.org/ZDB-GENE-050809-111	1.41503e-08	-0.488493	0.412	0.45	2
ENSDARG00000074244	arhgef10lb	Rho guanine nucleotide exchange factor (GEF) 10-like b [Source:ZFIN;Acc:ZDB-GENE-090313-222]	http://zfin.org/ZDB-GENE-090313-222	http://zfin.org/ZDB-GENE-090313-222	0.000382447	-0.487915	0.035	0.167	2
ENSDARG00000075864	igsf9a	immunoglobulin superfamily, member 9a [Source:ZFIN;Acc:ZDB-GENE-060503-288]	http://zfin.org/ZDB-GENE-060503-288	http://zfin.org/ZDB-GENE-060503-288	0.00278461	-0.485513	0.333	0.417	2
ENSDARG00000090462	mrpl20	mitochondrial ribosomal protein L20 [Source:ZFIN;Acc:ZDB-GENE-030131-5299]	http://zfin.org/ZDB-GENE-030131-5299	http://zfin.org/ZDB-GENE-030131-5299	5.02327e-05	-0.485488	0.404	0.583	2
ENSDARG00000055739	ribc1	RIB43A domain with coiled-coils 1 [Source:ZFIN;Acc:ZDB-GENE-081031-7]	http://zfin.org/ZDB-GENE-081031-7	http://zfin.org/ZDB-GENE-081031-7	2.25423e-11	-0.485477	0.5	0.45	2
ENSDARG00000030716	ing4	inhibitor of growth family, member 4 [Source:ZFIN;Acc:ZDB-GENE-050522-47]	http://zfin.org/ZDB-GENE-050522-47	http://zfin.org/ZDB-GENE-050522-47	2.98448e-06	-0.485182	0.404	0.583	2
ENSDARG00000100188	RNPS1 (1 of many)	RNA binding protein with serine rich domain 1 [Source:HGNC Symbol;Acc:HGNC:10080]	http://zfin.org/	http://zfin.org/	2.27475e-06	-0.484845	0.263	0.417	2
ENSDARG00000005560	ywhah	tyrosine 3-monooxygenase/tryptophan 5-monooxygenase activation protein, eta polypeptide [Source:ZFIN;Acc:ZDB-GENE-040426-2191]	http://zfin.org/ZDB-GENE-040426-2191	http://zfin.org/ZDB-GENE-040426-2191	0.00179528	-0.484356	0.167	0.367	2
ENSDARG00000062420	nfia	nuclear factor I/A [Source:ZFIN;Acc:ZDB-GENE-050208-501]	http://zfin.org/ZDB-GENE-050208-501	http://zfin.org/ZDB-GENE-050208-501	1.95583e-06	-0.483839	0.026	0.267	2
ENSDARG00000009978	icn	ictacalcin [Source:ZFIN;Acc:ZDB-GENE-030131-8599]	http://zfin.org/ZDB-GENE-030131-8599	http://zfin.org/ZDB-GENE-030131-8599	0.000139163	-0.483351	0.763	0.733	2
ENSDARG00000096403	CT027638.1		http://zfin.org/	http://zfin.org/	0.00125392	-0.482458	0.211	0.317	2
ENSDARG00000030789	ddx18	DEAD (Asp-Glu-Ala-Asp) box polypeptide 18 [Source:ZFIN;Acc:ZDB-GENE-030131-9685]	http://zfin.org/ZDB-GENE-030131-9685	http://zfin.org/ZDB-GENE-030131-9685	8.52371e-06	-0.482437	0.053	0.3	2
ENSDARG00000005191	ahcy	adenosylhomocysteinase [Source:ZFIN;Acc:ZDB-GENE-031219-6]	http://zfin.org/ZDB-GENE-031219-6	http://zfin.org/ZDB-GENE-031219-6	1.62415e-11	-0.48175	0.237	0.383	2
ENSDARG00000075853	sh3kbp1	SH3-domain kinase binding protein 1 [Source:ZFIN;Acc:ZDB-GENE-091204-186]	http://zfin.org/ZDB-GENE-091204-186	http://zfin.org/ZDB-GENE-091204-186	0.00102397	-0.481176	0.079	0.283	2
ENSDARG00000003098	kdm5bb	lysine (K)-specific demethylase 5Bb [Source:ZFIN;Acc:ZDB-GENE-030424-1]	http://zfin.org/ZDB-GENE-030424-1	http://zfin.org/ZDB-GENE-030424-1	7.1753e-06	-0.480958	0.202	0.333	2
ENSDARG00000098852	smdt1b	single-pass membrane protein with aspartate-rich tail 1b [Source:ZFIN;Acc:ZDB-GENE-141212-9]	http://zfin.org/ZDB-GENE-141212-9	http://zfin.org/ZDB-GENE-141212-9	0.000159754	-0.480816	0.763	0.9	2
ENSDARG00000030116	susd6	sushi domain containing 6 [Source:ZFIN;Acc:ZDB-GENE-030131-8832]	http://zfin.org/ZDB-GENE-030131-8832	http://zfin.org/ZDB-GENE-030131-8832	0.000449277	-0.480712	0.298	0.45	2
ENSDARG00000021112	c1d	C1D nuclear receptor corepressor [Source:ZFIN;Acc:ZDB-GENE-041024-8]	http://zfin.org/ZDB-GENE-041024-8	http://zfin.org/ZDB-GENE-041024-8	8.93404e-07	-0.479514	0.096	0.25	2
ENSDARG00000012234	psme3	proteasome activator subunit 3 [Source:ZFIN;Acc:ZDB-GENE-991110-19]	http://zfin.org/ZDB-GENE-991110-19	http://zfin.org/ZDB-GENE-991110-19	4.84826e-07	-0.479471	0.149	0.35	2
ENSDARG00000099664	2017-09-15	selenoprotein 15 [Source:ZFIN;Acc:ZDB-GENE-030327-1]	http://zfin.org/ZDB-GENE-030327-1	http://zfin.org/ZDB-GENE-030327-1	4.74265e-08	-0.477559	0.561	0.617	2
ENSDARG00000075616	polr2k	polymerase (RNA) II (DNA directed) polypeptide K [Source:ZFIN;Acc:ZDB-GENE-070820-18]	http://zfin.org/ZDB-GENE-070820-18	http://zfin.org/ZDB-GENE-070820-18	1.17688e-06	-0.477087	0.386	0.517	2
ENSDARG00000030999	mybl1	v-myb avian myeloblastosis viral oncogene homolog-like 1 [Source:ZFIN;Acc:ZDB-GENE-041111-281]	http://zfin.org/ZDB-GENE-041111-281	http://zfin.org/ZDB-GENE-041111-281	1.60996e-06	-0.476207	0.026	0.25	2
ENSDARG00000008243	cct8	chaperonin containing TCP1, subunit 8 (theta) [Source:ZFIN;Acc:ZDB-GENE-040426-876]	http://zfin.org/ZDB-GENE-040426-876	http://zfin.org/ZDB-GENE-040426-876	0.000999683	-0.474554	0.377	0.567	2
ENSDARG00000004621	gpm6ab	glycoprotein M6Ab [Source:ZFIN;Acc:ZDB-GENE-030710-8]	http://zfin.org/ZDB-GENE-030710-8	http://zfin.org/ZDB-GENE-030710-8	2.55941e-05	-0.474035	0.035	0.233	2
ENSDARG00000092112	tomm40	translocase of outer mitochondrial membrane 40 homolog (yeast) [Source:ZFIN;Acc:ZDB-GENE-030131-1365]	http://zfin.org/ZDB-GENE-030131-1365	http://zfin.org/ZDB-GENE-030131-1365	8.33898e-10	-0.473606	0.149	0.383	2
ENSDARG00000099312	hn1b	hematological and neurological expressed 1b [Source:ZFIN;Acc:ZDB-GENE-030131-2784]	http://zfin.org/ZDB-GENE-030131-2784	http://zfin.org/ZDB-GENE-030131-2784	3.46727e-10	-0.472526	0.544	0.55	2
ENSDARG00000035679	si:rp71-45k5.4	si:rp71-45k5.4 [Source:ZFIN;Acc:ZDB-GENE-060503-941]	http://zfin.org/ZDB-GENE-060503-941	http://zfin.org/ZDB-GENE-060503-941	0.000157944	-0.472025	0.596	0.767	2
ENSDARG00000056961	ccdc30	coiled-coil domain containing 30 [Source:ZFIN;Acc:ZDB-GENE-130530-667]	http://zfin.org/ZDB-GENE-130530-667	http://zfin.org/ZDB-GENE-130530-667	0.000353883	-0.471631	0.132	0.35	2
ENSDARG00000087640	nsfl1c	NSFL1 (p97) cofactor (p47) [Source:ZFIN;Acc:ZDB-GENE-041114-160]	http://zfin.org/ZDB-GENE-041114-160	http://zfin.org/ZDB-GENE-041114-160	2.86968e-08	-0.471331	0.544	0.65	2
ENSDARG00000074758	csde1	cold shock domain containing E1, RNA-binding [Source:ZFIN;Acc:ZDB-GENE-030131-8623]	http://zfin.org/ZDB-GENE-030131-8623	http://zfin.org/ZDB-GENE-030131-8623	0.000330267	-0.470049	0.272	0.5	2
ENSDARG00000004735	hnrnpub	heterogeneous nuclear ribonucleoprotein Ub [Source:ZFIN;Acc:ZDB-GENE-030131-6422]	http://zfin.org/ZDB-GENE-030131-6422	http://zfin.org/ZDB-GENE-030131-6422	0.000147352	-0.468759	0.254	0.417	2
ENSDARG00000025391	pfdn2	prefoldin subunit 2 [Source:ZFIN;Acc:ZDB-GENE-060519-27]	http://zfin.org/ZDB-GENE-060519-27	http://zfin.org/ZDB-GENE-060519-27	2.85867e-07	-0.468661	0.289	0.5	2
ENSDARG00000056803	ap1s1	adaptor-related protein complex 1, sigma 1 subunit [Source:ZFIN;Acc:ZDB-GENE-040426-1119]	http://zfin.org/ZDB-GENE-040426-1119	http://zfin.org/ZDB-GENE-040426-1119	1.12625e-06	-0.4684	0.842	0.833	2
ENSDARG00000021582	dynlrb1	dynein, light chain, roadblock-type 1 [Source:ZFIN;Acc:ZDB-GENE-040426-989]	http://zfin.org/ZDB-GENE-040426-989	http://zfin.org/ZDB-GENE-040426-989	2.02632e-07	-0.468368	0.728	0.767	2
ENSDARG00000013382	cwc15	CWC15 spliceosome-associated protein homolog (S. cerevisiae) [Source:ZFIN;Acc:ZDB-GENE-040625-10]	http://zfin.org/ZDB-GENE-040625-10	http://zfin.org/ZDB-GENE-040625-10	2.75627e-05	-0.467717	0.605	0.65	2
ENSDARG00000014222	zgc:86598	zgc:86598 [Source:ZFIN;Acc:ZDB-GENE-040625-181]	http://zfin.org/ZDB-GENE-040625-181	http://zfin.org/ZDB-GENE-040625-181	7.07751e-06	-0.466117	0.298	0.5	2
ENSDARG00000013575	rfx2	regulatory factor X, 2 (influences HLA class II expression) [Source:ZFIN;Acc:ZDB-GENE-050227-4]	http://zfin.org/ZDB-GENE-050227-4	http://zfin.org/ZDB-GENE-050227-4	6.16484e-08	-0.466114	0.237	0.417	2
ENSDARG00000013776	thop1	thimet oligopeptidase 1 [Source:ZFIN;Acc:ZDB-GENE-040718-47]	http://zfin.org/ZDB-GENE-040718-47	http://zfin.org/ZDB-GENE-040718-47	1.40326e-05	-0.465695	0.202	0.35	2
ENSDARG00000077982	elf3	E74-like factor 3 (ets domain transcription factor, epithelial-specific ) [Source:ZFIN;Acc:ZDB-GENE-030131-8760]	http://zfin.org/ZDB-GENE-030131-8760	http://zfin.org/ZDB-GENE-030131-8760	6.85315e-05	-0.463684	0.386	0.483	2
ENSDARG00000018241	mfap1	microfibrillar-associated protein 1 [Source:ZFIN;Acc:ZDB-GENE-040426-1075]	http://zfin.org/ZDB-GENE-040426-1075	http://zfin.org/ZDB-GENE-040426-1075	2.88007e-08	-0.463263	0.246	0.317	2
ENSDARG00000006773	elovl4a	ELOVL fatty acid elongase 4a [Source:ZFIN;Acc:ZDB-GENE-040426-1767]	http://zfin.org/ZDB-GENE-040426-1767	http://zfin.org/ZDB-GENE-040426-1767	7.58131e-07	-0.463099	0.228	0.467	2
ENSDARG00000058349	polr2l	polymerase (RNA) II (DNA directed) polypeptide L [Source:ZFIN;Acc:ZDB-GENE-050522-181]	http://zfin.org/ZDB-GENE-050522-181	http://zfin.org/ZDB-GENE-050522-181	3.85697e-05	-0.46252	0.404	0.55	2
ENSDARG00000053026	kif19	kinesin family member 19 [Source:ZFIN;Acc:ZDB-GENE-080215-2]	http://zfin.org/ZDB-GENE-080215-2	http://zfin.org/ZDB-GENE-080215-2	0.00193682	-0.462434	0.07	0.283	2
ENSDARG00000019004	smarcd1	SWI/SNF related, matrix associated, actin dependent regulator of chromatin, subfamily d, member 1 [Source:ZFIN;Acc:ZDB-GENE-030131-1835]	http://zfin.org/ZDB-GENE-030131-1835	http://zfin.org/ZDB-GENE-030131-1835	1.09204e-05	-0.462353	0.184	0.383	2
ENSDARG00000003142	dachc	dachshund c [Source:ZFIN;Acc:ZDB-GENE-020402-5]	http://zfin.org/ZDB-GENE-020402-5	http://zfin.org/ZDB-GENE-020402-5	2.39232e-05	-0.459831	0.026	0.2	2
ENSDARG00000045373	pabpn1	poly(A) binding protein, nuclear 1 [Source:ZFIN;Acc:ZDB-GENE-040426-2401]	http://zfin.org/ZDB-GENE-040426-2401	http://zfin.org/ZDB-GENE-040426-2401	9.26639e-08	-0.458463	0.605	0.617	2
ENSDARG00000037397	ssrp1a	structure specific recognition protein 1a [Source:ZFIN;Acc:ZDB-GENE-031118-9]	http://zfin.org/ZDB-GENE-031118-9	http://zfin.org/ZDB-GENE-031118-9	3.30784e-07	-0.458141	0.035	0.283	2
ENSDARG00000087636	hmgn6	high mobility group nucleosome binding domain 6 [Source:ZFIN;Acc:ZDB-GENE-030131-1005]	http://zfin.org/ZDB-GENE-030131-1005	http://zfin.org/ZDB-GENE-030131-1005	7.49334e-08	-0.458069	0.956	0.9	2
ENSDARG00000032175	puf60a	poly-U binding splicing factor a [Source:ZFIN;Acc:ZDB-GENE-030131-2891]	http://zfin.org/ZDB-GENE-030131-2891	http://zfin.org/ZDB-GENE-030131-2891	0.000235581	-0.45791	0.184	0.45	2
ENSDARG00000039729	asap1b	ArfGAP with SH3 domain, ankyrin repeat and PH domain 1b [Source:ZFIN;Acc:ZDB-GENE-091112-16]	http://zfin.org/ZDB-GENE-091112-16	http://zfin.org/ZDB-GENE-091112-16	1.86682e-07	-0.457333	0.64	0.567	2
ENSDARG00000013250	tars	threonyl-tRNA synthetase [Source:ZFIN;Acc:ZDB-GENE-041010-218]	http://zfin.org/ZDB-GENE-041010-218	http://zfin.org/ZDB-GENE-041010-218	1.6149e-05	-0.457262	0.132	0.333	2
ENSDARG00000038068	ddx5	DEAD (Asp-Glu-Ala-Asp) box helicase 5 [Source:ZFIN;Acc:ZDB-GENE-030131-925]	http://zfin.org/ZDB-GENE-030131-925	http://zfin.org/ZDB-GENE-030131-925	9.62825e-06	-0.456223	0.956	0.933	2
ENSDARG00000053912	fbl	fibrillarin [Source:ZFIN;Acc:ZDB-GENE-040426-1936]	http://zfin.org/ZDB-GENE-040426-1936	http://zfin.org/ZDB-GENE-040426-1936	0.00189327	-0.455542	0.167	0.35	2
ENSDARG00000003607	nr2f6a	nuclear receptor subfamily 2, group F, member 6a [Source:ZFIN;Acc:ZDB-GENE-030131-4362]	http://zfin.org/ZDB-GENE-030131-4362	http://zfin.org/ZDB-GENE-030131-4362	7.01684e-05	-0.454184	0.123	0.417	2
ENSDARG00000020345	clasp2	cytoplasmic linker associated protein 2 [Source:ZFIN;Acc:ZDB-GENE-040426-2343]	http://zfin.org/ZDB-GENE-040426-2343	http://zfin.org/ZDB-GENE-040426-2343	0.000121994	-0.453747	0.07	0.167	2
ENSDARG00000055064	prdx5	peroxiredoxin 5 [Source:ZFIN;Acc:ZDB-GENE-050522-159]	http://zfin.org/ZDB-GENE-050522-159	http://zfin.org/ZDB-GENE-050522-159	4.59524e-06	-0.453517	0.772	0.667	2
ENSDARG00000078898	pcdh7a	protocadherin 7a [Source:ZFIN;Acc:ZDB-GENE-120206-1]	http://zfin.org/ZDB-GENE-120206-1	http://zfin.org/ZDB-GENE-120206-1	6.17903e-05	-0.453298	0.14	0.25	2
ENSDARG00000021252	cct6a	chaperonin containing TCP1, subunit 6A (zeta 1) [Source:ZFIN;Acc:ZDB-GENE-011018-2]	http://zfin.org/ZDB-GENE-011018-2	http://zfin.org/ZDB-GENE-011018-2	0.00183941	-0.453094	0.342	0.517	2
ENSDARG00000003941	rrs1	RRS1 ribosome biogenesis regulator homolog (S. cerevisiae) [Source:ZFIN;Acc:ZDB-GENE-030131-9345]	http://zfin.org/ZDB-GENE-030131-9345	http://zfin.org/ZDB-GENE-030131-9345	0.000190459	-0.453019	0.061	0.233	2
ENSDARG00000006200	eif4g1a	eukaryotic translation initiation factor 4 gamma, 1a [Source:ZFIN;Acc:ZDB-GENE-070112-702]	http://zfin.org/ZDB-GENE-070112-702	http://zfin.org/ZDB-GENE-070112-702	4.84849e-05	-0.452599	0.114	0.367	2
ENSDARG00000086411	srsf10b	serine/arginine-rich splicing factor 10b [Source:ZFIN;Acc:ZDB-GENE-040426-1415]	http://zfin.org/ZDB-GENE-040426-1415	http://zfin.org/ZDB-GENE-040426-1415	1.99828e-07	-0.452348	0.184	0.4	2
ENSDARG00000061099	nfasca	neurofascin homolog (chicken) a [Source:ZFIN;Acc:ZDB-GENE-080229-6]	http://zfin.org/ZDB-GENE-080229-6	http://zfin.org/ZDB-GENE-080229-6	1.71218e-06	-0.452159	0.079	0.233	2
ENSDARG00000039515	atf4a	activating transcription factor 4a [Source:ZFIN;Acc:ZDB-GENE-040426-2340]	http://zfin.org/ZDB-GENE-040426-2340	http://zfin.org/ZDB-GENE-040426-2340	2.80365e-05	-0.452054	0.298	0.417	2
ENSDARG00000036670	aplnrb	apelin receptor b [Source:ZFIN;Acc:ZDB-GENE-050913-90]	http://zfin.org/ZDB-GENE-050913-90	http://zfin.org/ZDB-GENE-050913-90	0.000143982	-0.45114	0.009	0.2	2
ENSDARG00000079652	CAAP1	caspase activity and apoptosis inhibitor 1 [Source:HGNC Symbol;Acc:HGNC:25834]	http://zfin.org/	http://zfin.org/	0.0002847	-0.450928	0.079	0.267	2
ENSDARG00000036456	anxa4	annexin A4 [Source:ZFIN;Acc:ZDB-GENE-030707-1]	http://zfin.org/ZDB-GENE-030707-1	http://zfin.org/ZDB-GENE-030707-1	0.00601023	-0.450283	0.544	0.717	2
ENSDARG00000055389	si:dkey-67c22.2	si:dkey-67c22.2 [Source:ZFIN;Acc:ZDB-GENE-030131-5845]	http://zfin.org/ZDB-GENE-030131-5845	http://zfin.org/ZDB-GENE-030131-5845	1.09873e-08	-0.450183	0.333	0.383	2
ENSDARG00000038835	ppid	peptidylprolyl isomerase D [Source:ZFIN;Acc:ZDB-GENE-040625-34]	http://zfin.org/ZDB-GENE-040625-34	http://zfin.org/ZDB-GENE-040625-34	5.52598e-06	-0.449419	0.544	0.667	2
ENSDARG00000011141	dpysl5a	dihydropyrimidinase-like 5a [Source:ZFIN;Acc:ZDB-GENE-030131-3136]	http://zfin.org/ZDB-GENE-030131-3136	http://zfin.org/ZDB-GENE-030131-3136	4.43698e-05	-0.449308	0.035	0.217	2
ENSDARG00000035400	btf3	basic transcription factor 3 [Source:ZFIN;Acc:ZDB-GENE-030131-8731]	http://zfin.org/ZDB-GENE-030131-8731	http://zfin.org/ZDB-GENE-030131-8731	1.32481e-09	-0.44772	0.956	0.883	2
ENSDARG00000105177	ilf3b	interleukin enhancer binding factor 3b [Source:ZFIN;Acc:ZDB-GENE-030131-587]	http://zfin.org/ZDB-GENE-030131-587	http://zfin.org/ZDB-GENE-030131-587	0.000417289	-0.447395	0.36	0.533	2
ENSDARG00000069619	atf7ip	activating transcription factor 7 interacting protein [Source:ZFIN;Acc:ZDB-GENE-061103-178]	http://zfin.org/ZDB-GENE-061103-178	http://zfin.org/ZDB-GENE-061103-178	0.000374598	-0.446564	0.281	0.5	2
ENSDARG00000062518	ulk1a	unc-51 like autophagy activating kinase 1a [Source:ZFIN;Acc:ZDB-GENE-080723-31]	http://zfin.org/ZDB-GENE-080723-31	http://zfin.org/ZDB-GENE-080723-31	4.0271e-05	-0.446442	0.132	0.283	2
ENSDARG00000004692	nabp1a	nucleic acid binding protein 1a [Source:ZFIN;Acc:ZDB-GENE-041212-71]	http://zfin.org/ZDB-GENE-041212-71	http://zfin.org/ZDB-GENE-041212-71	0.000112648	-0.446188	0.088	0.183	2
ENSDARG00000105231	setd8a	SET domain containing (lysine methyltransferase) 8a [Source:ZFIN;Acc:ZDB-GENE-060825-37]	http://zfin.org/ZDB-GENE-060825-37	http://zfin.org/ZDB-GENE-060825-37	1.37518e-06	-0.446082	0.289	0.45	2
ENSDARG00000004160	reep3b	receptor accessory protein 3b [Source:ZFIN;Acc:ZDB-GENE-040426-730]	http://zfin.org/ZDB-GENE-040426-730	http://zfin.org/ZDB-GENE-040426-730	0.000148763	-0.44549	0.649	0.767	2
ENSDARG00000016443	eif3c	eukaryotic translation initiation factor 3, subunit C [Source:ZFIN;Acc:ZDB-GENE-030131-6166]	http://zfin.org/ZDB-GENE-030131-6166	http://zfin.org/ZDB-GENE-030131-6166	3.09549e-07	-0.445239	0.404	0.5	2
ENSDARG00000026185	ccdc94	coiled-coil domain containing 94 [Source:ZFIN;Acc:ZDB-GENE-040426-841]	http://zfin.org/ZDB-GENE-040426-841	http://zfin.org/ZDB-GENE-040426-841	1.80409e-05	-0.444968	0.149	0.317	2
ENSDARG00000033597	api5	apoptosis inhibitor 5 [Source:ZFIN;Acc:ZDB-GENE-030131-395]	http://zfin.org/ZDB-GENE-030131-395	http://zfin.org/ZDB-GENE-030131-395	2.37631e-07	-0.444387	0.307	0.45	2
ENSDARG00000074161	tnrc6b	trinucleotide repeat containing 6b [Source:ZFIN;Acc:ZDB-GENE-030131-13]	http://zfin.org/ZDB-GENE-030131-13	http://zfin.org/ZDB-GENE-030131-13	1.96935e-07	-0.443408	0.228	0.4	2
ENSDARG00000041306	mrps25	mitochondrial ribosomal protein S25 [Source:ZFIN;Acc:ZDB-GENE-050417-52]	http://zfin.org/ZDB-GENE-050417-52	http://zfin.org/ZDB-GENE-050417-52	4.42618e-05	-0.443107	0.246	0.433	2
ENSDARG00000023279	psmd4b	proteasome 26S subunit, non-ATPase 4b [Source:ZFIN;Acc:ZDB-GENE-050417-96]	http://zfin.org/ZDB-GENE-050417-96	http://zfin.org/ZDB-GENE-050417-96	9.63326e-08	-0.442553	0.395	0.483	2
ENSDARG00000061774	mbd3a	methyl-CpG binding domain protein 3a [Source:ZFIN;Acc:ZDB-GENE-030131-9077]	http://zfin.org/ZDB-GENE-030131-9077	http://zfin.org/ZDB-GENE-030131-9077	1.46643e-05	-0.442414	0.368	0.533	2
ENSDARG00000044457	gfi1ab	growth factor independent 1A transcription repressor b [Source:ZFIN;Acc:ZDB-GENE-040116-8]	http://zfin.org/ZDB-GENE-040116-8	http://zfin.org/ZDB-GENE-040116-8	0.00128152	-0.442091	0.096	0.333	2
ENSDARG00000013031	mta2	metastasis associated 1 family, member 2 [Source:ZFIN;Acc:ZDB-GENE-030131-4803]	http://zfin.org/ZDB-GENE-030131-4803	http://zfin.org/ZDB-GENE-030131-4803	3.94769e-07	-0.441515	0.105	0.333	2
ENSDARG00000069175	vps4b	vacuolar protein sorting 4b homolog B (S. cerevisiae) [Source:ZFIN;Acc:ZDB-GENE-040426-1235]	http://zfin.org/ZDB-GENE-040426-1235	http://zfin.org/ZDB-GENE-040426-1235	4.51129e-07	-0.440439	0.553	0.6	2
ENSDARG00000071060	naa10	N(alpha)-acetyltransferase 10, NatA catalytic subunit [Source:ZFIN;Acc:ZDB-GENE-040426-2648]	http://zfin.org/ZDB-GENE-040426-2648	http://zfin.org/ZDB-GENE-040426-2648	1.596e-07	-0.439908	0.544	0.65	2
ENSDARG00000024954	tmed4	transmembrane p24 trafficking protein 4 [Source:ZFIN;Acc:ZDB-GENE-040625-140]	http://zfin.org/ZDB-GENE-040625-140	http://zfin.org/ZDB-GENE-040625-140	0.000359946	-0.439873	0.281	0.45	2
ENSDARG00000074979	larp4ab	La ribonucleoprotein domain family, member 4Ab [Source:ZFIN;Acc:ZDB-GENE-100729-2]	http://zfin.org/ZDB-GENE-100729-2	http://zfin.org/ZDB-GENE-100729-2	0.00488035	-0.439283	0.202	0.317	2
ENSDARG00000004386	si:dkey-153k10.9	si:dkey-153k10.9 [Source:ZFIN;Acc:ZDB-GENE-030131-3893]	http://zfin.org/ZDB-GENE-030131-3893	http://zfin.org/ZDB-GENE-030131-3893	4.35025e-07	-0.43923	0.114	0.25	2
ENSDARG00000045874	yeats4	YEATS domain containing 4 [Source:ZFIN;Acc:ZDB-GENE-040718-252]	http://zfin.org/ZDB-GENE-040718-252	http://zfin.org/ZDB-GENE-040718-252	0.00844676	-0.438364	0.158	0.333	2
ENSDARG00000038141	atf4b	activating transcription factor 4b [Source:ZFIN;Acc:ZDB-GENE-070928-23]	http://zfin.org/ZDB-GENE-070928-23	http://zfin.org/ZDB-GENE-070928-23	0.00030606	-0.436501	0.895	0.9	2
ENSDARG00000101295	psmd4a	proteasome 26S subunit, non-ATPase 4a [Source:ZFIN;Acc:ZDB-GENE-040625-104]	http://zfin.org/ZDB-GENE-040625-104	http://zfin.org/ZDB-GENE-040625-104	1.85793e-06	-0.435928	0.298	0.5	2
ENSDARG00000086416	med11	mediator complex subunit 11 [Source:ZFIN;Acc:ZDB-GENE-091207-2]	http://zfin.org/ZDB-GENE-091207-2	http://zfin.org/ZDB-GENE-091207-2	6.10991e-06	-0.435591	0.184	0.417	2
ENSDARG00000027249	btg1	B-cell translocation gene 1, anti-proliferative [Source:ZFIN;Acc:ZDB-GENE-010726-1]	http://zfin.org/ZDB-GENE-010726-1	http://zfin.org/ZDB-GENE-010726-1	4.0546e-06	-0.434798	0.675	0.6	2
ENSDARG00000031983	six4b	SIX homeobox 4b [Source:ZFIN;Acc:ZDB-GENE-010201-1]	http://zfin.org/ZDB-GENE-010201-1	http://zfin.org/ZDB-GENE-010201-1	0.00122691	-0.433911	0.36	0.55	2
ENSDARG00000090872	si:dkey-276j7.1	si:dkey-276j7.1 [Source:ZFIN;Acc:ZDB-GENE-060720-44]	http://zfin.org/ZDB-GENE-060720-44	http://zfin.org/ZDB-GENE-060720-44	1.98758e-05	-0.433182	0.018	0.233	2
ENSDARG00000079632	POLD4	si:dkey-28b4.7 [Source:ZFIN;Acc:ZDB-GENE-050506-118]	http://zfin.org/ZDB-GENE-050506-118	http://zfin.org/ZDB-GENE-050506-118	0.000626911	-0.433137	0.553	0.65	2
ENSDARG00000059398	myef2	myelin expression factor 2 [Source:ZFIN;Acc:ZDB-GENE-051120-114]	http://zfin.org/ZDB-GENE-051120-114	http://zfin.org/ZDB-GENE-051120-114	4.87157e-06	-0.432443	0.289	0.433	2
ENSDARG00000003189	psmd1	proteasome 26S subunit, non-ATPase 1 [Source:ZFIN;Acc:ZDB-GENE-040426-810]	http://zfin.org/ZDB-GENE-040426-810	http://zfin.org/ZDB-GENE-040426-810	7.1837e-06	-0.431724	0.298	0.433	2
ENSDARG00000014571	ctnnb1	catenin (cadherin-associated protein), beta 1 [Source:ZFIN;Acc:ZDB-GENE-980526-362]	http://zfin.org/ZDB-GENE-980526-362	http://zfin.org/ZDB-GENE-980526-362	0.0021907	-0.430372	0.465	0.7	2
ENSDARG00000058690	cgnb	cingulin b [Source:ZFIN;Acc:ZDB-GENE-050208-72]	http://zfin.org/ZDB-GENE-050208-72	http://zfin.org/ZDB-GENE-050208-72	0.000319635	-0.429518	0.132	0.317	2
ENSDARG00000037746	actb1	actin, beta 1 [Source:ZFIN;Acc:ZDB-GENE-000329-1]	http://zfin.org/ZDB-GENE-000329-1	http://zfin.org/ZDB-GENE-000329-1	3.81317e-05	-0.429053	0.965	0.95	2
ENSDARG00000077405	psip1b	PC4 and SFRS1 interacting protein 1b [Source:ZFIN;Acc:ZDB-GENE-030131-3273]	http://zfin.org/ZDB-GENE-030131-3273	http://zfin.org/ZDB-GENE-030131-3273	0.003875	-0.428745	0.43	0.55	2
ENSDARG00000039185	nfyba	nuclear transcription factor Y, beta a [Source:ZFIN;Acc:ZDB-GENE-050417-13]	http://zfin.org/ZDB-GENE-050417-13	http://zfin.org/ZDB-GENE-050417-13	5.31775e-05	-0.428684	0.351	0.45	2
ENSDARG00000040192	nenf	neudesin neurotrophic factor [Source:ZFIN;Acc:ZDB-GENE-050320-129]	http://zfin.org/ZDB-GENE-050320-129	http://zfin.org/ZDB-GENE-050320-129	0.000192805	-0.428615	0.395	0.583	2
ENSDARG00000030479	hmgb1b	high mobility group box 1b [Source:ZFIN;Acc:ZDB-GENE-030131-8480]	http://zfin.org/ZDB-GENE-030131-8480	http://zfin.org/ZDB-GENE-030131-8480	9.89885e-07	-0.428381	0.64	0.583	2
ENSDARG00000063911	mt-atp6	ATP synthase 6, mitochondrial [Source:ZFIN;Acc:ZDB-GENE-011205-18]	http://zfin.org/ZDB-GENE-011205-18	http://zfin.org/ZDB-GENE-011205-18	0.000221246	-0.427753	1	1	2
ENSDARG00000056740	tmeff1b	transmembrane protein with EGF-like and two follistatin-like domains 1b [Source:ZFIN;Acc:ZDB-GENE-050706-143]	http://zfin.org/ZDB-GENE-050706-143	http://zfin.org/ZDB-GENE-050706-143	0.000250632	-0.426723	0.026	0.2	2
ENSDARG00000052567	tmem35	transmembrane protein 35 [Source:ZFIN;Acc:ZDB-GENE-030815-1]	http://zfin.org/ZDB-GENE-030815-1	http://zfin.org/ZDB-GENE-030815-1	3.81435e-06	-0.426614	0.342	0.4	2
ENSDARG00000099175	hmgb1a	high mobility group box 1a [Source:ZFIN;Acc:ZDB-GENE-030131-341]	http://zfin.org/ZDB-GENE-030131-341	http://zfin.org/ZDB-GENE-030131-341	5.33079e-07	-0.426075	0.904	0.783	2
ENSDARG00000068893	mettl5	methyltransferase like 5 [Source:ZFIN;Acc:ZDB-GENE-041010-21]	http://zfin.org/ZDB-GENE-041010-21	http://zfin.org/ZDB-GENE-041010-21	0.000264093	-0.425836	0.123	0.217	2
ENSDARG00000004785	cops2	COP9 signalosome subunit 2 [Source:ZFIN;Acc:ZDB-GENE-040625-15]	http://zfin.org/ZDB-GENE-040625-15	http://zfin.org/ZDB-GENE-040625-15	3.40498e-06	-0.425301	0.246	0.4	2
ENSDARG00000099849	ebf1a	early B-cell factor 1a [Source:ZFIN;Acc:ZDB-GENE-081028-51]	http://zfin.org/ZDB-GENE-081028-51	http://zfin.org/ZDB-GENE-081028-51	3.40653e-06	-0.425165	0.079	0.283	2
ENSDARG00000103994	ppiab	peptidylprolyl isomerase Ab (cyclophilin A) [Source:ZFIN;Acc:ZDB-GENE-030131-7459]	http://zfin.org/ZDB-GENE-030131-7459	http://zfin.org/ZDB-GENE-030131-7459	2.42544e-08	-0.424712	0.991	0.983	2
ENSDARG00000045776	cnbpa	CCHC-type zinc finger, nucleic acid binding protein a [Source:ZFIN;Acc:ZDB-GENE-030131-5045]	http://zfin.org/ZDB-GENE-030131-5045	http://zfin.org/ZDB-GENE-030131-5045	3.43753e-07	-0.424368	0.711	0.717	2
ENSDARG00000039162	rhebl1	Ras homolog enriched in brain like 1 [Source:ZFIN;Acc:ZDB-GENE-000510-1]	http://zfin.org/ZDB-GENE-000510-1	http://zfin.org/ZDB-GENE-000510-1	1.2573e-06	-0.423984	0.105	0.3	2
ENSDARG00000058824	mrpl4	mitochondrial ribosomal protein L4 [Source:ZFIN;Acc:ZDB-GENE-050522-388]	http://zfin.org/ZDB-GENE-050522-388	http://zfin.org/ZDB-GENE-050522-388	0.00011337	-0.423404	0.105	0.233	2
ENSDARG00000026448	med29	mediator complex subunit 29 [Source:ZFIN;Acc:ZDB-GENE-021217-1]	http://zfin.org/ZDB-GENE-021217-1	http://zfin.org/ZDB-GENE-021217-1	7.68332e-05	-0.42323	0.096	0.317	2
ENSDARG00000003035	hspa9	heat shock protein 9 [Source:ZFIN;Acc:ZDB-GENE-030828-12]	http://zfin.org/ZDB-GENE-030828-12	http://zfin.org/ZDB-GENE-030828-12	0.000309635	-0.423141	0.307	0.5	2
ENSDARG00000031587	flvcr1	feline leukemia virus subgroup C cellular receptor 1 [Source:ZFIN;Acc:ZDB-GENE-041014-359]	http://zfin.org/ZDB-GENE-041014-359	http://zfin.org/ZDB-GENE-041014-359	6.51678e-05	-0.422908	0.132	0.317	2
ENSDARG00000023290	fabp3	fatty acid binding protein 3, muscle and heart [Source:ZFIN;Acc:ZDB-GENE-020318-2]	http://zfin.org/ZDB-GENE-020318-2	http://zfin.org/ZDB-GENE-020318-2	2.37355e-05	-0.422767	0.596	0.65	2
ENSDARG00000044299	lmnb1	lamin B1 [Source:ZFIN;Acc:ZDB-GENE-020424-2]	http://zfin.org/ZDB-GENE-020424-2	http://zfin.org/ZDB-GENE-020424-2	2.55e-05	-0.422626	0.07	0.267	2
ENSDARG00000029248	fubp1	far upstream element (FUSE) binding protein 1 [Source:ZFIN;Acc:ZDB-GENE-040426-2159]	http://zfin.org/ZDB-GENE-040426-2159	http://zfin.org/ZDB-GENE-040426-2159	0.00103242	-0.421596	0.202	0.35	2
ENSDARG00000060150	psmd11a	proteasome 26S subunit, non-ATPase 11a [Source:ZFIN;Acc:ZDB-GENE-030131-2711]	http://zfin.org/ZDB-GENE-030131-2711	http://zfin.org/ZDB-GENE-030131-2711	4.74285e-05	-0.421313	0.132	0.433	2
ENSDARG00000078118	fam60al	family with sequence similarity 60, member A, like [Source:ZFIN;Acc:ZDB-GENE-031114-2]	http://zfin.org/ZDB-GENE-031114-2	http://zfin.org/ZDB-GENE-031114-2	0.000432978	-0.42038	0.026	0.15	2
ENSDARG00000007034	hnrpkl	heterogeneous nuclear ribonucleoprotein K, like [Source:ZFIN;Acc:ZDB-GENE-040426-1923]	http://zfin.org/ZDB-GENE-040426-1923	http://zfin.org/ZDB-GENE-040426-1923	1.08571e-06	-0.419718	0.307	0.4	2
ENSDARG00000024895	fam50a	family with sequence similarity 50, member A [Source:ZFIN;Acc:ZDB-GENE-050417-110]	http://zfin.org/ZDB-GENE-050417-110	http://zfin.org/ZDB-GENE-050417-110	4.84679e-05	-0.41966	0.175	0.35	2
ENSDARG00000080010	adh5	alcohol dehydrogenase 5 [Source:ZFIN;Acc:ZDB-GENE-011003-1]	http://zfin.org/ZDB-GENE-011003-1	http://zfin.org/ZDB-GENE-011003-1	3.32829e-05	-0.419642	0.14	0.383	2
ENSDARG00000101406	rplp2	ribosomal protein, large P2 [Source:ZFIN;Acc:ZDB-GENE-031018-2]	http://zfin.org/ZDB-GENE-031018-2	http://zfin.org/ZDB-GENE-031018-2	3.1134e-09	-0.418593	1	1	2
ENSDARG00000025615	prr15la	proline rich 15-like a [Source:ZFIN;Acc:ZDB-GENE-040801-218]	http://zfin.org/ZDB-GENE-040801-218	http://zfin.org/ZDB-GENE-040801-218	7.16486e-07	-0.417638	0.921	0.9	2
ENSDARG00000020015	mrps33	mitochondrial ribosomal protein S33 [Source:ZFIN;Acc:ZDB-GENE-040715-6]	http://zfin.org/ZDB-GENE-040715-6	http://zfin.org/ZDB-GENE-040715-6	9.58182e-07	-0.41729	0.237	0.367	2
ENSDARG00000013379	ppp6r3	protein phosphatase 6, regulatory subunit 3 [Source:ZFIN;Acc:ZDB-GENE-030131-3251]	http://zfin.org/ZDB-GENE-030131-3251	http://zfin.org/ZDB-GENE-030131-3251	0.00100254	-0.417	0.193	0.45	2
ENSDARG00000101047	rtcb	RNA 2',3'-cyclic phosphate and 5'-OH ligase [Source:ZFIN;Acc:ZDB-GENE-040426-2096]	http://zfin.org/ZDB-GENE-040426-2096	http://zfin.org/ZDB-GENE-040426-2096	0.000254717	-0.416051	0.026	0.233	2
ENSDARG00000097108	BX649442.2		http://zfin.org/	http://zfin.org/	0.00625897	-0.415445	0.316	0.483	2
ENSDARG00000010487	sae1	SUMO1 activating enzyme subunit 1 [Source:ZFIN;Acc:ZDB-GENE-040625-21]	http://zfin.org/ZDB-GENE-040625-21	http://zfin.org/ZDB-GENE-040625-21	3.85204e-05	-0.415147	0.061	0.2	2
ENSDARG00000045146	tomm22	translocase of outer mitochondrial membrane 22 homolog (yeast) [Source:ZFIN;Acc:ZDB-GENE-030131-9810]	http://zfin.org/ZDB-GENE-030131-9810	http://zfin.org/ZDB-GENE-030131-9810	2.02622e-05	-0.413856	0.456	0.55	2
ENSDARG00000027916	fntb	farnesyltransferase, CAAX box, beta [Source:ZFIN;Acc:ZDB-GENE-030131-2220]	http://zfin.org/ZDB-GENE-030131-2220	http://zfin.org/ZDB-GENE-030131-2220	0.0003815	-0.413455	0.246	0.333	2
ENSDARG00000030949	srprb	signal recognition particle receptor, B subunit [Source:ZFIN;Acc:ZDB-GENE-040718-311]	http://zfin.org/ZDB-GENE-040718-311	http://zfin.org/ZDB-GENE-040718-311	0.000167704	-0.413448	0.123	0.367	2
ENSDARG00000014898	ncbp2	nuclear cap binding protein subunit 2 [Source:ZFIN;Acc:ZDB-GENE-020419-31]	http://zfin.org/ZDB-GENE-020419-31	http://zfin.org/ZDB-GENE-020419-31	0.000371966	-0.4121	0.211	0.35	2
ENSDARG00000105293	srsf4	serine/arginine-rich splicing factor 4 [Source:ZFIN;Acc:ZDB-GENE-030131-591]	http://zfin.org/ZDB-GENE-030131-591	http://zfin.org/ZDB-GENE-030131-591	0.00249801	-0.411953	0.228	0.45	2
ENSDARG00000092693	tpt1	tumor protein, translationally-controlled 1 [Source:ZFIN;Acc:ZDB-GENE-990603-10]	http://zfin.org/ZDB-GENE-990603-10	http://zfin.org/ZDB-GENE-990603-10	9.59756e-07	-0.410805	0.974	0.95	2
ENSDARG00000028533	macf1a	microtubule-actin crosslinking factor 1a [Source:ZFIN;Acc:ZDB-GENE-030131-3606]	http://zfin.org/ZDB-GENE-030131-3606	http://zfin.org/ZDB-GENE-030131-3606	0.009209	-0.410599	0.193	0.367	2
ENSDARG00000037229	denr	density-regulated protein [Source:ZFIN;Acc:ZDB-GENE-040718-450]	http://zfin.org/ZDB-GENE-040718-450	http://zfin.org/ZDB-GENE-040718-450	2.18481e-08	-0.409703	0.272	0.417	2
ENSDARG00000069099	tmco1	transmembrane and coiled-coil domains 1 [Source:ZFIN;Acc:ZDB-GENE-050417-344]	http://zfin.org/ZDB-GENE-050417-344	http://zfin.org/ZDB-GENE-050417-344	6.19638e-06	-0.409605	0.36	0.5	2
ENSDARG00000018049	sf3b2	splicing factor 3b, subunit 2 [Source:ZFIN;Acc:ZDB-GENE-070928-1]	http://zfin.org/ZDB-GENE-070928-1	http://zfin.org/ZDB-GENE-070928-1	5.23927e-05	-0.409479	0.289	0.417	2
ENSDARG00000044545	zgc:77262	zgc:77262 [Source:ZFIN;Acc:ZDB-GENE-040426-1811]	http://zfin.org/ZDB-GENE-040426-1811	http://zfin.org/ZDB-GENE-040426-1811	0.00450615	-0.409175	0.132	0.317	2
ENSDARG00000037488	canx	calnexin [Source:ZFIN;Acc:ZDB-GENE-040426-2797]	http://zfin.org/ZDB-GENE-040426-2797	http://zfin.org/ZDB-GENE-040426-2797	1.24656e-06	-0.40827	0.404	0.483	2
ENSDARG00000018524	midn	midnolin [Source:ZFIN;Acc:ZDB-GENE-030131-2433]	http://zfin.org/ZDB-GENE-030131-2433	http://zfin.org/ZDB-GENE-030131-2433	0.000333775	-0.407165	0.184	0.25	2
ENSDARG00000070434	rhov	ras homolog family member V [Source:ZFIN;Acc:ZDB-GENE-031002-10]	http://zfin.org/ZDB-GENE-031002-10	http://zfin.org/ZDB-GENE-031002-10	1.822e-05	-0.406597	0.026	0.217	2
ENSDARG00000025977	blmh	bleomycin hydrolase [Source:ZFIN;Acc:ZDB-GENE-030131-8485]	http://zfin.org/ZDB-GENE-030131-8485	http://zfin.org/ZDB-GENE-030131-8485	0.000598354	-0.40623	0.14	0.35	2
ENSDARG00000070867	smx5	smx5 [Source:ZFIN;Acc:ZDB-GENE-000616-10]	http://zfin.org/ZDB-GENE-000616-10	http://zfin.org/ZDB-GENE-000616-10	1.86165e-07	-0.4058	0.649	0.633	2
ENSDARG00000025397	srsf3a	serine/arginine-rich splicing factor 3a [Source:ZFIN;Acc:ZDB-GENE-030616-631]	http://zfin.org/ZDB-GENE-030616-631	http://zfin.org/ZDB-GENE-030616-631	0.00206068	-0.405535	0.263	0.483	2
ENSDARG00000001210	arl14ep	ADP-ribosylation factor-like 14 effector protein [Source:ZFIN;Acc:ZDB-GENE-060825-216]	http://zfin.org/ZDB-GENE-060825-216	http://zfin.org/ZDB-GENE-060825-216	4.12277e-06	-0.405351	0.14	0.283	2
ENSDARG00000021948	tnc	tenascin C [Source:ZFIN;Acc:ZDB-GENE-980526-104]	http://zfin.org/ZDB-GENE-980526-104	http://zfin.org/ZDB-GENE-980526-104	6.58081e-05	-0.404705	0.026	0.183	2
ENSDARG00000002745	tdh	L-threonine dehydrogenase [Source:ZFIN;Acc:ZDB-GENE-040426-2379]	http://zfin.org/ZDB-GENE-040426-2379	http://zfin.org/ZDB-GENE-040426-2379	2.51955e-06	-0.404391	0.535	0.617	2
ENSDARG00000043631	bcas2	BCAS2, pre-mRNA processing factor [Source:ZFIN;Acc:ZDB-GENE-030408-5]	http://zfin.org/ZDB-GENE-030408-5	http://zfin.org/ZDB-GENE-030408-5	1.03541e-09	-0.404329	0.395	0.467	2
ENSDARG00000099194	CABZ01058261.1		http://zfin.org/	http://zfin.org/	0.00158013	-0.403931	0.018	0.15	2
ENSDARG00000102452	eif3ha	eukaryotic translation initiation factor 3, subunit H, a [Source:ZFIN;Acc:ZDB-GENE-040808-19]	http://zfin.org/ZDB-GENE-040808-19	http://zfin.org/ZDB-GENE-040808-19	0.000111426	-0.403665	0.561	0.65	2
ENSDARG00000069118	ppp2r5eb	protein phosphatase 2, regulatory subunit B', epsilon isoform b [Source:ZFIN;Acc:ZDB-GENE-030904-6]	http://zfin.org/ZDB-GENE-030904-6	http://zfin.org/ZDB-GENE-030904-6	6.68811e-06	-0.403333	0.342	0.483	2
ENSDARG00000093374	EPB41L2	si:ch73-18b11.1 [Source:ZFIN;Acc:ZDB-GENE-070912-332]	http://zfin.org/ZDB-GENE-070912-332	http://zfin.org/ZDB-GENE-070912-332	0.00253389	-0.401954	0.175	0.283	2
ENSDARG00000099943	mapre2	microtubule-associated protein, RP/EB family, member 2 [Source:ZFIN;Acc:ZDB-GENE-071004-41]	http://zfin.org/ZDB-GENE-071004-41	http://zfin.org/ZDB-GENE-071004-41	0.000112837	-0.401546	0.044	0.167	2
ENSDARG00000099663	cox5ab	cytochrome c oxidase subunit Vab [Source:ZFIN;Acc:ZDB-GENE-030131-5162]	http://zfin.org/ZDB-GENE-030131-5162	http://zfin.org/ZDB-GENE-030131-5162	0.000348905	-0.400943	0.781	0.833	2
ENSDARG00000045620	nansa	N-acetylneuraminic acid synthase a [Source:ZFIN;Acc:ZDB-GENE-030131-1500]	http://zfin.org/ZDB-GENE-030131-1500	http://zfin.org/ZDB-GENE-030131-1500	9.46813e-06	-0.400864	0.061	0.2	2
ENSDARG00000059070	gars	glycyl-tRNA synthetase [Source:ZFIN;Acc:ZDB-GENE-030131-9174]	http://zfin.org/ZDB-GENE-030131-9174	http://zfin.org/ZDB-GENE-030131-9174	1.73617e-05	-0.400317	0.096	0.283	2
ENSDARG00000044601	rtn4a	reticulon 4a [Source:ZFIN;Acc:ZDB-GENE-030710-1]	http://zfin.org/ZDB-GENE-030710-1	http://zfin.org/ZDB-GENE-030710-1	1.63497e-06	-0.39997	0.491	0.6	2
ENSDARG00000099709	rhoac	ras homolog gene family, member Ac [Source:ZFIN;Acc:ZDB-GENE-040426-2665]	http://zfin.org/ZDB-GENE-040426-2665	http://zfin.org/ZDB-GENE-040426-2665	0.00275984	-0.399594	0.237	0.467	2
ENSDARG00000093112	espnlb	espin-like b [Source:ZFIN;Acc:ZDB-GENE-070912-481]	http://zfin.org/ZDB-GENE-070912-481	http://zfin.org/ZDB-GENE-070912-481	6.25451e-05	-0.398895	0.009	0.217	2
ENSDARG00000016548	eif5b	eukaryotic translation initiation factor 5B [Source:ZFIN;Acc:ZDB-GENE-050208-20]	http://zfin.org/ZDB-GENE-050208-20	http://zfin.org/ZDB-GENE-050208-20	0.00109608	-0.398553	0.342	0.467	2
ENSDARG00000020077	nol10	nucleolar protein 10 [Source:ZFIN;Acc:ZDB-GENE-040426-764]	http://zfin.org/ZDB-GENE-040426-764	http://zfin.org/ZDB-GENE-040426-764	0.00123128	-0.398407	0.053	0.233	2
ENSDARG00000042252	eif4h	eukaryotic translation initiation factor 4h [Source:ZFIN;Acc:ZDB-GENE-010328-19]	http://zfin.org/ZDB-GENE-010328-19	http://zfin.org/ZDB-GENE-010328-19	2.06244e-06	-0.397823	0.36	0.5	2
ENSDARG00000098059	fkbp3	FK506 binding protein 3 [Source:ZFIN;Acc:ZDB-GENE-030616-419]	http://zfin.org/ZDB-GENE-030616-419	http://zfin.org/ZDB-GENE-030616-419	5.11612e-05	-0.396206	0.465	0.5	2
ENSDARG00000002353	tagapa	T-cell activation RhoGTPase activating protein a [Source:ZFIN;Acc:ZDB-GENE-040426-1877]	http://zfin.org/ZDB-GENE-040426-1877	http://zfin.org/ZDB-GENE-040426-1877	0.000132574	-0.395755	0.184	0.25	2
ENSDARG00000004452	tardbpl	TAR DNA binding protein, like [Source:ZFIN;Acc:ZDB-GENE-031030-1]	http://zfin.org/ZDB-GENE-031030-1	http://zfin.org/ZDB-GENE-031030-1	7.70576e-06	-0.395716	0.482	0.55	2
ENSDARG00000019941	sgta	small glutamine-rich tetratricopeptide repeat (TPR)-containing, alpha [Source:ZFIN;Acc:ZDB-GENE-030131-8811]	http://zfin.org/ZDB-GENE-030131-8811	http://zfin.org/ZDB-GENE-030131-8811	0.00589113	-0.395618	0.289	0.45	2
ENSDARG00000035608	pgam5	PGAM family member 5, serine/threonine protein phosphatase, mitochondrial [Source:ZFIN;Acc:ZDB-GENE-030131-683]	http://zfin.org/ZDB-GENE-030131-683	http://zfin.org/ZDB-GENE-030131-683	0.00135667	-0.395594	0.061	0.217	2
ENSDARG00000088318	ubap2a	ubiquitin associated protein 2a [Source:ZFIN;Acc:ZDB-GENE-070424-16]	http://zfin.org/ZDB-GENE-070424-16	http://zfin.org/ZDB-GENE-070424-16	0.000178942	-0.395417	0.14	0.3	2
ENSDARG00000105445	CR769769.2		http://zfin.org/	http://zfin.org/	0.000311631	-0.393867	0.114	0.3	2
ENSDARG00000101180	mcm7	minichromosome maintenance complex component 7 [Source:ZFIN;Acc:ZDB-GENE-020419-27]	http://zfin.org/ZDB-GENE-020419-27	http://zfin.org/ZDB-GENE-020419-27	0.0106812	-0.393449	0.061	0.167	2
ENSDARG00000045367	tuba1b	tubulin, alpha 1b [Source:ZFIN;Acc:ZDB-GENE-030822-1]	http://zfin.org/ZDB-GENE-030822-1	http://zfin.org/ZDB-GENE-030822-1	0.000130911	-0.393127	0.123	0.283	2
ENSDARG00000018393	kank2	KN motif and ankyrin repeat domains 2 [Source:ZFIN;Acc:ZDB-GENE-040724-121]	http://zfin.org/ZDB-GENE-040724-121	http://zfin.org/ZDB-GENE-040724-121	0.00013547	-0.392976	0.026	0.167	2
ENSDARG00000021924	hsp70.3	heat shock cognate 70-kd protein, tandem duplicate 3 [Source:ZFIN;Acc:ZDB-GENE-110713-1]	http://zfin.org/ZDB-GENE-110713-1	http://zfin.org/ZDB-GENE-110713-1	0.0190316	-0.392515	0.044	0.15	2
ENSDARG00000002988	tnnt2d	troponin T2d, cardiac [Source:ZFIN;Acc:ZDB-GENE-050626-97]	http://zfin.org/ZDB-GENE-050626-97	http://zfin.org/ZDB-GENE-050626-97	0.0066843	-0.391924	0.184	0.35	2
ENSDARG00000023220	selt2	selenoprotein T, 2 [Source:ZFIN;Acc:ZDB-GENE-030411-4]	http://zfin.org/ZDB-GENE-030411-4	http://zfin.org/ZDB-GENE-030411-4	0.000995486	-0.391757	0.307	0.45	2
ENSDARG00000056621	ctcf	CCCTC-binding factor (zinc finger protein) [Source:ZFIN;Acc:ZDB-GENE-040624-5]	http://zfin.org/ZDB-GENE-040624-5	http://zfin.org/ZDB-GENE-040624-5	0.0047366	-0.391263	0.061	0.233	2
ENSDARG00000097753	slirp	SRA stem-loop interacting RNA binding protein [Source:ZFIN;Acc:ZDB-GENE-030729-30]	http://zfin.org/ZDB-GENE-030729-30	http://zfin.org/ZDB-GENE-030729-30	0.00128155	-0.390988	0.421	0.567	2
ENSDARG00000091931	gpatch4	G patch domain containing 4 [Source:ZFIN;Acc:ZDB-GENE-041008-158]	http://zfin.org/ZDB-GENE-041008-158	http://zfin.org/ZDB-GENE-041008-158	0.00145697	-0.39075	0	0.117	2
ENSDARG00000012682	pfn2l	profilin 2 like [Source:ZFIN;Acc:ZDB-GENE-030131-34]	http://zfin.org/ZDB-GENE-030131-34	http://zfin.org/ZDB-GENE-030131-34	7.58007e-06	-0.390221	0.307	0.417	2
ENSDARG00000098911	zgc:153293	zgc:153293 [Source:ZFIN;Acc:ZDB-GENE-060825-315]	http://zfin.org/ZDB-GENE-060825-315	http://zfin.org/ZDB-GENE-060825-315	0.000409061	-0.390051	0.088	0.233	2
ENSDARG00000058094	ciarta	circadian associated repressor of transcription a [Source:ZFIN;Acc:ZDB-GENE-030131-7016]	http://zfin.org/ZDB-GENE-030131-7016	http://zfin.org/ZDB-GENE-030131-7016	0.000168435	-0.390042	0.491	0.583	2
ENSDARG00000089368	hopx	HOP homeobox [Source:ZFIN;Acc:ZDB-GENE-031016-2]	http://zfin.org/ZDB-GENE-031016-2	http://zfin.org/ZDB-GENE-031016-2	1.99866e-06	-0.389836	0.316	0.3	2
ENSDARG00000051888	ist1	increased sodium tolerance 1 homolog (yeast) [Source:ZFIN;Acc:ZDB-GENE-030131-179]	http://zfin.org/ZDB-GENE-030131-179	http://zfin.org/ZDB-GENE-030131-179	0.00158085	-0.389737	0.342	0.517	2
ENSDARG00000033138	lyrm2	LYR motif containing 2 [Source:ZFIN;Acc:ZDB-GENE-040914-27]	http://zfin.org/ZDB-GENE-040914-27	http://zfin.org/ZDB-GENE-040914-27	3.03791e-05	-0.389303	0.175	0.25	2
ENSDARG00000019897	gpat4	glycerol-3-phosphate acyltransferase 4 [Source:ZFIN;Acc:ZDB-GENE-060421-5102]	http://zfin.org/ZDB-GENE-060421-5102	http://zfin.org/ZDB-GENE-060421-5102	0.000630955	-0.388145	0.132	0.317	2
ENSDARG00000044820	cstf1	cleavage stimulation factor, 3' pre-RNA, subunit 1 [Source:ZFIN;Acc:ZDB-GENE-030131-2958]	http://zfin.org/ZDB-GENE-030131-2958	http://zfin.org/ZDB-GENE-030131-2958	5.13943e-06	-0.387888	0.175	0.317	2
ENSDARG00000086699	smim15	small integral membrane protein 15 [Source:ZFIN;Acc:ZDB-GENE-070410-48]	http://zfin.org/ZDB-GENE-070410-48	http://zfin.org/ZDB-GENE-070410-48	0.00134796	-0.387756	0.254	0.45	2
ENSDARG00000039913	tmem147	transmembrane protein 147 [Source:ZFIN;Acc:ZDB-GENE-040718-187]	http://zfin.org/ZDB-GENE-040718-187	http://zfin.org/ZDB-GENE-040718-187	0.000373773	-0.387477	0.149	0.383	2
ENSDARG00000019404	atp5d	ATP synthase, H+ transporting, mitochondrial F1 complex, delta subunit [Source:ZFIN;Acc:ZDB-GENE-030131-7649]	http://zfin.org/ZDB-GENE-030131-7649	http://zfin.org/ZDB-GENE-030131-7649	0.000381811	-0.386681	0.868	0.933	2
ENSDARG00000029133	tubgcp3	tubulin, gamma complex associated protein 3 [Source:ZFIN;Acc:ZDB-GENE-030616-538]	http://zfin.org/ZDB-GENE-030616-538	http://zfin.org/ZDB-GENE-030616-538	0.000453869	-0.386371	0.035	0.133	2
ENSDARG00000028148	pax2a	paired box 2a [Source:ZFIN;Acc:ZDB-GENE-990415-8]	http://zfin.org/ZDB-GENE-990415-8	http://zfin.org/ZDB-GENE-990415-8	0.0279283	-0.38619	0.211	0.383	2
ENSDARG00000004470	prkcsh	protein kinase C substrate 80K-H [Source:ZFIN;Acc:ZDB-GENE-040426-770]	http://zfin.org/ZDB-GENE-040426-770	http://zfin.org/ZDB-GENE-040426-770	0.000915265	-0.386134	0.386	0.517	2
ENSDARG00000017320	f11r.1	F11 receptor, tandem duplicate 1 [Source:ZFIN;Acc:ZDB-GENE-030131-2416]	http://zfin.org/ZDB-GENE-030131-2416	http://zfin.org/ZDB-GENE-030131-2416	7.68487e-06	-0.385946	0.833	0.817	2
ENSDARG00000101707	si:ch211-156b7.4	si:ch211-156b7.4 [Source:ZFIN;Acc:ZDB-GENE-141212-376]	http://zfin.org/ZDB-GENE-141212-376	http://zfin.org/ZDB-GENE-141212-376	0.000584357	-0.385872	0.07	0.233	2
ENSDARG00000037392	med19a	mediator complex subunit 19a [Source:ZFIN;Acc:ZDB-GENE-060929-232]	http://zfin.org/ZDB-GENE-060929-232	http://zfin.org/ZDB-GENE-060929-232	0.0113155	-0.385692	0.289	0.433	2
ENSDARG00000023852	lsm4	LSM4 homolog, U6 small nuclear RNA and mRNA degradation associated [Source:ZFIN;Acc:ZDB-GENE-040426-1652]	http://zfin.org/ZDB-GENE-040426-1652	http://zfin.org/ZDB-GENE-040426-1652	9.82202e-05	-0.38526	0.719	0.767	2
ENSDARG00000033182	arl4ab	ADP-ribosylation factor-like 4ab [Source:ZFIN;Acc:ZDB-GENE-030219-167]	http://zfin.org/ZDB-GENE-030219-167	http://zfin.org/ZDB-GENE-030219-167	1.3082e-08	-0.384024	0.272	0.3	2
ENSDARG00000008380	brd7	bromodomain containing 7 [Source:ZFIN;Acc:ZDB-GENE-040426-2687]	http://zfin.org/ZDB-GENE-040426-2687	http://zfin.org/ZDB-GENE-040426-2687	8.79356e-07	-0.383864	0.105	0.233	2
ENSDARG00000105036	arl6ip4	ADP-ribosylation factor-like 6 interacting protein 4 [Source:ZFIN;Acc:ZDB-GENE-050522-405]	http://zfin.org/ZDB-GENE-050522-405	http://zfin.org/ZDB-GENE-050522-405	0.00129961	-0.383777	0.149	0.267	2
ENSDARG00000042141	myo6b	myosin VIb [Source:ZFIN;Acc:ZDB-GENE-030318-3]	http://zfin.org/ZDB-GENE-030318-3	http://zfin.org/ZDB-GENE-030318-3	1.33276e-06	-0.383403	0.579	0.55	2
ENSDARG00000009346	caprin1a	cell cycle associated protein 1a [Source:ZFIN;Acc:ZDB-GENE-040801-226]	http://zfin.org/ZDB-GENE-040801-226	http://zfin.org/ZDB-GENE-040801-226	0.00488879	-0.382804	0.219	0.483	2
ENSDARG00000100822	mapk15	mitogen-activated protein kinase 15 [Source:ZFIN;Acc:ZDB-GENE-050522-307]	http://zfin.org/ZDB-GENE-050522-307	http://zfin.org/ZDB-GENE-050522-307	3.08497e-06	-0.382755	0.254	0.333	2
ENSDARG00000061145	gfod2	glucose-fructose oxidoreductase domain containing 2 [Source:ZFIN;Acc:ZDB-GENE-061103-64]	http://zfin.org/ZDB-GENE-061103-64	http://zfin.org/ZDB-GENE-061103-64	0.00418598	-0.382129	0.009	0.15	2
ENSDARG00000035427	surf6	surfeit 6 [Source:ZFIN;Acc:ZDB-GENE-040426-1333]	http://zfin.org/ZDB-GENE-040426-1333	http://zfin.org/ZDB-GENE-040426-1333	0.000395687	-0.381912	0.026	0.167	2
ENSDARG00000070553	rnmt	RNA (guanine-7-) methyltransferase [Source:ZFIN;Acc:ZDB-GENE-041008-25]	http://zfin.org/ZDB-GENE-041008-25	http://zfin.org/ZDB-GENE-041008-25	1.16156e-05	-0.381634	0.018	0.217	2
ENSDARG00000090788	cstf2	cleavage stimulation factor, 3' pre-RNA, subunit 2 [Source:ZFIN;Acc:ZDB-GENE-031118-2]	http://zfin.org/ZDB-GENE-031118-2	http://zfin.org/ZDB-GENE-031118-2	4.17011e-05	-0.381606	0.219	0.333	2
ENSDARG00000025889	usp14	ubiquitin specific peptidase 14 (tRNA-guanine transglycosylase) [Source:ZFIN;Acc:ZDB-GENE-030131-7676]	http://zfin.org/ZDB-GENE-030131-7676	http://zfin.org/ZDB-GENE-030131-7676	4.37933e-05	-0.380984	0.228	0.383	2
ENSDARG00000022768	gid8a	GID complex subunit 8 homolog a (S. cerevisiae) [Source:ZFIN;Acc:ZDB-GENE-040426-1669]	http://zfin.org/ZDB-GENE-040426-1669	http://zfin.org/ZDB-GENE-040426-1669	0.0030578	-0.380798	0.298	0.45	2
ENSDARG00000037503	thoc2	THO complex 2 [Source:ZFIN;Acc:ZDB-GENE-030616-54]	http://zfin.org/ZDB-GENE-030616-54	http://zfin.org/ZDB-GENE-030616-54	0.00289943	-0.380423	0.184	0.35	2
ENSDARG00000053544	hspa4l	heat shock protein 4 like [Source:ZFIN;Acc:ZDB-GENE-030131-2412]	http://zfin.org/ZDB-GENE-030131-2412	http://zfin.org/ZDB-GENE-030131-2412	0.00940725	-0.379542	0.193	0.4	2
ENSDARG00000090697	eif3ea	eukaryotic translation initiation factor 3, subunit E, a [Source:ZFIN;Acc:ZDB-GENE-030131-3827]	http://zfin.org/ZDB-GENE-030131-3827	http://zfin.org/ZDB-GENE-030131-3827	0.000205361	-0.378342	0.518	0.583	2
ENSDARG00000004280	seh1l	SEH1-like (S. cerevisiae) [Source:ZFIN;Acc:ZDB-GENE-030131-6689]	http://zfin.org/ZDB-GENE-030131-6689	http://zfin.org/ZDB-GENE-030131-6689	0.000469073	-0.377905	0.254	0.45	2
ENSDARG00000041391	tmed10	transmembrane p24 trafficking protein 10 [Source:ZFIN;Acc:ZDB-GENE-030131-4915]	http://zfin.org/ZDB-GENE-030131-4915	http://zfin.org/ZDB-GENE-030131-4915	0.000102459	-0.377724	0.614	0.7	2
ENSDARG00000015144	sh2d4bb	SH2 domain containing 4Bb [Source:ZFIN;Acc:ZDB-GENE-130531-42]	http://zfin.org/ZDB-GENE-130531-42	http://zfin.org/ZDB-GENE-130531-42	0.00562994	-0.377524	0.325	0.4	2
ENSDARG00000008936	sec11a	SEC11 homolog A, signal peptidase complex subunit [Source:ZFIN;Acc:ZDB-GENE-040718-227]	http://zfin.org/ZDB-GENE-040718-227	http://zfin.org/ZDB-GENE-040718-227	0.00911003	-0.377315	0.5	0.633	2
ENSDARG00000036721	tomm40l	translocase of outer mitochondrial membrane 40 homolog, like [Source:ZFIN;Acc:ZDB-GENE-040426-2319]	http://zfin.org/ZDB-GENE-040426-2319	http://zfin.org/ZDB-GENE-040426-2319	0.00947563	-0.377118	0.193	0.367	2
ENSDARG00000103415	PPP4R3B	protein phosphatase 4 regulatory subunit 3B [Source:HGNC Symbol;Acc:HGNC:29267]	http://zfin.org/	http://zfin.org/	0.000105246	-0.377079	0.175	0.3	2
ENSDARG00000005134	psmd11b	proteasome 26S subunit, non-ATPase 11b [Source:ZFIN;Acc:ZDB-GENE-030131-984]	http://zfin.org/ZDB-GENE-030131-984	http://zfin.org/ZDB-GENE-030131-984	0.00441806	-0.376263	0.228	0.433	2
ENSDARG00000100487	nploc4	NPL4 homolog, ubiquitin recognition factor [Source:ZFIN;Acc:ZDB-GENE-030131-5658]	http://zfin.org/ZDB-GENE-030131-5658	http://zfin.org/ZDB-GENE-030131-5658	0.00012951	-0.376088	0.123	0.217	2
ENSDARG00000025147	cd63	CD63 molecule [Source:ZFIN;Acc:ZDB-GENE-030131-180]	http://zfin.org/ZDB-GENE-030131-180	http://zfin.org/ZDB-GENE-030131-180	5.36136e-05	-0.375804	0.105	0.183	2
ENSDARG00000017067	chordc1b	cysteine and histidine-rich domain (CHORD) containing 1b [Source:ZFIN;Acc:ZDB-GENE-040426-1288]	http://zfin.org/ZDB-GENE-040426-1288	http://zfin.org/ZDB-GENE-040426-1288	0.000119983	-0.375204	0.237	0.367	2
ENSDARG00000100741	cdc20	cell division cycle 20 homolog [Source:ZFIN;Acc:ZDB-GENE-040426-2044]	http://zfin.org/ZDB-GENE-040426-2044	http://zfin.org/ZDB-GENE-040426-2044	0.0134501	-0.374393	0.026	0.133	2
ENSDARG00000095743	sox11b	SRY (sex determining region Y)-box 11b [Source:ZFIN;Acc:ZDB-GENE-980526-466]	http://zfin.org/ZDB-GENE-980526-466	http://zfin.org/ZDB-GENE-980526-466	0.000363196	-0.373406	0.07	0.133	2
ENSDARG00000026845	rhoaa	ras homolog gene family, member Aa [Source:ZFIN;Acc:ZDB-GENE-040426-2150]	http://zfin.org/ZDB-GENE-040426-2150	http://zfin.org/ZDB-GENE-040426-2150	0.00763098	-0.373171	0.386	0.533	2
ENSDARG00000041394	dnajb1b	DnaJ (Hsp40) homolog, subfamily B, member 1b [Source:ZFIN;Acc:ZDB-GENE-030131-5455]	http://zfin.org/ZDB-GENE-030131-5455	http://zfin.org/ZDB-GENE-030131-5455	0.00605148	-0.372894	0.061	0.183	2
ENSDARG00000022968	fxr1	fragile X mental retardation, autosomal homolog 1 [Source:ZFIN;Acc:ZDB-GENE-030131-5431]	http://zfin.org/ZDB-GENE-030131-5431	http://zfin.org/ZDB-GENE-030131-5431	0.000422615	-0.372577	0.079	0.283	2
ENSDARG00000005162	tpm3	tropomyosin 3 [Source:ZFIN;Acc:ZDB-GENE-030826-16]	http://zfin.org/ZDB-GENE-030826-16	http://zfin.org/ZDB-GENE-030826-16	1.10038e-06	-0.372502	0.123	0.267	2
ENSDARG00000004527	pin4	protein (peptidylprolyl cis/trans isomerase) NIMA-interacting, 4 (parvulin) [Source:ZFIN;Acc:ZDB-GENE-050522-117]	http://zfin.org/ZDB-GENE-050522-117	http://zfin.org/ZDB-GENE-050522-117	9.85149e-05	-0.37223	0.281	0.417	2
ENSDARG00000099241	ppp2cb	protein phosphatase 2, catalytic subunit, beta isozyme [Source:ZFIN;Acc:ZDB-GENE-040426-2487]	http://zfin.org/ZDB-GENE-040426-2487	http://zfin.org/ZDB-GENE-040426-2487	0.00198448	-0.372011	0.421	0.533	2
ENSDARG00000103824	hint1	histidine triad nucleotide binding protein 1 [Source:ZFIN;Acc:ZDB-GENE-040927-8]	http://zfin.org/ZDB-GENE-040927-8	http://zfin.org/ZDB-GENE-040927-8	0.00136162	-0.3716	0.333	0.417	2
ENSDARG00000076526	gar1	GAR1 homolog, ribonucleoprotein [Source:ZFIN;Acc:ZDB-GENE-040426-893]	http://zfin.org/ZDB-GENE-040426-893	http://zfin.org/ZDB-GENE-040426-893	9.23279e-07	-0.371509	0.079	0.267	2
ENSDARG00000046022	tmed7	transmembrane p24 trafficking protein 7 [Source:ZFIN;Acc:ZDB-GENE-040426-2570]	http://zfin.org/ZDB-GENE-040426-2570	http://zfin.org/ZDB-GENE-040426-2570	0.000392636	-0.371401	0.746	0.8	2
ENSDARG00000003058	fgfr1op	FGFR1 oncogene partner [Source:ZFIN;Acc:ZDB-GENE-090417-1]	http://zfin.org/ZDB-GENE-090417-1	http://zfin.org/ZDB-GENE-090417-1	1.11509e-05	-0.370663	0.298	0.383	2
ENSDARG00000040287	ywhabl	tyrosine 3-monooxygenase/tryptophan 5-monooxygenase activation protein, beta polypeptide like [Source:ZFIN;Acc:ZDB-GENE-030131-448]	http://zfin.org/ZDB-GENE-030131-448	http://zfin.org/ZDB-GENE-030131-448	4.8221e-09	-0.370351	0.851	0.733	2
ENSDARG00000076439	ppp4cb	protein phosphatase 4, catalytic subunit b [Source:ZFIN;Acc:ZDB-GENE-080219-32]	http://zfin.org/ZDB-GENE-080219-32	http://zfin.org/ZDB-GENE-080219-32	0.000562155	-0.369929	0.325	0.433	2
ENSDARG00000042864	rpl7l1	ribosomal protein L7-like 1 [Source:ZFIN;Acc:ZDB-GENE-030131-970]	http://zfin.org/ZDB-GENE-030131-970	http://zfin.org/ZDB-GENE-030131-970	5.287e-05	-0.369657	0.123	0.333	2
ENSDARG00000000069	dap	death-associated protein [Source:ZFIN;Acc:ZDB-GENE-000511-3]	http://zfin.org/ZDB-GENE-000511-3	http://zfin.org/ZDB-GENE-000511-3	1.06971e-07	-0.369603	0.272	0.317	2
ENSDARG00000023536	nnt	nicotinamide nucleotide transhydrogenase [Source:ZFIN;Acc:ZDB-GENE-040426-2592]	http://zfin.org/ZDB-GENE-040426-2592	http://zfin.org/ZDB-GENE-040426-2592	2.55466e-06	-0.369465	0.123	0.25	2
ENSDARG00000059298	spcs1	signal peptidase complex subunit 1 [Source:ZFIN;Acc:ZDB-GENE-050809-130]	http://zfin.org/ZDB-GENE-050809-130	http://zfin.org/ZDB-GENE-050809-130	5.74317e-06	-0.368407	0.772	0.733	2
ENSDARG00000102333	fcf1	FCF1 rRNA-processing protein [Source:ZFIN;Acc:ZDB-GENE-050417-67]	http://zfin.org/ZDB-GENE-050417-67	http://zfin.org/ZDB-GENE-050417-67	0.000670231	-0.368347	0.044	0.217	2
ENSDARG00000088290	foxj1b	forkhead box J1b [Source:ZFIN;Acc:ZDB-GENE-041212-76]	http://zfin.org/ZDB-GENE-041212-76	http://zfin.org/ZDB-GENE-041212-76	6.68561e-05	-0.366878	0.175	0.317	2
ENSDARG00000040443	polr2i	polymerase (RNA) II (DNA directed) polypeptide I [Source:ZFIN;Acc:ZDB-GENE-041010-106]	http://zfin.org/ZDB-GENE-041010-106	http://zfin.org/ZDB-GENE-041010-106	0.000338837	-0.3668	0.079	0.3	2
ENSDARG00000004956	zmat2	zinc finger, matrin-type 2 [Source:ZFIN;Acc:ZDB-GENE-030131-3197]	http://zfin.org/ZDB-GENE-030131-3197	http://zfin.org/ZDB-GENE-030131-3197	0.000312588	-0.366795	0.518	0.65	2
ENSDARG00000079438	pkp3b	plakophilin 3b [Source:ZFIN;Acc:ZDB-GENE-130530-870]	http://zfin.org/ZDB-GENE-130530-870	http://zfin.org/ZDB-GENE-130530-870	0.000242809	-0.366368	0.535	0.617	2
ENSDARG00000023003	ccdc12	coiled-coil domain containing 12 [Source:ZFIN;Acc:ZDB-GENE-040801-108]	http://zfin.org/ZDB-GENE-040801-108	http://zfin.org/ZDB-GENE-040801-108	0.00145884	-0.366279	0.368	0.533	2
ENSDARG00000058660	ilf3a	interleukin enhancer binding factor 3a [Source:ZFIN;Acc:ZDB-GENE-030131-3151]	http://zfin.org/ZDB-GENE-030131-3151	http://zfin.org/ZDB-GENE-030131-3151	6.92173e-07	-0.365926	0.228	0.267	2
ENSDARG00000013009	ubiad1	UbiA prenyltransferase domain containing 1 [Source:ZFIN;Acc:ZDB-GENE-030131-3205]	http://zfin.org/ZDB-GENE-030131-3205	http://zfin.org/ZDB-GENE-030131-3205	1.70693e-06	-0.36548	0.132	0.267	2
ENSDARG00000018914	hnrnpk	heterogeneous nuclear ribonucleoprotein K [Source:ZFIN;Acc:ZDB-GENE-040426-1926]	http://zfin.org/ZDB-GENE-040426-1926	http://zfin.org/ZDB-GENE-040426-1926	4.26552e-05	-0.365133	0.623	0.667	2
ENSDARG00000006399	ywhae1	tyrosine 3-monooxygenase/tryptophan 5-monooxygenase activation protein, epsilon polypeptide 1 [Source:ZFIN;Acc:ZDB-GENE-030131-779]	http://zfin.org/ZDB-GENE-030131-779	http://zfin.org/ZDB-GENE-030131-779	0.000307443	-0.365091	0.781	0.767	2
ENSDARG00000074852	myo15b	myosin XVB [Source:ZFIN;Acc:ZDB-GENE-030131-4797]	http://zfin.org/ZDB-GENE-030131-4797	http://zfin.org/ZDB-GENE-030131-4797	0.00248527	-0.36474	0.105	0.283	2
ENSDARG00000011564	sfpq	splicing factor proline/glutamine-rich [Source:ZFIN;Acc:ZDB-GENE-040426-2452]	http://zfin.org/ZDB-GENE-040426-2452	http://zfin.org/ZDB-GENE-040426-2452	3.25496e-05	-0.364256	0.289	0.35	2
ENSDARG00000032126	scg5	secretogranin V [Source:ZFIN;Acc:ZDB-GENE-040426-1687]	http://zfin.org/ZDB-GENE-040426-1687	http://zfin.org/ZDB-GENE-040426-1687	0.00613164	-0.363612	0.649	0.667	2
ENSDARG00000054010	scaf1	SR-related CTD-associated factor 1 [Source:ZFIN;Acc:ZDB-GENE-120215-214]	http://zfin.org/ZDB-GENE-120215-214	http://zfin.org/ZDB-GENE-120215-214	3.77552e-05	-0.362881	0.263	0.367	2
ENSDARG00000103027	clns1a	chloride channel, nucleotide-sensitive, 1A [Source:ZFIN;Acc:ZDB-GENE-990415-259]	http://zfin.org/ZDB-GENE-990415-259	http://zfin.org/ZDB-GENE-990415-259	4.18686e-05	-0.362851	0.044	0.2	2
ENSDARG00000024844	max	myc associated factor X [Source:ZFIN;Acc:ZDB-GENE-990415-152]	http://zfin.org/ZDB-GENE-990415-152	http://zfin.org/ZDB-GENE-990415-152	1.40469e-06	-0.362606	0.5	0.5	2
ENSDARG00000020893	slc25a22	solute carrier family 25 (mitochondrial carrier: glutamate), member 22 [Source:ZFIN;Acc:ZDB-GENE-040426-2745]	http://zfin.org/ZDB-GENE-040426-2745	http://zfin.org/ZDB-GENE-040426-2745	1.89402e-07	-0.36234	0.325	0.367	2
ENSDARG00000058370	ropn1l	rhophilin associated tail protein 1-like [Source:ZFIN;Acc:ZDB-GENE-040724-235]	http://zfin.org/ZDB-GENE-040724-235	http://zfin.org/ZDB-GENE-040724-235	0.002498	-0.362058	0.377	0.6	2
ENSDARG00000063917	mt-nd4	NADH dehydrogenase 4, mitochondrial [Source:ZFIN;Acc:ZDB-GENE-011205-10]	http://zfin.org/ZDB-GENE-011205-10	http://zfin.org/ZDB-GENE-011205-10	0.00105471	-0.362044	0.965	0.917	2
ENSDARG00000077037	txlna	taxilin alpha [Source:ZFIN;Acc:ZDB-GENE-030131-2900]	http://zfin.org/ZDB-GENE-030131-2900	http://zfin.org/ZDB-GENE-030131-2900	0.000900444	-0.36192	0.272	0.433	2
ENSDARG00000014013	lbr	lamin B receptor [Source:ZFIN;Acc:ZDB-GENE-030804-11]	http://zfin.org/ZDB-GENE-030804-11	http://zfin.org/ZDB-GENE-030804-11	0.0152592	-0.361821	0.263	0.433	2
ENSDARG00000038881	acaa2	acetyl-CoA acyltransferase 2 [Source:ZFIN;Acc:ZDB-GENE-040426-1996]	http://zfin.org/ZDB-GENE-040426-1996	http://zfin.org/ZDB-GENE-040426-1996	0.00117597	-0.361698	0.167	0.35	2
ENSDARG00000099279	ift27	intraflagellar transport 27 homolog (Chlamydomonas) [Source:ZFIN;Acc:ZDB-GENE-041212-9]	http://zfin.org/ZDB-GENE-041212-9	http://zfin.org/ZDB-GENE-041212-9	2.00281e-08	-0.361611	0.86	0.717	2
ENSDARG00000014159	mtdha	metadherin a [Source:ZFIN;Acc:ZDB-GENE-030616-615]	http://zfin.org/ZDB-GENE-030616-615	http://zfin.org/ZDB-GENE-030616-615	0.00096379	-0.36131	0.211	0.317	2
ENSDARG00000055124	ccnl1a	cyclin L1a [Source:ZFIN;Acc:ZDB-GENE-050419-206]	http://zfin.org/ZDB-GENE-050419-206	http://zfin.org/ZDB-GENE-050419-206	7.08832e-05	-0.36074	0.132	0.233	2
ENSDARG00000018698	carm1	coactivator-associated arginine methyltransferase 1 [Source:ZFIN;Acc:ZDB-GENE-040724-77]	http://zfin.org/ZDB-GENE-040724-77	http://zfin.org/ZDB-GENE-040724-77	1.54279e-07	-0.360242	0.132	0.267	2
ENSDARG00000028971	cpsf2	cleavage and polyadenylation specific factor 2 [Source:ZFIN;Acc:ZDB-GENE-040718-79]	http://zfin.org/ZDB-GENE-040718-79	http://zfin.org/ZDB-GENE-040718-79	0.00073487	-0.358349	0.044	0.2	2
ENSDARG00000002267	dcaf13	ddb1 and cul4 associated factor 13 [Source:ZFIN;Acc:ZDB-GENE-040426-703]	http://zfin.org/ZDB-GENE-040426-703	http://zfin.org/ZDB-GENE-040426-703	0.000137087	-0.358242	0.079	0.217	2
ENSDARG00000037410	med28	mediator complex subunit 28 [Source:ZFIN;Acc:ZDB-GENE-041121-4]	http://zfin.org/ZDB-GENE-041121-4	http://zfin.org/ZDB-GENE-041121-4	0.000171843	-0.358132	0.158	0.317	2
ENSDARG00000022712	stat3	signal transducer and activator of transcription 3 (acute-phase response factor) [Source:ZFIN;Acc:ZDB-GENE-980526-68]	http://zfin.org/ZDB-GENE-980526-68	http://zfin.org/ZDB-GENE-980526-68	0.00124692	-0.357968	0.053	0.233	2
ENSDARG00000052705	pkp1b	plakophilin 1b [Source:ZFIN;Acc:ZDB-GENE-030131-417]	http://zfin.org/ZDB-GENE-030131-417	http://zfin.org/ZDB-GENE-030131-417	0.00200564	-0.357846	0.298	0.383	2
ENSDARG00000039424	snrpb2	small nuclear ribonucleoprotein polypeptide B2 [Source:ZFIN;Acc:ZDB-GENE-060616-2]	http://zfin.org/ZDB-GENE-060616-2	http://zfin.org/ZDB-GENE-060616-2	0.00048831	-0.357724	0.114	0.333	2
ENSDARG00000104071	hikeshi	Hikeshi, heat shock protein nuclear import factor [Source:ZFIN;Acc:ZDB-GENE-050417-34]	http://zfin.org/ZDB-GENE-050417-34	http://zfin.org/ZDB-GENE-050417-34	1.81189e-07	-0.357709	0.289	0.367	2
ENSDARG00000014165	ssr3	signal sequence receptor, gamma [Source:ZFIN;Acc:ZDB-GENE-030131-9134]	http://zfin.org/ZDB-GENE-030131-9134	http://zfin.org/ZDB-GENE-030131-9134	3.07662e-05	-0.357346	0.518	0.6	2
ENSDARG00000015851	pnn	pinin, desmosome associated protein [Source:ZFIN;Acc:ZDB-GENE-060519-3]	http://zfin.org/ZDB-GENE-060519-3	http://zfin.org/ZDB-GENE-060519-3	1.33471e-06	-0.356904	0.333	0.433	2
ENSDARG00000015206	hnrnpua	heterogeneous nuclear ribonucleoprotein Ua [Source:ZFIN;Acc:ZDB-GENE-030131-3731]	http://zfin.org/ZDB-GENE-030131-3731	http://zfin.org/ZDB-GENE-030131-3731	0.0140259	-0.3569	0.132	0.267	2
ENSDARG00000010481	bzw1a	basic leucine zipper and W2 domains 1a [Source:ZFIN;Acc:ZDB-GENE-030131-3951]	http://zfin.org/ZDB-GENE-030131-3951	http://zfin.org/ZDB-GENE-030131-3951	2.9666e-06	-0.356816	0.711	0.6	2
ENSDARG00000042876	abracl	ABRA C-terminal like [Source:ZFIN;Acc:ZDB-GENE-030131-8594]	http://zfin.org/ZDB-GENE-030131-8594	http://zfin.org/ZDB-GENE-030131-8594	0.00706074	-0.356251	0.167	0.3	2
ENSDARG00000087193	prrg2	proline rich Gla (G-carboxyglutamic acid) 2 [Source:ZFIN;Acc:ZDB-GENE-130625-1]	http://zfin.org/ZDB-GENE-130625-1	http://zfin.org/ZDB-GENE-130625-1	0.000530126	-0.355784	0.105	0.217	2
ENSDARG00000011370	fyna	FYN proto-oncogene, Src family tyrosine kinase a [Source:ZFIN;Acc:ZDB-GENE-030903-5]	http://zfin.org/ZDB-GENE-030903-5	http://zfin.org/ZDB-GENE-030903-5	0.000278566	-0.355774	0.009	0.2	2
ENSDARG00000001940	dnajc1	DnaJ (Hsp40) homolog, subfamily C, member 1 [Source:ZFIN;Acc:ZDB-GENE-061103-529]	http://zfin.org/ZDB-GENE-061103-529	http://zfin.org/ZDB-GENE-061103-529	2.58158e-05	-0.355659	0.193	0.283	2
ENSDARG00000036894	AIMP1 (1 of many)	zgc:101853 [Source:ZFIN;Acc:ZDB-GENE-041212-13]	http://zfin.org/ZDB-GENE-041212-13	http://zfin.org/ZDB-GENE-041212-13	1.64896e-05	-0.355472	0	0.183	2
ENSDARG00000058206	si:ch211-153b23.5	si:ch211-153b23.5 [Source:ZFIN;Acc:ZDB-GENE-030131-9744]	http://zfin.org/ZDB-GENE-030131-9744	http://zfin.org/ZDB-GENE-030131-9744	2.93646e-08	-0.355343	1	0.983	2
ENSDARG00000039578	pa2g4a	proliferation-associated 2G4, a [Source:ZFIN;Acc:ZDB-GENE-030616-161]	http://zfin.org/ZDB-GENE-030616-161	http://zfin.org/ZDB-GENE-030616-161	1.45764e-05	-0.354971	0.167	0.3	2
ENSDARG00000041538	mrps28	mitochondrial ribosomal protein S28 [Source:ZFIN;Acc:ZDB-GENE-061110-52]	http://zfin.org/ZDB-GENE-061110-52	http://zfin.org/ZDB-GENE-061110-52	0.0192348	-0.354752	0.132	0.25	2
ENSDARG00000016253	ralab	v-ral simian leukemia viral oncogene homolog Ab (ras related) [Source:ZFIN;Acc:ZDB-GENE-041114-195]	http://zfin.org/ZDB-GENE-041114-195	http://zfin.org/ZDB-GENE-041114-195	8.27182e-06	-0.354029	0.088	0.2	2
ENSDARG00000070151	nfyc	nuclear transcription factor Y, gamma [Source:ZFIN;Acc:ZDB-GENE-030131-2165]	http://zfin.org/ZDB-GENE-030131-2165	http://zfin.org/ZDB-GENE-030131-2165	0.00407855	-0.353852	0.088	0.25	2
ENSDARG00000053716	zgc:153990	zgc:153990 [Source:ZFIN;Acc:ZDB-GENE-061013-144]	http://zfin.org/ZDB-GENE-061013-144	http://zfin.org/ZDB-GENE-061013-144	3.36021e-05	-0.353527	0.079	0.3	2
ENSDARG00000039213	prpf38a	pre-mRNA processing factor 38A [Source:ZFIN;Acc:ZDB-GENE-040801-225]	http://zfin.org/ZDB-GENE-040801-225	http://zfin.org/ZDB-GENE-040801-225	2.73945e-05	-0.353357	0.088	0.25	2
ENSDARG00000079497	zgc:110340	zgc:110340 [Source:ZFIN;Acc:ZDB-GENE-050320-36]	http://zfin.org/ZDB-GENE-050320-36	http://zfin.org/ZDB-GENE-050320-36	0.139237	-0.353228	0.5	0.567	2
ENSDARG00000025858	zgc:56525	zgc:56525 [Source:ZFIN;Acc:ZDB-GENE-040426-1060]	http://zfin.org/ZDB-GENE-040426-1060	http://zfin.org/ZDB-GENE-040426-1060	3.61869e-06	-0.353076	0.561	0.617	2
ENSDARG00000071573	lsm5	LSM5 homolog, U6 small nuclear RNA and mRNA degradation associated [Source:ZFIN;Acc:ZDB-GENE-070822-23]	http://zfin.org/ZDB-GENE-070822-23	http://zfin.org/ZDB-GENE-070822-23	8.26168e-08	-0.352708	0.544	0.567	2
ENSDARG00000068582	rnf44	ring finger protein 44 [Source:ZFIN;Acc:ZDB-GENE-060929-604]	http://zfin.org/ZDB-GENE-060929-604	http://zfin.org/ZDB-GENE-060929-604	0.0171009	-0.352493	0.175	0.35	2
ENSDARG00000006859	nkain1	Na+/K+ transporting ATPase interacting 1 [Source:ZFIN;Acc:ZDB-GENE-040426-1472]	http://zfin.org/ZDB-GENE-040426-1472	http://zfin.org/ZDB-GENE-040426-1472	1.34186e-06	-0.352402	0.114	0.283	2
ENSDARG00000017397	smarcc1a	SWI/SNF related, matrix associated, actin dependent regulator of chromatin, subfamily c, member 1a [Source:ZFIN;Acc:ZDB-GENE-080514-3]	http://zfin.org/ZDB-GENE-080514-3	http://zfin.org/ZDB-GENE-080514-3	0.012283	-0.352381	0.193	0.3	2
ENSDARG00000058467	prpf40a	PRP40 pre-mRNA processing factor 40 homolog A [Source:ZFIN;Acc:ZDB-GENE-030131-274]	http://zfin.org/ZDB-GENE-030131-274	http://zfin.org/ZDB-GENE-030131-274	0.00550561	-0.352377	0.228	0.35	2
ENSDARG00000099653	CABZ01113954.1		http://zfin.org/	http://zfin.org/	0.0112675	-0.352095	0.096	0.267	2
ENSDARG00000024651	snrpa1	small nuclear ribonucleoprotein polypeptide A' [Source:ZFIN;Acc:ZDB-GENE-041114-82]	http://zfin.org/ZDB-GENE-041114-82	http://zfin.org/ZDB-GENE-041114-82	0.000431278	-0.352061	0.158	0.267	2
ENSDARG00000023330	anp32b	acidic (leucine-rich) nuclear phosphoprotein 32 family, member B [Source:ZFIN;Acc:ZDB-GENE-030131-719]	http://zfin.org/ZDB-GENE-030131-719	http://zfin.org/ZDB-GENE-030131-719	0.001346	-0.351472	0.316	0.433	2
ENSDARG00000013078	ywhaba	tyrosine 3-monooxygenase/tryptophan 5-monooxygenase activation protein, beta polypeptide a [Source:ZFIN;Acc:ZDB-GENE-030131-6583]	http://zfin.org/ZDB-GENE-030131-6583	http://zfin.org/ZDB-GENE-030131-6583	0.000201719	-0.351394	0.798	0.85	2
ENSDARG00000063899	mt-nd2	NADH dehydrogenase 2, mitochondrial [Source:ZFIN;Acc:ZDB-GENE-011205-8]	http://zfin.org/ZDB-GENE-011205-8	http://zfin.org/ZDB-GENE-011205-8	0.00223037	-0.351319	0.982	1	2
ENSDARG00000102822	pam16	presequence translocase-associated motor 16 homolog (S. cerevisiae) [Source:ZFIN;Acc:ZDB-GENE-040426-1776]	http://zfin.org/ZDB-GENE-040426-1776	http://zfin.org/ZDB-GENE-040426-1776	9.20126e-06	-0.350497	0.237	0.333	2
ENSDARG00000056186	eif5a2	eukaryotic translation initiation factor 5A2 [Source:ZFIN;Acc:ZDB-GENE-040426-2405]	http://zfin.org/ZDB-GENE-040426-2405	http://zfin.org/ZDB-GENE-040426-2405	1.67359e-06	-0.350338	0.658	0.567	2
ENSDARG00000039669	TSTA3 (1 of many)	zgc:100864 [Source:ZFIN;Acc:ZDB-GENE-040801-35]	http://zfin.org/ZDB-GENE-040801-35	http://zfin.org/ZDB-GENE-040801-35	0.00284848	-0.348819	0.246	0.367	2
ENSDARG00000019530	hdgfrp2	hepatoma-derived growth factor-related protein 2 [Source:ZFIN;Acc:ZDB-GENE-040426-2104]	http://zfin.org/ZDB-GENE-040426-2104	http://zfin.org/ZDB-GENE-040426-2104	9.10558e-05	-0.34797	0.149	0.317	2
ENSDARG00000078917	zgc:195245	zgc:195245 [Source:ZFIN;Acc:ZDB-GENE-081022-200]	http://zfin.org/ZDB-GENE-081022-200	http://zfin.org/ZDB-GENE-081022-200	0.00322832	-0.347697	0.053	0.15	2
ENSDARG00000091631	si:ch211-197h24.6	si:ch211-197h24.6 [Source:ZFIN;Acc:ZDB-GENE-030131-1361]	http://zfin.org/ZDB-GENE-030131-1361	http://zfin.org/ZDB-GENE-030131-1361	0.0160921	-0.346904	0.088	0.25	2
ENSDARG00000059128	uqcrh	ubiquinol-cytochrome c reductase hinge protein [Source:ZFIN;Acc:ZDB-GENE-051030-93]	http://zfin.org/ZDB-GENE-051030-93	http://zfin.org/ZDB-GENE-051030-93	1.33652e-05	-0.3467	0.86	0.817	2
ENSDARG00000005122	atp2a2b	ATPase, Ca++ transporting, cardiac muscle, slow twitch 2b [Source:ZFIN;Acc:ZDB-GENE-030131-867]	http://zfin.org/ZDB-GENE-030131-867	http://zfin.org/ZDB-GENE-030131-867	0.00247708	-0.346347	0.246	0.383	2
ENSDARG00000030932	fgf10a	fibroblast growth factor 10a [Source:ZFIN;Acc:ZDB-GENE-030715-1]	http://zfin.org/ZDB-GENE-030715-1	http://zfin.org/ZDB-GENE-030715-1	0.000563212	-0.346321	0.5	0.467	2
ENSDARG00000020711	rrm2	ribonucleotide reductase M2 polypeptide [Source:ZFIN;Acc:ZDB-GENE-990415-25]	http://zfin.org/ZDB-GENE-990415-25	http://zfin.org/ZDB-GENE-990415-25	0.00186214	-0.345954	0.035	0.117	2
ENSDARG00000043484	ube2d2	ubiquitin-conjugating enzyme E2D 2 (UBC4/5 homolog, yeast) [Source:ZFIN;Acc:ZDB-GENE-120312-1]	http://zfin.org/ZDB-GENE-120312-1	http://zfin.org/ZDB-GENE-120312-1	4.95896e-08	-0.345923	0.711	0.683	2
ENSDARG00000043485	si:ch211-22i13.2	si:ch211-22i13.2 [Source:ZFIN;Acc:ZDB-GENE-041014-143]	http://zfin.org/ZDB-GENE-041014-143	http://zfin.org/ZDB-GENE-041014-143	0.00302362	-0.345423	0.272	0.4	2
ENSDARG00000032129	gtf2f1	general transcription factor IIF, polypeptide 1 [Source:ZFIN;Acc:ZDB-GENE-030131-4557]	http://zfin.org/ZDB-GENE-030131-4557	http://zfin.org/ZDB-GENE-030131-4557	0.00981884	-0.345236	0.211	0.383	2
ENSDARG00000011921	txnl1	thioredoxin-like 1 [Source:ZFIN;Acc:ZDB-GENE-040426-701]	http://zfin.org/ZDB-GENE-040426-701	http://zfin.org/ZDB-GENE-040426-701	5.76381e-05	-0.345077	0.307	0.4	2
ENSDARG00000059043	ntf3	neurotrophin 3 [Source:ZFIN;Acc:ZDB-GENE-031118-66]	http://zfin.org/ZDB-GENE-031118-66	http://zfin.org/ZDB-GENE-031118-66	0.00232094	-0.345007	0.018	0.15	2
ENSDARG00000074490	casc4	cancer susceptibility candidate 4 [Source:ZFIN;Acc:ZDB-GENE-091130-1]	http://zfin.org/ZDB-GENE-091130-1	http://zfin.org/ZDB-GENE-091130-1	0.00254316	-0.344852	0.14	0.183	2
ENSDARG00000020761	arrdc2	arrestin domain containing 2 [Source:ZFIN;Acc:ZDB-GENE-030131-7146]	http://zfin.org/ZDB-GENE-030131-7146	http://zfin.org/ZDB-GENE-030131-7146	5.41027e-05	-0.344723	0.053	0.15	2
ENSDARG00000031434	rcor1	REST corepressor 1 [Source:ZFIN;Acc:ZDB-GENE-050506-79]	http://zfin.org/ZDB-GENE-050506-79	http://zfin.org/ZDB-GENE-050506-79	0.000530504	-0.344592	0.184	0.367	2
ENSDARG00000039887	c1qbp	complement component 1, q subcomponent binding protein [Source:ZFIN;Acc:ZDB-GENE-050417-408]	http://zfin.org/ZDB-GENE-050417-408	http://zfin.org/ZDB-GENE-050417-408	6.24794e-06	-0.344537	0.14	0.283	2
ENSDARG00000012505	u2af2a	U2 small nuclear RNA auxiliary factor 2a [Source:ZFIN;Acc:ZDB-GENE-050706-131]	http://zfin.org/ZDB-GENE-050706-131	http://zfin.org/ZDB-GENE-050706-131	0.00169019	-0.344313	0.219	0.367	2
ENSDARG00000091234	si:ch73-335l21.4	si:ch73-335l21.4 [Source:ZFIN;Acc:ZDB-GENE-160728-105]	http://zfin.org/ZDB-GENE-160728-105	http://zfin.org/ZDB-GENE-160728-105	0.000245162	-0.344128	0.605	0.45	2
ENSDARG00000023190	kpna4	karyopherin alpha 4 (importin alpha 3) [Source:ZFIN;Acc:ZDB-GENE-030131-5584]	http://zfin.org/ZDB-GENE-030131-5584	http://zfin.org/ZDB-GENE-030131-5584	1.03915e-05	-0.344049	0.272	0.383	2
ENSDARG00000001898	manea	mannosidase, endo-alpha [Source:ZFIN;Acc:ZDB-GENE-040912-87]	http://zfin.org/ZDB-GENE-040912-87	http://zfin.org/ZDB-GENE-040912-87	1.69717e-06	-0.343775	0.219	0.333	2
ENSDARG00000018397	hpca	hippocalcin [Source:ZFIN;Acc:ZDB-GENE-040426-1683]	http://zfin.org/ZDB-GENE-040426-1683	http://zfin.org/ZDB-GENE-040426-1683	0.0146022	-0.342941	0.211	0.383	2
ENSDARG00000037559	uba1	ubiquitin-like modifier activating enzyme 1 [Source:ZFIN;Acc:ZDB-GENE-040426-2009]	http://zfin.org/ZDB-GENE-040426-2009	http://zfin.org/ZDB-GENE-040426-2009	0.000115398	-0.342684	0.386	0.417	2
ENSDARG00000038695	elavl1	ELAV like RNA binding protein 1 [Source:ZFIN;Acc:ZDB-GENE-990415-245]	http://zfin.org/ZDB-GENE-990415-245	http://zfin.org/ZDB-GENE-990415-245	0.00750756	-0.342647	0.333	0.5	2
ENSDARG00000102798	mcm2	minichromosome maintenance complex component 2 [Source:ZFIN;Acc:ZDB-GENE-020419-24]	http://zfin.org/ZDB-GENE-020419-24	http://zfin.org/ZDB-GENE-020419-24	0.0019178	-0.341949	0.026	0.15	2
ENSDARG00000079097	tanc2a	tetratricopeptide repeat, ankyrin repeat and coiled-coil containing 2a [Source:ZFIN;Acc:ZDB-GENE-060130-180]	http://zfin.org/ZDB-GENE-060130-180	http://zfin.org/ZDB-GENE-060130-180	0.0262498	-0.341846	0.149	0.333	2
ENSDARG00000054746	uggt1	UDP-glucose glycoprotein glucosyltransferase 1 [Source:ZFIN;Acc:ZDB-GENE-061103-619]	http://zfin.org/ZDB-GENE-061103-619	http://zfin.org/ZDB-GENE-061103-619	0.0531801	-0.341781	0.061	0.2	2
ENSDARG00000011247	rnpc3	RNA-binding region (RNP1, RRM) containing 3 [Source:ZFIN;Acc:ZDB-GENE-060312-35]	http://zfin.org/ZDB-GENE-060312-35	http://zfin.org/ZDB-GENE-060312-35	0.00679335	-0.341449	0.105	0.2	2
ENSDARG00000043555	tmem30ab	transmembrane protein 30Ab [Source:ZFIN;Acc:ZDB-GENE-030131-5884]	http://zfin.org/ZDB-GENE-030131-5884	http://zfin.org/ZDB-GENE-030131-5884	0.00135443	-0.341338	0.219	0.4	2
ENSDARG00000059654	eif3ba	eukaryotic translation initiation factor 3, subunit Ba [Source:ZFIN;Acc:ZDB-GENE-030131-2748]	http://zfin.org/ZDB-GENE-030131-2748	http://zfin.org/ZDB-GENE-030131-2748	0.000162703	-0.340785	0.588	0.617	2
ENSDARG00000037867	atp5j2	ATP synthase, H+ transporting, mitochondrial Fo complex, subunit F2 [Source:ZFIN;Acc:ZDB-GENE-050309-87]	http://zfin.org/ZDB-GENE-050309-87	http://zfin.org/ZDB-GENE-050309-87	3.73537e-05	-0.340607	0.991	1	2
ENSDARG00000069289	gabpa	GA binding protein transcription factor, alpha subunit [Source:ZFIN;Acc:ZDB-GENE-011010-2]	http://zfin.org/ZDB-GENE-011010-2	http://zfin.org/ZDB-GENE-011010-2	0.00670001	-0.340559	0.088	0.183	2
ENSDARG00000034785	dachb	dachshund b [Source:ZFIN;Acc:ZDB-GENE-020402-4]	http://zfin.org/ZDB-GENE-020402-4	http://zfin.org/ZDB-GENE-020402-4	0.010601	-0.340468	0.325	0.433	2
ENSDARG00000093612	si:dkey-92i17.2	si:dkey-92i17.2 [Source:ZFIN;Acc:ZDB-GENE-030131-6759]	http://zfin.org/ZDB-GENE-030131-6759	http://zfin.org/ZDB-GENE-030131-6759	0.00497798	-0.340359	0.009	0.133	2
ENSDARG00000105412	si:ch211-276i12.11	si:ch211-276i12.11 [Source:ZFIN;Acc:ZDB-GENE-160628-5]	http://zfin.org/ZDB-GENE-160628-5	http://zfin.org/ZDB-GENE-160628-5	0.000221351	-0.340166	0.114	0.25	2
ENSDARG00000037108	pfdn6	prefoldin subunit 6 [Source:ZFIN;Acc:ZDB-GENE-040426-1589]	http://zfin.org/ZDB-GENE-040426-1589	http://zfin.org/ZDB-GENE-040426-1589	0.0112631	-0.340048	0.316	0.433	2
ENSDARG00000003517	impa1	inositol(myo)-1(or 4)-monophosphatase 1 [Source:ZFIN;Acc:ZDB-GENE-040718-245]	http://zfin.org/ZDB-GENE-040718-245	http://zfin.org/ZDB-GENE-040718-245	0.00032199	-0.339708	0.211	0.367	2
ENSDARG00000099039	pcbp2	poly(rC) binding protein 2 [Source:ZFIN;Acc:ZDB-GENE-030131-563]	http://zfin.org/ZDB-GENE-030131-563	http://zfin.org/ZDB-GENE-030131-563	9.9024e-05	-0.339592	0.737	0.717	2
ENSDARG00000035598	coro1ca	coronin, actin binding protein, 1Ca [Source:ZFIN;Acc:ZDB-GENE-030114-6]	http://zfin.org/ZDB-GENE-030114-6	http://zfin.org/ZDB-GENE-030114-6	0.00129311	-0.339534	0.026	0.167	2
ENSDARG00000056235	smndc1	survival motor neuron domain containing 1 [Source:ZFIN;Acc:ZDB-GENE-030131-614]	http://zfin.org/ZDB-GENE-030131-614	http://zfin.org/ZDB-GENE-030131-614	1.751e-05	-0.339319	0.553	0.583	2
ENSDARG00000103893	srsf2b	serine/arginine-rich splicing factor 2b [Source:ZFIN;Acc:ZDB-GENE-030131-2420]	http://zfin.org/ZDB-GENE-030131-2420	http://zfin.org/ZDB-GENE-030131-2420	1.02543e-09	-0.338861	0.228	0.283	2
ENSDARG00000002344	tubb4b	tubulin, beta 4B class IVb [Source:ZFIN;Acc:ZDB-GENE-030131-8625]	http://zfin.org/ZDB-GENE-030131-8625	http://zfin.org/ZDB-GENE-030131-8625	4.14497e-06	-0.338606	0.965	0.9	2
ENSDARG00000037895	ramp2	receptor (G protein-coupled) activity modifying protein 2 [Source:ZFIN;Acc:ZDB-GENE-080204-79]	http://zfin.org/ZDB-GENE-080204-79	http://zfin.org/ZDB-GENE-080204-79	0.000607769	-0.338603	0.009	0.183	2
ENSDARG00000069142	aars	alanyl-tRNA synthetase [Source:ZFIN;Acc:ZDB-GENE-030131-3663]	http://zfin.org/ZDB-GENE-030131-3663	http://zfin.org/ZDB-GENE-030131-3663	0.00454782	-0.338595	0.132	0.283	2
ENSDARG00000021455	strbp	spermatid perinuclear RNA binding protein [Source:ZFIN;Acc:ZDB-GENE-030729-18]	http://zfin.org/ZDB-GENE-030729-18	http://zfin.org/ZDB-GENE-030729-18	0.00129458	-0.338116	0.316	0.483	2
ENSDARG00000058203	smc1al	structural maintenance of chromosomes 1A, like [Source:ZFIN;Acc:ZDB-GENE-040426-57]	http://zfin.org/ZDB-GENE-040426-57	http://zfin.org/ZDB-GENE-040426-57	9.98514e-07	-0.337626	0.43	0.383	2
ENSDARG00000006527	brd3a	bromodomain containing 3a [Source:ZFIN;Acc:ZDB-GENE-030131-6141]	http://zfin.org/ZDB-GENE-030131-6141	http://zfin.org/ZDB-GENE-030131-6141	0.000331892	-0.337537	0.079	0.133	2
ENSDARG00000021973	st13	suppression of tumorigenicity 13 (colon carcinoma) (Hsp70 interacting protein) [Source:ZFIN;Acc:ZDB-GENE-030131-5395]	http://zfin.org/ZDB-GENE-030131-5395	http://zfin.org/ZDB-GENE-030131-5395	3.12796e-06	-0.337478	0.404	0.45	2
ENSDARG00000025340	tusc2b	tumor suppressor candidate 2b [Source:ZFIN;Acc:ZDB-GENE-040718-99]	http://zfin.org/ZDB-GENE-040718-99	http://zfin.org/ZDB-GENE-040718-99	3.00105e-05	-0.337345	0.158	0.283	2
ENSDARG00000068886	mrpl14	mitochondrial ribosomal protein L14 [Source:ZFIN;Acc:ZDB-GENE-040426-1066]	http://zfin.org/ZDB-GENE-040426-1066	http://zfin.org/ZDB-GENE-040426-1066	0.00383996	-0.33671	0.254	0.4	2
ENSDARG00000095185	si:ch211-274p24.2	si:ch211-274p24.2 [Source:ZFIN;Acc:ZDB-GENE-050309-265]	http://zfin.org/ZDB-GENE-050309-265	http://zfin.org/ZDB-GENE-050309-265	0.0375724	-0.336343	0.298	0.383	2
ENSDARG00000100789	plgrkt	plasminogen receptor, C-terminal lysine transmembrane protein [Source:ZFIN;Acc:ZDB-GENE-050809-125]	http://zfin.org/ZDB-GENE-050809-125	http://zfin.org/ZDB-GENE-050809-125	0.00373207	-0.336316	0.114	0.267	2
ENSDARG00000070917	kitlga	kit ligand a [Source:ZFIN;Acc:ZDB-GENE-070424-1]	http://zfin.org/ZDB-GENE-070424-1	http://zfin.org/ZDB-GENE-070424-1	0.000609533	-0.335962	0.123	0.3	2
ENSDARG00000036754	hmgn3	high mobility group nucleosomal binding domain 3 [Source:ZFIN;Acc:ZDB-GENE-041114-180]	http://zfin.org/ZDB-GENE-041114-180	http://zfin.org/ZDB-GENE-041114-180	0.0034412	-0.335927	0.491	0.567	2
ENSDARG00000044090	zmpste24	zinc metallopeptidase, STE24 homolog [Source:ZFIN;Acc:ZDB-GENE-030131-6312]	http://zfin.org/ZDB-GENE-030131-6312	http://zfin.org/ZDB-GENE-030131-6312	7.95423e-05	-0.335873	0.202	0.35	2
ENSDARG00000015392	dhx15	DEAH (Asp-Glu-Ala-His) box helicase 15 [Source:ZFIN;Acc:ZDB-GENE-030131-650]	http://zfin.org/ZDB-GENE-030131-650	http://zfin.org/ZDB-GENE-030131-650	6.8769e-07	-0.335043	0.289	0.45	2
ENSDARG00000043713	asf1bb	anti-silencing function 1Bb histone chaperone [Source:ZFIN;Acc:ZDB-GENE-040426-2594]	http://zfin.org/ZDB-GENE-040426-2594	http://zfin.org/ZDB-GENE-040426-2594	1.00546e-05	-0.334838	0.193	0.283	2
ENSDARG00000070913	sox2	SRY (sex determining region Y)-box 2 [Source:ZFIN;Acc:ZDB-GENE-030909-1]	http://zfin.org/ZDB-GENE-030909-1	http://zfin.org/ZDB-GENE-030909-1	0.00295171	-0.334415	0.088	0.217	2
ENSDARG00000045549	bik	BCL2-interacting killer (apoptosis-inducing) [Source:ZFIN;Acc:ZDB-GENE-041210-181]	http://zfin.org/ZDB-GENE-041210-181	http://zfin.org/ZDB-GENE-041210-181	0.00132631	-0.334262	0.132	0.233	2
ENSDARG00000001244	srrm1	serine/arginine repetitive matrix 1 [Source:ZFIN;Acc:ZDB-GENE-040426-2789]	http://zfin.org/ZDB-GENE-040426-2789	http://zfin.org/ZDB-GENE-040426-2789	0.021683	-0.334234	0.211	0.4	2
ENSDARG00000006003	mycla	MYCL proto-oncogene, bHLH transcription factor a [Source:ZFIN;Acc:ZDB-GENE-040426-2439]	http://zfin.org/ZDB-GENE-040426-2439	http://zfin.org/ZDB-GENE-040426-2439	0.00247125	-0.334083	0.018	0.15	2
ENSDARG00000039719	mrps26	mitochondrial ribosomal protein S26 [Source:ZFIN;Acc:ZDB-GENE-040718-115]	http://zfin.org/ZDB-GENE-040718-115	http://zfin.org/ZDB-GENE-040718-115	0.0113682	-0.333877	0.184	0.367	2
ENSDARG00000079434	si:ch211-208h7.4	si:ch211-208h7.4 [Source:ZFIN;Acc:ZDB-GENE-030131-6110]	http://zfin.org/ZDB-GENE-030131-6110	http://zfin.org/ZDB-GENE-030131-6110	0.000295308	-0.33383	0.228	0.3	2
ENSDARG00000093492	CR677617.1		http://zfin.org/	http://zfin.org/	0.0199364	-0.332472	0.272	0.367	2
ENSDARG00000070084	phf10	PHD finger protein 10 [Source:ZFIN;Acc:ZDB-GENE-040426-1573]	http://zfin.org/ZDB-GENE-040426-1573	http://zfin.org/ZDB-GENE-040426-1573	0.0021502	-0.33213	0.07	0.233	2
ENSDARG00000003193	rassf7b	Ras association (RalGDS/AF-6) domain family (N-terminal) member 7b [Source:ZFIN;Acc:ZDB-GENE-030429-1]	http://zfin.org/ZDB-GENE-030429-1	http://zfin.org/ZDB-GENE-030429-1	0.00121308	-0.331818	0.219	0.317	2
ENSDARG00000079012	CBFA2T3	CBFA2/RUNX1 translocation partner 3 [Source:HGNC Symbol;Acc:HGNC:1537]	http://zfin.org/	http://zfin.org/	0.000393961	-0.331802	0.061	0.183	2
ENSDARG00000067717	tomm7	translocase of outer mitochondrial membrane 7 homolog (yeast) [Source:ZFIN;Acc:ZDB-GENE-060825-115]	http://zfin.org/ZDB-GENE-060825-115	http://zfin.org/ZDB-GENE-060825-115	6.31964e-06	-0.331568	0.456	0.483	2
ENSDARG00000034633	emc9	ER membrane protein complex subunit 9 [Source:ZFIN;Acc:ZDB-GENE-040426-693]	http://zfin.org/ZDB-GENE-040426-693	http://zfin.org/ZDB-GENE-040426-693	4.30042e-05	-0.331066	0.377	0.467	2
ENSDARG00000012325	zgc:110269	zgc:110269 [Source:ZFIN;Acc:ZDB-GENE-050417-81]	http://zfin.org/ZDB-GENE-050417-81	http://zfin.org/ZDB-GENE-050417-81	0.000969435	-0.330818	0.149	0.3	2
ENSDARG00000015088	dnajb11	DnaJ (Hsp40) homolog, subfamily B, member 11 [Source:ZFIN;Acc:ZDB-GENE-031113-9]	http://zfin.org/ZDB-GENE-031113-9	http://zfin.org/ZDB-GENE-031113-9	1.26716e-05	-0.329827	0.412	0.467	2
ENSDARG00000062002	adnpa	activity-dependent neuroprotector homeobox a [Source:ZFIN;Acc:ZDB-GENE-061215-112]	http://zfin.org/ZDB-GENE-061215-112	http://zfin.org/ZDB-GENE-061215-112	0.000377405	-0.3298	0.114	0.217	2
ENSDARG00000058306	prpf18	PRP18 pre-mRNA processing factor 18 homolog (yeast) [Source:ZFIN;Acc:ZDB-GENE-040704-45]	http://zfin.org/ZDB-GENE-040704-45	http://zfin.org/ZDB-GENE-040704-45	0.00044691	-0.329659	0.053	0.2	2
ENSDARG00000057983	svopl	SVOP-like [Source:ZFIN;Acc:ZDB-GENE-041114-109]	http://zfin.org/ZDB-GENE-041114-109	http://zfin.org/ZDB-GENE-041114-109	5.7755e-07	-0.329331	0.377	0.367	2
ENSDARG00000063341	si:ch211-284b7.3	si:ch211-284b7.3 [Source:ZFIN;Acc:ZDB-GENE-061207-34]	http://zfin.org/ZDB-GENE-061207-34	http://zfin.org/ZDB-GENE-061207-34	0.0224292	-0.329253	0.263	0.467	2
ENSDARG00000103799	kars	lysyl-tRNA synthetase [Source:ZFIN;Acc:ZDB-GENE-021115-8]	http://zfin.org/ZDB-GENE-021115-8	http://zfin.org/ZDB-GENE-021115-8	0.00020795	-0.329226	0.254	0.367	2
ENSDARG00000100129	brd3b	bromodomain containing 3b [Source:ZFIN;Acc:ZDB-GENE-030131-5316]	http://zfin.org/ZDB-GENE-030131-5316	http://zfin.org/ZDB-GENE-030131-5316	1.23904e-05	-0.329192	0.114	0.25	2
ENSDARG00000007219	actn1	actinin, alpha 1 [Source:ZFIN;Acc:ZDB-GENE-081113-4]	http://zfin.org/ZDB-GENE-081113-4	http://zfin.org/ZDB-GENE-081113-4	0.00124604	-0.329169	0.044	0.25	2
ENSDARG00000067996	csk	c-src tyrosine kinase [Source:ZFIN;Acc:ZDB-GENE-061103-493]	http://zfin.org/ZDB-GENE-061103-493	http://zfin.org/ZDB-GENE-061103-493	0.00176918	-0.329109	0.158	0.267	2
ENSDARG00000095897	atp5e	ATP synthase, H+ transporting, mitochondrial F1 complex, epsilon subunit [Source:ZFIN;Acc:ZDB-GENE-110411-22]	http://zfin.org/ZDB-GENE-110411-22	http://zfin.org/ZDB-GENE-110411-22	2.36993e-06	-0.328392	1	0.967	2
ENSDARG00000071468	mrpl54	mitochondrial ribosomal protein L54 [Source:ZFIN;Acc:ZDB-GENE-050208-381]	http://zfin.org/ZDB-GENE-050208-381	http://zfin.org/ZDB-GENE-050208-381	0.0021783	-0.328289	0.351	0.483	2
ENSDARG00000101894	stk10	serine/threonine kinase 10 [Source:ZFIN;Acc:ZDB-GENE-040426-1136]	http://zfin.org/ZDB-GENE-040426-1136	http://zfin.org/ZDB-GENE-040426-1136	0.0258302	-0.32817	0.096	0.267	2
ENSDARG00000103464	pggt1b	protein geranylgeranyltransferase type I, beta subunit [Source:ZFIN;Acc:ZDB-GENE-050913-85]	http://zfin.org/ZDB-GENE-050913-85	http://zfin.org/ZDB-GENE-050913-85	0.000455761	-0.328136	0.149	0.283	2
ENSDARG00000058818	rbm38	RNA binding motif protein 38 [Source:ZFIN;Acc:ZDB-GENE-030131-5923]	http://zfin.org/ZDB-GENE-030131-5923	http://zfin.org/ZDB-GENE-030131-5923	0.000900575	-0.328007	0.237	0.317	2
ENSDARG00000093382	uqcc3	ubiquinol-cytochrome c reductase complex assembly factor 3 [Source:ZFIN;Acc:ZDB-GENE-030131-8451]	http://zfin.org/ZDB-GENE-030131-8451	http://zfin.org/ZDB-GENE-030131-8451	0.000478174	-0.32797	0.509	0.533	2
ENSDARG00000015628	psmd10	proteasome 26S subunit, non-ATPase 10 [Source:ZFIN;Acc:ZDB-GENE-050112-1]	http://zfin.org/ZDB-GENE-050112-1	http://zfin.org/ZDB-GENE-050112-1	0.00172869	-0.32762	0.14	0.283	2
ENSDARG00000020607	emc3	ER membrane protein complex subunit 3 [Source:ZFIN;Acc:ZDB-GENE-040426-2904]	http://zfin.org/ZDB-GENE-040426-2904	http://zfin.org/ZDB-GENE-040426-2904	0.00462919	-0.32748	0.211	0.417	2
ENSDARG00000056649	htatsf1	HIV-1 Tat specific factor 1 [Source:ZFIN;Acc:ZDB-GENE-040426-1578]	http://zfin.org/ZDB-GENE-040426-1578	http://zfin.org/ZDB-GENE-040426-1578	6.59152e-05	-0.326561	0.167	0.317	2
ENSDARG00000030583	foxk2	forkhead box K2 [Source:ZFIN;Acc:ZDB-GENE-030131-2861]	http://zfin.org/ZDB-GENE-030131-2861	http://zfin.org/ZDB-GENE-030131-2861	1.86313e-05	-0.326306	0.079	0.133	2
ENSDARG00000043732	cops4	COP9 constitutive photomorphogenic homolog subunit 4 (Arabidopsis) [Source:ZFIN;Acc:ZDB-GENE-030131-4317]	http://zfin.org/ZDB-GENE-030131-4317	http://zfin.org/ZDB-GENE-030131-4317	1.11147e-05	-0.326263	0.623	0.617	2
ENSDARG00000015239	prpf19	pre-mRNA processing factor 19 [Source:ZFIN;Acc:ZDB-GENE-030131-263]	http://zfin.org/ZDB-GENE-030131-263	http://zfin.org/ZDB-GENE-030131-263	0.000108724	-0.325789	0.096	0.217	2
ENSDARG00000038576	ube2d1b	ubiquitin-conjugating enzyme E2D 1b [Source:ZFIN;Acc:ZDB-GENE-030131-2735]	http://zfin.org/ZDB-GENE-030131-2735	http://zfin.org/ZDB-GENE-030131-2735	6.16272e-06	-0.325689	0.693	0.667	2
ENSDARG00000098432	paf1	PAF1 homolog, Paf1/RNA polymerase II complex component [Source:ZFIN;Acc:ZDB-GENE-050506-101]	http://zfin.org/ZDB-GENE-050506-101	http://zfin.org/ZDB-GENE-050506-101	0.000186564	-0.325515	0.018	0.167	2
ENSDARG00000037017	ube4b	ubiquitination factor E4B, UFD2 homolog (S. cerevisiae) [Source:ZFIN;Acc:ZDB-GENE-020205-1]	http://zfin.org/ZDB-GENE-020205-1	http://zfin.org/ZDB-GENE-020205-1	0.000180699	-0.325394	0.061	0.183	2
ENSDARG00000054807	sec13	SEC13 homolog, nuclear pore and COPII coat complex component [Source:ZFIN;Acc:ZDB-GENE-040426-2649]	http://zfin.org/ZDB-GENE-040426-2649	http://zfin.org/ZDB-GENE-040426-2649	0.00331547	-0.324789	0.123	0.267	2
ENSDARG00000069065	btg3	B-cell translocation gene 3 [Source:ZFIN;Acc:ZDB-GENE-031113-19]	http://zfin.org/ZDB-GENE-031113-19	http://zfin.org/ZDB-GENE-031113-19	9.65812e-07	-0.324196	0.316	0.35	2
ENSDARG00000071224	si:ch211-133n4.4	si:ch211-133n4.4 [Source:ZFIN;Acc:ZDB-GENE-030131-898]	http://zfin.org/ZDB-GENE-030131-898	http://zfin.org/ZDB-GENE-030131-898	0.0787576	-0.324193	0.053	0.167	2
ENSDARG00000104773	junbb	jun B proto-oncogene b [Source:ZFIN;Acc:ZDB-GENE-040426-2666]	http://zfin.org/ZDB-GENE-040426-2666	http://zfin.org/ZDB-GENE-040426-2666	0.000137503	-0.323783	0.877	0.733	2
ENSDARG00000054155	pcna	proliferating cell nuclear antigen [Source:ZFIN;Acc:ZDB-GENE-000210-8]	http://zfin.org/ZDB-GENE-000210-8	http://zfin.org/ZDB-GENE-000210-8	0.0208122	-0.323658	0.167	0.217	2
ENSDARG00000019362	ptbp1a	polypyrimidine tract binding protein 1a [Source:ZFIN;Acc:ZDB-GENE-050522-492]	http://zfin.org/ZDB-GENE-050522-492	http://zfin.org/ZDB-GENE-050522-492	0.0013183	-0.323542	0.079	0.2	2
ENSDARG00000040864	si:dkey-286j15.1	si:dkey-286j15.1 [Source:ZFIN;Acc:ZDB-GENE-060503-447]	http://zfin.org/ZDB-GENE-060503-447	http://zfin.org/ZDB-GENE-060503-447	0.00776913	-0.322832	0.061	0.183	2
ENSDARG00000074771	crfb17	cytokine receptor family member B17 [Source:ZFIN;Acc:ZDB-GENE-081022-158]	http://zfin.org/ZDB-GENE-081022-158	http://zfin.org/ZDB-GENE-081022-158	0.020715	-0.322443	0.211	0.283	2
ENSDARG00000043781	PSMB10	zgc:92791 [Source:ZFIN;Acc:ZDB-GENE-040718-278]	http://zfin.org/ZDB-GENE-040718-278	http://zfin.org/ZDB-GENE-040718-278	0.00173414	-0.322	0.307	0.35	2
ENSDARG00000013931	eif3m	eukaryotic translation initiation factor 3, subunit M [Source:ZFIN;Acc:ZDB-GENE-040426-2643]	http://zfin.org/ZDB-GENE-040426-2643	http://zfin.org/ZDB-GENE-040426-2643	2.12842e-06	-0.321823	0.737	0.667	2
ENSDARG00000059866	cactin	cactin [Source:ZFIN;Acc:ZDB-GENE-060503-322]	http://zfin.org/ZDB-GENE-060503-322	http://zfin.org/ZDB-GENE-060503-322	0.00282317	-0.321533	0.026	0.133	2
ENSDARG00000004948	bccip	BRCA2 and CDKN1A interacting protein [Source:ZFIN;Acc:ZDB-GENE-050320-39]	http://zfin.org/ZDB-GENE-050320-39	http://zfin.org/ZDB-GENE-050320-39	5.6459e-05	-0.321363	0.281	0.35	2
ENSDARG00000102978	eif4a3	eukaryotic translation initiation factor 4A3 [Source:ZFIN;Acc:ZDB-GENE-040426-915]	http://zfin.org/ZDB-GENE-040426-915	http://zfin.org/ZDB-GENE-040426-915	0.00369199	-0.319809	0.518	0.583	2
ENSDARG00000056152	fam3c	family with sequence similarity 3, member C [Source:ZFIN;Acc:ZDB-GENE-030131-6137]	http://zfin.org/ZDB-GENE-030131-6137	http://zfin.org/ZDB-GENE-030131-6137	0.00226713	-0.319249	0.456	0.55	2
ENSDARG00000063672	TULP3	tubby like protein 3 [Source:HGNC Symbol;Acc:HGNC:12425]	http://zfin.org/	http://zfin.org/	0.00158911	-0.318847	0.158	0.267	2
ENSDARG00000003531	tcea1	transcription elongation factor A (SII), 1 [Source:ZFIN;Acc:ZDB-GENE-030131-8049]	http://zfin.org/ZDB-GENE-030131-8049	http://zfin.org/ZDB-GENE-030131-8049	0.00169963	-0.318435	0.325	0.433	2
ENSDARG00000091683	cnrip1a	cannabinoid receptor interacting protein 1a [Source:ZFIN;Acc:ZDB-GENE-040801-126]	http://zfin.org/ZDB-GENE-040801-126	http://zfin.org/ZDB-GENE-040801-126	0.00461725	-0.317853	0.254	0.35	2
ENSDARG00000026072	pdcd5	programmed cell death 5 [Source:ZFIN;Acc:ZDB-GENE-040426-980]	http://zfin.org/ZDB-GENE-040426-980	http://zfin.org/ZDB-GENE-040426-980	1.47486e-05	-0.317765	0.351	0.433	2
ENSDARG00000034424	atp1b2b	ATPase, Na+/K+ transporting, beta 2b polypeptide [Source:ZFIN;Acc:ZDB-GENE-010718-1]	http://zfin.org/ZDB-GENE-010718-1	http://zfin.org/ZDB-GENE-010718-1	0.000282418	-0.317597	0.825	0.783	2
ENSDARG00000071566	ppp1cab	protein phosphatase 1, catalytic subunit, alpha isozyme b [Source:ZFIN;Acc:ZDB-GENE-030131-5512]	http://zfin.org/ZDB-GENE-030131-5512	http://zfin.org/ZDB-GENE-030131-5512	0.00507127	-0.317272	0.219	0.367	2
ENSDARG00000014313	atp5j	ATP synthase, H+ transporting, mitochondrial Fo complex, subunit F6 [Source:ZFIN;Acc:ZDB-GENE-040426-2534]	http://zfin.org/ZDB-GENE-040426-2534	http://zfin.org/ZDB-GENE-040426-2534	0.00120282	-0.317192	0.956	0.917	2
ENSDARG00000031261	sap30bp	SAP30 binding protein [Source:ZFIN;Acc:ZDB-GENE-030131-457]	http://zfin.org/ZDB-GENE-030131-457	http://zfin.org/ZDB-GENE-030131-457	0.00305637	-0.316574	0.211	0.333	2
ENSDARG00000087443	ptp4a2a	protein tyrosine phosphatase type IVA, member 2a [Source:ZFIN;Acc:ZDB-GENE-040930-1]	http://zfin.org/ZDB-GENE-040930-1	http://zfin.org/ZDB-GENE-040930-1	0.0300612	-0.316563	0.272	0.417	2
ENSDARG00000025332	rbm28	RNA binding motif protein 28 [Source:ZFIN;Acc:ZDB-GENE-040426-960]	http://zfin.org/ZDB-GENE-040426-960	http://zfin.org/ZDB-GENE-040426-960	0.00518357	-0.3164	0.132	0.283	2
ENSDARG00000101332	uba2	ubiquitin-like modifier activating enzyme 2 [Source:ZFIN;Acc:ZDB-GENE-040426-2681]	http://zfin.org/ZDB-GENE-040426-2681	http://zfin.org/ZDB-GENE-040426-2681	0.0312208	-0.315847	0.061	0.167	2
ENSDARG00000075831	slc7a8a	solute carrier family 7 (amino acid transporter light chain, L system), member 8a [Source:ZFIN;Acc:ZDB-GENE-121120-2]	http://zfin.org/ZDB-GENE-121120-2	http://zfin.org/ZDB-GENE-121120-2	1.65136e-07	-0.315549	0.114	0.133	2
ENSDARG00000059075	nip7	NIP7, nucleolar pre-rRNA processing protein [Source:ZFIN;Acc:ZDB-GENE-050522-256]	http://zfin.org/ZDB-GENE-050522-256	http://zfin.org/ZDB-GENE-050522-256	7.98298e-05	-0.315285	0.026	0.2	2
ENSDARG00000104782	oaz1b	ornithine decarboxylase antizyme 1b [Source:ZFIN;Acc:ZDB-GENE-020731-5]	http://zfin.org/ZDB-GENE-020731-5	http://zfin.org/ZDB-GENE-020731-5	2.11954e-06	-0.315056	0.956	0.883	2
ENSDARG00000056903	mrpl13	mitochondrial ribosomal protein L13 [Source:ZFIN;Acc:ZDB-GENE-050522-167]	http://zfin.org/ZDB-GENE-050522-167	http://zfin.org/ZDB-GENE-050522-167	2.59385e-05	-0.314794	0.281	0.333	2
ENSDARG00000061100	nars	asparaginyl-tRNA synthetase [Source:ZFIN;Acc:ZDB-GENE-030131-1016]	http://zfin.org/ZDB-GENE-030131-1016	http://zfin.org/ZDB-GENE-030131-1016	0.0200248	-0.314312	0.202	0.3	2
ENSDARG00000023958	rnf181	ring finger protein 181 [Source:ZFIN;Acc:ZDB-GENE-040426-1024]	http://zfin.org/ZDB-GENE-040426-1024	http://zfin.org/ZDB-GENE-040426-1024	0.0353946	-0.314153	0.158	0.333	2
ENSDARG00000057912	eif1axb	eukaryotic translation initiation factor 1A, X-linked, b [Source:ZFIN;Acc:ZDB-GENE-030131-1319]	http://zfin.org/ZDB-GENE-030131-1319	http://zfin.org/ZDB-GENE-030131-1319	0.000525568	-0.313756	0.781	0.75	2
ENSDARG00000076966	pagr1	PAXIP1 associated glutamate-rich protein 1 [Source:ZFIN;Acc:ZDB-GENE-030131-4801]	http://zfin.org/ZDB-GENE-030131-4801	http://zfin.org/ZDB-GENE-030131-4801	2.52051e-05	-0.31306	0.105	0.233	2
ENSDARG00000009253	zgc:56576	zgc:56576 [Source:ZFIN;Acc:ZDB-GENE-040426-1082]	http://zfin.org/ZDB-GENE-040426-1082	http://zfin.org/ZDB-GENE-040426-1082	0.00010352	-0.312703	0.132	0.333	2
ENSDARG00000101357	CT737210.1		http://zfin.org/	http://zfin.org/	0.0229136	-0.312622	0.018	0.133	2
ENSDARG00000074572	zgc:56304	zgc:56304 [Source:ZFIN;Acc:ZDB-GENE-040426-2698]	http://zfin.org/ZDB-GENE-040426-2698	http://zfin.org/ZDB-GENE-040426-2698	7.54582e-05	-0.312056	0.518	0.55	2
ENSDARG00000027649	cpsf3	cleavage and polyadenylation specific factor 3 [Source:ZFIN;Acc:ZDB-GENE-030131-3275]	http://zfin.org/ZDB-GENE-030131-3275	http://zfin.org/ZDB-GENE-030131-3275	0.00179799	-0.311999	0.167	0.283	2
ENSDARG00000063895	mt-nd1	NADH dehydrogenase 1, mitochondrial [Source:ZFIN;Acc:ZDB-GENE-011205-7]	http://zfin.org/ZDB-GENE-011205-7	http://zfin.org/ZDB-GENE-011205-7	8.61366e-07	-0.311862	1	0.883	2
ENSDARG00000027141	ube2l3b	ubiquitin-conjugating enzyme E2L 3b [Source:ZFIN;Acc:ZDB-GENE-030131-662]	http://zfin.org/ZDB-GENE-030131-662	http://zfin.org/ZDB-GENE-030131-662	0.00168578	-0.311856	0.544	0.617	2
ENSDARG00000010194	eif4bb	eukaryotic translation initiation factor 4Bb [Source:ZFIN;Acc:ZDB-GENE-030131-8563]	http://zfin.org/ZDB-GENE-030131-8563	http://zfin.org/ZDB-GENE-030131-8563	0.014367	-0.311132	0.228	0.383	2
ENSDARG00000014915	ndufab1b	NADH dehydrogenase (ubiquinone) 1, alpha/beta subcomplex, 1b [Source:ZFIN;Acc:ZDB-GENE-030131-4437]	http://zfin.org/ZDB-GENE-030131-4437	http://zfin.org/ZDB-GENE-030131-4437	0.000463849	-0.311001	0.754	0.717	2
ENSDARG00000092360	si:ch211-51h9.6	si:ch211-51h9.6 [Source:ZFIN;Acc:ZDB-GENE-081104-234]	http://zfin.org/ZDB-GENE-081104-234	http://zfin.org/ZDB-GENE-081104-234	1.52831e-05	-0.310502	0.079	0.183	2
ENSDARG00000092856	si:ch211-210c8.7	si:ch211-210c8.7 [Source:ZFIN;Acc:ZDB-GENE-090313-81]	http://zfin.org/ZDB-GENE-090313-81	http://zfin.org/ZDB-GENE-090313-81	0.000238226	-0.31034	0.026	0.15	2
ENSDARG00000056531	nutf2	nuclear transport factor 2 [Source:ZFIN;Acc:ZDB-GENE-041010-77]	http://zfin.org/ZDB-GENE-041010-77	http://zfin.org/ZDB-GENE-041010-77	0.0168521	-0.310334	0.105	0.25	2
ENSDARG00000057529	itpa	inosine triphosphatase (nucleoside triphosphate pyrophosphatase) [Source:ZFIN;Acc:ZDB-GENE-070705-218]	http://zfin.org/ZDB-GENE-070705-218	http://zfin.org/ZDB-GENE-070705-218	0.000475784	-0.30996	0.096	0.3	2
ENSDARG00000042534	rsrc2	arginine/serine-rich coiled-coil 2 [Source:ZFIN;Acc:ZDB-GENE-040426-2457]	http://zfin.org/ZDB-GENE-040426-2457	http://zfin.org/ZDB-GENE-040426-2457	0.00399872	-0.309772	0.246	0.3	2
ENSDARG00000079783	isg20	interferon stimulated exonuclease gene [Source:ZFIN;Acc:ZDB-GENE-100422-17]	http://zfin.org/ZDB-GENE-100422-17	http://zfin.org/ZDB-GENE-100422-17	5.05316e-06	-0.309578	0.079	0.217	2
ENSDARG00000103472	nedd8l	neural precursor cell expressed, developmentally down-regulated 8, like [Source:ZFIN;Acc:ZDB-GENE-040718-295]	http://zfin.org/ZDB-GENE-040718-295	http://zfin.org/ZDB-GENE-040718-295	7.99038e-07	-0.309432	0.14	0.3	2
ENSDARG00000014963	triap1	TP53 regulated inhibitor of apoptosis 1 [Source:ZFIN;Acc:ZDB-GENE-050417-161]	http://zfin.org/ZDB-GENE-050417-161	http://zfin.org/ZDB-GENE-050417-161	0.0126459	-0.309362	0.07	0.233	2
ENSDARG00000094673	rhoab	ras homolog gene family, member Ab [Source:ZFIN;Acc:ZDB-GENE-040322-2]	http://zfin.org/ZDB-GENE-040322-2	http://zfin.org/ZDB-GENE-040322-2	0.0541633	-0.308621	0.158	0.233	2
ENSDARG00000103553	sf3b3	splicing factor 3b, subunit 3 [Source:ZFIN;Acc:ZDB-GENE-040426-2901]	http://zfin.org/ZDB-GENE-040426-2901	http://zfin.org/ZDB-GENE-040426-2901	0.001877	-0.308522	0.053	0.133	2
ENSDARG00000013095	gclc	glutamate-cysteine ligase, catalytic subunit [Source:ZFIN;Acc:ZDB-GENE-030131-5056]	http://zfin.org/ZDB-GENE-030131-5056	http://zfin.org/ZDB-GENE-030131-5056	0.00207916	-0.308338	0.325	0.45	2
ENSDARG00000005318	stam2	signal transducing adaptor molecule (SH3 domain and ITAM motif) 2 [Source:ZFIN;Acc:ZDB-GENE-041114-64]	http://zfin.org/ZDB-GENE-041114-64	http://zfin.org/ZDB-GENE-041114-64	0.000426965	-0.308006	0.096	0.267	2
ENSDARG00000005774	ddx3b	DEAD (Asp-Glu-Ala-Asp) box helicase 3b [Source:ZFIN;Acc:ZDB-GENE-980526-150]	http://zfin.org/ZDB-GENE-980526-150	http://zfin.org/ZDB-GENE-980526-150	0.0859795	-0.307887	0.175	0.3	2
ENSDARG00000058220	tada3l	transcriptional adaptor 3 (NGG1 homolog, yeast)-like [Source:ZFIN;Acc:ZDB-GENE-030131-6725]	http://zfin.org/ZDB-GENE-030131-6725	http://zfin.org/ZDB-GENE-030131-6725	0.000479822	-0.307726	0.167	0.333	2
ENSDARG00000003952	pfn2	profilin 2 [Source:ZFIN;Acc:ZDB-GENE-040115-4]	http://zfin.org/ZDB-GENE-040115-4	http://zfin.org/ZDB-GENE-040115-4	8.36498e-07	-0.307691	0.395	0.417	2
ENSDARG00000051800	fnbp4	formin binding protein 4 [Source:ZFIN;Acc:ZDB-GENE-130530-633]	http://zfin.org/ZDB-GENE-130530-633	http://zfin.org/ZDB-GENE-130530-633	0.000113957	-0.30723	0.219	0.3	2
ENSDARG00000059908	si:ch211-217k17.7	si:ch211-217k17.7 [Source:ZFIN;Acc:ZDB-GENE-061009-11]	http://zfin.org/ZDB-GENE-061009-11	http://zfin.org/ZDB-GENE-061009-11	0.0135415	-0.306965	0.061	0.183	2
ENSDARG00000055708	timm8b	translocase of inner mitochondrial membrane 8 homolog B (yeast) [Source:ZFIN;Acc:ZDB-GENE-031019-1]	http://zfin.org/ZDB-GENE-031019-1	http://zfin.org/ZDB-GENE-031019-1	4.38995e-09	-0.3068	0.325	0.3	2
ENSDARG00000095388	BX323590.2		http://zfin.org/	http://zfin.org/	0.0113638	-0.306047	0.105	0.233	2
ENSDARG00000076847	tnrc6c1	trinucleotide repeat containing 6C1 [Source:ZFIN;Acc:ZDB-GENE-030131-7440]	http://zfin.org/ZDB-GENE-030131-7440	http://zfin.org/ZDB-GENE-030131-7440	1.77386e-08	-0.306	0.316	0.333	2
ENSDARG00000079377	arhgef38	Rho guanine nucleotide exchange factor (GEF) 38 [Source:ZFIN;Acc:ZDB-GENE-090313-83]	http://zfin.org/ZDB-GENE-090313-83	http://zfin.org/ZDB-GENE-090313-83	0.00818834	-0.305138	0.035	0.117	2
ENSDARG00000019417	gadd45ga	growth arrest and DNA-damage-inducible, gamma a [Source:ZFIN;Acc:ZDB-GENE-040426-1882]	http://zfin.org/ZDB-GENE-040426-1882	http://zfin.org/ZDB-GENE-040426-1882	0.123485	-0.305064	0.246	0.35	2
ENSDARG00000022340	ufc1	ubiquitin-fold modifier conjugating enzyme 1 [Source:ZFIN;Acc:ZDB-GENE-040801-268]	http://zfin.org/ZDB-GENE-040801-268	http://zfin.org/ZDB-GENE-040801-268	1.3136e-08	-0.304968	0.456	0.433	2
ENSDARG00000053446	sub1a	SUB1 homolog, transcriptional regulator a [Source:ZFIN;Acc:ZDB-GENE-050522-151]	http://zfin.org/ZDB-GENE-050522-151	http://zfin.org/ZDB-GENE-050522-151	6.60344e-07	-0.304703	0.921	0.833	2
ENSDARG00000011594	smarcb1b	SWI/SNF related, matrix associated, actin dependent regulator of chromatin, subfamily b, member 1b [Source:ZFIN;Acc:ZDB-GENE-991008-16]	http://zfin.org/ZDB-GENE-991008-16	http://zfin.org/ZDB-GENE-991008-16	2.09853e-08	-0.30452	0.167	0.267	2
ENSDARG00000032389	tspan12	tetraspanin 12 [Source:ZFIN;Acc:ZDB-GENE-040426-1285]	http://zfin.org/ZDB-GENE-040426-1285	http://zfin.org/ZDB-GENE-040426-1285	0.000182234	-0.304181	0.018	0.15	2
ENSDARG00000001241	puf60b	poly-U binding splicing factor b [Source:ZFIN;Acc:ZDB-GENE-040625-116]	http://zfin.org/ZDB-GENE-040625-116	http://zfin.org/ZDB-GENE-040625-116	0.0140915	-0.304029	0.263	0.383	2
ENSDARG00000067560	gtf2h3	general transcription factor IIH, polypeptide 3 [Source:ZFIN;Acc:ZDB-GENE-040718-302]	http://zfin.org/ZDB-GENE-040718-302	http://zfin.org/ZDB-GENE-040718-302	0.00401744	-0.303839	0.079	0.167	2
ENSDARG00000032578	pax2b	paired box 2b [Source:ZFIN;Acc:ZDB-GENE-001030-4]	http://zfin.org/ZDB-GENE-001030-4	http://zfin.org/ZDB-GENE-001030-4	0.0792905	-0.303732	0.105	0.183	2
ENSDARG00000071697	zgc:66433	zgc:66433 [Source:ZFIN;Acc:ZDB-GENE-030131-9832]	http://zfin.org/ZDB-GENE-030131-9832	http://zfin.org/ZDB-GENE-030131-9832	2.52069e-05	-0.30359	0.096	0.233	2
ENSDARG00000068289	eif3k	eukaryotic translation initiation factor 3, subunit K [Source:ZFIN;Acc:ZDB-GENE-050417-45]	http://zfin.org/ZDB-GENE-050417-45	http://zfin.org/ZDB-GENE-050417-45	0.00797623	-0.303386	0.368	0.45	2
ENSDARG00000030753	prrg4	proline rich Gla (G-carboxyglutamic acid) 4 (transmembrane) [Source:ZFIN;Acc:ZDB-GENE-050417-112]	http://zfin.org/ZDB-GENE-050417-112	http://zfin.org/ZDB-GENE-050417-112	0.000322251	-0.303369	0.044	0.133	2
ENSDARG00000002210	stk25a	serine/threonine kinase 25a [Source:ZFIN;Acc:ZDB-GENE-041010-92]	http://zfin.org/ZDB-GENE-041010-92	http://zfin.org/ZDB-GENE-041010-92	0.000915868	-0.30323	0.044	0.2	2
ENSDARG00000093535	BX005309.1		http://zfin.org/	http://zfin.org/	9.41727e-06	-0.302673	0.167	0.233	2
ENSDARG00000103490	dpysl4	dihydropyrimidinase-like 4 [Source:ZFIN;Acc:ZDB-GENE-050720-3]	http://zfin.org/ZDB-GENE-050720-3	http://zfin.org/ZDB-GENE-050720-3	0.0012311	-0.302495	0.026	0.15	2
ENSDARG00000036005	pitpnb	phosphatidylinositol transfer protein, beta [Source:ZFIN;Acc:ZDB-GENE-040426-895]	http://zfin.org/ZDB-GENE-040426-895	http://zfin.org/ZDB-GENE-040426-895	0.000252901	-0.302387	0.404	0.467	2
ENSDARG00000043502	ccdc124	coiled-coil domain containing 124 [Source:ZFIN;Acc:ZDB-GENE-040426-1483]	http://zfin.org/ZDB-GENE-040426-1483	http://zfin.org/ZDB-GENE-040426-1483	0.00574394	-0.302249	0.298	0.367	2
ENSDARG00000063572	perp	PERP, TP53 apoptosis effector [Source:ZFIN;Acc:ZDB-GENE-050104-1]	http://zfin.org/ZDB-GENE-050104-1	http://zfin.org/ZDB-GENE-050104-1	0.0284283	-0.302207	0.351	0.45	2
ENSDARG00000043663	faub	Finkel-Biskis-Reilly murine sarcoma virus (FBR-MuSV) ubiquitously expressed b [Source:ZFIN;Acc:ZDB-GENE-050417-416]	http://zfin.org/ZDB-GENE-050417-416	http://zfin.org/ZDB-GENE-050417-416	0.000424995	-0.302162	0.386	0.433	2
ENSDARG00000094107	si:ch73-37h15.2	si:ch73-37h15.2 [Source:ZFIN;Acc:ZDB-GENE-041008-214]	http://zfin.org/ZDB-GENE-041008-214	http://zfin.org/ZDB-GENE-041008-214	0.00058835	-0.302069	0.079	0.183	2
ENSDARG00000034146	ccnk	cyclin K [Source:ZFIN;Acc:ZDB-GENE-030131-5126]	http://zfin.org/ZDB-GENE-030131-5126	http://zfin.org/ZDB-GENE-030131-5126	0.014047	-0.301913	0.018	0.117	2
ENSDARG00000006395	rbm25b	RNA binding motif protein 25b [Source:ZFIN;Acc:ZDB-GENE-030131-5547]	http://zfin.org/ZDB-GENE-030131-5547	http://zfin.org/ZDB-GENE-030131-5547	0.00577893	-0.301803	0.167	0.3	2
ENSDARG00000034195	top2b	topoisomerase (DNA) II beta [Source:ZFIN;Acc:ZDB-GENE-041008-136]	http://zfin.org/ZDB-GENE-041008-136	http://zfin.org/ZDB-GENE-041008-136	0.000250371	-0.301555	0.219	0.267	2
ENSDARG00000067593	sco1	SCO1 cytochrome c oxidase assembly protein [Source:ZFIN;Acc:ZDB-GENE-140909-1]	http://zfin.org/ZDB-GENE-140909-1	http://zfin.org/ZDB-GENE-140909-1	3.20654e-05	-0.300916	0.14	0.233	2
ENSDARG00000004427	dpy30	dpy-30 histone methyltransferase complex regulatory subunit [Source:ZFIN;Acc:ZDB-GENE-040718-136]	http://zfin.org/ZDB-GENE-040718-136	http://zfin.org/ZDB-GENE-040718-136	2.30764e-05	-0.300897	0.868	0.783	2
ENSDARG00000045692	pphln1	periphilin 1 [Source:ZFIN;Acc:ZDB-GENE-030131-1873]	http://zfin.org/ZDB-GENE-030131-1873	http://zfin.org/ZDB-GENE-030131-1873	0.00741079	-0.30018	0.07	0.25	2
ENSDARG00000077533	eif3f	eukaryotic translation initiation factor 3, subunit F [Source:ZFIN;Acc:ZDB-GENE-100215-2]	http://zfin.org/ZDB-GENE-100215-2	http://zfin.org/ZDB-GENE-100215-2	5.21327e-08	-0.300158	0.904	0.767	2
ENSDARG00000053395	cdkn2aipnl	CDKN2A interacting protein N-terminal like [Source:ZFIN;Acc:ZDB-GENE-041010-154]	http://zfin.org/ZDB-GENE-041010-154	http://zfin.org/ZDB-GENE-041010-154	0.000511727	-0.300005	0.342	0.433	2
ENSDARG00000035776	n6amt1	N-6 adenine-specific DNA methyltransferase 1 (putative) [Source:ZFIN;Acc:ZDB-GENE-040718-206]	http://zfin.org/ZDB-GENE-040718-206	http://zfin.org/ZDB-GENE-040718-206	0.000623508	-0.299808	0.061	0.2	2
ENSDARG00000003846	mrpl21	mitochondrial ribosomal protein L21 [Source:ZFIN;Acc:ZDB-GENE-061027-183]	http://zfin.org/ZDB-GENE-061027-183	http://zfin.org/ZDB-GENE-061027-183	0.0140214	-0.299707	0.167	0.217	2
ENSDARG00000026908	tmed2	transmembrane p24 trafficking protein 2 [Source:ZFIN;Acc:ZDB-GENE-030131-269]	http://zfin.org/ZDB-GENE-030131-269	http://zfin.org/ZDB-GENE-030131-269	9.931e-05	-0.299446	0.526	0.517	2
ENSDARG00000020201	cdc73	cell division cycle 73, Paf1/RNA polymerase II complex component, homolog (S. cerevisiae) [Source:ZFIN;Acc:ZDB-GENE-040426-1309]	http://zfin.org/ZDB-GENE-040426-1309	http://zfin.org/ZDB-GENE-040426-1309	0.000387613	-0.29944	0.149	0.267	2
ENSDARG00000029252	ssb	Sjogren syndrome antigen B (autoantigen La) [Source:ZFIN;Acc:ZDB-GENE-030131-223]	http://zfin.org/ZDB-GENE-030131-223	http://zfin.org/ZDB-GENE-030131-223	0.00610719	-0.298601	0.044	0.2	2
ENSDARG00000092358	BX469930.1		http://zfin.org/	http://zfin.org/	0.000652284	-0.298437	0.246	0.25	2
ENSDARG00000030441	ppa1b	pyrophosphatase (inorganic) 1b [Source:ZFIN;Acc:ZDB-GENE-050417-375]	http://zfin.org/ZDB-GENE-050417-375	http://zfin.org/ZDB-GENE-050417-375	0.00106132	-0.298411	0.325	0.433	2
ENSDARG00000016263	zdhhc5a	zinc finger, DHHC-type containing 5a [Source:ZFIN;Acc:ZDB-GENE-090312-92]	http://zfin.org/ZDB-GENE-090312-92	http://zfin.org/ZDB-GENE-090312-92	0.00397374	-0.298329	0.07	0.117	2
ENSDARG00000010946	cbsb	cystathionine-beta-synthase b [Source:ZFIN;Acc:ZDB-GENE-021030-3]	http://zfin.org/ZDB-GENE-021030-3	http://zfin.org/ZDB-GENE-021030-3	0.000335986	-0.297864	0.298	0.367	2
ENSDARG00000018593	parp16	poly (ADP-ribose) polymerase family, member 16 [Source:ZFIN;Acc:ZDB-GENE-040426-2289]	http://zfin.org/ZDB-GENE-040426-2289	http://zfin.org/ZDB-GENE-040426-2289	0.00753874	-0.297824	0.096	0.233	2
ENSDARG00000103404	uchl5	ubiquitin carboxyl-terminal hydrolase L5 [Source:ZFIN;Acc:ZDB-GENE-040426-2051]	http://zfin.org/ZDB-GENE-040426-2051	http://zfin.org/ZDB-GENE-040426-2051	3.88636e-05	-0.297574	0.096	0.217	2
ENSDARG00000015385	ndufs3	NADH dehydrogenase (ubiquinone) Fe-S protein 3, (NADH-coenzyme Q reductase) [Source:ZFIN;Acc:ZDB-GENE-050417-274]	http://zfin.org/ZDB-GENE-050417-274	http://zfin.org/ZDB-GENE-050417-274	0.000234105	-0.297513	0.675	0.683	2
ENSDARG00000002168	tra2b	transformer 2 beta homolog (Drosophila) [Source:ZFIN;Acc:ZDB-GENE-040426-1094]	http://zfin.org/ZDB-GENE-040426-1094	http://zfin.org/ZDB-GENE-040426-1094	5.46527e-05	-0.29737	0.281	0.333	2
ENSDARG00000103578	gtf2b	general transcription factor IIB [Source:ZFIN;Acc:ZDB-GENE-030131-3544]	http://zfin.org/ZDB-GENE-030131-3544	http://zfin.org/ZDB-GENE-030131-3544	7.47437e-06	-0.297227	0.272	0.367	2
ENSDARG00000011020	hnrnpa1a	heterogeneous nuclear ribonucleoprotein A1a [Source:ZFIN;Acc:ZDB-GENE-040426-1546]	http://zfin.org/ZDB-GENE-040426-1546	http://zfin.org/ZDB-GENE-040426-1546	0.0201154	-0.296845	0.123	0.3	2
ENSDARG00000012820	nop56	NOP56 ribonucleoprotein homolog [Source:ZFIN;Acc:ZDB-GENE-040109-1]	http://zfin.org/ZDB-GENE-040109-1	http://zfin.org/ZDB-GENE-040109-1	0.000666327	-0.296382	0.281	0.4	2
ENSDARG00000015538	znf207a	zinc finger protein 207, a [Source:ZFIN;Acc:ZDB-GENE-040426-2273]	http://zfin.org/ZDB-GENE-040426-2273	http://zfin.org/ZDB-GENE-040426-2273	0.000543844	-0.296348	0.035	0.133	2
ENSDARG00000029150	hsp90ab1	heat shock protein 90, alpha (cytosolic), class B member 1 [Source:ZFIN;Acc:ZDB-GENE-990415-95]	http://zfin.org/ZDB-GENE-990415-95	http://zfin.org/ZDB-GENE-990415-95	0.00149806	-0.296318	1	1	2
ENSDARG00000008808	eml2	echinoderm microtubule associated protein like 2 [Source:ZFIN;Acc:ZDB-GENE-050706-71]	http://zfin.org/ZDB-GENE-050706-71	http://zfin.org/ZDB-GENE-050706-71	3.26131e-05	-0.295202	0.763	0.7	2
ENSDARG00000004774	wdr36	WD repeat domain 36 [Source:ZFIN;Acc:ZDB-GENE-030131-464]	http://zfin.org/ZDB-GENE-030131-464	http://zfin.org/ZDB-GENE-030131-464	8.17114e-06	-0.294398	0.053	0.15	2
ENSDARG00000043402	MRPL55	zgc:171480 [Source:ZFIN;Acc:ZDB-GENE-080204-83]	http://zfin.org/ZDB-GENE-080204-83	http://zfin.org/ZDB-GENE-080204-83	0.00876639	-0.294362	0.263	0.4	2
ENSDARG00000088984	cep131	centrosomal protein 131 [Source:ZFIN;Acc:ZDB-GENE-090508-16]	http://zfin.org/ZDB-GENE-090508-16	http://zfin.org/ZDB-GENE-090508-16	0.000368059	-0.294127	0.14	0.25	2
ENSDARG00000070589	mrpl35	mitochondrial ribosomal protein L35 [Source:ZFIN;Acc:ZDB-GENE-060929-1082]	http://zfin.org/ZDB-GENE-060929-1082	http://zfin.org/ZDB-GENE-060929-1082	1.11397e-06	-0.293967	0.237	0.283	2
ENSDARG00000070386	krtcap2	keratinocyte associated protein 2 [Source:ZFIN;Acc:ZDB-GENE-060825-91]	http://zfin.org/ZDB-GENE-060825-91	http://zfin.org/ZDB-GENE-060825-91	1.28142e-05	-0.293805	0.202	0.25	2
ENSDARG00000009001	pdia6	protein disulfide isomerase family A, member 6 [Source:ZFIN;Acc:ZDB-GENE-030131-879]	http://zfin.org/ZDB-GENE-030131-879	http://zfin.org/ZDB-GENE-030131-879	0.0642775	-0.293661	0.43	0.55	2
ENSDARG00000037009	banf1	barrier to autointegration factor 1 [Source:ZFIN;Acc:ZDB-GENE-030131-6657]	http://zfin.org/ZDB-GENE-030131-6657	http://zfin.org/ZDB-GENE-030131-6657	0.0151247	-0.293601	0.281	0.333	2
ENSDARG00000016368	zbtb8os	zinc finger and BTB domain containing 8 opposite strand [Source:ZFIN;Acc:ZDB-GENE-050417-176]	http://zfin.org/ZDB-GENE-050417-176	http://zfin.org/ZDB-GENE-050417-176	8.49238e-05	-0.292784	0.342	0.383	2
ENSDARG00000099766	myl12.1	myosin, light chain 12, genome duplicate 1 [Source:ZFIN;Acc:ZDB-GENE-030131-4918]	http://zfin.org/ZDB-GENE-030131-4918	http://zfin.org/ZDB-GENE-030131-4918	0.000578198	-0.29261	0.807	0.783	2
ENSDARG00000096988	CR589944.1		http://zfin.org/	http://zfin.org/	0.000370976	-0.292589	0.026	0.133	2
ENSDARG00000008218	znf410	zinc finger protein 410 [Source:ZFIN;Acc:ZDB-GENE-040426-1817]	http://zfin.org/ZDB-GENE-040426-1817	http://zfin.org/ZDB-GENE-040426-1817	5.33471e-06	-0.292564	0.123	0.2	2
ENSDARG00000086216	prr13	proline rich 13 [Source:ZFIN;Acc:ZDB-GENE-080709-1]	http://zfin.org/ZDB-GENE-080709-1	http://zfin.org/ZDB-GENE-080709-1	0.0017606	-0.292132	0.482	0.567	2
ENSDARG00000068436	h3f3b.1	H3 histone, family 3B.1 [Source:ZFIN;Acc:ZDB-GENE-050417-65]	http://zfin.org/ZDB-GENE-050417-65	http://zfin.org/ZDB-GENE-050417-65	1.76975e-06	-0.29194	0.956	0.867	2
ENSDARG00000037182	surf2	surfeit 2 [Source:ZFIN;Acc:ZDB-GENE-040801-86]	http://zfin.org/ZDB-GENE-040801-86	http://zfin.org/ZDB-GENE-040801-86	7.31366e-06	-0.291633	0.044	0.133	2
ENSDARG00000029612	gpkow	G patch domain and KOW motifs [Source:ZFIN;Acc:ZDB-GENE-030616-159]	http://zfin.org/ZDB-GENE-030616-159	http://zfin.org/ZDB-GENE-030616-159	5.13621e-05	-0.291181	0.096	0.233	2
ENSDARG00000041887	sf3a1	splicing factor 3a, subunit 1 [Source:ZFIN;Acc:ZDB-GENE-030616-156]	http://zfin.org/ZDB-GENE-030616-156	http://zfin.org/ZDB-GENE-030616-156	0.0165457	-0.291057	0.202	0.333	2
ENSDARG00000059046	psmd5	proteasome 26S subunit, non-ATPase 5 [Source:ZFIN;Acc:ZDB-GENE-050417-28]	http://zfin.org/ZDB-GENE-050417-28	http://zfin.org/ZDB-GENE-050417-28	0.000176101	-0.290773	0.053	0.133	2
ENSDARG00000069855	pnisr	PNN-interacting serine/arginine-rich protein [Source:ZFIN;Acc:ZDB-GENE-030131-362]	http://zfin.org/ZDB-GENE-030131-362	http://zfin.org/ZDB-GENE-030131-362	0.000432038	-0.290593	0.184	0.283	2
ENSDARG00000043177	lsm1	LSM1, U6 small nuclear RNA associated [Source:ZFIN;Acc:ZDB-GENE-040801-68]	http://zfin.org/ZDB-GENE-040801-68	http://zfin.org/ZDB-GENE-040801-68	0.0147486	-0.290307	0.202	0.35	2
ENSDARG00000057321	tut1	terminal uridylyl transferase 1, U6 snRNA-specific [Source:ZFIN;Acc:ZDB-GENE-050706-68]	http://zfin.org/ZDB-GENE-050706-68	http://zfin.org/ZDB-GENE-050706-68	0.00145697	-0.290173	0	0.117	2
ENSDARG00000060036	aimp1	aminoacyl tRNA synthetase complex-interacting multifunctional protein 1 [Source:ZFIN;Acc:ZDB-GENE-060825-144]	http://zfin.org/ZDB-GENE-060825-144	http://zfin.org/ZDB-GENE-060825-144	0.000784411	-0.290022	0.211	0.283	2
ENSDARG00000033604	lrpap1	low density lipoprotein receptor-related protein associated protein 1 [Source:ZFIN;Acc:ZDB-GENE-030131-5871]	http://zfin.org/ZDB-GENE-030131-5871	http://zfin.org/ZDB-GENE-030131-5871	0.0406229	-0.289657	0.123	0.267	2
ENSDARG00000063145	tfam	transcription factor A, mitochondrial [Source:ZFIN;Acc:ZDB-GENE-061013-552]	http://zfin.org/ZDB-GENE-061013-552	http://zfin.org/ZDB-GENE-061013-552	6.06196e-05	-0.289235	0.193	0.25	2
ENSDARG00000037318	ddost	dolichyl-diphosphooligosaccharide--protein glycosyltransferase subunit (non-catalytic) [Source:ZFIN;Acc:ZDB-GENE-040426-2147]	http://zfin.org/ZDB-GENE-040426-2147	http://zfin.org/ZDB-GENE-040426-2147	0.00573384	-0.289175	0.368	0.483	2
ENSDARG00000060071	papd5	PAP associated domain containing 5 [Source:ZFIN;Acc:ZDB-GENE-041021-2]	http://zfin.org/ZDB-GENE-041021-2	http://zfin.org/ZDB-GENE-041021-2	9.5356e-06	-0.289066	0.184	0.267	2
ENSDARG00000015835	eif4e2rs1	eukaryotic translation initiation factor 4E family member 2 related sequence 1 [Source:ZFIN;Acc:ZDB-GENE-040426-1728]	http://zfin.org/ZDB-GENE-040426-1728	http://zfin.org/ZDB-GENE-040426-1728	0.0030042	-0.28906	0.377	0.467	2
ENSDARG00000009170	ctr9	CTR9 homolog, Paf1/RNA polymerase II complex component [Source:ZFIN;Acc:ZDB-GENE-030131-3782]	http://zfin.org/ZDB-GENE-030131-3782	http://zfin.org/ZDB-GENE-030131-3782	2.06972e-09	-0.288634	0.149	0.15	2
ENSDARG00000098228	thrap3b	thyroid hormone receptor associated protein 3b [Source:ZFIN;Acc:ZDB-GENE-040516-9]	http://zfin.org/ZDB-GENE-040516-9	http://zfin.org/ZDB-GENE-040516-9	0.0395688	-0.287982	0.158	0.317	2
ENSDARG00000037177	zc3h13	zinc finger CCCH-type containing 13 [Source:ZFIN;Acc:ZDB-GENE-040426-1619]	http://zfin.org/ZDB-GENE-040426-1619	http://zfin.org/ZDB-GENE-040426-1619	8.69151e-05	-0.287668	0.211	0.267	2
ENSDARG00000010316	qars	glutaminyl-tRNA synthetase [Source:ZFIN;Acc:ZDB-GENE-040426-1011]	http://zfin.org/ZDB-GENE-040426-1011	http://zfin.org/ZDB-GENE-040426-1011	0.000253144	-0.28743	0.114	0.2	2
ENSDARG00000000853	dstyk	dual serine/threonine and tyrosine protein kinase [Source:ZFIN;Acc:ZDB-GENE-040826-2]	http://zfin.org/ZDB-GENE-040826-2	http://zfin.org/ZDB-GENE-040826-2	0.0052435	-0.287392	0.096	0.217	2
ENSDARG00000057234	chtopa	chromatin target of PRMT1a [Source:ZFIN;Acc:ZDB-GENE-030131-210]	http://zfin.org/ZDB-GENE-030131-210	http://zfin.org/ZDB-GENE-030131-210	0.0350503	-0.287108	0.368	0.45	2
ENSDARG00000071878	trmt112	tRNA methyltransferase 11-2 homolog (S. cerevisiae) [Source:ZFIN;Acc:ZDB-GENE-050522-30]	http://zfin.org/ZDB-GENE-050522-30	http://zfin.org/ZDB-GENE-050522-30	5.24901e-07	-0.286877	0.377	0.35	2
ENSDARG00000013681	si:dkey-42i9.6	si:dkey-42i9.6 [Source:ZFIN;Acc:ZDB-GENE-030131-6596]	http://zfin.org/ZDB-GENE-030131-6596	http://zfin.org/ZDB-GENE-030131-6596	8.46951e-06	-0.286308	0.096	0.15	2
ENSDARG00000024478	mpc2	mitochondrial pyruvate carrier 2 [Source:ZFIN;Acc:ZDB-GENE-030131-330]	http://zfin.org/ZDB-GENE-030131-330	http://zfin.org/ZDB-GENE-030131-330	0.000837887	-0.286159	0.711	0.667	2
ENSDARG00000059373	dnajc8	DnaJ (Hsp40) homolog, subfamily C, member 8 [Source:ZFIN;Acc:ZDB-GENE-030131-66]	http://zfin.org/ZDB-GENE-030131-66	http://zfin.org/ZDB-GENE-030131-66	0.000152331	-0.286116	0.465	0.533	2
ENSDARG00000022788	cops7a	COP9 constitutive photomorphogenic homolog subunit 7A [Source:ZFIN;Acc:ZDB-GENE-030131-8680]	http://zfin.org/ZDB-GENE-030131-8680	http://zfin.org/ZDB-GENE-030131-8680	0.0103745	-0.28583	0.333	0.467	2
ENSDARG00000045159	zdhhc4	zinc finger, DHHC-type containing 4 [Source:ZFIN;Acc:ZDB-GENE-030131-9031]	http://zfin.org/ZDB-GENE-030131-9031	http://zfin.org/ZDB-GENE-030131-9031	0.121065	-0.285777	0.202	0.3	2
ENSDARG00000005699	ddx19	DEAD/H (Asp-Glu-Ala-Asp/His) box polypeptide 19 (DBP5 homolog, yeast) [Source:ZFIN;Acc:ZDB-GENE-020419-30]	http://zfin.org/ZDB-GENE-020419-30	http://zfin.org/ZDB-GENE-020419-30	0.04211	-0.285701	0.184	0.3	2
ENSDARG00000042236	atrx	alpha thalassemia/mental retardation syndrome X-linked homolog (human) [Source:ZFIN;Acc:ZDB-GENE-030912-11]	http://zfin.org/ZDB-GENE-030912-11	http://zfin.org/ZDB-GENE-030912-11	1.3422e-05	-0.28567	0.368	0.383	2
ENSDARG00000038785	abcf2a	ATP-binding cassette, sub-family F (GCN20), member 2a [Source:ZFIN;Acc:ZDB-GENE-030131-8714]	http://zfin.org/ZDB-GENE-030131-8714	http://zfin.org/ZDB-GENE-030131-8714	0.00073536	-0.285388	0.167	0.25	2
ENSDARG00000011462	otub1b	OTU deubiquitinase, ubiquitin aldehyde binding 1b [Source:ZFIN;Acc:ZDB-GENE-040718-204]	http://zfin.org/ZDB-GENE-040718-204	http://zfin.org/ZDB-GENE-040718-204	1.51498e-06	-0.285273	0.377	0.417	2
ENSDARG00000005551	hnrnph1l	heterogeneous nuclear ribonucleoprotein H1, like [Source:ZFIN;Acc:ZDB-GENE-030131-275]	http://zfin.org/ZDB-GENE-030131-275	http://zfin.org/ZDB-GENE-030131-275	0.0424429	-0.284991	0.237	0.45	2
ENSDARG00000022280	brd2a	bromodomain containing 2a [Source:ZFIN;Acc:ZDB-GENE-990415-248]	http://zfin.org/ZDB-GENE-990415-248	http://zfin.org/ZDB-GENE-990415-248	6.31138e-06	-0.284832	0.491	0.45	2
ENSDARG00000060853	nckap1	NCK-associated protein 1 [Source:ZFIN;Acc:ZDB-GENE-030131-4426]	http://zfin.org/ZDB-GENE-030131-4426	http://zfin.org/ZDB-GENE-030131-4426	2.6769e-09	-0.284516	0.14	0.167	2
ENSDARG00000089230	si:ch211-253b8.2	si:ch211-253b8.2 [Source:ZFIN;Acc:ZDB-GENE-030131-4633]	http://zfin.org/ZDB-GENE-030131-4633	http://zfin.org/ZDB-GENE-030131-4633	6.50275e-05	-0.284007	0.114	0.167	2
ENSDARG00000006642	drg2	developmentally regulated GTP binding protein 2 [Source:ZFIN;Acc:ZDB-GENE-040808-29]	http://zfin.org/ZDB-GENE-040808-29	http://zfin.org/ZDB-GENE-040808-29	4.34951e-06	-0.28393	0.167	0.3	2
ENSDARG00000104530	ZNF609 (1 of many)	zinc finger protein 609 [Source:RefSeq peptide;Acc:NP_001025252]	http://zfin.org/	http://zfin.org/	0.000695897	-0.28364	0.149	0.167	2
ENSDARG00000053047	eif2s2	eukaryotic translation initiation factor 2, subunit 2 beta [Source:ZFIN;Acc:ZDB-GENE-030131-3085]	http://zfin.org/ZDB-GENE-030131-3085	http://zfin.org/ZDB-GENE-030131-3085	0.00442938	-0.283411	0.553	0.6	2
ENSDARG00000033855	rqcd1	RCD1 required for cell differentiation1 homolog (S. pombe) [Source:ZFIN;Acc:ZDB-GENE-030131-1558]	http://zfin.org/ZDB-GENE-030131-1558	http://zfin.org/ZDB-GENE-030131-1558	0.003171	-0.282876	0.377	0.467	2
ENSDARG00000094646	dyrk2	dual-specificity tyrosine-(Y)-phosphorylation regulated kinase 2 [Source:ZFIN;Acc:ZDB-GENE-030131-2804]	http://zfin.org/ZDB-GENE-030131-2804	http://zfin.org/ZDB-GENE-030131-2804	0.00231421	-0.28286	0.114	0.25	2
ENSDARG00000094272	map3k19	mitogen-activated protein kinase kinase kinase 19 [Source:ZFIN;Acc:ZDB-GENE-081104-140]	http://zfin.org/ZDB-GENE-081104-140	http://zfin.org/ZDB-GENE-081104-140	0.0121952	-0.282239	0.009	0.133	2
ENSDARG00000037070	tmem242	transmembrane protein 242 [Source:ZFIN;Acc:ZDB-GENE-040724-146]	http://zfin.org/ZDB-GENE-040724-146	http://zfin.org/ZDB-GENE-040724-146	0.0140649	-0.281942	0.061	0.183	2
ENSDARG00000100003	glulb	glutamate-ammonia ligase (glutamine synthase) b [Source:ZFIN;Acc:ZDB-GENE-030131-8417]	http://zfin.org/ZDB-GENE-030131-8417	http://zfin.org/ZDB-GENE-030131-8417	3.5763e-06	-0.281668	0.956	0.883	2
ENSDARG00000003931	cndp2	CNDP dipeptidase 2 (metallopeptidase M20 family) [Source:ZFIN;Acc:ZDB-GENE-030131-5499]	http://zfin.org/ZDB-GENE-030131-5499	http://zfin.org/ZDB-GENE-030131-5499	0.00237669	-0.280892	0.053	0.233	2
ENSDARG00000040121	psma2	proteasome subunit alpha 2 [Source:ZFIN;Acc:ZDB-GENE-050522-479]	http://zfin.org/ZDB-GENE-050522-479	http://zfin.org/ZDB-GENE-050522-479	2.74247e-06	-0.280723	0.649	0.583	2
ENSDARG00000019000	smc3	structural maintenance of chromosomes 3 [Source:ZFIN;Acc:ZDB-GENE-030131-3196]	http://zfin.org/ZDB-GENE-030131-3196	http://zfin.org/ZDB-GENE-030131-3196	7.9176e-06	-0.28043	0.149	0.267	2
ENSDARG00000062568	mrpl2	mitochondrial ribosomal protein L2 [Source:ZFIN;Acc:ZDB-GENE-050809-12]	http://zfin.org/ZDB-GENE-050809-12	http://zfin.org/ZDB-GENE-050809-12	0.0163327	-0.279391	0.123	0.317	2
ENSDARG00000052348	smarca5	SWI/SNF related, matrix associated, actin dependent regulator of chromatin, subfamily a, member 5 [Source:ZFIN;Acc:ZDB-GENE-021125-1]	http://zfin.org/ZDB-GENE-021125-1	http://zfin.org/ZDB-GENE-021125-1	0.0494454	-0.27927	0.132	0.267	2
ENSDARG00000056138	sf3b1	splicing factor 3b, subunit 1 [Source:ZFIN;Acc:ZDB-GENE-040827-3]	http://zfin.org/ZDB-GENE-040827-3	http://zfin.org/ZDB-GENE-040827-3	1.89089e-05	-0.279163	0.281	0.317	2
ENSDARG00000002082	csnk2a1	casein kinase 2, alpha 1 polypeptide [Source:ZFIN;Acc:ZDB-GENE-990415-27]	http://zfin.org/ZDB-GENE-990415-27	http://zfin.org/ZDB-GENE-990415-27	0.0439847	-0.279148	0.395	0.517	2
ENSDARG00000055357	leo1	LEO1 homolog, Paf1/RNA polymerase II complex component [Source:ZFIN;Acc:ZDB-GENE-040426-2435]	http://zfin.org/ZDB-GENE-040426-2435	http://zfin.org/ZDB-GENE-040426-2435	0.000991249	-0.27883	0.096	0.2	2
ENSDARG00000058342	grhl2a	grainyhead-like transcription factor 2a [Source:ZFIN;Acc:ZDB-GENE-050913-123]	http://zfin.org/ZDB-GENE-050913-123	http://zfin.org/ZDB-GENE-050913-123	0.00934675	-0.278802	0.035	0.167	2
ENSDARG00000014230	dlst	dihydrolipoamide S-succinyltransferase [Source:ZFIN;Acc:ZDB-GENE-030326-1]	http://zfin.org/ZDB-GENE-030326-1	http://zfin.org/ZDB-GENE-030326-1	0.00110085	-0.278715	0.386	0.433	2
ENSDARG00000041215	cetn4	centrin 4 [Source:ZFIN;Acc:ZDB-GENE-030826-21]	http://zfin.org/ZDB-GENE-030826-21	http://zfin.org/ZDB-GENE-030826-21	0.00210416	-0.278496	0.789	0.75	2
ENSDARG00000010149	atp5a1	ATP synthase, H+ transporting, mitochondrial F1 complex, alpha subunit 1, cardiac muscle [Source:ZFIN;Acc:ZDB-GENE-060201-1]	http://zfin.org/ZDB-GENE-060201-1	http://zfin.org/ZDB-GENE-060201-1	0.000220237	-0.27846	0.868	0.783	2
ENSDARG00000009494	xrcc1	X-ray repair complementing defective repair in Chinese hamster cells 1 [Source:ZFIN;Acc:ZDB-GENE-040822-30]	http://zfin.org/ZDB-GENE-040822-30	http://zfin.org/ZDB-GENE-040822-30	0.00172082	-0.278389	0.035	0.183	2
ENSDARG00000104169	si:ch211-212k18.4	si:ch211-212k18.4 [Source:ZFIN;Acc:ZDB-GENE-141216-265]	http://zfin.org/ZDB-GENE-141216-265	http://zfin.org/ZDB-GENE-141216-265	1.80469e-09	-0.27831	0.193	0.233	2
ENSDARG00000007204	si:ch211-195b21.5	si:ch211-195b21.5 [Source:ZFIN;Acc:ZDB-GENE-030131-954]	http://zfin.org/ZDB-GENE-030131-954	http://zfin.org/ZDB-GENE-030131-954	0.000838686	-0.278269	0.175	0.25	2
ENSDARG00000041155	morf4l1	mortality factor 4 like 1 [Source:ZFIN;Acc:ZDB-GENE-040718-348]	http://zfin.org/ZDB-GENE-040718-348	http://zfin.org/ZDB-GENE-040718-348	4.46943e-06	-0.278007	0.474	0.483	2
ENSDARG00000032876	trit1	tRNA isopentenyltransferase 1 [Source:ZFIN;Acc:ZDB-GENE-060503-297]	http://zfin.org/ZDB-GENE-060503-297	http://zfin.org/ZDB-GENE-060503-297	0.00135078	-0.27799	0.07	0.217	2
ENSDARG00000077245	si:dkey-225n22.4	si:dkey-225n22.4 [Source:ZFIN;Acc:ZDB-GENE-120709-30]	http://zfin.org/ZDB-GENE-120709-30	http://zfin.org/ZDB-GENE-120709-30	0.0231502	-0.277969	0.035	0.15	2
ENSDARG00000004574	gtf3c2	general transcription factor IIIC, polypeptide 2, beta [Source:ZFIN;Acc:ZDB-GENE-041014-349]	http://zfin.org/ZDB-GENE-041014-349	http://zfin.org/ZDB-GENE-041014-349	0.00555744	-0.277823	0.009	0.15	2
ENSDARG00000046030	zgc:110339	zgc:110339 [Source:ZFIN;Acc:ZDB-GENE-050417-323]	http://zfin.org/ZDB-GENE-050417-323	http://zfin.org/ZDB-GENE-050417-323	0.00202392	-0.277715	0.149	0.233	2
ENSDARG00000015325	u2af1	U2 small nuclear RNA auxiliary factor 1 [Source:ZFIN;Acc:ZDB-GENE-020419-1]	http://zfin.org/ZDB-GENE-020419-1	http://zfin.org/ZDB-GENE-020419-1	0.000843829	-0.277008	0.439	0.467	2
ENSDARG00000057114	hpf1	histone PARylation factor 1 [Source:ZFIN;Acc:ZDB-GENE-030131-740]	http://zfin.org/ZDB-GENE-030131-740	http://zfin.org/ZDB-GENE-030131-740	0.0013943	-0.276922	0.07	0.167	2
ENSDARG00000017728	phb2b	prohibitin 2b [Source:ZFIN;Acc:ZDB-GENE-040718-430]	http://zfin.org/ZDB-GENE-040718-430	http://zfin.org/ZDB-GENE-040718-430	0.0120457	-0.276921	0.175	0.4	2
ENSDARG00000054122	TMEM30B	zgc:91908 [Source:ZFIN;Acc:ZDB-GENE-040704-17]	http://zfin.org/ZDB-GENE-040704-17	http://zfin.org/ZDB-GENE-040704-17	0.00104536	-0.276888	0.123	0.183	2
ENSDARG00000037361	kdelr2b	KDEL (Lys-Asp-Glu-Leu) endoplasmic reticulum protein retention receptor 2b [Source:ZFIN;Acc:ZDB-GENE-030131-4189]	http://zfin.org/ZDB-GENE-030131-4189	http://zfin.org/ZDB-GENE-030131-4189	0.0239899	-0.276829	0.175	0.317	2
ENSDARG00000068265	tomm5	translocase of outer mitochondrial membrane 5 homolog (yeast) [Source:ZFIN;Acc:ZDB-GENE-040724-90]	http://zfin.org/ZDB-GENE-040724-90	http://zfin.org/ZDB-GENE-040724-90	7.23138e-05	-0.276102	0.43	0.433	2
ENSDARG00000016484	dkc1	dyskeratosis congenita 1, dyskerin [Source:ZFIN;Acc:ZDB-GENE-031118-120]	http://zfin.org/ZDB-GENE-031118-120	http://zfin.org/ZDB-GENE-031118-120	0.034398	-0.276085	0.368	0.467	2
ENSDARG00000035924	dync1li2	dynein, cytoplasmic 1, light intermediate chain 2 [Source:ZFIN;Acc:ZDB-GENE-050417-156]	http://zfin.org/ZDB-GENE-050417-156	http://zfin.org/ZDB-GENE-050417-156	0.000375827	-0.276083	0.158	0.217	2
ENSDARG00000099431	med24	mediator complex subunit 24 [Source:ZFIN;Acc:ZDB-GENE-030131-2341]	http://zfin.org/ZDB-GENE-030131-2341	http://zfin.org/ZDB-GENE-030131-2341	0.00210757	-0.275904	0.026	0.15	2
ENSDARG00000075559	ppm1g	protein phosphatase, Mg2+/Mn2+ dependent, 1G [Source:ZFIN;Acc:ZDB-GENE-030425-4]	http://zfin.org/ZDB-GENE-030425-4	http://zfin.org/ZDB-GENE-030425-4	4.01066e-05	-0.275851	0.105	0.233	2
ENSDARG00000028201	commd8	COMM domain containing 8 [Source:ZFIN;Acc:ZDB-GENE-061103-124]	http://zfin.org/ZDB-GENE-061103-124	http://zfin.org/ZDB-GENE-061103-124	0.00173913	-0.275846	0.105	0.233	2
ENSDARG00000021913	ak9	adenylate kinase 9 [Source:ZFIN;Acc:ZDB-GENE-041014-337]	http://zfin.org/ZDB-GENE-041014-337	http://zfin.org/ZDB-GENE-041014-337	1.02878e-06	-0.275841	0.158	0.167	2
ENSDARG00000068640	rsf1b.1	remodeling and spacing factor 1b, tandem duplicate 1 [Source:ZFIN;Acc:ZDB-GENE-030131-5829]	http://zfin.org/ZDB-GENE-030131-5829	http://zfin.org/ZDB-GENE-030131-5829	0.0260987	-0.275779	0.044	0.133	2
ENSDARG00000096651	gpr108	G protein-coupled receptor 108 [Source:ZFIN;Acc:ZDB-GENE-121214-129]	http://zfin.org/ZDB-GENE-121214-129	http://zfin.org/ZDB-GENE-121214-129	1.21088e-05	-0.27545	0.263	0.317	2
ENSDARG00000021550	rad23b	RAD23 homolog B, nucleotide excision repair protein [Source:ZFIN;Acc:ZDB-GENE-040426-1487]	http://zfin.org/ZDB-GENE-040426-1487	http://zfin.org/ZDB-GENE-040426-1487	3.08937e-06	-0.275043	0.412	0.417	2
ENSDARG00000089243	r3hcc1l	R3H domain and coiled-coil containing 1-like [Source:ZFIN;Acc:ZDB-GENE-030131-4156]	http://zfin.org/ZDB-GENE-030131-4156	http://zfin.org/ZDB-GENE-030131-4156	0.000600145	-0.274663	0.07	0.15	2
ENSDARG00000101066	srp14	signal recognition particle 14 [Source:ZFIN;Acc:ZDB-GENE-050913-131]	http://zfin.org/ZDB-GENE-050913-131	http://zfin.org/ZDB-GENE-050913-131	0.00685704	-0.27453	0.14	0.217	2
ENSDARG00000077776	csnk2b	casein kinase 2, beta polypeptide [Source:ZFIN;Acc:ZDB-GENE-990415-29]	http://zfin.org/ZDB-GENE-990415-29	http://zfin.org/ZDB-GENE-990415-29	0.000535276	-0.274477	0.728	0.683	2
ENSDARG00000060697	kmt2bb	lysine (K)-specific methyltransferase 2Bb [Source:ZFIN;Acc:ZDB-GENE-080521-1]	http://zfin.org/ZDB-GENE-080521-1	http://zfin.org/ZDB-GENE-080521-1	0.0207864	-0.274384	0.237	0.367	2
ENSDARG00000002613	rpa3	replication protein A3 [Source:ZFIN;Acc:ZDB-GENE-040426-977]	http://zfin.org/ZDB-GENE-040426-977	http://zfin.org/ZDB-GENE-040426-977	0.00227099	-0.274219	0.158	0.25	2
ENSDARG00000075758	ywhabb	tyrosine 3-monooxygenase/tryptophan 5-monooxygenase activation protein, beta polypeptide b [Source:ZFIN;Acc:ZDB-GENE-040426-2160]	http://zfin.org/ZDB-GENE-040426-2160	http://zfin.org/ZDB-GENE-040426-2160	6.44123e-05	-0.273977	0.86	0.783	2
ENSDARG00000056801	sufu	suppressor of fused homolog (Drosophila) [Source:ZFIN;Acc:ZDB-GENE-030131-6223]	http://zfin.org/ZDB-GENE-030131-6223	http://zfin.org/ZDB-GENE-030131-6223	2.56293e-05	-0.273799	0.079	0.117	2
ENSDARG00000103403	sar1b	secretion associated, Ras related GTPase 1B [Source:ZFIN;Acc:ZDB-GENE-040426-1958]	http://zfin.org/ZDB-GENE-040426-1958	http://zfin.org/ZDB-GENE-040426-1958	2.23763e-06	-0.273772	0.246	0.283	2
ENSDARG00000037501	aasdhppt	aminoadipate-semialdehyde dehydrogenase-phosphopantetheinyl transferase [Source:ZFIN;Acc:ZDB-GENE-050913-36]	http://zfin.org/ZDB-GENE-050913-36	http://zfin.org/ZDB-GENE-050913-36	0.00149816	-0.273209	0.149	0.183	2
ENSDARG00000018968	acvr1ba	activin A receptor, type IBa [Source:ZFIN;Acc:ZDB-GENE-980526-527]	http://zfin.org/ZDB-GENE-980526-527	http://zfin.org/ZDB-GENE-980526-527	0.0212235	-0.272785	0.132	0.167	2
ENSDARG00000019525	tbcelb	tubulin folding cofactor E-like b [Source:ZFIN;Acc:ZDB-GENE-100921-13]	http://zfin.org/ZDB-GENE-100921-13	http://zfin.org/ZDB-GENE-100921-13	0.000853239	-0.272713	0.061	0.117	2
ENSDARG00000059804	fam134c	family with sequence similarity 134, member C [Source:ZFIN;Acc:ZDB-GENE-080520-1]	http://zfin.org/ZDB-GENE-080520-1	http://zfin.org/ZDB-GENE-080520-1	0.000758491	-0.271759	0.193	0.2	2
ENSDARG00000102873	CT956002.2		http://zfin.org/	http://zfin.org/	0.694421	-0.27132	0.105	0.167	2
ENSDARG00000076815	eif3s10	eukaryotic translation initiation factor 3, subunit 10 (theta) [Source:ZFIN;Acc:ZDB-GENE-030131-5726]	http://zfin.org/ZDB-GENE-030131-5726	http://zfin.org/ZDB-GENE-030131-5726	0.00215347	-0.271308	0.482	0.533	2
ENSDARG00000014047	cldn7b	claudin 7b [Source:ZFIN;Acc:ZDB-GENE-001103-5]	http://zfin.org/ZDB-GENE-001103-5	http://zfin.org/ZDB-GENE-001103-5	0.00011758	-0.27119	0.632	0.6	2
ENSDARG00000101144	zdhhc13	zinc finger, DHHC-type containing 13 [Source:ZFIN;Acc:ZDB-GENE-041212-79]	http://zfin.org/ZDB-GENE-041212-79	http://zfin.org/ZDB-GENE-041212-79	0.000164095	-0.270794	0.096	0.133	2
ENSDARG00000008947	rtf1	RTF1 homolog, Paf1/RNA polymerase II complex component [Source:ZFIN;Acc:ZDB-GENE-030131-6778]	http://zfin.org/ZDB-GENE-030131-6778	http://zfin.org/ZDB-GENE-030131-6778	0.000514255	-0.270354	0.281	0.383	2
ENSDARG00000005754	ptprfb	protein tyrosine phosphatase, receptor type, f, b [Source:ZFIN;Acc:ZDB-GENE-060503-530]	http://zfin.org/ZDB-GENE-060503-530	http://zfin.org/ZDB-GENE-060503-530	0.000465948	-0.270219	0.07	0.15	2
ENSDARG00000027112	ephb4b	eph receptor B4b [Source:ZFIN;Acc:ZDB-GENE-990415-65]	http://zfin.org/ZDB-GENE-990415-65	http://zfin.org/ZDB-GENE-990415-65	0.0164419	-0.270113	0.158	0.267	2
ENSDARG00000007257	rab5ab	RAB5A, member RAS oncogene family, b [Source:ZFIN;Acc:ZDB-GENE-040122-3]	http://zfin.org/ZDB-GENE-040122-3	http://zfin.org/ZDB-GENE-040122-3	3.92466e-06	-0.269989	0.36	0.35	2
ENSDARG00000043680	ylpm1	YLP motif containing 1 [Source:ZFIN;Acc:ZDB-GENE-030131-2196]	http://zfin.org/ZDB-GENE-030131-2196	http://zfin.org/ZDB-GENE-030131-2196	3.1201e-05	-0.269692	0.14	0.2	2
ENSDARG00000026723	syncripl	synaptotagmin binding, cytoplasmic RNA interacting protein, like [Source:ZFIN;Acc:ZDB-GENE-030131-3104]	http://zfin.org/ZDB-GENE-030131-3104	http://zfin.org/ZDB-GENE-030131-3104	0.00586792	-0.269585	0.018	0.15	2
ENSDARG00000099458	ddx46	DEAD (Asp-Glu-Ala-Asp) box polypeptide 46 [Source:ZFIN;Acc:ZDB-GENE-030131-667]	http://zfin.org/ZDB-GENE-030131-667	http://zfin.org/ZDB-GENE-030131-667	0.00709489	-0.269529	0.158	0.233	2
ENSDARG00000069425	hsbp1a	heat shock factor binding protein 1a [Source:ZFIN;Acc:ZDB-GENE-050320-136]	http://zfin.org/ZDB-GENE-050320-136	http://zfin.org/ZDB-GENE-050320-136	7.62001e-05	-0.269467	0.675	0.583	2
ENSDARG00000099143	fnta	farnesyltransferase, CAAX box, alpha [Source:ZFIN;Acc:ZDB-GENE-030131-866]	http://zfin.org/ZDB-GENE-030131-866	http://zfin.org/ZDB-GENE-030131-866	0.0487704	-0.269154	0.061	0.15	2
ENSDARG00000016691	cd9b	CD9 molecule b [Source:ZFIN;Acc:ZDB-GENE-040426-2768]	http://zfin.org/ZDB-GENE-040426-2768	http://zfin.org/ZDB-GENE-040426-2768	0.0112942	-0.269017	0.491	0.567	2
ENSDARG00000011958	ctnnbl1	catenin, beta like 1 [Source:ZFIN;Acc:ZDB-GENE-040426-1850]	http://zfin.org/ZDB-GENE-040426-1850	http://zfin.org/ZDB-GENE-040426-1850	9.60783e-08	-0.268672	0.158	0.2	2
ENSDARG00000030108	sec22ba	SEC22 homolog B, vesicle trafficking protein a [Source:ZFIN;Acc:ZDB-GENE-010724-3]	http://zfin.org/ZDB-GENE-010724-3	http://zfin.org/ZDB-GENE-010724-3	0.000341198	-0.268561	0.044	0.117	2
ENSDARG00000040910	ildr1b	immunoglobulin-like domain containing receptor 1b [Source:ZFIN;Acc:ZDB-GENE-040912-72]	http://zfin.org/ZDB-GENE-040912-72	http://zfin.org/ZDB-GENE-040912-72	0.000919089	-0.268559	0.219	0.35	2
ENSDARG00000026540	ppp4r2a	protein phosphatase 4, regulatory subunit 2a [Source:ZFIN;Acc:ZDB-GENE-030131-4922]	http://zfin.org/ZDB-GENE-030131-4922	http://zfin.org/ZDB-GENE-030131-4922	0.000152524	-0.268239	0.035	0.183	2
ENSDARG00000006235	brms1la	breast cancer metastasis-suppressor 1-like a [Source:ZFIN;Acc:ZDB-GENE-050913-49]	http://zfin.org/ZDB-GENE-050913-49	http://zfin.org/ZDB-GENE-050913-49	0.00250177	-0.267952	0.061	0.217	2
ENSDARG00000042147	rbbp5	retinoblastoma binding protein 5 [Source:ZFIN;Acc:ZDB-GENE-040426-886]	http://zfin.org/ZDB-GENE-040426-886	http://zfin.org/ZDB-GENE-040426-886	5.61796e-08	-0.267494	0.175	0.25	2
ENSDARG00000103871	si:ch73-109d9.2	si:ch73-109d9.2 [Source:ZFIN;Acc:ZDB-GENE-030131-5611]	http://zfin.org/ZDB-GENE-030131-5611	http://zfin.org/ZDB-GENE-030131-5611	0.00127302	-0.267275	0.044	0.167	2
ENSDARG00000005230	ssr2	signal sequence receptor, beta [Source:ZFIN;Acc:ZDB-GENE-010413-1]	http://zfin.org/ZDB-GENE-010413-1	http://zfin.org/ZDB-GENE-010413-1	0.00078324	-0.26715	0.395	0.467	2
ENSDARG00000035129	zgc:101858	zgc:101858 [Source:ZFIN;Acc:ZDB-GENE-040927-13]	http://zfin.org/ZDB-GENE-040927-13	http://zfin.org/ZDB-GENE-040927-13	0.0604178	-0.266968	0.123	0.283	2
ENSDARG00000038900	acadm	acyl-CoA dehydrogenase, C-4 to C-12 straight chain [Source:ZFIN;Acc:ZDB-GENE-040426-1945]	http://zfin.org/ZDB-GENE-040426-1945	http://zfin.org/ZDB-GENE-040426-1945	0.0414056	-0.266624	0.412	0.517	2
ENSDARG00000019326	prpsap2	phosphoribosyl pyrophosphate synthetase-associated protein 2 [Source:ZFIN;Acc:ZDB-GENE-040426-2077]	http://zfin.org/ZDB-GENE-040426-2077	http://zfin.org/ZDB-GENE-040426-2077	0.00641135	-0.266591	0.096	0.133	2
ENSDARG00000062590	pleca	plectin a [Source:ZFIN;Acc:ZDB-GENE-030131-8984]	http://zfin.org/ZDB-GENE-030131-8984	http://zfin.org/ZDB-GENE-030131-8984	0.0289381	-0.266421	0.123	0.3	2
ENSDARG00000100169	BX323573.2		http://zfin.org/	http://zfin.org/	0.0151342	-0.266261	0.009	0.133	2
ENSDARG00000079175	si:ch211-79k12.1	si:ch211-79k12.1 [Source:ZFIN;Acc:ZDB-GENE-080303-9]	http://zfin.org/ZDB-GENE-080303-9	http://zfin.org/ZDB-GENE-080303-9	0.00175249	-0.266215	0.061	0.133	2
ENSDARG00000040620	psmg1	proteasome (prosome, macropain) assembly chaperone 1 [Source:ZFIN;Acc:ZDB-GENE-040718-469]	http://zfin.org/ZDB-GENE-040718-469	http://zfin.org/ZDB-GENE-040718-469	0.00163985	-0.266131	0.193	0.3	2
ENSDARG00000102105	dad1	defender against cell death 1 [Source:ZFIN;Acc:ZDB-GENE-060503-233]	http://zfin.org/ZDB-GENE-060503-233	http://zfin.org/ZDB-GENE-060503-233	0.000562716	-0.265591	0.746	0.683	2
ENSDARG00000098832	fam168a	family with sequence similarity 168, member A [Source:ZFIN;Acc:ZDB-GENE-060825-128]	http://zfin.org/ZDB-GENE-060825-128	http://zfin.org/ZDB-GENE-060825-128	0.00272778	-0.265479	0.228	0.283	2
ENSDARG00000069850	mrpl30	mitochondrial ribosomal protein L30 [Source:ZFIN;Acc:ZDB-GENE-050522-240]	http://zfin.org/ZDB-GENE-050522-240	http://zfin.org/ZDB-GENE-050522-240	0.0123715	-0.265163	0.281	0.433	2
ENSDARG00000068128	ppp1r15b	protein phosphatase 1, regulatory subunit 15B [Source:ZFIN;Acc:ZDB-GENE-030829-40]	http://zfin.org/ZDB-GENE-030829-40	http://zfin.org/ZDB-GENE-030829-40	0.00314511	-0.264955	0.035	0.133	2
ENSDARG00000052025	pomgnt1	protein O-linked mannose N-acetylglucosaminyltransferase 1 (beta 1,2-) [Source:ZFIN;Acc:ZDB-GENE-070112-991]	http://zfin.org/ZDB-GENE-070112-991	http://zfin.org/ZDB-GENE-070112-991	0.000207177	-0.264869	0.088	0.167	2
ENSDARG00000036698	znf865	zinc finger protein 865 [Source:ZFIN;Acc:ZDB-GENE-060503-896]	http://zfin.org/ZDB-GENE-060503-896	http://zfin.org/ZDB-GENE-060503-896	5.43222e-05	-0.264678	0.096	0.233	2
ENSDARG00000098466	ube2a	ubiquitin-conjugating enzyme E2A (RAD6 homolog) [Source:ZFIN;Acc:ZDB-GENE-030616-72]	http://zfin.org/ZDB-GENE-030616-72	http://zfin.org/ZDB-GENE-030616-72	0.0250299	-0.264065	0.535	0.583	2
ENSDARG00000060199	mrpl18	mitochondrial ribosomal protein L18 [Source:ZFIN;Acc:ZDB-GENE-061013-632]	http://zfin.org/ZDB-GENE-061013-632	http://zfin.org/ZDB-GENE-061013-632	0.000137706	-0.264005	0.36	0.383	2
ENSDARG00000010596	slc7a6os	solute carrier family 7, member 6 opposite strand [Source:ZFIN;Acc:ZDB-GENE-041114-32]	http://zfin.org/ZDB-GENE-041114-32	http://zfin.org/ZDB-GENE-041114-32	0.00101753	-0.263278	0.325	0.35	2
ENSDARG00000014770	usp4	ubiquitin specific peptidase 4 (proto-oncogene) [Source:ZFIN;Acc:ZDB-GENE-041008-187]	http://zfin.org/ZDB-GENE-041008-187	http://zfin.org/ZDB-GENE-041008-187	0.000113782	-0.263109	0.079	0.15	2
ENSDARG00000033596	polr2c	polymerase (RNA) II (DNA directed) polypeptide C [Source:ZFIN;Acc:ZDB-GENE-030131-6609]	http://zfin.org/ZDB-GENE-030131-6609	http://zfin.org/ZDB-GENE-030131-6609	9.63602e-06	-0.26267	0.211	0.333	2
ENSDARG00000099614	purab	purine-rich element binding protein Ab [Source:ZFIN;Acc:ZDB-GENE-141216-78]	http://zfin.org/ZDB-GENE-141216-78	http://zfin.org/ZDB-GENE-141216-78	0.00135099	-0.262652	0.325	0.35	2
ENSDARG00000021483	cdc14b	cell division cycle 14B [Source:ZFIN;Acc:ZDB-GENE-040426-820]	http://zfin.org/ZDB-GENE-040426-820	http://zfin.org/ZDB-GENE-040426-820	8.19313e-05	-0.262644	0.272	0.283	2
ENSDARG00000002792	arcn1a	archain 1a [Source:ZFIN;Acc:ZDB-GENE-021031-2]	http://zfin.org/ZDB-GENE-021031-2	http://zfin.org/ZDB-GENE-021031-2	8.98031e-09	-0.262432	0.298	0.317	2
ENSDARG00000053370	eif3jb	eukaryotic translation initiation factor 3, subunit Jb [Source:ZFIN;Acc:ZDB-GENE-040426-2900]	http://zfin.org/ZDB-GENE-040426-2900	http://zfin.org/ZDB-GENE-040426-2900	0.0833337	-0.262146	0.421	0.5	2
ENSDARG00000039345	drg1	developmentally regulated GTP binding protein 1 [Source:ZFIN;Acc:ZDB-GENE-030131-8767]	http://zfin.org/ZDB-GENE-030131-8767	http://zfin.org/ZDB-GENE-030131-8767	0.000598854	-0.262125	0.149	0.267	2
ENSDARG00000075545	si:dkey-89b17.4	si:dkey-89b17.4 [Source:ZFIN;Acc:ZDB-GENE-030131-8215]	http://zfin.org/ZDB-GENE-030131-8215	http://zfin.org/ZDB-GENE-030131-8215	0.0566729	-0.262048	0.07	0.133	2
ENSDARG00000037835	polr3k	polymerase (RNA) III (DNA directed) polypeptide K [Source:ZFIN;Acc:ZDB-GENE-040718-291]	http://zfin.org/ZDB-GENE-040718-291	http://zfin.org/ZDB-GENE-040718-291	0.00270624	-0.261804	0.149	0.25	2
ENSDARG00000016754	tbca	tubulin cofactor a [Source:ZFIN;Acc:ZDB-GENE-040426-962]	http://zfin.org/ZDB-GENE-040426-962	http://zfin.org/ZDB-GENE-040426-962	4.52881e-06	-0.261632	0.658	0.6	2
ENSDARG00000044669	hp1bp3	heterochromatin protein 1, binding protein 3 [Source:ZFIN;Acc:ZDB-GENE-060810-79]	http://zfin.org/ZDB-GENE-060810-79	http://zfin.org/ZDB-GENE-060810-79	0.00803724	-0.261623	0.561	0.6	2
ENSDARG00000003994	syt9a	synaptotagmin IXa [Source:ZFIN;Acc:ZDB-GENE-031002-18]	http://zfin.org/ZDB-GENE-031002-18	http://zfin.org/ZDB-GENE-031002-18	0.0027172	-0.261573	0.018	0.117	2
ENSDARG00000038615	tmem55ba	transmembrane protein 55Ba [Source:ZFIN;Acc:ZDB-GENE-051113-312]	http://zfin.org/ZDB-GENE-051113-312	http://zfin.org/ZDB-GENE-051113-312	0.00121193	-0.261561	0.193	0.25	2
ENSDARG00000018618	cpsf6	cleavage and polyadenylation specific factor 6 [Source:ZFIN;Acc:ZDB-GENE-030131-5277]	http://zfin.org/ZDB-GENE-030131-5277	http://zfin.org/ZDB-GENE-030131-5277	1.0466e-05	-0.261546	0.439	0.4	2
ENSDARG00000004706	syf2	SYF2 pre-mRNA-splicing factor [Source:ZFIN;Acc:ZDB-GENE-040801-170]	http://zfin.org/ZDB-GENE-040801-170	http://zfin.org/ZDB-GENE-040801-170	0.00205319	-0.261125	0.649	0.667	2
ENSDARG00000005945	sart1	squamous cell carcinoma antigen recognised by T cells [Source:ZFIN;Acc:ZDB-GENE-040718-422]	http://zfin.org/ZDB-GENE-040718-422	http://zfin.org/ZDB-GENE-040718-422	0.0025304	-0.25996	0.342	0.383	2
ENSDARG00000104611	zgc:173517	zgc:173517 [Source:ZFIN;Acc:ZDB-GENE-071004-104]	http://zfin.org/ZDB-GENE-071004-104	http://zfin.org/ZDB-GENE-071004-104	0.0179681	-0.259901	0.009	0.133	2
ENSDARG00000026767	nol11	nucleolar protein 11 [Source:ZFIN;Acc:ZDB-GENE-030131-419]	http://zfin.org/ZDB-GENE-030131-419	http://zfin.org/ZDB-GENE-030131-419	0.000832884	-0.259403	0.132	0.217	2
ENSDARG00000007795	cst3	cystatin C (amyloid angiopathy and cerebral hemorrhage) [Source:ZFIN;Acc:ZDB-GENE-030131-373]	http://zfin.org/ZDB-GENE-030131-373	http://zfin.org/ZDB-GENE-030131-373	0.00630435	-0.259328	0.132	0.25	2
ENSDARG00000011611	actr1	ARP1 actin-related protein 1, centractin (yeast) [Source:ZFIN;Acc:ZDB-GENE-040426-2695]	http://zfin.org/ZDB-GENE-040426-2695	http://zfin.org/ZDB-GENE-040426-2695	8.55248e-05	-0.259303	0.342	0.383	2
ENSDARG00000026369	dbi	diazepam binding inhibitor (GABA receptor modulator, acyl-CoA binding protein) [Source:ZFIN;Acc:ZDB-GENE-040426-1861]	http://zfin.org/ZDB-GENE-040426-1861	http://zfin.org/ZDB-GENE-040426-1861	0.00689501	-0.259248	0.579	0.65	2
ENSDARG00000056722	cd99l2	CD99 molecule-like 2 [Source:ZFIN;Acc:ZDB-GENE-030131-1986]	http://zfin.org/ZDB-GENE-030131-1986	http://zfin.org/ZDB-GENE-030131-1986	2.50619e-06	-0.259151	0.412	0.35	2
ENSDARG00000054272	caprin1b	cell cycle associated protein 1b [Source:ZFIN;Acc:ZDB-GENE-040426-2020]	http://zfin.org/ZDB-GENE-040426-2020	http://zfin.org/ZDB-GENE-040426-2020	0.00692418	-0.259138	0.211	0.3	2
ENSDARG00000101259	hgh1	HGH1 homolog (S. cerevisiae) [Source:ZFIN;Acc:ZDB-GENE-040718-228]	http://zfin.org/ZDB-GENE-040718-228	http://zfin.org/ZDB-GENE-040718-228	0.000439209	-0.259131	0.026	0.15	2
ENSDARG00000053685	gtf2a2	general transcription factor IIA, 2 [Source:ZFIN;Acc:ZDB-GENE-050522-513]	http://zfin.org/ZDB-GENE-050522-513	http://zfin.org/ZDB-GENE-050522-513	0.0014051	-0.258765	0.158	0.233	2
ENSDARG00000030161	ppp1r14bb	protein phosphatase 1, regulatory (inhibitor) subunit 14Bb [Source:ZFIN;Acc:ZDB-GENE-030616-595]	http://zfin.org/ZDB-GENE-030616-595	http://zfin.org/ZDB-GENE-030616-595	0.00918018	-0.25874	0.018	0.133	2
ENSDARG00000035167	mrpl48	mitochondrial ribosomal protein L48 [Source:ZFIN;Acc:ZDB-GENE-041008-125]	http://zfin.org/ZDB-GENE-041008-125	http://zfin.org/ZDB-GENE-041008-125	0.0715159	-0.258458	0.149	0.25	2
ENSDARG00000077751	nol9	nucleolar protein 9 [Source:ZFIN;Acc:ZDB-GENE-070629-1]	http://zfin.org/ZDB-GENE-070629-1	http://zfin.org/ZDB-GENE-070629-1	0.00477353	-0.258396	0.044	0.15	2
ENSDARG00000057007	ctbp1	C-terminal binding protein 1 [Source:ZFIN;Acc:ZDB-GENE-010130-1]	http://zfin.org/ZDB-GENE-010130-1	http://zfin.org/ZDB-GENE-010130-1	0.16799	-0.257891	0.132	0.217	2
ENSDARG00000059816	zgc:136864	zgc:136864 [Source:ZFIN;Acc:ZDB-GENE-060331-129]	http://zfin.org/ZDB-GENE-060331-129	http://zfin.org/ZDB-GENE-060331-129	0.000181782	-0.257682	0.377	0.35	2
ENSDARG00000099283	epb41a	erythrocyte membrane protein band 4.1a [Source:ZFIN;Acc:ZDB-GENE-070705-81]	http://zfin.org/ZDB-GENE-070705-81	http://zfin.org/ZDB-GENE-070705-81	0.000215085	-0.25745	0.026	0.167	2
ENSDARG00000036500	fam122b	family with sequence similarity 122B [Source:ZFIN;Acc:ZDB-GENE-040801-204]	http://zfin.org/ZDB-GENE-040801-204	http://zfin.org/ZDB-GENE-040801-204	0.000141295	-0.257348	0.114	0.183	2
ENSDARG00000003287	wdr12	WD repeat domain 12 [Source:ZFIN;Acc:ZDB-GENE-030131-371]	http://zfin.org/ZDB-GENE-030131-371	http://zfin.org/ZDB-GENE-030131-371	0.00603411	-0.257165	0.079	0.2	2
ENSDARG00000102874	immt	inner membrane protein, mitochondrial (mitofilin) [Source:ZFIN;Acc:ZDB-GENE-030131-5417]	http://zfin.org/ZDB-GENE-030131-5417	http://zfin.org/ZDB-GENE-030131-5417	0.00669323	-0.256876	0.298	0.35	2
ENSDARG00000070834	taf13	TAF13 RNA polymerase II, TATA box binding protein (TBP)-associated factor [Source:ZFIN;Acc:ZDB-GENE-030131-2873]	http://zfin.org/ZDB-GENE-030131-2873	http://zfin.org/ZDB-GENE-030131-2873	0.000207618	-0.256855	0.526	0.5	2
ENSDARG00000026476	tia1l	cytotoxic granule-associated RNA binding protein 1, like [Source:ZFIN;Acc:ZDB-GENE-030131-2167]	http://zfin.org/ZDB-GENE-030131-2167	http://zfin.org/ZDB-GENE-030131-2167	0.0175923	-0.256011	0.246	0.383	2
ENSDARG00000059303	hnrnpl2	heterogeneous nuclear ribonucleoprotein L2 [Source:ZFIN;Acc:ZDB-GENE-040426-2707]	http://zfin.org/ZDB-GENE-040426-2707	http://zfin.org/ZDB-GENE-040426-2707	0.00242689	-0.25596	0.43	0.45	2
ENSDARG00000017843	srsf1b	serine/arginine-rich splicing factor 1b [Source:ZFIN;Acc:ZDB-GENE-040426-1467]	http://zfin.org/ZDB-GENE-040426-1467	http://zfin.org/ZDB-GENE-040426-1467	0.00310028	-0.255492	0.439	0.45	2
ENSDARG00000100519	spop	speckle-type POZ protein [Source:ZFIN;Acc:ZDB-GENE-040426-1378]	http://zfin.org/ZDB-GENE-040426-1378	http://zfin.org/ZDB-GENE-040426-1378	0.00633921	-0.255404	0.061	0.217	2
ENSDARG00000102975	hmp19	HMP19 protein [Source:ZFIN;Acc:ZDB-GENE-030131-3694]	http://zfin.org/ZDB-GENE-030131-3694	http://zfin.org/ZDB-GENE-030131-3694	0.118341	-0.255167	0.044	0.117	2
ENSDARG00000028894	mrgbp	MRG/MORF4L binding protein [Source:ZFIN;Acc:ZDB-GENE-040426-1698]	http://zfin.org/ZDB-GENE-040426-1698	http://zfin.org/ZDB-GENE-040426-1698	0.00205943	-0.254957	0.132	0.217	2
ENSDARG00000089861	usp44	ubiquitin specific peptidase 44 [Source:ZFIN;Acc:ZDB-GENE-040426-774]	http://zfin.org/ZDB-GENE-040426-774	http://zfin.org/ZDB-GENE-040426-774	0.027978	-0.254805	0.07	0.217	2
ENSDARG00000070164	ubr2	ubiquitin protein ligase E3 component n-recognin 2 [Source:ZFIN;Acc:ZDB-GENE-081107-29]	http://zfin.org/ZDB-GENE-081107-29	http://zfin.org/ZDB-GENE-081107-29	0.00275203	-0.254589	0.018	0.167	2
ENSDARG00000099291	lsr	lipolysis stimulated lipoprotein receptor [Source:ZFIN;Acc:ZDB-GENE-050913-73]	http://zfin.org/ZDB-GENE-050913-73	http://zfin.org/ZDB-GENE-050913-73	0.073539	-0.254535	0.263	0.45	2
ENSDARG00000031317	ppdpfb	pancreatic progenitor cell differentiation and proliferation factor b [Source:ZFIN;Acc:ZDB-GENE-030131-8247]	http://zfin.org/ZDB-GENE-030131-8247	http://zfin.org/ZDB-GENE-030131-8247	0.0161762	-0.254331	0.684	0.683	2
ENSDARG00000036245	WIPF3	sb:cb649 [Source:ZFIN;Acc:ZDB-GENE-030804-15]	http://zfin.org/ZDB-GENE-030804-15	http://zfin.org/ZDB-GENE-030804-15	0.00407597	-0.25425	0.219	0.333	2
ENSDARG00000056160	hspd1	heat shock 60 protein 1 [Source:ZFIN;Acc:ZDB-GENE-021206-1]	http://zfin.org/ZDB-GENE-021206-1	http://zfin.org/ZDB-GENE-021206-1	0.0352742	-0.253868	0.123	0.2	2
ENSDARG00000043972	ppp2r3c	protein phosphatase 2, regulatory subunit B'', gamma [Source:ZFIN;Acc:ZDB-GENE-040426-715]	http://zfin.org/ZDB-GENE-040426-715	http://zfin.org/ZDB-GENE-040426-715	0.000518895	-0.253804	0.158	0.267	2
ENSDARG00000070833	lin52	lin-52 DREAM MuvB core complex component [Source:ZFIN;Acc:ZDB-GENE-061110-82]	http://zfin.org/ZDB-GENE-061110-82	http://zfin.org/ZDB-GENE-061110-82	0.0696918	-0.253607	0.175	0.333	2
ENSDARG00000055524	rnf7	ring finger protein 7 [Source:ZFIN;Acc:ZDB-GENE-050220-12]	http://zfin.org/ZDB-GENE-050220-12	http://zfin.org/ZDB-GENE-050220-12	0.0294335	-0.253534	0.491	0.583	2
ENSDARG00000016514	gtf2h2	general transcription factor IIH, polypeptide 2 [Source:ZFIN;Acc:ZDB-GENE-030131-1959]	http://zfin.org/ZDB-GENE-030131-1959	http://zfin.org/ZDB-GENE-030131-1959	0.000754911	-0.253196	0.018	0.15	2
ENSDARG00000023532	pinx1	PIN2/TERF1 interacting, telomerase inhibitor 1 [Source:ZFIN;Acc:ZDB-GENE-030515-2]	http://zfin.org/ZDB-GENE-030515-2	http://zfin.org/ZDB-GENE-030515-2	0.0203051	-0.252781	0.088	0.2	2
ENSDARG00000029107	ube2d1a	ubiquitin-conjugating enzyme E2D 1a [Source:ZFIN;Acc:ZDB-GENE-040426-1609]	http://zfin.org/ZDB-GENE-040426-1609	http://zfin.org/ZDB-GENE-040426-1609	0.0269354	-0.252657	0.219	0.35	2
ENSDARG00000060282	rnf121	ring finger protein 121 [Source:ZFIN;Acc:ZDB-GENE-050809-3]	http://zfin.org/ZDB-GENE-050809-3	http://zfin.org/ZDB-GENE-050809-3	0.00827554	-0.25258	0.132	0.25	2
ENSDARG00000021557	wdr45b	WD repeat domain 45B [Source:ZFIN;Acc:ZDB-GENE-040426-863]	http://zfin.org/ZDB-GENE-040426-863	http://zfin.org/ZDB-GENE-040426-863	0.0603875	-0.252433	0.105	0.15	2
ENSDARG00000075883	bub3	BUB3 mitotic checkpoint protein [Source:ZFIN;Acc:ZDB-GENE-041010-210]	http://zfin.org/ZDB-GENE-041010-210	http://zfin.org/ZDB-GENE-041010-210	0.00501818	-0.252331	0.123	0.3	2
ENSDARG00000029818	srsf5a	serine/arginine-rich splicing factor 5a [Source:ZFIN;Acc:ZDB-GENE-030131-7336]	http://zfin.org/ZDB-GENE-030131-7336	http://zfin.org/ZDB-GENE-030131-7336	0.0048429	-0.252148	0.86	0.817	2
ENSDARG00000078433	spc25	SPC25, NDC80 kinetochore complex component, homolog (S. cerevisiae) [Source:ZFIN;Acc:ZDB-GENE-060810-13]	http://zfin.org/ZDB-GENE-060810-13	http://zfin.org/ZDB-GENE-060810-13	0.0337033	-0.251919	0.009	0.117	2
ENSDARG00000074319	sall1a	spalt-like transcription factor 1a [Source:ZFIN;Acc:ZDB-GENE-020228-2]	http://zfin.org/ZDB-GENE-020228-2	http://zfin.org/ZDB-GENE-020228-2	4.61888e-05	-0.251872	0.342	0.317	2
ENSDARG00000045444	fzd8a	frizzled class receptor 8a [Source:ZFIN;Acc:ZDB-GENE-000328-3]	http://zfin.org/ZDB-GENE-000328-3	http://zfin.org/ZDB-GENE-000328-3	0.000872169	-0.250997	0.07	0.117	2
ENSDARG00000102571	metap2b	methionyl aminopeptidase 2b [Source:ZFIN;Acc:ZDB-GENE-030131-2172]	http://zfin.org/ZDB-GENE-030131-2172	http://zfin.org/ZDB-GENE-030131-2172	0.0217388	-0.250756	0.377	0.417	2
ENSDARG00000058734	prdx1	peroxiredoxin 1 [Source:ZFIN;Acc:ZDB-GENE-050320-35]	http://zfin.org/ZDB-GENE-050320-35	http://zfin.org/ZDB-GENE-050320-35	0.118094	-0.250738	0.693	0.65	2
ENSDARG00000068305	mrps14	mitochondrial ribosomal protein S14 [Source:ZFIN;Acc:ZDB-GENE-060825-75]	http://zfin.org/ZDB-GENE-060825-75	http://zfin.org/ZDB-GENE-060825-75	0.000710628	-0.250516	0.377	0.433	2
ENSDARG00000028614	mospd1	motile sperm domain containing 1 [Source:ZFIN;Acc:ZDB-GENE-040426-2691]	http://zfin.org/ZDB-GENE-040426-2691	http://zfin.org/ZDB-GENE-040426-2691	0.00131659	-0.250445	0.167	0.267	2
ENSDARG00000040158	cdc42l	cell division cycle 42, like [Source:ZFIN;Acc:ZDB-GENE-030131-6069]	http://zfin.org/ZDB-GENE-030131-6069	http://zfin.org/ZDB-GENE-030131-6069	0.00334565	-0.250016	0.272	0.3	2

## Sheet: node18_vs_node19
p_val	avg_logFC	pct.1	pct.2	p_val_adj	Gene.name.uniq	Ensembl.Gene.ID	Associated.Gene.Name	ZFIN.ID	Description
6.59623e-109	1.98922	0.747	0.1	1.02129e-104	tspan1	ENSDARG00000052027	tspan1	https://zfin.org/ZDB-GENE-070502-5	tetraspanin 1 [Source:ZFIN;Acc:ZDB-GENE-070502-5]
3.04058e-88	1.69509	0.951	0.4	4.70773e-84	tfap2a	ENSDARG00000059279	tfap2a	https://zfin.org/ZDB-GENE-011212-6	transcription factor AP-2 alpha [Source:ZFIN;Acc:ZDB-GENE-011212-6]
3.23106e-88	1.92323	0.989	0.812	5.00265e-84	wu:fj16a03	ENSDARG00000100952	wu:fj16a03	https://zfin.org/	wu:fj16a03 [Source:EntrezGene;Acc:335475]
4.85448e-66	2.06063	0.527	0.081	7.5162e-62	crip1	ENSDARG00000053858	crip1	https://zfin.org/ZDB-GENE-041111-1	cysteine-rich protein 1 [Source:ZFIN;Acc:ZDB-GENE-041111-1]
3.72613e-63	1.33786	0.462	0.056	5.76917e-59	ponzr6	ENSDARG00000036382	ponzr6	https://zfin.org/ZDB-GENE-081104-326	plac8 onzin related protein 6 [Source:ZFIN;Acc:ZDB-GENE-081104-326]
1.78986e-60	1.22741	0.346	0.024	2.77124e-56	tnfsf10	ENSDARG00000057241	tnfsf10	https://zfin.org/ZDB-GENE-040718-335	tumor necrosis factor (ligand) superfamily, member 10 [Source:ZFIN;Acc:ZDB-GENE-040718-335]
1.04569e-53	1.49521	0.473	0.078	1.61904e-49	pkhd1l1	ENSDARG00000091116	pkhd1l1	https://zfin.org/ZDB-GENE-060503-475	polycystic kidney and hepatic disease 1 (autosomal recessive)-like 1 [Source:ZFIN;Acc:ZDB-GENE-060503-475]
4.54099e-53	0.712692	1	1	7.03082e-49	pvalb8	ENSDARG00000037790	pvalb8	https://zfin.org/ZDB-GENE-030805-3	parvalbumin 8 [Source:ZFIN;Acc:ZDB-GENE-030805-3]
4.53626e-49	0.675042	1	1	7.02349e-45	malat1	ENSDARG00000099970	malat1	https://zfin.org/ZDB-GENE-141216-248	metastasis associated lung adenocarcinoma transcript 1 [Source:ZFIN;Acc:ZDB-GENE-141216-248]
3.11956e-48	1.40046	0.33	0.033	4.83001e-44	cldne	ENSDARG00000043128	cldne	https://zfin.org/ZDB-GENE-010328-5	claudin e [Source:ZFIN;Acc:ZDB-GENE-010328-5]
1.55669e-46	1.87282	0.346	0.042	2.41022e-42	cts12	ENSDARG00000042753	cts12	https://zfin.org/ZDB-GENE-050208-336	cathepsin 12 [Source:ZFIN;Acc:ZDB-GENE-050208-336]
9.53706e-46	1.32725	0.841	0.541	1.47662e-41	hopx	ENSDARG00000089368	hopx	https://zfin.org/ZDB-GENE-031016-2	HOP homeobox [Source:ZFIN;Acc:ZDB-GENE-031016-2]
1.19259e-42	1.40238	0.407	0.072	1.84648e-38	si:ch211-266a5.12	ENSDARG00000092714	si:ch211-266a5.12	https://zfin.org/ZDB-GENE-081104-210	si:ch211-266a5.12 [Source:ZFIN;Acc:ZDB-GENE-081104-210]
2.19689e-40	0.553048	0.995	0.994	3.40145e-36	epcam	ENSDARG00000040534	epcam	https://zfin.org/ZDB-GENE-040426-2209	epithelial cell adhesion molecule [Source:ZFIN;Acc:ZDB-GENE-040426-2209]
3.48962e-40	1.11303	0.401	0.075	5.40298e-36	mal	ENSDARG00000030094	mal	https://zfin.org/ZDB-GENE-050417-175	mal, T-cell differentiation protein [Source:ZFIN;Acc:ZDB-GENE-050417-175]
1.57851e-35	0.87514	0.198	0.012	2.44401e-31	sulf1	ENSDARG00000038428	sulf1	https://zfin.org/ZDB-GENE-030131-9242	sulfatase 1 [Source:ZFIN;Acc:ZDB-GENE-030131-9242]
1.67571e-34	1.34499	0.462	0.129	2.59451e-30	igfbp5b	ENSDARG00000025348	igfbp5b	https://zfin.org/ZDB-GENE-040319-2	insulin-like growth factor binding protein 5b [Source:ZFIN;Acc:ZDB-GENE-040319-2]
3.66147e-34	0.782595	0.269	0.033	5.66905e-30	mcama	ENSDARG00000089643	mcama	https://zfin.org/ZDB-GENE-090218-29	melanoma cell adhesion molecule a [Source:ZFIN;Acc:ZDB-GENE-090218-29]
1.31927e-33	0.96207	0.736	0.397	2.04262e-29	cdh1	ENSDARG00000102750	cdh1	https://zfin.org/ZDB-GENE-010606-1	cadherin 1, type 1, E-cadherin (epithelial) [Source:ZFIN;Acc:ZDB-GENE-010606-1]
7.55742e-33	0.854347	0.198	0.015	1.17012e-28	rgs4	ENSDARG00000070047	rgs4	https://zfin.org/ZDB-GENE-030131-9839	regulator of G-protein signaling 4 [Source:ZFIN;Acc:ZDB-GENE-030131-9839]
2.47918e-32	0.7474	0.181	0.011	3.83851e-28	sfrp1a	ENSDARG00000035521	sfrp1a	https://zfin.org/ZDB-GENE-040310-5	secreted frizzled-related protein 1a [Source:ZFIN;Acc:ZDB-GENE-040310-5]
3.12231e-28	0.540346	0.973	0.956	4.83427e-24	si:dkey-222f2.1	ENSDARG00000043242	si:dkey-222f2.1	https://zfin.org/ZDB-GENE-050208-726	si:dkey-222f2.1 [Source:ZFIN;Acc:ZDB-GENE-050208-726]
1.3046e-27	0.828498	0.28	0.051	2.01991e-23	tmem119b	ENSDARG00000068036	tmem119b	https://zfin.org/ZDB-GENE-070410-49	transmembrane protein 119b [Source:ZFIN;Acc:ZDB-GENE-070410-49]
1.70611e-27	1.33692	0.637	0.343	2.64157e-23	txn	ENSDARG00000044125	txn	https://zfin.org/ZDB-GENE-040718-162	thioredoxin [Source:ZFIN;Acc:ZDB-GENE-040718-162]
9.10449e-27	0.944075	0.22	0.029	1.40965e-22	lye	ENSDARG00000100630	lye	https://zfin.org/ZDB-GENE-120104-1	lymphocyte antigen-6, epidermis [Source:ZFIN;Acc:ZDB-GENE-120104-1]
3.57314e-25	0.666877	0.918	0.891	5.53229e-21	cldnh	ENSDARG00000069503	cldnh	https://zfin.org/ZDB-GENE-010328-8	claudin h [Source:ZFIN;Acc:ZDB-GENE-010328-8]
6.58458e-25	0.70487	0.896	0.753	1.01949e-20	net1	ENSDARG00000032765	net1	https://zfin.org/ZDB-GENE-041121-18	neuroepithelial cell transforming 1 [Source:ZFIN;Acc:ZDB-GENE-041121-18]
1.01213e-24	0.589412	0.929	0.904	1.56709e-20	krt1-c5	ENSDARG00000026979	krt1-c5	https://zfin.org/ZDB-GENE-060316-3	keratin, type 1, gene c5 [Source:ZFIN;Acc:ZDB-GENE-060316-3]
1.0273e-24	0.876922	0.291	0.064	1.59057e-20	map7d3	ENSDARG00000060771	map7d3	https://zfin.org/ZDB-GENE-121129-3	MAP7 domain containing 3 [Source:ZFIN;Acc:ZDB-GENE-121129-3]
8.63969e-24	1.0132	0.698	0.43	1.33768e-19	si:dkey-247k7.2	ENSDARG00000103199	si:dkey-247k7.2	https://zfin.org/ZDB-GENE-031118-45	si:dkey-247k7.2 [Source:ZFIN;Acc:ZDB-GENE-031118-45]
4.00788e-23	0.490474	0.115	0.005	6.2054e-19	capn9	ENSDARG00000012341	capn9	https://zfin.org/ZDB-GENE-010724-2	calpain 9 [Source:ZFIN;Acc:ZDB-GENE-010724-2]
4.25342e-23	0.938077	0.418	0.148	6.58557e-19	spock2	ENSDARG00000075393	spock2	https://zfin.org/ZDB-GENE-090312-170	sparc/osteonectin, cwcv and kazal-like domains proteoglycan (testican) 2 [Source:ZFIN;Acc:ZDB-GENE-090312-170]
1.19516e-22	1.06897	0.533	0.254	1.85046e-18	s100a10b	ENSDARG00000025254	s100a10b	https://zfin.org/ZDB-GENE-040426-1937	S100 calcium binding protein A10b [Source:ZFIN;Acc:ZDB-GENE-040426-1937]
1.78884e-22	1.01005	0.445	0.173	2.76966e-18	epb41a	ENSDARG00000099283	epb41a	https://zfin.org/ZDB-GENE-070705-81	erythrocyte membrane protein band 4.1a [Source:ZFIN;Acc:ZDB-GENE-070705-81]
2.39774e-22	0.8101	0.742	0.531	3.71243e-18	copz2	ENSDARG00000006786	copz2	https://zfin.org/ZDB-GENE-000406-5	coatomer protein complex, subunit zeta 2 [Source:ZFIN;Acc:ZDB-GENE-000406-5]
2.90868e-22	0.716393	0.236	0.045	4.50351e-18	crb3b	ENSDARG00000068182	crb3b	https://zfin.org/ZDB-GENE-060610-3	crumbs homolog 3b [Source:ZFIN;Acc:ZDB-GENE-060610-3]
3.1887e-22	0.433639	0.121	0.007	4.93706e-18	gprc6a	ENSDARG00000005371	gprc6a	https://zfin.org/ZDB-GENE-041217-22	G protein-coupled receptor, class C, group 6, member A [Source:ZFIN;Acc:ZDB-GENE-041217-22]
4.87351e-22	1.2485	0.319	0.085	7.54566e-18	wnt11r	ENSDARG00000014796	wnt11r	https://zfin.org/ZDB-GENE-980526-249	wingless-type MMTV integration site family, member 11, related [Source:ZFIN;Acc:ZDB-GENE-980526-249]
4.11525e-21	0.907203	0.456	0.179	6.37165e-17	si:dkey-103g5.3	ENSDARG00000062319	si:dkey-103g5.3	https://zfin.org/ZDB-GENE-131127-337	si:dkey-103g5.3 [Source:ZFIN;Acc:ZDB-GENE-131127-337]
6.07669e-21	0.754616	0.857	0.721	9.40853e-17	si:dkey-152p16.6	ENSDARG00000104181	si:dkey-152p16.6	https://zfin.org/ZDB-GENE-030131-8575	si:dkey-152p16.6 [Source:ZFIN;Acc:ZDB-GENE-030131-8575]
1.29083e-20	0.807224	0.687	0.456	1.99859e-16	tagln2	ENSDARG00000033466	tagln2	https://zfin.org/ZDB-GENE-020802-2	transgelin 2 [Source:ZFIN;Acc:ZDB-GENE-020802-2]
1.92963e-20	0.463812	0.104	0.005	2.98765e-16	ovgp1	ENSDARG00000075745	ovgp1	https://zfin.org/ZDB-GENE-140106-118	oviductal glycoprotein 1 [Source:ZFIN;Acc:ZDB-GENE-140106-118]
2.84532e-20	0.919883	0.632	0.404	4.4054e-16	gstm.1	ENSDARG00000042533	gstm.1	https://zfin.org/ZDB-GENE-030911-2	glutathione S-transferase mu, tandem duplicate 1 [Source:ZFIN;Acc:ZDB-GENE-030911-2]
1.13436e-19	0.378528	0.121	0.009	1.75632e-15	pknox2	ENSDARG00000055349	pknox2	https://zfin.org/ZDB-GENE-031118-112	pbx/knotted 1 homeobox 2 [Source:ZFIN;Acc:ZDB-GENE-031118-112]
4.95443e-19	0.603338	0.852	0.755	7.67095e-15	si:ch211-39i22.1	ENSDARG00000087508	si:ch211-39i22.1	https://zfin.org/ZDB-GENE-120215-258	si:ch211-39i22.1 [Source:ZFIN;Acc:ZDB-GENE-120215-258]
2.31688e-18	0.845967	0.61	0.373	3.58723e-14	MGAT4D	ENSDARG00000099923	MGAT4D	https://zfin.org/ZDB-GENE-061103-283	zgc:154054 [Source:ZFIN;Acc:ZDB-GENE-061103-283]
2.56959e-18	0.611333	0.945	0.85	3.9785e-14	icn	ENSDARG00000009978	icn	https://zfin.org/ZDB-GENE-030131-8599	ictacalcin [Source:ZFIN;Acc:ZDB-GENE-030131-8599]
4.50932e-18	0.515506	0.126	0.013	6.98178e-14	fat2	ENSDARG00000018923	fat2	https://zfin.org/ZDB-GENE-111031-1	FAT atypical cadherin 2 [Source:ZFIN;Acc:ZDB-GENE-111031-1]
7.9648e-18	0.672748	0.302	0.091	1.23319e-13	stat3	ENSDARG00000022712	stat3	https://zfin.org/ZDB-GENE-980526-68	signal transducer and activator of transcription 3 (acute-phase response factor) [Source:ZFIN;Acc:ZDB-GENE-980526-68]
1.02559e-17	0.737607	0.901	0.858	1.58792e-13	id1.1	ENSDARG00000096939	id1	https://zfin.org/
2.56201e-17	0.588435	0.11	0.009	3.96676e-13	ponzr1	ENSDARG00000090444	ponzr1	https://zfin.org/ZDB-GENE-070727-1	plac8 onzin related protein 1 [Source:ZFIN;Acc:ZDB-GENE-070727-1]
3.28973e-17	0.461952	0.11	0.009	5.09349e-13	si:ch73-70c5.2	ENSDARG00000097123	si:ch73-70c5.2	https://zfin.org/ZDB-GENE-131121-313	si:ch73-70c5.2 [Source:ZFIN;Acc:ZDB-GENE-131121-313]
8.81219e-17	1.06364	0.192	0.039	1.36439e-12	id2b	ENSDARG00000029544	id2b	https://zfin.org/ZDB-GENE-030131-15	inhibitor of DNA binding 2, dominant negative helix-loop-helix protein, b [Source:ZFIN;Acc:ZDB-GENE-030131-15]
1.07207e-16	0.759396	0.626	0.39	1.65988e-12	tagapa	ENSDARG00000002353	tagapa	https://zfin.org/ZDB-GENE-040426-1877	T-cell activation RhoGTPase activating protein a [Source:ZFIN;Acc:ZDB-GENE-040426-1877]
4.85557e-16	0.929432	0.225	0.058	7.51788e-12	inhbaa	ENSDARG00000012671	inhbaa	https://zfin.org/ZDB-GENE-000210-21	inhibin, beta Aa [Source:ZFIN;Acc:ZDB-GENE-000210-21]
4.99866e-16	0.644816	0.962	0.942	7.73943e-12	marcksl1b	ENSDARG00000035715	marcksl1b	https://zfin.org/ZDB-GENE-040426-2315	MARCKS-like 1b [Source:ZFIN;Acc:ZDB-GENE-040426-2315]
9.51349e-16	1.05522	0.516	0.289	1.47297e-11	zgc:123068	ENSDARG00000017489	zgc:123068	https://zfin.org/ZDB-GENE-051030-98	zgc:123068 [Source:ZFIN;Acc:ZDB-GENE-051030-98]
2.71483e-15	0.742494	0.566	0.332	4.20337e-11	igsf9a	ENSDARG00000075864	igsf9a	https://zfin.org/ZDB-GENE-060503-288	immunoglobulin superfamily, member 9a [Source:ZFIN;Acc:ZDB-GENE-060503-288]
3.32173e-15	0.732438	0.802	0.658	5.14304e-11	CU019646.2	ENSDARG00000091234	CU019646.2	https://zfin.org/
8.23392e-15	0.850581	0.291	0.101	1.27486e-10	plk3	ENSDARG00000038754	plk3	https://zfin.org/ZDB-GENE-030131-6134	polo-like kinase 3 (Drosophila) [Source:ZFIN;Acc:ZDB-GENE-030131-6134]
8.73489e-15	0.579692	0.176	0.037	1.35242e-10	s100v1	ENSDARG00000070427	s100v1	https://zfin.org/ZDB-GENE-080407-1	S100 calcium binding protein V1 [Source:ZFIN;Acc:ZDB-GENE-080407-1]
9.13654e-15	0.80573	0.187	0.042	1.41461e-10	tnfb	ENSDARG00000013598	tnfb	https://zfin.org/ZDB-GENE-050601-2	tumor necrosis factor b (TNF superfamily, member 2) [Source:ZFIN;Acc:ZDB-GENE-050601-2]
2.01713e-14	0.833693	0.434	0.212	3.12313e-10	ppdpfa	ENSDARG00000007682	ppdpfa	https://zfin.org/ZDB-GENE-030219-204	pancreatic progenitor cell differentiation and proliferation factor a [Source:ZFIN;Acc:ZDB-GENE-030219-204]
3.08758e-14	0.754597	0.423	0.206	4.7805e-10	si:ch73-95l15.5	ENSDARG00000087596	si:ch73-95l15.5	https://zfin.org/ZDB-GENE-030131-3481	si:ch73-95l15.5 [Source:ZFIN;Acc:ZDB-GENE-030131-3481]
3.27655e-14	0.718119	0.544	0.307	5.07309e-10	fndc7rs4	ENSDARG00000092813	fndc7rs4	https://zfin.org/ZDB-GENE-070912-648	fibronectin type III domain containing 7, related sequence 4 [Source:ZFIN;Acc:ZDB-GENE-070912-648]
4.51493e-14	0.525275	0.929	0.917	6.99046e-10	si:ch211-103f14.3	ENSDARG00000088315	si:ch211-103f14.3	https://zfin.org/ZDB-GENE-110411-160	si:ch211-103f14.3 [Source:ZFIN;Acc:ZDB-GENE-110411-160]
5.73624e-14	0.618799	0.187	0.045	8.88141e-10	tnnt2b	ENSDARG00000100694	tnnt2b	https://zfin.org/ZDB-GENE-091106-2	troponin T type 2b (cardiac) [Source:ZFIN;Acc:ZDB-GENE-091106-2]
1.08676e-13	0.706199	0.588	0.398	1.68264e-09	pmp22a	ENSDARG00000105223	pmp22a	https://zfin.org/ZDB-GENE-030131-6757	peripheral myelin protein 22a [Source:ZFIN;Acc:ZDB-GENE-030131-6757]
1.40886e-13	0.562321	0.192	0.048	2.18134e-09	rgs12a	ENSDARG00000009610	rgs12a	https://zfin.org/ZDB-GENE-030131-2614	regulator of G-protein signaling 12a [Source:ZFIN;Acc:ZDB-GENE-030131-2614]
1.47992e-13	0.471676	0.159	0.033	2.29135e-09	ctss2.2	ENSDARG00000013771	ctss2.2	https://zfin.org/ZDB-GENE-050626-55	cathepsin S, ortholog 2, tandem duplicate 2 [Source:ZFIN;Acc:ZDB-GENE-050626-55]
1.63783e-13	0.767801	0.544	0.34	2.53585e-09	ccng2	ENSDARG00000017602	ccng2	https://zfin.org/ZDB-GENE-021016-1	cyclin G2 [Source:ZFIN;Acc:ZDB-GENE-021016-1]
2.47468e-13	0.547562	0.176	0.041	3.83155e-09	si:dkeyp-104f11.9	ENSDARG00000096715	si:dkeyp-104f11.9	https://zfin.org/ZDB-GENE-130603-41	si:dkeyp-104f11.9 [Source:ZFIN;Acc:ZDB-GENE-130603-41]
2.56524e-13	0.51835	0.791	0.675	3.97175e-09	fxyd6l	ENSDARG00000097057	fxyd6l	https://zfin.org/ZDB-GENE-071205-8	FXYD domain containing ion transport regulator 6 like [Source:ZFIN;Acc:ZDB-GENE-071205-8]
5.85054e-13	0.649567	0.198	0.053	9.05839e-09	ak1	ENSDARG00000001950	ak1	https://zfin.org/ZDB-GENE-040822-37	adenylate kinase 1 [Source:ZFIN;Acc:ZDB-GENE-040822-37]
1.46588e-12	0.40828	0.929	0.908	2.26962e-08	fam46bb	ENSDARG00000011797	fam46bb	https://zfin.org/ZDB-GENE-060503-431	family with sequence similarity 46, member Bb [Source:ZFIN;Acc:ZDB-GENE-060503-431]
1.60608e-12	0.694678	0.401	0.203	2.4867e-08	eif4ebp3	ENSDARG00000054916	eif4ebp3	https://zfin.org/ZDB-GENE-041114-44	eukaryotic translation initiation factor 4E binding protein 3 [Source:ZFIN;Acc:ZDB-GENE-041114-44]
2.77951e-12	0.562239	0.187	0.051	4.30351e-08	zgc:113162	ENSDARG00000052923	zgc:113162	https://zfin.org/ZDB-GENE-050522-530	zgc:113162 [Source:ZFIN;Acc:ZDB-GENE-050522-530]
4.09126e-12	0.608873	0.286	0.112	6.33449e-08	eno1b	ENSDARG00000013750	eno1b	https://zfin.org/ZDB-GENE-040426-1651	enolase 1b, (alpha) [Source:ZFIN;Acc:ZDB-GENE-040426-1651]
4.59253e-12	0.71676	0.533	0.368	7.11062e-08	prrg2	ENSDARG00000087193	prrg2	https://zfin.org/ZDB-GENE-130625-1	proline rich Gla (G-carboxyglutamic acid) 2 [Source:ZFIN;Acc:ZDB-GENE-130625-1]
4.78325e-12	0.470057	0.868	0.84	7.40591e-08	eef1da	ENSDARG00000102291	eef1da	https://zfin.org/ZDB-GENE-040426-2740	eukaryotic translation elongation factor 1 delta a (guanine nucleotide exchange protein) [Source:ZFIN;Acc:ZDB-GENE-040426-2740]
7.45704e-12	0.77895	0.544	0.385	1.15457e-07	ackr3b	ENSDARG00000058179	ackr3b	https://zfin.org/ZDB-GENE-031116-61	atypical chemokine receptor 3b [Source:ZFIN;Acc:ZDB-GENE-031116-61]
1.26639e-11	0.76616	0.429	0.233	1.96076e-07	her6	ENSDARG00000006514	her6	https://zfin.org/ZDB-GENE-980526-144	hairy-related 6 [Source:ZFIN;Acc:ZDB-GENE-980526-144]
1.82697e-11	0.647449	0.434	0.242	2.8287e-07	VPS37D	ENSDARG00000097055	VPS37D	https://zfin.org/ZDB-GENE-060526-166	si:ch211-284f22.3 [Source:ZFIN;Acc:ZDB-GENE-060526-166]
1.8308e-11	0.432038	0.115	0.021	2.83463e-07	arhgap6	ENSDARG00000059672	arhgap6	https://zfin.org/ZDB-GENE-060616-298	Rho GTPase activating protein 6 [Source:ZFIN;Acc:ZDB-GENE-060616-298]
1.93241e-11	0.68925	0.555	0.373	2.99196e-07	arg2	ENSDARG00000039269	arg2	https://zfin.org/ZDB-GENE-030131-1334	arginase 2 [Source:ZFIN;Acc:ZDB-GENE-030131-1334]
2.35674e-11	0.722481	0.264	0.103	3.64895e-07	plekha6	ENSDARG00000020328	plekha6	https://zfin.org/ZDB-GENE-140106-14	pleckstrin homology domain containing, family A member 6 [Source:ZFIN;Acc:ZDB-GENE-140106-14]
2.74968e-11	0.488471	0.11	0.019	4.25732e-07	nuak1b	ENSDARG00000028676	nuak1b	https://zfin.org/ZDB-GENE-131120-18	NUAK family, SNF1-like kinase, 1b [Source:ZFIN;Acc:ZDB-GENE-131120-18]
4.45416e-11	0.31076	1	0.994	6.89638e-07	cldnb	ENSDARG00000009544	cldnb	https://zfin.org/ZDB-GENE-010328-2	claudin b [Source:ZFIN;Acc:ZDB-GENE-010328-2]
8.69658e-11	0.683883	0.56	0.391	1.34649e-06	wu:fb18f06	ENSDARG00000097635	wu:fb18f06	https://zfin.org/ZDB-GENE-030131-261	wu:fb18f06 [Source:ZFIN;Acc:ZDB-GENE-030131-261]
2.19911e-10	0.621175	0.198	0.065	3.40489e-06	rnf183.1	ENSDARG00000068851	rnf183	https://zfin.org/ZDB-GENE-060929-1090	ring finger protein 183 [Source:ZFIN;Acc:ZDB-GENE-060929-1090]
2.25515e-10	0.405194	0.813	0.657	3.49164e-06	pabpc1b	ENSDARG00000021140	pabpc1b	https://zfin.org/ZDB-GENE-050308-1	poly A binding protein, cytoplasmic 1 b [Source:ZFIN;Acc:ZDB-GENE-050308-1]
3.80964e-10	0.677037	0.511	0.345	5.89846e-06	ahnak	ENSDARG00000061764	ahnak	https://zfin.org/ZDB-GENE-030131-8719	AHNAK nucleoprotein [Source:ZFIN;Acc:ZDB-GENE-030131-8719]
7.04244e-10	0.479652	0.132	0.032	1.09038e-05	myo18aa	ENSDARG00000075752	myo18aa	https://zfin.org/ZDB-GENE-080425-5	myosin XVIIIAa [Source:ZFIN;Acc:ZDB-GENE-080425-5]
8.3697e-10	0.553752	0.341	0.171	1.29588e-05	TSTA3.1	ENSDARG00000039669	TSTA3	https://zfin.org/ZDB-GENE-040801-35	zgc:100864 [Source:ZFIN;Acc:ZDB-GENE-040801-35]
2.11201e-09	0.64255	0.451	0.284	3.27003e-05	rsrp1	ENSDARG00000030440	rsrp1	https://zfin.org/ZDB-GENE-060616-210	arginine/serine-rich protein 1 [Source:ZFIN;Acc:ZDB-GENE-060616-210]
2.6731e-09	0.626445	0.39	0.227	4.13876e-05	tax1bp3	ENSDARG00000059177	tax1bp3	https://zfin.org/ZDB-GENE-040426-2830	Tax1 (human T-cell leukemia virus type I) binding protein 3 [Source:ZFIN;Acc:ZDB-GENE-040426-2830]
3.26923e-09	0.591839	0.324	0.173	5.06174e-05	lnx2b	ENSDARG00000071478	lnx2b	https://zfin.org/ZDB-GENE-040426-2500	ligand of numb-protein X 2b [Source:ZFIN;Acc:ZDB-GENE-040426-2500]
6.6189e-09	0.573074	0.247	0.107	0.00010248	ddah2	ENSDARG00000105009	ddah2	https://zfin.org/ZDB-GENE-030131-913	dimethylarginine dimethylaminohydrolase 2 [Source:ZFIN;Acc:ZDB-GENE-030131-913]
6.75166e-09	0.64987	0.368	0.212	0.000104536	ccl20b	ENSDARG00000094511	ccl20b	https://zfin.org/ZDB-GENE-091204-95	chemokine (C-C motif) ligand 20b [Source:ZFIN;Acc:ZDB-GENE-091204-95]
7.78619e-09	0.277358	1	0.996	0.000120554	zgc:158343	ENSDARG00000099411	zgc:158343	https://zfin.org/ZDB-GENE-061201-9	zgc:158343 [Source:ZFIN;Acc:ZDB-GENE-061201-9]

## Sheet: node19_vs_node18
p_val	avg_logFC	pct.1	pct.2	p_val_adj	Gene.name.uniq	Ensembl.Gene.ID	Associated.Gene.Name	ZFIN.ID	Description
4.60457e-62	-1.68783	0.747	0.971	7.12926e-58	zgc:77517	ENSDARG00000028618	zgc:77517	https://zfin.org/ZDB-GENE-040426-1508	zgc:77517 [Source:ZFIN;Acc:ZDB-GENE-040426-1508]
2.45962e-47	-2.29853	0.302	0.801	3.80823e-43	cbln20	ENSDARG00000087476	cbln20	https://zfin.org/ZDB-GENE-111109-2	cerebellin 20 [Source:ZFIN;Acc:ZDB-GENE-111109-2]
1.68483e-38	-1.93104	0.445	0.841	2.60863e-34	si:ch211-229d2.5	ENSDARG00000079119	si:ch211-229d2.5	https://zfin.org/ZDB-GENE-121214-200	si:ch211-229d2.5 [Source:ZFIN;Acc:ZDB-GENE-121214-200]
5.14985e-38	-1.75941	0.11	0.647	7.97351e-34	slc1a3a	ENSDARG00000104431	slc1a3a	https://zfin.org/ZDB-GENE-030131-2159	solute carrier family 1 (glial high affinity glutamate transporter), member 3a [Source:ZFIN;Acc:ZDB-GENE-030131-2159]
9.13568e-38	-1.3066	0.137	0.692	1.41448e-33	CR847847.1	ENSDARG00000087096	CR847847.1	https://zfin.org/
2.12439e-37	-0.734244	1	1	3.2892e-33	si:dkey-205h13.2	ENSDARG00000089429	si:dkey-205h13.2	https://zfin.org/ZDB-GENE-080225-18	si:dkey-205h13.2 [Source:ZFIN;Acc:ZDB-GENE-080225-18]
1.37555e-36	-1.35478	0.088	0.632	2.12976e-32	cadm4	ENSDARG00000040291	cadm4	https://zfin.org/ZDB-GENE-041114-138	cell adhesion molecule 4 [Source:ZFIN;Acc:ZDB-GENE-041114-138]
1.7256e-36	-1.04579	0.429	0.872	2.67175e-32	klf17	ENSDARG00000038792	klf17	https://zfin.org/ZDB-GENE-010129-1	Kruppel-like factor 17 [Source:ZFIN;Acc:ZDB-GENE-010129-1]
6.82284e-35	-2.59674	0.467	0.822	1.05638e-30	si:dkeyp-110c7.4	ENSDARG00000100476	si:dkeyp-110c7.4	https://zfin.org/ZDB-GENE-070705-532	si:dkeyp-110c7.4 [Source:ZFIN;Acc:ZDB-GENE-070705-532]
2.99445e-33	-1.61334	0.154	0.635	4.63631e-29	si:dkey-33m11.8	ENSDARG00000055014	si:dkey-33m11.8	https://zfin.org/ZDB-GENE-141215-49	si:dkey-33m11.8 [Source:ZFIN;Acc:ZDB-GENE-141215-49]
3.39577e-31	-1.38764	0.225	0.681	5.25768e-27	aqp3a	ENSDARG00000003808	aqp3a	https://zfin.org/ZDB-GENE-040426-2826	aquaporin 3a [Source:ZFIN;Acc:ZDB-GENE-040426-2826]
1.41751e-28	-2.31231	0.835	0.953	2.19474e-24	si:dkey-4p15.5	ENSDARG00000086272	si:dkey-4p15.5	https://zfin.org/ZDB-GENE-121214-193	si:dkey-4p15.5 [Source:ZFIN;Acc:ZDB-GENE-121214-193]
1.46623e-26	-0.727926	0.56	0.888	2.27016e-22	tmsb	ENSDARG00000054911	tmsb	https://zfin.org/ZDB-GENE-050307-5	thymosin, beta [Source:ZFIN;Acc:ZDB-GENE-050307-5]
1.7793e-26	-0.717655	0.764	0.93	2.75489e-22	pdia3	ENSDARG00000102640	pdia3	https://zfin.org/ZDB-GENE-031002-9	protein disulfide isomerase family A, member 3 [Source:ZFIN;Acc:ZDB-GENE-031002-9]
1.03729e-25	-1.22437	0.324	0.697	1.60603e-21	cxcl14	ENSDARG00000056627	cxcl14	https://zfin.org/ZDB-GENE-000619-1	chemokine (C-X-C motif) ligand 14 [Source:ZFIN;Acc:ZDB-GENE-000619-1]
2.74812e-25	-1.49441	0.132	0.561	4.25491e-21	si:ch211-152f23.5	ENSDARG00000019741	si:ch211-152f23.5	https://zfin.org/ZDB-GENE-080917-47	si:ch211-152f23.5 [Source:ZFIN;Acc:ZDB-GENE-080917-47]
2.87859e-25	-1.28311	0.148	0.579	4.45692e-21	stm	ENSDARG00000035694	stm	https://zfin.org/ZDB-GENE-031112-4	starmaker [Source:ZFIN;Acc:ZDB-GENE-031112-4]
5.62443e-23	-1.0881	0.06	0.463	8.7083e-19	vsig8a	ENSDARG00000054050	vsig8a	https://zfin.org/ZDB-GENE-050417-338	V-set and immunoglobulin domain containing 8a [Source:ZFIN;Acc:ZDB-GENE-050417-338]
1.29031e-21	-1.33243	0.154	0.534	1.99778e-17	tmem176l.2	ENSDARG00000089399	tmem176l.2	https://zfin.org/ZDB-GENE-080829-12	transmembrane protein 176l.2 [Source:ZFIN;Acc:ZDB-GENE-080829-12]
1.70621e-21	-1.29569	0.055	0.429	2.64172e-17	lfng	ENSDARG00000037879	lfng	https://zfin.org/ZDB-GENE-980605-16	LFNG O-fucosylpeptide 3-beta-N-acetylglucosaminyltransferase [Source:ZFIN;Acc:ZDB-GENE-980605-16]
5.34557e-21	-0.950806	0.236	0.617	8.27655e-17	sparc	ENSDARG00000019353	sparc	https://zfin.org/ZDB-GENE-030131-9	secreted protein, acidic, cysteine-rich (osteonectin) [Source:ZFIN;Acc:ZDB-GENE-030131-9]
1.90132e-20	-0.417124	0.978	0.992	2.94382e-16	rps20	ENSDARG00000036044	rps20	https://zfin.org/ZDB-GENE-040426-2284	ribosomal protein S20 [Source:ZFIN;Acc:ZDB-GENE-040426-2284]
6.83329e-20	-0.473779	0.929	0.977	1.058e-15	rplp2l	ENSDARG00000011201	rplp2l	https://zfin.org/ZDB-GENE-070327-2	ribosomal protein, large P2, like [Source:ZFIN;Acc:ZDB-GENE-070327-2]
2.83634e-19	-1.426	0.06	0.403	4.39151e-15	CABZ01067232.1	ENSDARG00000057408	CABZ01067232.1	https://zfin.org/
5.15029e-19	-1.18318	0.027	0.364	7.97419e-15	AL954146.1	ENSDARG00000038891	AL954146.1	https://zfin.org/
2.66986e-18	-0.853982	0.258	0.623	4.13374e-14	prss60.2	ENSDARG00000055644	prss60.2	https://zfin.org/ZDB-GENE-050320-109	protease, serine, 60.2 [Source:ZFIN;Acc:ZDB-GENE-050320-109]
4.54263e-18	-0.576218	0.665	0.873	7.03336e-14	gpx1a	ENSDARG00000018146	gpx1a	https://zfin.org/ZDB-GENE-030410-1	glutathione peroxidase 1a [Source:ZFIN;Acc:ZDB-GENE-030410-1]
7.74169e-18	-0.568238	0.659	0.87	1.19865e-13	ppib	ENSDARG00000092798	ppib	https://zfin.org/ZDB-GENE-040426-1955	peptidylprolyl isomerase B (cyclophilin B) [Source:ZFIN;Acc:ZDB-GENE-040426-1955]
3.60102e-17	-0.967827	0.033	0.343	5.57547e-13	atp1a1b	ENSDARG00000019856	atp1a1b	https://zfin.org/ZDB-GENE-001212-5	ATPase, Na+/K+ transporting, alpha 1b polypeptide [Source:ZFIN;Acc:ZDB-GENE-001212-5]
1.66166e-16	-0.771454	0.055	0.373	2.57275e-12	amer2	ENSDARG00000075222	amer2	https://zfin.org/ZDB-GENE-070719-5	APC membrane recruitment protein 2 [Source:ZFIN;Acc:ZDB-GENE-070719-5]
2.19939e-16	-0.582621	0.725	0.914	3.40532e-12	hspa5	ENSDARG00000103846	hspa5	https://zfin.org/ZDB-GENE-031001-11	heat shock protein 5 [Source:ZFIN;Acc:ZDB-GENE-031001-11]
5.32364e-16	-0.703454	0.17	0.512	8.2426e-12	cpm	ENSDARG00000011769	cpm	https://zfin.org/ZDB-GENE-041210-191	carboxypeptidase M [Source:ZFIN;Acc:ZDB-GENE-041210-191]
1.5878e-15	-0.803698	0.022	0.309	2.45839e-11	mfng	ENSDARG00000042925	mfng	https://zfin.org/ZDB-GENE-041130-1	MFNG O-fucosylpeptide 3-beta-N-acetylglucosaminyltransferase [Source:ZFIN;Acc:ZDB-GENE-041130-1]
1.82478e-15	-0.457896	0.89	0.979	2.82531e-11	si:ch211-153b23.5	ENSDARG00000058206	si:ch211-153b23.5	https://zfin.org/ZDB-GENE-030131-9744	si:ch211-153b23.5 [Source:ZFIN;Acc:ZDB-GENE-030131-9744]
3.20889e-15	-0.946123	0.06	0.36	4.96832e-11	ebf3a	ENSDARG00000100244	ebf3a	https://zfin.org/ZDB-GENE-070112-292	early B-cell factor 3a [Source:ZFIN;Acc:ZDB-GENE-070112-292]
3.40269e-15	-1.27349	0.071	0.363	5.26838e-11	zgc:165423	ENSDARG00000052905	zgc:165423	https://zfin.org/ZDB-GENE-070720-11	zgc:165423 [Source:ZFIN;Acc:ZDB-GENE-070720-11]
6.20607e-15	-0.76229	0.198	0.508	9.60885e-11	btbd6b	ENSDARG00000032369	btbd6b	https://zfin.org/ZDB-GENE-030829-65	BTB (POZ) domain containing 6b [Source:ZFIN;Acc:ZDB-GENE-030829-65]
6.24372e-15	-0.954512	0.06	0.352	9.66715e-11	znf185	ENSDARG00000103917	znf185	https://zfin.org/ZDB-GENE-061103-355	zinc finger protein 185 (LIM domain) [Source:ZFIN;Acc:ZDB-GENE-061103-355]
6.70201e-15	-0.686018	0.126	0.452	1.03767e-10	degs1	ENSDARG00000007347	degs1	https://zfin.org/ZDB-GENE-030131-5283	delta(4)-desaturase, sphingolipid 1 [Source:ZFIN;Acc:ZDB-GENE-030131-5283]
1.33081e-14	-0.889432	0.022	0.292	2.06049e-10	si:ch211-71m22.1	ENSDARG00000058638	si:ch211-71m22.1	https://zfin.org/ZDB-GENE-070705-193	si:ch211-71m22.1 [Source:ZFIN;Acc:ZDB-GENE-070705-193]
1.51551e-14	-0.598886	0.346	0.675	2.34647e-10	dnajb11	ENSDARG00000015088	dnajb11	https://zfin.org/ZDB-GENE-031113-9	DnaJ (Hsp40) homolog, subfamily B, member 11 [Source:ZFIN;Acc:ZDB-GENE-031113-9]
3.16898e-14	-0.469901	1	1	4.90653e-10	si:rp71-1c10.11	ENSDARG00000096721	si:rp71-1c10.11	https://zfin.org/ZDB-GENE-130603-61	si:rp71-1c10.11 [Source:ZFIN;Acc:ZDB-GENE-130603-61]
3.29713e-14	-1.33827	0.264	0.541	5.10494e-10	glula	ENSDARG00000099776	glula	https://zfin.org/ZDB-GENE-030131-688	glutamate-ammonia ligase (glutamine synthase) a [Source:ZFIN;Acc:ZDB-GENE-030131-688]
4.0402e-14	-0.642779	0.055	0.343	6.25545e-10	fut8a	ENSDARG00000015449	fut8a	https://zfin.org/ZDB-GENE-031118-20	fucosyltransferase 8a (alpha (1,6) fucosyltransferase) [Source:ZFIN;Acc:ZDB-GENE-031118-20]
5.17371e-14	-0.560115	0.352	0.694	8.01045e-10	rpz5	ENSDARG00000075718	rpz5	https://zfin.org/ZDB-GENE-030131-4678	rapunzel 5 [Source:ZFIN;Acc:ZDB-GENE-030131-4678]
8.37378e-14	-0.745646	0.28	0.573	1.29651e-09	sepw2b	ENSDARG00000089936	sepw2b	https://zfin.org/ZDB-GENE-030428-2	selenoprotein W, 2b [Source:ZFIN;Acc:ZDB-GENE-030428-2]
1.21456e-13	-1.25443	0.077	0.348	1.8805e-09	rgcc	ENSDARG00000035810	rgcc	https://zfin.org/ZDB-GENE-040704-31	regulator of cell cycle [Source:ZFIN;Acc:ZDB-GENE-040704-31]
1.68391e-13	-0.504242	0.659	0.852	2.6072e-09	ptmaa	ENSDARG00000021113	ptmaa	https://zfin.org/ZDB-GENE-030131-7647	prothymosin, alpha a [Source:ZFIN;Acc:ZDB-GENE-030131-7647]
1.90369e-13	-0.456745	0.747	0.93	2.94749e-09	actb1	ENSDARG00000037746	actb1	https://zfin.org/ZDB-GENE-000329-1	actin, beta 1 [Source:ZFIN;Acc:ZDB-GENE-000329-1]
8.82465e-13	-0.736777	0.044	0.302	1.36632e-08	prss23	ENSDARG00000055786	prss23	https://zfin.org/ZDB-GENE-030131-9149	protease, serine, 23 [Source:ZFIN;Acc:ZDB-GENE-030131-9149]
9.72774e-13	-1.26523	0.082	0.338	1.50615e-08	si:ch73-261i21.5	ENSDARG00000105061	si:ch73-261i21.5	https://zfin.org/ZDB-GENE-110411-258	si:ch73-261i21.5 [Source:ZFIN;Acc:ZDB-GENE-110411-258]
9.90479e-13	-0.596688	0.352	0.622	1.53356e-08	mibp2	ENSDARG00000101844	mibp2	https://zfin.org/ZDB-GENE-031113-14	muscle-specific beta 1 integrin binding protein 2 [Source:ZFIN;Acc:ZDB-GENE-031113-14]
1.34552e-12	-0.283856	0.951	0.985	2.08327e-08	rpl26	ENSDARG00000102317	rpl26	https://zfin.org/ZDB-GENE-040426-2117	ribosomal protein L26 [Source:ZFIN;Acc:ZDB-GENE-040426-2117]
1.67753e-12	-0.339337	0.846	0.943	2.59732e-08	rpl36a	ENSDARG00000058105	rpl36a	https://zfin.org/ZDB-GENE-020423-1	ribosomal protein L36A [Source:ZFIN;Acc:ZDB-GENE-020423-1]
1.7166e-12	-1.30148	0.049	0.294	2.65781e-08	mb	ENSDARG00000031952	mb	https://zfin.org/ZDB-GENE-040426-1430	myoglobin [Source:ZFIN;Acc:ZDB-GENE-040426-1430]
3.44924e-12	-0.535422	0.516	0.777	5.34046e-08	hsp90b1	ENSDARG00000003570	hsp90b1	https://zfin.org/ZDB-GENE-031002-1	heat shock protein 90, beta (grp94), member 1 [Source:ZFIN;Acc:ZDB-GENE-031002-1]
5.3696e-12	-0.694253	0.088	0.355	8.31375e-08	bik	ENSDARG00000045549	bik	https://zfin.org/ZDB-GENE-041210-181	BCL2-interacting killer (apoptosis-inducing) [Source:ZFIN;Acc:ZDB-GENE-041210-181]
6.72304e-12	-0.571086	0.038	0.284	1.04093e-07	zgc:64106	ENSDARG00000011371	zgc:64106	https://zfin.org/ZDB-GENE-040426-1370	zgc:64106 [Source:ZFIN;Acc:ZDB-GENE-040426-1370]
9.16637e-12	-0.671676	0.203	0.489	1.41923e-07	zgc:55461	ENSDARG00000041723	zgc:55461	https://zfin.org/ZDB-GENE-060929-568	zgc:55461 [Source:ZFIN;Acc:ZDB-GENE-040426-2879]
9.33761e-12	-0.540125	0.72	0.839	1.44574e-07	tubb4b	ENSDARG00000002344	tubb4b	https://zfin.org/ZDB-GENE-030131-8625	tubulin, beta 4B class IVb [Source:ZFIN;Acc:ZDB-GENE-030131-8625]
1.18166e-11	-0.734644	0.093	0.352	1.82956e-07	si:dkey-225d17.2	ENSDARG00000091889	si:dkey-225d17.2	https://zfin.org/ZDB-GENE-081105-74	si:dkey-225d17.2 [Source:ZFIN;Acc:ZDB-GENE-081105-74]
1.20502e-11	-0.380493	0.852	0.927	1.86574e-07	rplp0	ENSDARG00000051783	rplp0	https://zfin.org/ZDB-GENE-000629-1	ribosomal protein, large, P0 [Source:ZFIN;Acc:ZDB-GENE-000629-1]
[truncated: 38 more rows]

## Sheet: cluster5_vs_cluster6
p_val	avg_logFC	pct.1	pct.2	p_val_adj	Gene.name.uniq	Ensembl.Gene.ID	Associated.Gene.Name	ZFIN.ID	Description
[truncated: 100 more rows]

## Sheet: cluster6_vs_cluster5
p_val	avg_logFC	pct.1	pct.2	p_val_adj	Gene.name.uniq	Ensembl.Gene.ID	Associated.Gene.Name	ZFIN.ID	Description
[truncated: 100 more rows]

[truncated: 18 more sheets: node20_vs_node21, node21_vs_node20, node22_vs_node23, node23_vs_node22, cluster3_vs_cluster4, cluster4_vs_cluster3, cluster7_vs_node25, node25_vs_cluster7, cluster13_vs_node24, node24_vs_cluster13, cluster12_vs_node27, node27_vs_cluster12, cluster14_vs_node26, node26_vs_cluster14, cluster8_vs_cluster9, cluster9_vs_cluster8, cluster10_vs_cluster11, cluster11_vs_cluster10]
