# Supplementary material for: scRNA-Seq reveals distinct stem cell populations that drive hair cell regeneration after loss of Fgf and Notch signaling
Source: eLife journal article supplement (doi:10.7554/elife.44431), 2019-01-25
Supplement: supp [file elife-44431-supp-v1.zip › elife_poa_e44431_Supplementary_File_13.xlsx]

## Sheet: README
To perform differential expression between each cluster, we used the Seurat function FindAllMarkers() and retained all genes with an adjusted p-value less than 0.001

## Sheet: markerTable
p_val	avg_logFC	pct.1	pct.2	p_val_adj	cluster	Gene.name.uniq	Gene.ID	ZFIN.ID	Description
0	2.12451	0.986	0.041	0	1	otofb	ENSDARG00000020581	https://zfin.org/ZDB-GENE-110406-5	otoferlin b [Source:ZFIN;Acc:ZDB-GENE-110406-5]
0	1.97627	0.964	0.04	0	1	enkur	ENSDARG00000031248	https://zfin.org/ZDB-GENE-070718-1	enkurin, TRPC channel interacting protein [Source:ZFIN;Acc:ZDB-GENE-070718-1]
0	1.81983	0.893	0.034	0	1	si:ch211-284k5.2	ENSDARG00000101455	https://zfin.org/ZDB-GENE-131127-514	si:ch211-284k5.2 [Source:ZFIN;Acc:ZDB-GENE-131127-514]
0	1.81394	0.95	0.029	0	1	dnajc5b	ENSDARG00000058147	https://zfin.org/ZDB-GENE-050413-1	DnaJ (Hsp40) homolog, subfamily C, member 5 beta [Source:ZFIN;Acc:ZDB-GENE-050413-1]
0	1.58356	0.743	0.017	0	1	cpn1.2	ENSDARG00000005185	https://zfin.org/ZDB-GENE-030131-9116	carboxypeptidase N, polypeptide 1 [Source:ZFIN;Acc:ZDB-GENE-030131-9116]
0	1.51335	0.821	0.025	0	1	si:dkey-16m19.1	ENSDARG00000097176	https://zfin.org/
0	1.43004	0.829	0.014	0	1	fam228a	ENSDARG00000042936	https://zfin.org/ZDB-GENE-041014-83	family with sequence similarity 228, member A [Source:ZFIN;Acc:ZDB-GENE-041014-83]
0	1.41758	0.8	0.013	0	1	daw1	ENSDARG00000021462	https://zfin.org/ZDB-GENE-050419-255	dynein assembly factor with WDR repeat domains 1 [Source:ZFIN;Acc:ZDB-GENE-050419-255]
0	1.35191	0.85	0.024	0	1	nme5	ENSDARG00000041617	https://zfin.org/ZDB-GENE-040718-221	NME/NM23 family member 5 [Source:ZFIN;Acc:ZDB-GENE-040718-221]
0	1.31553	0.75	0.018	0	1	scg5	ENSDARG00000032126	https://zfin.org/ZDB-GENE-040426-1687	secretogranin V [Source:ZFIN;Acc:ZDB-GENE-040426-1687]
0	1.30789	0.714	0.005	0	1	tmc2b	ENSDARG00000030311	https://zfin.org/ZDB-GENE-060526-262	transmembrane channel-like 2b [Source:ZFIN;Acc:ZDB-GENE-060526-262]
0	1.20079	0.707	0.014	0	1	si:dkey-27p23.3	ENSDARG00000075714	https://zfin.org/ZDB-GENE-070705-453	si:dkey-27p23.3 [Source:ZFIN;Acc:ZDB-GENE-070705-453]
0	1.16871	0.657	0.01	0	1	nrgnb	ENSDARG00000069361	https://zfin.org/ZDB-GENE-061027-337	neurogranin (protein kinase C substrate, RC3) b [Source:ZFIN;Acc:ZDB-GENE-070112-1912]
0	1.14578	0.714	0.013	0	1	tekt1	ENSDARG00000101331	https://zfin.org/ZDB-GENE-041114-99	tektin 1 [Source:ZFIN;Acc:ZDB-GENE-041114-99]
0	1.10404	0.671	0.011	0	1	gfi1aa	ENSDARG00000020746	https://zfin.org/ZDB-GENE-050522-534	growth factor independent 1A transcription repressor a [Source:ZFIN;Acc:ZDB-GENE-050522-534]
0	1.07153	0.707	0.012	0	1	pacrg	ENSDARG00000087556	https://zfin.org/ZDB-GENE-041114-100	PARK2 co-regulated [Source:ZFIN;Acc:ZDB-GENE-041114-100]
0	1.06462	0.679	0.013	0	1	ankrd45	ENSDARG00000011326	https://zfin.org/ZDB-GENE-050522-311	ankyrin repeat domain 45 [Source:ZFIN;Acc:ZDB-GENE-050522-311]
0	1.05368	0.657	0.007	0	1	zgc:171927	ENSDARG00000033056	https://zfin.org/ZDB-GENE-070822-21	zgc:171927 [Source:ZFIN;Acc:ZDB-GENE-070822-21]
0	1.05179	0.65	0.007	0	1	smpx	ENSDARG00000045302	https://zfin.org/ZDB-GENE-040704-24	small muscle protein, X-linked [Source:ZFIN;Acc:ZDB-GENE-040704-24]
0	0.924588	0.593	0.002	0	1	tmprss3a	ENSDARG00000053315	https://zfin.org/ZDB-GENE-070912-70	transmembrane protease, serine 3a [Source:ZFIN;Acc:ZDB-GENE-070912-70]
1.21006e-306	0.954296	0.636	0.01	1.68174e-302	1	cfap77	ENSDARG00000068122	https://zfin.org/ZDB-GENE-060526-106	cilia and flagella associated protein 77 [Source:ZFIN;Acc:ZDB-GENE-060526-106]
8.66302e-305	1.64124	0.836	0.031	1.20399e-300	1	camk2n1a	ENSDARG00000025855	https://zfin.org/ZDB-GENE-050522-319	calcium/calmodulin-dependent protein kinase II inhibitor 1a [Source:ZFIN;Acc:ZDB-GENE-050522-319]
3.33467e-302	1.18883	0.75	0.021	4.63452e-298	1	si:ch211-147d7.5	ENSDARG00000095457	https://zfin.org/ZDB-GENE-041014-353	si:ch211-147d7.5 [Source:ZFIN;Acc:ZDB-GENE-041014-353]
9.1675e-302	1.07447	0.7	0.016	1.2741e-297	1	si:ch211-57i17.5	ENSDARG00000041375	https://zfin.org/ZDB-GENE-041014-39	si:ch211-57i17.5 [Source:ZFIN;Acc:ZDB-GENE-041014-39]
1.74407e-299	1.16108	0.736	0.02	2.4239e-295	1	lhfpl5b	ENSDARG00000056458	https://zfin.org/ZDB-GENE-080220-51	lipoma HMGIC fusion partner-like 5b [Source:ZFIN;Acc:ZDB-GENE-080220-51]
3.15468e-299	0.752451	0.529	0.004	4.38438e-295	1	theg	ENSDARG00000078644	https://zfin.org/ZDB-GENE-070912-59	theg spermatid protein [Source:ZFIN;Acc:ZDB-GENE-070912-59]
8.54618e-299	1.75891	0.8	0.028	1.18775e-294	1	si:ch211-270n8.3	ENSDARG00000093646	https://zfin.org/ZDB-GENE-081028-50	si:ch211-270n8.3 [Source:ZFIN;Acc:ZDB-GENE-081028-50]
1.22902e-297	0.893911	0.614	0.01	1.70809e-293	1	si:ch211-57h10.1	ENSDARG00000088753	https://zfin.org/ZDB-GENE-060526-173	si:ch211-57h10.1 [Source:ZFIN;Acc:ZDB-GENE-060526-173]
4.98172e-294	1.18748	0.679	0.016	6.92359e-290	1	nptna	ENSDARG00000103002	https://zfin.org/ZDB-GENE-030804-7	neuroplastin a [Source:ZFIN;Acc:ZDB-GENE-030804-7]
3.69912e-291	0.851462	0.55	0.006	5.14104e-287	1	eef1a1b	ENSDARG00000069951	https://zfin.org/ZDB-GENE-050417-327	eukaryotic translation elongation factor 1 alpha 1b [Source:ZFIN;Acc:ZDB-GENE-050417-327]
2.98202e-288	1.67449	0.793	0.03	4.14442e-284	1	hsd17b7	ENSDARG00000088140	https://zfin.org/ZDB-GENE-061013-378	hydroxysteroid (17-beta) dehydrogenase 7 [Source:ZFIN;Acc:ZDB-GENE-061013-378]
1.96558e-287	1.25778	0.679	0.017	2.73177e-283	1	c5h11orf1	ENSDARG00000101743	https://zfin.org/	chromosome 5 open reading frame, human C11orf1 [Source:EntrezGene;Acc:797203]
9.16122e-287	1.2396	0.786	0.028	1.27323e-282	1	RSPH1	ENSDARG00000102261	https://zfin.org/	radial spoke head 1 homolog [Source:HGNC Symbol;Acc:HGNC:12371]
3.63115e-285	1.0486	0.55	0.006	5.04658e-281	1	si:ch211-193l2.10	ENSDARG00000099903	https://zfin.org/ZDB-GENE-160114-52	si:ch211-193l2.10 [Source:ZFIN;Acc:ZDB-GENE-160114-52]
9.07982e-284	1.9323	0.986	0.063	1.26191e-279	1	meig1	ENSDARG00000045705	https://zfin.org/ZDB-GENE-050320-33	meiosis/spermiogenesis associated 1 [Source:ZFIN;Acc:ZDB-GENE-050320-33]
1.2926e-280	0.864834	0.543	0.006	1.79646e-276	1	si:dkey-71b5.6.1	ENSDARG00000098861	https://zfin.org/	si:dkey-71b5.6 [Source:EntrezGene;Acc:100294632]
1.58334e-277	1.55217	0.9	0.047	2.20052e-273	1	tspan13b	ENSDARG00000070479	https://zfin.org/ZDB-GENE-041010-45	tetraspanin 13b [Source:ZFIN;Acc:ZDB-GENE-041010-45]
8.64118e-277	1.29688	0.664	0.017	1.20095e-272	1	sst6	ENSDARG00000093804	https://zfin.org/ZDB-GENE-081022-199	somatostatin 6 [Source:ZFIN;Acc:ZDB-GENE-081022-199]
1.23898e-274	0.879684	0.514	0.005	1.72194e-270	1	si:dkeyp-46h3.1	ENSDARG00000094407	https://zfin.org/
1.41456e-272	1.39454	0.864	0.041	1.96596e-268	1	EMB	ENSDARG00000059485	https://zfin.org/ZDB-GENE-070705-158	si:ch211-261c8.5 [Source:ZFIN;Acc:ZDB-GENE-070705-158]
5.38458e-271	0.866189	0.6	0.012	7.48349e-267	1	evlb	ENSDARG00000099720	https://zfin.org/ZDB-GENE-040426-1804	Enah/Vasp-like b [Source:ZFIN;Acc:ZDB-GENE-040426-1804]
5.70179e-267	0.840817	0.529	0.007	7.92434e-263	1	CU856539.4	ENSDARG00000090886	https://zfin.org/
1.10162e-266	1.03743	0.657	0.018	1.53103e-262	1	spata4	ENSDARG00000036189	https://zfin.org/ZDB-GENE-050417-153	spermatogenesis associated 4 [Source:ZFIN;Acc:ZDB-GENE-050417-153]
2.62786e-263	1.30713	0.743	0.028	3.65219e-259	1	tescb	ENSDARG00000030839	https://zfin.org/ZDB-GENE-040426-1903	tescalcin b [Source:ZFIN;Acc:ZDB-GENE-040426-1903]
2.15628e-262	0.887026	0.571	0.011	2.9968e-258	1	rsph9	ENSDARG00000017355	https://zfin.org/ZDB-GENE-051120-129	radial spoke head 9 homolog [Source:ZFIN;Acc:ZDB-GENE-051120-129]
4.5849e-258	0.776554	0.529	0.008	6.37209e-254	1	ccdc151	ENSDARG00000062978	https://zfin.org/ZDB-GENE-061013-787	coiled-coil domain containing 151 [Source:ZFIN;Acc:ZDB-GENE-061013-787]
6.90801e-257	1.74486	0.943	0.064	9.60075e-253	1	twf2b	ENSDARG00000009727	https://zfin.org/ZDB-GENE-050522-238	twinfilin actin-binding protein 2b [Source:ZFIN;Acc:ZDB-GENE-050522-238]
1.88478e-256	1.05478	0.593	0.013	2.61946e-252	1	tmem240b	ENSDARG00000090145	https://zfin.org/ZDB-GENE-131127-474	transmembrane protein 240b [Source:ZFIN;Acc:ZDB-GENE-131127-474]
1.90827e-254	1.91604	0.829	0.043	2.65211e-250	1	si:ch211-270n8.4	ENSDARG00000094423	https://zfin.org/ZDB-GENE-081028-70	si:ch211-270n8.4 [Source:ZFIN;Acc:ZDB-GENE-081028-70]
4.64642e-254	2.00981	0.75	0.032	6.45759e-250	1	zgc:198419	ENSDARG00000076221	https://zfin.org/ZDB-GENE-030131-7540	zgc:198419 [Source:ZFIN;Acc:ZDB-GENE-030131-7540]
6.11244e-251	2.51541	0.979	0.083	8.49506e-247	1	si:ch73-199k24.2	ENSDARG00000089149	https://zfin.org/ZDB-GENE-131121-321	si:ch73-199k24.2 [Source:ZFIN;Acc:ZDB-GENE-131121-321]
1.25151e-249	0.854669	0.529	0.009	1.73935e-245	1	kif1aa	ENSDARG00000061817	https://zfin.org/ZDB-GENE-100913-3	kinesin family member 1Aa [Source:ZFIN;Acc:ZDB-GENE-100913-3]
1.83234e-249	0.725007	0.486	0.006	2.54659e-245	1	tekt4	ENSDARG00000028899	https://zfin.org/ZDB-GENE-070410-98	tektin 4 [Source:ZFIN;Acc:ZDB-GENE-070410-98]
7.04929e-249	1.23956	0.814	0.04	9.79711e-245	1	atp1b2b	ENSDARG00000034424	https://zfin.org/ZDB-GENE-010718-1	ATPase, Na+/K+ transporting, beta 2b polypeptide [Source:ZFIN;Acc:ZDB-GENE-010718-1]
1.14156e-247	0.964134	0.514	0.008	1.58655e-243	1	sh2d4bb	ENSDARG00000015144	https://zfin.org/ZDB-GENE-130531-42	SH2 domain containing 4Bb [Source:ZFIN;Acc:ZDB-GENE-130531-42]
5.09552e-247	0.966356	0.5	0.007	7.08175e-243	1	si:ch211-163l21.7	ENSDARG00000034457	https://zfin.org/ZDB-GENE-081105-176	si:ch211-163l21.7 [Source:ZFIN;Acc:ZDB-GENE-081105-176]
2.2246e-246	3.5617	0.993	0.093	3.09175e-242	1	BX511021.2	ENSDARG00000073936	https://zfin.org/
3.60733e-246	0.683056	0.443	0.003	5.01347e-242	1	rsph14	ENSDARG00000017983	https://zfin.org/ZDB-GENE-081104-375	radial spoke head 14 homolog (Chlamydomonas) [Source:ZFIN;Acc:ZDB-GENE-081104-375]
7.84223e-246	1.35661	0.629	0.019	1.08991e-241	1	si:dkey-229d2.7	ENSDARG00000092460	https://zfin.org/ZDB-GENE-060526-265	si:dkey-229d2.7 [Source:ZFIN;Acc:ZDB-GENE-060526-265]
4.13282e-245	0.80761	0.607	0.016	5.74379e-241	1	EFCAB10	ENSDARG00000092825	https://zfin.org/ZDB-GENE-041111-13	si:dkey-42p14.3 [Source:ZFIN;Acc:ZDB-GENE-041111-13]
3.6108e-243	1.25589	0.607	0.017	5.01829e-239	1	otofa	ENSDARG00000030832	https://zfin.org/ZDB-GENE-030131-7778	otoferlin a [Source:ZFIN;Acc:ZDB-GENE-030131-7778]
1.35605e-242	0.961129	0.529	0.01	1.88464e-238	1	arpp21	ENSDARG00000061081	https://zfin.org/ZDB-GENE-081104-296	cAMP-regulated phosphoprotein, 21 [Source:ZFIN;Acc:ZDB-GENE-081104-296]
7.76559e-240	2.24568	1	0.095	1.07926e-235	1	calml4a	ENSDARG00000075800	https://zfin.org/ZDB-GENE-081022-9	calmodulin-like 4a [Source:ZFIN;Acc:ZDB-GENE-081022-9]
1.31079e-238	0.667414	0.479	0.006	1.82174e-234	1	ppp1r42	ENSDARG00000057632	https://zfin.org/ZDB-GENE-040704-43	protein phosphatase 1, regulatory subunit 42 [Source:ZFIN;Acc:ZDB-GENE-040704-43]
1.89171e-237	0.776731	0.571	0.014	2.6291e-233	1	cfap126	ENSDARG00000070868	https://zfin.org/ZDB-GENE-060825-357	cilia and flagella associated protein 126 [Source:ZFIN;Acc:ZDB-GENE-060825-357]
3.58063e-237	1.10482	0.636	0.021	4.97636e-233	1	capsla	ENSDARG00000103521	https://zfin.org/ZDB-GENE-030131-7291	calcyphosine-like a [Source:ZFIN;Acc:ZDB-GENE-030131-7291]
2.23946e-232	0.826261	0.521	0.011	3.1124e-228	1	tpd52l1	ENSDARG00000042548	https://zfin.org/ZDB-GENE-050522-121	tumor protein D52-like 1 [Source:ZFIN;Acc:ZDB-GENE-050522-121]
2.36659e-232	0.642491	0.421	0.003	3.28909e-228	1	BX510946.1	ENSDARG00000100901	https://zfin.org/
4.33153e-230	0.716263	0.45	0.005	6.01996e-226	1	ccdc114	ENSDARG00000015010	https://zfin.org/ZDB-GENE-041114-110	coiled-coil domain containing 114 [Source:ZFIN;Acc:ZDB-GENE-041114-110]
5.85211e-230	0.732297	0.464	0.006	8.13326e-226	1	iqcg	ENSDARG00000068678	https://zfin.org/ZDB-GENE-050419-109	IQ motif containing G [Source:ZFIN;Acc:ZDB-GENE-050419-109]
4.25902e-229	0.82047	0.486	0.008	5.91919e-225	1	osbpl1a	ENSDARG00000105147	https://zfin.org/ZDB-GENE-050208-657	oxysterol binding protein-like 1A [Source:ZFIN;Acc:ZDB-GENE-050208-657]
5.64933e-228	0.855941	0.55	0.014	7.85144e-224	1	dnali1	ENSDARG00000069815	https://zfin.org/ZDB-GENE-080204-7	dynein, axonemal, light intermediate chain 1 [Source:ZFIN;Acc:ZDB-GENE-080204-7]
1.06616e-227	0.842037	0.557	0.014	1.48175e-223	1	ribc1	ENSDARG00000055739	https://zfin.org/ZDB-GENE-081031-7	RIB43A domain with coiled-coils 1 [Source:ZFIN;Acc:ZDB-GENE-081031-7]
5.26956e-227	1.75148	0.971	0.081	7.32363e-223	1	atp2b1a	ENSDARG00000012684	https://zfin.org/ZDB-GENE-030925-29	ATPase, Ca++ transporting, plasma membrane 1a [Source:ZFIN;Acc:ZDB-GENE-030925-29]
4.28994e-222	0.909969	0.614	0.021	5.96215e-218	1	ropn1l	ENSDARG00000058370	https://zfin.org/ZDB-GENE-040724-235	rhophilin associated tail protein 1-like [Source:ZFIN;Acc:ZDB-GENE-040724-235]
8.76705e-222	0.786636	0.543	0.014	1.21845e-217	1	PIFO	ENSDARG00000097071	https://zfin.org/ZDB-GENE-090313-121	si:ch211-66i15.4 [Source:ZFIN;Acc:ZDB-GENE-090313-121]
5.30137e-221	1.24857	0.407	0.004	7.36784e-217	1	CABZ01067746.1	ENSDARG00000086059	https://zfin.org/
1.28924e-220	0.627841	0.429	0.005	1.79178e-216	1	zgc:171775	ENSDARG00000058381	https://zfin.org/ZDB-GENE-030131-4309	zgc:171775 [Source:ZFIN;Acc:ZDB-GENE-030131-4309]
3.25613e-217	0.898456	0.621	0.023	4.52538e-213	1	ccdc173	ENSDARG00000077928	https://zfin.org/ZDB-GENE-081104-457	coiled-coil domain containing 173 [Source:ZFIN;Acc:ZDB-GENE-081104-457]
1.14479e-214	0.552549	0.4	0.004	1.59103e-210	1	cfap45	ENSDARG00000068103	https://zfin.org/ZDB-GENE-070209-143	cilia and flagella associated protein 45 [Source:ZFIN;Acc:ZDB-GENE-070209-143]
6.22517e-214	0.910611	0.464	0.009	8.65175e-210	1	rtn4rl2b	ENSDARG00000037495	https://zfin.org/ZDB-GENE-040310-2	reticulon 4 receptor-like 2b [Source:ZFIN;Acc:ZDB-GENE-040310-2]
2.13707e-213	0.704524	0.479	0.01	2.9701e-209	1	zgc:171713	ENSDARG00000075515	https://zfin.org/ZDB-GENE-070820-17	zgc:171713 [Source:ZFIN;Acc:ZDB-GENE-070820-17]
3.2376e-213	1.05144	0.643	0.026	4.49961e-209	1	DYNLRB2	ENSDARG00000089952	https://zfin.org/ZDB-GENE-120709-101	si:ch211-147k9.8 [Source:ZFIN;Acc:ZDB-GENE-120709-101]
1.07286e-212	0.775952	0.45	0.007	1.49106e-208	1	si:dkey-43k4.3	ENSDARG00000052428	https://zfin.org/ZDB-GENE-120215-146	si:dkey-43k4.3 [Source:ZFIN;Acc:ZDB-GENE-120215-146]
1.19208e-212	1.41929	0.871	0.065	1.65675e-208	1	eno1a	ENSDARG00000022456	https://zfin.org/ZDB-GENE-030131-6048	enolase 1a, (alpha) [Source:ZFIN;Acc:ZDB-GENE-030131-6048]
2.87891e-211	0.564208	0.4	0.004	4.00111e-207	1	efhc1	ENSDARG00000009743	https://zfin.org/ZDB-GENE-040426-1300	EF-hand domain (C-terminal) containing 1 [Source:ZFIN;Acc:ZDB-GENE-040426-1300]
1.62742e-207	1.04026	0.486	0.011	2.26178e-203	1	scg5.1	ENSDARG00000077045	https://zfin.org/ZDB-GENE-040426-1687	secretogranin V [Source:ZFIN;Acc:ZDB-GENE-040426-1687]
2.43409e-207	2.34223	0.957	0.106	3.3829e-203	1	si:ch211-172l8.4	ENSDARG00000101577	https://zfin.org/ZDB-GENE-131127-224	si:ch211-172l8.4 [Source:ZFIN;Acc:ZDB-GENE-131127-224]
1.44545e-206	1.72469	0.914	0.081	2.00888e-202	1	gipc3	ENSDARG00000053074	https://zfin.org/ZDB-GENE-060616-326	GIPC PDZ domain containing family, member 3 [Source:ZFIN;Acc:ZDB-GENE-060616-326]
3.99982e-206	1.1278	0.679	0.033	5.55895e-202	1	lrrc73	ENSDARG00000063411	https://zfin.org/ZDB-GENE-111118-2	leucine rich repeat containing 73 [Source:ZFIN;Acc:ZDB-GENE-111118-2]
6.28768e-206	0.619734	0.421	0.006	8.73862e-202	1	IQCA1L	ENSDARG00000069230	https://zfin.org/ZDB-GENE-061013-622	zgc:153738 [Source:ZFIN;Acc:ZDB-GENE-061013-622]
2.83886e-204	0.913638	0.407	0.005	3.94544e-200	1	si:ch211-255p10.3	ENSDARG00000096616	https://zfin.org/ZDB-GENE-121214-339	si:ch211-255p10.3 [Source:ZFIN;Acc:ZDB-GENE-121214-339]
6.31889e-204	0.884765	0.536	0.017	8.78199e-200	1	RASSF5	ENSDARG00000070601	https://zfin.org/ZDB-GENE-141219-8	si:dkey-85p17.3 [Source:ZFIN;Acc:ZDB-GENE-141219-8]
9.43997e-204	0.868446	0.521	0.015	1.31197e-199	1	aldocb	ENSDARG00000019702	https://zfin.org/ZDB-GENE-030821-1	aldolase C, fructose-bisphosphate, b [Source:ZFIN;Acc:ZDB-GENE-030821-1]
2.0117e-202	1.00691	0.671	0.033	2.79586e-198	1	galnt11	ENSDARG00000063636	https://zfin.org/ZDB-GENE-060929-998	UDP-N-acetyl-alpha-D-galactosamine:polypeptide N-acetylgalactosaminyltransferase 11 (GalNAc-T11) [Source:ZFIN;Acc:ZDB-GENE-060929-998]
4.76834e-202	1.61942	0.893	0.077	6.62704e-198	1	sncb	ENSDARG00000104945	https://zfin.org/ZDB-GENE-040426-1615	synuclein, beta [Source:ZFIN;Acc:ZDB-GENE-040426-1615]
3.05828e-201	0.752681	0.507	0.014	4.2504e-197	1	catip	ENSDARG00000063009	https://zfin.org/ZDB-GENE-060929-1170	ciliogenesis associated TTC17 interacting protein [Source:ZFIN;Acc:ZDB-GENE-060929-1170]
1.33559e-199	1.1047	0.736	0.044	1.8562e-195	1	sh3glb2b	ENSDARG00000035470	https://zfin.org/ZDB-GENE-040426-833	SH3-domain GRB2-like endophilin B2b [Source:ZFIN;Acc:ZDB-GENE-040426-833]
1.36418e-198	0.604271	0.414	0.006	1.89594e-194	1	armc3	ENSDARG00000074708	https://zfin.org/ZDB-GENE-110614-1	armadillo repeat containing 3 [Source:ZFIN;Acc:ZDB-GENE-110614-1]
1.44584e-197	0.675486	0.421	0.007	2.00943e-193	1	MPV17L	ENSDARG00000104457	https://zfin.org/ZDB-GENE-120215-229	si:dkeyp-72e1.7 [Source:ZFIN;Acc:ZDB-GENE-120215-229]
1.57297e-197	0.560727	0.343	0.002	2.18611e-193	1	si:dkeyp-50b9.1	ENSDARG00000097421	https://zfin.org/ZDB-GENE-131127-254	si:dkeyp-50b9.1 [Source:ZFIN;Acc:ZDB-GENE-131127-254]
3.07719e-196	1.01645	0.707	0.04	4.27668e-192	1	asap1b	ENSDARG00000039729	https://zfin.org/ZDB-GENE-091112-16	ArfGAP with SH3 domain, ankyrin repeat and PH domain 1b [Source:ZFIN;Acc:ZDB-GENE-091112-16]
8.01613e-192	0.858846	0.557	0.021	1.11408e-187	1	ribc2	ENSDARG00000075177	https://zfin.org/ZDB-GENE-050411-27	RIB43A domain with coiled-coils 2 [Source:ZFIN;Acc:ZDB-GENE-050411-27]
1.20348e-191	0.650608	0.357	0.003	1.6726e-187	1	sh2d4ba	ENSDARG00000069374	https://zfin.org/ZDB-GENE-090313-53	SH2 domain containing 4Ba [Source:ZFIN;Acc:ZDB-GENE-090313-53]
7.33643e-189	0.832154	0.493	0.015	1.01962e-184	1	mkrn2os.2	ENSDARG00000100728	https://zfin.org/ZDB-GENE-160114-87	MKRN2 opposite strand, tandem duplicate 2 [Source:ZFIN;Acc:ZDB-GENE-160114-87]
1.84921e-183	1.3857	0.864	0.077	2.57003e-179	1	ift27	ENSDARG00000099279	https://zfin.org/ZDB-GENE-041212-9	intraflagellar transport 27 homolog (Chlamydomonas) [Source:ZFIN;Acc:ZDB-GENE-041212-9]
4.30408e-182	2.22864	0.986	0.143	5.98181e-178	1	gpx1b	ENSDARG00000006207	https://zfin.org/ZDB-GENE-040912-60	glutathione peroxidase 1b [Source:ZFIN;Acc:ZDB-GENE-040912-60]
4.35161e-182	0.907349	0.507	0.018	6.04787e-178	1	DCDC2C	ENSDARG00000103264	https://zfin.org/ZDB-GENE-160113-73	si:dkey-25g12.4 [Source:ZFIN;Acc:ZDB-GENE-160113-73]
2.48885e-181	0.66044	0.407	0.008	3.45901e-177	1	si:dkey-19b23.13	ENSDARG00000061850	https://zfin.org/ZDB-GENE-140106-78	si:dkey-19b23.13 [Source:ZFIN;Acc:ZDB-GENE-140106-78]
5.78572e-181	0.579765	0.371	0.005	8.04099e-177	1	foxj1a	ENSDARG00000101919	https://zfin.org/ZDB-GENE-060929-1178	forkhead box J1a [Source:ZFIN;Acc:ZDB-GENE-060929-1178]
2.02932e-179	0.499366	0.321	0.002	2.82034e-175	1	got1l1	ENSDARG00000053644	https://zfin.org/ZDB-GENE-060929-556	glutamic-oxaloacetic transaminase 1-like 1 [Source:ZFIN;Acc:ZDB-GENE-060929-556]
2.32629e-179	0.620253	0.343	0.004	3.23308e-175	1	apba1a	ENSDARG00000103848	https://zfin.org/ZDB-GENE-060526-175	amyloid beta (A4) precursor protein-binding, family A, member 1a [Source:ZFIN;Acc:ZDB-GENE-060526-175]
4.27849e-179	0.529415	0.343	0.004	5.94625e-175	1	elovl4b	ENSDARG00000027495	https://zfin.org/ZDB-GENE-030131-7672	ELOVL fatty acid elongase 4b [Source:ZFIN;Acc:ZDB-GENE-030131-7672]
1.7796e-178	0.58107	0.371	0.006	2.47328e-174	1	xrra1	ENSDARG00000089578	https://zfin.org/ZDB-GENE-101216-2	X-ray radiation resistance associated 1 [Source:ZFIN;Acc:ZDB-GENE-101216-2]
4.27934e-178	0.91	0.593	0.029	5.94742e-174	1	ap3m2	ENSDARG00000016128	https://zfin.org/ZDB-GENE-021022-2	adaptor-related protein complex 3, mu 2 subunit [Source:ZFIN;Acc:ZDB-GENE-021022-2]
6.16731e-177	0.683107	0.429	0.011	8.57133e-173	1	spag6	ENSDARG00000020158	https://zfin.org/ZDB-GENE-040704-53	sperm associated antigen 6 [Source:ZFIN;Acc:ZDB-GENE-040704-53]
1.02067e-176	0.573445	0.4	0.008	1.41853e-172	1	si:ch73-81k8.2	ENSDARG00000096777	https://zfin.org/ZDB-GENE-130531-20	si:ch73-81k8.2 [Source:ZFIN;Acc:ZDB-GENE-130531-20]
1.62871e-176	1.98838	0.964	0.117	2.26358e-172	1	tuba1a	ENSDARG00000001889	https://zfin.org/ZDB-GENE-051127-7	tubulin, alpha 1a [Source:ZFIN;Acc:ZDB-GENE-090507-4]
5.28759e-175	0.505766	0.314	0.002	7.34869e-171	1	cdh8	ENSDARG00000037478	https://zfin.org/ZDB-GENE-130530-597	cadherin 8 [Source:ZFIN;Acc:ZDB-GENE-130530-597]
9.05338e-175	1.11529	0.571	0.028	1.25824e-170	1	cnot10	ENSDARG00000058528	https://zfin.org/ZDB-GENE-060929-368	CCR4-NOT transcription complex, subunit 10 [Source:ZFIN;Acc:ZDB-GENE-060929-368]
1.10739e-174	1.04801	0.65	0.038	1.53905e-170	1	si:dkey-280e21.3	ENSDARG00000056519	https://zfin.org/ZDB-GENE-140106-61	si:dkey-280e21.3 [Source:ZFIN;Acc:ZDB-GENE-140106-61]
1.93936e-174	1.29688	0.829	0.073	2.69533e-170	1	grxcr1	ENSDARG00000069865	https://zfin.org/ZDB-GENE-070424-166	glutaredoxin, cysteine rich 1 [Source:ZFIN;Acc:ZDB-GENE-070424-166]
2.97196e-173	0.456136	0.329	0.003	4.13044e-169	1	cfap52	ENSDARG00000101679	https://zfin.org/ZDB-GENE-050522-296	cilia and flagella associated protein 52 [Source:ZFIN;Acc:ZDB-GENE-050522-296]
7.31481e-171	0.611095	0.386	0.008	1.01661e-166	1	gpr156	ENSDARG00000086215	https://zfin.org/ZDB-GENE-060201-2	G protein-coupled receptor 156 [Source:ZFIN;Acc:ZDB-GENE-060201-2]
1.78816e-168	0.428109	0.286	0.001	2.48518e-164	1	baiap2l2b	ENSDARG00000060933	https://zfin.org/ZDB-GENE-060503-339	BAI1-associated protein 2-like 2b [Source:ZFIN;Acc:ZDB-GENE-060503-339]
2.56048e-168	0.622623	0.457	0.015	3.55855e-164	1	rdh12	ENSDARG00000018069	https://zfin.org/ZDB-GENE-040718-9	retinol dehydrogenase 12 (all-trans/9-cis/11-cis) [Source:ZFIN;Acc:ZDB-GENE-040718-9]
1.10162e-167	0.532602	0.35	0.005	1.53103e-163	1	ttll9	ENSDARG00000062806	https://zfin.org/ZDB-GENE-030131-1582	tubulin tyrosine ligase-like family, member 9 [Source:ZFIN;Acc:ZDB-GENE-030131-1582]
1.4414e-166	0.721106	0.343	0.005	2.00326e-162	1	rprma	ENSDARG00000053383	https://zfin.org/ZDB-GENE-050522-218	reprimo, TP53 dependent G2 arrest mediator candidate a [Source:ZFIN;Acc:ZDB-GENE-050522-218]
4.17151e-166	1.39913	0.543	0.027	5.79756e-162	1	s100s	ENSDARG00000036773	https://zfin.org/ZDB-GENE-040822-31	S100 calcium binding protein S [Source:ZFIN;Acc:ZDB-GENE-040822-31]
1.18927e-164	1.60639	0.779	0.071	1.65284e-160	1	tuba1c	ENSDARG00000055216	https://zfin.org/ZDB-GENE-061114-1	tubulin, alpha 1c [Source:ZFIN;Acc:ZDB-GENE-061114-1]
1.95682e-164	0.777102	0.514	0.022	2.71959e-160	1	lrriq1	ENSDARG00000093781	https://zfin.org/ZDB-GENE-050419-235	leucine-rich repeats and IQ motif containing 1 [Source:ZFIN;Acc:ZDB-GENE-050419-235]
2.99189e-164	0.480032	0.314	0.003	4.15813e-160	1	atp6v1c2	ENSDARG00000070440	https://zfin.org/ZDB-GENE-131127-65	ATPase, H+ transporting, lysosomal, V1 subunit C2 [Source:ZFIN;Acc:ZDB-GENE-131127-65]
2.78459e-162	0.490745	0.321	0.004	3.87003e-158	1	cfap58	ENSDARG00000069435	https://zfin.org/ZDB-GENE-060929-128	cilia and flagella associated protein 58 [Source:ZFIN;Acc:ZDB-GENE-060929-128]
1.06493e-160	0.511205	0.343	0.006	1.48004e-156	1	clic5b	ENSDARG00000070584	https://zfin.org/ZDB-GENE-040426-2542	chloride intracellular channel 5b [Source:ZFIN;Acc:ZDB-GENE-040426-2542]
1.43301e-160	0.611752	0.329	0.005	1.9916e-156	1	tbata	ENSDARG00000067831	https://zfin.org/ZDB-GENE-121030-4	thymus, brain and testes associated [Source:ZFIN;Acc:ZDB-GENE-121030-4]
4.38268e-160	0.388663	0.286	0.002	6.09104e-156	1	parp6b	ENSDARG00000070473	https://zfin.org/ZDB-GENE-080219-1	poly (ADP-ribose) polymerase family, member 6b [Source:ZFIN;Acc:ZDB-GENE-080219-1]
4.80492e-160	0.561981	0.371	0.008	6.67788e-156	1	lrrc51	ENSDARG00000040668	https://zfin.org/ZDB-GENE-060929-962	leucine rich repeat containing 51 [Source:ZFIN;Acc:ZDB-GENE-060929-962]
7.41217e-160	0.412844	0.279	0.002	1.03014e-155	1	osbp2	ENSDARG00000053487	https://zfin.org/ZDB-GENE-091113-18	oxysterol binding protein 2 [Source:ZFIN;Acc:ZDB-GENE-091113-18]
1.21505e-156	0.501233	0.35	0.007	1.68868e-152	1	cfap53	ENSDARG00000100892	https://zfin.org/ZDB-GENE-060503-508	cilia and flagella associated protein 53 [Source:ZFIN;Acc:ZDB-GENE-060503-508]
2.36062e-156	0.635885	0.443	0.016	3.28079e-152	1	efcab1	ENSDARG00000061377	https://zfin.org/ZDB-GENE-040914-40	EF-hand calcium binding domain 1 [Source:ZFIN;Acc:ZDB-GENE-040914-40]
1.21685e-154	0.533732	0.314	0.004	1.69118e-150	1	gltpb	ENSDARG00000077962	https://zfin.org/ZDB-GENE-091118-80	glycolipid transfer protein b [Source:ZFIN;Acc:ZDB-GENE-091118-80]
4.28692e-154	0.438049	0.293	0.003	5.95796e-150	1	phactr3a	ENSDARG00000058243	https://zfin.org/ZDB-GENE-080220-4	phosphatase and actin regulator 3a [Source:ZFIN;Acc:ZDB-GENE-080220-4]
4.35148e-154	0.423017	0.257	0.001	6.04769e-150	1	zgc:153142	ENSDARG00000069363	https://zfin.org/ZDB-GENE-061013-507	zgc:153142 [Source:ZFIN;Acc:ZDB-GENE-061013-507]
4.65682e-153	1.14167	0.7	0.058	6.47206e-149	1	hsbp1a	ENSDARG00000069425	https://zfin.org/ZDB-GENE-050320-136	heat shock factor binding protein 1a [Source:ZFIN;Acc:ZDB-GENE-050320-136]
7.04191e-152	0.690191	0.414	0.014	9.78685e-148	1	atp1a3b	ENSDARG00000104139	https://zfin.org/ZDB-GENE-001212-8	ATPase, Na+/K+ transporting, alpha 3b polypeptide [Source:ZFIN;Acc:ZDB-GENE-001212-8]
8.2121e-152	1.5799	0.979	0.135	1.14132e-147	1	rbm24a	ENSDARG00000102995	https://zfin.org/ZDB-GENE-040628-1	RNA binding motif protein 24a [Source:ZFIN;Acc:ZDB-GENE-040628-1]
5.12513e-151	0.722704	0.514	0.026	7.1229e-147	1	itm2cb	ENSDARG00000039650	https://zfin.org/ZDB-GENE-030131-7806	integral membrane protein 2Cb [Source:ZFIN;Acc:ZDB-GENE-030131-7806]
7.55815e-151	0.511063	0.293	0.003	1.05043e-146	1	iqub	ENSDARG00000061899	https://zfin.org/ZDB-GENE-110421-1	IQ motif and ubiquitin domain containing [Source:ZFIN;Acc:ZDB-GENE-110421-1]
2.26644e-149	0.923328	0.55	0.032	3.1499e-145	1	si:ch211-262i1.2	ENSDARG00000100639	https://zfin.org/ZDB-GENE-141216-186	si:ch211-262i1.2 [Source:ZFIN;Acc:ZDB-GENE-141216-186]
4.94458e-149	0.641746	0.364	0.009	6.87198e-145	1	srpk2	ENSDARG00000029368	https://zfin.org/ZDB-GENE-131105-1	SRSF protein kinase 2 [Source:ZFIN;Acc:ZDB-GENE-131105-1]
8.61721e-149	0.424114	0.3	0.004	1.19762e-144	1	iqck	ENSDARG00000076831	https://zfin.org/ZDB-GENE-081022-109	IQ motif containing K [Source:ZFIN;Acc:ZDB-GENE-081022-109]
2.40902e-145	0.609871	0.407	0.014	3.34806e-141	1	chrna9	ENSDARG00000054680	https://zfin.org/ZDB-GENE-090312-63	cholinergic receptor, nicotinic, alpha 9 [Source:ZFIN;Acc:ZDB-GENE-090312-63]
3.86268e-144	0.403193	0.271	0.003	5.36835e-140	1	ttc25	ENSDARG00000058140	https://zfin.org/ZDB-GENE-040426-995	tetratricopeptide repeat domain 25 [Source:ZFIN;Acc:ZDB-GENE-040426-995]
4.00261e-144	0.424774	0.271	0.003	5.56283e-140	1	si:ch211-38m6.6	ENSDARG00000076959	https://zfin.org/ZDB-GENE-070705-179	si:ch211-38m6.6 [Source:ZFIN;Acc:ZDB-GENE-070705-179]
4.42463e-144	0.855922	0.429	0.017	6.14935e-140	1	tekt3	ENSDARG00000045038	https://zfin.org/ZDB-GENE-080130-2	tektin 3 [Source:ZFIN;Acc:ZDB-GENE-080130-2]
1.93207e-143	0.618983	0.457	0.02	2.68519e-139	1	tmem107l	ENSDARG00000088398	https://zfin.org/ZDB-GENE-090313-269	transmembrane protein 107 like [Source:ZFIN;Acc:ZDB-GENE-090313-269]
7.56238e-142	0.502325	0.364	0.01	1.05102e-137	1	CFAP70	ENSDARG00000058508	https://zfin.org/ZDB-GENE-091204-50	si:dkey-254e1.1 [Source:ZFIN;Acc:ZDB-GENE-091204-50]
9.72598e-142	0.397275	0.279	0.003	1.35172e-137	1	ak8	ENSDARG00000030961	https://zfin.org/ZDB-GENE-050522-275	adenylate kinase 8 [Source:ZFIN;Acc:ZDB-GENE-050522-275]
1.80918e-141	0.800769	0.471	0.023	2.51439e-137	1	efcab2	ENSDARG00000074323	https://zfin.org/ZDB-GENE-070521-5	EF-hand calcium binding domain 2 [Source:ZFIN;Acc:ZDB-GENE-070521-5]
3.95875e-140	0.526017	0.321	0.007	5.50187e-136	1	fscn2b	ENSDARG00000074396	https://zfin.org/ZDB-GENE-040426-1740	fascin actin-bundling protein 2b, retinal [Source:ZFIN;Acc:ZDB-GENE-040426-1740]
1.55907e-137	0.606844	0.379	0.013	2.1668e-133	1	lmo7b	ENSDARG00000053535	https://zfin.org/ZDB-GENE-060825-242	LIM domain 7b [Source:ZFIN;Acc:ZDB-GENE-060825-242]
1.64796e-135	0.326842	0.229	0.001	2.29033e-131	1	lrrc6	ENSDARG00000053318	https://zfin.org/ZDB-GENE-040827-2	leucine rich repeat containing 6 [Source:ZFIN;Acc:ZDB-GENE-040827-2]
2.20118e-135	0.524777	0.371	0.012	3.05919e-131	1	capslb	ENSDARG00000003414	https://zfin.org/ZDB-GENE-050417-298	calcyphosine-like b [Source:ZFIN;Acc:ZDB-GENE-050417-298]
2.67382e-135	0.537921	0.329	0.008	3.71608e-131	1	cnrip1a	ENSDARG00000091683	https://zfin.org/ZDB-GENE-040801-126	cannabinoid receptor interacting protein 1a [Source:ZFIN;Acc:ZDB-GENE-040801-126]
4.44472e-135	0.997994	0.6	0.045	6.17728e-131	1	pou4f1	ENSDARG00000005559	https://zfin.org/ZDB-GENE-000523-2	POU class 4 homeobox 1 [Source:ZFIN;Acc:ZDB-GENE-000523-2]
7.64132e-135	0.550272	0.3	0.006	1.06199e-130	1	skor1a	ENSDARG00000069030	https://zfin.org/ZDB-GENE-080722-5	SKI family transcriptional corepressor 1a [Source:ZFIN;Acc:ZDB-GENE-080722-5]
1.7244e-134	0.666888	0.443	0.021	2.39657e-130	1	rcan3	ENSDARG00000032623	https://zfin.org/ZDB-GENE-040718-445	regulator of calcineurin 3 [Source:ZFIN;Acc:ZDB-GENE-040718-445]
5.78142e-133	0.491579	0.279	0.004	8.03501e-129	1	ndufa4	ENSDARG00000056108	https://zfin.org/ZDB-GENE-040426-1962	NADH dehydrogenase (ubiquinone) 1 alpha subcomplex, 4 [Source:ZFIN;Acc:ZDB-GENE-040426-1962]
9.37747e-133	0.619606	0.407	0.017	1.30328e-128	1	prdm1a	ENSDARG00000002445	https://zfin.org/ZDB-GENE-030131-2193	PR domain containing 1a, with ZNF domain [Source:ZFIN;Acc:ZDB-GENE-030131-2193]
4.54104e-132	0.339069	0.236	0.002	6.31114e-128	1	zgc:153146	ENSDARG00000037142	https://zfin.org/ZDB-GENE-060825-339	zgc:153146 [Source:ZFIN;Acc:ZDB-GENE-060825-339]
1.02481e-131	0.41996	0.257	0.003	1.42428e-127	1	si:ch211-93n23.7	ENSDARG00000089552	https://zfin.org/ZDB-GENE-141222-51	si:ch211-93n23.7 [Source:ZFIN;Acc:ZDB-GENE-141222-51]
1.46231e-131	0.392981	0.286	0.005	2.03232e-127	1	CFAP99	ENSDARG00000097485	https://zfin.org/	cilia and flagella associated protein 99 [Source:HGNC Symbol;Acc:HGNC:51180]
2.32519e-131	3.2519	0.964	0.21	3.23154e-127	1	anxa5a	ENSDARG00000026406	https://zfin.org/ZDB-GENE-080220-29	annexin A5a [Source:ZFIN;Acc:ZDB-GENE-080220-29]
1.29316e-130	0.373945	0.25	0.003	1.79723e-126	1	axdnd1	ENSDARG00000062355	https://zfin.org/ZDB-GENE-050208-341	axonemal dynein light chain domain containing 1 [Source:ZFIN;Acc:ZDB-GENE-050208-341]
1.26961e-129	0.446857	0.307	0.007	1.7645e-125	1	amph	ENSDARG00000007663	https://zfin.org/ZDB-GENE-040426-1711	amphiphysin [Source:ZFIN;Acc:ZDB-GENE-040426-1711]
1.29419e-127	0.899616	0.643	0.058	1.79866e-123	1	si:dkeyp-122d12.1	ENSDARG00000096684	https://zfin.org/ZDB-GENE-131126-80	si:dkeyp-122d12.1 [Source:ZFIN;Acc:ZDB-GENE-131126-80]
5.38796e-127	0.647826	0.514	0.033	7.48819e-123	1	atp6v1c1b	ENSDARG00000035880	https://zfin.org/ZDB-GENE-041010-104	ATPase, H+ transporting, lysosomal, V1 subunit C1b [Source:ZFIN;Acc:ZDB-GENE-041010-104]
9.15954e-127	1.47344	0.843	0.121	1.27299e-122	1	prdx1	ENSDARG00000058734	https://zfin.org/ZDB-GENE-050320-35	peroxiredoxin 1 [Source:ZFIN;Acc:ZDB-GENE-050320-35]
1.62056e-126	0.409033	0.214	0.001	2.25225e-122	1	capga	ENSDARG00000035560	https://zfin.org/ZDB-GENE-060531-6	capping protein (actin filament), gelsolin-like a [Source:ZFIN;Acc:ZDB-GENE-060531-6]
8.86411e-126	0.351905	0.243	0.003	1.23193e-121	1	KIF9	ENSDARG00000031693	https://zfin.org/ZDB-GENE-160728-129	si:dkey-86l18.8 [Source:ZFIN;Acc:ZDB-GENE-160728-129]
1.15368e-125	0.504755	0.379	0.015	1.60339e-121	1	atp6v0cb	ENSDARG00000036577	https://zfin.org/ZDB-GENE-030131-4127	ATPase, H+ transporting, lysosomal, V0 subunit cb [Source:ZFIN;Acc:ZDB-GENE-030131-4127]
3.48141e-125	0.60214	0.314	0.009	4.83846e-121	1	dpysl3	ENSDARG00000002587	https://zfin.org/ZDB-GENE-050720-2	dihydropyrimidinase-like 3 [Source:ZFIN;Acc:ZDB-GENE-050720-2]
9.41186e-125	0.380082	0.279	0.005	1.30806e-120	1	upf3a	ENSDARG00000069297	https://zfin.org/ZDB-GENE-060721-2	UPF3 regulator of nonsense transcripts homolog A (yeast) [Source:ZFIN;Acc:ZDB-GENE-060721-2]
9.58735e-125	0.558505	0.364	0.014	1.33245e-120	1	si:ch73-111k22.3	ENSDARG00000103492	https://zfin.org/ZDB-GENE-141212-371	si:ch73-111k22.3 [Source:ZFIN;Acc:ZDB-GENE-141212-371]
4.60987e-123	0.39411	0.271	0.005	6.4068e-119	1	drc3	ENSDARG00000041300	https://zfin.org/ZDB-GENE-061103-349	dynein regulatory complex subunit 3 [Source:ZFIN;Acc:ZDB-GENE-061103-349]
1.14295e-122	0.542364	0.443	0.024	1.58847e-118	1	HSPB11	ENSDARG00000067777	https://zfin.org/ZDB-GENE-061215-15	zgc:158640 [Source:ZFIN;Acc:ZDB-GENE-061215-15]
7.94779e-122	0.576866	0.364	0.014	1.10458e-117	1	si:dkey-70b23.2	ENSDARG00000093783	https://zfin.org/ZDB-GENE-100922-241	si:dkey-70b23.2 [Source:ZFIN;Acc:ZDB-GENE-100922-241]
8.32117e-122	0.323104	0.207	0.001	1.15648e-117	1	mycbpap	ENSDARG00000069194	https://zfin.org/ZDB-GENE-080923-1	mycbp associated protein [Source:ZFIN;Acc:ZDB-GENE-080923-1]
2.60182e-121	0.508196	0.193	0	3.616e-117	1	tmc2a	ENSDARG00000033104	https://zfin.org/ZDB-GENE-060526-280	transmembrane channel-like 2a [Source:ZFIN;Acc:ZDB-GENE-060526-280]
4.62549e-119	0.418664	0.293	0.007	6.4285e-115	1	morn2	ENSDARG00000071360	https://zfin.org/ZDB-GENE-060825-230	MORN repeat containing 2 [Source:ZFIN;Acc:ZDB-GENE-060825-230]
6.6566e-119	0.445439	0.307	0.009	9.25134e-115	1	micall2a	ENSDARG00000102366	https://zfin.org/ZDB-GENE-030131-5409	mical-like 2a [Source:ZFIN;Acc:ZDB-GENE-030131-5409]
7.77554e-118	1.618	0.971	0.204	1.08064e-113	1	cabp2b	ENSDARG00000052277	https://zfin.org/ZDB-GENE-081028-55	calcium binding protein 2b [Source:ZFIN;Acc:ZDB-GENE-081028-55]
2.17474e-115	0.454993	0.321	0.011	3.02246e-111	1	lrrc23	ENSDARG00000006174	https://zfin.org/ZDB-GENE-041010-153	leucine rich repeat containing 23 [Source:ZFIN;Acc:ZDB-GENE-041010-153]
4.75672e-115	0.947339	0.55	0.046	6.61089e-111	1	abhd2b	ENSDARG00000045804	https://zfin.org/ZDB-GENE-061027-74	abhydrolase domain containing 2b [Source:ZFIN;Acc:ZDB-GENE-061027-74]
5.90849e-115	0.547926	0.357	0.015	8.21162e-111	1	si:dkey-246i21.1	ENSDARG00000093492	https://zfin.org/ZDB-GENE-090313-271	si:dkey-246i21.1 [Source:ZFIN;Acc:ZDB-GENE-090313-271]
6.06283e-115	2.1075	0.986	0.27	8.42612e-111	1	si:dkey-16p21.8	ENSDARG00000096849	https://zfin.org/ZDB-GENE-131121-428	si:dkey-16p21.8 [Source:ZFIN;Acc:ZDB-GENE-131121-428]
2.10615e-114	1.46696	0.893	0.162	2.92712e-110	1	si:dkeyp-110e4.11	ENSDARG00000071585	https://zfin.org/ZDB-GENE-070424-267	si:dkeyp-110e4.11 [Source:ZFIN;Acc:ZDB-GENE-070424-267]
2.70526e-114	1.00716	0.807	0.109	3.75977e-110	1	si:ch211-248e11.2	ENSDARG00000058940	https://zfin.org/ZDB-GENE-081104-197	si:ch211-248e11.2 [Source:ZFIN;Acc:ZDB-GENE-081104-197]
1.40994e-113	0.920706	0.643	0.065	1.95954e-109	1	hsp90aa1.2	ENSDARG00000024746	https://zfin.org/ZDB-GENE-031001-3	heat shock protein 90, alpha (cytosolic), class A member 1, tandem duplicate 2 [Source:ZFIN;Acc:ZDB-GENE-031001-3]
1.79335e-113	0.475842	0.286	0.008	2.4924e-109	1	ccdc103	ENSDARG00000053455	https://zfin.org/ZDB-GENE-040718-253	coiled-coil domain containing 103 [Source:ZFIN;Acc:ZDB-GENE-040718-253]
8.91267e-112	0.972627	0.779	0.103	1.23868e-107	1	adipor1a	ENSDARG00000002912	https://zfin.org/ZDB-GENE-040718-169	adiponectin receptor 1a [Source:ZFIN;Acc:ZDB-GENE-040718-169]
9.53092e-112	0.956771	0.736	0.092	1.32461e-107	1	grtp1a	ENSDARG00000029936	https://zfin.org/ZDB-GENE-040426-2733	growth hormone regulated TBC protein 1a [Source:ZFIN;Acc:ZDB-GENE-040426-2733]
1.81507e-111	0.837756	0.471	0.033	2.52259e-107	1	barhl1a	ENSDARG00000035508	https://zfin.org/ZDB-GENE-050417-212	BarH-like homeobox 1a [Source:ZFIN;Acc:ZDB-GENE-050417-212]
6.1849e-111	2.9265	0.993	0.3	8.59578e-107	1	zgc:173593	ENSDARG00000077360	https://zfin.org/ZDB-GENE-071004-57	zgc:173593 [Source:ZFIN;Acc:ZDB-GENE-071004-57]
6.94247e-111	0.336255	0.229	0.003	9.64865e-107	1	gstp2	ENSDARG00000103019	https://zfin.org/ZDB-GENE-050601-1	glutathione S-transferase pi 2 [Source:ZFIN;Acc:ZDB-GENE-050601-1]
2.29698e-110	0.718202	0.564	0.049	3.19234e-106	1	c10h21orf59	ENSDARG00000035332	https://zfin.org/ZDB-GENE-040930-8	c10h21orf59 homolog (H. sapiens) [Source:ZFIN;Acc:ZDB-GENE-040930-8]
3.57854e-109	0.435545	0.3	0.01	4.97346e-105	1	pih1d2	ENSDARG00000014849	https://zfin.org/ZDB-GENE-041212-54	PIH1 domain containing 2 [Source:ZFIN;Acc:ZDB-GENE-041212-54]
4.21218e-109	0.483075	0.286	0.009	5.85409e-105	1	rasd1	ENSDARG00000019274	https://zfin.org/ZDB-GENE-040426-1473	RAS, dexamethasone-induced 1 [Source:ZFIN;Acc:ZDB-GENE-040426-1473]
1.13112e-108	0.287389	0.193	0.001	1.57203e-104	1	si:dkey-100n19.2	ENSDARG00000075206	https://zfin.org/ZDB-GENE-120711-2	si:dkey-100n19.2 [Source:ZFIN;Acc:ZDB-GENE-120711-2]
4.84689e-108	0.312569	0.229	0.004	6.7362e-104	1	ap1s2	ENSDARG00000058504	https://zfin.org/ZDB-GENE-030131-5448	adaptor-related protein complex 1, sigma 2 subunit [Source:ZFIN;Acc:ZDB-GENE-030131-5448]
5.38725e-108	0.420016	0.25	0.005	7.4872e-104	1	ush1c	ENSDARG00000051876	https://zfin.org/ZDB-GENE-060312-41	Usher syndrome 1C [Source:ZFIN;Acc:ZDB-GENE-060312-41]
1.31168e-107	0.332903	0.179	0.001	1.82297e-103	1	fam131c	ENSDARG00000037320	https://zfin.org/ZDB-GENE-050706-119	family with sequence similarity 131, member C [Source:ZFIN;Acc:ZDB-GENE-050706-119]
7.80648e-107	0.307272	0.221	0.003	1.08494e-102	1	dyx1c1	ENSDARG00000099161	https://zfin.org/ZDB-GENE-040426-1892	dyslexia susceptibility 1 candidate 1 [Source:ZFIN;Acc:ZDB-GENE-040426-1892]
3.0116e-105	0.473008	0.364	0.018	4.18552e-101	1	si:ch1073-416d2.4	ENSDARG00000101867	https://zfin.org/ZDB-GENE-131121-564	si:ch1073-416d2.4 [Source:ZFIN;Acc:ZDB-GENE-131121-564]
8.7183e-105	0.758317	0.571	0.055	1.21167e-100	1	bdnf	ENSDARG00000018817	https://zfin.org/ZDB-GENE-000412-1	brain-derived neurotrophic factor [Source:ZFIN;Acc:ZDB-GENE-000412-1]
1.04947e-104	0.580295	0.429	0.028	1.45856e-100	1	tmem178b	ENSDARG00000006747	https://zfin.org/ZDB-GENE-040718-92	transmembrane protein 178B [Source:ZFIN;Acc:ZDB-GENE-040718-92]
1.07168e-103	0.334259	0.221	0.004	1.48943e-99	1	OSCP1	ENSDARG00000101888	https://zfin.org/	organic solute carrier partner 1 [Source:HGNC Symbol;Acc:HGNC:29971]
9.90406e-103	0.384403	0.271	0.008	1.37647e-98	1	dnajb13	ENSDARG00000043157	https://zfin.org/ZDB-GENE-040910-4	DnaJ (Hsp40) homolog, subfamily B, member 13 [Source:ZFIN;Acc:ZDB-GENE-040910-4]
1.67422e-102	0.354921	0.214	0.003	2.32683e-98	1	zgc:193811	ENSDARG00000076745	https://zfin.org/ZDB-GENE-081022-43	zgc:193811 [Source:ZFIN;Acc:ZDB-GENE-081022-43]
4.244e-101	0.399637	0.264	0.008	5.89831e-97	1	klhl26	ENSDARG00000053876	https://zfin.org/ZDB-GENE-030131-5975	kelch-like family member 26 [Source:ZFIN;Acc:ZDB-GENE-030131-5975]
7.27408e-101	1.36044	0.95	0.229	1.01095e-96	1	rnasekb	ENSDARG00000104458	https://zfin.org/ZDB-GENE-060825-160	ribonuclease, RNase K b [Source:ZFIN;Acc:ZDB-GENE-060825-160]
8.98827e-101	0.313514	0.207	0.003	1.24919e-96	1	ppil6	ENSDARG00000042157	https://zfin.org/ZDB-GENE-050522-70	peptidylprolyl isomerase (cyclophilin)-like 6 [Source:ZFIN;Acc:ZDB-GENE-050522-70]
2.03946e-100	0.287004	0.186	0.002	2.83445e-96	1	dytn	ENSDARG00000071025	https://zfin.org/ZDB-GENE-070124-2	dystrotelin [Source:ZFIN;Acc:ZDB-GENE-070124-2]
4.29613e-99	0.452271	0.25	0.007	5.97076e-95	1	desma	ENSDARG00000058656	https://zfin.org/ZDB-GENE-980526-221	desmin a [Source:ZFIN;Acc:ZDB-GENE-980526-221]
5.21156e-99	0.378067	0.25	0.007	7.24302e-95	1	spata6l	ENSDARG00000004874	https://zfin.org/ZDB-GENE-040426-1369	spermatogenesis associated 6-like [Source:ZFIN;Acc:ZDB-GENE-040426-1369]
5.73461e-99	0.325551	0.243	0.006	7.96996e-95	1	fam188b2	ENSDARG00000069867	https://zfin.org/ZDB-GENE-140127-1	family with sequence similarity 188, member B2 [Source:ZFIN;Acc:ZDB-GENE-140127-1]
9.1164e-99	0.578481	0.471	0.038	1.267e-94	1	cluap1	ENSDARG00000079110	https://zfin.org/ZDB-GENE-040426-1943	clusterin associated protein 1 [Source:ZFIN;Acc:ZDB-GENE-040426-1943]
9.27905e-99	0.265219	0.171	0.001	1.2896e-94	1	myo3a	ENSDARG00000010186	https://zfin.org/ZDB-GENE-041026-4	myosin IIIA [Source:ZFIN;Acc:ZDB-GENE-041026-4]
1.04996e-98	0.645711	0.536	0.05	1.45923e-94	1	ap3d1	ENSDARG00000071424	https://zfin.org/ZDB-GENE-050208-437	adaptor-related protein complex 3, delta 1 subunit [Source:ZFIN;Acc:ZDB-GENE-050208-437]
3.95844e-98	0.340573	0.193	0.002	5.50144e-94	1	si:ch211-198b3.4	ENSDARG00000089110	https://zfin.org/ZDB-GENE-121119-1	si:ch211-198b3.4 [Source:ZFIN;Acc:ZDB-GENE-121119-1]
1.18698e-97	0.813537	0.7	0.092	1.64966e-93	1	dnal1	ENSDARG00000034042	https://zfin.org/ZDB-GENE-040801-178	dynein, axonemal, light chain 1 [Source:ZFIN;Acc:ZDB-GENE-040801-178]
1.06669e-94	1.23811	0.957	0.235	1.48249e-90	1	TSTD1	ENSDARG00000071567	https://zfin.org/ZDB-GENE-081107-63	si:dkey-34l15.1 [Source:ZFIN;Acc:ZDB-GENE-081107-63]
6.44358e-94	2.05065	1	0.495	8.95529e-90	1	si:ch211-243g18.2	ENSDARG00000044261	https://zfin.org/ZDB-GENE-030131-2830	si:ch211-243g18.2 [Source:ZFIN;Acc:ZDB-GENE-030131-2830]
6.60686e-94	3.62501	1	0.597	9.18222e-90	1	gstp1	ENSDARG00000104068	https://zfin.org/ZDB-GENE-020806-4	glutathione S-transferase pi 1 [Source:ZFIN;Acc:ZDB-GENE-020806-4]
7.6403e-94	0.46853	0.35	0.02	1.06185e-89	1	tpi1a	ENSDARG00000025012	https://zfin.org/ZDB-GENE-020416-3	triosephosphate isomerase 1a [Source:ZFIN;Acc:ZDB-GENE-020416-3]
7.64449e-94	0.324825	0.186	0.002	1.06243e-89	1	si:ch211-189e2.2	ENSDARG00000090489	https://zfin.org/ZDB-GENE-131121-624	si:ch211-189e2.2 [Source:ZFIN;Acc:ZDB-GENE-131121-624]
8.34553e-94	0.343175	0.221	0.005	1.15986e-89	1	stk32a	ENSDARG00000079499	https://zfin.org/ZDB-GENE-091204-271	serine/threonine kinase 32A [Source:ZFIN;Acc:ZDB-GENE-091204-271]
8.88501e-94	0.250216	0.143	0	1.23484e-89	1	cfap100	ENSDARG00000038538	https://zfin.org/ZDB-GENE-060929-352	cilia and flagella associated protein 100 [Source:ZFIN;Acc:ZDB-GENE-060929-352]
1.36895e-93	0.266703	0.15	0	1.90256e-89	1	si:dkeyp-82a1.8	ENSDARG00000095539	https://zfin.org/ZDB-GENE-081104-479	si:dkeyp-82a1.8 [Source:ZFIN;Acc:ZDB-GENE-081104-479]
2.56608e-92	0.498333	0.393	0.027	3.56633e-88	1	dnajc12	ENSDARG00000086691	https://zfin.org/ZDB-GENE-070801-3	DnaJ (Hsp40) homolog, subfamily C, member 12 [Source:ZFIN;Acc:ZDB-GENE-070801-3]
3.30432e-92	0.318749	0.193	0.003	4.59234e-88	1	klhl30	ENSDARG00000076094	https://zfin.org/ZDB-GENE-100913-2	kelch-like family member 30 [Source:ZFIN;Acc:ZDB-GENE-100913-2]
3.91963e-92	0.371747	0.193	0.003	5.44751e-88	1	cfap57	ENSDARG00000058090	https://zfin.org/ZDB-GENE-110411-266	cilia and flagella associated protein 57 [Source:ZFIN;Acc:ZDB-GENE-110411-266]
4.40773e-92	0.304364	0.193	0.003	6.12586e-88	1	nsfa	ENSDARG00000007654	https://zfin.org/ZDB-GENE-030616-37	N-ethylmaleimide-sensitive factor a [Source:ZFIN;Acc:ZDB-GENE-030616-37]
1.78642e-90	0.33448	0.164	0.001	2.48276e-86	1	zgc:113691	ENSDARG00000038898	https://zfin.org/ZDB-GENE-050220-7	zgc:113691 [Source:ZFIN;Acc:ZDB-GENE-050220-7]
2.98727e-90	0.773317	0.693	0.096	4.15171e-86	1	rab3ip	ENSDARG00000101908	https://zfin.org/ZDB-GENE-050522-323	RAB3A interacting protein (rabin3) [Source:ZFIN;Acc:ZDB-GENE-050522-323]
3.75859e-90	0.498799	0.393	0.028	5.22369e-86	1	CABZ01118004.1	ENSDARG00000104620	https://zfin.org/
8.78769e-90	1.35801	0.993	0.36	1.22131e-85	1	clta	ENSDARG00000045618	https://zfin.org/ZDB-GENE-040426-1986	clathrin, light chain A [Source:ZFIN;Acc:ZDB-GENE-040426-1986]
5.47927e-89	3.90347	1	0.903	7.61508e-85	1	s100t	ENSDARG00000055589	https://zfin.org/ZDB-GENE-050320-61	S100 calcium binding protein T [Source:ZFIN;Acc:ZDB-GENE-050320-61]
6.15807e-89	0.590929	0.371	0.025	8.55848e-85	1	PSMB10	ENSDARG00000043781	https://zfin.org/ZDB-GENE-040718-278	zgc:92791 [Source:ZFIN;Acc:ZDB-GENE-040718-278]
9.85886e-89	2.91026	1	0.753	1.37018e-84	1	zgc:109934	ENSDARG00000094210	https://zfin.org/ZDB-GENE-050522-428	zgc:109934 [Source:ZFIN;Acc:ZDB-GENE-050522-428]
4.94605e-88	3.55897	1	0.998	6.87402e-84	1	pvalb8	ENSDARG00000037790	https://zfin.org/ZDB-GENE-030805-3	parvalbumin 8 [Source:ZFIN;Acc:ZDB-GENE-030805-3]
5.42124e-88	0.279182	0.171	0.002	7.53444e-84	1	atl1	ENSDARG00000060481	https://zfin.org/ZDB-GENE-030131-8003	atlastin GTPase 1 [Source:ZFIN;Acc:ZDB-GENE-030131-8003]
8.68381e-88	1.6295	1	0.399	1.20688e-83	1	gsto2	ENSDARG00000033285	https://zfin.org/ZDB-GENE-041114-67	glutathione S-transferase omega 2 [Source:ZFIN;Acc:ZDB-GENE-041114-67]
9.00814e-88	0.355631	0.243	0.008	1.25195e-83	1	spata17	ENSDARG00000054414	https://zfin.org/ZDB-GENE-111214-1	spermatogenesis associated 17 [Source:ZFIN;Acc:ZDB-GENE-111214-1]
2.1452e-87	1.77328	1	0.508	2.9814e-83	1	calm1a	ENSDARG00000021811	https://zfin.org/ZDB-GENE-030131-5590	calmodulin 1a [Source:ZFIN;Acc:ZDB-GENE-030131-8308]
4.21174e-87	0.266072	0.164	0.002	5.85347e-83	1	fam166b	ENSDARG00000100292	https://zfin.org/ZDB-GENE-070209-41	family with sequence similarity 166, member B [Source:ZFIN;Acc:ZDB-GENE-070209-41]
4.9642e-87	0.296466	0.164	0.002	6.89924e-83	1	fbxo16	ENSDARG00000033949	https://zfin.org/ZDB-GENE-041015-747	F-box protein 16 [Source:ZFIN;Acc:ZDB-GENE-041015-747]
7.61549e-87	0.384222	0.3	0.015	1.0584e-82	1	tpgs2	ENSDARG00000011926	https://zfin.org/ZDB-GENE-040704-49	tubulin polyglutamylase complex subunit 2 [Source:ZFIN;Acc:ZDB-GENE-040704-49]
8.09204e-87	0.790477	0.714	0.107	1.12463e-82	1	gnai1	ENSDARG00000021647	https://zfin.org/ZDB-GENE-040426-1310	guanine nucleotide binding protein (G protein), alpha inhibiting activity polypeptide 1 [Source:ZFIN;Acc:ZDB-GENE-040426-1310]
2.13928e-86	0.28287	0.179	0.003	2.97318e-82	1	CABZ01074816.1	ENSDARG00000091489	https://zfin.org/
3.71779e-86	1.14362	0.807	0.148	5.16698e-82	1	gcnt4a	ENSDARG00000035198	https://zfin.org/ZDB-GENE-030131-3231	glucosaminyl (N-acetyl) transferase 4, core 2, a [Source:ZFIN;Acc:ZDB-GENE-030131-3231]
1.07529e-85	0.324025	0.243	0.009	1.49443e-81	1	fancg	ENSDARG00000024967	https://zfin.org/ZDB-GENE-050417-103	Fanconi anemia, complementation group G [Source:ZFIN;Acc:ZDB-GENE-050417-103]
4.00048e-85	0.724214	0.571	0.068	5.55986e-81	1	nme7	ENSDARG00000056193	https://zfin.org/ZDB-GENE-000210-35	NME/NM23 family member 7 [Source:ZFIN;Acc:ZDB-GENE-000210-35]
5.05609e-85	1.22354	0.957	0.261	7.02695e-81	1	mycbp	ENSDARG00000091001	https://zfin.org/ZDB-GENE-060331-97	c-myc binding protein [Source:ZFIN;Acc:ZDB-GENE-060331-97]
1.05651e-84	0.256467	0.143	0.001	1.46834e-80	1	maats1	ENSDARG00000006292	https://zfin.org/ZDB-GENE-070912-489	MYCBP-associated, testis expressed 1 [Source:ZFIN;Acc:ZDB-GENE-070912-489]
9.18121e-84	0.600061	0.457	0.043	1.27601e-79	1	laptm4b	ENSDARG00000035870	https://zfin.org/ZDB-GENE-030616-616	lysosomal protein transmembrane 4 beta [Source:ZFIN;Acc:ZDB-GENE-030616-616]
1.61934e-82	0.621814	0.507	0.055	2.25056e-78	1	aifm4	ENSDARG00000061634	https://zfin.org/ZDB-GENE-070112-2282	apoptosis-inducing factor, mitochondrion-associated, 4 [Source:ZFIN;Acc:ZDB-GENE-070112-2282]
3.71738e-82	0.353837	0.271	0.013	5.16642e-78	1	mapk15	ENSDARG00000101987	https://zfin.org/
5.07964e-82	0.443143	0.279	0.014	7.05968e-78	1	si:ch73-103b9.2	ENSDARG00000092489	https://zfin.org/ZDB-GENE-070705-199	si:ch73-103b9.2 [Source:ZFIN;Acc:ZDB-GENE-070705-199]
5.43157e-82	1.44108	1	0.571	7.5488e-78	1	gapdhs	ENSDARG00000039914	https://zfin.org/ZDB-GENE-020913-1	glyceraldehyde-3-phosphate dehydrogenase, spermatogenic [Source:ZFIN;Acc:ZDB-GENE-020913-1]
6.01061e-82	0.334203	0.193	0.004	8.35355e-78	1	spag1b	ENSDARG00000069499	https://zfin.org/ZDB-GENE-061013-512	sperm associated antigen 1b [Source:ZFIN;Acc:ZDB-GENE-061013-512]
1.05616e-81	0.367826	0.229	0.008	1.46785e-77	1	ift88	ENSDARG00000027234	https://zfin.org/ZDB-GENE-030131-574	intraflagellar transport 88 homolog [Source:ZFIN;Acc:ZDB-GENE-030131-574]
1.33556e-81	0.858221	0.836	0.154	1.85616e-77	1	mal	ENSDARG00000030094	https://zfin.org/ZDB-GENE-050417-175	mal, T-cell differentiation protein [Source:ZFIN;Acc:ZDB-GENE-050417-175]
5.35205e-81	0.276028	0.179	0.003	7.43827e-77	1	ak7b	ENSDARG00000017023	https://zfin.org/ZDB-GENE-050309-170	adenylate kinase 7b [Source:ZFIN;Acc:ZDB-GENE-050309-170]
7.192e-81	0.483698	0.379	0.029	9.99544e-77	1	TPGS1	ENSDARG00000027547	https://zfin.org/ZDB-GENE-040718-280	zgc:92789 [Source:ZFIN;Acc:ZDB-GENE-040718-280]
8.02546e-81	0.252789	0.179	0.003	1.11538e-76	1	cplx2l	ENSDARG00000018997	https://zfin.org/ZDB-GENE-040718-160	complexin 2, like [Source:ZFIN;Acc:ZDB-GENE-040718-160]
3.93727e-80	0.320083	0.186	0.004	5.47202e-76	1	sema7a	ENSDARG00000078707	https://zfin.org/ZDB-GENE-030131-3633	semaphorin 7A [Source:ZFIN;Acc:ZDB-GENE-030131-3633]
6.43715e-80	0.321342	0.229	0.008	8.94635e-76	1	si:ch211-238e22.1	ENSDARG00000099355	https://zfin.org/ZDB-GENE-041210-345	si:ch211-238e22.1 [Source:ZFIN;Acc:ZDB-GENE-041210-345]
7.9922e-80	0.353234	0.221	0.007	1.11076e-75	1	asb5b	ENSDARG00000053222	https://zfin.org/ZDB-GENE-050417-271	ankyrin repeat and SOCS box containing 5b [Source:ZFIN;Acc:ZDB-GENE-050417-271]
1.57888e-79	0.289704	0.2	0.005	2.19433e-75	1	cep70	ENSDARG00000076965	https://zfin.org/ZDB-GENE-070705-311	centrosomal protein 70 [Source:ZFIN;Acc:ZDB-GENE-070705-311]
1.77407e-79	0.277969	0.2	0.005	2.46561e-75	1	CCDC181	ENSDARG00000062021	https://zfin.org/ZDB-GENE-060503-312	si:ch211-232d19.4 [Source:ZFIN;Acc:ZDB-GENE-060503-312]
8.2251e-79	0.674575	0.593	0.079	1.14312e-74	1	uqcc3	ENSDARG00000093382	https://zfin.org/ZDB-GENE-030131-8451	ubiquinol-cytochrome c reductase complex assembly factor 3 [Source:ZFIN;Acc:ZDB-GENE-030131-8451]
1.42006e-78	0.365622	0.243	0.01	1.97359e-74	1	ccdc113	ENSDARG00000006981	https://zfin.org/ZDB-GENE-041010-163	coiled-coil domain containing 113 [Source:ZFIN;Acc:ZDB-GENE-041010-163]
1.67704e-78	-1.50557	0.979	0.995	2.33075e-74	1	epcam	ENSDARG00000040534	https://zfin.org/ZDB-GENE-040426-2209	epithelial cell adhesion molecule [Source:ZFIN;Acc:ZDB-GENE-040426-2209]
2.46954e-78	0.381186	0.221	0.008	3.43216e-74	1	rab36	ENSDARG00000014058	https://zfin.org/ZDB-GENE-040910-5	RAB36, member RAS oncogene family [Source:ZFIN;Acc:ZDB-GENE-040910-5]
7.75402e-78	0.444241	0.214	0.007	1.07765e-73	1	si:ch211-56a11.2	ENSDARG00000093677	https://zfin.org/ZDB-GENE-091204-123	si:ch211-56a11.2 [Source:ZFIN;Acc:ZDB-GENE-091204-123]
1.21817e-77	0.362328	0.193	0.005	1.69302e-73	1	tmeff2b	ENSDARG00000058699	https://zfin.org/ZDB-GENE-101001-4	transmembrane protein with EGF-like and two follistatin-like domains 2b [Source:ZFIN;Acc:ZDB-GENE-101001-4]
1.93794e-77	1.73357	0.993	0.568	2.69334e-73	1	nqo1	ENSDARG00000010250	https://zfin.org/ZDB-GENE-030131-1226	NAD(P)H dehydrogenase, quinone 1 [Source:ZFIN;Acc:ZDB-GENE-030131-1226]
9.66464e-77	0.336358	0.171	0.003	1.34319e-72	1	rem1	ENSDARG00000020544	https://zfin.org/ZDB-GENE-040317-1	RAS (RAD and GEM)-like GTP-binding 1 [Source:ZFIN;Acc:ZDB-GENE-040317-1]
1.26731e-76	0.605228	0.471	0.052	1.76131e-72	1	sms	ENSDARG00000008155	https://zfin.org/ZDB-GENE-040625-150	spermine synthase [Source:ZFIN;Acc:ZDB-GENE-040625-150]
3.35036e-76	0.261929	0.136	0.001	4.65633e-72	1	loxhd1a	ENSDARG00000094738	https://zfin.org/ZDB-GENE-091112-20	lipoxygenase homology domains 1a [Source:ZFIN;Acc:ZDB-GENE-091112-20]
4.25184e-76	0.337561	0.207	0.007	5.90921e-72	1	tmie	ENSDARG00000069423	https://zfin.org/ZDB-GENE-061207-9	transmembrane inner ear [Source:ZFIN;Acc:ZDB-GENE-061207-9]
1.262e-75	0.30408	0.186	0.005	1.75393e-71	1	wdr66	ENSDARG00000059855	https://zfin.org/ZDB-GENE-060526-328	WD repeat domain 66 [Source:ZFIN;Acc:ZDB-GENE-060526-328]
2.66993e-75	0.380413	0.329	0.023	3.71067e-71	1	rheb	ENSDARG00000090213	https://zfin.org/ZDB-GENE-040426-1690	Ras homolog enriched in brain [Source:ZFIN;Acc:ZDB-GENE-040426-1690]
3.26056e-75	1.34108	1	0.85	4.53152e-71	1	calm2b	ENSDARG00000015050	https://zfin.org/ZDB-GENE-030131-5590	calmodulin 2b, (phosphorylase kinase, delta) [Source:ZFIN;Acc:ZDB-GENE-020415-2]
4.10896e-75	0.5397	0.386	0.034	5.71063e-71	1	gdi1	ENSDARG00000056122	https://zfin.org/ZDB-GENE-050522-504	GDP dissociation inhibitor 1 [Source:ZFIN;Acc:ZDB-GENE-050522-504]
2.41073e-74	0.510914	0.414	0.04	3.35044e-70	1	gas8	ENSDARG00000101431	https://zfin.org/ZDB-GENE-030131-1980	growth arrest-specific 8 [Source:ZFIN;Acc:ZDB-GENE-030131-1980]
2.99549e-74	0.32861	0.207	0.007	4.16313e-70	1	plpp1a	ENSDARG00000053381	https://zfin.org/ZDB-GENE-080225-26	phospholipid phosphatase 1a [Source:ZFIN;Acc:ZDB-GENE-080225-26]
5.75279e-74	0.275568	0.186	0.005	7.99522e-70	1	eif3hb	ENSDARG00000036116	https://zfin.org/ZDB-GENE-051030-42	eukaryotic translation initiation factor 3, subunit H, b [Source:ZFIN;Acc:ZDB-GENE-051030-42]
9.9302e-74	0.288243	0.179	0.004	1.3801e-69	1	si:dkeyp-86d6.2	ENSDARG00000101911	https://zfin.org/ZDB-GENE-141216-459	si:dkeyp-86d6.2 [Source:ZFIN;Acc:ZDB-GENE-141216-459]
1.02677e-73	2.20235	1	0.457	1.42701e-69	1	zgc:55461	ENSDARG00000041723	https://zfin.org/ZDB-GENE-040426-2879	zgc:55461 [Source:ZFIN;Acc:ZDB-GENE-040426-2879]
1.3605e-73	0.2644	0.143	0.002	1.89082e-69	1	kcnma1a	ENSDARG00000079840	https://zfin.org/ZDB-GENE-070202-9	potassium large conductance calcium-activated channel, subfamily M, alpha member 1a [Source:ZFIN;Acc:ZDB-GENE-070202-9]
1.60533e-73	0.35327	0.336	0.025	2.23109e-69	1	hebp2	ENSDARG00000042630	https://zfin.org/ZDB-GENE-040426-914	heme binding protein 2 [Source:ZFIN;Acc:ZDB-GENE-040426-914]
6.93631e-73	1.23019	1	0.74	9.64008e-69	1	prdx2	ENSDARG00000025350	https://zfin.org/ZDB-GENE-030326-2	peroxiredoxin 2 [Source:ZFIN;Acc:ZDB-GENE-030326-2]
8.94946e-73	0.460211	0.421	0.042	1.2438e-68	1	arl6ip5b	ENSDARG00000016238	https://zfin.org/ZDB-GENE-040718-223	ADP-ribosylation factor-like 6 interacting protein 5b [Source:ZFIN;Acc:ZDB-GENE-040718-223]
1.33727e-72	0.254535	0.136	0.001	1.85854e-68	1	si:ch211-150j10.4	ENSDARG00000079336	https://zfin.org/ZDB-GENE-110411-215	si:ch211-150j10.4 [Source:ZFIN;Acc:ZDB-GENE-110411-215]
1.48893e-72	0.921674	0.864	0.202	2.06931e-68	1	atp6v1e1b	ENSDARG00000030694	https://zfin.org/ZDB-GENE-020419-11	ATPase, H+ transporting, lysosomal, V1 subunit E1b [Source:ZFIN;Acc:ZDB-GENE-020419-11]
4.50051e-72	0.461063	0.35	0.029	6.25481e-68	1	bbs5	ENSDARG00000039827	https://zfin.org/ZDB-GENE-040426-1083	Bardet-Biedl syndrome 5 [Source:ZFIN;Acc:ZDB-GENE-040426-1083]
4.60971e-72	1.20131	1	0.522	6.40657e-68	1	cox7a2a	ENSDARG00000053217	https://zfin.org/ZDB-GENE-050522-153	cytochrome c oxidase subunit VIIa polypeptide 2a (liver) [Source:ZFIN;Acc:ZDB-GENE-050522-153]
5.59869e-72	0.443802	0.336	0.026	7.78106e-68	1	ift22	ENSDARG00000020822	https://zfin.org/ZDB-GENE-050417-439	intraflagellar transport 22 homolog (Chlamydomonas) [Source:ZFIN;Acc:ZDB-GENE-050417-439]
9.20045e-72	0.594103	0.521	0.066	1.27868e-67	1	necap1	ENSDARG00000020798	https://zfin.org/ZDB-GENE-040426-1682	NECAP endocytosis associated 1 [Source:ZFIN;Acc:ZDB-GENE-040426-1682]
1.01965e-71	0.273128	0.129	0.001	1.41711e-67	1	si:ch211-226m7.4	ENSDARG00000032885	https://zfin.org/ZDB-GENE-080919-1	si:ch211-226m7.4 [Source:ZFIN;Acc:ZDB-GENE-080919-1]
1.12247e-71	0.266713	0.179	0.005	1.56001e-67	1	dll4	ENSDARG00000070425	https://zfin.org/ZDB-GENE-041014-73	delta-like 4 (Drosophila) [Source:ZFIN;Acc:ZDB-GENE-041014-73]
1.22566e-71	0.385773	0.257	0.014	1.70342e-67	1	si:ch211-112b1.4	ENSDARG00000096053	https://zfin.org/ZDB-GENE-131127-114	si:ch211-112b1.4 [Source:ZFIN;Acc:ZDB-GENE-131127-114]
2.05288e-71	1.03635	0.964	0.271	2.8531e-67	1	prr15la	ENSDARG00000025615	https://zfin.org/ZDB-GENE-040801-218	proline rich 15-like a [Source:ZFIN;Acc:ZDB-GENE-040801-218]
3.00063e-71	-1.81609	1	1	4.17028e-67	1	si:dkey-205h13.2	ENSDARG00000089429	https://zfin.org/ZDB-GENE-080225-18	si:dkey-205h13.2 [Source:ZFIN;Acc:ZDB-GENE-080225-18]
3.01354e-71	0.583409	0.471	0.055	4.18822e-67	1	triobpa	ENSDARG00000075870	https://zfin.org/ZDB-GENE-110411-40	TRIO and F-actin binding protein a [Source:ZFIN;Acc:ZDB-GENE-110411-40]
1.18645e-70	0.331634	0.236	0.011	1.64893e-66	1	tex9	ENSDARG00000010586	https://zfin.org/ZDB-GENE-110623-3	testis expressed 9 [Source:ZFIN;Acc:ZDB-GENE-110623-3]
5.57785e-70	0.357828	0.271	0.016	7.7521e-66	1	si:ch73-110p20.1	ENSDARG00000095236	https://zfin.org/ZDB-GENE-081030-16	si:ch73-110p20.1 [Source:ZFIN;Acc:ZDB-GENE-081030-16]
7.78335e-70	-1.59242	0.829	0.974	1.08173e-65	1	cldnb	ENSDARG00000009544	https://zfin.org/ZDB-GENE-010328-2	claudin b [Source:ZFIN;Acc:ZDB-GENE-010328-2]
1.13265e-69	0.268944	0.179	0.005	1.57415e-65	1	WDR63	ENSDARG00000105093	https://zfin.org/	WD repeat domain 63 [Source:HGNC Symbol;Acc:HGNC:30711]
4.09278e-69	0.371779	0.264	0.016	5.68814e-65	1	wdr54	ENSDARG00000010248	https://zfin.org/ZDB-GENE-040801-151	WD repeat domain 54 [Source:ZFIN;Acc:ZDB-GENE-040801-151]
6.41008e-69	0.27424	0.221	0.01	8.90873e-65	1	dynlt1	ENSDARG00000045909	https://zfin.org/ZDB-GENE-041210-9	dynein, light chain, Tctex-type 1 [Source:ZFIN;Acc:ZDB-GENE-041210-9]
7.79017e-69	0.453192	0.286	0.019	1.08268e-64	1	hbegfa	ENSDARG00000075121	https://zfin.org/ZDB-GENE-080204-119	heparin-binding EGF-like growth factor a [Source:ZFIN;Acc:ZDB-GENE-080204-119]
1.2147e-68	0.743379	0.629	0.104	1.68819e-64	1	lyar	ENSDARG00000098507	https://zfin.org/ZDB-GENE-040426-1414	Ly1 antibody reactive homolog (mouse) [Source:ZFIN;Acc:ZDB-GENE-040426-1414]
1.38275e-68	-1.17525	1	1	1.92174e-64	1	malat1	ENSDARG00000099970	https://zfin.org/ZDB-GENE-141216-248	metastasis associated lung adenocarcinoma transcript 1 [Source:ZFIN;Acc:ZDB-GENE-141216-248]
2.62086e-68	0.87531	0.764	0.161	3.64247e-64	1	trappc3	ENSDARG00000045364	https://zfin.org/ZDB-GENE-040801-120	trafficking protein particle complex 3 [Source:ZFIN;Acc:ZDB-GENE-040801-120]
3.21989e-68	0.3494	0.243	0.013	4.475e-64	1	pih1d3	ENSDARG00000038612	https://zfin.org/ZDB-GENE-040722-2	PIH1 domain containing 3 [Source:ZFIN;Acc:ZDB-GENE-040722-2]
8.04465e-67	1.2318	0.957	0.35	1.11805e-62	1	txn	ENSDARG00000044125	https://zfin.org/ZDB-GENE-040718-162	thioredoxin [Source:ZFIN;Acc:ZDB-GENE-040718-162]
1.59054e-66	0.328296	0.221	0.011	2.21053e-62	1	rsph4a	ENSDARG00000067606	https://zfin.org/ZDB-GENE-030131-7437	radial spoke head 4 homolog A (Chlamydomonas) [Source:ZFIN;Acc:ZDB-GENE-030131-7437]
3.70391e-66	0.599774	0.507	0.068	5.1477e-62	1	adipor2	ENSDARG00000101849	https://zfin.org/ZDB-GENE-041210-60	adiponectin receptor 2 [Source:ZFIN;Acc:ZDB-GENE-041210-60]
3.94323e-66	0.803579	0.664	0.12	5.4803e-62	1	hacd3	ENSDARG00000016038	https://zfin.org/ZDB-GENE-040426-1200	3-hydroxyacyl-CoA dehydratase 3 [Source:ZFIN;Acc:ZDB-GENE-040426-1200]
7.92261e-66	1.25235	0.986	0.628	1.10108e-61	1	calm3b	ENSDARG00000074057	https://zfin.org/ZDB-GENE-030131-5590	calmodulin 3b (phosphorylase kinase, delta) [Source:ZFIN;Acc:ZDB-GENE-030131-527]
8.20055e-65	0.300395	0.229	0.012	1.13971e-60	1	klhdc7a	ENSDARG00000105322	https://zfin.org/ZDB-GENE-160114-44	kelch domain containing 7A [Source:ZFIN;Acc:ZDB-GENE-160114-44]
1.51128e-64	0.436624	0.364	0.036	2.10037e-60	1	tmem107	ENSDARG00000059150	https://zfin.org/ZDB-GENE-040426-2294	transmembrane protein 107 [Source:ZFIN;Acc:ZDB-GENE-040426-2294]
1.8626e-64	0.864544	0.864	0.208	2.58864e-60	1	atp6v0e1	ENSDARG00000101794	https://zfin.org/ZDB-GENE-041010-133	ATPase, H+ transporting, lysosomal V0 subunit e1 [Source:ZFIN;Acc:ZDB-GENE-041010-133]
2.85957e-64	0.569	0.45	0.056	3.97423e-60	1	tctex1d2	ENSDARG00000054255	https://zfin.org/ZDB-GENE-081104-219	Tctex1 domain containing 2 [Source:ZFIN;Acc:ZDB-GENE-081104-219]
3.17878e-64	0.859289	0.836	0.201	4.41787e-60	1	atoh1a	ENSDARG00000055294	https://zfin.org/ZDB-GENE-990415-17	atonal bHLH transcription factor 1a [Source:ZFIN;Acc:ZDB-GENE-990415-17]
5.43742e-64	1.13572	0.993	0.427	7.55692e-60	1	calm1b	ENSDARG00000034187	https://zfin.org/ZDB-GENE-030131-5590	calmodulin 1b [Source:ZFIN;Acc:ZDB-GENE-030804-2]
7.51932e-64	0.252944	0.157	0.004	1.04503e-59	1	nt5c2l1	ENSDARG00000034852	https://zfin.org/ZDB-GENE-031006-8	5'-nucleotidase, cytosolic II, like 1 [Source:ZFIN;Acc:ZDB-GENE-031006-8]
7.73252e-64	0.32729	0.236	0.013	1.07467e-59	1	ccdc40	ENSDARG00000100584	https://zfin.org/ZDB-GENE-060503-723	coiled-coil domain containing 40 [Source:ZFIN;Acc:ZDB-GENE-060503-723]
2.28273e-63	-1.47556	1	1	3.17254e-59	1	si:rp71-1c10.11	ENSDARG00000096721	https://zfin.org/ZDB-GENE-130603-61	si:rp71-1c10.11 [Source:ZFIN;Acc:ZDB-GENE-130603-61]
4.1331e-63	0.30799	0.214	0.011	5.74418e-59	1	erich3	ENSDARG00000069262	https://zfin.org/ZDB-GENE-070209-295	glutamate-rich 3 [Source:ZFIN;Acc:ZDB-GENE-070209-295]
4.7622e-63	0.443902	0.329	0.029	6.61851e-59	1	slc30a10	ENSDARG00000103983	https://zfin.org/ZDB-GENE-060608-2	solute carrier family 30, member 10 [Source:ZFIN;Acc:ZDB-GENE-060608-2]
1.02556e-61	-1.40712	0.836	0.966	1.42533e-57	1	marcksl1b	ENSDARG00000035715	https://zfin.org/ZDB-GENE-040426-2315	MARCKS-like 1b [Source:ZFIN;Acc:ZDB-GENE-040426-2315]
1.67059e-61	0.344656	0.264	0.018	2.32179e-57	1	dlg1	ENSDARG00000009677	https://zfin.org/ZDB-GENE-010724-8	discs, large homolog 1 (Drosophila) [Source:ZFIN;Acc:ZDB-GENE-010724-8]
1.79826e-60	0.255424	0.121	0.002	2.49922e-56	1	slitrk2	ENSDARG00000006636	https://zfin.org/ZDB-GENE-080327-7	SLIT and NTRK-like family, member 2 [Source:ZFIN;Acc:ZDB-GENE-080327-7]
2.6769e-60	0.428559	0.364	0.038	3.72036e-56	1	zgc:77880	ENSDARG00000030563	https://zfin.org/ZDB-GENE-040426-1901	zgc:77880 [Source:ZFIN;Acc:ZDB-GENE-040426-1901]
5.18711e-60	0.337834	0.243	0.016	7.20904e-56	1	casz1	ENSDARG00000037030	https://zfin.org/ZDB-GENE-060130-108	castor zinc finger 1 [Source:ZFIN;Acc:ZDB-GENE-060130-108]
2.13461e-59	0.626629	0.629	0.115	2.96668e-55	1	cbr1l	ENSDARG00000021149	https://zfin.org/ZDB-GENE-030131-9642	carbonyl reductase 1-like [Source:ZFIN;Acc:ZDB-GENE-030131-9642]
2.19359e-59	0.254454	0.193	0.009	3.04865e-55	1	cep19.1	ENSDARG00000059175	https://zfin.org/ZDB-GENE-050913-81	centrosomal protein 19 [Source:ZFIN;Acc:ZDB-GENE-050913-81]
4.78277e-59	0.377326	0.2	0.01	6.6471e-55	1	si:ch73-308b14.1	ENSDARG00000095351	https://zfin.org/ZDB-GENE-091204-411	si:ch73-308b14.1 [Source:ZFIN;Acc:ZDB-GENE-091204-411]
1.04527e-58	0.329103	0.214	0.012	1.45272e-54	1	si:dkey-265j8.3	ENSDARG00000097108	https://zfin.org/ZDB-GENE-131127-55	si:dkey-265j8.3 [Source:ZFIN;Acc:ZDB-GENE-131127-55]
1.97931e-58	-0.784858	1	1	2.75085e-54	1	eef1a1l1	ENSDARG00000020850	https://zfin.org/ZDB-GENE-990415-52	eukaryotic translation elongation factor 1 alpha 1, like 1 [Source:ZFIN;Acc:ZDB-GENE-990415-52]
2.06202e-58	0.445117	0.429	0.054	2.86579e-54	1	atp6v0a1a	ENSDARG00000020847	https://zfin.org/ZDB-GENE-030131-3027	ATPase, H+ transporting, lysosomal V0 subunit a1a [Source:ZFIN;Acc:ZDB-GENE-030131-3027]
2.8368e-58	-1.86959	0.814	0.936	3.94259e-54	1	tmem176l.4	ENSDARG00000074390	https://zfin.org/ZDB-GENE-030131-3532	transmembrane protein 176l.4 [Source:ZFIN;Acc:ZDB-GENE-030131-3532]
4.01686e-58	0.557736	0.414	0.053	5.58264e-54	1	apooa	ENSDARG00000104696	https://zfin.org/ZDB-GENE-031118-91	apolipoprotein O, a [Source:ZFIN;Acc:ZDB-GENE-031118-91]
4.09622e-58	0.259757	0.15	0.004	5.69292e-54	1	DNAH10	ENSDARG00000061486	https://zfin.org/ZDB-GENE-060531-163	si:dkeyp-86b9.1 [Source:ZFIN;Acc:ZDB-GENE-060531-163]
4.24639e-58	1.15246	0.786	0.214	5.90164e-54	1	calm2a	ENSDARG00000031427	https://zfin.org/ZDB-GENE-030131-5590	calmodulin 2a (phosphorylase kinase, delta) [Source:ZFIN;Acc:ZDB-GENE-030804-3]
6.70855e-58	0.397921	0.357	0.038	9.32354e-54	1	ttc26	ENSDARG00000012039	https://zfin.org/ZDB-GENE-041212-41	tetratricopeptide repeat domain 26 [Source:ZFIN;Acc:ZDB-GENE-041212-41]
8.21803e-58	0.781769	0.8	0.191	1.14214e-53	1	cfap20	ENSDARG00000100514	https://zfin.org/ZDB-GENE-040426-1784	cilia and flagella associated protein 20 [Source:ZFIN;Acc:ZDB-GENE-040426-1784]
8.85781e-57	0.275006	0.164	0.006	1.23106e-52	1	GRXCR1	ENSDARG00000105434	https://zfin.org/ZDB-GENE-160113-42	si:dkey-109l4.6 [Source:ZFIN;Acc:ZDB-GENE-160113-42]
2.36644e-56	1.07725	0.843	0.265	3.28887e-52	1	ap1s1	ENSDARG00000056803	https://zfin.org/ZDB-GENE-040426-1119	adaptor-related protein complex 1, sigma 1 subunit [Source:ZFIN;Acc:ZDB-GENE-040426-1119]
2.45641e-56	0.51299	0.479	0.071	3.41392e-52	1	gclm	ENSDARG00000018953	https://zfin.org/ZDB-GENE-030131-5906	glutamate-cysteine ligase, modifier subunit [Source:ZFIN;Acc:ZDB-GENE-030131-5906]
4.15884e-56	0.701446	0.707	0.15	5.77995e-52	1	echdc2	ENSDARG00000016607	https://zfin.org/ZDB-GENE-030219-147	enoyl CoA hydratase domain containing 2 [Source:ZFIN;Acc:ZDB-GENE-030219-147]
4.71517e-56	0.347165	0.171	0.007	6.55314e-52	1	myo1ca	ENSDARG00000020924	https://zfin.org/ZDB-GENE-070705-190	myosin Ic, paralog a [Source:ZFIN;Acc:ZDB-GENE-070705-190]
5.16641e-56	1.0859	0.964	0.389	7.18028e-52	1	nkx3.2	ENSDARG00000037639	https://zfin.org/ZDB-GENE-030127-1	NK3 homeobox 2 [Source:ZFIN;Acc:ZDB-GENE-030127-1]
1.76573e-55	0.303541	0.207	0.012	2.45401e-51	1	zmynd10	ENSDARG00000002406	https://zfin.org/ZDB-GENE-040426-1218	zinc finger, MYND-type containing 10 [Source:ZFIN;Acc:ZDB-GENE-040426-1218]
1.97183e-55	0.309922	0.214	0.013	2.74045e-51	1	hepacam2	ENSDARG00000061365	https://zfin.org/ZDB-GENE-060503-135	HEPACAM family member 2 [Source:ZFIN;Acc:ZDB-GENE-060503-135]
2.98235e-54	0.250809	0.143	0.004	4.14487e-50	1	armc4	ENSDARG00000055128	https://zfin.org/ZDB-GENE-100316-7	armadillo repeat containing 4 [Source:ZFIN;Acc:ZDB-GENE-100316-7]
4.75468e-54	0.432706	0.371	0.045	6.60806e-50	1	arl2bp	ENSDARG00000025383	https://zfin.org/ZDB-GENE-040426-1604	ADP-ribosylation factor-like 2 binding protein [Source:ZFIN;Acc:ZDB-GENE-040426-1604]
1.13193e-53	0.422824	0.343	0.038	1.57315e-49	1	msrb3	ENSDARG00000045658	https://zfin.org/ZDB-GENE-040625-74	methionine sulfoxide reductase B3 [Source:ZFIN;Acc:ZDB-GENE-040625-74]
1.54789e-53	-1.81644	0.507	0.89	2.15126e-49	1	si:ch211-103f14.3	ENSDARG00000088315	https://zfin.org/ZDB-GENE-110411-160	si:ch211-103f14.3 [Source:ZFIN;Acc:ZDB-GENE-110411-160]
1.95973e-53	0.358172	0.114	0.002	2.72364e-49	1	zgc:195356	ENSDARG00000099134	https://zfin.org/ZDB-GENE-030131-6619	zgc:195356 [Source:ZFIN;Acc:ZDB-GENE-030131-6619]
2.06703e-53	0.742848	0.836	0.216	2.87276e-49	1	btf3l4	ENSDARG00000089681	https://zfin.org/ZDB-GENE-040426-1650	basic transcription factor 3-like 4 [Source:ZFIN;Acc:ZDB-GENE-040426-1650]
3.0544e-53	0.938511	1	0.964	4.24501e-49	1	zgc:92066	ENSDARG00000031776	https://zfin.org/ZDB-GENE-040718-72	zgc:92066 [Source:ZFIN;Acc:ZDB-GENE-040718-72]
8.22706e-53	0.426287	0.414	0.056	1.1434e-48	1	ndel1a	ENSDARG00000010953	https://zfin.org/ZDB-GENE-040115-2	nudE neurodevelopment protein 1-like 1a [Source:ZFIN;Acc:ZDB-GENE-040115-2]
1.55745e-52	0.447268	0.357	0.043	2.16455e-48	1	tmem53	ENSDARG00000038789	https://zfin.org/ZDB-GENE-040718-384	transmembrane protein 53 [Source:ZFIN;Acc:ZDB-GENE-040718-384]
2.47218e-52	0.64435	0.479	0.078	3.43583e-48	1	ckbb	ENSDARG00000043257	https://zfin.org/ZDB-GENE-020103-2	creatine kinase, brain b [Source:ZFIN;Acc:ZDB-GENE-020103-2]
4.66653e-52	0.929878	0.986	0.454	6.48554e-48	1	uqcrq	ENSDARG00000029064	https://zfin.org/ZDB-GENE-040718-199	ubiquinol-cytochrome c reductase, complex III subunit VII [Source:ZFIN;Acc:ZDB-GENE-040718-199]
1.27096e-51	0.327782	0.2	0.012	1.76638e-47	1	si:ch211-274p24.2	ENSDARG00000095185	https://zfin.org/ZDB-GENE-050309-265	si:ch211-274p24.2 [Source:ZFIN;Acc:ZDB-GENE-050309-265]
1.48313e-51	0.340224	0.221	0.016	2.06125e-47	1	nrxn3b	ENSDARG00000062693	https://zfin.org/ZDB-GENE-070206-10	neurexin 3b [Source:ZFIN;Acc:ZDB-GENE-070206-10]
5.98943e-51	0.543657	0.464	0.074	8.3241e-47	1	ethe1	ENSDARG00000005713	https://zfin.org/ZDB-GENE-040426-2503	ethylmalonic encephalopathy 1 [Source:ZFIN;Acc:ZDB-GENE-040426-2503]
7.43184e-51	-1.45423	0.571	0.885	1.03288e-46	1	cd9b	ENSDARG00000016691	https://zfin.org/ZDB-GENE-040426-2768	CD9 molecule b [Source:ZFIN;Acc:ZDB-GENE-040426-2768]
2.11717e-50	0.250796	0.121	0.003	2.94244e-46	1	zmat4b	ENSDARG00000061419	https://zfin.org/ZDB-GENE-091118-68	zinc finger, matrin-type 4b [Source:ZFIN;Acc:ZDB-GENE-091118-68]
5.33398e-50	0.94782	0.971	0.53	7.41317e-46	1	atp5g1	ENSDARG00000056008	https://zfin.org/ZDB-GENE-040426-1966	ATP synthase, H+ transporting, mitochondrial Fo complex, subunit C1 (subunit 9) [Source:ZFIN;Acc:ZDB-GENE-040426-1966]
9.76619e-50	0.354748	0.221	0.016	1.35731e-45	1	dnah5	ENSDARG00000087373	https://zfin.org/ZDB-GENE-110411-177	dynein, axonemal, heavy chain 5 [Source:ZFIN;Acc:ZDB-GENE-110411-177]
1.00281e-49	0.459632	0.321	0.037	1.39371e-45	1	atp6v1aa	ENSDARG00000034534	https://zfin.org/ZDB-GENE-040426-1143	ATPase, H+ transporting, lysosomal, V1 subunit Aa [Source:ZFIN;Acc:ZDB-GENE-040426-1143]
1.33453e-49	0.770454	0.886	0.274	1.85473e-45	1	vdac1	ENSDARG00000045132	https://zfin.org/ZDB-GENE-030131-6514	voltage-dependent anion channel 1 [Source:ZFIN;Acc:ZDB-GENE-030131-6514]
2.58574e-49	-1.49549	0.807	0.925	3.59366e-45	1	zgc:158343	ENSDARG00000099411	https://zfin.org/ZDB-GENE-061201-9	zgc:158343 [Source:ZFIN;Acc:ZDB-GENE-061201-9]
2.67713e-49	0.411662	0.343	0.042	3.72068e-45	1	cib2	ENSDARG00000102820	https://zfin.org/ZDB-GENE-040426-1663	calcium and integrin binding family member 2 [Source:ZFIN;Acc:ZDB-GENE-040426-1663]
3.8374e-49	0.669347	0.771	0.196	5.33322e-45	1	arl6ip1	ENSDARG00000054578	https://zfin.org/ZDB-GENE-040426-1087	ADP-ribosylation factor-like 6 interacting protein 1 [Source:ZFIN;Acc:ZDB-GENE-040426-1087]
5.94351e-49	0.335374	0.293	0.03	8.26029e-45	1	stc2a	ENSDARG00000056680	https://zfin.org/ZDB-GENE-041008-14	stanniocalcin 2a [Source:ZFIN;Acc:ZDB-GENE-041008-14]
1.51969e-48	-1.37448	0.736	0.888	2.11206e-44	1	gpx1a	ENSDARG00000018146	https://zfin.org/ZDB-GENE-030410-1	glutathione peroxidase 1a [Source:ZFIN;Acc:ZDB-GENE-030410-1]
1.79572e-48	0.651519	0.729	0.179	2.49569e-44	1	prelid1a	ENSDARG00000098671	https://zfin.org/ZDB-GENE-040426-1341	PRELI domain containing 1a [Source:ZFIN;Acc:ZDB-GENE-040426-1341]
2.12751e-48	0.252574	0.164	0.008	2.95681e-44	1	dzank1	ENSDARG00000055787	https://zfin.org/ZDB-GENE-051113-296	double zinc ribbon and ankyrin repeat domains 1 [Source:ZFIN;Acc:ZDB-GENE-051113-296]
2.88681e-48	0.430427	0.257	0.024	4.01209e-44	1	ankrd24	ENSDARG00000062103	https://zfin.org/ZDB-GENE-050208-747	ankyrin repeat domain 24 [Source:ZFIN;Acc:ZDB-GENE-050208-747]
4.04194e-48	0.673118	0.771	0.197	5.61749e-44	1	atp6v1g1	ENSDARG00000022315	https://zfin.org/ZDB-GENE-030131-6965	ATPase, H+ transporting, lysosomal, V1 subunit G1 [Source:ZFIN;Acc:ZDB-GENE-030131-6965]
1.38802e-47	0.339569	0.164	0.009	1.92907e-43	1	si:ch73-209e20.6	ENSDARG00000103528	https://zfin.org/ZDB-GENE-120215-114	si:ch73-209e20.6 [Source:ZFIN;Acc:ZDB-GENE-120215-114]
1.87122e-47	0.731686	0.836	0.243	2.60062e-43	1	minos1	ENSDARG00000101619	https://zfin.org/ZDB-GENE-060825-325	mitochondrial inner membrane organizing system 1 [Source:ZFIN;Acc:ZDB-GENE-060825-325]
2.85631e-47	0.724241	0.771	0.212	3.96969e-43	1	atp6ap2	ENSDARG00000008735	https://zfin.org/ZDB-GENE-040426-1960	ATPase, H+ transporting, lysosomal accessory protein 2 [Source:ZFIN;Acc:ZDB-GENE-040426-1960]
4.83578e-47	0.421411	0.336	0.042	6.72077e-43	1	flj11011l	ENSDARG00000045360	https://zfin.org/ZDB-GENE-050113-1	hypothetical protein FLJ11011-like (H. sapiens) [Source:ZFIN;Acc:ZDB-GENE-050113-1]
1.24596e-46	0.690974	0.857	0.242	1.73164e-42	1	cetn4	ENSDARG00000041215	https://zfin.org/ZDB-GENE-030826-21	centrin 4 [Source:ZFIN;Acc:ZDB-GENE-030826-21]
1.32614e-46	0.464403	0.493	0.087	1.84308e-42	1	si:dkey-202l16.5	ENSDARG00000013252	https://zfin.org/ZDB-GENE-120411-6	si:dkey-202l16.5 [Source:ZFIN;Acc:ZDB-GENE-120411-6]
1.834e-46	0.304168	0.293	0.032	2.54889e-42	1	med30	ENSDARG00000101115	https://zfin.org/ZDB-GENE-040426-1676	mediator complex subunit 30 [Source:ZFIN;Acc:ZDB-GENE-040426-1676]
5.92166e-46	0.851963	0.986	0.508	8.22993e-42	1	ndufb4	ENSDARG00000019332	https://zfin.org/ZDB-GENE-071015-3	NADH dehydrogenase (ubiquinone) 1 beta subcomplex, 4 [Source:ZFIN;Acc:ZDB-GENE-040426-1973]
1.01939e-45	0.265484	0.207	0.016	1.41675e-41	1	mns1	ENSDARG00000060169	https://zfin.org/ZDB-GENE-030521-42	meiosis-specific nuclear structural 1 [Source:ZFIN;Acc:ZDB-GENE-030521-42]
1.06299e-45	-1.78497	0.936	0.942	1.47734e-41	1	zgc:77517	ENSDARG00000028618	https://zfin.org/ZDB-GENE-040426-1508	zgc:77517 [Source:ZFIN;Acc:ZDB-GENE-040426-1508]
1.78119e-45	0.425032	0.471	0.082	2.4755e-41	1	ip6k2a	ENSDARG00000008310	https://zfin.org/ZDB-GENE-030131-760	inositol hexakisphosphate kinase 2a [Source:ZFIN;Acc:ZDB-GENE-030131-760]
2.00025e-45	-1.72259	0.4	0.82	2.77995e-41	1	krt1-c5	ENSDARG00000026979	https://zfin.org/ZDB-GENE-060316-3	keratin, type 1, gene c5 [Source:ZFIN;Acc:ZDB-GENE-060316-3]
2.05996e-45	0.271164	0.271	0.028	2.86293e-41	1	ift52	ENSDARG00000045025	https://zfin.org/ZDB-GENE-040614-3	intraflagellar transport 52 homolog (Chlamydomonas) [Source:ZFIN;Acc:ZDB-GENE-040614-3]
2.44985e-45	0.670697	1	0.881	3.40481e-41	1	cox7c	ENSDARG00000104537	https://zfin.org/ZDB-GENE-030131-8062	cytochrome c oxidase, subunit VIIc [Source:ZFIN;Acc:ZDB-GENE-030131-8062]
2.90478e-45	-0.723517	0.993	0.984	4.03707e-41	1	nme2b.1	ENSDARG00000103791	https://zfin.org/ZDB-GENE-000210-32	NME/NM23 nucleoside diphosphate kinase 2b, tandem duplicate 1 [Source:ZFIN;Acc:ZDB-GENE-000210-32]
5.25381e-45	0.323789	0.221	0.019	7.30175e-41	1	myo6b	ENSDARG00000042141	https://zfin.org/ZDB-GENE-030318-3	myosin VIb [Source:ZFIN;Acc:ZDB-GENE-030318-3]
5.53763e-45	0.314301	0.25	0.024	7.6962e-41	1	cisd1	ENSDARG00000079516	https://zfin.org/ZDB-GENE-040426-1162	CDGSH iron sulfur domain 1 [Source:ZFIN;Acc:ZDB-GENE-040426-1162]
8.45519e-45	0.3484	0.229	0.02	1.1751e-40	1	fbxo32	ENSDARG00000040277	https://zfin.org/ZDB-GENE-040426-1040	F-box protein 32 [Source:ZFIN;Acc:ZDB-GENE-040426-1040]
1.70267e-44	0.516505	0.471	0.085	2.36637e-40	1	pllp	ENSDARG00000062756	https://zfin.org/ZDB-GENE-050419-195	plasmolipin [Source:ZFIN;Acc:ZDB-GENE-050419-195]
2.07279e-44	0.480053	0.6	0.128	2.88076e-40	1	ift46	ENSDARG00000011240	https://zfin.org/ZDB-GENE-080102-3	intraflagellar transport 46 homolog (Chlamydomonas) [Source:ZFIN;Acc:ZDB-GENE-080102-3]
3.37519e-44	0.272906	0.207	0.016	4.69084e-40	1	stoml3a	ENSDARG00000079914	https://zfin.org/ZDB-GENE-070620-18	stomatin (EPB72)-like 3a [Source:ZFIN;Acc:ZDB-GENE-070620-18]
3.62608e-44	0.312729	0.236	0.022	5.03952e-40	1	TST	ENSDARG00000093235	https://zfin.org/ZDB-GENE-030131-9020	zgc:162544 [Source:ZFIN;Acc:ZDB-GENE-030131-9020]
4.39736e-44	0.42877	0.257	0.026	6.11145e-40	1	zgc:154006	ENSDARG00000061797	https://zfin.org/ZDB-GENE-061013-134	zgc:154006 [Source:ZFIN;Acc:ZDB-GENE-061013-134]
5.06425e-44	0.816272	0.95	0.36	7.03829e-40	1	USMG5	ENSDARG00000096003	https://zfin.org/ZDB-GENE-110914-234	si:dkeyp-80c12.10 [Source:ZFIN;Acc:ZDB-GENE-110914-234]
8.77071e-44	0.361562	0.314	0.04	1.21895e-39	1	ift57	ENSDARG00000021022	https://zfin.org/ZDB-GENE-040614-1	intraflagellar transport 57 homolog (Chlamydomonas) [Source:ZFIN;Acc:ZDB-GENE-040614-1]
9.77866e-44	-1.5065	0.707	0.864	1.35904e-39	1	sdc4	ENSDARG00000059906	https://zfin.org/ZDB-GENE-061111-1	syndecan 4 [Source:ZFIN;Acc:ZDB-GENE-061111-1]
1.08406e-43	0.566777	0.686	0.165	1.50663e-39	1	meis1a	ENSDARG00000002937	https://zfin.org/ZDB-GENE-020122-3	Meis homeobox 1 a [Source:ZFIN;Acc:ZDB-GENE-020122-3]
1.31544e-43	-1.663	0.586	0.849	1.82819e-39	1	phlda2	ENSDARG00000042874	https://zfin.org/ZDB-GENE-050522-73	pleckstrin homology-like domain, family A, member 2 [Source:ZFIN;Acc:ZDB-GENE-050522-73]
1.88119e-43	0.553951	0.521	0.106	2.61448e-39	1	chchd10	ENSDARG00000010717	https://zfin.org/ZDB-GENE-040426-1753	coiled-coil-helix-coiled-coil-helix domain containing 10 [Source:ZFIN;Acc:ZDB-GENE-040426-1753]
2.48407e-43	0.386104	0.35	0.049	3.45236e-39	1	acyp1	ENSDARG00000060126	https://zfin.org/ZDB-GENE-050309-125	acylphosphatase 1, erythrocyte (common) type [Source:ZFIN;Acc:ZDB-GENE-050309-125]
3.17104e-43	-0.690988	1	0.999	4.40711e-39	1	rplp1	ENSDARG00000021864	https://zfin.org/ZDB-GENE-030131-8663	ribosomal protein, large, P1 [Source:ZFIN;Acc:ZDB-GENE-030131-8663]
5.26214e-43	0.251851	0.164	0.01	7.31332e-39	1	man2a2	ENSDARG00000063101	https://zfin.org/ZDB-GENE-110331-1	mannosidase, alpha, class 2A, member 2 [Source:ZFIN;Acc:ZDB-GENE-110331-1]
1.30397e-42	-0.589076	0.993	0.996	1.81226e-38	1	rplp2	ENSDARG00000101406	https://zfin.org/ZDB-GENE-031018-2	ribosomal protein, large P2 [Source:ZFIN;Acc:ZDB-GENE-031018-2]
2.30073e-42	0.751841	1	0.956	3.19756e-38	1	si:ch211-153b23.5	ENSDARG00000058206	https://zfin.org/ZDB-GENE-030131-9744	si:ch211-153b23.5 [Source:ZFIN;Acc:ZDB-GENE-030131-9744]
4.19639e-42	0.261534	0.221	0.02	5.83214e-38	1	rab3aa	ENSDARG00000056347	https://zfin.org/ZDB-GENE-040801-2	RAB3A, member RAS oncogene family, a [Source:ZFIN;Acc:ZDB-GENE-040801-2]
5.87461e-42	0.301957	0.336	0.046	8.16453e-38	1	arl6	ENSDARG00000032056	https://zfin.org/ZDB-GENE-041219-2	ADP-ribosylation factor-like 6 [Source:ZFIN;Acc:ZDB-GENE-041219-2]
8.52117e-42	0.545689	0.579	0.129	1.18427e-37	1	lysmd2	ENSDARG00000091771	https://zfin.org/ZDB-GENE-040801-250	LysM, putative peptidoglycan-binding, domain containing 2 [Source:ZFIN;Acc:ZDB-GENE-040801-250]
1.50309e-41	-1.29781	0.929	0.928	2.089e-37	1	tmsb4x	ENSDARG00000077777	https://zfin.org/ZDB-GENE-030131-8304	thymosin, beta 4 x [Source:ZFIN;Acc:ZDB-GENE-030131-8304]
2.88146e-41	0.367002	0.264	0.03	4.00465e-37	1	si:ch73-57f22.5	ENSDARG00000098046	https://zfin.org/ZDB-GENE-131120-165	si:ch73-57f22.5 [Source:ZFIN;Acc:ZDB-GENE-131120-165]
3.93169e-41	0.6191	0.486	0.098	5.46427e-37	1	cox6b1	ENSDARG00000045230	https://zfin.org/ZDB-GENE-040718-448	cytochrome c oxidase subunit VIb polypeptide 1 [Source:ZFIN;Acc:ZDB-GENE-040718-448]
5.27025e-41	0.31384	0.264	0.03	7.32459e-37	1	synrg	ENSDARG00000073926	https://zfin.org/ZDB-GENE-030131-9396	synergin, gamma [Source:ZFIN;Acc:ZDB-GENE-030131-9396]
9.31225e-41	0.353052	0.357	0.054	1.29422e-36	1	atp6v1c1a	ENSDARG00000023967	https://zfin.org/ZDB-GENE-030616-612	ATPase, H+ transporting, lysosomal, V1 subunit C1a [Source:ZFIN;Acc:ZDB-GENE-030616-612]
1.12504e-40	0.269119	0.271	0.032	1.56358e-36	1	ak4	ENSDARG00000006546	https://zfin.org/ZDB-GENE-040426-2505	adenylate kinase 4 [Source:ZFIN;Acc:ZDB-GENE-040426-2505]
1.56728e-40	0.742534	0.986	0.629	2.17821e-36	1	cox6a1	ENSDARG00000022438	https://zfin.org/ZDB-GENE-030131-7715	cytochrome c oxidase subunit VIa polypeptide 1 [Source:ZFIN;Acc:ZDB-GENE-030131-7715]
4.04618e-40	0.659751	0.807	0.252	5.62338e-36	1	tfg	ENSDARG00000003641	https://zfin.org/ZDB-GENE-030131-8410	trk-fused gene [Source:ZFIN;Acc:ZDB-GENE-030131-8410]
7.85502e-40	0.892792	0.95	0.489	1.09169e-35	1	capgb	ENSDARG00000099672	https://zfin.org/ZDB-GENE-030131-8541	capping protein (actin filament), gelsolin-like b [Source:ZFIN;Acc:ZDB-GENE-030131-8541]
9.02976e-40	-1.04891	0.871	0.903	1.25496e-35	1	eef1da	ENSDARG00000102291	https://zfin.org/ZDB-GENE-040426-2740	eukaryotic translation elongation factor 1 delta a (guanine nucleotide exchange protein) [Source:ZFIN;Acc:ZDB-GENE-040426-2740]
1.32979e-39	0.392074	0.293	0.039	1.84814e-35	1	scg3	ENSDARG00000086288	https://zfin.org/ZDB-GENE-040426-1725	secretogranin III [Source:ZFIN;Acc:ZDB-GENE-040426-1725]
1.59503e-39	0.456993	0.55	0.119	2.21677e-35	1	hagh	ENSDARG00000025338	https://zfin.org/ZDB-GENE-030131-8921	hydroxyacylglutathione hydrolase [Source:ZFIN;Acc:ZDB-GENE-030131-8921]
1.61098e-39	-1.36519	0.586	0.818	2.23894e-35	1	xbp1	ENSDARG00000035622	https://zfin.org/ZDB-GENE-011210-2	X-box binding protein 1 [Source:ZFIN;Acc:ZDB-GENE-011210-2]
1.77605e-39	-1.347	0.871	0.885	2.46835e-35	1	si:ch211-195b11.3	ENSDARG00000100582	https://zfin.org/ZDB-GENE-141222-6	si:ch211-195b11.3 [Source:ZFIN;Acc:ZDB-GENE-141222-6]
7.74607e-39	0.756225	0.921	0.356	1.07655e-34	1	cox17	ENSDARG00000069920	https://zfin.org/ZDB-GENE-040912-91	COX17 cytochrome c oxidase copper chaperone [Source:ZFIN;Acc:ZDB-GENE-040912-91]
1.94239e-38	0.716536	0.807	0.267	2.69953e-34	1	prdx5	ENSDARG00000055064	https://zfin.org/ZDB-GENE-050522-159	peroxiredoxin 5 [Source:ZFIN;Acc:ZDB-GENE-050522-159]
2.38451e-38	-1.53818	0.75	0.869	3.314e-34	1	id1.1	ENSDARG00000096939	https://zfin.org/
3.44953e-38	0.250371	0.25	0.029	4.79416e-34	1	zgc:103586	ENSDARG00000036426	https://zfin.org/ZDB-GENE-041114-88	zgc:103586 [Source:ZFIN;Acc:ZDB-GENE-041114-88]
4.12905e-38	0.274187	0.257	0.031	5.73855e-34	1	map9	ENSDARG00000037276	https://zfin.org/ZDB-GENE-080225-36	microtubule-associated protein 9 [Source:ZFIN;Acc:ZDB-GENE-080225-36]
4.31384e-38	0.443555	0.5	0.106	5.99538e-34	1	ift20	ENSDARG00000040556	https://zfin.org/ZDB-GENE-040614-2	intraflagellar transport 20 homolog (Chlamydomonas) [Source:ZFIN;Acc:ZDB-GENE-040614-2]
5.3283e-38	0.646996	0.757	0.232	7.40527e-34	1	anp32e	ENSDARG00000054804	https://zfin.org/ZDB-GENE-040426-2448	acidic (leucine-rich) nuclear phosphoprotein 32 family, member E [Source:ZFIN;Acc:ZDB-GENE-040426-2448]
7.17003e-38	0.387614	0.507	0.106	9.9649e-34	1	sqstm1	ENSDARG00000075014	https://zfin.org/ZDB-GENE-040426-2204	sequestosome 1 [Source:ZFIN;Acc:ZDB-GENE-040426-2204]
1.07923e-37	0.391416	0.414	0.076	1.49991e-33	1	cdc34a	ENSDARG00000069708	https://zfin.org/ZDB-GENE-040426-713	cell division cycle 34 homolog (S. cerevisiae) a [Source:ZFIN;Acc:ZDB-GENE-040426-713]
1.92992e-37	-1.26188	0.593	0.814	2.6822e-33	1	btg1	ENSDARG00000027249	https://zfin.org/ZDB-GENE-010726-1	B-cell translocation gene 1, anti-proliferative [Source:ZFIN;Acc:ZDB-GENE-010726-1]
2.3119e-37	0.488737	0.443	0.089	3.21308e-33	1	rfc5	ENSDARG00000035634	https://zfin.org/ZDB-GENE-040907-1	replication factor C (activator 1) 5 [Source:ZFIN;Acc:ZDB-GENE-040907-1]
2.91593e-37	1.0137	0.957	0.54	4.05256e-33	1	zgc:153867	ENSDARG00000033738	https://zfin.org/ZDB-GENE-030131-9170	zgc:153867 [Source:ZFIN;Acc:ZDB-GENE-030131-9170]
4.35914e-37	0.256374	0.143	0.009	6.05834e-33	1	cap2	ENSDARG00000104478	https://zfin.org/ZDB-GENE-040426-1758	CAP, adenylate cyclase-associated protein, 2 (yeast) [Source:ZFIN;Acc:ZDB-GENE-040426-1758]
6.91909e-37	0.259625	0.307	0.044	9.61615e-33	1	CABZ01079721.1	ENSDARG00000101951	https://zfin.org/
1.6534e-36	1.51828	0.529	0.141	2.29789e-32	1	si:dkey-11c5.11	ENSDARG00000096637	https://zfin.org/ZDB-GENE-121214-253	si:dkey-11c5.11 [Source:ZFIN;Acc:ZDB-GENE-121214-253]
2.21153e-36	0.298414	0.2	0.019	3.07359e-32	1	uggt2	ENSDARG00000062089	https://zfin.org/ZDB-GENE-050517-21	UDP-glucose glycoprotein glucosyltransferase 2 [Source:ZFIN;Acc:ZDB-GENE-050517-21]
2.83987e-36	0.401321	0.429	0.084	3.94686e-32	1	atp6v1ba	ENSDARG00000013443	https://zfin.org/ZDB-GENE-030711-3	ATPase, H+ transporting, lysosomal, V1 subunit B, member a [Source:ZFIN;Acc:ZDB-GENE-030711-3]
2.84273e-36	0.453743	0.407	0.078	3.95082e-32	1	dpcd	ENSDARG00000060501	https://zfin.org/ZDB-GENE-060825-166	deleted in primary ciliary dyskinesia homolog (mouse) [Source:ZFIN;Acc:ZDB-GENE-060825-166]
4.52452e-36	0.367566	0.443	0.088	6.28818e-32	1	gb:bc139872	ENSDARG00000086753	https://zfin.org/ZDB-GENE-111013-4	expressed sequence BC139872 [Source:ZFIN;Acc:ZDB-GENE-111013-4]
4.69548e-36	0.354613	0.371	0.065	6.52578e-32	1	plekhb2	ENSDARG00000013928	https://zfin.org/ZDB-GENE-040426-754	pleckstrin homology domain containing, family B (evectins) member 2 [Source:ZFIN;Acc:ZDB-GENE-040426-754]
5.13331e-36	-1.41421	0.514	0.795	7.13428e-32	1	pdia3	ENSDARG00000102640	https://zfin.org/ZDB-GENE-031002-9	protein disulfide isomerase family A, member 3 [Source:ZFIN;Acc:ZDB-GENE-031002-9]
5.57351e-36	0.719661	0.964	0.539	7.74607e-32	1	atp5o	ENSDARG00000001788	https://zfin.org/ZDB-GENE-050522-147	ATP synthase, H+ transporting, mitochondrial F1 complex, O subunit [Source:ZFIN;Acc:ZDB-GENE-050522-147]
7.26074e-36	0.30617	0.314	0.048	1.0091e-31	1	mipol1	ENSDARG00000104845	https://zfin.org/ZDB-GENE-030131-41	mirror-image polydactyly 1 [Source:ZFIN;Acc:ZDB-GENE-030131-41]
8.25182e-36	0.556911	0.493	0.112	1.14684e-31	1	pgd	ENSDARG00000015343	https://zfin.org/ZDB-GENE-040426-2807	phosphogluconate dehydrogenase [Source:ZFIN;Acc:ZDB-GENE-040426-2807]
8.67298e-36	0.716003	0.964	0.553	1.20537e-31	1	cox5aa	ENSDARG00000088383	https://zfin.org/ZDB-GENE-050522-133	cytochrome c oxidase subunit Vaa [Source:ZFIN;Acc:ZDB-GENE-050522-133]
9.54048e-36	0.417107	0.464	0.097	1.32594e-31	1	hddc2	ENSDARG00000034957	https://zfin.org/ZDB-GENE-050522-394	HD domain containing 2 [Source:ZFIN;Acc:ZDB-GENE-050522-394]
1.39913e-35	0.643505	0.857	0.305	1.94452e-31	1	capn8	ENSDARG00000055715	https://zfin.org/ZDB-GENE-050522-279	calpain 8 [Source:ZFIN;Acc:ZDB-GENE-050522-279]
1.96924e-35	0.460741	0.514	0.117	2.73685e-31	1	bcl2l10	ENSDARG00000026766	https://zfin.org/ZDB-GENE-030825-2	BCL2-like 10 (apoptosis facilitator) [Source:ZFIN;Acc:ZDB-GENE-030825-2]
2.1253e-35	0.35148	0.293	0.043	2.95375e-31	1	id4	ENSDARG00000045131	https://zfin.org/ZDB-GENE-051113-208	inhibitor of DNA binding 4 [Source:ZFIN;Acc:ZDB-GENE-051113-208]
3.61869e-35	0.683403	0.871	0.344	5.02925e-31	1	ndufa7	ENSDARG00000036684	https://zfin.org/ZDB-GENE-040801-169	NADH dehydrogenase (ubiquinone) 1 alpha subcomplex, 7 [Source:ZFIN;Acc:ZDB-GENE-040801-169]
4.54759e-35	0.381644	0.479	0.103	6.32024e-31	1	pgk1	ENSDARG00000054191	https://zfin.org/ZDB-GENE-040426-2711	phosphoglycerate kinase 1 [Source:ZFIN;Acc:ZDB-GENE-040426-2711]
5.75988e-35	0.763918	0.886	0.369	8.00508e-31	1	cycsb	ENSDARG00000044562	https://zfin.org/ZDB-GENE-040625-38	cytochrome c, somatic b [Source:ZFIN;Acc:ZDB-GENE-040625-38]
6.87383e-35	0.258763	0.286	0.041	9.55324e-31	1	pir	ENSDARG00000056638	https://zfin.org/ZDB-GENE-040718-288	pirin [Source:ZFIN;Acc:ZDB-GENE-040718-288]
8.51205e-35	0.664019	0.879	0.331	1.18301e-30	1	ndufa12	ENSDARG00000042469	https://zfin.org/ZDB-GENE-050828-1	NADH dehydrogenase (ubiquinone) 1 alpha subcomplex, 12 [Source:ZFIN;Acc:ZDB-GENE-050828-1]
2.0847e-34	-0.875164	0.893	0.906	2.89732e-30	1	ppiaa	ENSDARG00000009212	https://zfin.org/ZDB-GENE-030131-8556	peptidylprolyl isomerase Aa (cyclophilin A) [Source:ZFIN;Acc:ZDB-GENE-030131-8556]
2.62248e-34	0.30668	0.264	0.036	3.64472e-30	1	six1a	ENSDARG00000039304	https://zfin.org/ZDB-GENE-040718-155	SIX homeobox 1a [Source:ZFIN;Acc:ZDB-GENE-040718-155]
2.96257e-34	0.330808	0.393	0.074	4.11738e-30	1	spag7	ENSDARG00000011555	https://zfin.org/ZDB-GENE-040426-1632	sperm associated antigen 7 [Source:ZFIN;Acc:ZDB-GENE-040426-1632]
4.98415e-34	0.567366	0.186	0.018	6.92697e-30	1	zgc:171699	ENSDARG00000095966	https://zfin.org/ZDB-GENE-071004-24	zgc:171699 [Source:ZFIN;Acc:ZDB-GENE-071004-24]
7.21414e-34	-0.613337	0.993	0.981	1.00262e-29	1	rpl24	ENSDARG00000099104	https://zfin.org/ZDB-GENE-020419-25	ribosomal protein L24 [Source:ZFIN;Acc:ZDB-GENE-020419-25]
8.32652e-34	0.324857	0.236	0.03	1.15722e-29	1	hk1	ENSDARG00000039452	https://zfin.org/ZDB-GENE-040426-2848	hexokinase 1 [Source:ZFIN;Acc:ZDB-GENE-040426-2848]
8.97011e-34	0.714685	0.929	0.425	1.24667e-29	1	NDUFC1	ENSDARG00000103101	https://zfin.org/ZDB-GENE-141216-417	si:ch211-235e9.6 [Source:ZFIN;Acc:ZDB-GENE-141216-417]
1.14427e-33	0.469031	0.579	0.147	1.59031e-29	1	sod2	ENSDARG00000042644	https://zfin.org/ZDB-GENE-030131-7742	superoxide dismutase 2, mitochondrial [Source:ZFIN;Acc:ZDB-GENE-030131-7742]
1.90421e-33	0.30603	0.264	0.037	2.64647e-29	1	rsg1	ENSDARG00000028442	https://zfin.org/ZDB-GENE-040912-80	REM2 and RAB-like small GTPase 1 [Source:ZFIN;Acc:ZDB-GENE-040912-80]
2.01912e-33	0.649805	0.921	0.399	2.80618e-29	1	mdh2	ENSDARG00000043371	https://zfin.org/ZDB-GENE-040426-2143	malate dehydrogenase 2, NAD (mitochondrial) [Source:ZFIN;Acc:ZDB-GENE-040426-2143]
2.28487e-33	0.454765	0.657	0.18	3.17552e-29	1	tctex1d1	ENSDARG00000103545	https://zfin.org/ZDB-GENE-040912-49	Tctex1 domain containing 1 [Source:ZFIN;Acc:ZDB-GENE-040912-49]
6.36797e-33	0.541087	0.771	0.248	8.8502e-29	1	arf2a	ENSDARG00000014763	https://zfin.org/ZDB-GENE-040122-4	ADP-ribosylation factor 2a [Source:ZFIN;Acc:ZDB-GENE-040122-4]
1.13152e-32	0.322501	0.293	0.046	1.57259e-28	1	ubtd2	ENSDARG00000069184	https://zfin.org/ZDB-GENE-040718-473	ubiquitin domain containing 2 [Source:ZFIN;Acc:ZDB-GENE-040718-473]
1.29471e-32	0.404726	0.571	0.144	1.79939e-28	1	si:dkey-78l4.14	ENSDARG00000071378	https://zfin.org/ZDB-GENE-050309-178	si:dkey-78l4.14 [Source:ZFIN;Acc:ZDB-GENE-050309-178]
1.48227e-32	0.319619	0.386	0.074	2.06006e-28	1	isca2	ENSDARG00000038154	https://zfin.org/ZDB-GENE-131121-486	iron-sulfur cluster assembly 2 [Source:ZFIN;Acc:ZDB-GENE-131121-486]
1.67388e-32	0.296929	0.2	0.022	2.32636e-28	1	emx2	ENSDARG00000039701	https://zfin.org/ZDB-GENE-990415-54	empty spiracles homeobox 2 [Source:ZFIN;Acc:ZDB-GENE-990415-54]
1.73439e-32	0.331591	0.264	0.038	2.41046e-28	1	hadhaa	ENSDARG00000057128	https://zfin.org/ZDB-GENE-031222-5	hydroxyacyl-CoA dehydrogenase/3-ketoacyl-CoA thiolase/enoyl-CoA hydratase (trifunctional protein), alpha subunit a [Source:ZFIN;Acc:ZDB-GENE-031222-5]
2.44667e-32	-0.575434	1	0.999	3.40038e-28	1	rps28	ENSDARG00000035860	https://zfin.org/ZDB-GENE-030131-2022	ribosomal protein S28 [Source:ZFIN;Acc:ZDB-GENE-030131-2022]
2.86048e-32	0.501991	0.529	0.135	3.9755e-28	1	mrpl20	ENSDARG00000090462	https://zfin.org/ZDB-GENE-030131-5299	mitochondrial ribosomal protein L20 [Source:ZFIN;Acc:ZDB-GENE-030131-5299]
3.6469e-32	0.529299	0.743	0.229	5.06846e-28	1	dbi	ENSDARG00000026369	https://zfin.org/ZDB-GENE-040426-1861	diazepam binding inhibitor (GABA receptor modulator, acyl-CoA binding protein) [Source:ZFIN;Acc:ZDB-GENE-040426-1861]
5.28566e-32	-0.753592	0.964	0.95	7.34601e-28	1	sec61g	ENSDARG00000018637	https://zfin.org/ZDB-GENE-040718-203	Sec61 translocon gamma subunit [Source:ZFIN;Acc:ZDB-GENE-040718-203]
1.20062e-31	0.33128	0.457	0.101	1.66862e-27	1	atp6v0d1	ENSDARG00000069090	https://zfin.org/ZDB-GENE-030131-1531	ATPase, H+ transporting, lysosomal V0 subunit d1 [Source:ZFIN;Acc:ZDB-GENE-030131-1531]
1.23248e-31	0.549057	0.807	0.281	1.71291e-27	1	ndufb5	ENSDARG00000070824	https://zfin.org/ZDB-GENE-011010-1	NADH dehydrogenase (ubiquinone) 1 beta subcomplex 5 [Source:ZFIN;Acc:ZDB-GENE-011010-1]
1.47829e-31	0.424417	0.493	0.119	2.05453e-27	1	cops5	ENSDARG00000057624	https://zfin.org/ZDB-GENE-040426-1686	COP9 signalosome subunit 5 [Source:ZFIN;Acc:ZDB-GENE-040426-1686]
1.95828e-31	-1.4028	0.75	0.826	2.72162e-27	1	sox21a	ENSDARG00000031664	https://zfin.org/ZDB-GENE-990715-6	SRY (sex determining region Y)-box 21a [Source:ZFIN;Acc:ZDB-GENE-990715-6]
2.10849e-31	-0.640295	0.993	0.985	2.93038e-27	1	rpl29	ENSDARG00000077717	https://zfin.org/ZDB-GENE-040801-167	ribosomal protein L29 [Source:ZFIN;Acc:ZDB-GENE-040801-167]
2.56264e-31	0.596426	0.879	0.343	3.56156e-27	1	ndufb6	ENSDARG00000037259	https://zfin.org/ZDB-GENE-040426-1781	NADH dehydrogenase (ubiquinone) 1 beta subcomplex, 6 [Source:ZFIN;Acc:ZDB-GENE-040426-1781]
2.93575e-31	0.608773	0.979	0.594	4.0801e-27	1	cox6c	ENSDARG00000038577	https://zfin.org/ZDB-GENE-040724-95	cytochrome c oxidase subunit VIc [Source:ZFIN;Acc:ZDB-GENE-040724-95]
3.40135e-31	0.310709	0.193	0.021	4.7272e-27	1	phtf2	ENSDARG00000102123	https://zfin.org/ZDB-GENE-040711-4	putative homeodomain transcription factor 2 [Source:ZFIN;Acc:ZDB-GENE-040711-4]
4.06764e-31	0.342383	0.371	0.073	5.65321e-27	1	tusc3	ENSDARG00000078854	https://zfin.org/ZDB-GENE-050522-381	tumor suppressor candidate 3 [Source:ZFIN;Acc:ZDB-GENE-050522-381]
5.14547e-31	0.261807	0.286	0.045	7.15118e-27	1	nfu1	ENSDARG00000068125	https://zfin.org/ZDB-GENE-050417-365	NFU1 iron-sulfur cluster scaffold homolog (S. cerevisiae) [Source:ZFIN;Acc:ZDB-GENE-050417-365]
7.80544e-31	0.398611	0.114	0.007	1.0848e-26	1	cox4i1l	ENSDARG00000012388	https://zfin.org/ZDB-GENE-130814-2	cytochrome c oxidase subunit IV isoform 1, like [Source:ZFIN;Acc:ZDB-GENE-130814-2]
8.66215e-31	0.602468	0.814	0.299	1.20387e-26	1	dynll2b	ENSDARG00000005172	https://zfin.org/ZDB-GENE-050320-132	dynein, light chain, LC8-type 2b [Source:ZFIN;Acc:ZDB-GENE-050320-132]
1.04101e-30	0.282223	0.321	0.057	1.44679e-26	1	irx2a	ENSDARG00000001785	https://zfin.org/ZDB-GENE-040426-1446	iroquois homeobox 2a [Source:ZFIN;Acc:ZDB-GENE-040426-1446]
1.10167e-30	0.32806	0.407	0.085	1.53111e-26	1	fgfr1op	ENSDARG00000003058	https://zfin.org/ZDB-GENE-090417-1	FGFR1 oncogene partner [Source:ZFIN;Acc:ZDB-GENE-090417-1]
1.28823e-30	-1.034	0.743	0.836	1.79038e-26	1	cldnh	ENSDARG00000069503	https://zfin.org/ZDB-GENE-010328-8	claudin h [Source:ZFIN;Acc:ZDB-GENE-010328-8]
1.78126e-30	0.438275	0.529	0.135	2.4756e-26	1	eml2	ENSDARG00000008808	https://zfin.org/ZDB-GENE-050706-71	echinoderm microtubule associated protein like 2 [Source:ZFIN;Acc:ZDB-GENE-050706-71]
1.96915e-30	-1.65973	0.171	0.63	2.73672e-26	1	CR847847.1	ENSDARG00000087096	https://zfin.org/
3.20328e-30	0.380272	0.557	0.145	4.45192e-26	1	ruvbl1	ENSDARG00000002591	https://zfin.org/ZDB-GENE-030109-2	RuvB-like AAA ATPase 1 [Source:ZFIN;Acc:ZDB-GENE-030109-2]
3.55493e-30	0.692386	0.893	0.378	4.94064e-26	1	nfe2l2a	ENSDARG00000042824	https://zfin.org/ZDB-GENE-030723-2	nuclear factor, erythroid 2-like 2a [Source:ZFIN;Acc:ZDB-GENE-030723-2]
4.82085e-30	0.308525	0.407	0.087	6.70002e-26	1	vdac3	ENSDARG00000003695	https://zfin.org/ZDB-GENE-040426-2380	voltage-dependent anion channel 3 [Source:ZFIN;Acc:ZDB-GENE-040426-2380]
5.24282e-30	0.674811	0.964	0.483	7.28647e-26	1	atp5c1	ENSDARG00000045514	https://zfin.org/ZDB-GENE-030131-8901	ATP synthase, H+ transporting, mitochondrial F1 complex, gamma polypeptide 1 [Source:ZFIN;Acc:ZDB-GENE-030131-8901]
7.30377e-30	0.253422	0.307	0.053	1.01508e-25	1	bag1	ENSDARG00000020895	https://zfin.org/ZDB-GENE-050309-89	BCL2-associated athanogene 1 [Source:ZFIN;Acc:ZDB-GENE-050309-89]
1.03837e-29	0.508268	0.85	0.308	1.44313e-25	1	ndufs6	ENSDARG00000056583	https://zfin.org/ZDB-GENE-040912-86	NADH dehydrogenase (ubiquinone) Fe-S protein 6 [Source:ZFIN;Acc:ZDB-GENE-040912-86]
1.2649e-29	0.633064	0.957	0.513	1.75796e-25	1	atp5ib	ENSDARG00000068940	https://zfin.org/ZDB-GENE-051130-1	ATP synthase, H+ transporting, mitochondrial Fo complex, subunit Eb [Source:ZFIN;Acc:ZDB-GENE-051130-1]
1.37602e-29	0.473793	0.693	0.217	1.91239e-25	1	cox7a3	ENSDARG00000054907	https://zfin.org/ZDB-GENE-030131-7691	cytochrome c oxidase subunit VIIa polypeptide 3 [Source:ZFIN;Acc:ZDB-GENE-030131-7691]
1.40711e-29	0.390492	0.464	0.112	1.9556e-25	1	vapb	ENSDARG00000070435	https://zfin.org/ZDB-GENE-030131-2348	VAMP (vesicle-associated membrane protein)-associated protein B and C [Source:ZFIN;Acc:ZDB-GENE-030131-2348]
1.50183e-29	0.326273	0.364	0.074	2.08725e-25	1	si:dkey-188i13.11	ENSDARG00000092895	https://zfin.org/ZDB-GENE-090313-209	si:dkey-188i13.11 [Source:ZFIN;Acc:ZDB-GENE-090313-209]
1.77585e-29	0.297465	0.357	0.07	2.46807e-25	1	cltcb	ENSDARG00000090716	https://zfin.org/ZDB-GENE-050227-12	clathrin, heavy chain b (Hc) [Source:ZFIN;Acc:ZDB-GENE-050227-12]
2.12669e-29	0.605531	0.971	0.517	2.95568e-25	1	UQCR10	ENSDARG00000104517	https://zfin.org/	ubiquinol-cytochrome c reductase, complex III subunit X [Source:HGNC Symbol;Acc:HGNC:30863]
2.42392e-29	0.261411	0.264	0.042	3.36877e-25	1	tomm40l	ENSDARG00000036721	https://zfin.org/ZDB-GENE-040426-2319	translocase of outer mitochondrial membrane 40 homolog, like [Source:ZFIN;Acc:ZDB-GENE-040426-2319]
3.01109e-29	-1.38472	0.843	0.889	4.18481e-25	1	wu:fj16a03	ENSDARG00000100952	https://zfin.org/	wu:fj16a03 [Source:EntrezGene;Acc:335475]
3.22217e-29	0.253715	0.186	0.021	4.47817e-25	1	cyb5d1	ENSDARG00000056007	https://zfin.org/ZDB-GENE-050417-173	cytochrome b5 domain containing 1 [Source:ZFIN;Acc:ZDB-GENE-050417-173]
3.85051e-29	0.348015	0.486	0.119	5.35144e-25	1	rabif	ENSDARG00000002690	https://zfin.org/ZDB-GENE-040718-216	RAB interacting factor [Source:ZFIN;Acc:ZDB-GENE-040718-216]
4.52527e-29	-0.535485	1	0.991	6.28922e-25	1	rpl34	ENSDARG00000029500	https://zfin.org/ZDB-GENE-040426-1033	ribosomal protein L34 [Source:ZFIN;Acc:ZDB-GENE-040426-1033]
4.82925e-29	-0.650542	0.964	0.949	6.71169e-25	1	rpl12	ENSDARG00000006691	https://zfin.org/ZDB-GENE-030131-5297	ribosomal protein L12 [Source:ZFIN;Acc:ZDB-GENE-030131-5297]
4.99884e-29	0.668137	0.95	0.513	6.94739e-25	1	oaz1b	ENSDARG00000104782	https://zfin.org/ZDB-GENE-020731-5	ornithine decarboxylase antizyme 1b [Source:ZFIN;Acc:ZDB-GENE-020731-5]
1.09787e-28	-0.526953	0.993	0.994	1.52581e-24	1	rpl26	ENSDARG00000102317	https://zfin.org/ZDB-GENE-040426-2117	ribosomal protein L26 [Source:ZFIN;Acc:ZDB-GENE-040426-2117]
1.16449e-28	-0.481373	1	1	1.61841e-24	1	RPL41	ENSDARG00000092807	https://zfin.org/ZDB-GENE-030131-7528	si:dkey-151g10.6 [Source:ZFIN;Acc:ZDB-GENE-030131-7528]
1.25733e-28	0.592928	0.971	0.678	1.74744e-24	1	atp5b	ENSDARG00000070083	https://zfin.org/ZDB-GENE-030131-124	ATP synthase, H+ transporting, mitochondrial F1 complex, beta polypeptide [Source:ZFIN;Acc:ZDB-GENE-030131-124]
1.33352e-28	0.306645	0.336	0.065	1.85333e-24	1	atp6v1h	ENSDARG00000006370	https://zfin.org/ZDB-GENE-021219-2	ATPase, H+ transporting, lysosomal V1 subunit H [Source:ZFIN;Acc:ZDB-GENE-021219-2]
1.52111e-28	0.455883	1	0.879	2.11404e-24	1	ndufa4l	ENSDARG00000099499	https://zfin.org/ZDB-GENE-040426-2756	NADH dehydrogenase (ubiquinone) 1 alpha subcomplex 4, like [Source:ZFIN;Acc:ZDB-GENE-040426-2756]
2.71865e-28	0.383108	0.557	0.153	3.77839e-24	1	trappc4	ENSDARG00000027418	https://zfin.org/ZDB-GENE-040426-1734	trafficking protein particle complex 4 [Source:ZFIN;Acc:ZDB-GENE-040426-1734]
4.4503e-28	-0.596293	1	0.969	6.18502e-24	1	rps21	ENSDARG00000025850	https://zfin.org/ZDB-GENE-040426-1102	ribosomal protein S21 [Source:ZFIN;Acc:ZDB-GENE-040426-1102]
5.73526e-28	-1.36037	0.357	0.681	7.97086e-24	1	klf17	ENSDARG00000038792	https://zfin.org/ZDB-GENE-010129-1	Kruppel-like factor 17 [Source:ZFIN;Acc:ZDB-GENE-010129-1]
5.75158e-28	0.457665	0.636	0.196	7.99355e-24	1	ndufa10	ENSDARG00000013333	https://zfin.org/ZDB-GENE-030131-670	NADH dehydrogenase (ubiquinone) 1 alpha subcomplex, 10 [Source:ZFIN;Acc:ZDB-GENE-030131-670]
1.21029e-27	-0.847548	0.829	0.862	1.68206e-23	1	ppib	ENSDARG00000092798	https://zfin.org/ZDB-GENE-040426-1955	peptidylprolyl isomerase B (cyclophilin B) [Source:ZFIN;Acc:ZDB-GENE-040426-1955]
1.26658e-27	0.349451	0.429	0.102	1.76029e-23	1	nme3	ENSDARG00000100990	https://zfin.org/ZDB-GENE-000210-34	NME/NM23 nucleoside diphosphate kinase 3 [Source:ZFIN;Acc:ZDB-GENE-000210-34]
1.51195e-27	0.266009	0.264	0.044	2.10131e-23	1	ift74	ENSDARG00000023495	https://zfin.org/ZDB-GENE-040718-81	intraflagellar transport 74 [Source:ZFIN;Acc:ZDB-GENE-040718-81]
1.83937e-27	-0.512869	1	0.997	2.55636e-23	1	rps20	ENSDARG00000036044	https://zfin.org/ZDB-GENE-040426-2284	ribosomal protein S20 [Source:ZFIN;Acc:ZDB-GENE-040426-2284]
2.56965e-27	0.363982	0.45	0.111	3.57129e-23	1	gpatch11	ENSDARG00000026892	https://zfin.org/ZDB-GENE-040718-89	G patch domain containing 11 [Source:ZFIN;Acc:ZDB-GENE-040718-89]
3.33936e-27	0.532928	0.886	0.373	4.64104e-23	1	ndufb3	ENSDARG00000075709	https://zfin.org/	NADH dehydrogenase (ubiquinone) 1 beta subcomplex, 3 [Source:EntrezGene;Acc:100332034]
3.47663e-27	-1.10391	0.721	0.795	4.83183e-23	1	dap1b.1	ENSDARG00000086842	https://zfin.org/ZDB-GENE-000511-4	death associated protein 1b [Source:ZFIN;Acc:ZDB-GENE-000511-4]
3.65977e-27	-0.505921	1	0.994	5.08635e-23	1	rps15a	ENSDARG00000010160	https://zfin.org/ZDB-GENE-030131-8708	ribosomal protein S15a [Source:ZFIN;Acc:ZDB-GENE-030131-8708]
5.56444e-27	0.373012	0.55	0.154	7.73346e-23	1	trappc2l	ENSDARG00000100109	https://zfin.org/ZDB-GENE-040801-249	trafficking protein particle complex 2-like [Source:ZFIN;Acc:ZDB-GENE-040801-249]
5.96396e-27	-0.52386	1	0.994	8.28872e-23	1	rpl11	ENSDARG00000043509	https://zfin.org/ZDB-GENE-040625-147	ribosomal protein L11 [Source:ZFIN;Acc:ZDB-GENE-040625-147]
7.12212e-27	0.465126	0.679	0.224	9.89833e-23	1	reep3b	ENSDARG00000004160	https://zfin.org/ZDB-GENE-040426-730	receptor accessory protein 3b [Source:ZFIN;Acc:ZDB-GENE-040426-730]
7.70469e-27	-0.899831	0.779	0.831	1.0708e-22	1	selm	ENSDARG00000051957	https://zfin.org/ZDB-GENE-030410-4	selenoprotein M [Source:ZFIN;Acc:ZDB-GENE-030410-4]
8.92192e-27	0.539714	0.993	0.783	1.23997e-22	1	atp5e	ENSDARG00000095897	https://zfin.org/ZDB-GENE-110411-22	ATP synthase, H+ transporting, mitochondrial F1 complex, epsilon subunit [Source:ZFIN;Acc:ZDB-GENE-110411-22]
9.82031e-27	0.574557	0.879	0.392	1.36483e-22	1	uqcrfs1	ENSDARG00000007745	https://zfin.org/ZDB-GENE-040426-2060	ubiquinol-cytochrome c reductase, Rieske iron-sulfur polypeptide 1 [Source:ZFIN;Acc:ZDB-GENE-040426-2060]
9.88772e-27	0.509023	0.764	0.276	1.3742e-22	1	gabarapl2	ENSDARG00000027200	https://zfin.org/ZDB-GENE-040718-336	GABA(A) receptor-associated protein like 2 [Source:ZFIN;Acc:ZDB-GENE-040718-336]
1.02761e-26	-1.56586	0.464	0.716	1.42817e-22	1	spaca4l	ENSDARG00000100431	https://zfin.org/ZDB-GENE-101011-2	sperm acrosome associated 4 like [Source:ZFIN;Acc:ZDB-GENE-101011-2]
1.26602e-26	-0.560101	0.986	0.974	1.75952e-22	1	rpl35	ENSDARG00000018334	https://zfin.org/ZDB-GENE-020419-2	ribosomal protein L35 [Source:ZFIN;Acc:ZDB-GENE-020419-2]
1.40457e-26	-1.20551	0.543	0.721	1.95208e-22	1	cfl1l	ENSDARG00000012972	https://zfin.org/ZDB-GENE-040426-2770	cofilin 1 (non-muscle), like [Source:ZFIN;Acc:ZDB-GENE-040426-2770]
1.8275e-26	-0.474907	1	0.998	2.53986e-22	1	rpl36	ENSDARG00000100588	https://zfin.org/ZDB-GENE-040622-2	ribosomal protein L36 [Source:ZFIN;Acc:ZDB-GENE-040622-2]
2.1694e-26	-1.73574	0.564	0.759	3.01504e-22	1	cbln20	ENSDARG00000087476	https://zfin.org/ZDB-GENE-111109-2	cerebellin 20 [Source:ZFIN;Acc:ZDB-GENE-111109-2]
2.3982e-26	-0.828996	0.821	0.858	3.33302e-22	1	pnrc2	ENSDARG00000053291	https://zfin.org/ZDB-GENE-030131-5475	proline-rich nuclear receptor coactivator 2 [Source:ZFIN;Acc:ZDB-GENE-030131-5475]
2.46921e-26	-0.837422	0.886	0.894	3.43171e-22	1	ptmaa	ENSDARG00000021113	https://zfin.org/ZDB-GENE-030131-7647	prothymosin, alpha a [Source:ZFIN;Acc:ZDB-GENE-030131-7647]
2.93814e-26	0.493289	0.836	0.315	4.08342e-22	1	sdhb	ENSDARG00000075768	https://zfin.org/ZDB-GENE-030131-8005	succinate dehydrogenase complex, subunit B, iron sulfur (Ip) [Source:ZFIN;Acc:ZDB-GENE-030131-8005]
3.19038e-26	-0.496641	1	0.997	4.43399e-22	1	rpl37.1	ENSDARG00000076360	https://zfin.org/ZDB-GENE-040625-39	ribosomal protein L37 [Source:ZFIN;Acc:ZDB-GENE-040625-39]
3.23041e-26	0.322036	0.314	0.063	4.48962e-22	1	spag1a	ENSDARG00000004017	https://zfin.org/ZDB-GENE-030131-9443	sperm associated antigen 1a [Source:ZFIN;Acc:ZDB-GENE-030131-9443]
3.33852e-26	-1.21587	0.536	0.726	4.63988e-22	1	soul2	ENSDARG00000039499	https://zfin.org/ZDB-GENE-030131-2524	heme-binding protein soul2 [Source:ZFIN;Acc:ZDB-GENE-030131-2524]
3.38872e-26	0.452303	0.771	0.272	4.70965e-22	1	ndufa8	ENSDARG00000058041	https://zfin.org/ZDB-GENE-040426-1688	NADH dehydrogenase (ubiquinone) 1 alpha subcomplex, 8 [Source:ZFIN;Acc:ZDB-GENE-040426-1688]
3.9288e-26	0.294016	0.471	0.12	5.46025e-22	1	gpx4a	ENSDARG00000068478	https://zfin.org/ZDB-GENE-030410-2	glutathione peroxidase 4a [Source:ZFIN;Acc:ZDB-GENE-030410-2]
4.41758e-26	0.276192	0.336	0.07	6.13955e-22	1	cetn3	ENSDARG00000011825	https://zfin.org/ZDB-GENE-050522-152	centrin 3 [Source:ZFIN;Acc:ZDB-GENE-050522-152]
6.76774e-26	0.418718	0.629	0.197	9.4058e-22	1	ptges3a	ENSDARG00000037284	https://zfin.org/ZDB-GENE-040426-2200	prostaglandin E synthase 3a (cytosolic) [Source:ZFIN;Acc:ZDB-GENE-040426-2200]
7.96865e-26	0.418184	0.65	0.208	1.10748e-21	1	ndufv2	ENSDARG00000013044	https://zfin.org/ZDB-GENE-040426-1713	NADH dehydrogenase (ubiquinone) flavoprotein 2 [Source:ZFIN;Acc:ZDB-GENE-040426-1713]
2.40335e-25	0.49535	1	0.77	3.34017e-21	1	cox7b	ENSDARG00000098250	https://zfin.org/ZDB-GENE-030131-6602	cytochrome c oxidase subunit VIIb [Source:ZFIN;Acc:ZDB-GENE-030131-6602]
2.62818e-25	0.26672	0.443	0.111	3.65264e-21	1	wrb	ENSDARG00000074271	https://zfin.org/ZDB-GENE-030131-7696	tryptophan rich basic protein [Source:ZFIN;Acc:ZDB-GENE-030131-7696]
2.84484e-25	-0.748387	0.943	0.914	3.95376e-21	1	si:dkey-222f2.1	ENSDARG00000043242	https://zfin.org/ZDB-GENE-050208-726	si:dkey-222f2.1 [Source:ZFIN;Acc:ZDB-GENE-050208-726]
2.90561e-25	-0.422022	1	0.999	4.03821e-21	1	RPL37A	ENSDARG00000098458	https://zfin.org/ZDB-GENE-070928-31	zgc:171772 [Source:ZFIN;Acc:ZDB-GENE-070928-31]
2.96721e-25	-0.561199	0.979	0.966	4.12383e-21	1	rps4x	ENSDARG00000014690	https://zfin.org/ZDB-GENE-040927-19	ribosomal protein S4, X-linked [Source:ZFIN;Acc:ZDB-GENE-040927-19]
3.83653e-25	0.30448	0.421	0.106	5.33201e-21	1	got2b	ENSDARG00000005840	https://zfin.org/ZDB-GENE-030131-7917	glutamic-oxaloacetic transaminase 2b, mitochondrial [Source:ZFIN;Acc:ZDB-GENE-030131-7917]
4.79744e-25	0.31421	0.471	0.124	6.66748e-21	1	acat1	ENSDARG00000045888	https://zfin.org/ZDB-GENE-040808-68	acetyl-CoA acetyltransferase 1 [Source:ZFIN;Acc:ZDB-GENE-040808-68]
5.21827e-25	-0.597204	0.986	0.964	7.25236e-21	1	rpl35a	ENSDARG00000088030	https://zfin.org/ZDB-GENE-040718-190	ribosomal protein L35a [Source:ZFIN;Acc:ZDB-GENE-040718-190]
5.60994e-25	0.264288	0.321	0.067	7.7967e-21	1	slc25a11	ENSDARG00000035741	https://zfin.org/ZDB-GENE-040625-79	solute carrier family 25 (mitochondrial carrier; oxoglutarate carrier), member 11 [Source:ZFIN;Acc:ZDB-GENE-040625-79]
5.91919e-25	0.341386	0.357	0.081	8.22649e-21	1	phb2b	ENSDARG00000017728	https://zfin.org/ZDB-GENE-040718-430	prohibitin 2b [Source:ZFIN;Acc:ZDB-GENE-040718-430]
6.42842e-25	0.586203	0.964	0.526	8.93422e-21	1	atp5h	ENSDARG00000098355	https://zfin.org/ZDB-GENE-040426-1658	ATP synthase, H+ transporting, mitochondrial Fo complex, subunit d [Source:ZFIN;Acc:ZDB-GENE-040426-1658]
7.26811e-25	0.548869	0.971	0.576	1.01012e-20	1	cox4i1	ENSDARG00000032970	https://zfin.org/ZDB-GENE-030131-5175	cytochrome c oxidase subunit IV isoform 1 [Source:ZFIN;Acc:ZDB-GENE-030131-5175]
8.10782e-25	0.405961	0.729	0.25	1.12682e-20	1	prdx3	ENSDARG00000032102	https://zfin.org/ZDB-GENE-030826-18	peroxiredoxin 3 [Source:ZFIN;Acc:ZDB-GENE-030826-18]
8.81967e-25	0.456899	0.771	0.282	1.22576e-20	1	btc	ENSDARG00000098112	https://zfin.org/ZDB-GENE-050311-1	betacellulin, epidermal growth factor family member [Source:ZFIN;Acc:ZDB-GENE-050311-1]
1.0122e-24	0.324619	0.507	0.14	1.40676e-20	1	tssc4	ENSDARG00000036144	https://zfin.org/ZDB-GENE-060825-263	tumor suppressing subtransferable candidate 4 [Source:ZFIN;Acc:ZDB-GENE-060825-263]
1.04753e-24	-0.552797	0.979	0.964	1.45586e-20	1	rpl28	ENSDARG00000005791	https://zfin.org/ZDB-GENE-040930-10	ribosomal protein L28 [Source:ZFIN;Acc:ZDB-GENE-040930-10]
1.11288e-24	0.380012	0.679	0.226	1.54668e-20	1	naa20	ENSDARG00000039493	https://zfin.org/ZDB-GENE-050327-47	N(alpha)-acetyltransferase 20, NatB catalytic subunit [Source:ZFIN;Acc:ZDB-GENE-050327-47]
1.20847e-24	0.471157	0.757	0.278	1.67953e-20	1	suclg1	ENSDARG00000052712	https://zfin.org/ZDB-GENE-040912-101	succinate-CoA ligase, alpha subunit [Source:ZFIN;Acc:ZDB-GENE-040912-101]
1.72284e-24	0.257024	0.336	0.073	2.3944e-20	1	fam168b	ENSDARG00000101733	https://zfin.org/ZDB-GENE-060929-180	family with sequence similarity 168, member B [Source:ZFIN;Acc:ZDB-GENE-060929-180]
1.74409e-24	0.554449	0.871	0.399	2.42394e-20	1	ndufs7	ENSDARG00000074552	https://zfin.org/ZDB-GENE-041111-261	NADH dehydrogenase (ubiquinone) Fe-S protein 7, (NADH-coenzyme Q reductase) [Source:ZFIN;Acc:ZDB-GENE-041111-261]
1.79286e-24	0.565139	0.964	0.54	2.49172e-20	1	ndufa3	ENSDARG00000041400	https://zfin.org/ZDB-GENE-040801-18	NADH dehydrogenase (ubiquinone) 1 alpha subcomplex, 3 [Source:ZFIN;Acc:ZDB-GENE-040801-18]
1.92469e-24	-0.548309	0.993	0.962	2.67493e-20	1	rpl36a	ENSDARG00000058105	https://zfin.org/ZDB-GENE-020423-1	ribosomal protein L36A [Source:ZFIN;Acc:ZDB-GENE-020423-1]
2.10769e-24	0.515681	0.864	0.365	2.92927e-20	1	ndufb11	ENSDARG00000043467	https://zfin.org/ZDB-GENE-050309-25	NADH dehydrogenase (ubiquinone) 1 beta subcomplex, 11 [Source:ZFIN;Acc:ZDB-GENE-050309-25]
2.31772e-24	0.28996	0.293	0.059	3.22116e-20	1	si:ch211-275j6.5	ENSDARG00000097803	https://zfin.org/ZDB-GENE-130109-1	si:ch211-275j6.5 [Source:ZFIN;Acc:ZDB-GENE-130109-1]
2.69378e-24	0.414352	0.7	0.238	3.74381e-20	1	pkig	ENSDARG00000086471	https://zfin.org/ZDB-GENE-050302-97	protein kinase (cAMP-dependent, catalytic) inhibitor gamma [Source:ZFIN;Acc:ZDB-GENE-050302-97]
2.84999e-24	0.327904	0.679	0.217	3.96091e-20	1	ndufa9a	ENSDARG00000070723	https://zfin.org/ZDB-GENE-050320-20	NADH dehydrogenase (ubiquinone) 1 alpha subcomplex, 9a [Source:ZFIN;Acc:ZDB-GENE-050320-20]
3.80606e-24	0.265589	0.293	0.059	5.28967e-20	1	ccdc106a	ENSDARG00000004211	https://zfin.org/ZDB-GENE-050220-4	coiled-coil domain containing 106a [Source:ZFIN;Acc:ZDB-GENE-050220-4]
5.27892e-24	-0.526876	0.986	0.971	7.33665e-20	1	rps13	ENSDARG00000036298	https://zfin.org/ZDB-GENE-040625-52	ribosomal protein S13 [Source:ZFIN;Acc:ZDB-GENE-040625-52]
6.23608e-24	-0.578529	0.964	0.953	8.66691e-20	1	rpl13	ENSDARG00000099380	https://zfin.org/ZDB-GENE-031007-1	ribosomal protein L13 [Source:ZFIN;Acc:ZDB-GENE-031007-1]
8.75691e-24	0.323491	0.464	0.128	1.21703e-19	1	mrpl11	ENSDARG00000013075	https://zfin.org/ZDB-GENE-040718-294	mitochondrial ribosomal protein L11 [Source:ZFIN;Acc:ZDB-GENE-040718-294]
9.13596e-24	-1.01974	0.736	0.771	1.26972e-19	1	tmsb	ENSDARG00000054911	https://zfin.org/ZDB-GENE-050307-5	thymosin, beta [Source:ZFIN;Acc:ZDB-GENE-050307-5]
1.01135e-23	0.288947	0.293	0.06	1.40558e-19	1	RAMP1	ENSDARG00000056704	https://zfin.org/ZDB-GENE-040718-446	zgc:91818 [Source:ZFIN;Acc:ZDB-GENE-040718-446]
1.10529e-23	-0.602499	0.929	0.931	1.53613e-19	1	rps10	ENSDARG00000034897	https://zfin.org/ZDB-GENE-040426-1481	ribosomal protein S10 [Source:ZFIN;Acc:ZDB-GENE-040426-1481]
1.4505e-23	-0.442317	1	0.995	2.01591e-19	1	rpl32	ENSDARG00000054818	https://zfin.org/ZDB-GENE-060331-105	ribosomal protein L32 [Source:ZFIN;Acc:ZDB-GENE-060331-105]
2.99067e-23	0.417515	0.714	0.251	4.15644e-19	1	cops4	ENSDARG00000043732	https://zfin.org/ZDB-GENE-030131-4317	COP9 constitutive photomorphogenic homolog subunit 4 (Arabidopsis) [Source:ZFIN;Acc:ZDB-GENE-030131-4317]
3.09336e-23	-0.437683	0.993	0.989	4.29916e-19	1	rps27.1	ENSDARG00000023298	https://zfin.org/ZDB-GENE-050522-549	ribosomal protein S27, isoform 1 [Source:ZFIN;Acc:ZDB-GENE-050522-549]
4.74368e-23	0.283691	0.457	0.125	6.59276e-19	1	trappc6bl	ENSDARG00000033171	https://zfin.org/ZDB-GENE-040426-1602	trafficking protein particle complex 6b-like [Source:ZFIN;Acc:ZDB-GENE-040426-1602]
5.36573e-23	0.426915	0.729	0.266	7.45729e-19	1	uqcrc1	ENSDARG00000052304	https://zfin.org/ZDB-GENE-040426-1792	ubiquinol-cytochrome c reductase core protein I [Source:ZFIN;Acc:ZDB-GENE-040426-1792]
5.66215e-23	-1.15375	0.5	0.694	7.86925e-19	1	fxyd6l	ENSDARG00000097057	https://zfin.org/ZDB-GENE-071205-8	FXYD domain containing ion transport regulator 6 like [Source:ZFIN;Acc:ZDB-GENE-071205-8]
6.29271e-23	-1.07894	0.429	0.666	8.74561e-19	1	si:dkey-42i9.4	ENSDARG00000008049	https://zfin.org/ZDB-GENE-030131-8398	si:dkey-42i9.4 [Source:ZFIN;Acc:ZDB-GENE-030131-8398]
6.36011e-23	-1.32775	0.871	0.838	8.83928e-19	1	icn	ENSDARG00000009978	https://zfin.org/ZDB-GENE-030131-8599	ictacalcin [Source:ZFIN;Acc:ZDB-GENE-030131-8599]
7.82056e-23	-0.475021	0.993	0.984	1.0869e-18	1	rpl18	ENSDARG00000029533	https://zfin.org/ZDB-GENE-040801-165	ribosomal protein L18 [Source:ZFIN;Acc:ZDB-GENE-040801-165]
8.66842e-23	-0.575066	0.971	0.94	1.20474e-18	1	rps3a	ENSDARG00000035692	https://zfin.org/ZDB-GENE-030131-9184	ribosomal protein S3A [Source:ZFIN;Acc:ZDB-GENE-030131-9184]
9.51752e-23	0.277557	0.457	0.126	1.32275e-18	1	mob1ba	ENSDARG00000009169	https://zfin.org/ZDB-GENE-040426-919	MOB kinase activator 1Ba [Source:ZFIN;Acc:ZDB-GENE-040426-919]
1.75569e-22	0.510761	0.957	0.599	2.44006e-18	1	cox8a	ENSDARG00000095273	https://zfin.org/ZDB-GENE-030131-9136	cytochrome c oxidase subunit VIIIA (ubiquitous) [Source:ZFIN;Acc:ZDB-GENE-030131-9136]
1.80324e-22	0.355326	0.536	0.167	2.50614e-18	1	si:dkey-95p16.2	ENSDARG00000093484	https://zfin.org/ZDB-GENE-081105-65	si:dkey-95p16.2 [Source:ZFIN;Acc:ZDB-GENE-081105-65]
2.44745e-22	-0.487857	1	0.987	3.40146e-18	1	rps8a	ENSDARG00000055996	https://zfin.org/ZDB-GENE-030131-8626	ribosomal protein S8a [Source:ZFIN;Acc:ZDB-GENE-030131-8626]
2.80806e-22	0.516349	0.871	0.396	3.90264e-18	1	ndufa11	ENSDARG00000042777	https://zfin.org/ZDB-GENE-040426-1631	NADH dehydrogenase (ubiquinone) 1 alpha subcomplex, 11 [Source:ZFIN;Acc:ZDB-GENE-040426-1631]
3.52903e-22	-1.21515	0.436	0.663	4.90464e-18	1	dap1b	ENSDARG00000036895	https://zfin.org/ZDB-GENE-000511-4	death associated protein 1b [Source:ZFIN;Acc:ZDB-GENE-000511-4]
3.96203e-22	-0.570301	0.993	0.98	5.50643e-18	1	rplp2l	ENSDARG00000011201	https://zfin.org/ZDB-GENE-070327-2	ribosomal protein, large P2, like [Source:ZFIN;Acc:ZDB-GENE-070327-2]
4.0876e-22	0.391878	0.529	0.165	5.68094e-18	1	txnipa	ENSDARG00000036107	https://zfin.org/ZDB-GENE-030804-10	thioredoxin interacting protein a [Source:ZFIN;Acc:ZDB-GENE-030804-10]
5.96816e-22	-0.551834	0.936	0.928	8.29455e-18	1	gnb2l1	ENSDARG00000041619	https://zfin.org/ZDB-GENE-990415-89	guanine nucleotide binding protein (G protein), beta polypeptide 2-like 1 [Source:ZFIN;Acc:ZDB-GENE-990415-89]
8.11528e-22	-1.93134	0.721	0.775	1.12786e-17	1	si:ch211-229d2.5	ENSDARG00000079119	https://zfin.org/ZDB-GENE-121214-200	si:ch211-229d2.5 [Source:ZFIN;Acc:ZDB-GENE-121214-200]
8.2101e-22	-1.26185	0.35	0.619	1.14104e-17	1	zfp36l1b	ENSDARG00000021443	https://zfin.org/ZDB-GENE-030131-2391	zinc finger protein 36, C3H type-like 1b [Source:ZFIN;Acc:ZDB-GENE-030131-2391]
1.13407e-21	-0.479982	1	0.987	1.57612e-17	1	rpl7a	ENSDARG00000019230	https://zfin.org/ZDB-GENE-031001-9	ribosomal protein L7a [Source:ZFIN;Acc:ZDB-GENE-031001-9]
1.44953e-21	0.357358	1	0.976	2.01456e-17	1	mt-cyb	ENSDARG00000063924	https://zfin.org/ZDB-GENE-011205-17	cytochrome b, mitochondrial [Source:ZFIN;Acc:ZDB-GENE-011205-17]
1.51174e-21	-0.601314	0.964	0.922	2.10101e-17	1	rpl38	ENSDARG00000006413	https://zfin.org/ZDB-GENE-030131-8752	ribosomal protein L38 [Source:ZFIN;Acc:ZDB-GENE-030131-8752]
2.38079e-21	0.425221	0.829	0.343	3.30882e-17	1	ndufs4	ENSDARG00000052840	https://zfin.org/ZDB-GENE-050522-421	NADH dehydrogenase (ubiquinone) Fe-S protein 4, (NADH-coenzyme Q reductase) [Source:ZFIN;Acc:ZDB-GENE-050522-421]
2.44431e-21	-0.481259	1	0.986	3.3971e-17	1	rps12	ENSDARG00000036875	https://zfin.org/ZDB-GENE-030131-8951	ribosomal protein S12 [Source:ZFIN;Acc:ZDB-GENE-030131-8951]
2.54001e-21	-0.483973	1	0.978	3.53011e-17	1	rpl9	ENSDARG00000037350	https://zfin.org/ZDB-GENE-030131-8646	ribosomal protein L9 [Source:ZFIN;Acc:ZDB-GENE-030131-8646]
3.67778e-21	0.403357	0.843	0.341	5.11137e-17	1	ndufv3	ENSDARG00000090389	https://zfin.org/ZDB-GENE-030131-6500	NADH dehydrogenase (ubiquinone) flavoprotein 3 [Source:ZFIN;Acc:ZDB-GENE-030131-6500]
3.75528e-21	0.484711	0.971	0.597	5.21909e-17	1	zgc:193541	ENSDARG00000092873	https://zfin.org/ZDB-GENE-081022-15	zgc:193541 [Source:ZFIN;Acc:ZDB-GENE-081022-15]
4.50854e-21	0.258307	0.55	0.172	6.26597e-17	1	MAF1	ENSDARG00000036489	https://zfin.org/ZDB-GENE-050913-28	zgc:112356 [Source:ZFIN;Acc:ZDB-GENE-050913-28]
4.74622e-21	-0.493442	0.986	0.978	6.5963e-17	1	rpl3	ENSDARG00000003599	https://zfin.org/ZDB-GENE-030131-1291	ribosomal protein L3 [Source:ZFIN;Acc:ZDB-GENE-030131-1291]
6.84296e-21	0.510997	0.936	0.499	9.51035e-17	1	ndufb8	ENSDARG00000010113	https://zfin.org/ZDB-GENE-040426-1858	NADH dehydrogenase (ubiquinone) 1 beta subcomplex, 8 [Source:ZFIN;Acc:ZDB-GENE-040426-1858]
7.24539e-21	0.478667	0.964	0.521	1.00696e-16	1	sub1a	ENSDARG00000053446	https://zfin.org/ZDB-GENE-050522-151	SUB1 homolog, transcriptional regulator a [Source:ZFIN;Acc:ZDB-GENE-050522-151]
9.03213e-21	0.272427	0.3	0.069	1.25529e-16	1	atpv0e2	ENSDARG00000059057	https://zfin.org/ZDB-GENE-050522-135	ATPase, H+ transporting V0 subunit e2 [Source:ZFIN;Acc:ZDB-GENE-050522-135]
9.33959e-21	0.288377	0.257	0.053	1.29802e-16	1	kpnb3	ENSDARG00000040245	https://zfin.org/ZDB-GENE-030424-2	karyopherin (importin) beta 3 [Source:ZFIN;Acc:ZDB-GENE-030424-2]
9.74601e-21	-0.520511	0.964	0.948	1.3545e-16	1	rps14	ENSDARG00000036629	https://zfin.org/ZDB-GENE-030131-8631	ribosomal protein S14 [Source:ZFIN;Acc:ZDB-GENE-030131-8631]
1.08366e-20	0.271995	0.214	0.039	1.50608e-16	1	ldha	ENSDARG00000101251	https://zfin.org/ZDB-GENE-991026-5	lactate dehydrogenase A4 [Source:ZFIN;Acc:ZDB-GENE-991026-5]
1.18705e-20	-0.450829	0.971	0.983	1.64976e-16	1	rps16	ENSDARG00000045487	https://zfin.org/ZDB-GENE-050506-107	ribosomal protein S16 [Source:ZFIN;Acc:ZDB-GENE-050506-107]
1.36845e-20	0.501644	0.943	0.508	1.90188e-16	1	si:ch1073-325m22.2	ENSDARG00000095921	https://zfin.org/ZDB-GENE-030131-6614	si:ch1073-325m22.2 [Source:ZFIN;Acc:ZDB-GENE-030131-6614]
1.46071e-20	0.287414	0.314	0.076	2.03009e-16	1	nap1l4b	ENSDARG00000068868	https://zfin.org/ZDB-GENE-041114-168	nucleosome assembly protein 1-like 4b [Source:ZFIN;Acc:ZDB-GENE-041114-168]
1.48015e-20	-0.431391	1	0.99	2.05711e-16	1	rpl39	ENSDARG00000036316	https://zfin.org/ZDB-GENE-040625-51	ribosomal protein L39 [Source:ZFIN;Acc:ZDB-GENE-040625-51]
1.55462e-20	0.493146	0.993	0.642	2.16061e-16	1	atp5j2	ENSDARG00000037867	https://zfin.org/ZDB-GENE-050309-87	ATP synthase, H+ transporting, mitochondrial Fo complex, subunit F2 [Source:ZFIN;Acc:ZDB-GENE-050309-87]
1.6245e-20	0.272667	0.271	0.06	2.25773e-16	1	hccsb	ENSDARG00000099358	https://zfin.org/ZDB-GENE-000607-78	holocytochrome c synthase b [Source:ZFIN;Acc:ZDB-GENE-000607-78]
1.9057e-20	0.541591	0.964	0.596	2.64854e-16	1	atp5j	ENSDARG00000014313	https://zfin.org/ZDB-GENE-040426-2534	ATP synthase, H+ transporting, mitochondrial Fo complex, subunit F6 [Source:ZFIN;Acc:ZDB-GENE-040426-2534]
1.90693e-20	-1.86787	0.886	0.845	2.65025e-16	1	si:dkeyp-110c7.4	ENSDARG00000100476	https://zfin.org/ZDB-GENE-070705-532	si:dkeyp-110c7.4 [Source:ZFIN;Acc:ZDB-GENE-070705-532]
2.02363e-20	0.259636	0.229	0.044	2.81244e-16	1	lbr	ENSDARG00000014013	https://zfin.org/ZDB-GENE-030804-11	lamin B receptor [Source:ZFIN;Acc:ZDB-GENE-030804-11]
2.07605e-20	0.284064	0.443	0.13	2.88529e-16	1	tpi1b	ENSDARG00000040988	https://zfin.org/ZDB-GENE-020416-4	triosephosphate isomerase 1b [Source:ZFIN;Acc:ZDB-GENE-020416-4]
2.29432e-20	0.476024	1	0.747	3.18864e-16	1	dynll1	ENSDARG00000058454	https://zfin.org/ZDB-GENE-040426-1961	dynein, light chain, LC8-type 1 [Source:ZFIN;Acc:ZDB-GENE-040426-1961]
2.30883e-20	-0.483192	1	0.962	3.20882e-16	1	rpl10a	ENSDARG00000042905	https://zfin.org/ZDB-GENE-030131-2025	ribosomal protein L10a [Source:ZFIN;Acc:ZDB-GENE-030131-2025]
2.65746e-20	-0.464468	1	0.974	3.69334e-16	1	rpl23	ENSDARG00000053457	https://zfin.org/ZDB-GENE-030131-8756	ribosomal protein L23 [Source:ZFIN;Acc:ZDB-GENE-030131-8756]
3.84823e-20	-0.493156	0.979	0.974	5.34827e-16	1	rps9	ENSDARG00000011405	https://zfin.org/ZDB-GENE-010724-15	ribosomal protein S9 [Source:ZFIN;Acc:ZDB-GENE-010724-15]
4.21129e-20	0.491732	0.929	0.515	5.85286e-16	1	atp5d	ENSDARG00000019404	https://zfin.org/ZDB-GENE-030131-7649	ATP synthase, H+ transporting, mitochondrial F1 complex, delta subunit [Source:ZFIN;Acc:ZDB-GENE-030131-7649]
4.86499e-20	-0.492016	1	0.985	6.76137e-16	1	rpsa	ENSDARG00000019181	https://zfin.org/ZDB-GENE-040426-811	ribosomal protein SA [Source:ZFIN;Acc:ZDB-GENE-040426-811]
5.71098e-20	-0.902895	0.621	0.725	7.93712e-16	1	cldn7b	ENSDARG00000014047	https://zfin.org/ZDB-GENE-001103-5	claudin 7b [Source:ZFIN;Acc:ZDB-GENE-001103-5]
6.88912e-20	-1.21553	0.386	0.626	9.5745e-16	1	sparc	ENSDARG00000019353	https://zfin.org/ZDB-GENE-030131-9	secreted protein, acidic, cysteine-rich (osteonectin) [Source:ZFIN;Acc:ZDB-GENE-030131-9]
7.20438e-20	0.463897	0.793	0.351	1.00126e-15	1	cyc1	ENSDARG00000038075	https://zfin.org/ZDB-GENE-031105-2	cytochrome c-1 [Source:ZFIN;Acc:ZDB-GENE-031105-2]
7.20848e-20	0.312459	0.55	0.182	1.00183e-15	1	ppid	ENSDARG00000038835	https://zfin.org/ZDB-GENE-040625-34	peptidylprolyl isomerase D [Source:ZFIN;Acc:ZDB-GENE-040625-34]
7.41557e-20	0.300281	0.593	0.201	1.03062e-15	1	lamtor5	ENSDARG00000090194	https://zfin.org/ZDB-GENE-110411-193	late endosomal/lysosomal adaptor, MAPK and MTOR activator 5 [Source:ZFIN;Acc:ZDB-GENE-110411-193]
8.95029e-20	-0.49703	0.986	0.957	1.24391e-15	1	rpl27	ENSDARG00000015128	https://zfin.org/ZDB-GENE-030131-4343	ribosomal protein L27 [Source:ZFIN;Acc:ZDB-GENE-030131-4343]
9.02168e-20	-0.893714	0.657	0.726	1.25383e-15	1	ssr4	ENSDARG00000019444	https://zfin.org/ZDB-GENE-030131-4900	signal sequence receptor, delta [Source:ZFIN;Acc:ZDB-GENE-030131-4900]
9.15998e-20	-1.4677	0.714	0.739	1.27305e-15	1	si:ch211-117m20.5	ENSDARG00000091996	https://zfin.org/ZDB-GENE-030131-12	si:ch211-117m20.5 [Source:ZFIN;Acc:ZDB-GENE-030131-12]
1.47701e-19	0.277208	0.679	0.237	2.05274e-15	1	atp6v0ca	ENSDARG00000057853	https://zfin.org/ZDB-GENE-020419-23	ATPase, H+ transporting, lysosomal, V0 subunit ca [Source:ZFIN;Acc:ZDB-GENE-020419-23]
1.75737e-19	-1.22977	0.514	0.677	2.4424e-15	1	nfkbiab	ENSDARG00000007693	https://zfin.org/ZDB-GENE-030131-1819	nuclear factor of kappa light polypeptide gene enhancer in B-cells inhibitor, alpha b [Source:ZFIN;Acc:ZDB-GENE-030131-1819]
1.79612e-19	0.321119	0.493	0.158	2.49624e-15	1	ufd1l	ENSDARG00000010051	https://zfin.org/ZDB-GENE-040718-150	ubiquitin fusion degradation 1 like (yeast) [Source:ZFIN;Acc:ZDB-GENE-040718-150]
1.82304e-19	0.432044	0.864	0.393	2.53366e-15	1	tceb1b	ENSDARG00000045359	https://zfin.org/ZDB-GENE-040718-138	transcription elongation factor B (SIII), polypeptide 1b [Source:ZFIN;Acc:ZDB-GENE-040718-138]
2.07203e-19	0.326586	0.5	0.161	2.87971e-15	1	mrps18c	ENSDARG00000069624	https://zfin.org/ZDB-GENE-060503-609	mitochondrial ribosomal protein S18C [Source:ZFIN;Acc:ZDB-GENE-060503-609]
2.47004e-19	-0.476037	0.986	0.957	3.43286e-15	1	rpl30	ENSDARG00000035871	https://zfin.org/ZDB-GENE-030131-8657	ribosomal protein L30 [Source:ZFIN;Acc:ZDB-GENE-030131-8657]
2.47335e-19	0.537308	0.943	0.546	3.43747e-15	1	psmb7	ENSDARG00000037962	https://zfin.org/ZDB-GENE-001208-4	proteasome subunit beta 7 [Source:ZFIN;Acc:ZDB-GENE-001208-4]
2.93167e-19	-1.36724	0.386	0.611	4.07444e-15	1	pabpc1b	ENSDARG00000021140	https://zfin.org/ZDB-GENE-050308-1	poly A binding protein, cytoplasmic 1 b [Source:ZFIN;Acc:ZDB-GENE-050308-1]
2.99877e-19	-1.09792	0.393	0.62	4.16769e-15	1	si:dkey-87o1.2	ENSDARG00000095796	https://zfin.org/ZDB-GENE-110411-217	si:dkey-87o1.2 [Source:ZFIN;Acc:ZDB-GENE-110411-217]
3.3499e-19	0.294314	0.579	0.198	4.6557e-15	1	si:ch211-68a17.7	ENSDARG00000045797	https://zfin.org/ZDB-GENE-100427-3	si:ch211-68a17.7 [Source:ZFIN;Acc:ZDB-GENE-100427-3]
4.01918e-19	0.371408	0.707	0.274	5.58585e-15	1	ap1m2	ENSDARG00000096454	https://zfin.org/ZDB-GENE-041114-20	adaptor-related protein complex 1, mu 2 subunit [Source:ZFIN;Acc:ZDB-GENE-041114-20]
4.66446e-19	-1.2024	0.386	0.613	6.48267e-15	1	mcl1b	ENSDARG00000008363	https://zfin.org/ZDB-GENE-030825-1	myeloid cell leukemia 1b [Source:ZFIN;Acc:ZDB-GENE-030825-1]
5.67212e-19	-0.407485	0.993	0.986	7.88311e-15	1	rpl19	ENSDARG00000013307	https://zfin.org/ZDB-GENE-040426-2290	ribosomal protein L19 [Source:ZFIN;Acc:ZDB-GENE-040426-2290]
5.76213e-19	0.362979	1	0.945	8.00821e-15	1	mt-atp6	ENSDARG00000063911	https://zfin.org/ZDB-GENE-011205-18	ATP synthase 6, mitochondrial [Source:ZFIN;Acc:ZDB-GENE-011205-18]
6.01754e-19	0.40419	0.829	0.353	8.36318e-15	1	dynlrb1	ENSDARG00000021582	https://zfin.org/ZDB-GENE-040426-989	dynein, light chain, roadblock-type 1 [Source:ZFIN;Acc:ZDB-GENE-040426-989]
6.03349e-19	0.458824	0.893	0.429	8.38535e-15	1	ndufa2	ENSDARG00000021984	https://zfin.org/ZDB-GENE-050522-377	NADH dehydrogenase (ubiquinone) 1 alpha subcomplex, 2 [Source:ZFIN;Acc:ZDB-GENE-050522-377]
7.01078e-19	0.323684	0.5	0.164	9.74358e-15	1	ube2a	ENSDARG00000098466	https://zfin.org/ZDB-GENE-030616-72	ubiquitin-conjugating enzyme E2A (RAD6 homolog) [Source:ZFIN;Acc:ZDB-GENE-030616-72]
9.64492e-19	0.269093	0.529	0.175	1.34045e-14	1	uqcrc2b	ENSDARG00000071691	https://zfin.org/ZDB-GENE-030131-1269	ubiquinol-cytochrome c reductase core protein IIb [Source:ZFIN;Acc:ZDB-GENE-030131-1269]
1.0334e-18	-0.450346	0.993	0.972	1.43622e-14	1	rps6	ENSDARG00000019778	https://zfin.org/ZDB-GENE-040801-8	ribosomal protein S6 [Source:ZFIN;Acc:ZDB-GENE-040801-8]
1.07845e-18	0.258086	0.521	0.172	1.49883e-14	1	hsd17b10	ENSDARG00000017781	https://zfin.org/ZDB-GENE-041010-201	hydroxysteroid (17-beta) dehydrogenase 10 [Source:ZFIN;Acc:ZDB-GENE-041010-201]
1.44708e-18	0.271603	0.671	0.243	2.01115e-14	1	chchd2	ENSDARG00000059304	https://zfin.org/ZDB-GENE-040426-1737	coiled-coil-helix-coiled-coil-helix domain containing 2 [Source:ZFIN;Acc:ZDB-GENE-040426-1737]
1.62206e-18	0.420557	1	0.657	2.25434e-14	1	atp5l	ENSDARG00000011841	https://zfin.org/ZDB-GENE-030131-5177	ATP synthase, H+ transporting, mitochondrial F0 complex, subunit g [Source:ZFIN;Acc:ZDB-GENE-030131-5177]
1.76768e-18	0.25972	0.521	0.171	2.45672e-14	1	pet100	ENSDARG00000098017	https://zfin.org/ZDB-GENE-131121-608	PET100 homolog [Source:ZFIN;Acc:ZDB-GENE-131121-608]
2.04564e-18	0.279984	0.414	0.125	2.84304e-14	1	anapc13	ENSDARG00000078435	https://zfin.org/ZDB-GENE-091204-298	anaphase promoting complex subunit 13 [Source:ZFIN;Acc:ZDB-GENE-091204-298]
2.70971e-18	-1.29023	0.229	0.542	3.76595e-14	1	si:dkey-16l2.20	ENSDARG00000098191	https://zfin.org/ZDB-GENE-141212-380	si:dkey-16l2.20 [Source:ZFIN;Acc:ZDB-GENE-141212-380]
2.78369e-18	-1.08348	0.779	0.755	3.86877e-14	1	krt15	ENSDARG00000036840	https://zfin.org/ZDB-GENE-040426-2931	keratin 15 [Source:ZFIN;Acc:ZDB-GENE-040426-2931]
3.06567e-18	-0.614428	0.921	0.899	4.26067e-14	1	glulb	ENSDARG00000100003	https://zfin.org/ZDB-GENE-030131-8417	glutamate-ammonia ligase (glutamine synthase) b [Source:ZFIN;Acc:ZDB-GENE-030131-8417]
3.33307e-18	-1.02026	0.393	0.613	4.6323e-14	1	ywhaz	ENSDARG00000032575	https://zfin.org/ZDB-GENE-030131-8554	tyrosine 3-monooxygenase/tryptophan 5-monooxygenase activation protein, zeta polypeptide [Source:ZFIN;Acc:ZDB-GENE-030131-8554]
3.54037e-18	-0.553826	0.943	0.887	4.9204e-14	1	fkbp1aa	ENSDARG00000022684	https://zfin.org/ZDB-GENE-030131-7275	FK506 binding protein 1Aa [Source:ZFIN;Acc:ZDB-GENE-030131-7275]
3.97714e-18	-0.383876	1	0.995	5.52742e-14	1	rps19	ENSDARG00000030602	https://zfin.org/ZDB-GENE-040426-1716	ribosomal protein S19 [Source:ZFIN;Acc:ZDB-GENE-040426-1716]
4.20226e-18	0.307769	0.407	0.123	5.8403e-14	1	pkp3b	ENSDARG00000079438	https://zfin.org/ZDB-GENE-130530-870	plakophilin 3b [Source:ZFIN;Acc:ZDB-GENE-130530-870]
4.82672e-18	-1.15047	0.193	0.513	6.70818e-14	1	moxd1l	ENSDARG00000069296	https://zfin.org/ZDB-GENE-060126-3	monooxygenase, DBH-like 1, like [Source:ZFIN;Acc:ZDB-GENE-060126-3]
5.0627e-18	0.300049	0.336	0.093	7.03614e-14	1	herc1	ENSDARG00000077901	https://zfin.org/ZDB-GENE-030131-8542	HECT and RLD domain containing E3 ubiquitin protein ligase family member 1 [Source:ZFIN;Acc:ZDB-GENE-030131-8542]
5.35172e-18	-0.737066	0.771	0.781	7.43782e-14	1	hnrnpa0l	ENSDARG00000036161	https://zfin.org/ZDB-GENE-030131-618	heterogeneous nuclear ribonucleoprotein A0, like [Source:ZFIN;Acc:ZDB-GENE-030131-618]
5.53157e-18	0.261973	0.464	0.148	7.68777e-14	1	lamtor2	ENSDARG00000039872	https://zfin.org/ZDB-GENE-040801-63	late endosomal/lysosomal adaptor, MAPK and MTOR activator 2 [Source:ZFIN;Acc:ZDB-GENE-040801-63]
5.75705e-18	-1.14482	0.371	0.61	8.00115e-14	1	gsta.1	ENSDARG00000090228	https://zfin.org/ZDB-GENE-040426-2720	glutathione S-transferase, alpha tandem duplicate 1 [Source:ZFIN;Acc:ZDB-GENE-040426-2720]
5.86108e-18	-0.437367	1	0.988	8.14573e-14	1	rps2	ENSDARG00000077291	https://zfin.org/ZDB-GENE-040426-2454	ribosomal protein S2 [Source:ZFIN;Acc:ZDB-GENE-040426-2454]
5.94269e-18	0.363633	0.8	0.338	8.25916e-14	1	ndufab1a	ENSDARG00000058463	https://zfin.org/ZDB-GENE-040801-1	NADH dehydrogenase (ubiquinone) 1, alpha/beta subcomplex, 1a [Source:ZFIN;Acc:ZDB-GENE-040801-1]
6.45759e-18	0.404436	0.9	0.427	8.97475e-14	1	htatip2	ENSDARG00000028386	https://zfin.org/ZDB-GENE-001219-1	HIV-1 Tat interactive protein 2 [Source:ZFIN;Acc:ZDB-GENE-001219-1]
6.56399e-18	0.267861	0.443	0.14	9.12263e-14	1	MZT1	ENSDARG00000096668	https://zfin.org/ZDB-GENE-090313-33	si:dkey-15d12.2 [Source:ZFIN;Acc:ZDB-GENE-090313-33]
8.54481e-18	0.282438	0.693	0.256	1.18756e-13	1	chrac1	ENSDARG00000042337	https://zfin.org/ZDB-GENE-050227-18	chromatin accessibility complex 1 [Source:ZFIN;Acc:ZDB-GENE-050227-18]
8.56763e-18	-1.00613	0.464	0.635	1.19073e-13	1	sec61b	ENSDARG00000076568	https://zfin.org/ZDB-GENE-040718-260	Sec61 translocon beta subunit [Source:ZFIN;Acc:ZDB-GENE-040718-260]
1.3775e-17	0.290075	0.6	0.22	1.91444e-13	1	sdhdb	ENSDARG00000030139	https://zfin.org/ZDB-GENE-040822-17	succinate dehydrogenase complex, subunit D, integral membrane protein b [Source:ZFIN;Acc:ZDB-GENE-040822-17]
1.57691e-17	0.388204	0.679	0.276	2.1916e-13	1	psmc6	ENSDARG00000037038	https://zfin.org/ZDB-GENE-030131-304	proteasome 26S subunit, ATPase 6 [Source:ZFIN;Acc:ZDB-GENE-030131-304]
2.01943e-17	0.397123	0.893	0.442	2.80661e-13	1	ndufb10	ENSDARG00000028889	https://zfin.org/ZDB-GENE-040426-1691	NADH dehydrogenase (ubiquinone) 1 beta subcomplex, 10 [Source:ZFIN;Acc:ZDB-GENE-040426-1691]
2.06992e-17	-1.43536	0.443	0.614	2.87677e-13	1	hopx	ENSDARG00000089368	https://zfin.org/ZDB-GENE-031016-2	HOP homeobox [Source:ZFIN;Acc:ZDB-GENE-031016-2]
3.47312e-17	0.321492	0.414	0.132	4.82694e-13	1	hnrnpa0a	ENSDARG00000105465	https://zfin.org/
3.92661e-17	0.292147	0.6	0.221	5.4572e-13	1	fam213aa	ENSDARG00000057378	https://zfin.org/ZDB-GENE-030131-2459	family with sequence similarity 213, member Aa [Source:ZFIN;Acc:ZDB-GENE-030131-2459]
4.10149e-17	-0.809087	0.836	0.794	5.70025e-13	1	si:ch73-1a9.3	ENSDARG00000103919	https://zfin.org/ZDB-GENE-141216-84	si:ch73-1a9.3 [Source:ZFIN;Acc:ZDB-GENE-141216-84]
4.58041e-17	0.260284	0.429	0.137	6.36586e-13	1	mrpl35	ENSDARG00000070589	https://zfin.org/ZDB-GENE-060929-1082	mitochondrial ribosomal protein L35 [Source:ZFIN;Acc:ZDB-GENE-060929-1082]
5.38652e-17	0.383011	0.786	0.35	7.48619e-13	1	copz1	ENSDARG00000017844	https://zfin.org/ZDB-GENE-000406-6	coatomer protein complex, subunit zeta 1 [Source:ZFIN;Acc:ZDB-GENE-000406-6]
6.23213e-17	-1.30118	0.386	0.61	8.66142e-13	1	aqp3a	ENSDARG00000003808	https://zfin.org/ZDB-GENE-040426-2826	aquaporin 3a [Source:ZFIN;Acc:ZDB-GENE-040426-2826]
6.69575e-17	-0.71957	0.736	0.756	9.30576e-13	1	rpl5b	ENSDARG00000015862	https://zfin.org/ZDB-GENE-040625-93	ribosomal protein L5b [Source:ZFIN;Acc:ZDB-GENE-040625-93]
8.25414e-17	0.408916	0.964	0.493	1.14716e-12	1	ndufa5	ENSDARG00000039346	https://zfin.org/ZDB-GENE-050320-17	NADH dehydrogenase (ubiquinone) 1 alpha subcomplex, 5 [Source:ZFIN;Acc:ZDB-GENE-050320-17]
8.56467e-17	0.365009	0.979	0.782	1.19032e-12	1	cox6b2	ENSDARG00000037860	https://zfin.org/ZDB-GENE-040426-1566	cytochrome c oxidase subunit VIb polypeptide 2 [Source:ZFIN;Acc:ZDB-GENE-040426-1566]
8.80874e-17	0.306445	0.636	0.243	1.22424e-12	1	ppdpfa	ENSDARG00000007682	https://zfin.org/ZDB-GENE-030219-204	pancreatic progenitor cell differentiation and proliferation factor a [Source:ZFIN;Acc:ZDB-GENE-030219-204]
9.91197e-17	0.325848	0.729	0.299	1.37757e-12	1	CABZ01076616.1	ENSDARG00000087456	https://zfin.org/
1.3015e-16	-1.06367	0.407	0.595	1.80882e-12	1	sox3	ENSDARG00000053569	https://zfin.org/ZDB-GENE-980526-333	SRY (sex determining region Y)-box 3 [Source:ZFIN;Acc:ZDB-GENE-980526-333]
1.55919e-16	0.257769	0.393	0.123	2.16696e-12	1	tnnt2d	ENSDARG00000002988	https://zfin.org/ZDB-GENE-050626-97	troponin T2d, cardiac [Source:ZFIN;Acc:ZDB-GENE-050626-97]
1.57121e-16	-0.396327	1	0.985	2.18366e-12	1	rps7	ENSDARG00000042566	https://zfin.org/ZDB-GENE-040426-1718	ribosomal protein S7 [Source:ZFIN;Acc:ZDB-GENE-040426-1718]
1.75693e-16	-0.486672	0.957	0.914	2.44178e-12	1	rps26	ENSDARG00000037071	https://zfin.org/ZDB-GENE-030131-8606	ribosomal protein S26 [Source:ZFIN;Acc:ZDB-GENE-030131-8606]
1.99199e-16	0.422526	0.921	0.48	2.76847e-12	1	uqcrh	ENSDARG00000059128	https://zfin.org/ZDB-GENE-051030-93	ubiquinol-cytochrome c reductase hinge protein [Source:ZFIN;Acc:ZDB-GENE-051030-93]
2.65372e-16	-0.427678	0.993	0.964	3.68815e-12	1	rps18	ENSDARG00000100392	https://zfin.org/ZDB-GENE-020419-20	ribosomal protein S18 [Source:ZFIN;Acc:ZDB-GENE-020419-20]
3.24892e-16	-1.11153	0.329	0.556	4.51534e-12	1	si:ch211-39i22.1	ENSDARG00000087508	https://zfin.org/ZDB-GENE-120215-258	si:ch211-39i22.1 [Source:ZFIN;Acc:ZDB-GENE-120215-258]
3.2584e-16	0.266952	0.414	0.134	4.52852e-12	1	chchd6b	ENSDARG00000045978	https://zfin.org/ZDB-GENE-041114-95	coiled-coil-helix-coiled-coil-helix domain containing 6b [Source:ZFIN;Acc:ZDB-GENE-041114-95]
3.40659e-16	-0.360075	1	0.988	4.73448e-12	1	rpl18a	ENSDARG00000025073	https://zfin.org/ZDB-GENE-040426-1071	ribosomal protein L18a [Source:ZFIN;Acc:ZDB-GENE-040426-1071]
3.71879e-16	0.414607	0.964	0.621	5.16838e-12	1	slc25a3b	ENSDARG00000025566	https://zfin.org/ZDB-GENE-040426-1916	solute carrier family 25 (mitochondrial carrier; phosphate carrier), member 3b [Source:ZFIN;Acc:ZDB-GENE-040426-1916]
3.73168e-16	0.385715	0.814	0.37	5.18629e-12	1	arf2b	ENSDARG00000016393	https://zfin.org/ZDB-GENE-030131-5234	ADP-ribosylation factor 2b [Source:ZFIN;Acc:ZDB-GENE-030131-5234]
3.7353e-16	0.254562	0.243	0.059	5.19131e-12	1	tomm34	ENSDARG00000001557	https://zfin.org/ZDB-GENE-030131-2081	translocase of outer mitochondrial membrane 34 [Source:ZFIN;Acc:ZDB-GENE-030131-2081]
4.12886e-16	0.383716	0.943	0.496	5.73829e-12	1	ndufb7	ENSDARG00000033789	https://zfin.org/ZDB-GENE-040426-1886	NADH dehydrogenase (ubiquinone) 1 beta subcomplex, 7 [Source:ZFIN;Acc:ZDB-GENE-040426-1886]
4.79566e-16	0.372069	1	0.812	6.66501e-12	1	actb2	ENSDARG00000037870	https://zfin.org/ZDB-GENE-000329-3	actin, beta 2 [Source:ZFIN;Acc:ZDB-GENE-000329-3]
5.73992e-16	0.404042	0.786	0.378	7.97735e-12	1	ndufab1b	ENSDARG00000014915	https://zfin.org/ZDB-GENE-030131-4437	NADH dehydrogenase (ubiquinone) 1, alpha/beta subcomplex, 1b [Source:ZFIN;Acc:ZDB-GENE-030131-4437]
6.87393e-16	-1.09022	0.736	0.743	9.55339e-12	1	TMSB15A	ENSDARG00000104181	https://zfin.org/ZDB-GENE-030131-8575	si:dkey-152p16.6 [Source:ZFIN;Acc:ZDB-GENE-030131-8575]
8.21251e-16	0.303883	0.743	0.314	1.14137e-11	1	ndufs3	ENSDARG00000015385	https://zfin.org/ZDB-GENE-050417-274	NADH dehydrogenase (ubiquinone) Fe-S protein 3, (NADH-coenzyme Q reductase) [Source:ZFIN;Acc:ZDB-GENE-050417-274]
1.09047e-15	0.275789	0.7	0.28	1.51554e-11	1	cct7	ENSDARG00000007385	https://zfin.org/ZDB-GENE-020419-7	chaperonin containing TCP1, subunit 7 (eta) [Source:ZFIN;Acc:ZDB-GENE-020419-7]
1.32529e-15	0.273469	0.536	0.197	1.84189e-11	1	ndrg3b	ENSDARG00000010052	https://zfin.org/ZDB-GENE-030131-5606	ndrg family member 3b [Source:ZFIN;Acc:ZDB-GENE-030131-5606]
1.63319e-15	0.36534	0.986	0.826	2.26981e-11	1	atp5g3b	ENSDARG00000009447	https://zfin.org/ZDB-GENE-020814-1	ATP synthase, H+ transporting, mitochondrial F0 complex, subunit c3 (subunit 9) b [Source:ZFIN;Acc:ZDB-GENE-020814-1]
1.76215e-15	0.390943	0.879	0.483	2.44904e-11	1	h1f0	ENSDARG00000038559	https://zfin.org/ZDB-GENE-030131-337	H1 histone family, member 0 [Source:ZFIN;Acc:ZDB-GENE-030131-337]
3.38457e-15	-0.417435	0.986	0.977	4.70387e-11	1	rpl7	ENSDARG00000007320	https://zfin.org/ZDB-GENE-030131-8654	ribosomal protein L7 [Source:ZFIN;Acc:ZDB-GENE-030131-8654]
3.51628e-15	-1.02738	0.407	0.595	4.88693e-11	1	si:ch211-152c2.3	ENSDARG00000045898	https://zfin.org/ZDB-GENE-030131-9914	si:ch211-152c2.3 [Source:ZFIN;Acc:ZDB-GENE-030131-9914]
3.74947e-15	-0.535344	0.893	0.844	5.21102e-11	1	rpl23a	ENSDARG00000006316	https://zfin.org/ZDB-GENE-030131-7479	ribosomal protein L23a [Source:ZFIN;Acc:ZDB-GENE-030131-7479]
3.9281e-15	-1.70015	0.95	0.888	5.45927e-11	1	si:dkey-4p15.5	ENSDARG00000086272	https://zfin.org/ZDB-GENE-121214-193	si:dkey-4p15.5 [Source:ZFIN;Acc:ZDB-GENE-121214-193]
4.01229e-15	-1.28532	0.236	0.503	5.57628e-11	1	slc1a3a	ENSDARG00000104431	https://zfin.org/ZDB-GENE-030131-2159	solute carrier family 1 (glial high affinity glutamate transporter), member 3a [Source:ZFIN;Acc:ZDB-GENE-030131-2159]
4.56148e-15	0.365072	0.979	0.776	6.33955e-11	1	oaz1a	ENSDARG00000071403	https://zfin.org/ZDB-GENE-020731-4	ornithine decarboxylase antizyme 1a [Source:ZFIN;Acc:ZDB-GENE-020731-4]
5.03319e-15	0.376815	0.85	0.416	6.99512e-11	1	si:rp71-45k5.4	ENSDARG00000035679	https://zfin.org/ZDB-GENE-060503-941	si:rp71-45k5.4 [Source:ZFIN;Acc:ZDB-GENE-060503-941]
7.38235e-15	-0.442969	0.979	0.933	1.026e-10	1	rpl17	ENSDARG00000057556	https://zfin.org/ZDB-GENE-030131-8585	ribosomal protein L17 [Source:ZFIN;Acc:ZDB-GENE-030131-8585]
1.34324e-14	-1.05617	0.114	0.413	1.86684e-10	1	cadm4	ENSDARG00000040291	https://zfin.org/ZDB-GENE-041114-138	cell adhesion molecule 4 [Source:ZFIN;Acc:ZDB-GENE-041114-138]
1.37074e-14	0.274977	0.686	0.281	1.90505e-10	1	ndufs2	ENSDARG00000007526	https://zfin.org/ZDB-GENE-050522-273	NADH dehydrogenase (ubiquinone) Fe-S protein 2 [Source:ZFIN;Acc:ZDB-GENE-050522-273]
1.48655e-14	-1.10592	0.329	0.543	2.06601e-10	1	six2b	ENSDARG00000054878	https://zfin.org/ZDB-GENE-080723-23	SIX homeobox 2b [Source:ZFIN;Acc:ZDB-GENE-080723-23]
1.72501e-14	0.252707	0.45	0.161	2.39742e-10	1	mrpl30	ENSDARG00000069850	https://zfin.org/ZDB-GENE-050522-240	mitochondrial ribosomal protein L30 [Source:ZFIN;Acc:ZDB-GENE-050522-240]
1.75083e-14	-0.406998	0.993	0.967	2.4333e-10	1	rps29	ENSDARG00000041232	https://zfin.org/ZDB-GENE-040622-5	ribosomal protein S29 [Source:ZFIN;Acc:ZDB-GENE-040622-5]
1.75109e-14	-1.15463	0.25	0.502	2.43366e-10	1	rpz5	ENSDARG00000075718	https://zfin.org/ZDB-GENE-030131-4678	rapunzel 5 [Source:ZFIN;Acc:ZDB-GENE-030131-4678]
2.3552e-14	0.259014	0.607	0.242	3.27326e-10	1	trappc5	ENSDARG00000026068	https://zfin.org/ZDB-GENE-040718-185	trafficking protein particle complex 5 [Source:ZFIN;Acc:ZDB-GENE-040718-185]
4.97735e-14	0.343284	0.8	0.378	6.91752e-10	1	psmb4	ENSDARG00000054696	https://zfin.org/ZDB-GENE-050417-333	proteasome subunit beta 4 [Source:ZFIN;Acc:ZDB-GENE-050417-333]
5.6213e-14	-0.554023	0.9	0.844	7.81248e-10	1	rpl31	ENSDARG00000053365	https://zfin.org/ZDB-GENE-060331-121	ribosomal protein L31 [Source:ZFIN;Acc:ZDB-GENE-060331-121]
6.16224e-14	-0.780775	0.65	0.682	8.56428e-10	1	ssr3	ENSDARG00000014165	https://zfin.org/ZDB-GENE-030131-9134	signal sequence receptor, gamma [Source:ZFIN;Acc:ZDB-GENE-030131-9134]
6.25518e-14	-0.975378	0.321	0.531	8.69345e-10	1	si:ch211-98n17.5	ENSDARG00000105641	https://zfin.org/ZDB-GENE-160728-87	si:ch211-98n17.5 [Source:ZFIN;Acc:ZDB-GENE-160728-87]
7.45485e-14	-0.399557	0.993	0.949	1.03607e-09	1	rps24	ENSDARG00000039347	https://zfin.org/ZDB-GENE-040109-5	ribosomal protein S24 [Source:ZFIN;Acc:ZDB-GENE-040109-5]
8.17798e-14	0.388636	0.879	0.461	1.13658e-09	1	ndufa1	ENSDARG00000036329	https://zfin.org/ZDB-GENE-040625-168	NADH dehydrogenase (ubiquinone) 1 alpha subcomplex, 1 [Source:ZFIN;Acc:ZDB-GENE-040625-168]
8.30088e-14	0.28228	0.85	0.391	1.15366e-09	1	h2afy2	ENSDARG00000087897	https://zfin.org/ZDB-GENE-050913-114	H2A histone family, member Y2 [Source:ZFIN;Acc:ZDB-GENE-050913-114]
8.55451e-14	-0.416403	0.993	0.939	1.18891e-09	1	rps27a	ENSDARG00000032725	https://zfin.org/ZDB-GENE-030131-10018	ribosomal protein S27a [Source:ZFIN;Acc:ZDB-GENE-030131-10018]
1.37542e-13	-1.22985	0.25	0.49	1.91156e-09	1	net1	ENSDARG00000032765	https://zfin.org/ZDB-GENE-041121-18	neuroepithelial cell transforming 1 [Source:ZFIN;Acc:ZDB-GENE-041121-18]
1.54957e-13	-1.03406	0.214	0.462	2.1536e-09	1	tspan35	ENSDARG00000025757	https://zfin.org/ZDB-GENE-040426-1362	tetraspanin 35 [Source:ZFIN;Acc:ZDB-GENE-040426-1362]
1.75668e-13	-1.11244	0.293	0.505	2.44144e-09	1	fam46bb	ENSDARG00000011797	https://zfin.org/ZDB-GENE-060503-431	family with sequence similarity 46, member Bb [Source:ZFIN;Acc:ZDB-GENE-060503-431]
1.91247e-13	-1.28704	0.2	0.458	2.65795e-09	1	her15.1	ENSDARG00000054562	https://zfin.org/ZDB-GENE-030707-2	hairy and enhancer of split-related 15, tandem duplicate 1 [Source:ZFIN;Acc:ZDB-GENE-030707-2]
2.02313e-13	-0.36464	1	0.951	2.81175e-09	1	faua	ENSDARG00000099022	https://zfin.org/ZDB-GENE-040426-1700	Finkel-Biskis-Reilly murine sarcoma virus (FBR-MuSV) ubiquitously expressed a [Source:ZFIN;Acc:ZDB-GENE-040426-1700]
2.922e-13	-1.06927	0.357	0.531	4.061e-09	1	pmp22a	ENSDARG00000105223	https://zfin.org/ZDB-GENE-030131-6757	peripheral myelin protein 22a [Source:ZFIN;Acc:ZDB-GENE-030131-6757]
3.56701e-13	0.254129	0.779	0.351	4.95743e-09	1	lsm6	ENSDARG00000036995	https://zfin.org/ZDB-GENE-040625-50	LSM6 homolog, U6 small nuclear RNA and mRNA degradation associated [Source:ZFIN;Acc:ZDB-GENE-040625-50]
3.57129e-13	0.305104	0.507	0.205	4.96338e-09	1	psmd3	ENSDARG00000018124	https://zfin.org/ZDB-GENE-040426-1444	proteasome 26S subunit, non-ATPase 3 [Source:ZFIN;Acc:ZDB-GENE-040426-1444]
3.62633e-13	0.373157	0.943	0.605	5.03987e-09	1	atp5f1	ENSDARG00000011553	https://zfin.org/ZDB-GENE-041010-33	ATP synthase, H+ transporting, mitochondrial Fo complex, subunit B1 [Source:ZFIN;Acc:ZDB-GENE-041010-33]
3.89457e-13	-0.42047	0.993	0.922	5.41267e-09	1	rps11	ENSDARG00000053058	https://zfin.org/ZDB-GENE-040426-2701	ribosomal protein S11 [Source:ZFIN;Acc:ZDB-GENE-040426-2701]
3.94172e-13	-0.370914	0.986	0.954	5.4782e-09	1	rpl10	ENSDARG00000025581	https://zfin.org/ZDB-GENE-030131-8656	ribosomal protein L10 [Source:ZFIN;Acc:ZDB-GENE-030131-8656]
4.20402e-13	-1.08011	0.4	0.556	5.84274e-09	1	apodb	ENSDARG00000057437	https://zfin.org/ZDB-GENE-051023-8	apolipoprotein Db [Source:ZFIN;Acc:ZDB-GENE-051023-8]
4.62757e-13	-0.472047	0.936	0.884	6.43139e-09	1	rps25	ENSDARG00000041811	https://zfin.org/ZDB-GENE-040426-1788	ribosomal protein S25 [Source:ZFIN;Acc:ZDB-GENE-040426-1788]
6.08007e-13	0.271233	0.657	0.286	8.45008e-09	1	psma6a	ENSDARG00000019398	https://zfin.org/ZDB-GENE-020326-1	proteasome subunit alpha 6a [Source:ZFIN;Acc:ZDB-GENE-020326-1]
7.49443e-13	-0.360551	1	0.974	1.04158e-08	1	rpl15	ENSDARG00000009285	https://zfin.org/ZDB-GENE-040801-183	ribosomal protein L15 [Source:ZFIN;Acc:ZDB-GENE-040801-183]
8.48346e-13	-0.857466	0.593	0.643	1.17903e-08	1	zgc:175088	ENSDARG00000099306	https://zfin.org/ZDB-GENE-080204-124	zgc:175088 [Source:ZFIN;Acc:ZDB-GENE-080204-124]
1.079e-12	-0.379847	0.971	0.942	1.49959e-08	1	rpl21	ENSDARG00000010516	https://zfin.org/ZDB-GENE-030131-8512	ribosomal protein L21 [Source:ZFIN;Acc:ZDB-GENE-030131-8512]
1.87631e-12	-0.340089	0.993	0.963	2.6077e-08	1	rps15	ENSDARG00000070849	https://zfin.org/ZDB-GENE-030131-9092	ribosomal protein S15 [Source:ZFIN;Acc:ZDB-GENE-030131-9092]
2.01825e-12	-0.427671	0.929	0.893	2.80497e-08	1	rps3	ENSDARG00000103007	https://zfin.org/ZDB-GENE-030131-8494	ribosomal protein S3 [Source:ZFIN;Acc:ZDB-GENE-030131-8494]
3.05836e-12	-0.461432	0.936	0.853	4.2505e-08	1	rps26l	ENSDARG00000030408	https://zfin.org/ZDB-GENE-040426-1706	ribosomal protein S26, like [Source:ZFIN;Acc:ZDB-GENE-040426-1706]
4.30101e-12	-0.879493	0.236	0.46	5.97755e-08	1	GCA	ENSDARG00000020187	https://zfin.org/ZDB-GENE-040930-3	zgc:92027 [Source:ZFIN;Acc:ZDB-GENE-040930-3]
6.70723e-12	-0.971106	0.286	0.486	9.3217e-08	1	tnks1bp1	ENSDARG00000068760	https://zfin.org/ZDB-GENE-050208-317	tankyrase 1 binding protein 1 [Source:ZFIN;Acc:ZDB-GENE-050208-317]
6.79895e-12	0.297528	0.893	0.452	9.44919e-08	1	dpy30	ENSDARG00000004427	https://zfin.org/ZDB-GENE-040718-136	dpy-30 histone methyltransferase complex regulatory subunit [Source:ZFIN;Acc:ZDB-GENE-040718-136]
7.01436e-12	-1.08472	0.379	0.534	9.74856e-08	1	hspa5	ENSDARG00000103846	https://zfin.org/ZDB-GENE-031001-11	heat shock protein 5 [Source:ZFIN;Acc:ZDB-GENE-031001-11]
1.27495e-11	-1.00966	0.2	0.433	1.77193e-07	1	tagln2	ENSDARG00000033466	https://zfin.org/ZDB-GENE-020802-2	transgelin 2 [Source:ZFIN;Acc:ZDB-GENE-020802-2]
1.4456e-11	-0.980889	0.236	0.451	2.0091e-07	1	fzd7b	ENSDARG00000027589	https://zfin.org/ZDB-GENE-990415-229	frizzled class receptor 7b [Source:ZFIN;Acc:ZDB-GENE-990415-229]
2.06881e-11	0.281693	0.836	0.41	2.87523e-07	1	lsm4	ENSDARG00000023852	https://zfin.org/ZDB-GENE-040426-1652	LSM4 homolog, U6 small nuclear RNA and mRNA degradation associated [Source:ZFIN;Acc:ZDB-GENE-040426-1652]
2.54613e-11	-0.318587	1	0.975	3.53861e-07	1	rpl8	ENSDARG00000014867	https://zfin.org/ZDB-GENE-040426-1670	ribosomal protein L8 [Source:ZFIN;Acc:ZDB-GENE-040426-1670]
3.45591e-11	-0.965942	0.214	0.432	4.80302e-07	1	tuba8l3	ENSDARG00000070155	https://zfin.org/ZDB-GENE-040801-77	tubulin, alpha 8 like 3 [Source:ZFIN;Acc:ZDB-GENE-040801-77]
3.88422e-11	0.267738	0.793	0.385	5.39829e-07	1	mpc2	ENSDARG00000024478	https://zfin.org/ZDB-GENE-030131-330	mitochondrial pyruvate carrier 2 [Source:ZFIN;Acc:ZDB-GENE-030131-330]
4.22312e-11	-0.432757	0.979	0.847	5.86929e-07	1	rps23	ENSDARG00000021838	https://zfin.org/ZDB-GENE-080220-50	ribosomal protein S23 [Source:ZFIN;Acc:ZDB-GENE-080220-50]
4.51818e-11	-0.872206	0.186	0.411	6.27936e-07	1	si:ch211-191a24.4	ENSDARG00000037528	https://zfin.org/ZDB-GENE-030131-4489	si:ch211-191a24.4 [Source:ZFIN;Acc:ZDB-GENE-030131-4489]
5.8436e-11	-1.08952	0.243	0.448	8.12143e-07	1	wnt2	ENSDARG00000041117	https://zfin.org/ZDB-GENE-980526-416	wingless-type MMTV integration site family member 2 [Source:ZFIN;Acc:ZDB-GENE-980526-416]
6.04706e-11	0.252777	0.729	0.347	8.4042e-07	1	naa10	ENSDARG00000071060	https://zfin.org/ZDB-GENE-040426-2648	N(alpha)-acetyltransferase 10, NatA catalytic subunit [Source:ZFIN;Acc:ZDB-GENE-040426-2648]
6.28081e-11	0.305088	0.879	0.492	8.72907e-07	1	atp5g3a	ENSDARG00000017775	https://zfin.org/ZDB-GENE-040426-857	ATP synthase, H+ transporting, mitochondrial Fo complex, subunit C3 (subunit 9), genome duplicate a [Source:ZFIN;Acc:ZDB-GENE-040426-857]
6.29661e-11	0.312627	0.779	0.402	8.75102e-07	1	aldoaa	ENSDARG00000011665	https://zfin.org/ZDB-GENE-030131-8369	aldolase a, fructose-bisphosphate, a [Source:ZFIN;Acc:ZDB-GENE-030131-8369]
7.09106e-11	-0.940092	0.121	0.358	9.85515e-07	1	ndnfl	ENSDARG00000076462	https://zfin.org/ZDB-GENE-131127-464	neuron-derived neurotrophic factor , like [Source:ZFIN;Acc:ZDB-GENE-131127-464]
7.52823e-11	-0.834738	0.271	0.468	1.04627e-06	1	SERP1	ENSDARG00000076223	https://zfin.org/ZDB-GENE-040718-312	zgc:92744 [Source:ZFIN;Acc:ZDB-GENE-040718-312]
7.6874e-11	-0.598305	0.829	0.747	1.0684e-06	1	rpl14	ENSDARG00000103433	https://zfin.org/ZDB-GENE-030131-2085	ribosomal protein L14 [Source:ZFIN;Acc:ZDB-GENE-030131-2085]
8.75071e-11	0.27331	0.786	0.408	1.21617e-06	1	cct5	ENSDARG00000045399	https://zfin.org/ZDB-GENE-030131-977	chaperonin containing TCP1, subunit 5 (epsilon) [Source:ZFIN;Acc:ZDB-GENE-030131-977]
1.15253e-10	-0.562686	0.814	0.739	1.60178e-06	1	srsf5a	ENSDARG00000029818	https://zfin.org/ZDB-GENE-030131-7336	serine/arginine-rich splicing factor 5a [Source:ZFIN;Acc:ZDB-GENE-030131-7336]
1.26762e-10	0.321459	0.95	0.604	1.76174e-06	1	pomp	ENSDARG00000032296	https://zfin.org/ZDB-GENE-040801-10	proteasome maturation protein [Source:ZFIN;Acc:ZDB-GENE-040801-10]
1.3927e-10	0.280032	0.729	0.365	1.93558e-06	1	mdh1aa	ENSDARG00000017772	https://zfin.org/ZDB-GENE-040204-1	malate dehydrogenase 1Aa, NAD (soluble) [Source:ZFIN;Acc:ZDB-GENE-040204-1]
1.66736e-10	-0.892413	0.321	0.489	2.31729e-06	1	dnajb11	ENSDARG00000015088	https://zfin.org/ZDB-GENE-031113-9	DnaJ (Hsp40) homolog, subfamily B, member 11 [Source:ZFIN;Acc:ZDB-GENE-031113-9]
1.69614e-10	-0.774729	0.414	0.539	2.3573e-06	1	npc2	ENSDARG00000090912	https://zfin.org/ZDB-GENE-021206-13	Niemann-Pick disease, type C2 [Source:ZFIN;Acc:ZDB-GENE-021206-13]
2.19586e-10	-0.783051	0.35	0.505	3.05181e-06	1	capza1a	ENSDARG00000034240	https://zfin.org/ZDB-GENE-030131-5237	capping protein (actin filament) muscle Z-line, alpha 1a [Source:ZFIN;Acc:ZDB-GENE-030131-5237]
2.39396e-10	-1.03643	0.207	0.415	3.32713e-06	1	ccnd2a	ENSDARG00000051748	https://zfin.org/ZDB-GENE-070424-30	cyclin D2, a [Source:ZFIN;Acc:ZDB-GENE-070424-30]
3.10941e-10	-0.463739	0.893	0.801	4.32146e-06	1	rpl4	ENSDARG00000041182	https://zfin.org/ZDB-GENE-030131-9034	ribosomal protein L4 [Source:ZFIN;Acc:ZDB-GENE-030131-9034]
3.2893e-10	-0.876753	0.221	0.424	4.57146e-06	1	si:dkey-7j14.6	ENSDARG00000090552	https://zfin.org/ZDB-GENE-030131-8466	si:dkey-7j14.6 [Source:ZFIN;Acc:ZDB-GENE-030131-8466]
3.58991e-10	-1.0091	0.293	0.46	4.98926e-06	1	six2a	ENSDARG00000058004	https://zfin.org/ZDB-GENE-010412-1	SIX homeobox 2a [Source:ZFIN;Acc:ZDB-GENE-010412-1]
4.77382e-10	-0.920027	0.321	0.475	6.63466e-06	1	s100v2	ENSDARG00000070702	https://zfin.org/ZDB-GENE-030131-8909	S100 calcium binding protein V2 [Source:ZFIN;Acc:ZDB-GENE-030131-8909]
5.13705e-10	-0.918513	0.336	0.485	7.13947e-06	1	calr3a	ENSDARG00000103979	https://zfin.org/ZDB-GENE-000208-17	calreticulin 3a [Source:ZFIN;Acc:ZDB-GENE-000208-17]
5.22261e-10	-0.714859	0.543	0.592	7.25838e-06	1	tmed2	ENSDARG00000026908	https://zfin.org/ZDB-GENE-030131-269	transmembrane p24 trafficking protein 2 [Source:ZFIN;Acc:ZDB-GENE-030131-269]
6.50841e-10	0.289304	0.8	0.429	9.04539e-06	1	psma4	ENSDARG00000045928	https://zfin.org/ZDB-GENE-040426-1932	proteasome subunit alpha 4 [Source:ZFIN;Acc:ZDB-GENE-040426-1932]
7.60403e-10	0.256476	0.921	0.48	1.05681e-05	1	cox5ab	ENSDARG00000099663	https://zfin.org/ZDB-GENE-030131-5162	cytochrome c oxidase subunit Vab [Source:ZFIN;Acc:ZDB-GENE-030131-5162]
8.28458e-10	-0.560826	0.829	0.75	1.15139e-05	1	eya1	ENSDARG00000014259	https://zfin.org/ZDB-GENE-990712-18	EYA transcriptional coactivator and phosphatase 1 [Source:ZFIN;Acc:ZDB-GENE-990712-18]
8.78488e-10	-0.830726	0.4	0.517	1.22092e-05	1	sdprb	ENSDARG00000071196	https://zfin.org/ZDB-GENE-040912-149	serum deprivation response b [Source:ZFIN;Acc:ZDB-GENE-040912-149]
9.03316e-10	0.258775	0.993	0.972	1.25543e-05	1	hspa8	ENSDARG00000068992	https://zfin.org/ZDB-GENE-990415-92	heat shock protein 8 [Source:ZFIN;Acc:ZDB-GENE-990415-92]
9.60432e-10	0.267903	0.957	0.583	1.33481e-05	1	skp1	ENSDARG00000003151	https://zfin.org/ZDB-GENE-040426-1707	S-phase kinase-associated protein 1 [Source:ZFIN;Acc:ZDB-GENE-040426-1707]
9.68646e-10	-0.946376	0.271	0.451	1.34622e-05	1	hsp90b1	ENSDARG00000003570	https://zfin.org/ZDB-GENE-031002-1	heat shock protein 90, beta (grp94), member 1 [Source:ZFIN;Acc:ZDB-GENE-031002-1]
9.88688e-10	-0.692817	0.6	0.612	1.37408e-05	1	tmed10	ENSDARG00000041391	https://zfin.org/ZDB-GENE-030131-4915	transmembrane p24 trafficking protein 10 [Source:ZFIN;Acc:ZDB-GENE-030131-4915]
1.40394e-09	-0.336315	0.964	0.952	1.9512e-05	1	tpt1	ENSDARG00000092693	https://zfin.org/ZDB-GENE-990603-10	tumor protein, translationally-controlled 1 [Source:ZFIN;Acc:ZDB-GENE-990603-10]
1.72205e-09	-0.840843	0.164	0.368	2.3933e-05	1	s100u	ENSDARG00000071014	https://zfin.org/ZDB-GENE-030131-3121	S100 calcium binding protein U [Source:ZFIN;Acc:ZDB-GENE-030131-3121]
1.98111e-09	-1.07352	0.307	0.466	2.75335e-05	1	prss60.2	ENSDARG00000055644	https://zfin.org/ZDB-GENE-050320-109	protease, serine, 60.2 [Source:ZFIN;Acc:ZDB-GENE-050320-109]
2.01631e-09	-1.15339	0.593	0.609	2.80226e-05	1	cxcl14	ENSDARG00000056627	https://zfin.org/ZDB-GENE-000619-1	chemokine (C-X-C motif) ligand 14 [Source:ZFIN;Acc:ZDB-GENE-000619-1]
2.08378e-09	-0.635889	0.693	0.671	2.89604e-05	1	khdrbs1a	ENSDARG00000052856	https://zfin.org/ZDB-GENE-000210-25	KH domain containing, RNA binding, signal transduction associated 1a [Source:ZFIN;Acc:ZDB-GENE-000210-25]
2.35704e-09	-0.499581	0.871	0.771	3.27581e-05	1	hmgb1a	ENSDARG00000099175	https://zfin.org/ZDB-GENE-030131-341	high mobility group box 1a [Source:ZFIN;Acc:ZDB-GENE-030131-341]
2.3731e-09	-0.666038	0.593	0.619	3.29814e-05	1	spint2	ENSDARG00000069476	https://zfin.org/ZDB-GENE-061013-323	serine peptidase inhibitor, Kunitz type, 2 [Source:ZFIN;Acc:ZDB-GENE-061013-323]
2.62848e-09	-0.315963	1	0.931	3.65306e-05	1	RPS17	ENSDARG00000046157	https://zfin.org/ZDB-GENE-050320-15	zgc:114188 [Source:ZFIN;Acc:ZDB-GENE-050320-15]
2.71143e-09	-0.984975	0.186	0.382	3.76834e-05	1	elf3	ENSDARG00000077982	https://zfin.org/ZDB-GENE-030131-8760	E74-like factor 3 (ets domain transcription factor, epithelial-specific ) [Source:ZFIN;Acc:ZDB-GENE-030131-8760]
2.94645e-09	-0.344551	0.964	0.925	4.09497e-05	1	rps5	ENSDARG00000043453	https://zfin.org/ZDB-GENE-020419-12	ribosomal protein S5 [Source:ZFIN;Acc:ZDB-GENE-020419-12]
3.17633e-09	-0.80045	0.271	0.436	4.41446e-05	1	sri	ENSDARG00000058593	https://zfin.org/ZDB-GENE-040426-1356	sorcin [Source:ZFIN;Acc:ZDB-GENE-040426-1356]
3.49549e-09	-0.826879	0.521	0.573	4.85803e-05	1	calr	ENSDARG00000076290	https://zfin.org/ZDB-GENE-030131-4042	calreticulin [Source:ZFIN;Acc:ZDB-GENE-030131-4042]
6.1373e-09	0.255422	0.807	0.425	8.52962e-05	1	psma8	ENSDARG00000010965	https://zfin.org/ZDB-GENE-040426-2194	proteasome subunit alpha 8 [Source:ZFIN;Acc:ZDB-GENE-040426-2194]
6.21574e-09	-0.800629	0.15	0.346	8.63864e-05	1	rac1a	ENSDARG00000074849	https://zfin.org/ZDB-GENE-030131-5415	ras-related C3 botulinum toxin substrate 1a (rho family, small GTP binding protein Rac1) [Source:ZFIN;Acc:ZDB-GENE-030131-5415]
6.99616e-09	-0.523401	0.843	0.721	9.72326e-05	1	hnrnpaba	ENSDARG00000007960	https://zfin.org/ZDB-GENE-030131-185	heterogeneous nuclear ribonucleoprotein A/Ba [Source:ZFIN;Acc:ZDB-GENE-030131-185]
7.52096e-09	-0.439458	0.857	0.754	0.000104526	1	serf2	ENSDARG00000074340	https://zfin.org/ZDB-GENE-041108-1	small EDRK-rich factor 2 [Source:ZFIN;Acc:ZDB-GENE-041108-1]
8.15662e-09	-0.329183	0.986	0.926	0.000113361	1	naca	ENSDARG00000005513	https://zfin.org/ZDB-GENE-020423-4	nascent polypeptide-associated complex alpha subunit [Source:ZFIN;Acc:ZDB-GENE-020423-4]
1.05446e-08	-0.971701	0.186	0.368	0.000146549	1	she	ENSDARG00000087956	https://zfin.org/ZDB-GENE-090915-6	Src homology 2 domain containing E [Source:ZFIN;Acc:ZDB-GENE-090915-6]
1.11643e-08	-1.05954	0.25	0.415	0.000155161	1	her6	ENSDARG00000006514	https://zfin.org/ZDB-GENE-980526-144	hairy-related 6 [Source:ZFIN;Acc:ZDB-GENE-980526-144]
1.1845e-08	-0.853136	0.393	0.499	0.000164622	1	ucp2	ENSDARG00000043154	https://zfin.org/ZDB-GENE-990708-8	uncoupling protein 2 [Source:ZFIN;Acc:ZDB-GENE-990708-8]
1.20165e-08	-0.796437	0.121	0.321	0.000167005	1	plcd1b	ENSDARG00000034080	https://zfin.org/ZDB-GENE-030131-9435	phospholipase C, delta 1b [Source:ZFIN;Acc:ZDB-GENE-030131-9435]
1.35459e-08	-0.868423	0.843	0.752	0.000188262	1	hmgb2b	ENSDARG00000053990	https://zfin.org/ZDB-GENE-040912-122	high mobility group box 2b [Source:ZFIN;Acc:ZDB-GENE-040912-122]
1.58528e-08	-0.775738	0.3	0.442	0.000220323	1	zgc:92313	ENSDARG00000040513	https://zfin.org/ZDB-GENE-040718-339	zgc:92313 [Source:ZFIN;Acc:ZDB-GENE-040718-339]
1.61725e-08	-0.347056	0.971	0.872	0.000224765	1	rpl22	ENSDARG00000070437	https://zfin.org/ZDB-GENE-051113-276	ribosomal protein L22 [Source:ZFIN;Acc:ZDB-GENE-051113-276]
1.89787e-08	-0.77882	0.179	0.362	0.000263766	1	wls	ENSDARG00000009534	https://zfin.org/ZDB-GENE-040426-2161	wntless Wnt ligand secretion mediator [Source:ZFIN;Acc:ZDB-GENE-040426-2161]
1.92542e-08	-0.341652	0.95	0.889	0.000267595	1	eef1b2	ENSDARG00000044521	https://zfin.org/ZDB-GENE-030131-7310	eukaryotic translation elongation factor 1 beta 2 [Source:ZFIN;Acc:ZDB-GENE-030131-7310]
1.92667e-08	-1.02252	0.207	0.379	0.000267769	1	abca12	ENSDARG00000074749	https://zfin.org/ZDB-GENE-030131-9790	ATP-binding cassette, sub-family A (ABC1), member 12 [Source:ZFIN;Acc:ZDB-GENE-030131-9790]
1.93311e-08	-0.505108	0.914	0.812	0.000268664	1	tubb4b	ENSDARG00000002344	https://zfin.org/ZDB-GENE-030131-8625	tubulin, beta 4B class IVb [Source:ZFIN;Acc:ZDB-GENE-030131-8625]
2.06388e-08	-0.699779	0.6	0.605	0.000286838	1	pfn1	ENSDARG00000088091	https://zfin.org/ZDB-GENE-031002-33	profilin 1 [Source:ZFIN;Acc:ZDB-GENE-031002-33]
2.20519e-08	-0.763793	0.279	0.434	0.000306477	1	mydgf	ENSDARG00000071679	https://zfin.org/ZDB-GENE-040718-183	myeloid-derived growth factor [Source:ZFIN;Acc:ZDB-GENE-040718-183]
2.29497e-08	-0.418736	0.871	0.794	0.000318955	1	zgc:56493	ENSDARG00000031435	https://zfin.org/ZDB-GENE-030131-8581	zgc:56493 [Source:ZFIN;Acc:ZDB-GENE-030131-8581]
2.49239e-08	-0.334703	0.993	0.911	0.000346392	1	h3f3d	ENSDARG00000045248	https://zfin.org/ZDB-GENE-050417-65	H3 histone, family 3D [Source:ZFIN;Acc:ZDB-GENE-040426-1023]
2.5922e-08	-0.532764	0.757	0.676	0.000360264	1	tegt	ENSDARG00000077934	https://zfin.org/ZDB-GENE-030826-10	testis enhanced gene transcript (BAX inhibitor 1) [Source:ZFIN;Acc:ZDB-GENE-030826-10]
2.61274e-08	-0.531708	0.764	0.702	0.000363118	1	nsa2	ENSDARG00000007708	https://zfin.org/ZDB-GENE-030131-488	NSA2 ribosome biogenesis homolog (S. cerevisiae) [Source:ZFIN;Acc:ZDB-GENE-030131-488]
2.61358e-08	-0.795029	0.079	0.275	0.000363235	1	si:ch211-161h7.5	ENSDARG00000093044	https://zfin.org/ZDB-GENE-091204-265	si:ch211-161h7.5 [Source:ZFIN;Acc:ZDB-GENE-091204-265]
3.03269e-08	-0.966121	0.343	0.467	0.000421483	1	gstm.1	ENSDARG00000042533	https://zfin.org/ZDB-GENE-030911-2	glutathione S-transferase mu, tandem duplicate 1 [Source:ZFIN;Acc:ZDB-GENE-030911-2]
3.32709e-08	-0.739676	0.064	0.259	0.000462399	1	mgst1.1	ENSDARG00000032618	https://zfin.org/ZDB-GENE-041010-30	microsomal glutathione S-transferase 1.1 [Source:ZFIN;Acc:ZDB-GENE-041010-30]
3.7736e-08	-0.725243	0.079	0.271	0.000524454	1	clic1	ENSDARG00000103340	https://zfin.org/ZDB-GENE-030131-3202	chloride intracellular channel 1 [Source:ZFIN;Acc:ZDB-GENE-030131-3202]
3.82047e-08	-0.930454	0.064	0.261	0.000530969	1	ier2	ENSDARG00000099195	https://zfin.org/ZDB-GENE-030131-9126	immediate early response 2 [Source:ZFIN;Acc:ZDB-GENE-030131-9126]
4.18178e-08	-0.546977	0.7	0.662	0.000581183	1	f11r.1	ENSDARG00000017320	https://zfin.org/ZDB-GENE-030131-2416	F11 receptor, tandem duplicate 1 [Source:ZFIN;Acc:ZDB-GENE-030131-2416]
4.19231e-08	-1.03262	0.936	0.832	0.000582647	1	hmgn2	ENSDARG00000099572	https://zfin.org/ZDB-GENE-051030-81	high mobility group nucleosomal binding domain 2 [Source:ZFIN;Acc:ZDB-GENE-051030-81]
4.22487e-08	-0.752849	0.214	0.382	0.000587172	1	tpm3	ENSDARG00000005162	https://zfin.org/ZDB-GENE-030826-16	tropomyosin 3 [Source:ZFIN;Acc:ZDB-GENE-030826-16]
4.47466e-08	-0.737047	0.529	0.545	0.000621889	1	ssr2	ENSDARG00000005230	https://zfin.org/ZDB-GENE-010413-1	signal sequence receptor, beta [Source:ZFIN;Acc:ZDB-GENE-010413-1]
4.67167e-08	-0.451991	0.95	0.811	0.000649268	1	si:ch211-196l7.4	ENSDARG00000095451	https://zfin.org/ZDB-GENE-050419-122	si:ch211-196l7.4 [Source:ZFIN;Acc:ZDB-GENE-050419-122]
2.47916e-169	1.76259	0.897	0.314	3.44554e-165	2	tfap2a	ENSDARG00000059279	https://zfin.org/ZDB-GENE-011212-6	transcription factor AP-2 alpha [Source:ZFIN;Acc:ZDB-GENE-011212-6]
1.2009e-168	1.80067	0.994	0.874	1.66901e-164	2	wu:fj16a03	ENSDARG00000100952	https://zfin.org/	wu:fj16a03 [Source:EntrezGene;Acc:335475]
8.29964e-158	1.803	0.622	0.102	1.15348e-153	2	tspan1	ENSDARG00000052027	https://zfin.org/ZDB-GENE-070502-5	tetraspanin 1 [Source:ZFIN;Acc:ZDB-GENE-070502-5]
2.8474e-137	2.10877	0.642	0.141	3.95732e-133	2	crip1	ENSDARG00000053858	https://zfin.org/ZDB-GENE-041111-1	cysteine-rich protein 1 [Source:ZFIN;Acc:ZDB-GENE-041111-1]
2.69729e-121	0.717948	1	1	3.7487e-117	2	malat1	ENSDARG00000099970	https://zfin.org/ZDB-GENE-141216-248	metastasis associated lung adenocarcinoma transcript 1 [Source:ZFIN;Acc:ZDB-GENE-141216-248]
5.71478e-106	1.4141	0.894	0.57	7.9424e-102	2	hopx	ENSDARG00000089368	https://zfin.org/ZDB-GENE-031016-2	HOP homeobox [Source:ZFIN;Acc:ZDB-GENE-031016-2]
1.48251e-99	1.24614	0.842	0.414	2.06039e-95	2	gstm.1	ENSDARG00000042533	https://zfin.org/ZDB-GENE-030911-2	glutathione S-transferase mu, tandem duplicate 1 [Source:ZFIN;Acc:ZDB-GENE-030911-2]
7.27112e-95	-2.21451	0.249	0.812	1.01054e-90	2	cbln20	ENSDARG00000087476	https://zfin.org/ZDB-GENE-111109-2	cerebellin 20 [Source:ZFIN;Acc:ZDB-GENE-111109-2]
6.7791e-86	1.41393	0.416	0.078	9.4216e-82	2	pkhd1l1	ENSDARG00000091116	https://zfin.org/ZDB-GENE-060503-475	polycystic kidney and hepatic disease 1 (autosomal recessive)-like 1 [Source:ZFIN;Acc:ZDB-GENE-060503-475]
1.21756e-85	-1.4528	0.742	0.967	1.69216e-81	2	zgc:77517	ENSDARG00000028618	https://zfin.org/ZDB-GENE-040426-1508	zgc:77517 [Source:ZFIN;Acc:ZDB-GENE-040426-1508]
1.23454e-79	1.05578	0.24	0.02	1.71576e-75	2	cldne	ENSDARG00000043128	https://zfin.org/ZDB-GENE-010328-5	claudin e [Source:ZFIN;Acc:ZDB-GENE-010328-5]
1.2264e-76	1.14268	0.34	0.054	1.70445e-72	2	tnfsf10	ENSDARG00000057241	https://zfin.org/ZDB-GENE-040718-335	tumor necrosis factor (ligand) superfamily, member 10 [Source:ZFIN;Acc:ZDB-GENE-040718-335]
7.69862e-68	1.22164	0.639	0.272	1.06995e-63	2	s100a10b	ENSDARG00000025254	https://zfin.org/ZDB-GENE-040426-1937	S100 calcium binding protein A10b [Source:ZFIN;Acc:ZDB-GENE-040426-1937]
1.67854e-63	0.508767	0.991	0.995	2.33284e-59	2	epcam	ENSDARG00000040534	https://zfin.org/ZDB-GENE-040426-2209	epithelial cell adhesion molecule [Source:ZFIN;Acc:ZDB-GENE-040426-2209]
1.11812e-61	-2.32943	0.601	0.878	1.55396e-57	2	si:dkeyp-110c7.4	ENSDARG00000100476	https://zfin.org/ZDB-GENE-070705-532	si:dkeyp-110c7.4 [Source:ZFIN;Acc:ZDB-GENE-070705-532]
1.16434e-60	-0.284014	1	0.998	1.61819e-56	2	pvalb8	ENSDARG00000037790	https://zfin.org/ZDB-GENE-030805-3	parvalbumin 8 [Source:ZFIN;Acc:ZDB-GENE-030805-3]
6.63813e-59	0.941807	0.314	0.061	9.22568e-55	2	tmem119b	ENSDARG00000068036	https://zfin.org/ZDB-GENE-070410-49	transmembrane protein 119b [Source:ZFIN;Acc:ZDB-GENE-070410-49]
2.46782e-58	-1.23702	0.182	0.663	3.42977e-54	2	CR847847.1	ENSDARG00000087096	https://zfin.org/
2.10384e-57	0.818673	0.238	0.032	2.92392e-53	2	ponzr6	ENSDARG00000036382	https://zfin.org/ZDB-GENE-081104-326	plac8 onzin related protein 6 [Source:ZFIN;Acc:ZDB-GENE-081104-326]
1.7252e-55	1.19171	0.405	0.116	2.39769e-51	2	igfbp5b	ENSDARG00000025348	https://zfin.org/ZDB-GENE-040319-2	insulin-like growth factor binding protein 5b [Source:ZFIN;Acc:ZDB-GENE-040319-2]
2.64967e-55	-1.38494	0.202	0.649	3.68252e-51	2	aqp3a	ENSDARG00000003808	https://zfin.org/ZDB-GENE-040426-2826	aquaporin 3a [Source:ZFIN;Acc:ZDB-GENE-040426-2826]
4.94482e-54	-1.77145	0.478	0.81	6.87231e-50	2	si:ch211-229d2.5	ENSDARG00000079119	https://zfin.org/ZDB-GENE-121214-200	si:ch211-229d2.5 [Source:ZFIN;Acc:ZDB-GENE-121214-200]
6.15886e-54	0.894816	0.765	0.493	8.55959e-50	2	pmp22a	ENSDARG00000105223	https://zfin.org/ZDB-GENE-030131-6757	peripheral myelin protein 22a [Source:ZFIN;Acc:ZDB-GENE-030131-6757]
1.79127e-52	0.946216	0.88	0.725	2.4895e-48	2	TMSB15A	ENSDARG00000104181	https://zfin.org/ZDB-GENE-030131-8575	si:dkey-152p16.6 [Source:ZFIN;Acc:ZDB-GENE-030131-8575]
7.63762e-49	0.885499	0.287	0.061	1.06148e-44	2	map7d3	ENSDARG00000060771	https://zfin.org/ZDB-GENE-121129-3	MAP7 domain containing 3 [Source:ZFIN;Acc:ZDB-GENE-121129-3]
9.62399e-49	0.839951	0.214	0.031	1.33754e-44	2	si:ch211-266a5.12	ENSDARG00000092714	https://zfin.org/ZDB-GENE-081104-210	si:ch211-266a5.12 [Source:ZFIN;Acc:ZDB-GENE-081104-210]
1.1223e-46	0.998102	0.437	0.154	1.55978e-42	2	mal	ENSDARG00000030094	https://zfin.org/ZDB-GENE-050417-175	mal, T-cell differentiation protein [Source:ZFIN;Acc:ZDB-GENE-050417-175]
6.01672e-46	0.65308	0.155	0.015	8.36203e-42	2	rgs4	ENSDARG00000070047	https://zfin.org/ZDB-GENE-030131-9839	regulator of G-protein signaling 4 [Source:ZFIN;Acc:ZDB-GENE-030131-9839]
1.15261e-45	-1.29883	0.117	0.538	1.60189e-41	2	slc1a3a	ENSDARG00000104431	https://zfin.org/ZDB-GENE-030131-2159	solute carrier family 1 (glial high affinity glutamate transporter), member 3a [Source:ZFIN;Acc:ZDB-GENE-030131-2159]
3.86305e-45	-1.98768	0.739	0.91	5.36886e-41	2	si:dkey-4p15.5	ENSDARG00000086272	https://zfin.org/ZDB-GENE-121214-193	si:dkey-4p15.5 [Source:ZFIN;Acc:ZDB-GENE-121214-193]
1.64064e-44	0.952737	0.572	0.267	2.28015e-40	2	zgc:154054	ENSDARG00000099923	https://zfin.org/ZDB-GENE-061103-283	zgc:154054 [Source:ZFIN;Acc:ZDB-GENE-061103-283]
8.35907e-44	0.747783	0.95	0.853	1.16174e-39	2	id1.1	ENSDARG00000096939	https://zfin.org/
1.38194e-42	0.542805	0.126	0.01	1.92062e-38	2	sfrp1a	ENSDARG00000035521	https://zfin.org/ZDB-GENE-040310-5	secreted frizzled-related protein 1a [Source:ZFIN;Acc:ZDB-GENE-040310-5]
3.32366e-41	0.878823	0.657	0.393	4.61922e-37	2	tagln2	ENSDARG00000033466	https://zfin.org/ZDB-GENE-020802-2	transgelin 2 [Source:ZFIN;Acc:ZDB-GENE-020802-2]
5.32886e-41	0.710594	0.173	0.024	7.40605e-37	2	ponzr1	ENSDARG00000090444	https://zfin.org/ZDB-GENE-070727-1	plac8 onzin related protein 1 [Source:ZFIN;Acc:ZDB-GENE-070727-1]
8.5404e-41	-0.810055	0.293	0.712	1.18695e-36	2	klf17	ENSDARG00000038792	https://zfin.org/ZDB-GENE-010129-1	Kruppel-like factor 17 [Source:ZFIN;Acc:ZDB-GENE-010129-1]
1.41903e-40	-1.05703	0.053	0.443	1.97217e-36	2	cadm4	ENSDARG00000040291	https://zfin.org/ZDB-GENE-041114-138	cell adhesion molecule 4 [Source:ZFIN;Acc:ZDB-GENE-041114-138]
5.74042e-40	-0.510945	0.921	0.988	7.97804e-36	2	rplp2l	ENSDARG00000011201	https://zfin.org/ZDB-GENE-070327-2	ribosomal protein, large P2, like [Source:ZFIN;Acc:ZDB-GENE-070327-2]
1.96986e-39	0.956247	0.375	0.128	2.73771e-35	2	sepp1a	ENSDARG00000093549	https://zfin.org/ZDB-GENE-030311-1	selenoprotein P, plasma, 1a [Source:ZFIN;Acc:ZDB-GENE-030311-1]
2.55317e-38	-1.17999	0.279	0.649	3.5484e-34	2	cxcl14	ENSDARG00000056627	https://zfin.org/ZDB-GENE-000619-1	chemokine (C-X-C motif) ligand 14 [Source:ZFIN;Acc:ZDB-GENE-000619-1]
7.38655e-38	0.631437	0.208	0.039	1.02658e-33	2	crb3b	ENSDARG00000068182	https://zfin.org/ZDB-GENE-060610-3	crumbs homolog 3b [Source:ZFIN;Acc:ZDB-GENE-060610-3]
2.06043e-37	0.677245	0.238	0.052	2.86359e-33	2	spock2	ENSDARG00000075393	https://zfin.org/ZDB-GENE-090312-170	sparc/osteonectin, cwcv and kazal-like domains proteoglycan (testican) 2 [Source:ZFIN;Acc:ZDB-GENE-090312-170]
4.24035e-37	0.627415	0.924	0.829	5.89324e-33	2	icn	ENSDARG00000009978	https://zfin.org/ZDB-GENE-030131-8599	ictacalcin [Source:ZFIN;Acc:ZDB-GENE-030131-8599]
7.30919e-37	0.734669	0.152	0.02	1.01583e-32	2	lye	ENSDARG00000100630	https://zfin.org/ZDB-GENE-120104-1	lymphocyte antigen-6, epidermis [Source:ZFIN;Acc:ZDB-GENE-120104-1]
1.23615e-36	0.687095	0.164	0.024	1.718e-32	2	sulf1	ENSDARG00000038428	https://zfin.org/ZDB-GENE-030131-9242	sulfatase 1 [Source:ZFIN;Acc:ZDB-GENE-030131-9242]
2.16717e-36	-1.20305	0.085	0.45	3.01193e-32	2	si:dkey-33m11.8	ENSDARG00000055014	https://zfin.org/ZDB-GENE-141215-49	si:dkey-33m11.8 [Source:ZFIN;Acc:ZDB-GENE-141215-49]
2.42093e-35	0.489049	0.935	0.913	3.36461e-31	2	si:dkey-222f2.1	ENSDARG00000043242	https://zfin.org/ZDB-GENE-050208-726	si:dkey-222f2.1 [Source:ZFIN;Acc:ZDB-GENE-050208-726]
3.13914e-35	-0.936144	0.073	0.438	4.36277e-31	2	vsig8a	ENSDARG00000054050	https://zfin.org/ZDB-GENE-050417-338	V-set and immunoglobulin domain containing 8a [Source:ZFIN;Acc:ZDB-GENE-050417-338]
7.59867e-35	-0.695972	0.452	0.809	1.05606e-30	2	tmsb	ENSDARG00000054911	https://zfin.org/ZDB-GENE-050307-5	thymosin, beta [Source:ZFIN;Acc:ZDB-GENE-050307-5]
1.35445e-34	0.602511	0.877	0.792	1.88242e-30	2	krt1-c5	ENSDARG00000026979	https://zfin.org/ZDB-GENE-060316-3	keratin, type 1, gene c5 [Source:ZFIN;Acc:ZDB-GENE-060316-3]
1.67615e-34	0.621573	0.173	0.03	2.32951e-30	2	mcama	ENSDARG00000089643	https://zfin.org/ZDB-GENE-090218-29	melanoma cell adhesion molecule a [Source:ZFIN;Acc:ZDB-GENE-090218-29]
2.49823e-34	-0.55422	0.842	0.973	3.47203e-30	2	si:ch211-153b23.5	ENSDARG00000058206	https://zfin.org/ZDB-GENE-030131-9744	si:ch211-153b23.5 [Source:ZFIN;Acc:ZDB-GENE-030131-9744]
8.36877e-34	0.53645	0.962	0.927	1.16309e-29	2	tmem176l.4	ENSDARG00000074390	https://zfin.org/ZDB-GENE-030131-3532	transmembrane protein 176l.4 [Source:ZFIN;Acc:ZDB-GENE-030131-3532]
1.12235e-33	-1.26295	0.129	0.477	1.55985e-29	2	tmem176l.2	ENSDARG00000089399	https://zfin.org/ZDB-GENE-080829-12	transmembrane protein 176l.2 [Source:ZFIN;Acc:ZDB-GENE-080829-12]
1.50375e-33	0.874168	0.628	0.406	2.08991e-29	2	igsf9a	ENSDARG00000075864	https://zfin.org/ZDB-GENE-060503-288	immunoglobulin superfamily, member 9a [Source:ZFIN;Acc:ZDB-GENE-060503-288]
2.16625e-33	0.618337	0.93	0.865	3.01065e-29	2	si:ch211-103f14.3	ENSDARG00000088315	https://zfin.org/ZDB-GENE-110411-160	si:ch211-103f14.3 [Source:ZFIN;Acc:ZDB-GENE-110411-160]
4.17713e-33	0.477664	0.959	0.961	5.80538e-29	2	marcksl1b	ENSDARG00000035715	https://zfin.org/ZDB-GENE-040426-2315	MARCKS-like 1b [Source:ZFIN;Acc:ZDB-GENE-040426-2315]
1.32349e-32	0.894958	0.46	0.219	1.83939e-28	2	ccl20b	ENSDARG00000094511	https://zfin.org/ZDB-GENE-091204-95	chemokine (C-C motif) ligand 20b [Source:ZFIN;Acc:ZDB-GENE-091204-95]
1.40705e-31	0.512268	0.117	0.014	1.95552e-27	2	ankrd1a	ENSDARG00000075263	https://zfin.org/ZDB-GENE-100405-1	ankyrin repeat domain 1a (cardiac muscle) [Source:ZFIN;Acc:ZDB-GENE-100405-1]
1.9052e-31	0.834831	0.378	0.152	2.64785e-27	2	epb41a	ENSDARG00000099283	https://zfin.org/ZDB-GENE-070705-81	erythrocyte membrane protein band 4.1a [Source:ZFIN;Acc:ZDB-GENE-070705-81]
4.87599e-31	-0.347656	0.997	0.997	6.77664e-27	2	rps20	ENSDARG00000036044	https://zfin.org/ZDB-GENE-040426-2284	ribosomal protein S20 [Source:ZFIN;Acc:ZDB-GENE-040426-2284]
1.2066e-30	0.835113	0.46	0.228	1.67693e-26	2	cdh1	ENSDARG00000102750	https://zfin.org/ZDB-GENE-010606-1	cadherin 1, type 1, E-cadherin (epithelial) [Source:ZFIN;Acc:ZDB-GENE-010606-1]
2.57247e-30	-0.395595	0.962	0.989	3.57522e-26	2	rpsa	ENSDARG00000019181	https://zfin.org/ZDB-GENE-040426-811	ribosomal protein SA [Source:ZFIN;Acc:ZDB-GENE-040426-811]
2.84409e-29	0.539987	0.141	0.023	3.95272e-25	2	pknox2	ENSDARG00000055349	https://zfin.org/ZDB-GENE-031118-112	pbx/knotted 1 homeobox 2 [Source:ZFIN;Acc:ZDB-GENE-031118-112]
2.53593e-28	-0.503355	0.707	0.903	3.52443e-24	2	gpx1a	ENSDARG00000018146	https://zfin.org/ZDB-GENE-030410-1	glutathione peroxidase 1a [Source:ZFIN;Acc:ZDB-GENE-030410-1]
3.64575e-28	0.82611	0.349	0.142	5.06686e-24	2	ackr3b	ENSDARG00000058179	https://zfin.org/ZDB-GENE-031116-61	atypical chemokine receptor 3b [Source:ZFIN;Acc:ZDB-GENE-031116-61]
7.44599e-28	0.711987	0.279	0.091	1.03484e-23	2	fermt1	ENSDARG00000052652	https://zfin.org/ZDB-GENE-030131-3264	fermitin family member 1 [Source:ZFIN;Acc:ZDB-GENE-030131-3264]
1.97052e-27	-0.36327	0.918	0.984	2.73862e-23	2	rpl8	ENSDARG00000014867	https://zfin.org/ZDB-GENE-040426-1670	ribosomal protein L8 [Source:ZFIN;Acc:ZDB-GENE-040426-1670]
4.68971e-27	0.582312	0.792	0.672	6.51776e-23	2	fxyd6l	ENSDARG00000097057	https://zfin.org/ZDB-GENE-071205-8	FXYD domain containing ion transport regulator 6 like [Source:ZFIN;Acc:ZDB-GENE-071205-8]
1.38768e-26	0.736249	0.578	0.382	1.9286e-22	2	prrg2	ENSDARG00000087193	https://zfin.org/ZDB-GENE-130625-1	proline rich Gla (G-carboxyglutamic acid) 2 [Source:ZFIN;Acc:ZDB-GENE-130625-1]
2.79532e-26	-0.47684	1	1	3.88493e-22	2	si:dkey-205h13.2	ENSDARG00000089429	https://zfin.org/ZDB-GENE-080225-18	si:dkey-205h13.2 [Source:ZFIN;Acc:ZDB-GENE-080225-18]
2.99085e-26	0.617805	0.158	0.033	4.15668e-22	2	tnnt2b	ENSDARG00000100694	https://zfin.org/ZDB-GENE-091106-2	troponin T type 2b (cardiac) [Source:ZFIN;Acc:ZDB-GENE-091106-2]
4.52318e-26	0.988981	0.499	0.282	6.28631e-22	2	zgc:123068	ENSDARG00000017489	https://zfin.org/ZDB-GENE-051030-98	zgc:123068 [Source:ZFIN;Acc:ZDB-GENE-051030-98]
7.81517e-26	0.639908	0.243	0.075	1.08615e-21	2	si:dkey-103g5.3	ENSDARG00000062319	https://zfin.org/ZDB-GENE-131127-337	si:dkey-103g5.3 [Source:ZFIN;Acc:ZDB-GENE-131127-337]
9.03792e-26	0.426406	0.909	0.901	1.25609e-21	2	eef1da	ENSDARG00000102291	https://zfin.org/ZDB-GENE-040426-2740	eukaryotic translation elongation factor 1 delta a (guanine nucleotide exchange protein) [Source:ZFIN;Acc:ZDB-GENE-040426-2740]
2.32388e-25	-0.636718	0.217	0.544	3.22972e-21	2	cpm	ENSDARG00000011769	https://zfin.org/ZDB-GENE-041210-191	carboxypeptidase M [Source:ZFIN;Acc:ZDB-GENE-041210-191]
3.55083e-25	-1.20956	0.126	0.417	4.93495e-21	2	mb	ENSDARG00000031952	https://zfin.org/ZDB-GENE-040426-1430	myoglobin [Source:ZFIN;Acc:ZDB-GENE-040426-1430]
3.95101e-25	1.0342	0.551	0.356	5.49112e-21	2	txn	ENSDARG00000044125	https://zfin.org/ZDB-GENE-040718-162	thioredoxin [Source:ZFIN;Acc:ZDB-GENE-040718-162]
4.67799e-25	-0.32141	0.982	0.996	6.50148e-21	2	rpl11	ENSDARG00000043509	https://zfin.org/ZDB-GENE-040625-147	ribosomal protein L11 [Source:ZFIN;Acc:ZDB-GENE-040625-147]
6.85523e-25	-0.864661	0.047	0.316	9.52739e-21	2	lfng	ENSDARG00000037879	https://zfin.org/ZDB-GENE-980605-16	LFNG O-fucosylpeptide 3-beta-N-acetylglucosaminyltransferase [Source:ZFIN;Acc:ZDB-GENE-980605-16]
1.31354e-24	0.754717	0.387	0.184	1.82556e-20	2	si:ch73-95l15.5	ENSDARG00000087596	https://zfin.org/ZDB-GENE-030131-3481	si:ch73-95l15.5 [Source:ZFIN;Acc:ZDB-GENE-030131-3481]
3.09042e-24	0.640882	0.111	0.017	4.29506e-20	2	cts12	ENSDARG00000042753	https://zfin.org/ZDB-GENE-050208-336	cathepsin 12 [Source:ZFIN;Acc:ZDB-GENE-050208-336]
5.66999e-24	-0.994565	0.255	0.551	7.88016e-20	2	si:ch211-243g18.2	ENSDARG00000044261	https://zfin.org/ZDB-GENE-030131-2830	si:ch211-243g18.2 [Source:ZFIN;Acc:ZDB-GENE-030131-2830]
6.7415e-24	0.478474	0.874	0.826	9.36934e-20	2	cldnh	ENSDARG00000069503	https://zfin.org/ZDB-GENE-010328-8	claudin h [Source:ZFIN;Acc:ZDB-GENE-010328-8]
1.35227e-23	0.720135	0.463	0.265	1.87938e-19	2	eif4ebp3	ENSDARG00000054916	https://zfin.org/ZDB-GENE-041114-44	eukaryotic translation initiation factor 4E binding protein 3 [Source:ZFIN;Acc:ZDB-GENE-041114-44]
1.49224e-23	-0.989256	0.041	0.294	2.07391e-19	2	AL954146.1	ENSDARG00000038891	https://zfin.org/
2.33048e-23	-0.706623	0.123	0.415	3.23891e-19	2	zgc:101744	ENSDARG00000038694	https://zfin.org/ZDB-GENE-050320-111	zgc:101744 [Source:ZFIN;Acc:ZDB-GENE-050320-111]
3.7502e-23	-0.602255	0.246	0.568	5.21203e-19	2	atpif1a	ENSDARG00000067975	https://zfin.org/ZDB-GENE-070410-36	ATPase inhibitory factor 1a [Source:ZFIN;Acc:ZDB-GENE-070410-36]
6.33637e-23	0.557647	0.123	0.023	8.80629e-19	2	rhbg	ENSDARG00000009018	https://zfin.org/ZDB-GENE-030131-9542	Rh family, B glycoprotein (gene/pseudogene) [Source:ZFIN;Acc:ZDB-GENE-030131-9542]
7.4517e-23	0.623531	0.642	0.459	1.03564e-18	2	net1	ENSDARG00000032765	https://zfin.org/ZDB-GENE-041121-18	neuroepithelial cell transforming 1 [Source:ZFIN;Acc:ZDB-GENE-041121-18]
1.66906e-22	-1.09646	0.229	0.513	2.31965e-18	2	zgc:55461	ENSDARG00000041723	https://zfin.org/ZDB-GENE-040426-2879	zgc:55461 [Source:ZFIN;Acc:ZDB-GENE-040426-2879]
1.73822e-22	0.62024	0.15	0.034	2.41577e-18	2	anxa2a	ENSDARG00000003216	https://zfin.org/ZDB-GENE-030131-4282	annexin A2a [Source:ZFIN;Acc:ZDB-GENE-030131-4282]
2.16068e-22	-0.674482	0.326	0.623	3.00292e-18	2	gapdhs	ENSDARG00000039914	https://zfin.org/ZDB-GENE-020913-1	glyceraldehyde-3-phosphate dehydrogenase, spermatogenic [Source:ZFIN;Acc:ZDB-GENE-020913-1]
2.4992e-22	-0.288175	0.974	0.997	3.47338e-18	2	rpl26	ENSDARG00000102317	https://zfin.org/ZDB-GENE-040426-2117	ribosomal protein L26 [Source:ZFIN;Acc:ZDB-GENE-040426-2117]
2.77561e-22	-0.70237	0.308	0.602	3.85755e-18	2	sepw2b	ENSDARG00000089936	https://zfin.org/ZDB-GENE-030428-2	selenoprotein W, 2b [Source:ZFIN;Acc:ZDB-GENE-030428-2]
4.84955e-22	0.329144	0.979	0.966	6.73991e-18	2	cldnb	ENSDARG00000009544	https://zfin.org/ZDB-GENE-010328-2	claudin b [Source:ZFIN;Acc:ZDB-GENE-010328-2]
5.02989e-22	-0.650563	0.155	0.444	6.99054e-18	2	degs1	ENSDARG00000007347	https://zfin.org/ZDB-GENE-030131-5283	delta(4)-desaturase, sphingolipid 1 [Source:ZFIN;Acc:ZDB-GENE-030131-5283]
1.18761e-21	-0.310985	0.971	0.989	1.65054e-17	2	rps12	ENSDARG00000036875	https://zfin.org/ZDB-GENE-030131-8951	ribosomal protein S12 [Source:ZFIN;Acc:ZDB-GENE-030131-8951]
1.77982e-21	-0.961047	0.062	0.309	2.47359e-17	2	zgc:165423	ENSDARG00000052905	https://zfin.org/ZDB-GENE-070720-11	zgc:165423 [Source:ZFIN;Acc:ZDB-GENE-070720-11]
4.96397e-21	-0.542321	0.49	0.768	6.89893e-17	2	cirbpa	ENSDARG00000103672	https://zfin.org/ZDB-GENE-050417-329	cold inducible RNA binding protein a [Source:ZFIN;Acc:ZDB-GENE-050417-329]
6.40076e-21	-0.612331	0.408	0.674	8.89577e-17	2	calm3b	ENSDARG00000074057	https://zfin.org/ZDB-GENE-030131-5590	calmodulin 3b (phosphorylase kinase, delta) [Source:ZFIN;Acc:ZDB-GENE-030131-527]
9.35293e-21	-0.294567	0.991	1	1.29987e-16	2	rps28	ENSDARG00000035860	https://zfin.org/ZDB-GENE-030131-2022	ribosomal protein S28 [Source:ZFIN;Acc:ZDB-GENE-030131-2022]
1.21134e-20	-0.812589	0.026	0.251	1.68352e-16	2	si:ch211-71m22.1	ENSDARG00000058638	https://zfin.org/ZDB-GENE-070705-193	si:ch211-71m22.1 [Source:ZFIN;Acc:ZDB-GENE-070705-193]
1.87759e-20	0.55004	0.686	0.593	2.60947e-16	2	ywhaz	ENSDARG00000032575	https://zfin.org/ZDB-GENE-030131-8554	tyrosine 3-monooxygenase/tryptophan 5-monooxygenase activation protein, zeta polypeptide [Source:ZFIN;Acc:ZDB-GENE-030131-8554]
5.05191e-20	-0.71897	0.012	0.224	7.02114e-16	2	prss23	ENSDARG00000055786	https://zfin.org/ZDB-GENE-030131-9149	protease, serine, 23 [Source:ZFIN;Acc:ZDB-GENE-030131-9149]
8.6413e-20	0.527453	0.167	0.047	1.20097e-15	2	kctd1	ENSDARG00000074056	https://zfin.org/ZDB-GENE-040724-194	potassium channel tetramerization domain containing 1 [Source:ZFIN;Acc:ZDB-GENE-040724-194]
1.13943e-19	0.592665	0.182	0.055	1.58358e-15	2	zgc:153317	ENSDARG00000092903	https://zfin.org/ZDB-GENE-060825-309	zgc:153317 [Source:ZFIN;Acc:ZDB-GENE-060825-309]
1.36279e-19	-0.836165	0.038	0.264	1.894e-15	2	isl1	ENSDARG00000004023	https://zfin.org/ZDB-GENE-980526-112	ISL LIM homeobox 1 [Source:ZFIN;Acc:ZDB-GENE-980526-112]
2.01303e-19	-0.260848	0.997	1	2.79771e-15	2	rplp1	ENSDARG00000021864	https://zfin.org/ZDB-GENE-030131-8663	ribosomal protein, large, P1 [Source:ZFIN;Acc:ZDB-GENE-030131-8663]
3.3298e-19	-0.55148	0.208	0.481	4.62776e-15	2	tspan35	ENSDARG00000025757	https://zfin.org/ZDB-GENE-040426-1362	tetraspanin 35 [Source:ZFIN;Acc:ZDB-GENE-040426-1362]
8.46838e-19	0.86147	0.51	0.354	1.17694e-14	2	abca12	ENSDARG00000074749	https://zfin.org/ZDB-GENE-030131-9790	ATP-binding cassette, sub-family A (ABC1), member 12 [Source:ZFIN;Acc:ZDB-GENE-030131-9790]
9.65602e-19	0.650207	0.463	0.289	1.34199e-14	2	copz2	ENSDARG00000006786	https://zfin.org/ZDB-GENE-000406-5	coatomer protein complex, subunit zeta 2 [Source:ZFIN;Acc:ZDB-GENE-000406-5]
9.8572e-19	-0.471379	0.604	0.805	1.36995e-14	2	pdia3	ENSDARG00000102640	https://zfin.org/ZDB-GENE-031002-9	protein disulfide isomerase family A, member 3 [Source:ZFIN;Acc:ZDB-GENE-031002-9]
1.04146e-18	-0.778725	0.029	0.24	1.44742e-14	2	ebf3a	ENSDARG00000100244	https://zfin.org/ZDB-GENE-070112-292	early B-cell factor 3a [Source:ZFIN;Acc:ZDB-GENE-070112-292]
1.05626e-18	0.469264	0.135	0.033	1.46799e-14	2	tnfb	ENSDARG00000013598	https://zfin.org/ZDB-GENE-050601-2	tumor necrosis factor b (TNF superfamily, member 2) [Source:ZFIN;Acc:ZDB-GENE-050601-2]
1.57271e-18	-0.55304	0.331	0.605	2.18576e-14	2	snrpe	ENSDARG00000033175	https://zfin.org/ZDB-GENE-040426-1112	small nuclear ribonucleoprotein polypeptide E [Source:ZFIN;Acc:ZDB-GENE-040426-1112]
2.47983e-18	-0.490333	0.314	0.6	3.44646e-14	2	rpl22l1	ENSDARG00000010244	https://zfin.org/ZDB-GENE-060804-3	ribosomal protein L22-like 1 [Source:ZFIN;Acc:ZDB-GENE-060804-3]
2.66203e-18	-0.481739	0.384	0.658	3.69969e-14	2	mibp2	ENSDARG00000101844	https://zfin.org/ZDB-GENE-031113-14	muscle-specific beta 1 integrin binding protein 2 [Source:ZFIN;Acc:ZDB-GENE-031113-14]
3.59127e-18	-0.443678	1	1	4.99114e-14	2	si:rp71-1c10.11	ENSDARG00000096721	https://zfin.org/ZDB-GENE-130603-61	si:rp71-1c10.11 [Source:ZFIN;Acc:ZDB-GENE-130603-61]
4.37564e-18	0.550262	0.669	0.53	6.08127e-14	2	si:ch211-39i22.1	ENSDARG00000087508	https://zfin.org/ZDB-GENE-120215-258	si:ch211-39i22.1 [Source:ZFIN;Acc:ZDB-GENE-120215-258]
4.95594e-18	-0.335409	0.845	0.937	6.88776e-14	2	rps5	ENSDARG00000043453	https://zfin.org/ZDB-GENE-020419-12	ribosomal protein S5 [Source:ZFIN;Acc:ZDB-GENE-020419-12]
5.18179e-18	-0.620918	0.035	0.244	7.20165e-14	2	fut8a	ENSDARG00000015449	https://zfin.org/ZDB-GENE-031118-20	fucosyltransferase 8a (alpha (1,6) fucosyltransferase) [Source:ZFIN;Acc:ZDB-GENE-031118-20]
5.76761e-18	0.512535	0.713	0.587	8.01582e-14	2	pabpc1b	ENSDARG00000021140	https://zfin.org/ZDB-GENE-050308-1	poly A binding protein, cytoplasmic 1 b [Source:ZFIN;Acc:ZDB-GENE-050308-1]
9.22837e-18	-0.601946	0.179	0.439	1.28256e-13	2	btbd6b	ENSDARG00000032369	https://zfin.org/ZDB-GENE-030829-65	BTB (POZ) domain containing 6b [Source:ZFIN;Acc:ZDB-GENE-030829-65]
9.89637e-18	-0.7339	0.238	0.486	1.3754e-13	2	prss60.2	ENSDARG00000055644	https://zfin.org/ZDB-GENE-050320-109	protease, serine, 60.2 [Source:ZFIN;Acc:ZDB-GENE-050320-109]
1.29669e-17	-0.476384	0.267	0.555	1.80213e-13	2	gsnb	ENSDARG00000045262	https://zfin.org/ZDB-GENE-030131-8567	gelsolin b [Source:ZFIN;Acc:ZDB-GENE-030131-8567]
1.5441e-17	-0.271927	0.979	0.989	2.14599e-13	2	rpl7a	ENSDARG00000019230	https://zfin.org/ZDB-GENE-031001-9	ribosomal protein L7a [Source:ZFIN;Acc:ZDB-GENE-031001-9]
2.26261e-17	-0.314817	0.836	0.935	3.14457e-13	2	ybx1	ENSDARG00000004757	https://zfin.org/ZDB-GENE-000629-3	Y box binding protein 1 [Source:ZFIN;Acc:ZDB-GENE-000629-3]
2.30029e-17	0.615605	0.214	0.08	3.19694e-13	2	zgc:112437	ENSDARG00000009215	https://zfin.org/ZDB-GENE-050417-293	zgc:112437 [Source:ZFIN;Acc:ZDB-GENE-050417-293]
2.52191e-17	-0.276774	0.918	0.97	3.50495e-13	2	rps15	ENSDARG00000070849	https://zfin.org/ZDB-GENE-030131-9092	ribosomal protein S15 [Source:ZFIN;Acc:ZDB-GENE-030131-9092]
2.97566e-17	-0.282009	0.897	0.962	4.13558e-13	2	ppiab	ENSDARG00000103994	https://zfin.org/ZDB-GENE-030131-7459	peptidylprolyl isomerase Ab (cyclophilin A) [Source:ZFIN;Acc:ZDB-GENE-030131-7459]
3.12149e-17	-0.447217	0.493	0.716	4.33825e-13	2	atp5b	ENSDARG00000070083	https://zfin.org/ZDB-GENE-030131-124	ATP synthase, H+ transporting, mitochondrial F1 complex, beta polypeptide [Source:ZFIN;Acc:ZDB-GENE-030131-124]
7.7667e-17	0.597908	0.358	0.191	1.07942e-12	2	ahnak	ENSDARG00000061764	https://zfin.org/ZDB-GENE-030131-8719	AHNAK nucleoprotein [Source:ZFIN;Acc:ZDB-GENE-030131-8719]
9.76016e-17	-0.392312	0.701	0.88	1.35647e-12	2	ppib	ENSDARG00000092798	https://zfin.org/ZDB-GENE-040426-1955	peptidylprolyl isomerase B (cyclophilin B) [Source:ZFIN;Acc:ZDB-GENE-040426-1955]
1.029e-16	-0.718143	0.106	0.328	1.4301e-12	2	prr15la	ENSDARG00000025615	https://zfin.org/ZDB-GENE-040801-218	proline rich 15-like a [Source:ZFIN;Acc:ZDB-GENE-040801-218]
1.41943e-16	-0.264919	0.959	0.992	1.97272e-12	2	rps2	ENSDARG00000077291	https://zfin.org/ZDB-GENE-040426-2454	ribosomal protein S2 [Source:ZFIN;Acc:ZDB-GENE-040426-2454]
1.82101e-16	0.48549	0.15	0.045	2.53084e-12	2	zgc:113162	ENSDARG00000052923	https://zfin.org/ZDB-GENE-050522-530	zgc:113162 [Source:ZFIN;Acc:ZDB-GENE-050522-530]
1.9831e-16	0.585736	0.161	0.05	2.75611e-12	2	inhbaa	ENSDARG00000012671	https://zfin.org/ZDB-GENE-000210-21	inhibin, beta Aa [Source:ZFIN;Acc:ZDB-GENE-000210-21]
2.41225e-16	-0.609928	0.018	0.2	3.35254e-12	2	atp1a1b	ENSDARG00000019856	https://zfin.org/ZDB-GENE-001212-5	ATPase, Na+/K+ transporting, alpha 1b polypeptide [Source:ZFIN;Acc:ZDB-GENE-001212-5]
2.99091e-16	-0.559857	0.047	0.246	4.15676e-12	2	mfng	ENSDARG00000042925	https://zfin.org/ZDB-GENE-041130-1	MFNG O-fucosylpeptide 3-beta-N-acetylglucosaminyltransferase [Source:ZFIN;Acc:ZDB-GENE-041130-1]
3.29005e-16	-0.265952	0.959	0.989	4.57251e-12	2	rps7	ENSDARG00000042566	https://zfin.org/ZDB-GENE-040426-1718	ribosomal protein S7 [Source:ZFIN;Acc:ZDB-GENE-040426-1718]
3.93772e-16	-0.467578	0.431	0.683	5.47265e-12	2	tma7	ENSDARG00000071670	https://zfin.org/ZDB-GENE-061027-176	translation machinery associated 7 homolog [Source:ZFIN;Acc:ZDB-GENE-061027-176]
4.14159e-16	-0.259575	0.956	0.991	5.75599e-12	2	rps8a	ENSDARG00000055996	https://zfin.org/ZDB-GENE-030131-8626	ribosomal protein S8a [Source:ZFIN;Acc:ZDB-GENE-030131-8626]
4.3729e-16	-0.410654	0.566	0.793	6.07745e-12	2	krt5	ENSDARG00000058371	https://zfin.org/ZDB-GENE-991110-23	keratin 5 [Source:ZFIN;Acc:ZDB-GENE-991110-23]
5.50357e-16	-0.529727	0.205	0.459	7.64886e-12	2	pdia6	ENSDARG00000009001	https://zfin.org/ZDB-GENE-030131-879	protein disulfide isomerase family A, member 6 [Source:ZFIN;Acc:ZDB-GENE-030131-879]
6.0562e-16	-0.533046	0.408	0.641	8.4169e-12	2	sparc	ENSDARG00000019353	https://zfin.org/ZDB-GENE-030131-9	secreted protein, acidic, cysteine-rich (osteonectin) [Source:ZFIN;Acc:ZDB-GENE-030131-9]
7.05903e-16	-0.860297	0.056	0.252	9.81064e-12	2	atoh1a	ENSDARG00000055294	https://zfin.org/ZDB-GENE-990415-17	atonal bHLH transcription factor 1a [Source:ZFIN;Acc:ZDB-GENE-990415-17]
1.11472e-15	-0.874714	0.097	0.301	1.54924e-11	2	sost	ENSDARG00000061259	https://zfin.org/ZDB-GENE-110411-139	sclerostin [Source:ZFIN;Acc:ZDB-GENE-110411-139]
1.15415e-15	-1.07332	0.135	0.344	1.60404e-11	2	si:ch73-261i21.5	ENSDARG00000105061	https://zfin.org/ZDB-GENE-110411-258	si:ch73-261i21.5 [Source:ZFIN;Acc:ZDB-GENE-110411-258]
1.20083e-15	0.59588	0.381	0.217	1.66891e-11	2	col17a1b	ENSDARG00000079011	https://zfin.org/ZDB-GENE-030131-7145	collagen, type XVII, alpha 1b [Source:ZFIN;Acc:ZDB-GENE-030131-7145]
1.56235e-15	-0.308137	0.786	0.92	2.17136e-11	2	ppiaa	ENSDARG00000009212	https://zfin.org/ZDB-GENE-030131-8556	peptidylprolyl isomerase Aa (cyclophilin A) [Source:ZFIN;Acc:ZDB-GENE-030131-8556]
2.16436e-15	-0.659396	0.408	0.639	3.00802e-11	2	h2afvb	ENSDARG00000099214	https://zfin.org/ZDB-GENE-050506-24	H2A histone family, member Vb [Source:ZFIN;Acc:ZDB-GENE-050506-24]
2.46002e-15	-0.425143	0.384	0.641	3.41894e-11	2	atp5j	ENSDARG00000014313	https://zfin.org/ZDB-GENE-040426-2534	ATP synthase, H+ transporting, mitochondrial Fo complex, subunit F6 [Source:ZFIN;Acc:ZDB-GENE-040426-2534]
2.80748e-15	-0.572698	0.522	0.735	3.90184e-11	2	si:dkey-238c7.12	ENSDARG00000095556	https://zfin.org/ZDB-GENE-030131-8330	si:dkey-238c7.12 [Source:ZFIN;Acc:ZDB-GENE-030131-8330]
2.88615e-15	-0.596326	0.062	0.256	4.01117e-11	2	her9	ENSDARG00000056438	https://zfin.org/ZDB-GENE-011213-1	hairy-related 9 [Source:ZFIN;Acc:ZDB-GENE-011213-1]
4.21789e-15	-0.371462	0.748	0.912	5.86202e-11	2	ptmaa	ENSDARG00000021113	https://zfin.org/ZDB-GENE-030131-7647	prothymosin, alpha a [Source:ZFIN;Acc:ZDB-GENE-030131-7647]
4.71376e-15	-0.399149	0.167	0.417	6.55118e-11	2	phf5a	ENSDARG00000045155	https://zfin.org/ZDB-GENE-021219-3	PHD finger protein 5A [Source:ZFIN;Acc:ZDB-GENE-021219-3]
5.24615e-15	-0.267646	0.927	0.969	7.29111e-11	2	rplp0	ENSDARG00000051783	https://zfin.org/ZDB-GENE-000629-1	ribosomal protein, large, P0 [Source:ZFIN;Acc:ZDB-GENE-000629-1]
5.28222e-15	0.513454	0.24	0.106	7.34124e-11	2	hvcn1	ENSDARG00000040338	https://zfin.org/ZDB-GENE-040718-36	hydrogen voltage-gated channel 1 [Source:ZFIN;Acc:ZDB-GENE-040718-36]
5.49642e-15	-0.505452	0.097	0.311	7.63893e-11	2	fzd8a	ENSDARG00000045444	https://zfin.org/ZDB-GENE-000328-3	frizzled class receptor 8a [Source:ZFIN;Acc:ZDB-GENE-000328-3]
5.53303e-15	0.55317	0.211	0.085	7.6898e-11	2	si:ch211-127l15.5	ENSDARG00000034943	https://zfin.org/ZDB-GENE-030131-1459	si:ch211-127l15.5 [Source:ZFIN;Acc:ZDB-GENE-030131-1459]
6.23174e-15	-0.477875	0.138	0.367	8.66087e-11	2	hspe1	ENSDARG00000056167	https://zfin.org/ZDB-GENE-000906-2	heat shock 10 protein 1 [Source:ZFIN;Acc:ZDB-GENE-000906-2]
6.99725e-15	0.636661	0.317	0.165	9.72477e-11	2	fndc7rs4	ENSDARG00000092813	https://zfin.org/ZDB-GENE-070912-648	fibronectin type III domain containing 7, related sequence 4 [Source:ZFIN;Acc:ZDB-GENE-070912-648]
7.08005e-15	-0.517047	0.088	0.296	9.83985e-11	2	bik	ENSDARG00000045549	https://zfin.org/ZDB-GENE-041210-181	BCL2-interacting killer (apoptosis-inducing) [Source:ZFIN;Acc:ZDB-GENE-041210-181]
8.45428e-15	-0.260147	0.903	0.97	1.17498e-10	2	rpl36a	ENSDARG00000058105	https://zfin.org/ZDB-GENE-020423-1	ribosomal protein L36A [Source:ZFIN;Acc:ZDB-GENE-020423-1]
1.16916e-14	0.771946	0.147	0.048	1.6249e-10	2	wnt11r	ENSDARG00000014796	https://zfin.org/ZDB-GENE-980526-249	wingless-type MMTV integration site family, member 11, related [Source:ZFIN;Acc:ZDB-GENE-980526-249]
1.18248e-14	-0.46287	0.478	0.688	1.64341e-10	2	hnrnpabb	ENSDARG00000099865	https://zfin.org/ZDB-GENE-040426-2516	heterogeneous nuclear ribonucleoprotein A/Bb [Source:ZFIN;Acc:ZDB-GENE-040426-2516]
1.67293e-14	0.589617	0.22	0.092	2.32504e-10	2	si:dkey-68o6.5	ENSDARG00000099247	https://zfin.org/ZDB-GENE-030131-5416	si:dkey-68o6.5 [Source:ZFIN;Acc:ZDB-GENE-030131-5416]
1.79729e-14	0.499992	0.147	0.048	2.49787e-10	2	stard13b	ENSDARG00000098954	https://zfin.org/ZDB-GENE-050506-146	StAR-related lipid transfer (START) domain containing 13b [Source:ZFIN;Acc:ZDB-GENE-050506-146]
1.95875e-14	-0.338807	0.604	0.803	2.72227e-10	2	cox7b	ENSDARG00000098250	https://zfin.org/ZDB-GENE-030131-6602	cytochrome c oxidase subunit VIIb [Source:ZFIN;Acc:ZDB-GENE-030131-6602]
2.53786e-14	-0.458921	0.584	0.773	3.52712e-10	2	prdx2	ENSDARG00000025350	https://zfin.org/ZDB-GENE-030326-2	peroxiredoxin 2 [Source:ZFIN;Acc:ZDB-GENE-030326-2]
2.94067e-14	-0.437337	0.34	0.577	4.08694e-10	2	atp5g1	ENSDARG00000056008	https://zfin.org/ZDB-GENE-040426-1966	ATP synthase, H+ transporting, mitochondrial Fo complex, subunit C1 (subunit 9) [Source:ZFIN;Acc:ZDB-GENE-040426-1966]
3.03332e-14	-0.268152	0.912	0.964	4.21571e-10	2	rpl27	ENSDARG00000015128	https://zfin.org/ZDB-GENE-030131-4343	ribosomal protein L27 [Source:ZFIN;Acc:ZDB-GENE-030131-4343]
3.32312e-14	-0.615945	0.384	0.613	4.61848e-10	2	nqo1	ENSDARG00000010250	https://zfin.org/ZDB-GENE-030131-1226	NAD(P)H dehydrogenase, quinone 1 [Source:ZFIN;Acc:ZDB-GENE-030131-1226]
3.69815e-14	-0.603823	0.056	0.236	5.13969e-10	2	gata2b	ENSDARG00000009094	https://zfin.org/ZDB-GENE-040718-440	GATA binding protein 2b [Source:ZFIN;Acc:ZDB-GENE-040718-440]
3.89808e-14	-0.257656	0.933	0.979	5.41756e-10	2	rps9	ENSDARG00000011405	https://zfin.org/ZDB-GENE-010724-15	ribosomal protein S9 [Source:ZFIN;Acc:ZDB-GENE-010724-15]
3.91751e-14	0.35164	0.88	0.815	5.44456e-10	2	sox21a	ENSDARG00000031664	https://zfin.org/ZDB-GENE-990715-6	SRY (sex determining region Y)-box 21a [Source:ZFIN;Acc:ZDB-GENE-990715-6]
4.02993e-14	-0.380759	0.314	0.575	5.6008e-10	2	atp5h	ENSDARG00000098355	https://zfin.org/ZDB-GENE-040426-1658	ATP synthase, H+ transporting, mitochondrial Fo complex, subunit d [Source:ZFIN;Acc:ZDB-GENE-040426-1658]
4.39086e-14	-0.728554	0.076	0.265	6.10242e-10	2	znf185	ENSDARG00000103917	https://zfin.org/ZDB-GENE-061103-355	zinc finger protein 185 (LIM domain) [Source:ZFIN;Acc:ZDB-GENE-061103-355]
4.82841e-14	-0.262142	0.891	0.961	6.71052e-10	2	faua	ENSDARG00000099022	https://zfin.org/ZDB-GENE-040426-1700	Finkel-Biskis-Reilly murine sarcoma virus (FBR-MuSV) ubiquitously expressed a [Source:ZFIN;Acc:ZDB-GENE-040426-1700]
4.83341e-14	-0.278618	0.78	0.933	6.71748e-10	2	rps26	ENSDARG00000037071	https://zfin.org/ZDB-GENE-030131-8606	ribosomal protein S26 [Source:ZFIN;Acc:ZDB-GENE-030131-8606]
6.18079e-14	-0.415201	0.117	0.331	8.59006e-10	2	ddost	ENSDARG00000037318	https://zfin.org/ZDB-GENE-040426-2147	dolichyl-diphosphooligosaccharide--protein glycosyltransferase subunit (non-catalytic) [Source:ZFIN;Acc:ZDB-GENE-040426-2147]
7.68657e-14	-0.41793	0.223	0.47	1.06828e-09	2	glod5	ENSDARG00000071871	https://zfin.org/ZDB-GENE-050522-174	glyoxalase domain containing 5 [Source:ZFIN;Acc:ZDB-GENE-050522-174]
8.54422e-14	-0.473076	0.041	0.216	1.18748e-09	2	si:ch211-137a8.4	ENSDARG00000078748	https://zfin.org/ZDB-GENE-030131-3742	si:ch211-137a8.4 [Source:ZFIN;Acc:ZDB-GENE-030131-3742]
1.01599e-13	0.509821	0.428	0.28	1.41202e-09	2	lad1	ENSDARG00000022698	https://zfin.org/ZDB-GENE-030616-268	ladinin [Source:ZFIN;Acc:ZDB-GENE-030616-268]
1.12522e-13	-0.871877	0.129	0.331	1.56383e-09	2	si:dkey-248g15.3	ENSDARG00000097959	https://zfin.org/ZDB-GENE-131127-95	si:dkey-248g15.3 [Source:ZFIN;Acc:ZDB-GENE-131127-95]
1.17969e-13	-0.304779	0.692	0.85	1.63954e-09	2	atp5g3b	ENSDARG00000009447	https://zfin.org/ZDB-GENE-020814-1	ATP synthase, H+ transporting, mitochondrial F0 complex, subunit c3 (subunit 9) b [Source:ZFIN;Acc:ZDB-GENE-020814-1]
1.19168e-13	-0.372682	0.164	0.4	1.65619e-09	2	lsm5	ENSDARG00000071573	https://zfin.org/ZDB-GENE-070822-23	LSM5 homolog, U6 small nuclear RNA and mRNA degradation associated [Source:ZFIN;Acc:ZDB-GENE-070822-23]
1.25386e-13	-0.40894	0.39	0.635	1.74261e-09	2	hnrnpa0b	ENSDARG00000036162	https://zfin.org/ZDB-GENE-030131-6154	heterogeneous nuclear ribonucleoprotein A0b [Source:ZFIN;Acc:ZDB-GENE-030131-6154]
1.25886e-13	-0.38373	0.701	0.854	1.74957e-09	2	phlda2	ENSDARG00000042874	https://zfin.org/ZDB-GENE-050522-73	pleckstrin homology-like domain, family A, member 2 [Source:ZFIN;Acc:ZDB-GENE-050522-73]
1.30074e-13	0.509191	0.155	0.055	1.80776e-09	2	rgs12a	ENSDARG00000009610	https://zfin.org/ZDB-GENE-030131-2614	regulator of G-protein signaling 12a [Source:ZFIN;Acc:ZDB-GENE-030131-2614]
1.37489e-13	-1.04529	0.097	0.284	1.91083e-09	2	stmn1a	ENSDARG00000004169	https://zfin.org/ZDB-GENE-031006-14	stathmin 1a [Source:ZFIN;Acc:ZDB-GENE-031006-14]
1.5676e-13	0.50842	0.446	0.302	2.17865e-09	2	gmfb	ENSDARG00000028327	https://zfin.org/ZDB-GENE-040426-2114	glia maturation factor, beta [Source:ZFIN;Acc:ZDB-GENE-040426-2114]
1.5749e-13	-0.335035	0.645	0.816	2.18879e-09	2	zgc:56493	ENSDARG00000031435	https://zfin.org/ZDB-GENE-030131-8581	zgc:56493 [Source:ZFIN;Acc:ZDB-GENE-030131-8581]
2.08089e-13	0.540788	0.469	0.328	2.89202e-09	2	mid1ip1a	ENSDARG00000041051	https://zfin.org/ZDB-GENE-990415-81	MID1 interacting protein 1a [Source:ZFIN;Acc:ZDB-GENE-990415-81]
2.80397e-13	-0.538907	0.038	0.204	3.89695e-09	2	si:ch211-156b7.4	ENSDARG00000101707	https://zfin.org/ZDB-GENE-141212-376	si:ch211-156b7.4 [Source:ZFIN;Acc:ZDB-GENE-141212-376]
3.22234e-13	-0.490373	0.067	0.247	4.47841e-09	2	cx35.4	ENSDARG00000042866	https://zfin.org/ZDB-GENE-050417-174	connexin 35.4 [Source:ZFIN;Acc:ZDB-GENE-050417-174]
3.29245e-13	0.305585	0.842	0.804	4.57585e-09	2	xbp1	ENSDARG00000035622	https://zfin.org/ZDB-GENE-011210-2	X-box binding protein 1 [Source:ZFIN;Acc:ZDB-GENE-011210-2]
4.0541e-13	-0.716613	0.123	0.325	5.63439e-09	2	her4.1	ENSDARG00000056732	https://zfin.org/ZDB-GENE-980526-521	hairy-related 4, tandem duplicate 1 [Source:ZFIN;Acc:ZDB-GENE-980526-521]
4.50776e-13	-0.531324	0.05	0.218	6.26488e-09	2	zgc:92630	ENSDARG00000004141	https://zfin.org/ZDB-GENE-040718-449	zgc:92630 [Source:ZFIN;Acc:ZDB-GENE-040718-449]
5.97115e-13	-0.371892	0.642	0.843	8.2987e-09	2	sepw1	ENSDARG00000035136	https://zfin.org/ZDB-GENE-030410-5	selenoprotein W, 1 [Source:ZFIN;Acc:ZDB-GENE-030410-5]
6.83097e-13	-0.339132	0.387	0.644	9.49368e-09	2	cox8a	ENSDARG00000095273	https://zfin.org/ZDB-GENE-030131-9136	cytochrome c oxidase subunit VIIIA (ubiquitous) [Source:ZFIN;Acc:ZDB-GENE-030131-9136]
9.48907e-13	-0.542072	0.038	0.198	1.31879e-08	2	dla	ENSDARG00000010791	https://zfin.org/ZDB-GENE-980526-29	deltaA [Source:ZFIN;Acc:ZDB-GENE-980526-29]
1.04491e-12	-0.45566	0.223	0.454	1.45221e-08	2	hmgb3a	ENSDARG00000056725	https://zfin.org/ZDB-GENE-050428-1	high mobility group box 3a [Source:ZFIN;Acc:ZDB-GENE-050428-1]
1.20428e-12	-0.407953	0.15	0.356	1.67371e-08	2	bmp5	ENSDARG00000101701	https://zfin.org/ZDB-GENE-040426-1413	bone morphogenetic protein 5 [Source:ZFIN;Acc:ZDB-GENE-040426-1413]
1.43626e-12	-0.553813	0.073	0.246	1.99612e-08	2	si:rp71-77l1.1	ENSDARG00000097746	https://zfin.org/ZDB-GENE-131121-141	si:rp71-77l1.1 [Source:ZFIN;Acc:ZDB-GENE-131121-141]
1.54635e-12	-0.357389	0.516	0.737	2.14912e-08	2	cfl1l	ENSDARG00000012972	https://zfin.org/ZDB-GENE-040426-2770	cofilin 1 (non-muscle), like [Source:ZFIN;Acc:ZDB-GENE-040426-2770]
1.57602e-12	-0.354683	0.472	0.71	2.19036e-08	2	dad1	ENSDARG00000102105	https://zfin.org/ZDB-GENE-060503-233	defender against cell death 1 [Source:ZFIN;Acc:ZDB-GENE-060503-233]
1.6819e-12	-0.419999	0.22	0.438	2.33751e-08	2	fabp3	ENSDARG00000023290	https://zfin.org/ZDB-GENE-020318-2	fatty acid binding protein 3, muscle and heart [Source:ZFIN;Acc:ZDB-GENE-020318-2]
1.8041e-12	-0.319933	0.619	0.815	2.50734e-08	2	atp5e	ENSDARG00000095897	https://zfin.org/ZDB-GENE-110411-22	ATP synthase, H+ transporting, mitochondrial F1 complex, epsilon subunit [Source:ZFIN;Acc:ZDB-GENE-110411-22]
2.00105e-12	0.389629	0.106	0.03	2.78105e-08	2	s100v1	ENSDARG00000070427	https://zfin.org/ZDB-GENE-080407-1	S100 calcium binding protein V1 [Source:ZFIN;Acc:ZDB-GENE-080407-1]
2.26345e-12	0.390661	0.109	0.031	3.14574e-08	2	myo18aa	ENSDARG00000075752	https://zfin.org/ZDB-GENE-080425-5	myosin XVIIIAa [Source:ZFIN;Acc:ZDB-GENE-080425-5]
2.37056e-12	0.302189	0.906	0.899	3.29461e-08	2	glulb	ENSDARG00000100003	https://zfin.org/ZDB-GENE-030131-8417	glutamate-ammonia ligase (glutamine synthase) b [Source:ZFIN;Acc:ZDB-GENE-030131-8417]
3.84781e-12	-0.575762	0.085	0.258	5.34768e-08	2	cabp2b	ENSDARG00000052277	https://zfin.org/ZDB-GENE-081028-55	calcium binding protein 2b [Source:ZFIN;Acc:ZDB-GENE-081028-55]
3.87372e-12	-0.407968	0.088	0.265	5.3837e-08	2	amer2	ENSDARG00000075222	https://zfin.org/ZDB-GENE-070719-5	APC membrane recruitment protein 2 [Source:ZFIN;Acc:ZDB-GENE-070719-5]
4.3852e-12	0.49521	0.267	0.139	6.09455e-08	2	ndrg2	ENSDARG00000011170	https://zfin.org/ZDB-GENE-041212-15	NDRG family member 2 [Source:ZFIN;Acc:ZDB-GENE-041212-15]
5.05634e-12	0.42461	0.114	0.035	7.0273e-08	2	sostdc1b	ENSDARG00000056021	https://zfin.org/ZDB-GENE-060503-653	sclerostin domain containing 1b [Source:ZFIN;Acc:ZDB-GENE-060503-653]
5.59252e-12	0.460357	0.147	0.054	7.77249e-08	2	agrn	ENSDARG00000079388	https://zfin.org/ZDB-GENE-030131-1033	agrin [Source:ZFIN;Acc:ZDB-GENE-030131-1033]
5.82413e-12	-0.254185	0.877	0.95	8.09437e-08	2	rps27a	ENSDARG00000032725	https://zfin.org/ZDB-GENE-030131-10018	ribosomal protein S27a [Source:ZFIN;Acc:ZDB-GENE-030131-10018]
6.18062e-12	0.530011	0.202	0.092	8.58983e-08	2	fam169aa	ENSDARG00000059719	https://zfin.org/ZDB-GENE-060825-117	family with sequence similarity 169, member Aa [Source:ZFIN;Acc:ZDB-GENE-060825-117]
6.75628e-12	-0.463918	0.05	0.207	9.38988e-08	2	zgc:64106	ENSDARG00000011371	https://zfin.org/ZDB-GENE-040426-1370	zgc:64106 [Source:ZFIN;Acc:ZDB-GENE-040426-1370]
6.77389e-12	0.528043	0.399	0.261	9.41436e-08	2	gbgt1l3	ENSDARG00000035555	https://zfin.org/ZDB-GENE-040912-46	globoside alpha-1,3-N-acetylgalactosaminyltransferase 1, like 3 [Source:ZFIN;Acc:ZDB-GENE-040912-46]
9.03491e-12	-0.32872	0.279	0.522	1.25567e-07	2	rbm4.3	ENSDARG00000022129	https://zfin.org/ZDB-GENE-040426-1938	RNA binding motif protein 4.3 [Source:ZFIN;Acc:ZDB-GENE-040426-1938]
9.11729e-12	-0.358893	0.111	0.303	1.26712e-07	2	pgam1a	ENSDARG00000005423	https://zfin.org/ZDB-GENE-030131-1827	phosphoglycerate mutase 1a [Source:ZFIN;Acc:ZDB-GENE-030131-1827]
1.07863e-11	0.476358	0.226	0.109	1.49908e-07	2	lnx2b	ENSDARG00000071478	https://zfin.org/ZDB-GENE-040426-2500	ligand of numb-protein X 2b [Source:ZFIN;Acc:ZDB-GENE-040426-2500]
1.11716e-11	-0.730749	0.065	0.224	1.55263e-07	2	her4.2.1	ENSDARG00000094426	https://zfin.org/ZDB-GENE-060815-1	hairy-related 4, tandem duplicate 2 [Source:ZFIN;Acc:ZDB-GENE-060815-1]
1.16694e-11	-0.553988	0.029	0.171	1.62182e-07	2	rgcc	ENSDARG00000035810	https://zfin.org/ZDB-GENE-040704-31	regulator of cell cycle [Source:ZFIN;Acc:ZDB-GENE-040704-31]
1.20859e-11	-0.707007	0.091	0.255	1.6797e-07	2	adcyap1b	ENSDARG00000027740	https://zfin.org/ZDB-GENE-041010-89	adenylate cyclase activating polypeptide 1b [Source:ZFIN;Acc:ZDB-GENE-041010-89]
1.23555e-11	-0.430767	0.375	0.595	1.71717e-07	2	calr	ENSDARG00000076290	https://zfin.org/ZDB-GENE-030131-4042	calreticulin [Source:ZFIN;Acc:ZDB-GENE-030131-4042]
1.35815e-11	-0.358613	0.191	0.405	1.88756e-07	2	mdh1aa	ENSDARG00000017772	https://zfin.org/ZDB-GENE-040204-1	malate dehydrogenase 1Aa, NAD (soluble) [Source:ZFIN;Acc:ZDB-GENE-040204-1]
1.6166e-11	-0.363064	0.666	0.835	2.24675e-07	2	tubb4b	ENSDARG00000002344	https://zfin.org/ZDB-GENE-030131-8625	tubulin, beta 4B class IVb [Source:ZFIN;Acc:ZDB-GENE-030131-8625]
1.62239e-11	-0.393532	0.196	0.404	2.2548e-07	2	sdf2l1	ENSDARG00000035631	https://zfin.org/ZDB-GENE-040808-46	stromal cell-derived factor 2-like 1 [Source:ZFIN;Acc:ZDB-GENE-040808-46]
1.92751e-11	0.434027	0.138	0.05	2.67886e-07	2	bcl11ba	ENSDARG00000062510	https://zfin.org/ZDB-GENE-061207-62	B-cell CLL/lymphoma 11Ba (zinc finger protein) [Source:ZFIN;Acc:ZDB-GENE-061207-62]
1.97202e-11	-0.396062	0.129	0.322	2.74071e-07	2	nop58	ENSDARG00000104353	https://zfin.org/ZDB-GENE-040426-2140	NOP58 ribonucleoprotein homolog (yeast) [Source:ZFIN;Acc:ZDB-GENE-040426-2140]
2.09774e-11	-0.416678	0.202	0.412	2.91543e-07	2	clta	ENSDARG00000045618	https://zfin.org/ZDB-GENE-040426-1986	clathrin, light chain A [Source:ZFIN;Acc:ZDB-GENE-040426-1986]
2.23494e-11	-0.265716	0.792	0.898	3.10612e-07	2	cox7c	ENSDARG00000104537	https://zfin.org/ZDB-GENE-030131-8062	cytochrome c oxidase, subunit VIIc [Source:ZFIN;Acc:ZDB-GENE-030131-8062]
2.42621e-11	-0.308435	0.279	0.528	3.37194e-07	2	uqcrh	ENSDARG00000059128	https://zfin.org/ZDB-GENE-051030-93	ubiquinol-cytochrome c reductase hinge protein [Source:ZFIN;Acc:ZDB-GENE-051030-93]
2.44923e-11	-0.361007	0.279	0.503	3.40394e-07	2	snrpb	ENSDARG00000011125	https://zfin.org/ZDB-GENE-040426-1819	small nuclear ribonucleoprotein polypeptides B and B1 [Source:ZFIN;Acc:ZDB-GENE-040426-1819]
2.45617e-11	-0.763414	0.07	0.227	3.41358e-07	2	glula	ENSDARG00000099776	https://zfin.org/ZDB-GENE-030131-688	glutamate-ammonia ligase (glutamine synthase) a [Source:ZFIN;Acc:ZDB-GENE-030131-688]
2.69814e-11	-0.410503	0.021	0.154	3.74988e-07	2	ptger4a	ENSDARG00000059236	https://zfin.org/ZDB-GENE-060222-1	prostaglandin E receptor 4 (subtype EP4) a [Source:ZFIN;Acc:ZDB-GENE-060222-1]
2.78468e-11	-0.371258	0.299	0.517	3.87014e-07	2	snrpd2	ENSDARG00000040440	https://zfin.org/ZDB-GENE-040914-10	small nuclear ribonucleoprotein D2 polypeptide [Source:ZFIN;Acc:ZDB-GENE-040914-10]
2.93132e-11	-0.368973	0.343	0.566	4.07395e-07	2	sub1a	ENSDARG00000053446	https://zfin.org/ZDB-GENE-050522-151	SUB1 homolog, transcriptional regulator a [Source:ZFIN;Acc:ZDB-GENE-050522-151]
3.02947e-11	-0.474106	0.091	0.255	4.21036e-07	2	npm1a	ENSDARG00000014329	https://zfin.org/ZDB-GENE-021028-1	nucleophosmin 1a (nucleolar phosphoprotein B23, numatrin) [Source:ZFIN;Acc:ZDB-GENE-021028-1]
3.1943e-11	-0.392304	0.246	0.466	4.43944e-07	2	snrpf	ENSDARG00000105037	https://zfin.org/ZDB-GENE-040930-9	small nuclear ribonucleoprotein polypeptide F [Source:ZFIN;Acc:ZDB-GENE-040930-9]
3.19449e-11	-0.686354	0.63	0.771	4.4397e-07	2	hmgb2b	ENSDARG00000053990	https://zfin.org/ZDB-GENE-040912-122	high mobility group box 2b [Source:ZFIN;Acc:ZDB-GENE-040912-122]
3.2622e-11	-0.635242	0.343	0.554	4.53381e-07	2	hmga1a	ENSDARG00000028335	https://zfin.org/ZDB-GENE-010502-1	high mobility group AT-hook 1a [Source:ZFIN;Acc:ZDB-GENE-010502-1]
3.49428e-11	-0.352284	0.296	0.531	4.85635e-07	2	atp5c1	ENSDARG00000045514	https://zfin.org/ZDB-GENE-030131-8901	ATP synthase, H+ transporting, mitochondrial F1 complex, gamma polypeptide 1 [Source:ZFIN;Acc:ZDB-GENE-030131-8901]
3.55053e-11	-0.337228	0.402	0.631	4.93453e-07	2	cfl1	ENSDARG00000021124	https://zfin.org/ZDB-GENE-030131-215	cofilin 1 [Source:ZFIN;Acc:ZDB-GENE-030131-215]
3.61182e-11	-0.38945	0.196	0.404	5.01971e-07	2	cox17	ENSDARG00000069920	https://zfin.org/ZDB-GENE-040912-91	COX17 cytochrome c oxidase copper chaperone [Source:ZFIN;Acc:ZDB-GENE-040912-91]
3.94044e-11	-0.640495	0.021	0.152	5.47642e-07	2	her4.2	ENSDARG00000056729	https://zfin.org/ZDB-GENE-060815-1	hairy-related 4, tandem duplicate 2 [Source:ZFIN;Acc:ZDB-GENE-060815-1]
3.99984e-11	-0.366191	0.287	0.502	5.55897e-07	2	uqcrq	ENSDARG00000029064	https://zfin.org/ZDB-GENE-040718-199	ubiquinol-cytochrome c reductase, complex III subunit VII [Source:ZFIN;Acc:ZDB-GENE-040718-199]
4.18604e-11	-0.361384	0.469	0.682	5.81776e-07	2	atp5j2	ENSDARG00000037867	https://zfin.org/ZDB-GENE-050309-87	ATP synthase, H+ transporting, mitochondrial Fo complex, subunit F2 [Source:ZFIN;Acc:ZDB-GENE-050309-87]
6.85924e-11	-0.360356	0.202	0.41	9.53298e-07	2	USMG5	ENSDARG00000096003	https://zfin.org/ZDB-GENE-110914-234	si:dkeyp-80c12.10 [Source:ZFIN;Acc:ZDB-GENE-110914-234]
7.40208e-11	-0.299551	0.226	0.453	1.02874e-06	2	atp5a1	ENSDARG00000010149	https://zfin.org/ZDB-GENE-060201-1	ATP synthase, H+ transporting, mitochondrial F1 complex, alpha subunit 1, cardiac muscle [Source:ZFIN;Acc:ZDB-GENE-060201-1]
7.41285e-11	-0.36401	0.106	0.282	1.03024e-06	2	marcksb	ENSDARG00000008803	https://zfin.org/ZDB-GENE-030131-1921	myristoylated alanine-rich protein kinase C substrate b [Source:ZFIN;Acc:ZDB-GENE-030131-1921]
8.46709e-11	-0.362043	0.343	0.564	1.17676e-06	2	lsm7	ENSDARG00000058328	https://zfin.org/ZDB-GENE-030131-8284	LSM7 homolog, U6 small nuclear RNA and mRNA degradation associated [Source:ZFIN;Acc:ZDB-GENE-030131-8284]
1.00378e-10	-0.349214	0.135	0.322	1.39505e-06	2	vdac1	ENSDARG00000045132	https://zfin.org/ZDB-GENE-030131-6514	voltage-dependent anion channel 1 [Source:ZFIN;Acc:ZDB-GENE-030131-6514]
1.10051e-10	-0.264728	0.346	0.599	1.52949e-06	2	eef1db	ENSDARG00000030053	https://zfin.org/ZDB-GENE-030131-6544	eukaryotic translation elongation factor 1 delta b (guanine nucleotide exchange protein) [Source:ZFIN;Acc:ZDB-GENE-030131-6544]
1.11739e-10	-0.352055	0.182	0.38	1.55295e-06	2	cct4	ENSDARG00000013475	https://zfin.org/ZDB-GENE-040426-1421	chaperonin containing TCP1, subunit 4 (delta) [Source:ZFIN;Acc:ZDB-GENE-040426-1421]
1.12437e-10	-0.34008	0.54	0.748	1.56265e-06	2	actb1	ENSDARG00000037746	https://zfin.org/ZDB-GENE-000329-1	actin, beta 1 [Source:ZFIN;Acc:ZDB-GENE-000329-1]
1.14798e-10	-0.323473	0.413	0.646	1.59547e-06	2	atp5f1	ENSDARG00000011553	https://zfin.org/ZDB-GENE-041010-33	ATP synthase, H+ transporting, mitochondrial Fo complex, subunit B1 [Source:ZFIN;Acc:ZDB-GENE-041010-33]
1.14866e-10	-0.492781	0.191	0.376	1.59641e-06	2	si:dkey-16m19.4	ENSDARG00000091937	https://zfin.org/ZDB-GENE-060503-618	si:dkey-16m19.4 [Source:ZFIN;Acc:ZDB-GENE-060503-618]
1.17623e-10	-0.364896	0.196	0.401	1.63472e-06	2	h2afva	ENSDARG00000068820	https://zfin.org/ZDB-GENE-020717-1	H2A histone family, member Va [Source:ZFIN;Acc:ZDB-GENE-020717-1]
1.25898e-10	0.51501	0.331	0.208	1.74973e-06	2	slc35b1	ENSDARG00000038213	https://zfin.org/ZDB-GENE-040912-148	solute carrier family 35, member B1 [Source:ZFIN;Acc:ZDB-GENE-040912-148]
1.52329e-10	-0.283038	0.516	0.726	2.11706e-06	2	mt-nd1	ENSDARG00000063895	https://zfin.org/ZDB-GENE-011205-7	NADH dehydrogenase 1, mitochondrial [Source:ZFIN;Acc:ZDB-GENE-011205-7]
1.64915e-10	-0.376694	0.287	0.506	2.29198e-06	2	dnajb11	ENSDARG00000015088	https://zfin.org/ZDB-GENE-031113-9	DnaJ (Hsp40) homolog, subfamily B, member 11 [Source:ZFIN;Acc:ZDB-GENE-031113-9]
1.69289e-10	-0.303121	0.581	0.777	2.35278e-06	2	rps17	ENSDARG00000104011	https://zfin.org/ZDB-GENE-040426-1852	ribosomal protein S17 [Source:ZFIN;Acc:ZDB-GENE-040426-1852]
1.81558e-10	-0.362637	0.252	0.466	2.52329e-06	2	hsp90b1	ENSDARG00000003570	https://zfin.org/ZDB-GENE-031002-1	heat shock protein 90, beta (grp94), member 1 [Source:ZFIN;Acc:ZDB-GENE-031002-1]
2.03905e-10	-0.91029	0.053	0.189	2.83387e-06	2	rbm24a	ENSDARG00000102995	https://zfin.org/ZDB-GENE-040628-1	RNA binding motif protein 24a [Source:ZFIN;Acc:ZDB-GENE-040628-1]
2.1749e-10	0.431994	0.147	0.059	3.02268e-06	2	bcl2a	ENSDARG00000094704	https://zfin.org/ZDB-GENE-051012-1	B-cell CLL/lymphoma 2a [Source:ZFIN;Acc:ZDB-GENE-051012-1]
2.38142e-10	-0.292414	0.205	0.41	3.3097e-06	2	ranbp1	ENSDARG00000014817	https://zfin.org/ZDB-GENE-040426-2548	RAN binding protein 1 [Source:ZFIN;Acc:ZDB-GENE-040426-2548]
2.41554e-10	-0.377411	0.364	0.571	3.35712e-06	2	apodb	ENSDARG00000057437	https://zfin.org/ZDB-GENE-051023-8	apolipoprotein Db [Source:ZFIN;Acc:ZDB-GENE-051023-8]
2.64516e-10	-0.351928	0.144	0.329	3.67625e-06	2	anp32b	ENSDARG00000023330	https://zfin.org/ZDB-GENE-030131-719	acidic (leucine-rich) nuclear phosphoprotein 32 family, member B [Source:ZFIN;Acc:ZDB-GENE-030131-719]
2.69698e-10	-0.333168	0.886	0.934	3.74827e-06	2	tmsb4x	ENSDARG00000077777	https://zfin.org/ZDB-GENE-030131-8304	thymosin, beta 4 x [Source:ZFIN;Acc:ZDB-GENE-030131-8304]
3.00485e-10	0.413506	0.534	0.416	4.17615e-06	2	tuba8l	ENSDARG00000042708	https://zfin.org/ZDB-GENE-030131-9167	tubulin, alpha 8 like [Source:ZFIN;Acc:ZDB-GENE-030131-9167]
3.09364e-10	0.532298	0.17	0.076	4.29954e-06	2	cyp2ad3	ENSDARG00000022650	https://zfin.org/ZDB-GENE-041001-156	cytochrome P450, family 2, subfamily AD, polypeptide 3 [Source:ZFIN;Acc:ZDB-GENE-041001-156]
3.62047e-10	-0.40737	0.012	0.128	5.03172e-06	2	si:ch73-199e17.1	ENSDARG00000094466	https://zfin.org/ZDB-GENE-100921-8	si:ch73-199e17.1 [Source:ZFIN;Acc:ZDB-GENE-100921-8]
3.69087e-10	-0.416823	0.091	0.25	5.12958e-06	2	si:dkey-225d17.2	ENSDARG00000091889	https://zfin.org/ZDB-GENE-081105-74	si:dkey-225d17.2 [Source:ZFIN;Acc:ZDB-GENE-081105-74]
3.97585e-10	-0.3267	0.126	0.302	5.52564e-06	2	sox1b	ENSDARG00000008131	https://zfin.org/ZDB-GENE-060322-5	SRY (sex determining region Y)-box 1b [Source:ZFIN;Acc:ZDB-GENE-060322-5]
4.01671e-10	-0.368615	0.006	0.115	5.58242e-06	2	cd44a	ENSDARG00000087863	https://zfin.org/ZDB-GENE-110429-1	CD44 molecule (Indian blood group) a [Source:ZFIN;Acc:ZDB-GENE-110429-1]
4.17743e-10	-0.270717	0.88	0.956	5.80579e-06	2	mt-atp6	ENSDARG00000063911	https://zfin.org/ZDB-GENE-011205-18	ATP synthase 6, mitochondrial [Source:ZFIN;Acc:ZDB-GENE-011205-18]
4.19424e-10	-0.395313	0.261	0.461	5.82916e-06	2	nop10	ENSDARG00000104227	https://zfin.org/ZDB-GENE-041007-4	NOP10 ribonucleoprotein homolog (yeast) [Source:ZFIN;Acc:ZDB-GENE-041007-4]
4.38696e-10	-0.378716	0.05	0.189	6.097e-06	2	map2k6	ENSDARG00000099184	https://zfin.org/ZDB-GENE-010202-3	mitogen-activated protein kinase kinase 6 [Source:ZFIN;Acc:ZDB-GENE-010202-3]
4.70744e-10	-0.318637	0.006	0.115	6.5424e-06	2	pllp	ENSDARG00000062756	https://zfin.org/ZDB-GENE-050419-195	plasmolipin [Source:ZFIN;Acc:ZDB-GENE-050419-195]
4.72752e-10	-0.368142	0.367	0.566	6.5703e-06	2	cox7a2a	ENSDARG00000053217	https://zfin.org/ZDB-GENE-050522-153	cytochrome c oxidase subunit VIIa polypeptide 2a (liver) [Source:ZFIN;Acc:ZDB-GENE-050522-153]
5.269e-10	-0.40741	0.079	0.229	7.32285e-06	2	nutf2l	ENSDARG00000014499	https://zfin.org/ZDB-GENE-020416-1	nuclear transport factor 2, like [Source:ZFIN;Acc:ZDB-GENE-020416-1]
5.27456e-10	-0.267159	0.51	0.73	7.33059e-06	2	eif3f	ENSDARG00000077533	https://zfin.org/ZDB-GENE-100215-2	eukaryotic translation initiation factor 3, subunit F [Source:ZFIN;Acc:ZDB-GENE-100215-2]
5.3664e-10	-0.299109	0.067	0.218	7.45822e-06	2	pa2g4a	ENSDARG00000039578	https://zfin.org/ZDB-GENE-030616-161	proliferation-associated 2G4, a [Source:ZFIN;Acc:ZDB-GENE-030616-161]
5.72103e-10	0.517276	0.258	0.146	7.95108e-06	2	si:ch211-284f22.3	ENSDARG00000097055	https://zfin.org/ZDB-GENE-060526-166	si:ch211-284f22.3 [Source:ZFIN;Acc:ZDB-GENE-060526-166]
5.88622e-10	0.46981	0.364	0.248	8.18067e-06	2	ppdpfa	ENSDARG00000007682	https://zfin.org/ZDB-GENE-030219-204	pancreatic progenitor cell differentiation and proliferation factor a [Source:ZFIN;Acc:ZDB-GENE-030219-204]
6.52027e-10	-0.384782	0.106	0.266	9.06187e-06	2	si:dkey-11f4.14	ENSDARG00000098461	https://zfin.org/ZDB-GENE-070912-355	si:dkey-11f4.14 [Source:ZFIN;Acc:ZDB-GENE-070912-355]
6.58786e-10	0.392052	0.152	0.064	9.15581e-06	2	si:ch211-141e20.2	ENSDARG00000093349	https://zfin.org/ZDB-GENE-070912-75	si:ch211-141e20.2 [Source:ZFIN;Acc:ZDB-GENE-070912-75]
7.42115e-10	0.448137	0.358	0.237	1.03139e-05	2	mgst1.1	ENSDARG00000032618	https://zfin.org/ZDB-GENE-041010-30	microsomal glutathione S-transferase 1.1 [Source:ZFIN;Acc:ZDB-GENE-041010-30]
7.74537e-10	-0.281332	0.164	0.354	1.07645e-05	2	psma2	ENSDARG00000040121	https://zfin.org/ZDB-GENE-050522-479	proteasome subunit alpha 2 [Source:ZFIN;Acc:ZDB-GENE-050522-479]
7.85164e-10	-0.355511	0.384	0.587	1.09122e-05	2	psmb7	ENSDARG00000037962	https://zfin.org/ZDB-GENE-001208-4	proteasome subunit beta 7 [Source:ZFIN;Acc:ZDB-GENE-001208-4]
8.38788e-10	-0.309153	0.243	0.448	1.16575e-05	2	cct5	ENSDARG00000045399	https://zfin.org/ZDB-GENE-030131-977	chaperonin containing TCP1, subunit 5 (epsilon) [Source:ZFIN;Acc:ZDB-GENE-030131-977]
8.52445e-10	-0.323201	0.425	0.637	1.18473e-05	2	zgc:193541	ENSDARG00000092873	https://zfin.org/ZDB-GENE-081022-15	zgc:193541 [Source:ZFIN;Acc:ZDB-GENE-081022-15]
8.98524e-10	-0.291445	0.455	0.669	1.24877e-05	2	cox6a1	ENSDARG00000022438	https://zfin.org/ZDB-GENE-030131-7715	cytochrome c oxidase subunit VIa polypeptide 1 [Source:ZFIN;Acc:ZDB-GENE-030131-7715]
9.22005e-10	-0.375942	0.094	0.251	1.2814e-05	2	eif4a1a	ENSDARG00000092115	https://zfin.org/ZDB-GENE-031030-2	eukaryotic translation initiation factor 4A1A [Source:ZFIN;Acc:ZDB-GENE-031030-2]
9.72899e-10	-0.292855	0.138	0.319	1.35214e-05	2	cct7	ENSDARG00000007385	https://zfin.org/ZDB-GENE-020419-7	chaperonin containing TCP1, subunit 7 (eta) [Source:ZFIN;Acc:ZDB-GENE-020419-7]
9.91032e-10	0.77313	0.152	0.065	1.37734e-05	2	si:dkey-247k7.2	ENSDARG00000103199	https://zfin.org/ZDB-GENE-031118-45	si:dkey-247k7.2 [Source:ZFIN;Acc:ZDB-GENE-031118-45]
1.26151e-09	0.447464	0.534	0.443	1.75324e-05	2	six2a	ENSDARG00000058004	https://zfin.org/ZDB-GENE-010412-1	SIX homeobox 2a [Source:ZFIN;Acc:ZDB-GENE-010412-1]
1.27394e-09	0.427951	0.428	0.308	1.77052e-05	2	si:ch73-347e22.8	ENSDARG00000103322	https://zfin.org/ZDB-GENE-030131-8455	si:ch73-347e22.8 [Source:ZFIN;Acc:ZDB-GENE-030131-8455]
1.29676e-09	-0.302001	0.1	0.261	1.80224e-05	2	pole4	ENSDARG00000013016	https://zfin.org/ZDB-GENE-050522-309	polymerase (DNA-directed), epsilon 4, accessory subunit [Source:ZFIN;Acc:ZDB-GENE-050522-309]
1.30238e-09	-0.319405	0.267	0.468	1.81005e-05	2	psma4	ENSDARG00000045928	https://zfin.org/ZDB-GENE-040426-1932	proteasome subunit alpha 4 [Source:ZFIN;Acc:ZDB-GENE-040426-1932]
1.35076e-09	-0.306756	0.422	0.635	1.87729e-05	2	cox6c	ENSDARG00000038577	https://zfin.org/ZDB-GENE-040724-95	cytochrome c oxidase subunit VIc [Source:ZFIN;Acc:ZDB-GENE-040724-95]
1.37843e-09	0.295166	0.83	0.816	1.91574e-05	2	si:ch211-196l7.4	ENSDARG00000095451	https://zfin.org/ZDB-GENE-050419-122	si:ch211-196l7.4 [Source:ZFIN;Acc:ZDB-GENE-050419-122]
1.4284e-09	-0.426854	0.196	0.38	1.98518e-05	2	she	ENSDARG00000087956	https://zfin.org/ZDB-GENE-090915-6	Src homology 2 domain containing E [Source:ZFIN;Acc:ZDB-GENE-090915-6]
1.56403e-09	0.407458	0.537	0.437	2.17368e-05	2	htatip2	ENSDARG00000028386	https://zfin.org/ZDB-GENE-001219-1	HIV-1 Tat interactive protein 2 [Source:ZFIN;Acc:ZDB-GENE-001219-1]
1.60092e-09	-0.356949	0.088	0.24	2.22496e-05	2	fgf10a	ENSDARG00000030932	https://zfin.org/ZDB-GENE-030715-1	fibroblast growth factor 10a [Source:ZFIN;Acc:ZDB-GENE-030715-1]
1.62096e-09	-0.281344	0.214	0.415	2.25281e-05	2	CABZ01075268.2	ENSDARG00000104674	https://zfin.org/
1.64561e-09	-0.282134	0.194	0.387	2.28707e-05	2	ndufs4	ENSDARG00000052840	https://zfin.org/ZDB-GENE-050522-421	NADH dehydrogenase (ubiquinone) Fe-S protein 4, (NADH-coenzyme Q reductase) [Source:ZFIN;Acc:ZDB-GENE-050522-421]
1.75301e-09	-0.366984	0.035	0.159	2.43634e-05	2	il15	ENSDARG00000052361	https://zfin.org/ZDB-GENE-060213-2	interleukin 15 [Source:ZFIN;Acc:ZDB-GENE-060213-2]
1.76361e-09	-0.309034	0.144	0.32	2.45106e-05	2	suclg1	ENSDARG00000052712	https://zfin.org/ZDB-GENE-040912-101	succinate-CoA ligase, alpha subunit [Source:ZFIN;Acc:ZDB-GENE-040912-101]
1.8305e-09	-0.318468	0.126	0.294	2.54403e-05	2	anxa13l	ENSDARG00000013613	https://zfin.org/ZDB-GENE-050522-310	annexin A13, like [Source:ZFIN;Acc:ZDB-GENE-050522-310]
1.90915e-09	-0.301705	0.021	0.135	2.65333e-05	2	abce1	ENSDARG00000007216	https://zfin.org/ZDB-GENE-040426-1995	ATP-binding cassette, sub-family E (OABP), member 1 [Source:ZFIN;Acc:ZDB-GENE-040426-1995]
1.91733e-09	-0.260802	0.164	0.351	2.6647e-05	2	psmc5	ENSDARG00000015315	https://zfin.org/ZDB-GENE-030131-6547	proteasome 26S subunit, ATPase 5 [Source:ZFIN;Acc:ZDB-GENE-030131-6547]
2.00719e-09	-0.657945	0.018	0.128	2.7896e-05	2	gadd45gb.1	ENSDARG00000016725	https://zfin.org/ZDB-GENE-040426-2321	growth arrest and DNA-damage-inducible, gamma b, tandem duplicate 1 [Source:ZFIN;Acc:ZDB-GENE-040426-2321]
2.0545e-09	-0.476889	0.026	0.143	2.85534e-05	2	hells	ENSDARG00000057738	https://zfin.org/ZDB-GENE-030131-9923	helicase, lymphoid-specific [Source:ZFIN;Acc:ZDB-GENE-030131-9923]
2.25753e-09	-0.296316	0.135	0.306	3.13752e-05	2	fkbp2	ENSDARG00000044540	https://zfin.org/ZDB-GENE-040912-126	FK506 binding protein 2 [Source:ZFIN;Acc:ZDB-GENE-040912-126]
2.32021e-09	-0.272576	0.361	0.583	3.22463e-05	2	atp5o	ENSDARG00000001788	https://zfin.org/ZDB-GENE-050522-147	ATP synthase, H+ transporting, mitochondrial F1 complex, O subunit [Source:ZFIN;Acc:ZDB-GENE-050522-147]
2.78791e-09	-0.547832	0.026	0.14	3.87464e-05	2	ccl19b	ENSDARG00000039351	https://zfin.org/ZDB-GENE-091204-19	chemokine (C-C motif) ligand 19b [Source:ZFIN;Acc:ZDB-GENE-091204-19]
3.00212e-09	-0.308	0.106	0.263	4.17234e-05	2	tomm6	ENSDARG00000097797	https://zfin.org/ZDB-GENE-131121-445	translocase of outer mitochondrial membrane 6 homolog (yeast) [Source:ZFIN;Acc:ZDB-GENE-131121-445]
3.0751e-09	-0.306951	0.305	0.513	4.27377e-05	2	rpz5	ENSDARG00000075718	https://zfin.org/ZDB-GENE-030131-4678	rapunzel 5 [Source:ZFIN;Acc:ZDB-GENE-030131-4678]
3.21554e-09	-0.316911	0.276	0.477	4.46896e-05	2	bzw1b	ENSDARG00000099148	https://zfin.org/ZDB-GENE-040426-2881	basic leucine zipper and W2 domains 1b [Source:ZFIN;Acc:ZDB-GENE-040426-2881]
3.41506e-09	-0.31375	0.299	0.502	4.74625e-05	2	snrpd1	ENSDARG00000011648	https://zfin.org/ZDB-GENE-020419-14	small nuclear ribonucleoprotein D1 polypeptide [Source:ZFIN;Acc:ZDB-GENE-020419-14]
3.41648e-09	0.520643	0.408	0.314	4.74822e-05	2	ywhaqa	ENSDARG00000042539	https://zfin.org/ZDB-GENE-040122-5	tyrosine 3-monooxygenase/tryptophan 5-monooxygenase activation protein, theta polypeptide a [Source:ZFIN;Acc:ZDB-GENE-040122-5]
3.52412e-09	-0.581952	0.023	0.135	4.89783e-05	2	krt92	ENSDARG00000036834	https://zfin.org/ZDB-GENE-050417-363	keratin 92 [Source:ZFIN;Acc:ZDB-GENE-050417-363]
3.6998e-09	-0.514461	0.044	0.169	5.14199e-05	2	agr2	ENSDARG00000070480	https://zfin.org/ZDB-GENE-050417-214	anterior gradient 2 [Source:ZFIN;Acc:ZDB-GENE-050417-214]
3.7993e-09	0.522138	0.232	0.127	5.28027e-05	2	ptprfa	ENSDARG00000103479	https://zfin.org/ZDB-GENE-020107-2	protein tyrosine phosphatase, receptor type, f, a [Source:ZFIN;Acc:ZDB-GENE-020107-2]
4.21466e-09	-0.295359	0.123	0.287	5.85754e-05	2	pfdn1	ENSDARG00000014536	https://zfin.org/ZDB-GENE-050306-50	prefoldin subunit 1 [Source:ZFIN;Acc:ZDB-GENE-050306-50]
4.5839e-09	-0.610279	0.032	0.147	6.3707e-05	2	fabp7a	ENSDARG00000007697	https://zfin.org/ZDB-GENE-000627-1	fatty acid binding protein 7, brain, a [Source:ZFIN;Acc:ZDB-GENE-000627-1]
4.6721e-09	-0.273737	0.381	0.596	6.49329e-05	2	cox5aa	ENSDARG00000088383	https://zfin.org/ZDB-GENE-050522-133	cytochrome c oxidase subunit Vaa [Source:ZFIN;Acc:ZDB-GENE-050522-133]
4.73617e-09	-0.278679	0.164	0.344	6.58234e-05	2	smarce1	ENSDARG00000016871	https://zfin.org/ZDB-GENE-030131-967	SWI/SNF related, matrix associated, actin dependent regulator of chromatin, subfamily e, member 1 [Source:ZFIN;Acc:ZDB-GENE-030131-967]
4.77332e-09	-0.262332	0.059	0.193	6.63397e-05	2	acp1	ENSDARG00000076486	https://zfin.org/ZDB-GENE-050327-12	acid phosphatase 1, soluble [Source:ZFIN;Acc:ZDB-GENE-050327-12]
4.82451e-09	-0.302097	0.205	0.391	6.70511e-05	2	lsm6	ENSDARG00000036995	https://zfin.org/ZDB-GENE-040625-50	LSM6 homolog, U6 small nuclear RNA and mRNA degradation associated [Source:ZFIN;Acc:ZDB-GENE-040625-50]
4.8274e-09	-0.278397	0.496	0.694	6.70912e-05	2	khdrbs1a	ENSDARG00000052856	https://zfin.org/ZDB-GENE-000210-25	KH domain containing, RNA binding, signal transduction associated 1a [Source:ZFIN;Acc:ZDB-GENE-000210-25]
5.06475e-09	-0.281608	0.293	0.509	7.03899e-05	2	snrpd3l	ENSDARG00000076283	https://zfin.org/ZDB-GENE-030131-5219	small nuclear ribonucleoprotein D3 polypeptide, like [Source:ZFIN;Acc:ZDB-GENE-030131-5219]
5.30646e-09	-0.400127	0.009	0.109	7.37492e-05	2	cxcr4a	ENSDARG00000057633	https://zfin.org/ZDB-GENE-020102-1	chemokine (C-X-C motif) receptor 4a [Source:ZFIN;Acc:ZDB-GENE-020102-1]
5.55586e-09	-0.297375	0.035	0.154	7.72153e-05	2	sf3b4	ENSDARG00000018574	https://zfin.org/ZDB-GENE-020419-22	splicing factor 3b, subunit 4 [Source:ZFIN;Acc:ZDB-GENE-020419-22]
5.60277e-09	0.416452	0.443	0.346	7.78673e-05	2	si:zfos-1011f11.1	ENSDARG00000100223	https://zfin.org/ZDB-GENE-080229-4	si:zfos-1011f11.1 [Source:ZFIN;Acc:ZDB-GENE-080229-4]
5.82831e-09	0.385192	0.188	0.093	8.10019e-05	2	serpinb1	ENSDARG00000055416	https://zfin.org/ZDB-GENE-040718-400	serpin peptidase inhibitor, clade B (ovalbumin), member 1 [Source:ZFIN;Acc:ZDB-GENE-040718-400]
5.86447e-09	0.370468	0.12	0.047	8.15044e-05	2	cdkl5	ENSDARG00000015240	https://zfin.org/ZDB-GENE-081022-110	cyclin-dependent kinase-like 5 [Source:ZFIN;Acc:ZDB-GENE-081022-110]
6.08652e-09	-0.342898	0.117	0.273	8.45904e-05	2	anp32e	ENSDARG00000054804	https://zfin.org/ZDB-GENE-040426-2448	acidic (leucine-rich) nuclear phosphoprotein 32 family, member E [Source:ZFIN;Acc:ZDB-GENE-040426-2448]
6.31552e-09	-0.270342	0.328	0.544	8.77731e-05	2	psmb1	ENSDARG00000009640	https://zfin.org/ZDB-GENE-040618-2	proteasome subunit beta 1 [Source:ZFIN;Acc:ZDB-GENE-040618-2]
6.86035e-09	-0.259565	0.114	0.276	9.53452e-05	2	si:ch211-266g18.6	ENSDARG00000003381	https://zfin.org/ZDB-GENE-131121-599	si:ch211-266g18.6 [Source:ZFIN;Acc:ZDB-GENE-131121-599]
7.36038e-09	-0.627342	0.07	0.199	0.000102294	2	pcna	ENSDARG00000054155	https://zfin.org/ZDB-GENE-000210-8	proliferating cell nuclear antigen [Source:ZFIN;Acc:ZDB-GENE-000210-8]
8.19302e-09	-0.282809	0.639	0.798	0.000113867	2	hnrnpa0l	ENSDARG00000036161	https://zfin.org/ZDB-GENE-030131-618	heterogeneous nuclear ribonucleoprotein A0, like [Source:ZFIN;Acc:ZDB-GENE-030131-618]
8.2183e-09	-0.294908	0.026	0.137	0.000114218	2	chchd10	ENSDARG00000010717	https://zfin.org/ZDB-GENE-040426-1753	coiled-coil-helix-coiled-coil-helix domain containing 10 [Source:ZFIN;Acc:ZDB-GENE-040426-1753]
8.26907e-09	-0.322766	0.059	0.188	0.000114924	2	mpped2a	ENSDARG00000006889	https://zfin.org/ZDB-GENE-050417-241	metallophosphoesterase domain containing 2a [Source:ZFIN;Acc:ZDB-GENE-050417-241]
8.46584e-09	-0.293324	0.1	0.25	0.000117658	2	dkc1	ENSDARG00000016484	https://zfin.org/ZDB-GENE-031118-120	dyskeratosis congenita 1, dyskerin [Source:ZFIN;Acc:ZDB-GENE-031118-120]
8.51376e-09	-0.368613	0.009	0.106	0.000118324	2	soul5	ENSDARG00000075015	https://zfin.org/ZDB-GENE-110718-2	heme-binding protein soul5 [Source:ZFIN;Acc:ZDB-GENE-110718-2]
8.56661e-09	-0.301323	0.009	0.107	0.000119059	2	si:dkey-225k4.1	ENSDARG00000092045	https://zfin.org/ZDB-GENE-091204-219	si:dkey-225k4.1 [Source:ZFIN;Acc:ZDB-GENE-091204-219]
8.60234e-09	-0.293882	0.27	0.472	0.000119555	2	ndufa2	ENSDARG00000021984	https://zfin.org/ZDB-GENE-050522-377	NADH dehydrogenase (ubiquinone) 1 alpha subcomplex, 2 [Source:ZFIN;Acc:ZDB-GENE-050522-377]
9.17001e-09	-0.28898	0.088	0.233	0.000127445	2	sub1b	ENSDARG00000007720	https://zfin.org/ZDB-GENE-040718-209	SUB1 homolog, transcriptional regulator b [Source:ZFIN;Acc:ZDB-GENE-040718-209]
9.25242e-09	-0.272506	0.161	0.334	0.00012859	2	psmc4	ENSDARG00000027099	https://zfin.org/ZDB-GENE-030131-5083	proteasome 26S subunit, ATPase 4 [Source:ZFIN;Acc:ZDB-GENE-030131-5083]
9.47999e-09	-0.297318	0.789	0.896	0.000131753	2	si:ch211-195b11.3	ENSDARG00000100582	https://zfin.org/ZDB-GENE-141222-6	si:ch211-195b11.3 [Source:ZFIN;Acc:ZDB-GENE-141222-6]
9.77485e-09	-0.292648	0.566	0.742	0.000135851	2	ssr4	ENSDARG00000019444	https://zfin.org/ZDB-GENE-030131-4900	signal sequence receptor, delta [Source:ZFIN;Acc:ZDB-GENE-030131-4900]
1.01205e-08	-0.30297	0.472	0.659	0.000140654	2	ran	ENSDARG00000057026	https://zfin.org/ZDB-GENE-990415-88	RAN, member RAS oncogene family [Source:ZFIN;Acc:ZDB-GENE-990415-88]
1.03996e-08	-0.280149	0.106	0.256	0.000144533	2	tmem165	ENSDARG00000034600	https://zfin.org/ZDB-GENE-030131-3222	transmembrane protein 165 [Source:ZFIN;Acc:ZDB-GENE-030131-3222]
1.04063e-08	-0.302783	0.402	0.597	0.000144627	2	sumo3a	ENSDARG00000028119	https://zfin.org/ZDB-GENE-040426-2133	small ubiquitin-like modifier 3a [Source:ZFIN;Acc:ZDB-GENE-040426-2133]
1.08738e-08	-0.302399	0.056	0.182	0.000151124	2	rrs1	ENSDARG00000003941	https://zfin.org/ZDB-GENE-030131-9345	RRS1 ribosome biogenesis regulator homolog (S. cerevisiae) [Source:ZFIN;Acc:ZDB-GENE-030131-9345]
1.13334e-08	-0.308484	0.056	0.182	0.000157512	2	g3bp1	ENSDARG00000017741	https://zfin.org/ZDB-GENE-030131-7452	GTPase activating protein (SH3 domain) binding protein 1 [Source:ZFIN;Acc:ZDB-GENE-030131-7452]
1.15904e-08	-0.268501	0.138	0.306	0.000161083	2	trmt112	ENSDARG00000071878	https://zfin.org/ZDB-GENE-050522-30	tRNA methyltransferase 11-2 homolog (S. cerevisiae) [Source:ZFIN;Acc:ZDB-GENE-050522-30]
1.24526e-08	0.423292	0.399	0.292	0.000173066	2	cd63	ENSDARG00000025147	https://zfin.org/ZDB-GENE-030131-180	CD63 molecule [Source:ZFIN;Acc:ZDB-GENE-030131-180]
1.35172e-08	-0.326696	0.37	0.572	0.000187862	2	seta	ENSDARG00000031495	https://zfin.org/ZDB-GENE-030131-2221	SET translocation (myeloid leukemia-associated) A [Source:ZFIN;Acc:ZDB-GENE-030131-2221]
1.37031e-08	-0.304413	0.232	0.423	0.000190446	2	hypk	ENSDARG00000059725	https://zfin.org/ZDB-GENE-080515-6	huntingtin interacting protein K [Source:ZFIN;Acc:ZDB-GENE-080515-6]
1.4494e-08	0.465639	0.243	0.142	0.000201438	2	susd6	ENSDARG00000030116	https://zfin.org/ZDB-GENE-030131-8832	sushi domain containing 6 [Source:ZFIN;Acc:ZDB-GENE-030131-8832]
1.48568e-08	-0.335015	0.082	0.218	0.00020648	2	stox1	ENSDARG00000062593	https://zfin.org/ZDB-GENE-030925-2	storkhead box 1 [Source:ZFIN;Acc:ZDB-GENE-030925-2]
1.49937e-08	-0.344441	0.082	0.218	0.000208382	2	sox11b	ENSDARG00000095743	https://zfin.org/ZDB-GENE-980526-466	SRY (sex determining region Y)-box 11b [Source:ZFIN;Acc:ZDB-GENE-980526-466]
1.50205e-08	-0.302046	0.408	0.618	0.000208754	2	ap2m1a	ENSDARG00000002790	https://zfin.org/ZDB-GENE-030131-9784	adaptor-related protein complex 2, mu 1 subunit, a [Source:ZFIN;Acc:ZDB-GENE-030131-9784]
1.52722e-08	-0.265894	0.123	0.28	0.000212253	2	hnrnph1l	ENSDARG00000005551	https://zfin.org/ZDB-GENE-030131-275	heterogeneous nuclear ribonucleoprotein H1, like [Source:ZFIN;Acc:ZDB-GENE-030131-275]
1.54389e-08	-0.268579	0.135	0.299	0.00021457	2	psmd14	ENSDARG00000063100	https://zfin.org/ZDB-GENE-070410-56	proteasome 26S subunit, non-ATPase 14 [Source:ZFIN;Acc:ZDB-GENE-070410-56]
1.55026e-08	-0.325501	0.032	0.145	0.000215456	2	wnt11	ENSDARG00000004256	https://zfin.org/ZDB-GENE-990603-12	wingless-type MMTV integration site family, member 11 [Source:ZFIN;Acc:ZDB-GENE-990603-12]
1.55601e-08	0.298861	0.739	0.718	0.000216254	2	cldn7b	ENSDARG00000014047	https://zfin.org/ZDB-GENE-001103-5	claudin 7b [Source:ZFIN;Acc:ZDB-GENE-001103-5]
1.63363e-08	-0.26613	0.097	0.242	0.000227042	2	slirp	ENSDARG00000097753	https://zfin.org/ZDB-GENE-030729-30	SRA stem-loop interacting RNA binding protein [Source:ZFIN;Acc:ZDB-GENE-030729-30]
1.64287e-08	-0.266167	0.129	0.289	0.000228325	2	prdx3	ENSDARG00000032102	https://zfin.org/ZDB-GENE-030826-18	peroxiredoxin 3 [Source:ZFIN;Acc:ZDB-GENE-030826-18]
1.65403e-08	-0.277047	0.214	0.395	0.000229877	2	adh5	ENSDARG00000080010	https://zfin.org/ZDB-GENE-011003-1	alcohol dehydrogenase 5 [Source:ZFIN;Acc:ZDB-GENE-011003-1]
1.67102e-08	0.373586	0.111	0.043	0.000232238	2	shisa3	ENSDARG00000075467	https://zfin.org/ZDB-GENE-070112-2022	shisa family member 3 [Source:ZFIN;Acc:ZDB-GENE-070112-2022]
1.70954e-08	-0.341435	0.15	0.311	0.000237592	2	mycbp	ENSDARG00000091001	https://zfin.org/ZDB-GENE-060331-97	c-myc binding protein [Source:ZFIN;Acc:ZDB-GENE-060331-97]
1.71708e-08	-0.301478	0.15	0.311	0.000238639	2	sf3b5	ENSDARG00000016855	https://zfin.org/ZDB-GENE-040718-181	splicing factor 3b, subunit 5 [Source:ZFIN;Acc:ZDB-GENE-040718-181]
1.73059e-08	-0.307361	0.188	0.359	0.000240518	2	tomm20a	ENSDARG00000090656	https://zfin.org/ZDB-GENE-040426-1976	translocase of outer mitochondrial membrane 20 [Source:ZFIN;Acc:ZDB-GENE-040426-1976]
1.83048e-08	-0.281332	0.053	0.178	0.0002544	2	aimp1	ENSDARG00000060036	https://zfin.org/ZDB-GENE-060825-144	aminoacyl tRNA synthetase complex-interacting multifunctional protein 1 [Source:ZFIN;Acc:ZDB-GENE-060825-144]
1.84411e-08	0.340728	0.106	0.039	0.000256294	2	soga1	ENSDARG00000063075	https://zfin.org/ZDB-GENE-090313-188	suppressor of glucose, autophagy associated 1 [Source:ZFIN;Acc:ZDB-GENE-090313-188]
1.93323e-08	-0.424013	0.07	0.198	0.00026868	2	rpa3	ENSDARG00000002613	https://zfin.org/ZDB-GENE-040426-977	replication protein A3 [Source:ZFIN;Acc:ZDB-GENE-040426-977]
1.96163e-08	-0.375994	0.126	0.276	0.000272627	2	cd109	ENSDARG00000060609	https://zfin.org/ZDB-GENE-120215-253	CD109 molecule [Source:ZFIN;Acc:ZDB-GENE-120215-253]
2.03915e-08	0.370315	0.111	0.043	0.0002834	2	sh3d21	ENSDARG00000099448	https://zfin.org/ZDB-GENE-051120-57	SH3 domain containing 21 [Source:ZFIN;Acc:ZDB-GENE-051120-57]
2.1357e-08	0.472176	0.152	0.072	0.00029682	2	hpca	ENSDARG00000018397	https://zfin.org/ZDB-GENE-040426-1683	hippocalcin [Source:ZFIN;Acc:ZDB-GENE-040426-1683]
2.14558e-08	-0.282878	0.164	0.329	0.000298193	2	prmt1	ENSDARG00000010246	https://zfin.org/ZDB-GENE-030131-693	protein arginine methyltransferase 1 [Source:ZFIN;Acc:ZDB-GENE-030131-693]
2.18407e-08	-0.44951	0.229	0.38	0.000303541	2	krt18	ENSDARG00000018404	https://zfin.org/ZDB-GENE-030411-6	keratin 18 [Source:ZFIN;Acc:ZDB-GENE-030411-6]
2.26443e-08	-0.422575	0.023	0.125	0.00031471	2	sncb	ENSDARG00000104945	https://zfin.org/ZDB-GENE-040426-1615	synuclein, beta [Source:ZFIN;Acc:ZDB-GENE-040426-1615]
2.38095e-08	0.341792	0.111	0.044	0.000330905	2	zdhhc16b	ENSDARG00000015989	https://zfin.org/ZDB-GENE-040426-1301	zinc finger, DHHC-type containing 16b [Source:ZFIN;Acc:ZDB-GENE-040426-1301]
2.6181e-08	-0.280405	0.396	0.605	0.000363863	2	psma3	ENSDARG00000086618	https://zfin.org/ZDB-GENE-050913-120	proteasome subunit alpha 3 [Source:ZFIN;Acc:ZDB-GENE-050913-120]
2.64606e-08	0.338018	0.152	0.07	0.00036775	2	dhx32b	ENSDARG00000079029	https://zfin.org/ZDB-GENE-130613-5	DEAH (Asp-Glu-Ala-His) box polypeptide 32b [Source:ZFIN;Acc:ZDB-GENE-130613-5]
2.67585e-08	-0.312278	0.015	0.111	0.000371889	2	tmem45a	ENSDARG00000070743	https://zfin.org/ZDB-GENE-050522-34	transmembrane protein 45a [Source:ZFIN;Acc:ZDB-GENE-050522-34]
2.69709e-08	-0.266098	0.041	0.158	0.000374842	2	dachb	ENSDARG00000034785	https://zfin.org/ZDB-GENE-020402-4	dachshund b [Source:ZFIN;Acc:ZDB-GENE-020402-4]
2.71293e-08	-0.336555	0.37	0.551	0.000377043	2	setb	ENSDARG00000003920	https://zfin.org/ZDB-GENE-030131-433	SET translocation (myeloid leukemia-associated) B [Source:ZFIN;Acc:ZDB-GENE-030131-433]
2.9802e-08	-0.294708	0.062	0.187	0.000414188	2	si:ch211-217k17.7	ENSDARG00000059908	https://zfin.org/ZDB-GENE-061009-11	si:ch211-217k17.7 [Source:ZFIN;Acc:ZDB-GENE-061009-11]
3.09862e-08	-0.266314	0.021	0.122	0.000430646	2	prr15lb	ENSDARG00000029308	https://zfin.org/ZDB-GENE-050417-201	proline rich 15-like b [Source:ZFIN;Acc:ZDB-GENE-050417-201]
3.32061e-08	-0.26141	0.24	0.425	0.000461498	2	polr2l	ENSDARG00000058349	https://zfin.org/ZDB-GENE-050522-181	polymerase (RNA) II (DNA directed) polypeptide L [Source:ZFIN;Acc:ZDB-GENE-050522-181]
3.39956e-08	0.50474	0.378	0.283	0.00047247	2	pycard	ENSDARG00000040076	https://zfin.org/ZDB-GENE-000511-2	PYD and CARD domain containing [Source:ZFIN;Acc:ZDB-GENE-000511-2]
3.68708e-08	-0.290679	0.085	0.219	0.00051243	2	prelid1a	ENSDARG00000098671	https://zfin.org/ZDB-GENE-040426-1341	PRELI domain containing 1a [Source:ZFIN;Acc:ZDB-GENE-040426-1341]
3.88156e-08	-0.262093	0.029	0.135	0.000539459	2	itpa	ENSDARG00000057529	https://zfin.org/ZDB-GENE-070705-218	inosine triphosphatase (nucleoside triphosphate pyrophosphatase) [Source:ZFIN;Acc:ZDB-GENE-070705-218]
3.91018e-08	-0.268169	0.082	0.217	0.000543436	2	tctex1d1	ENSDARG00000103545	https://zfin.org/ZDB-GENE-040912-49	Tctex1 domain containing 1 [Source:ZFIN;Acc:ZDB-GENE-040912-49]
3.93579e-08	0.342426	0.15	0.069	0.000546996	2	si:dkey-192g7.3	ENSDARG00000094012	https://zfin.org/ZDB-GENE-070912-411	si:dkey-192g7.3 [Source:ZFIN;Acc:ZDB-GENE-070912-411]
4.39943e-08	0.444838	0.416	0.327	0.000611433	2	capns1a	ENSDARG00000035329	https://zfin.org/ZDB-GENE-030113-3	calpain, small subunit 1 a [Source:ZFIN;Acc:ZDB-GENE-030113-3]
4.43156e-08	-0.330786	0.076	0.205	0.000615898	2	si:cabz01007794.1	ENSDARG00000105590	https://zfin.org/ZDB-GENE-160728-147	si:cabz01007794.1 [Source:ZFIN;Acc:ZDB-GENE-160728-147]
4.78052e-08	-0.270659	0.07	0.199	0.000664396	2	si:dkey-23i12.5	ENSDARG00000103682	https://zfin.org/ZDB-GENE-141222-32	si:dkey-23i12.5 [Source:ZFIN;Acc:ZDB-GENE-141222-32]
4.96559e-08	-0.321509	0.079	0.209	0.000690118	2	hyou1	ENSDARG00000013670	https://zfin.org/ZDB-GENE-030131-5344	hypoxia up-regulated 1 [Source:ZFIN;Acc:ZDB-GENE-030131-5344]
4.98254e-08	0.465979	0.167	0.084	0.000692474	2	gyg1a	ENSDARG00000011934	https://zfin.org/ZDB-GENE-040426-2910	glycogenin 1a [Source:ZFIN;Acc:ZDB-GENE-040426-2910]
5.20066e-08	0.403183	0.408	0.31	0.000722788	2	oclna	ENSDARG00000005108	https://zfin.org/ZDB-GENE-040426-2685	occludin a [Source:ZFIN;Acc:ZDB-GENE-040426-2685]
5.52026e-08	-0.300475	0.425	0.627	0.000767206	2	tuba8l4	ENSDARG00000006260	https://zfin.org/ZDB-GENE-040426-860	tubulin, alpha 8 like 4 [Source:ZFIN;Acc:ZDB-GENE-040426-860]
5.84736e-08	0.445212	0.17	0.086	0.000812667	2	bzw2	ENSDARG00000035918	https://zfin.org/ZDB-GENE-040426-746	basic leucine zipper and W2 domains 2 [Source:ZFIN;Acc:ZDB-GENE-040426-746]
5.87098e-08	-0.2998	0.018	0.112	0.000815948	2	si:dkey-16l2.17	ENSDARG00000027196	https://zfin.org/ZDB-GENE-141212-262	si:dkey-16l2.17 [Source:ZFIN;Acc:ZDB-GENE-141212-262]
5.90409e-08	-0.312646	0.138	0.289	0.000820551	2	si:ch211-153b23.4	ENSDARG00000077169	https://zfin.org/ZDB-GENE-030131-7332	si:ch211-153b23.4 [Source:ZFIN;Acc:ZDB-GENE-030131-7332]
5.90712e-08	-0.276185	0.235	0.412	0.000820972	2	cycsb	ENSDARG00000044562	https://zfin.org/ZDB-GENE-040625-38	cytochrome c, somatic b [Source:ZFIN;Acc:ZDB-GENE-040625-38]
6.24872e-08	-0.257041	0.12	0.265	0.000868447	2	taf15	ENSDARG00000070019	https://zfin.org/ZDB-GENE-061215-102	TAF15 RNA polymerase II, TATA box binding protein (TBP)-associated factor [Source:ZFIN;Acc:ZDB-GENE-061215-102]
6.30411e-08	-0.284957	0.109	0.252	0.000876145	2	si:ch211-51e12.7	ENSDARG00000045914	https://zfin.org/ZDB-GENE-030131-8279	si:ch211-51e12.7 [Source:ZFIN;Acc:ZDB-GENE-030131-8279]
6.47935e-08	-0.252171	0.144	0.306	0.0009005	2	psmd8	ENSDARG00000020454	https://zfin.org/ZDB-GENE-040625-136	proteasome 26S subunit, non-ATPase 8 [Source:ZFIN;Acc:ZDB-GENE-040625-136]
8.22034e-240	1.5498	0.727	0.031	1.14246e-235	3	insm1b	ENSDARG00000053301	https://zfin.org/ZDB-GENE-030131-2602	insulinoma-associated 1b [Source:ZFIN;Acc:ZDB-GENE-030131-2602]
2.37585e-179	1.61998	0.682	0.043	3.30196e-175	3	pou4f1	ENSDARG00000005559	https://zfin.org/ZDB-GENE-000523-2	POU class 4 homeobox 1 [Source:ZFIN;Acc:ZDB-GENE-000523-2]
2.04907e-173	2.42516	0.985	0.137	2.8478e-169	3	rbm24a	ENSDARG00000102995	https://zfin.org/ZDB-GENE-040628-1	RNA binding motif protein 24a [Source:ZFIN;Acc:ZDB-GENE-040628-1]
2.35136e-166	1.02536	0.47	0.017	3.26792e-162	3	si:ch211-139d20.3	ENSDARG00000097372	https://zfin.org/ZDB-GENE-131127-287	si:ch211-139d20.3 [Source:ZFIN;Acc:ZDB-GENE-131127-287]
5.76948e-153	1.55143	0.841	0.09	8.01842e-149	3	atp2b1a	ENSDARG00000012684	https://zfin.org/ZDB-GENE-030925-29	ATPase, Ca++ transporting, plasma membrane 1a [Source:ZFIN;Acc:ZDB-GENE-030925-29]
1.4352e-151	1.38151	0.591	0.037	1.99464e-147	3	dld	ENSDARG00000020219	https://zfin.org/ZDB-GENE-990415-47	deltaD [Source:ZFIN;Acc:ZDB-GENE-990415-47]
3.80738e-141	1.9139	0.909	0.122	5.2915e-137	3	tuba1a	ENSDARG00000001889	https://zfin.org/ZDB-GENE-051127-7	tubulin, alpha 1a [Source:ZFIN;Acc:ZDB-GENE-090507-4]
6.38061e-139	1.8673	0.78	0.086	8.86777e-135	3	gadd45gb.1	ENSDARG00000016725	https://zfin.org/ZDB-GENE-040426-2321	growth arrest and DNA-damage-inducible, gamma b, tandem duplicate 1 [Source:ZFIN;Acc:ZDB-GENE-040426-2321]
1.97623e-127	0.810051	0.28	0.005	2.74656e-123	3	tnnc1b	ENSDARG00000037539	https://zfin.org/ZDB-GENE-040625-62	troponin C type 1b (slow) [Source:ZFIN;Acc:ZDB-GENE-040625-62]
1.65972e-126	1.14928	0.417	0.02	2.30668e-122	3	zgc:154006	ENSDARG00000061797	https://zfin.org/ZDB-GENE-061013-134	zgc:154006 [Source:ZFIN;Acc:ZDB-GENE-061013-134]
5.71356e-126	0.66359	0.273	0.005	7.94071e-122	3	atoh1b	ENSDARG00000099564	https://zfin.org/ZDB-GENE-041201-1	atonal bHLH transcription factor 1b [Source:ZFIN;Acc:ZDB-GENE-041201-1]
3.37268e-125	1.66953	0.652	0.066	4.68735e-121	3	hsp90aa1.2	ENSDARG00000024746	https://zfin.org/ZDB-GENE-031001-3	heat shock protein 90, alpha (cytosolic), class A member 1, tandem duplicate 2 [Source:ZFIN;Acc:ZDB-GENE-031001-3]
7.23831e-122	0.828472	0.341	0.012	1.00598e-117	3	myt1a	ENSDARG00000074030	https://zfin.org/ZDB-GENE-030131-3885	myelin transcription factor 1a [Source:ZFIN;Acc:ZDB-GENE-030131-3885]
4.04609e-121	0.925485	0.394	0.018	5.62326e-117	3	sall1a	ENSDARG00000074319	https://zfin.org/ZDB-GENE-020228-2	spalt-like transcription factor 1a [Source:ZFIN;Acc:ZDB-GENE-020228-2]
1.1073e-118	0.959121	0.515	0.038	1.53892e-114	3	cd99l2	ENSDARG00000056722	https://zfin.org/ZDB-GENE-030131-1986	CD99 molecule-like 2 [Source:ZFIN;Acc:ZDB-GENE-030131-1986]
1.52457e-118	0.922365	0.439	0.025	2.11885e-114	3	srrm4	ENSDARG00000086327	https://zfin.org/ZDB-GENE-050208-34	serine/arginine repetitive matrix 4 [Source:ZFIN;Acc:ZDB-GENE-050208-34]
4.97128e-117	1.37614	0.697	0.081	6.90908e-113	3	grxcr1	ENSDARG00000069865	https://zfin.org/ZDB-GENE-070424-166	glutaredoxin, cysteine rich 1 [Source:ZFIN;Acc:ZDB-GENE-070424-166]
1.0906e-116	0.585729	0.212	0.002	1.51572e-112	3	pcdh10b	ENSDARG00000102824	https://zfin.org/ZDB-GENE-030721-4	protocadherin 10b [Source:ZFIN;Acc:ZDB-GENE-030721-4]
2.62438e-114	0.998551	0.447	0.028	3.64736e-110	3	tmem178b	ENSDARG00000006747	https://zfin.org/ZDB-GENE-040718-92	transmembrane protein 178B [Source:ZFIN;Acc:ZDB-GENE-040718-92]
8.09762e-114	1.69193	0.682	0.077	1.12541e-109	3	tuba1c	ENSDARG00000055216	https://zfin.org/ZDB-GENE-061114-1	tubulin, alpha 1c [Source:ZFIN;Acc:ZDB-GENE-061114-1]
3.71706e-107	1.44006	0.727	0.099	5.16597e-103	3	si:ch211-163l21.4	ENSDARG00000078155	https://zfin.org/ZDB-GENE-081105-161	si:ch211-163l21.4 [Source:ZFIN;Acc:ZDB-GENE-081105-161]
2.46201e-106	1.49445	0.765	0.117	3.4217e-102	3	hacd3	ENSDARG00000016038	https://zfin.org/ZDB-GENE-040426-1200	3-hydroxyacyl-CoA dehydratase 3 [Source:ZFIN;Acc:ZDB-GENE-040426-1200]
3.91871e-104	0.626271	0.295	0.01	5.44622e-100	3	sept5a	ENSDARG00000013843	https://zfin.org/ZDB-GENE-030131-7868	septin 5a [Source:ZFIN;Acc:ZDB-GENE-030131-7868]
3.98027e-102	1.37383	0.697	0.095	5.53178e-98	3	rasgef1ba	ENSDARG00000033614	https://zfin.org/ZDB-GENE-030131-5783	RasGEF domain family, member 1Ba [Source:ZFIN;Acc:ZDB-GENE-030131-5783]
7.62788e-95	0.595656	0.258	0.008	1.06012e-90	3	prickle2b	ENSDARG00000037593	https://zfin.org/ZDB-GENE-030724-6	prickle homolog 2b [Source:ZFIN;Acc:ZDB-GENE-030724-6]
1.37839e-94	1.06635	0.364	0.022	1.91569e-90	3	zgc:158291	ENSDARG00000044375	https://zfin.org/ZDB-GENE-061215-70	zgc:158291 [Source:ZFIN;Acc:ZDB-GENE-061215-70]
1.03347e-86	1.18695	0.727	0.123	1.43631e-82	3	lysmd2	ENSDARG00000091771	https://zfin.org/ZDB-GENE-040801-250	LysM, putative peptidoglycan-binding, domain containing 2 [Source:ZFIN;Acc:ZDB-GENE-040801-250]
1.0412e-86	0.695178	0.341	0.021	1.44705e-82	3	ankrd24	ENSDARG00000062103	https://zfin.org/ZDB-GENE-050208-747	ankyrin repeat domain 24 [Source:ZFIN;Acc:ZDB-GENE-050208-747]
1.76717e-85	1.21846	0.652	0.095	2.45602e-81	3	gipc3	ENSDARG00000053074	https://zfin.org/ZDB-GENE-060616-326	GIPC PDZ domain containing family, member 3 [Source:ZFIN;Acc:ZDB-GENE-060616-326]
1.92989e-84	1.09901	0.682	0.11	2.68216e-80	3	bcl2l10	ENSDARG00000026766	https://zfin.org/ZDB-GENE-030825-2	BCL2-like 10 (apoptosis facilitator) [Source:ZFIN;Acc:ZDB-GENE-030825-2]
5.32732e-83	0.710054	0.28	0.014	7.40391e-79	3	nrxn3b	ENSDARG00000062693	https://zfin.org/ZDB-GENE-070206-10	neurexin 3b [Source:ZFIN;Acc:ZDB-GENE-070206-10]
1.13516e-81	0.544558	0.189	0.004	1.57765e-77	3	drgx	ENSDARG00000069329	https://zfin.org/ZDB-GENE-070330-1	dorsal root ganglia homeobox [Source:ZFIN;Acc:ZDB-GENE-070330-1]
3.60032e-81	0.843154	0.311	0.018	5.00372e-77	3	im:7152348	ENSDARG00000097082	https://zfin.org/ZDB-GENE-041111-308	im:7152348 [Source:ZFIN;Acc:ZDB-GENE-041111-308]
6.93064e-80	0.837679	0.402	0.035	9.6322e-76	3	scg3	ENSDARG00000086288	https://zfin.org/ZDB-GENE-040426-1725	secretogranin III [Source:ZFIN;Acc:ZDB-GENE-040426-1725]
6.49967e-79	0.941663	0.28	0.015	9.03325e-75	3	zgc:171699	ENSDARG00000095966	https://zfin.org/ZDB-GENE-071004-24	zgc:171699 [Source:ZFIN;Acc:ZDB-GENE-071004-24]
1.55022e-74	1.01402	0.538	0.072	2.1545e-70	3	dlb	ENSDARG00000004232	https://zfin.org/ZDB-GENE-980526-114	deltaB [Source:ZFIN;Acc:ZDB-GENE-980526-114]
3.5299e-74	1.03196	0.492	0.06	4.90585e-70	3	EMB	ENSDARG00000059485	https://zfin.org/ZDB-GENE-070705-158	si:ch211-261c8.5 [Source:ZFIN;Acc:ZDB-GENE-070705-158]
4.28623e-74	0.966862	0.432	0.046	5.957e-70	3	lrrc73	ENSDARG00000063411	https://zfin.org/ZDB-GENE-111118-2	leucine rich repeat containing 73 [Source:ZFIN;Acc:ZDB-GENE-111118-2]
4.37947e-74	1.76202	0.985	0.51	6.08659e-70	3	hmga1a	ENSDARG00000028335	https://zfin.org/ZDB-GENE-010502-1	high mobility group AT-hook 1a [Source:ZFIN;Acc:ZDB-GENE-010502-1]
7.69855e-74	1.49017	0.992	0.597	1.06994e-69	3	h2afvb	ENSDARG00000099214	https://zfin.org/ZDB-GENE-050506-24	H2A histone family, member Vb [Source:ZFIN;Acc:ZDB-GENE-050506-24]
1.03996e-72	0.588627	0.28	0.017	1.44533e-68	3	myo6b	ENSDARG00000042141	https://zfin.org/ZDB-GENE-030318-3	myosin VIb [Source:ZFIN;Acc:ZDB-GENE-030318-3]
3.65606e-72	0.429286	0.205	0.007	5.08119e-68	3	foxj1b	ENSDARG00000088290	https://zfin.org/ZDB-GENE-041212-76	forkhead box J1b [Source:ZFIN;Acc:ZDB-GENE-041212-76]
3.69519e-72	1.67016	0.97	0.511	5.13558e-68	3	calm1a	ENSDARG00000021811	https://zfin.org/ZDB-GENE-030131-5590	calmodulin 1a [Source:ZFIN;Acc:ZDB-GENE-030131-8308]
5.02537e-72	1.68295	0.795	0.204	6.98426e-68	3	atoh1a	ENSDARG00000055294	https://zfin.org/ZDB-GENE-990415-17	atonal bHLH transcription factor 1a [Source:ZFIN;Acc:ZDB-GENE-990415-17]
6.20728e-72	0.394892	0.205	0.007	8.62688e-68	3	rfx2	ENSDARG00000013575	https://zfin.org/ZDB-GENE-050227-4	regulatory factor X, 2 (influences HLA class II expression) [Source:ZFIN;Acc:ZDB-GENE-050227-4]
7.51227e-71	1.17811	1	0.989	1.04405e-66	3	ptmab	ENSDARG00000101766	https://zfin.org/ZDB-GENE-030131-8681	prothymosin, alpha b [Source:ZFIN;Acc:ZDB-GENE-030131-8681]
2.58347e-70	1.30354	0.735	0.162	3.5905e-66	3	myclb	ENSDARG00000034956	https://zfin.org/ZDB-GENE-030131-5561	v-myc avian myelocytomatosis viral oncogene lung carcinoma derived homolog b [Source:ZFIN;Acc:ZDB-GENE-030131-5561]
1.31108e-69	1.00875	0.295	0.02	1.82213e-65	3	cdc20	ENSDARG00000100741	https://zfin.org/ZDB-GENE-040426-2044	cell division cycle 20 homolog [Source:ZFIN;Acc:ZDB-GENE-040426-2044]
4.38722e-69	0.877526	0.386	0.038	6.09736e-65	3	barhl1a	ENSDARG00000035508	https://zfin.org/ZDB-GENE-050417-212	BarH-like homeobox 1a [Source:ZFIN;Acc:ZDB-GENE-050417-212]
5.68166e-69	0.556734	0.288	0.019	7.89638e-65	3	ccdc30	ENSDARG00000056961	https://zfin.org/ZDB-GENE-130530-667	coiled-coil domain containing 30 [Source:ZFIN;Acc:ZDB-GENE-130530-667]
7.06345e-69	0.935483	0.242	0.013	9.81678e-65	3	si:ch73-21g5.7	ENSDARG00000093156	https://zfin.org/ZDB-GENE-081104-260	si:ch73-21g5.7 [Source:ZFIN;Acc:ZDB-GENE-081104-260]
4.47772e-68	0.924673	0.538	0.081	6.22314e-64	3	tmed4	ENSDARG00000024954	https://zfin.org/ZDB-GENE-040625-140	transmembrane p24 trafficking protein 4 [Source:ZFIN;Acc:ZDB-GENE-040625-140]
8.78027e-68	0.282545	0.129	0.001	1.22028e-63	3	zgc:101731	ENSDARG00000040965	https://zfin.org/ZDB-GENE-040912-57	zgc:101731 [Source:ZFIN;Acc:ZDB-GENE-040912-57]
1.04863e-66	1.11611	0.659	0.13	1.45739e-62	3	eml2	ENSDARG00000008808	https://zfin.org/ZDB-GENE-050706-71	echinoderm microtubule associated protein like 2 [Source:ZFIN;Acc:ZDB-GENE-050706-71]
1.14854e-66	-1.62969	1	1	1.59624e-62	3	si:rp71-1c10.11	ENSDARG00000096721	https://zfin.org/ZDB-GENE-130603-61	si:rp71-1c10.11 [Source:ZFIN;Acc:ZDB-GENE-130603-61]
6.57679e-66	-1.80521	1	1	9.14042e-62	3	si:dkey-205h13.2	ENSDARG00000089429	https://zfin.org/ZDB-GENE-080225-18	si:dkey-205h13.2 [Source:ZFIN;Acc:ZDB-GENE-080225-18]
9.99082e-66	0.822354	0.5	0.068	1.38852e-61	3	hsbp1a	ENSDARG00000069425	https://zfin.org/ZDB-GENE-050320-136	heat shock factor binding protein 1a [Source:ZFIN;Acc:ZDB-GENE-050320-136]
1.16595e-64	0.796798	0.5	0.068	1.62043e-60	3	tspan13b	ENSDARG00000070479	https://zfin.org/ZDB-GENE-041010-45	tetraspanin 13b [Source:ZFIN;Acc:ZDB-GENE-041010-45]
2.1443e-64	0.403964	0.159	0.004	2.98014e-60	3	kitb	ENSDARG00000056133	https://zfin.org/ZDB-GENE-050916-2	v-kit Hardy-Zuckerman 4 feline sarcoma viral oncogene homolog b [Source:ZFIN;Acc:ZDB-GENE-050916-2]
3.93601e-64	1.13672	0.742	0.171	5.47027e-60	3	si:dkeyp-110e4.11	ENSDARG00000071585	https://zfin.org/ZDB-GENE-070424-267	si:dkeyp-110e4.11 [Source:ZFIN;Acc:ZDB-GENE-070424-267]
1.28022e-63	1.24769	0.5	0.076	1.77925e-59	3	tp53inp2	ENSDARG00000088178	https://zfin.org/ZDB-GENE-120420-1	tumor protein p53 inducible nuclear protein 2 [Source:ZFIN;Acc:ZDB-GENE-120420-1]
4.10964e-63	1.16283	0.985	0.65	5.71158e-59	3	hnrnpabb	ENSDARG00000099865	https://zfin.org/ZDB-GENE-040426-2516	heterogeneous nuclear ribonucleoprotein A/Bb [Source:ZFIN;Acc:ZDB-GENE-040426-2516]
2.41828e-62	0.64794	0.273	0.019	3.36092e-58	3	insm1a	ENSDARG00000091756	https://zfin.org/ZDB-GENE-040426-1810	insulinoma-associated 1a [Source:ZFIN;Acc:ZDB-GENE-040426-1810]
3.82316e-62	0.749918	0.432	0.053	5.31342e-58	3	smad7	ENSDARG00000016858	https://zfin.org/ZDB-GENE-030128-3	SMAD family member 7 [Source:ZFIN;Acc:ZDB-GENE-030128-3]
1.74324e-61	1.22411	0.788	0.232	2.42275e-57	3	anp32e	ENSDARG00000054804	https://zfin.org/ZDB-GENE-040426-2448	acidic (leucine-rich) nuclear phosphoprotein 32 family, member E [Source:ZFIN;Acc:ZDB-GENE-040426-2448]
2.10131e-61	0.582527	0.129	0.002	2.92039e-57	3	si:ch211-193l2.6	ENSDARG00000103982	https://zfin.org/ZDB-GENE-141216-353	si:ch211-193l2.6 [Source:ZFIN;Acc:ZDB-GENE-141216-353]
4.16117e-61	1.45825	0.977	0.497	5.78319e-57	3	si:ch211-222l21.1	ENSDARG00000076532	https://zfin.org/ZDB-GENE-030131-247	si:ch211-222l21.1 [Source:ZFIN;Acc:ZDB-GENE-030131-247]
6.16378e-61	1.84605	0.992	0.829	8.56642e-57	3	hmgn2	ENSDARG00000099572	https://zfin.org/ZDB-GENE-051030-81	high mobility group nucleosomal binding domain 2 [Source:ZFIN;Acc:ZDB-GENE-051030-81]
6.55458e-61	0.922975	0.523	0.083	9.10956e-57	3	si:dkey-16l2.17	ENSDARG00000027196	https://zfin.org/ZDB-GENE-141212-262	si:dkey-16l2.17 [Source:ZFIN;Acc:ZDB-GENE-141212-262]
7.60182e-61	0.53675	0.22	0.012	1.0565e-56	3	si:ch211-274p24.2	ENSDARG00000095185	https://zfin.org/ZDB-GENE-050309-265	si:ch211-274p24.2 [Source:ZFIN;Acc:ZDB-GENE-050309-265]
1.2874e-60	0.871908	0.523	0.084	1.78922e-56	3	pllp	ENSDARG00000062756	https://zfin.org/ZDB-GENE-050419-195	plasmolipin [Source:ZFIN;Acc:ZDB-GENE-050419-195]
4.5214e-60	1.44764	0.894	0.408	6.28384e-56	3	hmgb3a	ENSDARG00000056725	https://zfin.org/ZDB-GENE-050428-1	high mobility group box 3a [Source:ZFIN;Acc:ZDB-GENE-050428-1]
6.80261e-59	1.08829	0.432	0.059	9.45426e-55	3	atp1b2b	ENSDARG00000034424	https://zfin.org/ZDB-GENE-010718-1	ATPase, Na+/K+ transporting, beta 2b polypeptide [Source:ZFIN;Acc:ZDB-GENE-010718-1]
1.92377e-58	0.552998	0.242	0.016	2.67366e-54	3	stk25a	ENSDARG00000002210	https://zfin.org/ZDB-GENE-041010-92	serine/threonine kinase 25a [Source:ZFIN;Acc:ZDB-GENE-041010-92]
2.09312e-58	0.506298	0.205	0.011	2.90902e-54	3	gfi1ab	ENSDARG00000044457	https://zfin.org/ZDB-GENE-040116-8	growth factor independent 1A transcription repressor b [Source:ZFIN;Acc:ZDB-GENE-040116-8]
7.69435e-57	1.04402	0.53	0.094	1.06936e-52	3	ift27	ENSDARG00000099279	https://zfin.org/ZDB-GENE-041212-9	intraflagellar transport 27 homolog (Chlamydomonas) [Source:ZFIN;Acc:ZDB-GENE-041212-9]
1.49901e-55	1.18004	0.955	0.547	2.08333e-51	3	psmb7	ENSDARG00000037962	https://zfin.org/ZDB-GENE-001208-4	proteasome subunit beta 7 [Source:ZFIN;Acc:ZDB-GENE-001208-4]
8.0041e-55	0.935974	0.561	0.103	1.11241e-50	3	sox4a.1	ENSDARG00000004588	https://zfin.org/ZDB-GENE-030131-8290	SRY (sex determining region Y)-box 4a [Source:ZFIN;Acc:ZDB-GENE-030131-8290]
8.91494e-55	0.417347	0.159	0.006	1.239e-50	3	sid1	ENSDARG00000095540	https://zfin.org/ZDB-GENE-020620-1	secreted immunoglobulin domain 1 [Source:ZFIN;Acc:ZDB-GENE-020620-1]
2.88739e-54	-1.83516	0.674	0.942	4.0129e-50	3	tmem176l.4	ENSDARG00000074390	https://zfin.org/ZDB-GENE-030131-3532	transmembrane protein 176l.4 [Source:ZFIN;Acc:ZDB-GENE-030131-3532]
1.02719e-53	0.718615	0.341	0.038	1.42759e-49	3	ide	ENSDARG00000075570	https://zfin.org/ZDB-GENE-070410-85	insulin-degrading enzyme [Source:ZFIN;Acc:ZDB-GENE-070410-85]
2.85359e-53	1.4351	0.97	0.746	3.96592e-49	3	hmgb2b	ENSDARG00000053990	https://zfin.org/ZDB-GENE-040912-122	high mobility group box 2b [Source:ZFIN;Acc:ZDB-GENE-040912-122]
3.11474e-53	0.707329	0.409	0.057	4.32886e-49	3	tox	ENSDARG00000032317	https://zfin.org/ZDB-GENE-070912-181	thymocyte selection-associated high mobility group box [Source:ZFIN;Acc:ZDB-GENE-070912-181]
2.46006e-52	0.978345	1	0.726	3.41899e-48	3	cirbpa	ENSDARG00000103672	https://zfin.org/ZDB-GENE-050417-329	cold inducible RNA binding protein a [Source:ZFIN;Acc:ZDB-GENE-050417-329]
3.03428e-52	-2.12297	0.833	0.947	4.21705e-48	3	zgc:77517	ENSDARG00000028618	https://zfin.org/ZDB-GENE-040426-1508	zgc:77517 [Source:ZFIN;Acc:ZDB-GENE-040426-1508]
3.75498e-52	0.513631	0.212	0.014	5.21867e-48	3	dlc	ENSDARG00000002336	https://zfin.org/ZDB-GENE-000125-4	deltaC [Source:ZFIN;Acc:ZDB-GENE-000125-4]
4.46713e-52	-0.922662	1	1	6.20842e-48	3	malat1	ENSDARG00000099970	https://zfin.org/ZDB-GENE-141216-248	metastasis associated lung adenocarcinoma transcript 1 [Source:ZFIN;Acc:ZDB-GENE-141216-248]
5.18199e-52	1.04044	0.576	0.119	7.20192e-48	3	shisa2	ENSDARG00000034138	https://zfin.org/ZDB-GENE-030925-31	shisa family member 2 [Source:ZFIN;Acc:ZDB-GENE-030925-31]
1.20015e-51	0.276406	0.129	0.003	1.66797e-47	3	zgc:195245	ENSDARG00000078917	https://zfin.org/ZDB-GENE-081022-200	zgc:195245 [Source:ZFIN;Acc:ZDB-GENE-081022-200]
1.76568e-51	-1.81565	0.432	0.892	2.45395e-47	3	si:ch211-103f14.3	ENSDARG00000088315	https://zfin.org/ZDB-GENE-110411-160	si:ch211-103f14.3 [Source:ZFIN;Acc:ZDB-GENE-110411-160]
2.28687e-51	0.994881	0.576	0.126	3.1783e-47	3	hnrnpa0a	ENSDARG00000105465	https://zfin.org/
2.30813e-51	0.429884	0.174	0.008	3.20785e-47	3	gpm6ab	ENSDARG00000004621	https://zfin.org/ZDB-GENE-030710-8	glycoprotein M6Ab [Source:ZFIN;Acc:ZDB-GENE-030710-8]
4.41506e-51	0.500928	0.205	0.013	6.13605e-47	3	aif1l	ENSDARG00000009336	https://zfin.org/ZDB-GENE-030131-9646	allograft inflammatory factor 1-like [Source:ZFIN;Acc:ZDB-GENE-030131-9646]
1.37837e-50	1.27884	0.962	0.498	1.91566e-46	3	si:ch211-243g18.2	ENSDARG00000044261	https://zfin.org/ZDB-GENE-030131-2830	si:ch211-243g18.2 [Source:ZFIN;Acc:ZDB-GENE-030131-2830]
1.88108e-50	1.34101	0.924	0.462	2.61432e-46	3	zgc:55461	ENSDARG00000041723	https://zfin.org/ZDB-GENE-040426-2879	zgc:55461 [Source:ZFIN;Acc:ZDB-GENE-040426-2879]
4.12983e-50	0.417866	0.174	0.009	5.73964e-46	3	WIPF3	ENSDARG00000036245	https://zfin.org/ZDB-GENE-030804-15	sb:cb649 [Source:ZFIN;Acc:ZDB-GENE-030804-15]
6.35924e-50	0.998975	0.818	0.28	8.83807e-46	3	psma6a	ENSDARG00000019398	https://zfin.org/ZDB-GENE-020326-1	proteasome subunit alpha 6a [Source:ZFIN;Acc:ZDB-GENE-020326-1]
1.10843e-49	1.21746	0.932	0.567	1.5405e-45	3	zgc:101000	ENSDARG00000015123	https://zfin.org/ZDB-GENE-040808-35	zgc:101000 [Source:ZFIN;Acc:ZDB-GENE-040808-35]
3.62918e-49	1.07155	0.939	0.566	5.04384e-45	3	psma3	ENSDARG00000086618	https://zfin.org/ZDB-GENE-050913-120	proteasome subunit alpha 3 [Source:ZFIN;Acc:ZDB-GENE-050913-120]
1.54753e-48	1.04936	0.833	0.279	2.15076e-44	3	prr15la	ENSDARG00000025615	https://zfin.org/ZDB-GENE-040801-218	proline rich 15-like a [Source:ZFIN;Acc:ZDB-GENE-040801-218]
2.05411e-48	0.751273	0.545	0.108	2.8548e-44	3	psmd11b	ENSDARG00000005134	https://zfin.org/ZDB-GENE-030131-984	proteasome 26S subunit, non-ATPase 11b [Source:ZFIN;Acc:ZDB-GENE-030131-984]
3.499e-48	0.966786	0.932	0.424	4.86292e-44	3	psma4	ENSDARG00000045928	https://zfin.org/ZDB-GENE-040426-1932	proteasome subunit alpha 4 [Source:ZFIN;Acc:ZDB-GENE-040426-1932]
2.37183e-47	0.278824	0.121	0.003	3.29637e-43	3	map3k19	ENSDARG00000094272	https://zfin.org/ZDB-GENE-081104-140	mitogen-activated protein kinase kinase kinase 19 [Source:ZFIN;Acc:ZDB-GENE-081104-140]
1.02461e-46	0.343323	0.152	0.007	1.424e-42	3	arhgap11a	ENSDARG00000098717	https://zfin.org/
1.29163e-46	1.05249	0.932	0.483	1.79511e-42	3	psmb6	ENSDARG00000002240	https://zfin.org/ZDB-GENE-990415-216	proteasome subunit beta 6 [Source:ZFIN;Acc:ZDB-GENE-990415-216]
1.54452e-46	0.380384	0.159	0.008	2.14657e-42	3	cox5b2	ENSDARG00000068738	https://zfin.org/ZDB-GENE-060825-71	cytochrome c oxidase subunit Vb 2 [Source:ZFIN;Acc:ZDB-GENE-060825-71]
8.27198e-46	0.963416	0.235	0.021	1.14964e-41	3	emx2	ENSDARG00000039701	https://zfin.org/ZDB-GENE-990415-54	empty spiracles homeobox 2 [Source:ZFIN;Acc:ZDB-GENE-990415-54]
1.60812e-45	0.319688	0.121	0.004	2.23497e-41	3	ebf2	ENSDARG00000042525	https://zfin.org/ZDB-GENE-990715-11	early B-cell factor 2 [Source:ZFIN;Acc:ZDB-GENE-990715-11]
2.09087e-45	0.863275	0.371	0.057	2.90589e-41	3	asap1b	ENSDARG00000039729	https://zfin.org/ZDB-GENE-091112-16	ArfGAP with SH3 domain, ankyrin repeat and PH domain 1b [Source:ZFIN;Acc:ZDB-GENE-091112-16]
2.60047e-45	0.614468	0.25	0.024	3.61413e-41	3	pttg1	ENSDARG00000075421	https://zfin.org/ZDB-GENE-081104-345	pituitary tumor-transforming 1 [Source:ZFIN;Acc:ZDB-GENE-081104-345]
1.61466e-44	0.987608	0.977	0.787	2.24406e-40	3	si:ch73-1a9.3	ENSDARG00000103919	https://zfin.org/ZDB-GENE-141216-84	si:ch73-1a9.3 [Source:ZFIN;Acc:ZDB-GENE-141216-84]
1.91942e-44	0.372986	0.182	0.012	2.6676e-40	3	zgc:66433	ENSDARG00000071697	https://zfin.org/ZDB-GENE-030131-9832	zgc:66433 [Source:ZFIN;Acc:ZDB-GENE-030131-9832]
6.27607e-44	0.939459	0.894	0.375	8.72249e-40	3	psmb4	ENSDARG00000054696	https://zfin.org/ZDB-GENE-050417-333	proteasome subunit beta 4 [Source:ZFIN;Acc:ZDB-GENE-050417-333]
8.29234e-44	0.959857	0.879	0.405	1.15247e-39	3	cct5	ENSDARG00000045399	https://zfin.org/ZDB-GENE-030131-977	chaperonin containing TCP1, subunit 5 (epsilon) [Source:ZFIN;Acc:ZDB-GENE-030131-977]
9.03575e-44	0.918529	0.985	0.702	1.25579e-39	3	cirbpb	ENSDARG00000013351	https://zfin.org/ZDB-GENE-030131-5841	cold inducible RNA binding protein b [Source:ZFIN;Acc:ZDB-GENE-030131-5841]
2.97547e-43	1.16387	0.932	0.572	4.13531e-39	3	nqo1	ENSDARG00000010250	https://zfin.org/ZDB-GENE-030131-1226	NAD(P)H dehydrogenase, quinone 1 [Source:ZFIN;Acc:ZDB-GENE-030131-1226]
3.31263e-43	0.492644	0.227	0.021	4.60389e-39	3	si:ch73-111k22.3	ENSDARG00000103492	https://zfin.org/ZDB-GENE-141212-371	si:ch73-111k22.3 [Source:ZFIN;Acc:ZDB-GENE-141212-371]
3.3441e-43	0.572143	0.212	0.018	4.64763e-39	3	kif11	ENSDARG00000010948	https://zfin.org/ZDB-GENE-020426-1	kinesin family member 11 [Source:ZFIN;Acc:ZDB-GENE-020426-1]
4.83646e-43	-1.68256	0.508	0.852	6.72171e-39	3	phlda2	ENSDARG00000042874	https://zfin.org/ZDB-GENE-050522-73	pleckstrin homology-like domain, family A, member 2 [Source:ZFIN;Acc:ZDB-GENE-050522-73]
6.76909e-43	0.718834	0.553	0.123	9.40768e-39	3	hnrnpc	ENSDARG00000053810	https://zfin.org/ZDB-GENE-040426-2043	heterogeneous nuclear ribonucleoprotein C [Source:ZFIN;Acc:ZDB-GENE-040426-2043]
7.96538e-43	1.06383	0.538	0.13	1.10703e-38	3	mtmr8	ENSDARG00000008592	https://zfin.org/ZDB-GENE-040426-1016	myotubularin related protein 8 [Source:ZFIN;Acc:ZDB-GENE-040426-1016]
8.99838e-43	0.79943	1	0.957	1.25059e-38	3	si:ch211-153b23.5	ENSDARG00000058206	https://zfin.org/ZDB-GENE-030131-9744	si:ch211-153b23.5 [Source:ZFIN;Acc:ZDB-GENE-030131-9744]
2.27135e-42	0.402473	0.136	0.006	3.15673e-38	3	CR847844.2	ENSDARG00000087245	https://zfin.org/
2.3549e-42	1.03732	0.742	0.268	3.27284e-38	3	psmd8	ENSDARG00000020454	https://zfin.org/ZDB-GENE-040625-136	proteasome 26S subunit, non-ATPase 8 [Source:ZFIN;Acc:ZDB-GENE-040625-136]
2.53843e-41	0.897717	0.939	0.503	3.52792e-37	3	psmb3	ENSDARG00000013938	https://zfin.org/ZDB-GENE-040426-2682	proteasome subunit beta 3 [Source:ZFIN;Acc:ZDB-GENE-040426-2682]
2.8153e-41	0.509753	0.288	0.036	3.9127e-37	3	arl4ab	ENSDARG00000033182	https://zfin.org/ZDB-GENE-030219-167	ADP-ribosylation factor-like 4ab [Source:ZFIN;Acc:ZDB-GENE-030219-167]
3.85676e-41	0.927188	0.962	0.558	5.36012e-37	3	snrpe	ENSDARG00000033175	https://zfin.org/ZDB-GENE-040426-1112	small nuclear ribonucleoprotein polypeptide E [Source:ZFIN;Acc:ZDB-GENE-040426-1112]
6.34215e-41	0.394772	0.136	0.006	8.81432e-37	3	her8.2	ENSDARG00000069675	https://zfin.org/ZDB-GENE-060815-4	hairy-related 8.2 [Source:ZFIN;Acc:ZDB-GENE-060815-4]
8.44536e-41	0.926705	0.795	0.304	1.17374e-36	3	psmd7	ENSDARG00000102417	https://zfin.org/ZDB-GENE-030131-5541	proteasome 26S subunit, non-ATPase 7 [Source:ZFIN;Acc:ZDB-GENE-030131-5541]
8.45146e-41	0.592693	0.205	0.017	1.17458e-36	3	aspm	ENSDARG00000103754	https://zfin.org/ZDB-GENE-050208-620	abnormal spindle microtubule assembly [Source:ZFIN;Acc:ZDB-GENE-050208-620]
1.18379e-40	0.928503	0.682	0.216	1.64523e-36	3	si:ch211-51e12.7	ENSDARG00000045914	https://zfin.org/ZDB-GENE-030131-8279	si:ch211-51e12.7 [Source:ZFIN;Acc:ZDB-GENE-030131-8279]
1.79961e-40	-1.19104	0.803	0.934	2.5011e-36	3	tmsb4x	ENSDARG00000077777	https://zfin.org/ZDB-GENE-030131-8304	thymosin, beta 4 x [Source:ZFIN;Acc:ZDB-GENE-030131-8304]
2.11727e-40	-1.58671	0.371	0.82	2.94259e-36	3	krt1-c5	ENSDARG00000026979	https://zfin.org/ZDB-GENE-060316-3	keratin, type 1, gene c5 [Source:ZFIN;Acc:ZDB-GENE-060316-3]
4.15631e-40	-1.20516	0.614	0.882	5.77644e-36	3	cd9b	ENSDARG00000016691	https://zfin.org/ZDB-GENE-040426-2768	CD9 molecule b [Source:ZFIN;Acc:ZDB-GENE-040426-2768]
4.41459e-40	0.96775	0.939	0.743	6.13539e-36	3	prdx2	ENSDARG00000025350	https://zfin.org/ZDB-GENE-030326-2	peroxiredoxin 2 [Source:ZFIN;Acc:ZDB-GENE-030326-2]
5.41426e-40	1.05828	0.682	0.22	7.52474e-36	3	calm2a	ENSDARG00000031427	https://zfin.org/ZDB-GENE-030131-5590	calmodulin 2a (phosphorylase kinase, delta) [Source:ZFIN;Acc:ZDB-GENE-030804-3]
5.68196e-40	0.295385	0.129	0.006	7.89679e-36	3	nek2	ENSDARG00000005619	https://zfin.org/ZDB-GENE-040426-752	NIMA-related kinase 2 [Source:ZFIN;Acc:ZDB-GENE-040426-752]
1.16397e-39	1.31506	0.992	0.911	1.61769e-35	3	hmgb2a	ENSDARG00000029722	https://zfin.org/ZDB-GENE-051120-126	high mobility group box 2a [Source:ZFIN;Acc:ZDB-GENE-051120-126]
1.3014e-39	-1.30374	0.795	0.925	1.80869e-35	3	zgc:158343	ENSDARG00000099411	https://zfin.org/ZDB-GENE-061201-9	zgc:158343 [Source:ZFIN;Acc:ZDB-GENE-061201-9]
1.5178e-39	0.480706	0.265	0.031	2.10944e-35	3	katnal1	ENSDARG00000099156	https://zfin.org/ZDB-GENE-041114-141	katanin p60 subunit A-like 1 [Source:ZFIN;Acc:ZDB-GENE-041114-141]
1.67223e-39	0.818634	0.811	0.284	2.32406e-35	3	tcp1	ENSDARG00000017891	https://zfin.org/ZDB-GENE-990714-24	t-complex 1 [Source:ZFIN;Acc:ZDB-GENE-990714-24]
4.1441e-39	0.702732	0.447	0.09	5.75947e-35	3	polb	ENSDARG00000003749	https://zfin.org/ZDB-GENE-040830-1	polymerase (DNA directed), beta [Source:ZFIN;Acc:ZDB-GENE-040830-1]
9.73189e-39	0.956548	0.947	0.605	1.35254e-34	3	pomp	ENSDARG00000032296	https://zfin.org/ZDB-GENE-040801-10	proteasome maturation protein [Source:ZFIN;Acc:ZDB-GENE-040801-10]
9.75868e-39	0.836135	0.795	0.289	1.35626e-34	3	prmt1	ENSDARG00000010246	https://zfin.org/ZDB-GENE-030131-693	protein arginine methyltransferase 1 [Source:ZFIN;Acc:ZDB-GENE-030131-693]
1.01665e-38	0.729397	0.409	0.079	1.41295e-34	3	dpcd	ENSDARG00000060501	https://zfin.org/ZDB-GENE-060825-166	deleted in primary ciliary dyskinesia homolog (mouse) [Source:ZFIN;Acc:ZDB-GENE-060825-166]
1.22091e-38	0.590462	0.25	0.029	1.69682e-34	3	cdkn3	ENSDARG00000039130	https://zfin.org/ZDB-GENE-060427-2	cyclin-dependent kinase inhibitor 3 [Source:ZFIN;Acc:ZDB-GENE-060427-2]
2.06957e-38	0.284334	0.114	0.004	2.87628e-34	3	fam49a	ENSDARG00000035907	https://zfin.org/ZDB-GENE-040801-125	family with sequence similarity 49, member A [Source:ZFIN;Acc:ZDB-GENE-040801-125]
2.28459e-38	-1.53953	0.379	0.801	3.17513e-34	3	pdia3	ENSDARG00000102640	https://zfin.org/ZDB-GENE-031002-9	protein disulfide isomerase family A, member 3 [Source:ZFIN;Acc:ZDB-GENE-031002-9]
4.23982e-38	0.644264	0.508	0.114	5.8925e-34	3	anapc15	ENSDARG00000101285	https://zfin.org/ZDB-GENE-060825-43	anaphase promoting complex subunit 15 [Source:ZFIN;Acc:ZDB-GENE-060825-43]
5.1718e-38	0.828848	0.652	0.195	7.18777e-34	3	hes6	ENSDARG00000019335	https://zfin.org/ZDB-GENE-030828-5	hes family bHLH transcription factor 6 [Source:ZFIN;Acc:ZDB-GENE-030828-5]
5.53146e-38	0.844356	0.856	0.357	7.68762e-34	3	h2afva	ENSDARG00000068820	https://zfin.org/ZDB-GENE-020717-1	H2A histone family, member Va [Source:ZFIN;Acc:ZDB-GENE-020717-1]
5.53681e-38	0.93229	0.932	0.631	7.69505e-34	3	calm3b	ENSDARG00000074057	https://zfin.org/ZDB-GENE-030131-5590	calmodulin 3b (phosphorylase kinase, delta) [Source:ZFIN;Acc:ZDB-GENE-030131-527]
5.7135e-38	0.906707	0.939	0.717	7.94062e-34	3	hnrnpaba	ENSDARG00000007960	https://zfin.org/ZDB-GENE-030131-185	heterogeneous nuclear ribonucleoprotein A/Ba [Source:ZFIN;Acc:ZDB-GENE-030131-185]
6.66492e-38	0.915122	0.917	0.502	9.26291e-34	3	psmb1	ENSDARG00000009640	https://zfin.org/ZDB-GENE-040618-2	proteasome subunit beta 1 [Source:ZFIN;Acc:ZDB-GENE-040618-2]
7.28623e-38	0.286755	0.121	0.005	1.01264e-33	3	elovl4a	ENSDARG00000006773	https://zfin.org/ZDB-GENE-040426-1767	ELOVL fatty acid elongase 4a [Source:ZFIN;Acc:ZDB-GENE-040426-1767]
8.34144e-38	0.669548	0.364	0.063	1.15929e-33	3	sh3glb2b	ENSDARG00000035470	https://zfin.org/ZDB-GENE-040426-833	SH3-domain GRB2-like endophilin B2b [Source:ZFIN;Acc:ZDB-GENE-040426-833]
9.17627e-38	0.318977	0.144	0.008	1.27532e-33	3	CBFA2T3	ENSDARG00000079012	https://zfin.org/	CBFA2/RUNX1 translocation partner 3 [Source:HGNC Symbol;Acc:HGNC:1537]
2.45566e-37	0.922029	0.864	0.47	3.41288e-33	3	hdac1	ENSDARG00000015427	https://zfin.org/ZDB-GENE-020419-32	histone deacetylase 1 [Source:ZFIN;Acc:ZDB-GENE-020419-32]
2.84636e-37	0.75739	0.523	0.126	3.95586e-33	3	ccdc12	ENSDARG00000023003	https://zfin.org/ZDB-GENE-040801-108	coiled-coil domain containing 12 [Source:ZFIN;Acc:ZDB-GENE-040801-108]
3.09038e-37	0.799841	0.992	0.851	4.29501e-33	3	calm2b	ENSDARG00000015050	https://zfin.org/ZDB-GENE-030131-5590	calmodulin 2b, (phosphorylase kinase, delta) [Source:ZFIN;Acc:ZDB-GENE-020415-2]
8.30003e-37	0.815513	0.871	0.355	1.15354e-32	3	txn	ENSDARG00000044125	https://zfin.org/ZDB-GENE-040718-162	thioredoxin [Source:ZFIN;Acc:ZDB-GENE-040718-162]
2.43232e-36	1.05127	0.235	0.028	3.38044e-32	3	zgc:194627	ENSDARG00000102594	https://zfin.org/ZDB-GENE-081022-132	zgc:194627 [Source:ZFIN;Acc:ZDB-GENE-081022-132]
2.46193e-36	-1.46395	0.591	0.876	3.42159e-32	3	id1.1	ENSDARG00000096939	https://zfin.org/
3.39741e-36	0.867974	0.879	0.422	4.72173e-32	3	snrpf	ENSDARG00000105037	https://zfin.org/ZDB-GENE-040930-9	small nuclear ribonucleoprotein polypeptide F [Source:ZFIN;Acc:ZDB-GENE-040930-9]
3.97074e-36	0.929871	0.803	0.335	5.51853e-32	3	si:dkey-16m19.4	ENSDARG00000091937	https://zfin.org/ZDB-GENE-060503-618	si:dkey-16m19.4 [Source:ZFIN;Acc:ZDB-GENE-060503-618]
4.50566e-36	0.888585	0.644	0.211	6.26197e-32	3	psmc1a	ENSDARG00000030537	https://zfin.org/ZDB-GENE-030131-8730	proteasome 26S subunit, ATPase 1a [Source:ZFIN;Acc:ZDB-GENE-030131-8730]
6.19162e-36	0.813997	0.924	0.554	8.60511e-32	3	rbm8a	ENSDARG00000016516	https://zfin.org/ZDB-GENE-050306-51	RNA binding motif protein 8A [Source:ZFIN;Acc:ZDB-GENE-050306-51]
6.21305e-36	0.672465	0.508	0.121	8.6349e-32	3	ppih	ENSDARG00000041530	https://zfin.org/ZDB-GENE-040625-127	peptidylprolyl isomerase H (cyclophilin H) [Source:ZFIN;Acc:ZDB-GENE-040625-127]
1.12393e-35	0.652149	0.477	0.11	1.56204e-31	3	wrb	ENSDARG00000074271	https://zfin.org/ZDB-GENE-030131-7696	tryptophan rich basic protein [Source:ZFIN;Acc:ZDB-GENE-030131-7696]
1.53477e-35	0.270842	0.114	0.005	2.13302e-31	3	ccdc105	ENSDARG00000054136	https://zfin.org/ZDB-GENE-131121-219	coiled-coil domain containing 105 [Source:ZFIN;Acc:ZDB-GENE-131121-219]
1.76726e-35	0.771951	0.576	0.162	2.45614e-31	3	ube2a	ENSDARG00000098466	https://zfin.org/ZDB-GENE-030616-72	ubiquitin-conjugating enzyme E2A (RAD6 homolog) [Source:ZFIN;Acc:ZDB-GENE-030616-72]
2.16921e-35	0.274477	0.114	0.005	3.01477e-31	3	myl10	ENSDARG00000062592	https://zfin.org/ZDB-GENE-050417-421	myosin, light chain 10, regulatory [Source:ZFIN;Acc:ZDB-GENE-050417-421]
2.43452e-35	0.539161	0.273	0.038	3.3835e-31	3	ropn1l	ENSDARG00000058370	https://zfin.org/ZDB-GENE-040724-235	rhophilin associated tail protein 1-like [Source:ZFIN;Acc:ZDB-GENE-040724-235]
2.93373e-35	0.877277	0.735	0.274	4.0773e-31	3	psmc6	ENSDARG00000037038	https://zfin.org/ZDB-GENE-030131-304	proteasome 26S subunit, ATPase 6 [Source:ZFIN;Acc:ZDB-GENE-030131-304]
3.75213e-35	0.816546	0.864	0.372	5.21471e-31	3	CABZ01075268.2	ENSDARG00000104674	https://zfin.org/
5.862e-35	0.84387	0.697	0.241	8.14701e-31	3	psmc2	ENSDARG00000020101	https://zfin.org/ZDB-GENE-040426-1327	proteasome 26S subunit, ATPase 2 [Source:ZFIN;Acc:ZDB-GENE-040426-1327]
7.47449e-35	0.588994	0.5	0.117	1.0388e-30	3	adipor1a	ENSDARG00000002912	https://zfin.org/ZDB-GENE-040718-169	adiponectin receptor 1a [Source:ZFIN;Acc:ZDB-GENE-040718-169]
1.19928e-34	0.40879	0.273	0.038	1.66677e-30	3	rbm38	ENSDARG00000058818	https://zfin.org/ZDB-GENE-030131-5923	RNA binding motif protein 38 [Source:ZFIN;Acc:ZDB-GENE-030131-5923]
1.3463e-34	0.857865	0.735	0.273	1.87109e-30	3	sf3b5	ENSDARG00000016855	https://zfin.org/ZDB-GENE-040718-181	splicing factor 3b, subunit 5 [Source:ZFIN;Acc:ZDB-GENE-040718-181]
1.44988e-34	0.65375	0.992	0.912	2.01504e-30	3	h3f3d	ENSDARG00000045248	https://zfin.org/ZDB-GENE-050417-65	H3 histone, family 3D [Source:ZFIN;Acc:ZDB-GENE-040426-1023]
1.81951e-34	0.87129	0.871	0.416	2.52875e-30	3	si:rp71-45k5.4	ENSDARG00000035679	https://zfin.org/ZDB-GENE-060503-941	si:rp71-45k5.4 [Source:ZFIN;Acc:ZDB-GENE-060503-941]
3.49671e-34	0.879942	0.795	0.344	4.85973e-30	3	psma5	ENSDARG00000003526	https://zfin.org/ZDB-GENE-040625-96	proteasome subunit alpha 5 [Source:ZFIN;Acc:ZDB-GENE-040625-96]
3.85138e-34	0.596548	0.409	0.084	5.35264e-30	3	zgc:101851	ENSDARG00000037199	https://zfin.org/ZDB-GENE-040912-123	zgc:101851 [Source:ZFIN;Acc:ZDB-GENE-040912-123]
4.66985e-34	0.603636	0.326	0.056	6.49015e-30	3	tomm34	ENSDARG00000001557	https://zfin.org/ZDB-GENE-030131-2081	translocase of outer mitochondrial membrane 34 [Source:ZFIN;Acc:ZDB-GENE-030131-2081]
9.18803e-34	0.784337	0.636	0.2	1.27695e-29	3	psmd3	ENSDARG00000018124	https://zfin.org/ZDB-GENE-040426-1444	proteasome 26S subunit, non-ATPase 3 [Source:ZFIN;Acc:ZDB-GENE-040426-1444]
1.4505e-33	0.969343	0.856	0.536	2.01591e-29	3	seta	ENSDARG00000031495	https://zfin.org/ZDB-GENE-030131-2221	SET translocation (myeloid leukemia-associated) A [Source:ZFIN;Acc:ZDB-GENE-030131-2221]
1.58238e-33	0.720899	0.394	0.081	2.1992e-29	3	lmnb1	ENSDARG00000044299	https://zfin.org/ZDB-GENE-020424-2	lamin B1 [Source:ZFIN;Acc:ZDB-GENE-020424-2]
2.07422e-33	0.85438	0.765	0.321	2.88275e-29	3	ilf2	ENSDARG00000014591	https://zfin.org/ZDB-GENE-040426-2345	interleukin enhancer binding factor 2 [Source:ZFIN;Acc:ZDB-GENE-040426-2345]
3.83887e-33	0.333451	0.152	0.012	5.33527e-29	3	flvcr1	ENSDARG00000031587	https://zfin.org/ZDB-GENE-041014-359	feline leukemia virus subgroup C cellular receptor 1 [Source:ZFIN;Acc:ZDB-GENE-041014-359]
4.43111e-33	0.275404	0.136	0.009	6.15836e-29	3	sh3kbp1	ENSDARG00000075853	https://zfin.org/ZDB-GENE-091204-186	SH3-domain kinase binding protein 1 [Source:ZFIN;Acc:ZDB-GENE-091204-186]
4.61162e-33	0.452395	0.182	0.017	6.40923e-29	3	knstrn	ENSDARG00000074379	https://zfin.org/ZDB-GENE-081022-187	kinetochore-localized astrin/SPAG5 binding protein [Source:ZFIN;Acc:ZDB-GENE-081022-187]
4.91871e-33	0.868549	0.902	0.534	6.83602e-29	3	srsf3b	ENSDARG00000059360	https://zfin.org/ZDB-GENE-071005-2	serine/arginine-rich splicing factor 3b [Source:ZFIN;Acc:ZDB-GENE-071005-2]
8.01121e-33	0.581213	0.235	0.03	1.1134e-28	3	hk1	ENSDARG00000039452	https://zfin.org/ZDB-GENE-040426-2848	hexokinase 1 [Source:ZFIN;Acc:ZDB-GENE-040426-2848]
1.02984e-32	0.863377	0.765	0.306	1.43127e-28	3	psmd13	ENSDARG00000016239	https://zfin.org/ZDB-GENE-040426-1004	proteasome 26S subunit, non-ATPase 13 [Source:ZFIN;Acc:ZDB-GENE-040426-1004]
1.16967e-32	0.838224	0.879	0.471	1.62561e-28	3	psma1	ENSDARG00000101560	https://zfin.org/ZDB-GENE-040801-15	proteasome subunit alpha 1 [Source:ZFIN;Acc:ZDB-GENE-040801-15]
1.62363e-32	0.595127	0.379	0.075	2.25651e-28	3	thop1	ENSDARG00000013776	https://zfin.org/ZDB-GENE-040718-47	thimet oligopeptidase 1 [Source:ZFIN;Acc:ZDB-GENE-040718-47]
1.74669e-32	0.726187	0.659	0.216	2.42755e-28	3	txnl4a	ENSDARG00000036190	https://zfin.org/ZDB-GENE-041010-25	thioredoxin-like 4A [Source:ZFIN;Acc:ZDB-GENE-041010-25]
2.65211e-32	0.68754	0.705	0.238	3.6859e-28	3	psmd6	ENSDARG00000070674	https://zfin.org/ZDB-GENE-040426-1038	proteasome 26S subunit, non-ATPase 6 [Source:ZFIN;Acc:ZDB-GENE-040426-1038]
3.01273e-32	0.801958	0.848	0.369	4.18709e-28	3	clta	ENSDARG00000045618	https://zfin.org/ZDB-GENE-040426-1986	clathrin, light chain A [Source:ZFIN;Acc:ZDB-GENE-040426-1986]
3.38067e-32	0.795847	0.924	0.66	4.69846e-28	3	khdrbs1a	ENSDARG00000052856	https://zfin.org/ZDB-GENE-000210-25	KH domain containing, RNA binding, signal transduction associated 1a [Source:ZFIN;Acc:ZDB-GENE-000210-25]
3.52481e-32	0.797584	0.758	0.287	4.89878e-28	3	vcp	ENSDARG00000020008	https://zfin.org/ZDB-GENE-030131-5408	valosin containing protein [Source:ZFIN;Acc:ZDB-GENE-030131-5408]
3.87458e-32	-1.44064	0.576	0.834	5.38489e-28	3	sox21a	ENSDARG00000031664	https://zfin.org/ZDB-GENE-990715-6	SRY (sex determining region Y)-box 21a [Source:ZFIN;Acc:ZDB-GENE-990715-6]
8.41952e-32	-1.17673	0.508	0.821	1.17015e-27	3	xbp1	ENSDARG00000035622	https://zfin.org/ZDB-GENE-011210-2	X-box binding protein 1 [Source:ZFIN;Acc:ZDB-GENE-011210-2]
1.03519e-31	0.852838	0.682	0.245	1.4387e-27	3	stmn1a	ENSDARG00000004169	https://zfin.org/ZDB-GENE-031006-14	stathmin 1a [Source:ZFIN;Acc:ZDB-GENE-031006-14]
1.1596e-31	0.369934	1	1	1.61161e-27	3	RPL41	ENSDARG00000092807	https://zfin.org/ZDB-GENE-030131-7528	si:dkey-151g10.6 [Source:ZFIN;Acc:ZDB-GENE-030131-7528]
1.4367e-31	0.31422	0.144	0.011	1.99673e-27	3	si:ch211-244o22.2	ENSDARG00000068759	https://zfin.org/ZDB-GENE-030131-3271	si:ch211-244o22.2 [Source:ZFIN;Acc:ZDB-GENE-030131-3271]
2.27484e-31	-1.39965	0.326	0.735	3.16157e-27	3	soul2	ENSDARG00000039499	https://zfin.org/ZDB-GENE-030131-2524	heme-binding protein soul2 [Source:ZFIN;Acc:ZDB-GENE-030131-2524]
2.38883e-31	0.816357	0.803	0.358	3.31999e-27	3	ddx39ab	ENSDARG00000015111	https://zfin.org/ZDB-GENE-040426-2902	DEAD (Asp-Glu-Ala-Asp) box polypeptide 39Ab [Source:ZFIN;Acc:ZDB-GENE-040426-2902]
2.49192e-31	0.65974	0.545	0.154	3.46326e-27	3	psmc3	ENSDARG00000007141	https://zfin.org/ZDB-GENE-030131-666	proteasome 26S subunit, ATPase 3 [Source:ZFIN;Acc:ZDB-GENE-030131-666]
2.7832e-31	0.455522	0.992	0.973	3.86809e-27	3	rps9	ENSDARG00000011405	https://zfin.org/ZDB-GENE-010724-15	ribosomal protein S9 [Source:ZFIN;Acc:ZDB-GENE-010724-15]
2.89863e-31	0.473947	0.212	0.026	4.02852e-27	3	si:ch1073-416d2.4	ENSDARG00000101867	https://zfin.org/ZDB-GENE-131121-564	si:ch1073-416d2.4 [Source:ZFIN;Acc:ZDB-GENE-131121-564]
3.20171e-31	0.757374	0.742	0.286	4.44973e-27	3	cct3	ENSDARG00000016173	https://zfin.org/ZDB-GENE-020419-5	chaperonin containing TCP1, subunit 3 (gamma) [Source:ZFIN;Acc:ZDB-GENE-020419-5]
3.98904e-31	0.751358	0.712	0.262	5.54396e-27	3	psmd14	ENSDARG00000063100	https://zfin.org/ZDB-GENE-070410-56	proteasome 26S subunit, non-ATPase 14 [Source:ZFIN;Acc:ZDB-GENE-070410-56]
4.25973e-31	0.447795	1	0.98	5.92017e-27	3	rplp2l	ENSDARG00000011201	https://zfin.org/ZDB-GENE-070327-2	ribosomal protein, large P2, like [Source:ZFIN;Acc:ZDB-GENE-070327-2]
4.44383e-31	0.832225	0.818	0.358	6.17603e-27	3	ptbp1b	ENSDARG00000031907	https://zfin.org/ZDB-GENE-030131-9796	polypyrimidine tract binding protein 1b [Source:ZFIN;Acc:ZDB-GENE-030131-9796]
5.1651e-31	-1.69291	0.098	0.632	7.17845e-27	3	CR847847.1	ENSDARG00000087096	https://zfin.org/
6.12797e-31	0.406995	0.144	0.011	8.51665e-27	3	aurka	ENSDARG00000012485	https://zfin.org/ZDB-GENE-040801-161	aurora kinase A [Source:ZFIN;Acc:ZDB-GENE-040801-161]
7.72341e-31	0.718084	0.447	0.111	1.0734e-26	3	chchd10	ENSDARG00000010717	https://zfin.org/ZDB-GENE-040426-1753	coiled-coil-helix-coiled-coil-helix domain containing 10 [Source:ZFIN;Acc:ZDB-GENE-040426-1753]
1.25753e-30	0.727188	0.227	0.031	1.74772e-26	3	plk1	ENSDARG00000058471	https://zfin.org/ZDB-GENE-021115-7	polo-like kinase 1 (Drosophila) [Source:ZFIN;Acc:ZDB-GENE-021115-7]
1.45556e-30	-2.11508	0.477	0.762	2.02293e-26	3	cbln20	ENSDARG00000087476	https://zfin.org/ZDB-GENE-111109-2	cerebellin 20 [Source:ZFIN;Acc:ZDB-GENE-111109-2]
1.49145e-30	0.742782	0.795	0.338	2.07282e-26	3	cct4	ENSDARG00000013475	https://zfin.org/ZDB-GENE-040426-1421	chaperonin containing TCP1, subunit 4 (delta) [Source:ZFIN;Acc:ZDB-GENE-040426-1421]
5.1749e-30	-1.1479	0.826	0.887	7.19208e-26	3	si:ch211-195b11.3	ENSDARG00000100582	https://zfin.org/ZDB-GENE-141222-6	si:ch211-195b11.3 [Source:ZFIN;Acc:ZDB-GENE-141222-6]
5.88118e-30	0.761843	0.553	0.168	8.17367e-26	3	znf395	ENSDARG00000006672	https://zfin.org/ZDB-GENE-031002-50	zinc finger protein 395 [Source:ZFIN;Acc:ZDB-GENE-031002-50]
6.27215e-30	0.567118	0.462	0.115	8.71703e-26	3	pgd	ENSDARG00000015343	https://zfin.org/ZDB-GENE-040426-2807	phosphogluconate dehydrogenase [Source:ZFIN;Acc:ZDB-GENE-040426-2807]
1.05001e-29	0.872125	0.705	0.298	1.4593e-25	3	psmc4	ENSDARG00000027099	https://zfin.org/ZDB-GENE-030131-5083	proteasome 26S subunit, ATPase 4 [Source:ZFIN;Acc:ZDB-GENE-030131-5083]
1.104e-29	0.471865	0.318	0.058	1.53434e-25	3	si:ch211-275j6.5	ENSDARG00000097803	https://zfin.org/ZDB-GENE-130109-1	si:ch211-275j6.5 [Source:ZFIN;Acc:ZDB-GENE-130109-1]
1.11471e-29	0.649208	0.5	0.137	1.54923e-25	3	mrpl20	ENSDARG00000090462	https://zfin.org/ZDB-GENE-030131-5299	mitochondrial ribosomal protein L20 [Source:ZFIN;Acc:ZDB-GENE-030131-5299]
1.58688e-29	0.603782	0.227	0.032	2.20545e-25	3	dlgap5	ENSDARG00000045167	https://zfin.org/ZDB-GENE-040912-160	discs, large (Drosophila) homolog-associated protein 5 [Source:ZFIN;Acc:ZDB-GENE-040912-160]
1.69041e-29	-0.882964	0.803	0.906	2.34934e-25	3	eef1da	ENSDARG00000102291	https://zfin.org/ZDB-GENE-040426-2740	eukaryotic translation elongation factor 1 delta a (guanine nucleotide exchange protein) [Source:ZFIN;Acc:ZDB-GENE-040426-2740]
2.05772e-29	0.749311	0.758	0.311	2.85982e-25	3	psmc5	ENSDARG00000015315	https://zfin.org/ZDB-GENE-030131-6547	proteasome 26S subunit, ATPase 5 [Source:ZFIN;Acc:ZDB-GENE-030131-6547]
2.18148e-29	0.810098	0.833	0.425	3.03182e-25	3	psma8	ENSDARG00000010965	https://zfin.org/ZDB-GENE-040426-2194	proteasome subunit alpha 8 [Source:ZFIN;Acc:ZDB-GENE-040426-2194]
2.37047e-29	-1.39892	0.242	0.685	3.29448e-25	3	klf17	ENSDARG00000038792	https://zfin.org/ZDB-GENE-010129-1	Kruppel-like factor 17 [Source:ZFIN;Acc:ZDB-GENE-010129-1]
2.67029e-29	0.389884	0.22	0.029	3.71117e-25	3	spc25	ENSDARG00000078433	https://zfin.org/ZDB-GENE-060810-13	SPC25, NDC80 kinetochore complex component, homolog (S. cerevisiae) [Source:ZFIN;Acc:ZDB-GENE-060810-13]
2.77725e-29	0.622435	0.402	0.093	3.85983e-25	3	smarcb1b	ENSDARG00000011594	https://zfin.org/ZDB-GENE-991008-16	SWI/SNF related, matrix associated, actin dependent regulator of chromatin, subfamily b, member 1b [Source:ZFIN;Acc:ZDB-GENE-991008-16]
3.33361e-29	0.736995	0.848	0.412	4.63305e-25	3	ddx39aa	ENSDARG00000006225	https://zfin.org/ZDB-GENE-030131-4275	DEAD (Asp-Glu-Ala-Asp) box polypeptide 39Aa [Source:ZFIN;Acc:ZDB-GENE-030131-4275]
3.63371e-29	0.359402	0.197	0.023	5.05014e-25	3	si:dkey-66i24.7	ENSDARG00000096714	https://zfin.org/ZDB-GENE-130603-106	si:dkey-66i24.7 [Source:ZFIN;Acc:ZDB-GENE-130603-106]
3.6371e-29	1.1178	0.341	0.071	5.05484e-25	3	ube2c	ENSDARG00000101618	https://zfin.org/ZDB-GENE-051030-48	ubiquitin-conjugating enzyme E2C [Source:ZFIN;Acc:ZDB-GENE-051030-48]
4.09015e-29	0.623869	0.303	0.056	5.68449e-25	3	rhbdf1a	ENSDARG00000036541	https://zfin.org/ZDB-GENE-040704-75	rhomboid 5 homolog 1a (Drosophila) [Source:ZFIN;Acc:ZDB-GENE-040704-75]
6.21969e-29	0.70545	0.932	0.774	8.64412e-25	3	hnrnpa0l	ENSDARG00000036161	https://zfin.org/ZDB-GENE-030131-618	heterogeneous nuclear ribonucleoprotein A0, like [Source:ZFIN;Acc:ZDB-GENE-030131-618]
7.36727e-29	0.578048	0.424	0.1	1.0239e-24	3	rtn1a	ENSDARG00000006497	https://zfin.org/ZDB-GENE-030131-2426	reticulon 1a [Source:ZFIN;Acc:ZDB-GENE-030131-2426]
8.96254e-29	0.417275	0.167	0.017	1.24561e-24	3	g2e3	ENSDARG00000001313	https://zfin.org/ZDB-GENE-030616-400	G2/M-phase specific E3 ubiquitin protein ligase [Source:ZFIN;Acc:ZDB-GENE-030616-400]
1.28583e-28	0.517184	0.22	0.03	1.78704e-24	3	spc24	ENSDARG00000093622	https://zfin.org/ZDB-GENE-050522-456	SPC24, NDC80 kinetochore complex component, homolog (S. cerevisiae) [Source:ZFIN;Acc:ZDB-GENE-050522-456]
1.5171e-28	-1.62268	0.356	0.72	2.10847e-24	3	spaca4l	ENSDARG00000100431	https://zfin.org/ZDB-GENE-101011-2	sperm acrosome associated 4 like [Source:ZFIN;Acc:ZDB-GENE-101011-2]
1.63543e-28	0.596315	0.364	0.08	2.27291e-24	3	psmd12	ENSDARG00000052377	https://zfin.org/ZDB-GENE-030131-617	proteasome 26S subunit, non-ATPase 12 [Source:ZFIN;Acc:ZDB-GENE-030131-617]
1.91933e-28	-1.49397	0.674	0.847	2.66749e-24	3	icn	ENSDARG00000009978	https://zfin.org/ZDB-GENE-030131-8599	ictacalcin [Source:ZFIN;Acc:ZDB-GENE-030131-8599]
2.00896e-28	0.661395	0.727	0.288	2.79205e-24	3	nudc	ENSDARG00000104837	https://zfin.org/ZDB-GENE-040426-899	nudC nuclear distribution protein [Source:ZFIN;Acc:ZDB-GENE-040426-899]
2.22669e-28	0.498359	0.159	0.016	3.09465e-24	3	ccnb3	ENSDARG00000034855	https://zfin.org/ZDB-GENE-060929-684	cyclin B3 [Source:ZFIN;Acc:ZDB-GENE-060929-684]
2.55869e-28	0.347504	0.182	0.02	3.55606e-24	3	mapre2	ENSDARG00000099943	https://zfin.org/ZDB-GENE-071004-41	microtubule-associated protein, RP/EB family, member 2 [Source:ZFIN;Acc:ZDB-GENE-071004-41]
3.71096e-28	0.534588	0.432	0.106	5.15749e-24	3	eif4e1c	ENSDARG00000012274	https://zfin.org/ZDB-GENE-050417-398	eukaryotic translation initiation factor 4E family member 1c [Source:ZFIN;Acc:ZDB-GENE-050417-398]
4.61666e-28	0.514513	1	0.925	6.41624e-24	3	hsp90ab1	ENSDARG00000029150	https://zfin.org/ZDB-GENE-990415-95	heat shock protein 90, alpha (cytosolic), class B member 1 [Source:ZFIN;Acc:ZDB-GENE-990415-95]
5.19596e-28	0.736092	0.477	0.133	7.22134e-24	3	rtca	ENSDARG00000002215	https://zfin.org/ZDB-GENE-030131-9687	RNA 3'-terminal phosphate cyclase [Source:ZFIN;Acc:ZDB-GENE-030131-9687]
8.63432e-28	0.256704	0.114	0.007	1.2e-23	3	prc1b	ENSDARG00000005993	https://zfin.org/ZDB-GENE-040426-777	protein regulator of cytokinesis 1b [Source:ZFIN;Acc:ZDB-GENE-040426-777]
8.99285e-28	0.426203	0.242	0.038	1.24983e-23	3	odc1	ENSDARG00000007377	https://zfin.org/ZDB-GENE-010816-1	ornithine decarboxylase 1 [Source:ZFIN;Acc:ZDB-GENE-010816-1]
1.01649e-27	0.520155	0.447	0.113	1.41272e-23	3	snrnp40	ENSDARG00000023160	https://zfin.org/ZDB-GENE-040426-978	small nuclear ribonucleoprotein 40 (U5) [Source:ZFIN;Acc:ZDB-GENE-040426-978]
1.04007e-27	0.698423	0.674	0.244	1.44549e-23	3	marcksb	ENSDARG00000008803	https://zfin.org/ZDB-GENE-030131-1921	myristoylated alanine-rich protein kinase C substrate b [Source:ZFIN;Acc:ZDB-GENE-030131-1921]
1.3259e-27	0.63221	0.621	0.212	1.84274e-23	3	cct6a	ENSDARG00000021252	https://zfin.org/ZDB-GENE-011018-2	chaperonin containing TCP1, subunit 6A (zeta 1) [Source:ZFIN;Acc:ZDB-GENE-011018-2]
1.44032e-27	0.628126	0.53	0.158	2.00176e-23	3	snrpa	ENSDARG00000018890	https://zfin.org/ZDB-GENE-030131-2841	small nuclear ribonucleoprotein polypeptide A [Source:ZFIN;Acc:ZDB-GENE-030131-2841]
1.52596e-27	0.363107	0.136	0.012	2.12078e-23	3	setd8b	ENSDARG00000104114	https://zfin.org/ZDB-GENE-071004-17	SET domain containing (lysine methyltransferase) 8b [Source:ZFIN;Acc:ZDB-GENE-071004-17]
1.64324e-27	0.811978	0.977	0.749	2.28377e-23	3	dynll1	ENSDARG00000058454	https://zfin.org/ZDB-GENE-040426-1961	dynein, light chain, LC8-type 1 [Source:ZFIN;Acc:ZDB-GENE-040426-1961]
1.64446e-27	0.656272	0.508	0.149	2.28547e-23	3	psmc1b	ENSDARG00000043561	https://zfin.org/ZDB-GENE-040625-69	proteasome 26S subunit, ATPase 1b [Source:ZFIN;Acc:ZDB-GENE-040625-69]
1.89916e-27	0.731035	0.886	0.475	2.63945e-23	3	snrpd2	ENSDARG00000040440	https://zfin.org/ZDB-GENE-040914-10	small nuclear ribonucleoprotein D2 polypeptide [Source:ZFIN;Acc:ZDB-GENE-040914-10]
1.99985e-27	0.671093	0.667	0.244	2.77939e-23	3	rnasekb	ENSDARG00000104458	https://zfin.org/ZDB-GENE-060825-160	ribonuclease, RNase K b [Source:ZFIN;Acc:ZDB-GENE-060825-160]
2.56938e-27	0.510891	0.386	0.09	3.57093e-23	3	fdx1l	ENSDARG00000052190	https://zfin.org/ZDB-GENE-060929-1046	ferredoxin 1-like [Source:ZFIN;Acc:ZDB-GENE-060929-1046]
2.92511e-27	0.450545	0.356	0.078	4.06532e-23	3	gclm	ENSDARG00000018953	https://zfin.org/ZDB-GENE-030131-5906	glutamate-cysteine ligase, modifier subunit [Source:ZFIN;Acc:ZDB-GENE-030131-5906]
4.02644e-27	0.578002	0.311	0.062	5.59594e-23	3	c10h21orf59	ENSDARG00000035332	https://zfin.org/ZDB-GENE-040930-8	c10h21orf59 homolog (H. sapiens) [Source:ZFIN;Acc:ZDB-GENE-040930-8]
4.52471e-27	-1.44356	0.182	0.634	6.28844e-23	3	sparc	ENSDARG00000019353	https://zfin.org/ZDB-GENE-030131-9	secreted protein, acidic, cysteine-rich (osteonectin) [Source:ZFIN;Acc:ZDB-GENE-030131-9]
4.5255e-27	0.709347	0.917	0.56	6.28954e-23	3	sumo3a	ENSDARG00000028119	https://zfin.org/ZDB-GENE-040426-2133	small ubiquitin-like modifier 3a [Source:ZFIN;Acc:ZDB-GENE-040426-2133]
4.6297e-27	0.422754	0.25	0.041	6.43435e-23	3	rimkla	ENSDARG00000016830	https://zfin.org/ZDB-GENE-040912-20	ribosomal modification protein rimK-like family member A [Source:ZFIN;Acc:ZDB-GENE-040912-20]
4.77353e-27	0.725766	0.621	0.228	6.63425e-23	3	reep3b	ENSDARG00000004160	https://zfin.org/ZDB-GENE-040426-730	receptor accessory protein 3b [Source:ZFIN;Acc:ZDB-GENE-040426-730]
5.08954e-27	-1.06367	0.689	0.864	7.07345e-23	3	sdc4	ENSDARG00000059906	https://zfin.org/ZDB-GENE-061111-1	syndecan 4 [Source:ZFIN;Acc:ZDB-GENE-061111-1]
5.11749e-27	0.79632	0.894	0.595	7.11229e-23	3	hnrnpa0b	ENSDARG00000036162	https://zfin.org/ZDB-GENE-030131-6154	heterogeneous nuclear ribonucleoprotein A0b [Source:ZFIN;Acc:ZDB-GENE-030131-6154]
6.31343e-27	0.652672	0.447	0.122	8.77441e-23	3	pkp3b	ENSDARG00000079438	https://zfin.org/ZDB-GENE-130530-870	plakophilin 3b [Source:ZFIN;Acc:ZDB-GENE-130530-870]
7.14959e-27	0.313233	0.136	0.012	9.93651e-23	3	si:dkey-272j9.1	ENSDARG00000092021	https://zfin.org/ZDB-GENE-070912-492	si:dkey-272j9.1 [Source:ZFIN;Acc:ZDB-GENE-070912-492]
8.5203e-27	-2.28909	0.591	0.781	1.18415e-22	3	si:ch211-229d2.5	ENSDARG00000079119	https://zfin.org/ZDB-GENE-121214-200	si:ch211-229d2.5 [Source:ZFIN;Acc:ZDB-GENE-121214-200]
9.1845e-27	0.722303	0.689	0.281	1.27646e-22	3	cct7	ENSDARG00000007385	https://zfin.org/ZDB-GENE-020419-7	chaperonin containing TCP1, subunit 7 (eta) [Source:ZFIN;Acc:ZDB-GENE-020419-7]
9.79571e-27	-1.25776	0.341	0.701	1.36141e-22	3	fxyd6l	ENSDARG00000097057	https://zfin.org/ZDB-GENE-071205-8	FXYD domain containing ion transport regulator 6 like [Source:ZFIN;Acc:ZDB-GENE-071205-8]
1.36545e-26	0.487039	0.311	0.062	1.89771e-22	3	sae1	ENSDARG00000010487	https://zfin.org/ZDB-GENE-040625-21	SUMO1 activating enzyme subunit 1 [Source:ZFIN;Acc:ZDB-GENE-040625-21]
1.50399e-26	0.622784	0.955	0.773	2.09024e-22	3	cox7b	ENSDARG00000098250	https://zfin.org/ZDB-GENE-030131-6602	cytochrome c oxidase subunit VIIb [Source:ZFIN;Acc:ZDB-GENE-030131-6602]
1.59103e-26	0.674147	0.909	0.528	2.21121e-22	3	cox7a2a	ENSDARG00000053217	https://zfin.org/ZDB-GENE-050522-153	cytochrome c oxidase subunit VIIa polypeptide 2a (liver) [Source:ZFIN;Acc:ZDB-GENE-050522-153]
1.7824e-26	0.637453	0.462	0.128	2.47718e-22	3	tardbp	ENSDARG00000040031	https://zfin.org/ZDB-GENE-030131-3777	TAR DNA binding protein [Source:ZFIN;Acc:ZDB-GENE-030131-3777]
1.91604e-26	0.688152	0.644	0.235	2.66291e-22	3	dbi	ENSDARG00000026369	https://zfin.org/ZDB-GENE-040426-1861	diazepam binding inhibitor (GABA receptor modulator, acyl-CoA binding protein) [Source:ZFIN;Acc:ZDB-GENE-040426-1861]
2.62676e-26	0.739671	0.856	0.443	3.65066e-22	3	syncrip	ENSDARG00000040184	https://zfin.org/ZDB-GENE-030131-4862	synaptotagmin binding, cytoplasmic RNA interacting protein [Source:ZFIN;Acc:ZDB-GENE-030131-4862]
3.18304e-26	0.630581	0.97	0.641	4.42379e-22	3	tma7	ENSDARG00000071670	https://zfin.org/ZDB-GENE-061027-176	translation machinery associated 7 homolog [Source:ZFIN;Acc:ZDB-GENE-061027-176]
4.7153e-26	-1.09014	0.561	0.802	6.55332e-22	3	dap1b.1	ENSDARG00000086842	https://zfin.org/ZDB-GENE-000511-4	death associated protein 1b [Source:ZFIN;Acc:ZDB-GENE-000511-4]
4.89011e-26	0.27066	0.121	0.01	6.79627e-22	3	spdl1	ENSDARG00000103996	https://zfin.org/ZDB-GENE-070928-7	spindle apparatus coiled-coil protein 1 [Source:ZFIN;Acc:ZDB-GENE-070928-7]
6.48153e-26	-1.56862	0.197	0.619	9.00803e-22	3	pabpc1b	ENSDARG00000021140	https://zfin.org/ZDB-GENE-050308-1	poly A binding protein, cytoplasmic 1 b [Source:ZFIN;Acc:ZDB-GENE-050308-1]
6.83059e-26	0.701383	0.735	0.315	9.49316e-22	3	psma2	ENSDARG00000040121	https://zfin.org/ZDB-GENE-050522-479	proteasome subunit alpha 2 [Source:ZFIN;Acc:ZDB-GENE-050522-479]
9.56106e-26	0.569442	0.553	0.169	1.3288e-21	3	si:ch211-156b7.4	ENSDARG00000101707	https://zfin.org/ZDB-GENE-141212-376	si:ch211-156b7.4 [Source:ZFIN;Acc:ZDB-GENE-141212-376]
9.81452e-26	0.501283	0.227	0.036	1.36402e-21	3	lrriq1	ENSDARG00000093781	https://zfin.org/ZDB-GENE-050419-235	leucine-rich repeats and IQ motif containing 1 [Source:ZFIN;Acc:ZDB-GENE-050419-235]
1.01341e-25	0.264922	0.159	0.017	1.40843e-21	3	cerkl	ENSDARG00000079397	https://zfin.org/ZDB-GENE-070410-38	ceramide kinase-like [Source:ZFIN;Acc:ZDB-GENE-070410-38]
1.59418e-25	-2.42496	0.712	0.853	2.2156e-21	3	si:dkeyp-110c7.4	ENSDARG00000100476	https://zfin.org/ZDB-GENE-070705-532	si:dkeyp-110c7.4 [Source:ZFIN;Acc:ZDB-GENE-070705-532]
1.82451e-25	0.459011	0.167	0.02	2.53571e-21	3	casz1	ENSDARG00000037030	https://zfin.org/ZDB-GENE-060130-108	castor zinc finger 1 [Source:ZFIN;Acc:ZDB-GENE-060130-108]
1.90048e-25	0.707596	0.773	0.353	2.64129e-21	3	lsm6	ENSDARG00000036995	https://zfin.org/ZDB-GENE-040625-50	LSM6 homolog, U6 small nuclear RNA and mRNA degradation associated [Source:ZFIN;Acc:ZDB-GENE-040625-50]
1.90905e-25	0.75854	0.644	0.249	2.6532e-21	3	si:ch211-288g17.3	ENSDARG00000070959	https://zfin.org/ZDB-GENE-030131-461	si:ch211-288g17.3 [Source:ZFIN;Acc:ZDB-GENE-030131-461]
2.17064e-25	0.625374	0.742	0.291	3.01675e-21	3	eny2	ENSDARG00000070046	https://zfin.org/ZDB-GENE-040718-124	enhancer of yellow 2 homolog (Drosophila) [Source:ZFIN;Acc:ZDB-GENE-040718-124]
2.28287e-25	0.609978	0.879	0.46	3.17274e-21	3	snrpb	ENSDARG00000011125	https://zfin.org/ZDB-GENE-040426-1819	small nuclear ribonucleoprotein polypeptides B and B1 [Source:ZFIN;Acc:ZDB-GENE-040426-1819]
2.53995e-25	0.666098	0.598	0.219	3.53003e-21	3	psmd4b	ENSDARG00000023279	https://zfin.org/ZDB-GENE-050417-96	proteasome 26S subunit, non-ATPase 4b [Source:ZFIN;Acc:ZDB-GENE-050417-96]
2.6413e-25	-1.22577	0.235	0.659	3.67088e-21	3	zgc:175088	ENSDARG00000099306	https://zfin.org/ZDB-GENE-080204-124	zgc:175088 [Source:ZFIN;Acc:ZDB-GENE-080204-124]
3.00409e-25	0.312977	0.159	0.018	4.17508e-21	3	cldna	ENSDARG00000069888	https://zfin.org/ZDB-GENE-010328-1	claudin a [Source:ZFIN;Acc:ZDB-GENE-010328-1]
3.76752e-25	0.41521	0.159	0.018	5.2361e-21	3	mapk15	ENSDARG00000101987	https://zfin.org/
3.79349e-25	-1.28797	0.508	0.767	5.27219e-21	3	krt15	ENSDARG00000036840	https://zfin.org/ZDB-GENE-040426-2931	keratin 15 [Source:ZFIN;Acc:ZDB-GENE-040426-2931]
5.30027e-25	0.29404	0.121	0.01	7.36632e-21	3	cap2	ENSDARG00000104478	https://zfin.org/ZDB-GENE-040426-1758	CAP, adenylate cyclase-associated protein, 2 (yeast) [Source:ZFIN;Acc:ZDB-GENE-040426-1758]
5.68163e-25	0.5751	0.485	0.143	7.89632e-21	3	abcf1	ENSDARG00000031795	https://zfin.org/ZDB-GENE-050517-31	ATP-binding cassette, sub-family F (GCN20), member 1 [Source:ZFIN;Acc:ZDB-GENE-050517-31]
5.69463e-25	0.893159	0.515	0.165	7.9144e-21	3	dla	ENSDARG00000010791	https://zfin.org/ZDB-GENE-980526-29	deltaA [Source:ZFIN;Acc:ZDB-GENE-980526-29]
6.471e-25	0.705746	0.773	0.353	8.99339e-21	3	snrpg	ENSDARG00000099667	https://zfin.org/ZDB-GENE-040912-105	small nuclear ribonucleoprotein polypeptide G [Source:ZFIN;Acc:ZDB-GENE-040912-105]
6.94964e-25	0.488465	0.295	0.061	9.65861e-21	3	sms	ENSDARG00000008155	https://zfin.org/ZDB-GENE-040625-150	spermine synthase [Source:ZFIN;Acc:ZDB-GENE-040625-150]
8.56722e-25	0.337213	0.144	0.015	1.19067e-20	3	cx28.8	ENSDARG00000071042	https://zfin.org/ZDB-GENE-050616-1	connexin 28.8 [Source:ZFIN;Acc:ZDB-GENE-050616-1]
1.03871e-24	0.627085	0.758	0.323	1.4436e-20	3	hspe1	ENSDARG00000056167	https://zfin.org/ZDB-GENE-000906-2	heat shock 10 protein 1 [Source:ZFIN;Acc:ZDB-GENE-000906-2]
1.14518e-24	0.536468	0.242	0.042	1.59157e-20	3	nfe2l3	ENSDARG00000019810	https://zfin.org/ZDB-GENE-040426-2334	nuclear factor, erythroid 2-like 3 [Source:ZFIN;Acc:ZDB-GENE-040426-2334]
1.1882e-24	-1.32928	0.22	0.624	1.65136e-20	3	zfp36l1b	ENSDARG00000021443	https://zfin.org/ZDB-GENE-030131-2391	zinc finger protein 36, C3H type-like 1b [Source:ZFIN;Acc:ZDB-GENE-030131-2391]
1.38605e-24	-1.13218	0.447	0.725	1.92633e-20	3	cfl1l	ENSDARG00000012972	https://zfin.org/ZDB-GENE-040426-2770	cofilin 1 (non-muscle), like [Source:ZFIN;Acc:ZDB-GENE-040426-2770]
1.63949e-24	-0.671847	0.932	0.969	2.27857e-20	3	cldnb	ENSDARG00000009544	https://zfin.org/ZDB-GENE-010328-2	claudin b [Source:ZFIN;Acc:ZDB-GENE-010328-2]
1.7198e-24	0.293313	0.144	0.015	2.39018e-20	3	cep55l	ENSDARG00000102349	https://zfin.org/ZDB-GENE-050522-222	centrosomal protein 55 like [Source:ZFIN;Acc:ZDB-GENE-050522-222]
1.73697e-24	0.763698	0.818	0.481	2.41404e-20	3	rbm4.3	ENSDARG00000022129	https://zfin.org/ZDB-GENE-040426-1938	RNA binding motif protein 4.3 [Source:ZFIN;Acc:ZDB-GENE-040426-1938]
1.9397e-24	0.640696	0.909	0.46	2.6958e-20	3	snrpd1	ENSDARG00000011648	https://zfin.org/ZDB-GENE-020419-14	small nuclear ribonucleoprotein D1 polypeptide [Source:ZFIN;Acc:ZDB-GENE-020419-14]
2.02633e-24	0.547042	0.515	0.161	2.81619e-20	3	srsf10b	ENSDARG00000086411	https://zfin.org/ZDB-GENE-040426-1415	serine/arginine-rich splicing factor 10b [Source:ZFIN;Acc:ZDB-GENE-040426-1415]
2.06838e-24	0.28886	0.129	0.012	2.87464e-20	3	bves	ENSDARG00000058548	https://zfin.org/ZDB-GENE-040624-11	blood vessel epicardial substance [Source:ZFIN;Acc:ZDB-GENE-040624-11]
2.39262e-24	0.362031	0.182	0.025	3.32526e-20	3	atp6v0cb	ENSDARG00000036577	https://zfin.org/ZDB-GENE-030131-4127	ATPase, H+ transporting, lysosomal, V0 subunit cb [Source:ZFIN;Acc:ZDB-GENE-030131-4127]
2.48063e-24	0.61093	0.402	0.108	3.44758e-20	3	zgc:77816	ENSDARG00000011376	https://zfin.org/ZDB-GENE-040426-1884	zgc:77816 [Source:ZFIN;Acc:ZDB-GENE-040426-1884]
3.14873e-24	0.632486	0.894	0.592	4.37611e-20	3	shfm1	ENSDARG00000027899	https://zfin.org/ZDB-GENE-030131-988	split hand/foot malformation (ectrodactyly) type 1 [Source:ZFIN;Acc:ZDB-GENE-030131-988]
3.23724e-24	0.596151	0.492	0.149	4.49912e-20	3	ruvbl1	ENSDARG00000002591	https://zfin.org/ZDB-GENE-030109-2	RuvB-like AAA ATPase 1 [Source:ZFIN;Acc:ZDB-GENE-030109-2]
3.4119e-24	0.462767	0.28	0.056	4.74186e-20	3	hspa4a	ENSDARG00000004754	https://zfin.org/ZDB-GENE-040426-2832	heat shock protein 4a [Source:ZFIN;Acc:ZDB-GENE-040426-2832]
3.44316e-24	0.412939	0.242	0.043	4.78531e-20	3	tomm40l	ENSDARG00000036721	https://zfin.org/ZDB-GENE-040426-2319	translocase of outer mitochondrial membrane 40 homolog, like [Source:ZFIN;Acc:ZDB-GENE-040426-2319]
4.2776e-24	0.645144	0.371	0.093	5.94501e-20	3	meig1	ENSDARG00000045705	https://zfin.org/ZDB-GENE-050320-33	meiosis/spermiogenesis associated 1 [Source:ZFIN;Acc:ZDB-GENE-050320-33]
4.55975e-24	0.602597	0.644	0.241	6.33714e-20	3	srsf9	ENSDARG00000008097	https://zfin.org/ZDB-GENE-040426-2397	serine/arginine-rich splicing factor 9 [Source:ZFIN;Acc:ZDB-GENE-040426-2397]
5.35011e-24	0.654584	0.591	0.207	7.43558e-20	3	alyref	ENSDARG00000077732	https://zfin.org/ZDB-GENE-070928-29	Aly/REF export factor [Source:ZFIN;Acc:ZDB-GENE-070928-29]
6.58694e-24	1.2769	0.212	0.035	9.15453e-20	3	hes2.2	ENSDARG00000068168	https://zfin.org/ZDB-GENE-060825-55	hes family bHLH transcription factor 2, tandem duplicate 2 [Source:ZFIN;Acc:ZDB-GENE-060825-55]
7.47072e-24	0.644122	0.856	0.517	1.03828e-19	3	setb	ENSDARG00000003920	https://zfin.org/ZDB-GENE-030131-433	SET translocation (myeloid leukemia-associated) B [Source:ZFIN;Acc:ZDB-GENE-030131-433]
9.38165e-24	0.502023	0.992	0.921	1.30386e-19	3	ybx1	ENSDARG00000004757	https://zfin.org/ZDB-GENE-000629-3	Y box binding protein 1 [Source:ZFIN;Acc:ZDB-GENE-000629-3]
1.02636e-23	0.533439	0.47	0.138	1.42644e-19	3	mrpl14	ENSDARG00000068886	https://zfin.org/ZDB-GENE-040426-1066	mitochondrial ribosomal protein L14 [Source:ZFIN;Acc:ZDB-GENE-040426-1066]
1.08348e-23	0.507039	0.553	0.18	1.50582e-19	3	srsf3a	ENSDARG00000100815	https://zfin.org/ZDB-GENE-030616-631	serine/arginine-rich splicing factor 3a [Source:ZFIN;Acc:ZDB-GENE-030616-631]
1.25632e-23	0.412333	0.189	0.027	1.74604e-19	3	CABZ01058261.1	ENSDARG00000099194	https://zfin.org/
1.27344e-23	0.3374	1	0.995	1.76982e-19	3	rps19	ENSDARG00000030602	https://zfin.org/ZDB-GENE-040426-1716	ribosomal protein S19 [Source:ZFIN;Acc:ZDB-GENE-040426-1716]
1.30554e-23	0.253231	0.144	0.016	1.81444e-19	3	si:dkey-265j8.3	ENSDARG00000097108	https://zfin.org/ZDB-GENE-131127-55	si:dkey-265j8.3 [Source:ZFIN;Acc:ZDB-GENE-131127-55]
1.57132e-23	-1.2846	0.167	0.588	2.18382e-19	3	calr	ENSDARG00000076290	https://zfin.org/ZDB-GENE-030131-4042	calreticulin [Source:ZFIN;Acc:ZDB-GENE-030131-4042]
1.92861e-23	-0.747989	0.811	0.92	2.68039e-19	3	si:dkey-222f2.1	ENSDARG00000043242	https://zfin.org/ZDB-GENE-050208-726	si:dkey-222f2.1 [Source:ZFIN;Acc:ZDB-GENE-050208-726]
2.21103e-23	-1.18954	0.235	0.627	3.07288e-19	3	si:dkey-87o1.2	ENSDARG00000095796	https://zfin.org/ZDB-GENE-110411-217	si:dkey-87o1.2 [Source:ZFIN;Acc:ZDB-GENE-110411-217]
2.39028e-23	0.616316	0.515	0.166	3.32201e-19	3	psmd1	ENSDARG00000003189	https://zfin.org/ZDB-GENE-040426-810	proteasome 26S subunit, non-ATPase 1 [Source:ZFIN;Acc:ZDB-GENE-040426-810]
2.42339e-23	0.29187	0.129	0.013	3.36803e-19	3	ulk1a	ENSDARG00000062518	https://zfin.org/ZDB-GENE-080723-31	unc-51 like autophagy activating kinase 1a [Source:ZFIN;Acc:ZDB-GENE-080723-31]
2.63528e-23	-1.24086	0.811	0.891	3.66251e-19	3	wu:fj16a03	ENSDARG00000100952	https://zfin.org/	wu:fj16a03 [Source:EntrezGene;Acc:335475]
2.63563e-23	0.580996	0.606	0.217	3.66299e-19	3	snrpc	ENSDARG00000009871	https://zfin.org/ZDB-GENE-020419-26	small nuclear ribonucleoprotein polypeptide C [Source:ZFIN;Acc:ZDB-GENE-020419-26]
3.46133e-23	-1.5885	0.25	0.615	4.81056e-19	3	aqp3a	ENSDARG00000003808	https://zfin.org/ZDB-GENE-040426-2826	aquaporin 3a [Source:ZFIN;Acc:ZDB-GENE-040426-2826]
4.10608e-23	0.295227	0.167	0.022	5.70663e-19	3	wdr92	ENSDARG00000037334	https://zfin.org/ZDB-GENE-050417-93	WD repeat domain 92 [Source:ZFIN;Acc:ZDB-GENE-050417-93]
5.23523e-23	0.327556	0.364	0.09	7.27592e-19	3	rrm2	ENSDARG00000020711	https://zfin.org/ZDB-GENE-990415-25	ribonucleotide reductase M2 polypeptide [Source:ZFIN;Acc:ZDB-GENE-990415-25]
6.5982e-23	0.706518	0.583	0.227	9.17018e-19	3	rpz2	ENSDARG00000091215	https://zfin.org/ZDB-GENE-030131-9071	rapunzel 2 [Source:ZFIN;Acc:ZDB-GENE-030131-9071]
7.85777e-23	0.559372	0.432	0.125	1.09207e-18	3	anapc13	ENSDARG00000078435	https://zfin.org/ZDB-GENE-091204-298	anaphase promoting complex subunit 13 [Source:ZFIN;Acc:ZDB-GENE-091204-298]
8.28591e-23	0.660435	0.697	0.307	1.15158e-18	3	smarce1	ENSDARG00000016871	https://zfin.org/ZDB-GENE-030131-967	SWI/SNF related, matrix associated, actin dependent regulator of chromatin, subfamily e, member 1 [Source:ZFIN;Acc:ZDB-GENE-030131-967]
8.51769e-23	0.40554	0.295	0.064	1.18379e-18	3	nr2f6a	ENSDARG00000003607	https://zfin.org/ZDB-GENE-030131-4362	nuclear receptor subfamily 2, group F, member 6a [Source:ZFIN;Acc:ZDB-GENE-030131-4362]
9.44496e-23	0.638434	0.598	0.224	1.31266e-18	3	zgc:110340	ENSDARG00000079497	https://zfin.org/ZDB-GENE-050320-36	zgc:110340 [Source:ZFIN;Acc:ZDB-GENE-050320-36]
1.0333e-22	0.379903	1	0.985	1.43608e-18	3	rpsa	ENSDARG00000019181	https://zfin.org/ZDB-GENE-040426-811	ribosomal protein SA [Source:ZFIN;Acc:ZDB-GENE-040426-811]
1.3291e-22	-1.33526	0.364	0.683	1.84718e-18	3	nfkbiab	ENSDARG00000007693	https://zfin.org/ZDB-GENE-030131-1819	nuclear factor of kappa light polypeptide gene enhancer in B-cells inhibitor, alpha b [Source:ZFIN;Acc:ZDB-GENE-030131-1819]
1.64411e-22	0.436727	0.182	0.026	2.28499e-18	3	cdkn1cb	ENSDARG00000104903	https://zfin.org/ZDB-GENE-131127-286	cyclin-dependent kinase inhibitor 1Cb [Source:ZFIN;Acc:ZDB-GENE-131127-286]
1.6594e-22	0.31669	0.121	0.012	2.30624e-18	3	mdkb	ENSDARG00000020708	https://zfin.org/ZDB-GENE-010131-6	midkine b [Source:ZFIN;Acc:ZDB-GENE-010131-6]
2.63858e-22	-1.22686	0.098	0.53	3.66709e-18	3	sdprb	ENSDARG00000071196	https://zfin.org/ZDB-GENE-040912-149	serum deprivation response b [Source:ZFIN;Acc:ZDB-GENE-040912-149]
3.05989e-22	0.342411	0.197	0.031	4.25264e-18	3	si:dkey-276j7.1	ENSDARG00000090872	https://zfin.org/ZDB-GENE-060720-44	si:dkey-276j7.1 [Source:ZFIN;Acc:ZDB-GENE-060720-44]
3.12381e-22	0.600671	0.78	0.372	4.34147e-18	3	phf5a	ENSDARG00000045155	https://zfin.org/ZDB-GENE-021219-3	PHD finger protein 5A [Source:ZFIN;Acc:ZDB-GENE-021219-3]
3.54591e-22	0.607819	0.939	0.645	4.9281e-18	3	atp5j2	ENSDARG00000037867	https://zfin.org/ZDB-GENE-050309-87	ATP synthase, H+ transporting, mitochondrial Fo complex, subunit F2 [Source:ZFIN;Acc:ZDB-GENE-050309-87]
3.9963e-22	0.498038	0.576	0.2	5.55406e-18	3	nedd8	ENSDARG00000007989	https://zfin.org/ZDB-GENE-030616-588	neural precursor cell expressed, developmentally down-regulated 8 [Source:ZFIN;Acc:ZDB-GENE-030616-588]
4.31518e-22	0.747877	0.818	0.52	5.99724e-18	3	oaz1b	ENSDARG00000104782	https://zfin.org/ZDB-GENE-020731-5	ornithine decarboxylase antizyme 1b [Source:ZFIN;Acc:ZDB-GENE-020731-5]
5.8954e-22	-1.35576	0.174	0.565	8.19343e-18	3	apodb	ENSDARG00000057437	https://zfin.org/ZDB-GENE-051023-8	apolipoprotein Db [Source:ZFIN;Acc:ZDB-GENE-051023-8]
6.91491e-22	0.632528	0.598	0.23	9.61035e-18	3	amer2	ENSDARG00000075222	https://zfin.org/ZDB-GENE-070719-5	APC membrane recruitment protein 2 [Source:ZFIN;Acc:ZDB-GENE-070719-5]
7.99975e-22	0.656172	0.667	0.287	1.11181e-17	3	magoh	ENSDARG00000038635	https://zfin.org/ZDB-GENE-041216-1	mago homolog, exon junction complex core component [Source:ZFIN;Acc:ZDB-GENE-041216-1]
8.2484e-22	0.532106	0.402	0.112	1.14636e-17	3	chd7	ENSDARG00000075211	https://zfin.org/ZDB-GENE-070912-179	chromodomain helicase DNA binding protein 7 [Source:ZFIN;Acc:ZDB-GENE-070912-179]
8.34341e-22	0.60104	0.455	0.143	1.15957e-17	3	tp53inp1	ENSDARG00000028017	https://zfin.org/ZDB-GENE-031018-3	tumor protein p53 inducible nuclear protein 1 [Source:ZFIN;Acc:ZDB-GENE-031018-3]
8.44246e-22	0.466264	0.402	0.111	1.17333e-17	3	rab3ip	ENSDARG00000101908	https://zfin.org/ZDB-GENE-050522-323	RAB3A interacting protein (rabin3) [Source:ZFIN;Acc:ZDB-GENE-050522-323]
8.85918e-22	0.388414	0.152	0.019	1.23125e-17	3	lrrc23	ENSDARG00000006174	https://zfin.org/ZDB-GENE-041010-153	leucine rich repeat containing 23 [Source:ZFIN;Acc:ZDB-GENE-041010-153]
1.11483e-21	-0.721057	0.818	0.904	1.54938e-17	3	glulb	ENSDARG00000100003	https://zfin.org/ZDB-GENE-030131-8417	glutamate-ammonia ligase (glutamine synthase) b [Source:ZFIN;Acc:ZDB-GENE-030131-8417]
1.38083e-21	0.530999	0.417	0.122	1.91907e-17	3	lsm1	ENSDARG00000043177	https://zfin.org/ZDB-GENE-040801-68	LSM1, U6 small nuclear RNA associated [Source:ZFIN;Acc:ZDB-GENE-040801-68]
1.41236e-21	0.661025	0.765	0.376	1.9629e-17	3	cycsb	ENSDARG00000044562	https://zfin.org/ZDB-GENE-040625-38	cytochrome c, somatic b [Source:ZFIN;Acc:ZDB-GENE-040625-38]
1.55397e-21	0.603985	0.523	0.184	2.1597e-17	3	ppid	ENSDARG00000038835	https://zfin.org/ZDB-GENE-040625-34	peptidylprolyl isomerase D [Source:ZFIN;Acc:ZDB-GENE-040625-34]
1.80613e-21	0.496456	0.432	0.127	2.51016e-17	3	sf3b4	ENSDARG00000018574	https://zfin.org/ZDB-GENE-020419-22	splicing factor 3b, subunit 4 [Source:ZFIN;Acc:ZDB-GENE-020419-22]
1.98829e-21	0.61158	0.879	0.524	2.76333e-17	3	lsm7	ENSDARG00000058328	https://zfin.org/ZDB-GENE-030131-8284	LSM7 homolog, U6 small nuclear RNA and mRNA degradation associated [Source:ZFIN;Acc:ZDB-GENE-030131-8284]
2.07955e-21	0.637623	0.894	0.599	2.89015e-17	3	cox6c	ENSDARG00000038577	https://zfin.org/ZDB-GENE-040724-95	cytochrome c oxidase subunit VIc [Source:ZFIN;Acc:ZDB-GENE-040724-95]
2.75228e-21	-1.13431	0.348	0.666	3.82512e-17	3	dap1b	ENSDARG00000036895	https://zfin.org/ZDB-GENE-000511-4	death associated protein 1b [Source:ZFIN;Acc:ZDB-GENE-000511-4]
2.79475e-21	0.549942	0.909	0.737	3.88415e-17	3	h3f3b.1.2	ENSDARG00000033009	https://zfin.org/ZDB-GENE-050417-65	H3 histone, family 3B.1 [Source:ZFIN;Acc:ZDB-GENE-050417-65]
2.80276e-21	0.333141	0.152	0.019	3.89527e-17	3	kifc1	ENSDARG00000001558	https://zfin.org/ZDB-GENE-000208-21	kinesin family member C1 [Source:ZFIN;Acc:ZDB-GENE-000208-21]
3.7822e-21	0.402328	0.212	0.038	5.2565e-17	3	ribc2	ENSDARG00000075177	https://zfin.org/ZDB-GENE-050411-27	RIB43A domain with coiled-coils 2 [Source:ZFIN;Acc:ZDB-GENE-050411-27]
4.79535e-21	0.590228	0.561	0.201	6.66458e-17	3	sub1b	ENSDARG00000007720	https://zfin.org/ZDB-GENE-040718-209	SUB1 homolog, transcriptional regulator b [Source:ZFIN;Acc:ZDB-GENE-040718-209]
6.07315e-21	0.456537	0.326	0.081	8.44046e-17	3	dcun1d5	ENSDARG00000100363	https://zfin.org/ZDB-GENE-040426-2603	DCN1, defective in cullin neddylation 1, domain containing 5 (S. cerevisiae) [Source:ZFIN;Acc:ZDB-GENE-040426-2603]
6.5571e-21	0.534513	0.561	0.204	9.11305e-17	3	IDH2	ENSDARG00000003795	https://zfin.org/	isocitrate dehydrogenase (NADP(+)) 2, mitochondrial [Source:HGNC Symbol;Acc:HGNC:5383]
6.98146e-21	0.56551	0.712	0.312	9.70283e-17	3	LSM3	ENSDARG00000089663	https://zfin.org/	LSM3 homolog, U6 small nuclear RNA and mRNA degradation associated [Source:HGNC Symbol;Acc:HGNC:17874]
7.82017e-21	0.620815	0.576	0.224	1.08685e-16	3	nsfl1c	ENSDARG00000087640	https://zfin.org/ZDB-GENE-041114-160	NSFL1 (p97) cofactor (p47) [Source:ZFIN;Acc:ZDB-GENE-041114-160]
7.84504e-21	0.439512	0.348	0.091	1.0903e-16	3	psmd10	ENSDARG00000015628	https://zfin.org/ZDB-GENE-050112-1	proteasome 26S subunit, non-ATPase 10 [Source:ZFIN;Acc:ZDB-GENE-050112-1]
8.17556e-21	0.345252	0.992	0.976	1.13624e-16	3	rpl8	ENSDARG00000014867	https://zfin.org/ZDB-GENE-040426-1670	ribosomal protein L8 [Source:ZFIN;Acc:ZDB-GENE-040426-1670]
8.59553e-21	0.303206	0.129	0.015	1.19461e-16	3	klhl26	ENSDARG00000053876	https://zfin.org/ZDB-GENE-030131-5975	kelch-like family member 26 [Source:ZFIN;Acc:ZDB-GENE-030131-5975]
8.70258e-21	0.723861	0.735	0.363	1.20948e-16	3	psmb2	ENSDARG00000031511	https://zfin.org/ZDB-GENE-040718-353	proteasome subunit beta 2 [Source:ZFIN;Acc:ZDB-GENE-040718-353]
1.15341e-20	-1.55356	0.288	0.622	1.60301e-16	3	cxcl14	ENSDARG00000056627	https://zfin.org/ZDB-GENE-000619-1	chemokine (C-X-C motif) ligand 14 [Source:ZFIN;Acc:ZDB-GENE-000619-1]
1.2475e-20	0.373656	0.295	0.068	1.73378e-16	3	fam107b	ENSDARG00000026865	https://zfin.org/ZDB-GENE-031030-12	family with sequence similarity 107, member B [Source:ZFIN;Acc:ZDB-GENE-031030-12]
1.26258e-20	0.310992	1	0.997	1.75473e-16	3	rps20	ENSDARG00000036044	https://zfin.org/ZDB-GENE-040426-2284	ribosomal protein S20 [Source:ZFIN;Acc:ZDB-GENE-040426-2284]
1.30799e-20	0.340583	0.136	0.016	1.81785e-16	3	ccnb1	ENSDARG00000051923	https://zfin.org/ZDB-GENE-000406-10	cyclin B1 [Source:ZFIN;Acc:ZDB-GENE-000406-10]
1.4789e-20	0.519819	0.303	0.074	2.05537e-16	3	si:dkeyp-122d12.1	ENSDARG00000096684	https://zfin.org/ZDB-GENE-131126-80	si:dkeyp-122d12.1 [Source:ZFIN;Acc:ZDB-GENE-131126-80]
1.49131e-20	0.278077	0.159	0.022	2.07262e-16	3	telo2	ENSDARG00000000830	https://zfin.org/ZDB-GENE-061103-523	TEL2, telomere maintenance 2, homolog (S. cerevisiae) [Source:ZFIN;Acc:ZDB-GENE-061103-523]
1.5287e-20	-1.33017	0.144	0.545	2.12459e-16	3	si:dkey-16l2.20	ENSDARG00000098191	https://zfin.org/ZDB-GENE-141212-380	si:dkey-16l2.20 [Source:ZFIN;Acc:ZDB-GENE-141212-380]
1.90558e-20	0.578276	0.485	0.165	2.64837e-16	3	psmb5	ENSDARG00000075445	https://zfin.org/ZDB-GENE-990415-215	proteasome subunit beta 5 [Source:ZFIN;Acc:ZDB-GENE-990415-215]
2.17951e-20	0.69347	0.364	0.106	3.02908e-16	3	si:ch211-236g6.1	ENSDARG00000071590	https://zfin.org/ZDB-GENE-050208-448	si:ch211-236g6.1 [Source:ZFIN;Acc:ZDB-GENE-050208-448]
2.18891e-20	-1.17416	0.25	0.615	3.04214e-16	3	gsta.1	ENSDARG00000090228	https://zfin.org/ZDB-GENE-040426-2720	glutathione S-transferase, alpha tandem duplicate 1 [Source:ZFIN;Acc:ZDB-GENE-040426-2720]
2.48771e-20	0.40676	0.348	0.092	3.45742e-16	3	polr2h	ENSDARG00000038505	https://zfin.org/ZDB-GENE-050417-66	info polymerase (RNA) II (DNA directed) polypeptide H [Source:ZFIN;Acc:ZDB-GENE-050417-66]
3.04181e-20	0.913885	0.939	0.806	4.22751e-16	3	si:ch73-281n10.2	ENSDARG00000097102	https://zfin.org/ZDB-GENE-131120-172	si:ch73-281n10.2 [Source:ZFIN;Acc:ZDB-GENE-131120-172]
3.06787e-20	0.334476	1	0.986	4.26373e-16	3	rps12	ENSDARG00000036875	https://zfin.org/ZDB-GENE-030131-8951	ribosomal protein S12 [Source:ZFIN;Acc:ZDB-GENE-030131-8951]
3.28573e-20	0.564081	0.917	0.602	4.56651e-16	3	cox8a	ENSDARG00000095273	https://zfin.org/ZDB-GENE-030131-9136	cytochrome c oxidase subunit VIIIA (ubiquitous) [Source:ZFIN;Acc:ZDB-GENE-030131-9136]
3.60504e-20	0.534743	0.508	0.178	5.01029e-16	3	mrpl53	ENSDARG00000008920	https://zfin.org/ZDB-GENE-040912-93	mitochondrial ribosomal protein L53 [Source:ZFIN;Acc:ZDB-GENE-040912-93]
3.82119e-20	0.519799	0.924	0.736	5.31068e-16	3	hmgn6	ENSDARG00000087636	https://zfin.org/ZDB-GENE-030131-1005	high mobility group nucleosome binding domain 6 [Source:ZFIN;Acc:ZDB-GENE-030131-1005]
3.96203e-20	0.535758	0.955	0.79	5.50643e-16	3	zgc:56493	ENSDARG00000031435	https://zfin.org/ZDB-GENE-030131-8581	zgc:56493 [Source:ZFIN;Acc:ZDB-GENE-030131-8581]
4.2888e-20	0.674866	0.659	0.307	5.96057e-16	3	rad21a	ENSDARG00000006092	https://zfin.org/ZDB-GENE-030131-994	RAD21 cohesin complex component a [Source:ZFIN;Acc:ZDB-GENE-030131-994]
5.191e-20	0.556364	0.288	0.07	7.21446e-16	3	kdm6bb	ENSDARG00000056929	https://zfin.org/ZDB-GENE-040724-166	lysine (K)-specific demethylase 6B, b [Source:ZFIN;Acc:ZDB-GENE-040724-166]
5.65348e-20	0.40457	0.265	0.058	7.85721e-16	3	tmeff1b	ENSDARG00000056740	https://zfin.org/ZDB-GENE-050706-143	transmembrane protein with EGF-like and two follistatin-like domains 1b [Source:ZFIN;Acc:ZDB-GENE-050706-143]
6.71223e-20	0.644585	0.841	0.456	9.32866e-16	3	dpy30	ENSDARG00000004427	https://zfin.org/ZDB-GENE-040718-136	dpy-30 histone methyltransferase complex regulatory subunit [Source:ZFIN;Acc:ZDB-GENE-040718-136]
6.96624e-20	0.512249	0.659	0.266	9.68168e-16	3	mbd3a	ENSDARG00000061774	https://zfin.org/ZDB-GENE-030131-9077	methyl-CpG binding domain protein 3a [Source:ZFIN;Acc:ZDB-GENE-030131-9077]
7.23368e-20	0.520305	0.159	0.023	1.00534e-15	3	nusap1	ENSDARG00000002403	https://zfin.org/ZDB-GENE-030827-5	nucleolar and spindle associated protein 1 [Source:ZFIN;Acc:ZDB-GENE-030827-5]
7.29564e-20	0.376776	0.167	0.025	1.01395e-15	3	znf516	ENSDARG00000070809	https://zfin.org/ZDB-GENE-060503-194	zinc finger protein 516 [Source:ZFIN;Acc:ZDB-GENE-060503-194]
8.37955e-20	0.414298	0.25	0.054	1.16459e-15	3	laptm4b	ENSDARG00000035870	https://zfin.org/ZDB-GENE-030616-616	lysosomal protein transmembrane 4 beta [Source:ZFIN;Acc:ZDB-GENE-030616-616]
9.6451e-20	0.431744	0.28	0.065	1.34048e-15	3	zgc:153115	ENSDARG00000069342	https://zfin.org/ZDB-GENE-061013-418	zgc:153115 [Source:ZFIN;Acc:ZDB-GENE-061013-418]
1.01325e-19	0.285069	1	0.998	1.40821e-15	3	rpl36	ENSDARG00000100588	https://zfin.org/ZDB-GENE-040622-2	ribosomal protein L36 [Source:ZFIN;Acc:ZDB-GENE-040622-2]
1.08848e-19	0.330758	0.205	0.037	1.51278e-15	3	lig3	ENSDARG00000052553	https://zfin.org/ZDB-GENE-030131-8453	ligase III, DNA, ATP-dependent [Source:ZFIN;Acc:ZDB-GENE-030131-8453]
1.1495e-19	-1.14641	0.189	0.561	1.59758e-15	3	si:ch211-39i22.1	ENSDARG00000087508	https://zfin.org/ZDB-GENE-120215-258	si:ch211-39i22.1 [Source:ZFIN;Acc:ZDB-GENE-120215-258]
1.17276e-19	0.344395	0.189	0.032	1.62991e-15	3	pde7a	ENSDARG00000045305	https://zfin.org/ZDB-GENE-031222-10	phosphodiesterase 7A [Source:ZFIN;Acc:ZDB-GENE-031222-10]
1.3796e-19	0.568833	0.742	0.358	1.91737e-15	3	lsm5	ENSDARG00000071573	https://zfin.org/ZDB-GENE-070822-23	LSM5 homolog, U6 small nuclear RNA and mRNA degradation associated [Source:ZFIN;Acc:ZDB-GENE-070822-23]
1.40546e-19	0.582838	0.917	0.681	1.95331e-15	3	atp5b	ENSDARG00000070083	https://zfin.org/ZDB-GENE-030131-124	ATP synthase, H+ transporting, mitochondrial F1 complex, beta polypeptide [Source:ZFIN;Acc:ZDB-GENE-030131-124]
1.65817e-19	0.501625	0.47	0.156	2.30453e-15	3	grcc10	ENSDARG00000030038	https://zfin.org/ZDB-GENE-030131-2279	gene rich cluster, C10 gene [Source:ZFIN;Acc:ZDB-GENE-030131-2279]
1.72249e-19	0.354255	0.159	0.023	2.39391e-15	3	dyrk2	ENSDARG00000094646	https://zfin.org/ZDB-GENE-030131-2804	dual-specificity tyrosine-(Y)-phosphorylation regulated kinase 2 [Source:ZFIN;Acc:ZDB-GENE-030131-2804]
1.72406e-19	0.46303	0.977	0.902	2.3961e-15	3	ppiaa	ENSDARG00000009212	https://zfin.org/ZDB-GENE-030131-8556	peptidylprolyl isomerase Aa (cyclophilin A) [Source:ZFIN;Acc:ZDB-GENE-030131-8556]
1.75696e-19	0.475249	0.439	0.14	2.44183e-15	3	nmt1a	ENSDARG00000052966	https://zfin.org/ZDB-GENE-050522-477	N-myristoyltransferase 1a [Source:ZFIN;Acc:ZDB-GENE-050522-477]
1.9025e-19	-0.757269	0.674	0.827	2.64409e-15	3	sepw1	ENSDARG00000035136	https://zfin.org/ZDB-GENE-030410-5	selenoprotein W, 1 [Source:ZFIN;Acc:ZDB-GENE-030410-5]
1.9686e-19	0.368437	0.174	0.029	2.73596e-15	3	prdm1a	ENSDARG00000002445	https://zfin.org/ZDB-GENE-030131-2193	PR domain containing 1a, with ZNF domain [Source:ZFIN;Acc:ZDB-GENE-030131-2193]
2.03764e-19	0.328223	0.144	0.019	2.83191e-15	3	isl2a	ENSDARG00000003971	https://zfin.org/ZDB-GENE-980526-562	ISL LIM homeobox 2a [Source:ZFIN;Acc:ZDB-GENE-980526-562]
2.03885e-19	0.285875	0.174	0.028	2.83359e-15	3	si:ch211-133n4.4	ENSDARG00000071224	https://zfin.org/ZDB-GENE-030131-898	si:ch211-133n4.4 [Source:ZFIN;Acc:ZDB-GENE-030131-898]
2.39032e-19	0.556909	0.902	0.535	3.32207e-15	3	atp5g1	ENSDARG00000056008	https://zfin.org/ZDB-GENE-040426-1966	ATP synthase, H+ transporting, mitochondrial Fo complex, subunit C1 (subunit 9) [Source:ZFIN;Acc:ZDB-GENE-040426-1966]
2.79721e-19	-1.08026	0.258	0.602	3.88757e-15	3	sox3	ENSDARG00000053569	https://zfin.org/ZDB-GENE-980526-333	SRY (sex determining region Y)-box 3 [Source:ZFIN;Acc:ZDB-GENE-980526-333]
3.16657e-19	0.302751	0.227	0.045	4.4009e-15	3	nkain1	ENSDARG00000006859	https://zfin.org/ZDB-GENE-040426-1472	Na+/K+ transporting ATPase interacting 1 [Source:ZFIN;Acc:ZDB-GENE-040426-1472]
3.69406e-19	0.519115	0.879	0.504	5.13401e-15	3	hnrpdl	ENSDARG00000003429	https://zfin.org/ZDB-GENE-040426-2717	heterogeneous nuclear ribonucleoprotein D-like [Source:ZFIN;Acc:ZDB-GENE-040426-2717]
3.91666e-19	0.421079	0.311	0.08	5.44337e-15	3	usp14	ENSDARG00000025889	https://zfin.org/ZDB-GENE-030131-7676	ubiquitin specific peptidase 14 (tRNA-guanine transglycosylase) [Source:ZFIN;Acc:ZDB-GENE-030131-7676]
4.21641e-19	0.417342	0.318	0.084	5.85997e-15	3	phb2b	ENSDARG00000017728	https://zfin.org/ZDB-GENE-040718-430	prohibitin 2b [Source:ZFIN;Acc:ZDB-GENE-040718-430]
4.24765e-19	0.589944	0.318	0.086	5.90338e-15	3	fam60al.1	ENSDARG00000078118	https://zfin.org/ZDB-GENE-031114-2	family with sequence similarity 60, member A, like [Source:ZFIN;Acc:ZDB-GENE-031114-2]
4.48947e-19	0.390448	0.242	0.052	6.23947e-15	3	pim3	ENSDARG00000055129	https://zfin.org/ZDB-GENE-050809-111	Pim-3 proto-oncogene, serine/threonine kinase [Source:ZFIN;Acc:ZDB-GENE-050809-111]
5.32801e-19	0.651153	0.561	0.219	7.40487e-15	3	eif4a1a	ENSDARG00000092115	https://zfin.org/ZDB-GENE-031030-2	eukaryotic translation initiation factor 4A1A [Source:ZFIN;Acc:ZDB-GENE-031030-2]
6.88337e-19	0.789596	0.417	0.142	9.56651e-15	3	cdc14b.1	ENSDARG00000097367	https://zfin.org/
7.22457e-19	0.447556	0.364	0.104	1.00407e-14	3	apex1	ENSDARG00000045843	https://zfin.org/ZDB-GENE-040426-2761	APEX nuclease (multifunctional DNA repair enzyme) 1 [Source:ZFIN;Acc:ZDB-GENE-040426-2761]
8.09341e-19	0.571327	0.629	0.262	1.12482e-14	3	srsf7a	ENSDARG00000035325	https://zfin.org/ZDB-GENE-040426-1798	serine/arginine-rich splicing factor 7a [Source:ZFIN;Acc:ZDB-GENE-040426-1798]
9.49704e-19	0.569463	0.886	0.627	1.3199e-14	3	ran	ENSDARG00000057026	https://zfin.org/ZDB-GENE-990415-88	RAN, member RAS oncogene family [Source:ZFIN;Acc:ZDB-GENE-990415-88]
1.02407e-18	0.53426	0.705	0.315	1.42325e-14	3	fkbp3	ENSDARG00000098059	https://zfin.org/ZDB-GENE-030616-419	FK506 binding protein 3 [Source:ZFIN;Acc:ZDB-GENE-030616-419]
1.11286e-18	0.422011	0.22	0.046	1.54665e-14	3	ttc26	ENSDARG00000012039	https://zfin.org/ZDB-GENE-041212-41	tetratricopeptide repeat domain 26 [Source:ZFIN;Acc:ZDB-GENE-041212-41]
1.16087e-18	0.598737	0.773	0.385	1.61337e-14	3	hypk	ENSDARG00000059725	https://zfin.org/ZDB-GENE-080515-6	huntingtin interacting protein K [Source:ZFIN;Acc:ZDB-GENE-080515-6]
1.20436e-18	-1.21618	0.136	0.512	1.67382e-14	3	fam46bb	ENSDARG00000011797	https://zfin.org/ZDB-GENE-060503-431	family with sequence similarity 46, member Bb [Source:ZFIN;Acc:ZDB-GENE-060503-431]
1.30783e-18	0.550133	0.402	0.129	1.81762e-14	3	si:ch211-248e11.2	ENSDARG00000058940	https://zfin.org/ZDB-GENE-081104-197	si:ch211-248e11.2 [Source:ZFIN;Acc:ZDB-GENE-081104-197]
1.35096e-18	0.412517	0.439	0.139	1.87756e-14	3	inip	ENSDARG00000028523	https://zfin.org/ZDB-GENE-040426-961	ints3 and nabp interacting protein [Source:ZFIN;Acc:ZDB-GENE-040426-961]
1.37281e-18	0.563551	0.197	0.037	1.90793e-14	3	ccna2	ENSDARG00000011094	https://zfin.org/ZDB-GENE-020418-1	cyclin A2 [Source:ZFIN;Acc:ZDB-GENE-020418-1]
1.42749e-18	0.574462	0.871	0.595	1.98393e-14	3	rbx1	ENSDARG00000038030	https://zfin.org/ZDB-GENE-041008-106	ring-box 1, E3 ubiquitin protein ligase [Source:ZFIN;Acc:ZDB-GENE-041008-106]
1.43443e-18	0.642461	0.591	0.249	1.99357e-14	3	nucks1a	ENSDARG00000078473	https://zfin.org/ZDB-GENE-040912-175	nuclear casein kinase and cyclin-dependent kinase substrate 1a [Source:ZFIN;Acc:ZDB-GENE-040912-175]
1.43598e-18	0.507313	0.371	0.112	1.99572e-14	3	itpa	ENSDARG00000057529	https://zfin.org/ZDB-GENE-070705-218	inosine triphosphatase (nucleoside triphosphate pyrophosphatase) [Source:ZFIN;Acc:ZDB-GENE-070705-218]
1.45016e-18	0.390736	0.364	0.104	2.01543e-14	3	smarcd1	ENSDARG00000019004	https://zfin.org/ZDB-GENE-030131-1835	SWI/SNF related, matrix associated, actin dependent regulator of chromatin, subfamily d, member 1 [Source:ZFIN;Acc:ZDB-GENE-030131-1835]
1.47921e-18	0.524004	0.591	0.23	2.05581e-14	3	tomm6	ENSDARG00000097797	https://zfin.org/ZDB-GENE-131121-445	translocase of outer mitochondrial membrane 6 homolog (yeast) [Source:ZFIN;Acc:ZDB-GENE-131121-445]
1.54358e-18	0.522242	0.455	0.155	2.14527e-14	3	g3bp1	ENSDARG00000017741	https://zfin.org/ZDB-GENE-030131-7452	GTPase activating protein (SH3 domain) binding protein 1 [Source:ZFIN;Acc:ZDB-GENE-030131-7452]
1.69559e-18	-1.08331	0.28	0.617	2.35653e-14	3	mcl1b	ENSDARG00000008363	https://zfin.org/ZDB-GENE-030825-1	myeloid cell leukemia 1b [Source:ZFIN;Acc:ZDB-GENE-030825-1]
1.75017e-18	0.333759	0.992	0.969	2.43238e-14	3	rps21	ENSDARG00000025850	https://zfin.org/ZDB-GENE-040426-1102	ribosomal protein S21 [Source:ZFIN;Acc:ZDB-GENE-040426-1102]
1.78611e-18	-1.20308	0.197	0.548	2.48233e-14	3	six2b	ENSDARG00000054878	https://zfin.org/ZDB-GENE-080723-23	SIX homeobox 2b [Source:ZFIN;Acc:ZDB-GENE-080723-23]
1.83979e-18	0.278734	1	0.999	2.55694e-14	3	rplp1	ENSDARG00000021864	https://zfin.org/ZDB-GENE-030131-8663	ribosomal protein, large, P1 [Source:ZFIN;Acc:ZDB-GENE-030131-8663]
1.91169e-18	-0.558911	0.932	0.951	2.65687e-14	3	sec61g	ENSDARG00000018637	https://zfin.org/ZDB-GENE-040718-203	Sec61 translocon gamma subunit [Source:ZFIN;Acc:ZDB-GENE-040718-203]
1.92812e-18	0.484696	0.576	0.22	2.67971e-14	3	selt2	ENSDARG00000023220	https://zfin.org/ZDB-GENE-030411-4	selenoprotein T, 2 [Source:ZFIN;Acc:ZDB-GENE-030411-4]
2.08837e-18	-1.14609	0.152	0.514	2.90242e-14	3	moxd1l	ENSDARG00000069296	https://zfin.org/ZDB-GENE-060126-3	monooxygenase, DBH-like 1, like [Source:ZFIN;Acc:ZDB-GENE-060126-3]
2.13995e-18	0.451835	0.439	0.144	2.9741e-14	3	mrps21	ENSDARG00000070985	https://zfin.org/ZDB-GENE-070615-13	mitochondrial ribosomal protein S21 [Source:ZFIN;Acc:ZDB-GENE-070615-13]
2.15693e-18	0.29523	1	0.994	2.9977e-14	3	rpl11	ENSDARG00000043509	https://zfin.org/ZDB-GENE-040625-147	ribosomal protein L11 [Source:ZFIN;Acc:ZDB-GENE-040625-147]
2.15935e-18	0.300338	0.129	0.016	3.00107e-14	3	nfia	ENSDARG00000062420	https://zfin.org/ZDB-GENE-050208-501	nuclear factor I/A [Source:ZFIN;Acc:ZDB-GENE-050208-501]
2.52076e-18	-1.10129	0.189	0.536	3.50335e-14	3	si:ch211-98n17.5	ENSDARG00000105641	https://zfin.org/ZDB-GENE-160728-87	si:ch211-98n17.5 [Source:ZFIN;Acc:ZDB-GENE-160728-87]
2.53236e-18	0.435197	0.402	0.125	3.51948e-14	3	rfxap	ENSDARG00000076891	https://zfin.org/ZDB-GENE-091204-321	regulatory factor X-associated protein [Source:ZFIN;Acc:ZDB-GENE-091204-321]
3.2042e-18	-1.33895	0.129	0.495	4.4532e-14	3	net1	ENSDARG00000032765	https://zfin.org/ZDB-GENE-041121-18	neuroepithelial cell transforming 1 [Source:ZFIN;Acc:ZDB-GENE-041121-18]
3.21372e-18	0.323733	0.265	0.062	4.46642e-14	3	gpat4	ENSDARG00000019897	https://zfin.org/ZDB-GENE-060421-5102	glycerol-3-phosphate acyltransferase 4 [Source:ZFIN;Acc:ZDB-GENE-060421-5102]
4.22766e-18	0.570773	0.742	0.368	5.8756e-14	3	sf3a2	ENSDARG00000021107	https://zfin.org/ZDB-GENE-040426-897	splicing factor 3a, subunit 2 [Source:ZFIN;Acc:ZDB-GENE-040426-897]
4.60569e-18	0.501114	0.902	0.53	6.40098e-14	3	atp5h	ENSDARG00000098355	https://zfin.org/ZDB-GENE-040426-1658	ATP synthase, H+ transporting, mitochondrial Fo complex, subunit d [Source:ZFIN;Acc:ZDB-GENE-040426-1658]
5.2947e-18	0.379121	0.348	0.1	7.35858e-14	3	lin52	ENSDARG00000070833	https://zfin.org/ZDB-GENE-061110-82	lin-52 DREAM MuvB core complex component [Source:ZFIN;Acc:ZDB-GENE-061110-82]
5.38279e-18	0.588865	0.841	0.528	7.48101e-14	3	sub1a	ENSDARG00000053446	https://zfin.org/ZDB-GENE-050522-151	SUB1 homolog, transcriptional regulator a [Source:ZFIN;Acc:ZDB-GENE-050522-151]
5.66477e-18	0.570165	0.818	0.49	7.8729e-14	3	atp5c1	ENSDARG00000045514	https://zfin.org/ZDB-GENE-030131-8901	ATP synthase, H+ transporting, mitochondrial F1 complex, gamma polypeptide 1 [Source:ZFIN;Acc:ZDB-GENE-030131-8901]
5.99389e-18	0.574723	0.583	0.248	8.33031e-14	3	hnrnph1l	ENSDARG00000005551	https://zfin.org/ZDB-GENE-030131-275	heterogeneous nuclear ribonucleoprotein H1, like [Source:ZFIN;Acc:ZDB-GENE-030131-275]
6.91509e-18	0.724575	0.25	0.058	9.61059e-14	3	mad2l1	ENSDARG00000004713	https://zfin.org/ZDB-GENE-030515-3	MAD2 mitotic arrest deficient-like 1 (yeast) [Source:ZFIN;Acc:ZDB-GENE-030515-3]
7.12145e-18	0.549424	0.644	0.287	9.8974e-14	3	ube2d2	ENSDARG00000043484	https://zfin.org/ZDB-GENE-120312-1	ubiquitin-conjugating enzyme E2D 2 (UBC4/5 homolog, yeast) [Source:ZFIN;Acc:ZDB-GENE-120312-1]
7.50927e-18	0.33626	0.159	0.025	1.04364e-13	3	gse1	ENSDARG00000062020	https://zfin.org/ZDB-GENE-030131-9569	Gse1 coiled-coil protein [Source:ZFIN;Acc:ZDB-GENE-030131-9569]
7.58802e-18	0.504906	0.598	0.233	1.05458e-13	3	zfand5b	ENSDARG00000002271	https://zfin.org/ZDB-GENE-040426-875	zinc finger, AN1-type domain 5b [Source:ZFIN;Acc:ZDB-GENE-040426-875]
7.72576e-18	0.431079	0.318	0.087	1.07373e-13	3	ckbb	ENSDARG00000043257	https://zfin.org/ZDB-GENE-020103-2	creatine kinase, brain b [Source:ZFIN;Acc:ZDB-GENE-020103-2]
8.0275e-18	0.402808	0.409	0.128	1.11566e-13	3	polr3k	ENSDARG00000037835	https://zfin.org/ZDB-GENE-040718-291	polymerase (RNA) III (DNA directed) polypeptide K [Source:ZFIN;Acc:ZDB-GENE-040718-291]
8.04824e-18	0.552804	0.856	0.509	1.11854e-13	3	sap18	ENSDARG00000057854	https://zfin.org/ZDB-GENE-040426-1679	Sin3A-associated protein [Source:ZFIN;Acc:ZDB-GENE-040426-1679]
8.35397e-18	0.640003	0.765	0.423	1.16103e-13	3	anp32a	ENSDARG00000006487	https://zfin.org/ZDB-GENE-030131-7850	acidic (leucine-rich) nuclear phosphoprotein 32 family, member A [Source:ZFIN;Acc:ZDB-GENE-030131-7850]
8.81819e-18	0.507734	0.576	0.232	1.22555e-13	3	smc1al	ENSDARG00000058203	https://zfin.org/ZDB-GENE-040426-57	structural maintenance of chromosomes 1A, like [Source:ZFIN;Acc:ZDB-GENE-040426-57]
9.56452e-18	0.263756	1	0.995	1.32928e-13	3	rpl32	ENSDARG00000054818	https://zfin.org/ZDB-GENE-060331-105	ribosomal protein L32 [Source:ZFIN;Acc:ZDB-GENE-060331-105]
1.04907e-17	0.379684	0.189	0.035	1.45799e-13	3	zbtb18	ENSDARG00000028228	https://zfin.org/ZDB-GENE-050419-73	zinc finger and BTB domain containing 18 [Source:ZFIN;Acc:ZDB-GENE-050419-73]
1.26945e-17	0.476548	0.409	0.133	1.76428e-13	3	hnrnpub	ENSDARG00000004735	https://zfin.org/ZDB-GENE-030131-6422	heterogeneous nuclear ribonucleoprotein Ub [Source:ZFIN;Acc:ZDB-GENE-030131-6422]
1.28126e-17	0.600136	0.667	0.315	1.7807e-13	3	capn8	ENSDARG00000055715	https://zfin.org/ZDB-GENE-050522-279	calpain 8 [Source:ZFIN;Acc:ZDB-GENE-050522-279]
1.32235e-17	0.61028	0.621	0.281	1.8378e-13	3	psma6b	ENSDARG00000013966	https://zfin.org/ZDB-GENE-040718-329	proteasome subunit alpha 6b [Source:ZFIN;Acc:ZDB-GENE-040718-329]
1.35436e-17	0.416987	0.28	0.072	1.88229e-13	3	zgc:114119	ENSDARG00000098992	https://zfin.org/ZDB-GENE-050913-56	zgc:114119 [Source:ZFIN;Acc:ZDB-GENE-050913-56]
1.46993e-17	0.53355	0.455	0.162	2.04291e-13	3	ing4	ENSDARG00000030716	https://zfin.org/ZDB-GENE-050522-47	inhibitor of growth family, member 4 [Source:ZFIN;Acc:ZDB-GENE-050522-47]
1.49887e-17	0.283044	0.121	0.015	2.08312e-13	3	myo15b	ENSDARG00000074852	https://zfin.org/ZDB-GENE-030131-4797	myosin XVB [Source:ZFIN;Acc:ZDB-GENE-030131-4797]
1.53439e-17	0.38047	0.152	0.024	2.1325e-13	3	spag6	ENSDARG00000020158	https://zfin.org/ZDB-GENE-040704-53	sperm associated antigen 6 [Source:ZFIN;Acc:ZDB-GENE-040704-53]
1.60379e-17	0.435531	0.394	0.124	2.22895e-13	3	yeats4	ENSDARG00000045874	https://zfin.org/ZDB-GENE-040718-252	YEATS domain containing 4 [Source:ZFIN;Acc:ZDB-GENE-040718-252]
1.66572e-17	0.415398	0.22	0.048	2.31502e-13	3	si:ch211-262i1.2	ENSDARG00000100639	https://zfin.org/ZDB-GENE-141216-186	si:ch211-262i1.2 [Source:ZFIN;Acc:ZDB-GENE-141216-186]
1.71593e-17	0.504636	0.727	0.349	2.38481e-13	3	naa10	ENSDARG00000071060	https://zfin.org/ZDB-GENE-040426-2648	N(alpha)-acetyltransferase 10, NatA catalytic subunit [Source:ZFIN;Acc:ZDB-GENE-040426-2648]
1.78207e-17	0.274876	0.129	0.018	2.47672e-13	3	micall2a	ENSDARG00000102366	https://zfin.org/ZDB-GENE-030131-5409	mical-like 2a [Source:ZFIN;Acc:ZDB-GENE-030131-5409]
2.01106e-17	0.518629	0.879	0.618	2.79497e-13	3	sumo2b	ENSDARG00000102741	https://zfin.org/ZDB-GENE-040801-7	small ubiquitin-like modifier 2b [Source:ZFIN;Acc:ZDB-GENE-040801-7]
2.25519e-17	0.421808	0.364	0.11	3.13426e-13	3	polr2c	ENSDARG00000033596	https://zfin.org/ZDB-GENE-030131-6609	polymerase (RNA) II (DNA directed) polypeptide C [Source:ZFIN;Acc:ZDB-GENE-030131-6609]
2.29322e-17	0.549181	0.568	0.239	3.18711e-13	3	tceb2.2	ENSDARG00000097740	https://zfin.org/ZDB-GENE-020415-1	transcription elongation factor B (SIII), polypeptide 2 [Source:ZFIN;Acc:ZDB-GENE-020415-1]
2.37451e-17	0.5109	0.644	0.286	3.30009e-13	3	vdac1	ENSDARG00000045132	https://zfin.org/ZDB-GENE-030131-6514	voltage-dependent anion channel 1 [Source:ZFIN;Acc:ZDB-GENE-030131-6514]
2.41697e-17	-0.675925	0.727	0.833	3.3591e-13	3	selm	ENSDARG00000051957	https://zfin.org/ZDB-GENE-030410-4	selenoprotein M [Source:ZFIN;Acc:ZDB-GENE-030410-4]
2.43101e-17	0.554999	0.879	0.554	3.37861e-13	3	rpl22l1	ENSDARG00000010244	https://zfin.org/ZDB-GENE-060804-3	ribosomal protein L22-like 1 [Source:ZFIN;Acc:ZDB-GENE-060804-3]
2.62319e-17	0.377365	0.28	0.071	3.64571e-13	3	si:ch211-197h24.6	ENSDARG00000091631	https://zfin.org/ZDB-GENE-030131-1361	si:ch211-197h24.6 [Source:ZFIN;Acc:ZDB-GENE-030131-1361]
2.78295e-17	0.517993	0.356	0.11	3.86774e-13	3	grtp1a	ENSDARG00000029936	https://zfin.org/ZDB-GENE-040426-2733	growth hormone regulated TBC protein 1a [Source:ZFIN;Acc:ZDB-GENE-040426-2733]
3.30425e-17	-1.14026	0.205	0.523	4.59225e-13	3	capgb	ENSDARG00000099672	https://zfin.org/ZDB-GENE-030131-8541	capping protein (actin filament), gelsolin-like b [Source:ZFIN;Acc:ZDB-GENE-030131-8541]
3.64577e-17	0.399714	0.288	0.076	5.06689e-13	3	strbp	ENSDARG00000021455	https://zfin.org/ZDB-GENE-030729-18	spermatid perinuclear RNA binding protein [Source:ZFIN;Acc:ZDB-GENE-030729-18]
3.75379e-17	0.42946	0.371	0.116	5.21702e-13	3	gpatch11	ENSDARG00000026892	https://zfin.org/ZDB-GENE-040718-89	G patch domain containing 11 [Source:ZFIN;Acc:ZDB-GENE-040718-89]
3.8116e-17	0.30898	0.205	0.041	5.29736e-13	3	psat1	ENSDARG00000016733	https://zfin.org/ZDB-GENE-030131-5723	phosphoserine aminotransferase 1 [Source:ZFIN;Acc:ZDB-GENE-030131-5723]
5.90325e-17	0.42865	0.492	0.179	8.20434e-13	3	rbbp4	ENSDARG00000029058	https://zfin.org/ZDB-GENE-030131-445	retinoblastoma binding protein 4 [Source:ZFIN;Acc:ZDB-GENE-030131-445]
6.4952e-17	-1.09579	0.106	0.466	9.02703e-13	3	tspan35	ENSDARG00000025757	https://zfin.org/ZDB-GENE-040426-1362	tetraspanin 35 [Source:ZFIN;Acc:ZDB-GENE-040426-1362]
7.50278e-17	0.416332	0.25	0.06	1.04274e-12	3	irx2a	ENSDARG00000001785	https://zfin.org/ZDB-GENE-040426-1446	iroquois homeobox 2a [Source:ZFIN;Acc:ZDB-GENE-040426-1446]
7.57198e-17	-1.35557	0.576	0.745	1.05235e-12	3	si:ch211-117m20.5	ENSDARG00000091996	https://zfin.org/ZDB-GENE-030131-12	si:ch211-117m20.5 [Source:ZFIN;Acc:ZDB-GENE-030131-12]
8.44861e-17	0.362863	0.333	0.097	1.17419e-12	3	idh3b	ENSDARG00000044753	https://zfin.org/ZDB-GENE-040625-174	isocitrate dehydrogenase 3 (NAD+) beta [Source:ZFIN;Acc:ZDB-GENE-040625-174]
8.56527e-17	0.510192	0.924	0.599	1.1904e-12	3	atp5j	ENSDARG00000014313	https://zfin.org/ZDB-GENE-040426-2534	ATP synthase, H+ transporting, mitochondrial Fo complex, subunit F6 [Source:ZFIN;Acc:ZDB-GENE-040426-2534]
8.6288e-17	-2.02611	0.848	0.893	1.19923e-12	3	si:dkey-4p15.5	ENSDARG00000086272	https://zfin.org/ZDB-GENE-121214-193	si:dkey-4p15.5 [Source:ZFIN;Acc:ZDB-GENE-121214-193]
8.7924e-17	0.326381	0.992	0.963	1.22197e-12	3	rplp0	ENSDARG00000051783	https://zfin.org/ZDB-GENE-000629-1	ribosomal protein, large, P0 [Source:ZFIN;Acc:ZDB-GENE-000629-1]
8.93871e-17	0.478119	0.318	0.093	1.2423e-12	3	fntb	ENSDARG00000027916	https://zfin.org/ZDB-GENE-030131-2220	farnesyltransferase, CAAX box, beta [Source:ZFIN;Acc:ZDB-GENE-030131-2220]
9.2695e-17	0.313925	1	0.971	1.28828e-12	3	rps13	ENSDARG00000036298	https://zfin.org/ZDB-GENE-040625-52	ribosomal protein S13 [Source:ZFIN;Acc:ZDB-GENE-040625-52]
1.0344e-16	0.407068	0.523	0.198	1.43761e-12	3	tmco1	ENSDARG00000069099	https://zfin.org/ZDB-GENE-050417-344	transmembrane and coiled-coil domains 1 [Source:ZFIN;Acc:ZDB-GENE-050417-344]
1.04369e-16	0.3164	0.992	0.972	1.45052e-12	3	rps6	ENSDARG00000019778	https://zfin.org/ZDB-GENE-040801-8	ribosomal protein S6 [Source:ZFIN;Acc:ZDB-GENE-040801-8]
1.10142e-16	0.40344	0.167	0.031	1.53075e-12	3	catip	ENSDARG00000063009	https://zfin.org/ZDB-GENE-060929-1170	ciliogenesis associated TTC17 interacting protein [Source:ZFIN;Acc:ZDB-GENE-060929-1170]
1.11659e-16	0.505241	0.598	0.255	1.55184e-12	3	cetn4	ENSDARG00000041215	https://zfin.org/ZDB-GENE-030826-21	centrin 4 [Source:ZFIN;Acc:ZDB-GENE-030826-21]
1.19882e-16	0.374165	0.303	0.083	1.66612e-12	3	rnps1	ENSDARG00000015853	https://zfin.org/ZDB-GENE-030131-5228	RNA binding protein S1, serine-rich domain [Source:ZFIN;Acc:ZDB-GENE-030131-5228]
1.24459e-16	0.495626	0.242	0.058	1.72973e-12	3	si:dkey-280e21.3	ENSDARG00000056519	https://zfin.org/ZDB-GENE-140106-61	si:dkey-280e21.3 [Source:ZFIN;Acc:ZDB-GENE-140106-61]
1.44526e-16	0.553701	0.818	0.47	2.00862e-12	3	snrpd3l	ENSDARG00000076283	https://zfin.org/ZDB-GENE-030131-5219	small nuclear ribonucleoprotein D3 polypeptide, like [Source:ZFIN;Acc:ZDB-GENE-030131-5219]
1.46082e-16	0.499266	0.902	0.615	2.03024e-12	3	mibp2	ENSDARG00000101844	https://zfin.org/ZDB-GENE-031113-14	muscle-specific beta 1 integrin binding protein 2 [Source:ZFIN;Acc:ZDB-GENE-031113-14]
1.54821e-16	0.514381	0.53	0.216	2.1517e-12	3	hnrnpl2	ENSDARG00000059303	https://zfin.org/ZDB-GENE-040426-2707	heterogeneous nuclear ribonucleoprotein L2 [Source:ZFIN;Acc:ZDB-GENE-040426-2707]
1.72171e-16	0.621213	0.205	0.045	2.39283e-12	3	scg5	ENSDARG00000032126	https://zfin.org/ZDB-GENE-040426-1687	secretogranin V [Source:ZFIN;Acc:ZDB-GENE-040426-1687]
1.74243e-16	0.506558	0.614	0.271	2.42164e-12	3	emc6	ENSDARG00000035282	https://zfin.org/ZDB-GENE-030131-9164	ER membrane protein complex subunit 6 [Source:ZFIN;Acc:ZDB-GENE-030131-9164]
2.09671e-16	0.564669	0.742	0.41	2.91401e-12	3	vma21	ENSDARG00000093945	https://zfin.org/ZDB-GENE-081104-272	VMA21 vacuolar H+-ATPase homolog (S. cerevisiae) [Source:ZFIN;Acc:ZDB-GENE-081104-272]
2.27418e-16	0.451586	0.955	0.786	3.16065e-12	3	atp5e	ENSDARG00000095897	https://zfin.org/ZDB-GENE-110411-22	ATP synthase, H+ transporting, mitochondrial F1 complex, epsilon subunit [Source:ZFIN;Acc:ZDB-GENE-110411-22]
2.28132e-16	0.339764	0.25	0.061	3.17058e-12	3	mplkip	ENSDARG00000078986	https://zfin.org/ZDB-GENE-070912-182	M-phase specific PLK1 interacting protein [Source:ZFIN;Acc:ZDB-GENE-070912-182]
2.31287e-16	0.378036	0.28	0.076	3.21443e-12	3	fam168b	ENSDARG00000101733	https://zfin.org/ZDB-GENE-060929-180	family with sequence similarity 168, member B [Source:ZFIN;Acc:ZDB-GENE-060929-180]
2.67321e-16	-1.09462	0.591	0.749	3.71523e-12	3	TMSB15A	ENSDARG00000104181	https://zfin.org/ZDB-GENE-030131-8575	si:dkey-152p16.6 [Source:ZFIN;Acc:ZDB-GENE-030131-8575]
2.80537e-16	0.289466	0.174	0.033	3.89891e-12	3	ift52	ENSDARG00000045025	https://zfin.org/ZDB-GENE-040614-3	intraflagellar transport 52 homolog (Chlamydomonas) [Source:ZFIN;Acc:ZDB-GENE-040614-3]
2.97527e-16	0.282207	0.114	0.015	4.13502e-12	3	tuba1b	ENSDARG00000045367	https://zfin.org/ZDB-GENE-030822-1	tubulin, alpha 1b [Source:ZFIN;Acc:ZDB-GENE-030822-1]
3.02022e-16	0.454007	0.477	0.175	4.1975e-12	3	hsd17b10	ENSDARG00000017781	https://zfin.org/ZDB-GENE-041010-201	hydroxysteroid (17-beta) dehydrogenase 10 [Source:ZFIN;Acc:ZDB-GENE-041010-201]
3.15315e-16	0.427311	0.371	0.119	4.38225e-12	3	adrm1	ENSDARG00000058560	https://zfin.org/ZDB-GENE-040426-905	adhesion regulating molecule 1 [Source:ZFIN;Acc:ZDB-GENE-040426-905]
3.26376e-16	0.255091	0.144	0.023	4.53597e-12	3	alms1	ENSDARG00000074779	https://zfin.org/ZDB-GENE-030131-4837	Alstrom syndrome protein 1 [Source:ZFIN;Acc:ZDB-GENE-030131-4837]
3.3309e-16	-1.15112	0.167	0.505	4.62928e-12	3	rpz5	ENSDARG00000075718	https://zfin.org/ZDB-GENE-030131-4678	rapunzel 5 [Source:ZFIN;Acc:ZDB-GENE-030131-4678]
3.33808e-16	0.491025	0.462	0.171	4.63927e-12	3	si:dkey-95p16.2	ENSDARG00000093484	https://zfin.org/ZDB-GENE-081105-65	si:dkey-95p16.2 [Source:ZFIN;Acc:ZDB-GENE-081105-65]
3.72405e-16	0.493774	0.917	0.684	5.17568e-12	3	ddx5	ENSDARG00000038068	https://zfin.org/ZDB-GENE-030131-925	DEAD (Asp-Glu-Ala-Asp) box helicase 5 [Source:ZFIN;Acc:ZDB-GENE-030131-925]
3.89793e-16	0.267973	1	0.999	5.41735e-12	3	rps28	ENSDARG00000035860	https://zfin.org/ZDB-GENE-030131-2022	ribosomal protein S28 [Source:ZFIN;Acc:ZDB-GENE-030131-2022]
3.98337e-16	0.330396	1	0.972	5.53608e-12	3	hspa8	ENSDARG00000068992	https://zfin.org/ZDB-GENE-990415-92	heat shock protein 8 [Source:ZFIN;Acc:ZDB-GENE-990415-92]
4.17875e-16	-1.313	0.189	0.505	5.80763e-12	3	slc1a3a	ENSDARG00000104431	https://zfin.org/ZDB-GENE-030131-2159	solute carrier family 1 (glial high affinity glutamate transporter), member 3a [Source:ZFIN;Acc:ZDB-GENE-030131-2159]
4.53074e-16	0.5001	0.674	0.314	6.29682e-12	3	max	ENSDARG00000024844	https://zfin.org/ZDB-GENE-990415-152	myc associated factor X [Source:ZFIN;Acc:ZDB-GENE-990415-152]
4.53099e-16	0.53115	0.667	0.307	6.29718e-12	3	dynll2b	ENSDARG00000005172	https://zfin.org/ZDB-GENE-050320-132	dynein, light chain, LC8-type 2b [Source:ZFIN;Acc:ZDB-GENE-050320-132]
4.58435e-16	0.454752	0.326	0.099	6.37133e-12	3	dnaja2l	ENSDARG00000010745	https://zfin.org/ZDB-GENE-030131-2884	DnaJ (Hsp40) homolog, subfamily A, member 2, like [Source:ZFIN;Acc:ZDB-GENE-030131-2884]
4.72371e-16	0.528191	0.432	0.155	6.56501e-12	3	nono	ENSDARG00000020482	https://zfin.org/ZDB-GENE-030131-713	non-POU domain containing, octamer-binding [Source:ZFIN;Acc:ZDB-GENE-030131-713]
5.14269e-16	0.481521	0.417	0.146	7.14731e-12	3	kdm1a	ENSDARG00000060679	https://zfin.org/ZDB-GENE-030131-7828	lysine (K)-specific demethylase 1a [Source:ZFIN;Acc:ZDB-GENE-030131-7828]
5.58819e-16	0.42852	0.447	0.159	7.76646e-12	3	rcc2	ENSDARG00000011510	https://zfin.org/ZDB-GENE-040426-2213	regulator of chromosome condensation 2 [Source:ZFIN;Acc:ZDB-GENE-040426-2213]
5.78637e-16	0.282092	0.152	0.026	8.0419e-12	3	irak1bp1	ENSDARG00000036903	https://zfin.org/ZDB-GENE-050522-272	interleukin-1 receptor-associated kinase 1 binding protein 1 [Source:ZFIN;Acc:ZDB-GENE-050522-272]
6.17005e-16	0.481586	0.583	0.252	8.57513e-12	3	pfdn4	ENSDARG00000061228	https://zfin.org/ZDB-GENE-100922-122	prefoldin subunit 4 [Source:ZFIN;Acc:ZDB-GENE-100922-122]
6.57681e-16	0.452691	0.932	0.632	9.14045e-12	3	cox6a1	ENSDARG00000022438	https://zfin.org/ZDB-GENE-030131-7715	cytochrome c oxidase subunit VIa polypeptide 1 [Source:ZFIN;Acc:ZDB-GENE-030131-7715]
6.6617e-16	0.458321	0.455	0.168	9.25844e-12	3	mrpl57	ENSDARG00000007285	https://zfin.org/ZDB-GENE-040426-1745	mitochondrial ribosomal protein L57 [Source:ZFIN;Acc:ZDB-GENE-040426-1745]
6.76953e-16	0.381322	0.341	0.104	9.40829e-12	3	tmem231	ENSDARG00000042272	https://zfin.org/ZDB-GENE-040426-1386	transmembrane protein 231 [Source:ZFIN;Acc:ZDB-GENE-040426-1386]
7.08294e-16	0.297419	0.144	0.024	9.84388e-12	3	tmem110	ENSDARG00000013694	https://zfin.org/ZDB-GENE-040426-1198	transmembrane protein 110 [Source:ZFIN;Acc:ZDB-GENE-040426-1198]
7.13444e-16	0.472953	0.568	0.235	9.91544e-12	3	taf15	ENSDARG00000070019	https://zfin.org/ZDB-GENE-061215-102	TAF15 RNA polymerase II, TATA box binding protein (TBP)-associated factor [Source:ZFIN;Acc:ZDB-GENE-061215-102]
7.23901e-16	0.275309	1	0.985	1.00608e-11	3	rps7	ENSDARG00000042566	https://zfin.org/ZDB-GENE-040426-1718	ribosomal protein S7 [Source:ZFIN;Acc:ZDB-GENE-040426-1718]
7.37895e-16	0.409913	0.333	0.101	1.02553e-11	3	smarca5	ENSDARG00000052348	https://zfin.org/ZDB-GENE-021125-1	SWI/SNF related, matrix associated, actin dependent regulator of chromatin, subfamily a, member 5 [Source:ZFIN;Acc:ZDB-GENE-021125-1]
7.43222e-16	0.381065	0.356	0.111	1.03293e-11	3	hars	ENSDARG00000003693	https://zfin.org/ZDB-GENE-040912-152	histidyl-tRNA synthetase [Source:ZFIN;Acc:ZDB-GENE-040912-152]
7.47239e-16	-1.05008	0.22	0.536	1.03851e-11	3	pmp22a	ENSDARG00000105223	https://zfin.org/ZDB-GENE-030131-6757	peripheral myelin protein 22a [Source:ZFIN;Acc:ZDB-GENE-030131-6757]
7.49534e-16	0.532719	0.333	0.105	1.0417e-11	3	gid8a	ENSDARG00000022768	https://zfin.org/ZDB-GENE-040426-1669	GID complex subunit 8 homolog a (S. cerevisiae) [Source:ZFIN;Acc:ZDB-GENE-040426-1669]
8.0116e-16	0.422535	1	0.945	1.11345e-11	3	mt-atp6	ENSDARG00000063911	https://zfin.org/ZDB-GENE-011205-18	ATP synthase 6, mitochondrial [Source:ZFIN;Acc:ZDB-GENE-011205-18]
8.54419e-16	0.483953	0.833	0.497	1.18747e-11	3	bud31	ENSDARG00000017084	https://zfin.org/ZDB-GENE-040720-3	BUD31 homolog (S. cerevisiae) [Source:ZFIN;Acc:ZDB-GENE-040720-3]
8.62663e-16	-1.06316	0.371	0.596	1.19893e-11	3	si:ch211-152c2.3	ENSDARG00000045898	https://zfin.org/ZDB-GENE-030131-9914	si:ch211-152c2.3 [Source:ZFIN;Acc:ZDB-GENE-030131-9914]
1.05996e-15	0.362988	0.303	0.087	1.47313e-11	3	gpn2	ENSDARG00000103127	https://zfin.org/ZDB-GENE-041010-86	GPN-loop GTPase 2 [Source:ZFIN;Acc:ZDB-GENE-041010-86]
1.17757e-15	0.5186	0.886	0.558	1.63658e-11	3	cox5aa	ENSDARG00000088383	https://zfin.org/ZDB-GENE-050522-133	cytochrome c oxidase subunit Vaa [Source:ZFIN;Acc:ZDB-GENE-050522-133]
1.20239e-15	-1.31861	0.152	0.472	1.67109e-11	3	prss60.2	ENSDARG00000055644	https://zfin.org/ZDB-GENE-050320-109	protease, serine, 60.2 [Source:ZFIN;Acc:ZDB-GENE-050320-109]
1.22166e-15	-0.990612	0.205	0.521	1.69786e-11	3	cpm	ENSDARG00000011769	https://zfin.org/ZDB-GENE-041210-191	carboxypeptidase M [Source:ZFIN;Acc:ZDB-GENE-041210-191]
1.23245e-15	0.3732	0.288	0.08	1.71286e-11	3	tmem35	ENSDARG00000052567	https://zfin.org/ZDB-GENE-030815-1	transmembrane protein 35 [Source:ZFIN;Acc:ZDB-GENE-030815-1]
1.23755e-15	0.500084	0.886	0.578	1.71995e-11	3	erh	ENSDARG00000032866	https://zfin.org/ZDB-GENE-990415-57	enhancer of rudimentary homolog (Drosophila) [Source:ZFIN;Acc:ZDB-GENE-990415-57]
1.33724e-15	0.376497	0.962	0.887	1.85849e-11	3	fkbp1aa	ENSDARG00000022684	https://zfin.org/ZDB-GENE-030131-7275	FK506 binding protein 1Aa [Source:ZFIN;Acc:ZDB-GENE-030131-7275]
1.37149e-15	0.525643	0.856	0.515	1.9061e-11	3	ndufb4	ENSDARG00000019332	https://zfin.org/ZDB-GENE-071015-3	NADH dehydrogenase (ubiquinone) 1 beta subcomplex, 4 [Source:ZFIN;Acc:ZDB-GENE-040426-1973]
1.38174e-15	0.557202	0.621	0.286	1.92034e-11	3	eif5a2	ENSDARG00000056186	https://zfin.org/ZDB-GENE-040426-2405	eukaryotic translation initiation factor 5A2 [Source:ZFIN;Acc:ZDB-GENE-040426-2405]
1.68226e-15	0.267235	0.106	0.014	2.338e-11	3	rab36	ENSDARG00000014058	https://zfin.org/ZDB-GENE-040910-5	RAB36, member RAS oncogene family [Source:ZFIN;Acc:ZDB-GENE-040910-5]
1.92164e-15	0.36092	0.174	0.035	2.6707e-11	3	map9	ENSDARG00000037276	https://zfin.org/ZDB-GENE-080225-36	microtubule-associated protein 9 [Source:ZFIN;Acc:ZDB-GENE-080225-36]
2.11739e-15	0.410259	0.356	0.116	2.94275e-11	3	polr2i	ENSDARG00000040443	https://zfin.org/ZDB-GENE-041010-106	polymerase (RNA) II (DNA directed) polypeptide I [Source:ZFIN;Acc:ZDB-GENE-041010-106]
2.17846e-15	0.457588	0.477	0.185	3.02763e-11	3	snrpa1	ENSDARG00000024651	https://zfin.org/ZDB-GENE-041114-82	small nuclear ribonucleoprotein polypeptide A' [Source:ZFIN;Acc:ZDB-GENE-041114-82]
2.28544e-15	0.44506	0.485	0.19	3.17631e-11	3	ilf3b	ENSDARG00000105177	https://zfin.org/ZDB-GENE-030131-587	interleukin enhancer binding factor 3b [Source:ZFIN;Acc:ZDB-GENE-030131-587]
2.5932e-15	0.273755	0.121	0.018	3.60403e-11	3	cfap53	ENSDARG00000100892	https://zfin.org/ZDB-GENE-060503-508	cilia and flagella associated protein 53 [Source:ZFIN;Acc:ZDB-GENE-060503-508]
2.73039e-15	0.411478	0.364	0.119	3.7947e-11	3	cstf2	ENSDARG00000090788	https://zfin.org/ZDB-GENE-031118-2	cleavage stimulation factor, 3' pre-RNA, subunit 2 [Source:ZFIN;Acc:ZDB-GENE-031118-2]
3.15091e-15	0.376263	0.333	0.104	4.37913e-11	3	vbp1	ENSDARG00000030241	https://zfin.org/ZDB-GENE-050522-494	von Hippel-Lindau binding protein 1 [Source:ZFIN;Acc:ZDB-GENE-050522-494]
3.39246e-15	0.452905	0.447	0.169	4.71484e-11	3	psmd4a.1	ENSDARG00000101295	https://zfin.org/ZDB-GENE-040625-104	proteasome 26S subunit, non-ATPase 4a [Source:ZFIN;Acc:ZDB-GENE-040625-104]
3.50596e-15	-1.11403	0.106	0.436	4.87258e-11	3	tagln2	ENSDARG00000033466	https://zfin.org/ZDB-GENE-020802-2	transgelin 2 [Source:ZFIN;Acc:ZDB-GENE-020802-2]
3.53484e-15	0.410826	0.439	0.16	4.91272e-11	3	rcor1	ENSDARG00000031434	https://zfin.org/ZDB-GENE-050506-79	REST corepressor 1 [Source:ZFIN;Acc:ZDB-GENE-050506-79]
3.62282e-15	0.469622	0.856	0.523	5.035e-11	3	h3f3b.1.1	ENSDARG00000068434	https://zfin.org/ZDB-GENE-050417-65	H3 histone, family 3B.1 [Source:ZFIN;Acc:ZDB-GENE-050417-65]
3.92272e-15	0.486859	0.455	0.171	5.4518e-11	3	FMC1	ENSDARG00000074266	https://zfin.org/ZDB-GENE-120214-41	si:ch1073-314i13.4 [Source:ZFIN;Acc:ZDB-GENE-120214-41]
4.03197e-15	0.321816	0.197	0.044	5.60363e-11	3	tmem107	ENSDARG00000059150	https://zfin.org/ZDB-GENE-040426-2294	transmembrane protein 107 [Source:ZFIN;Acc:ZDB-GENE-040426-2294]
4.30963e-15	0.37264	0.28	0.079	5.98952e-11	3	adipor2	ENSDARG00000101849	https://zfin.org/ZDB-GENE-041210-60	adiponectin receptor 2 [Source:ZFIN;Acc:ZDB-GENE-041210-60]
4.35941e-15	0.470536	0.697	0.355	6.05871e-11	3	cwc15	ENSDARG00000013382	https://zfin.org/ZDB-GENE-040625-10	CWC15 spliceosome-associated protein homolog (S. cerevisiae) [Source:ZFIN;Acc:ZDB-GENE-040625-10]
4.74649e-15	-1.52104	0.129	0.452	6.59667e-11	3	tmem176l.2	ENSDARG00000089399	https://zfin.org/ZDB-GENE-080829-12	transmembrane protein 176l.2 [Source:ZFIN;Acc:ZDB-GENE-080829-12]
5.22682e-15	0.425522	0.364	0.123	7.26423e-11	3	ahcy	ENSDARG00000005191	https://zfin.org/ZDB-GENE-031219-6	adenosylhomocysteinase [Source:ZFIN;Acc:ZDB-GENE-031219-6]
5.46761e-15	0.349946	0.144	0.025	7.59888e-11	3	si:dkey-246i21.1	ENSDARG00000093492	https://zfin.org/ZDB-GENE-090313-271	si:dkey-246i21.1 [Source:ZFIN;Acc:ZDB-GENE-090313-271]
5.63383e-15	0.322419	1	0.966	7.82989e-11	3	rps29	ENSDARG00000041232	https://zfin.org/ZDB-GENE-040622-5	ribosomal protein S29 [Source:ZFIN;Acc:ZDB-GENE-040622-5]
5.63738e-15	-0.385022	0.985	0.995	7.83483e-11	3	epcam	ENSDARG00000040534	https://zfin.org/ZDB-GENE-040426-2209	epithelial cell adhesion molecule [Source:ZFIN;Acc:ZDB-GENE-040426-2209]
5.75609e-15	0.471337	0.705	0.356	7.99982e-11	3	cyc1	ENSDARG00000038075	https://zfin.org/ZDB-GENE-031105-2	cytochrome c-1 [Source:ZFIN;Acc:ZDB-GENE-031105-2]
5.80198e-15	-0.925943	0.136	0.464	8.0636e-11	3	GCA	ENSDARG00000020187	https://zfin.org/ZDB-GENE-040930-3	zgc:92027 [Source:ZFIN;Acc:ZDB-GENE-040930-3]
6.11637e-15	0.560611	0.856	0.611	8.50053e-11	3	si:ch211-286b5.5	ENSDARG00000096661	https://zfin.org/ZDB-GENE-121214-209	si:ch211-286b5.5 [Source:ZFIN;Acc:ZDB-GENE-121214-209]
6.14706e-15	0.50294	0.568	0.263	8.54319e-11	3	chrac1	ENSDARG00000042337	https://zfin.org/ZDB-GENE-050227-18	chromatin accessibility complex 1 [Source:ZFIN;Acc:ZDB-GENE-050227-18]
6.27817e-15	0.43216	0.22	0.054	8.7254e-11	3	nme5	ENSDARG00000041617	https://zfin.org/ZDB-GENE-040718-221	NME/NM23 family member 5 [Source:ZFIN;Acc:ZDB-GENE-040718-221]
6.89946e-15	0.398599	0.364	0.123	9.58887e-11	3	aurkaip1	ENSDARG00000074985	https://zfin.org/ZDB-GENE-070928-24	aurora kinase A interacting protein 1 [Source:ZFIN;Acc:ZDB-GENE-070928-24]
7.237e-15	0.320258	0.197	0.044	1.0058e-10	3	mthfd2	ENSDARG00000098646	https://zfin.org/ZDB-GENE-040704-20	methylenetetrahydrofolate dehydrogenase (NADP+ dependent) 2, methenyltetrahydrofolate cyclohydrolase [Source:ZFIN;Acc:ZDB-GENE-040704-20]
8.79333e-15	0.407513	0.258	0.071	1.2221e-10	3	khdrbs1b	ENSDARG00000070475	https://zfin.org/ZDB-GENE-040426-2344	KH domain containing, RNA binding, signal transduction associated 1b [Source:ZFIN;Acc:ZDB-GENE-040426-2344]
1.01997e-14	0.300792	0.174	0.036	1.41756e-10	3	fam84a	ENSDARG00000018921	https://zfin.org/ZDB-GENE-040426-1247	family with sequence similarity 84, member A [Source:ZFIN;Acc:ZDB-GENE-040426-1247]
1.04528e-14	0.394611	0.205	0.048	1.45273e-10	3	mki67	ENSDARG00000091150	https://zfin.org/ZDB-GENE-030131-9771	marker of proliferation Ki-67 [Source:ZFIN;Acc:ZDB-GENE-030131-9771]
1.08838e-14	-0.58519	0.811	0.863	1.51264e-10	3	ppib	ENSDARG00000092798	https://zfin.org/ZDB-GENE-040426-1955	peptidylprolyl isomerase B (cyclophilin B) [Source:ZFIN;Acc:ZDB-GENE-040426-1955]
1.10753e-14	0.498116	0.765	0.436	1.53924e-10	3	ndufa2	ENSDARG00000021984	https://zfin.org/ZDB-GENE-050522-377	NADH dehydrogenase (ubiquinone) 1 alpha subcomplex, 2 [Source:ZFIN;Acc:ZDB-GENE-050522-377]
1.11179e-14	0.429017	0.932	0.695	1.54516e-10	3	eif3f	ENSDARG00000077533	https://zfin.org/ZDB-GENE-100215-2	eukaryotic translation initiation factor 3, subunit F [Source:ZFIN;Acc:ZDB-GENE-100215-2]
1.11634e-14	0.397773	0.379	0.13	1.55149e-10	3	mrps34	ENSDARG00000057910	https://zfin.org/ZDB-GENE-041114-71	mitochondrial ribosomal protein S34 [Source:ZFIN;Acc:ZDB-GENE-041114-71]
1.15002e-14	0.464734	0.492	0.196	1.59829e-10	3	nfyba	ENSDARG00000039185	https://zfin.org/ZDB-GENE-050417-13	nuclear transcription factor Y, beta a [Source:ZFIN;Acc:ZDB-GENE-050417-13]
1.15086e-14	0.417074	0.477	0.181	1.59947e-10	3	alcamb	ENSDARG00000058538	https://zfin.org/ZDB-GENE-030131-1768	activated leukocyte cell adhesion molecule b [Source:ZFIN;Acc:ZDB-GENE-030131-1768]
1.31215e-14	0.422725	0.364	0.124	1.82362e-10	3	gnai1	ENSDARG00000021647	https://zfin.org/ZDB-GENE-040426-1310	guanine nucleotide binding protein (G protein), alpha inhibiting activity polypeptide 1 [Source:ZFIN;Acc:ZDB-GENE-040426-1310]
1.33243e-14	0.267028	0.129	0.021	1.85182e-10	3	ncapg	ENSDARG00000070109	https://zfin.org/ZDB-GENE-041111-282	non-SMC condensin I complex, subunit G [Source:ZFIN;Acc:ZDB-GENE-041111-282]
1.35992e-14	0.531542	0.121	0.019	1.89002e-10	3	si:ch211-69g19.2	ENSDARG00000070656	https://zfin.org/ZDB-GENE-030804-13	si:ch211-69g19.2 [Source:ZFIN;Acc:ZDB-GENE-030804-13]
1.39315e-14	0.518002	0.561	0.25	1.9362e-10	3	ptges3b	ENSDARG00000089626	https://zfin.org/ZDB-GENE-040625-144	prostaglandin E synthase 3b (cytosolic) [Source:ZFIN;Acc:ZDB-GENE-040625-144]
1.40277e-14	-1.01198	0.083	0.414	1.94957e-10	3	cadm4	ENSDARG00000040291	https://zfin.org/ZDB-GENE-041114-138	cell adhesion molecule 4 [Source:ZFIN;Acc:ZDB-GENE-041114-138]
1.47676e-14	0.474542	0.508	0.211	2.0524e-10	3	fgf10a	ENSDARG00000030932	https://zfin.org/ZDB-GENE-030715-1	fibroblast growth factor 10a [Source:ZFIN;Acc:ZDB-GENE-030715-1]
1.56832e-14	0.460966	0.72	0.372	2.17965e-10	3	USMG5	ENSDARG00000096003	https://zfin.org/ZDB-GENE-110914-234	si:dkeyp-80c12.10 [Source:ZFIN;Acc:ZDB-GENE-110914-234]
1.60746e-14	0.508712	0.379	0.137	2.23405e-10	3	chchd6b	ENSDARG00000045978	https://zfin.org/ZDB-GENE-041114-95	coiled-coil-helix-coiled-coil-helix domain containing 6b [Source:ZFIN;Acc:ZDB-GENE-041114-95]
1.7445e-14	0.454126	0.333	0.11	2.42451e-10	3	ssbp3b	ENSDARG00000030155	https://zfin.org/ZDB-GENE-040426-2801	single stranded DNA binding protein 3b [Source:ZFIN;Acc:ZDB-GENE-040426-2801]
1.76201e-14	0.544424	0.394	0.143	2.44884e-10	3	susd6	ENSDARG00000030116	https://zfin.org/ZDB-GENE-030131-8832	sushi domain containing 6 [Source:ZFIN;Acc:ZDB-GENE-030131-8832]
1.95176e-14	0.306968	0.25	0.068	2.71255e-10	3	aifm4	ENSDARG00000061634	https://zfin.org/ZDB-GENE-070112-2282	apoptosis-inducing factor, mitochondrion-associated, 4 [Source:ZFIN;Acc:ZDB-GENE-070112-2282]
2.09139e-14	-1.04072	0.341	0.579	2.90661e-10	3	sepw2b	ENSDARG00000089936	https://zfin.org/ZDB-GENE-030428-2	selenoprotein W, 2b [Source:ZFIN;Acc:ZDB-GENE-030428-2]
2.37772e-14	0.498092	0.568	0.259	3.30456e-10	3	cops4	ENSDARG00000043732	https://zfin.org/ZDB-GENE-030131-4317	COP9 constitutive photomorphogenic homolog subunit 4 (Arabidopsis) [Source:ZFIN;Acc:ZDB-GENE-030131-4317]
2.49837e-14	-1.10024	0.167	0.466	3.47223e-10	3	six2a	ENSDARG00000058004	https://zfin.org/ZDB-GENE-010412-1	SIX homeobox 2a [Source:ZFIN;Acc:ZDB-GENE-010412-1]
2.78592e-14	-1.18146	0.379	0.617	3.87187e-10	3	hopx	ENSDARG00000089368	https://zfin.org/ZDB-GENE-031016-2	HOP homeobox [Source:ZFIN;Acc:ZDB-GENE-031016-2]
2.88642e-14	0.479961	0.568	0.254	4.01155e-10	3	TSTD1	ENSDARG00000071567	https://zfin.org/ZDB-GENE-081107-63	si:dkey-34l15.1 [Source:ZFIN;Acc:ZDB-GENE-081107-63]
3.03327e-14	0.61876	0.576	0.278	4.21564e-10	3	ap1s1	ENSDARG00000056803	https://zfin.org/ZDB-GENE-040426-1119	adaptor-related protein complex 1, sigma 1 subunit [Source:ZFIN;Acc:ZDB-GENE-040426-1119]
3.09081e-14	0.423141	0.644	0.306	4.29561e-10	3	snrpd3	ENSDARG00000013800	https://zfin.org/ZDB-GENE-040625-55	small nuclear ribonucleoprotein D3 polypeptide [Source:ZFIN;Acc:ZDB-GENE-040625-55]
3.1258e-14	0.42544	0.333	0.11	4.34423e-10	3	got2b	ENSDARG00000005840	https://zfin.org/ZDB-GENE-030131-7917	glutamic-oxaloacetic transaminase 2b, mitochondrial [Source:ZFIN;Acc:ZDB-GENE-030131-7917]
3.2307e-14	0.378541	0.197	0.046	4.49003e-10	3	lbr	ENSDARG00000014013	https://zfin.org/ZDB-GENE-030804-11	lamin B receptor [Source:ZFIN;Acc:ZDB-GENE-030804-11]
3.27112e-14	0.299264	0.136	0.024	4.54621e-10	3	cyb5d1	ENSDARG00000056007	https://zfin.org/ZDB-GENE-050417-173	cytochrome b5 domain containing 1 [Source:ZFIN;Acc:ZDB-GENE-050417-173]
3.30102e-14	0.261546	0.129	0.021	4.58775e-10	3	miip	ENSDARG00000088346	https://zfin.org/ZDB-GENE-130620-1	migration and invasion inhibitory protein [Source:ZFIN;Acc:ZDB-GENE-130620-1]
3.42859e-14	0.42472	0.53	0.22	4.76506e-10	3	eif3s6ip	ENSDARG00000101082	https://zfin.org/ZDB-GENE-040426-2138	eukaryotic translation initiation factor 3, subunit 6 interacting protein [Source:ZFIN;Acc:ZDB-GENE-040426-2138]
3.69273e-14	0.437277	0.735	0.37	5.13215e-10	3	u2af1	ENSDARG00000015325	https://zfin.org/ZDB-GENE-020419-1	U2 small nuclear RNA auxiliary factor 1 [Source:ZFIN;Acc:ZDB-GENE-020419-1]
3.72168e-14	0.539813	0.606	0.298	5.1724e-10	3	hn1b	ENSDARG00000099312	https://zfin.org/ZDB-GENE-030131-2784	hematological and neurological expressed 1b [Source:ZFIN;Acc:ZDB-GENE-030131-2784]
4.09062e-14	0.273147	0.136	0.024	5.68515e-10	3	btbd10a	ENSDARG00000062674	https://zfin.org/ZDB-GENE-070410-41	BTB (POZ) domain containing 10a [Source:ZFIN;Acc:ZDB-GENE-070410-41]
4.17121e-14	0.291801	0.227	0.057	5.79714e-10	3	hsd17b7	ENSDARG00000088140	https://zfin.org/ZDB-GENE-061013-378	hydroxysteroid (17-beta) dehydrogenase 7 [Source:ZFIN;Acc:ZDB-GENE-061013-378]
4.21035e-14	0.319853	0.189	0.042	5.85155e-10	3	tiparp	ENSDARG00000061841	https://zfin.org/ZDB-GENE-031002-47	TCDD-inducible poly(ADP-ribose) polymerase [Source:ZFIN;Acc:ZDB-GENE-031002-47]
4.47385e-14	0.37805	0.28	0.083	6.21775e-10	3	thoc3	ENSDARG00000056517	https://zfin.org/ZDB-GENE-040808-14	THO complex 3 [Source:ZFIN;Acc:ZDB-GENE-040808-14]
4.98448e-14	0.264897	0.121	0.019	6.92743e-10	3	ndc80	ENSDARG00000071694	https://zfin.org/ZDB-GENE-030131-904	NDC80 kinetochore complex component [Source:ZFIN;Acc:ZDB-GENE-030131-904]
5.00475e-14	0.511724	0.265	0.075	6.9556e-10	3	otofb	ENSDARG00000020581	https://zfin.org/ZDB-GENE-110406-5	otoferlin b [Source:ZFIN;Acc:ZDB-GENE-110406-5]
5.35387e-14	-1.25735	0.114	0.423	7.44081e-10	3	si:dkey-33m11.8	ENSDARG00000055014	https://zfin.org/ZDB-GENE-141215-49	si:dkey-33m11.8 [Source:ZFIN;Acc:ZDB-GENE-141215-49]
5.54477e-14	0.466949	0.758	0.406	7.70612e-10	3	lsm8	ENSDARG00000091656	https://zfin.org/ZDB-GENE-070629-3	LSM8 homolog, U6 small nuclear RNA associated [Source:ZFIN;Acc:ZDB-GENE-070629-3]
6.08678e-14	0.276957	1	0.978	8.45941e-10	3	rpl3	ENSDARG00000003599	https://zfin.org/ZDB-GENE-030131-1291	ribosomal protein L3 [Source:ZFIN;Acc:ZDB-GENE-030131-1291]
6.26078e-14	0.511866	0.417	0.154	8.70123e-10	3	hnrnpm	ENSDARG00000061735	https://zfin.org/ZDB-GENE-030131-6898	heterogeneous nuclear ribonucleoprotein M [Source:ZFIN;Acc:ZDB-GENE-030131-6898]
6.40449e-14	0.449171	0.871	0.626	8.90096e-10	3	slc25a3b	ENSDARG00000025566	https://zfin.org/ZDB-GENE-040426-1916	solute carrier family 25 (mitochondrial carrier; phosphate carrier), member 3b [Source:ZFIN;Acc:ZDB-GENE-040426-1916]
6.50861e-14	0.475509	0.5	0.206	9.04567e-10	3	cfap20	ENSDARG00000100514	https://zfin.org/ZDB-GENE-040426-1784	cilia and flagella associated protein 20 [Source:ZFIN;Acc:ZDB-GENE-040426-1784]
6.71961e-14	0.475413	0.72	0.388	9.33891e-10	3	eif3ea	ENSDARG00000090697	https://zfin.org/ZDB-GENE-030131-3827	eukaryotic translation initiation factor 3, subunit E, a [Source:ZFIN;Acc:ZDB-GENE-030131-3827]
7.20827e-14	0.302246	0.318	0.099	1.0018e-09	3	nfybb	ENSDARG00000045611	https://zfin.org/ZDB-GENE-050306-25	nuclear transcription factor Y, beta b [Source:ZFIN;Acc:ZDB-GENE-050306-25]
7.24394e-14	0.377751	0.386	0.139	1.00676e-09	3	snrpb2	ENSDARG00000039424	https://zfin.org/ZDB-GENE-060616-2	small nuclear ribonucleoprotein polypeptide B2 [Source:ZFIN;Acc:ZDB-GENE-060616-2]
7.99312e-14	0.376274	0.386	0.137	1.11088e-09	3	zgc:56106	ENSDARG00000022564	https://zfin.org/ZDB-GENE-040426-904	zgc:56106 [Source:ZFIN;Acc:ZDB-GENE-040426-904]
8.18573e-14	0.349715	0.364	0.125	1.13765e-09	3	pdcl	ENSDARG00000009480	https://zfin.org/ZDB-GENE-030131-2365	phosducin-like [Source:ZFIN;Acc:ZDB-GENE-030131-2365]
8.23016e-14	0.37533	0.515	0.21	1.14383e-09	3	atp6v1g1	ENSDARG00000022315	https://zfin.org/ZDB-GENE-030131-6965	ATPase, H+ transporting, lysosomal, V1 subunit G1 [Source:ZFIN;Acc:ZDB-GENE-030131-6965]
8.27637e-14	0.320234	0.341	0.111	1.15025e-09	3	cdk7	ENSDARG00000051916	https://zfin.org/ZDB-GENE-010320-2	cyclin-dependent kinase 7 [Source:ZFIN;Acc:ZDB-GENE-010320-2]
8.35463e-14	0.258795	1	0.982	1.16113e-09	3	rps16	ENSDARG00000045487	https://zfin.org/ZDB-GENE-050506-107	ribosomal protein S16 [Source:ZFIN;Acc:ZDB-GENE-050506-107]
8.44971e-14	0.277336	0.159	0.032	1.17434e-09	3	pde6d	ENSDARG00000074892	https://zfin.org/ZDB-GENE-040718-463	phosphodiesterase 6D, cGMP-specific, rod, delta [Source:ZFIN;Acc:ZDB-GENE-040718-463]
9.08252e-14	0.27016	0.992	0.951	1.26229e-09	3	faua	ENSDARG00000099022	https://zfin.org/ZDB-GENE-040426-1700	Finkel-Biskis-Reilly murine sarcoma virus (FBR-MuSV) ubiquitously expressed a [Source:ZFIN;Acc:ZDB-GENE-040426-1700]
9.23734e-14	0.282696	1	0.964	1.28381e-09	3	rps18	ENSDARG00000100392	https://zfin.org/ZDB-GENE-020419-20	ribosomal protein S18 [Source:ZFIN;Acc:ZDB-GENE-020419-20]
9.26827e-14	0.654768	0.273	0.083	1.2881e-09	3	gadd45ga	ENSDARG00000019417	https://zfin.org/ZDB-GENE-040426-1882	growth arrest and DNA-damage-inducible, gamma a [Source:ZFIN;Acc:ZDB-GENE-040426-1882]
9.42245e-14	0.412994	0.492	0.204	1.30953e-09	3	ptges3a	ENSDARG00000037284	https://zfin.org/ZDB-GENE-040426-2200	prostaglandin E synthase 3a (cytosolic) [Source:ZFIN;Acc:ZDB-GENE-040426-2200]
9.5782e-14	-1.10348	0.106	0.419	1.33118e-09	3	ccnd2a	ENSDARG00000051748	https://zfin.org/ZDB-GENE-070424-30	cyclin D2, a [Source:ZFIN;Acc:ZDB-GENE-070424-30]
9.62757e-14	0.26012	1	0.987	1.33804e-09	3	rpl7a	ENSDARG00000019230	https://zfin.org/ZDB-GENE-031001-9	ribosomal protein L7a [Source:ZFIN;Acc:ZDB-GENE-031001-9]
9.77962e-14	0.371534	0.394	0.144	1.35917e-09	3	med21	ENSDARG00000026839	https://zfin.org/ZDB-GENE-040426-2763	mediator complex subunit 21 [Source:ZFIN;Acc:ZDB-GENE-040426-2763]
1.03891e-13	0.296473	0.114	0.018	1.44388e-09	3	klhdc7a	ENSDARG00000105322	https://zfin.org/ZDB-GENE-160114-44	kelch domain containing 7A [Source:ZFIN;Acc:ZDB-GENE-160114-44]
1.06389e-13	0.427438	0.379	0.138	1.4786e-09	3	txnl1	ENSDARG00000011921	https://zfin.org/ZDB-GENE-040426-701	thioredoxin-like 1 [Source:ZFIN;Acc:ZDB-GENE-040426-701]
1.08349e-13	0.379368	0.5	0.204	1.50584e-09	3	med11	ENSDARG00000086416	https://zfin.org/ZDB-GENE-091207-2	mediator complex subunit 11 [Source:ZFIN;Acc:ZDB-GENE-091207-2]
1.10687e-13	-1.04807	0.159	0.475	1.53833e-09	3	gstm.1	ENSDARG00000042533	https://zfin.org/ZDB-GENE-030911-2	glutathione S-transferase mu, tandem duplicate 1 [Source:ZFIN;Acc:ZDB-GENE-030911-2]
1.15813e-13	0.285928	0.152	0.03	1.60957e-09	3	nrf1	ENSDARG00000000018	https://zfin.org/ZDB-GENE-001221-1	nuclear respiratory factor 1 [Source:ZFIN;Acc:ZDB-GENE-001221-1]
1.20113e-13	0.344855	0.992	0.881	1.66933e-09	3	rps25	ENSDARG00000041811	https://zfin.org/ZDB-GENE-040426-1788	ribosomal protein S25 [Source:ZFIN;Acc:ZDB-GENE-040426-1788]
1.22737e-13	0.312907	0.333	0.109	1.7058e-09	3	mapre1b	ENSDARG00000002659	https://zfin.org/ZDB-GENE-040426-2256	microtubule-associated protein, RP/EB family, member 1b [Source:ZFIN;Acc:ZDB-GENE-040426-2256]
1.23538e-13	0.359301	0.25	0.07	1.71694e-09	3	caprin1a	ENSDARG00000009346	https://zfin.org/ZDB-GENE-040801-226	cell cycle associated protein 1a [Source:ZFIN;Acc:ZDB-GENE-040801-226]
1.26866e-13	0.332278	0.205	0.051	1.76318e-09	3	tmem53	ENSDARG00000038789	https://zfin.org/ZDB-GENE-040718-384	transmembrane protein 53 [Source:ZFIN;Acc:ZDB-GENE-040718-384]
1.32132e-13	0.36374	0.386	0.139	1.83637e-09	3	c1d	ENSDARG00000021112	https://zfin.org/ZDB-GENE-041024-8	C1D nuclear receptor corepressor [Source:ZFIN;Acc:ZDB-GENE-041024-8]
1.41716e-13	0.493553	0.985	0.825	1.96957e-09	3	h3f3a	ENSDARG00000020504	https://zfin.org/ZDB-GENE-050417-65	H3 histone, family 3A [Source:ZFIN;Acc:ZDB-GENE-040426-1928]
1.49182e-13	0.483266	0.598	0.279	2.07333e-09	3	CABZ01111915.1	ENSDARG00000104583	https://zfin.org/
1.56721e-13	0.489613	0.758	0.435	2.17811e-09	3	eif2s2	ENSDARG00000053047	https://zfin.org/ZDB-GENE-030131-3085	eukaryotic translation initiation factor 2, subunit 2 beta [Source:ZFIN;Acc:ZDB-GENE-030131-3085]
1.63412e-13	0.39041	0.424	0.161	2.2711e-09	3	trappc2l	ENSDARG00000100109	https://zfin.org/ZDB-GENE-040801-249	trafficking protein particle complex 2-like [Source:ZFIN;Acc:ZDB-GENE-040801-249]
1.87406e-13	0.352287	0.227	0.06	2.60457e-09	3	ndufaf2	ENSDARG00000069286	https://zfin.org/ZDB-GENE-040808-28	NADH dehydrogenase (ubiquinone) complex I, assembly factor 2 [Source:ZFIN;Acc:ZDB-GENE-040808-28]
1.9105e-13	0.362771	0.318	0.103	2.65521e-09	3	ubtf	ENSDARG00000035066	https://zfin.org/ZDB-GENE-030616-252	upstream binding transcription factor, RNA polymerase I [Source:ZFIN;Acc:ZDB-GENE-030616-252]
2.22347e-13	0.367376	0.121	0.021	3.09018e-09	3	gpr156	ENSDARG00000086215	https://zfin.org/ZDB-GENE-060201-2	G protein-coupled receptor 156 [Source:ZFIN;Acc:ZDB-GENE-060201-2]
2.24948e-13	0.260846	1	0.974	3.12633e-09	3	rpl15	ENSDARG00000009285	https://zfin.org/ZDB-GENE-040801-183	ribosomal protein L15 [Source:ZFIN;Acc:ZDB-GENE-040801-183]
2.49573e-13	0.322186	0.174	0.039	3.46857e-09	3	sclt1	ENSDARG00000057248	https://zfin.org/ZDB-GENE-030131-3278	sodium channel and clathrin linker 1 [Source:ZFIN;Acc:ZDB-GENE-030131-3278]
2.68419e-13	0.487103	0.53	0.246	3.73048e-09	3	ewsr1b	ENSDARG00000020465	https://zfin.org/ZDB-GENE-030131-1600	EWS RNA-binding protein 1b [Source:ZFIN;Acc:ZDB-GENE-030131-1600]
2.74355e-13	0.320328	0.25	0.071	3.81299e-09	3	hnrpl	ENSDARG00000035324	https://zfin.org/ZDB-GENE-040426-710	heterogeneous nuclear ribonucleoprotein L [Source:ZFIN;Acc:ZDB-GENE-040426-710]
2.98595e-13	0.264493	0.174	0.039	4.14988e-09	3	eftud2	ENSDARG00000012261	https://zfin.org/ZDB-GENE-040426-1569	elongation factor Tu GTP binding domain containing 2 [Source:ZFIN;Acc:ZDB-GENE-040426-1569]
3.05938e-13	0.359394	0.341	0.118	4.25193e-09	3	MRPL55	ENSDARG00000043402	https://zfin.org/ZDB-GENE-080204-83	zgc:171480 [Source:ZFIN;Acc:ZDB-GENE-080204-83]
3.1628e-13	0.531683	0.22	0.06	4.39566e-09	3	birc5a	ENSDARG00000075621	https://zfin.org/ZDB-GENE-030826-1	baculoviral IAP repeat containing 5a [Source:ZFIN;Acc:ZDB-GENE-030826-1]
3.36234e-13	0.449881	0.576	0.264	4.67298e-09	3	tfg	ENSDARG00000003641	https://zfin.org/ZDB-GENE-030131-8410	trk-fused gene [Source:ZFIN;Acc:ZDB-GENE-030131-8410]
3.37537e-13	0.327163	0.227	0.061	4.69109e-09	3	usp39	ENSDARG00000041908	https://zfin.org/ZDB-GENE-030131-966	ubiquitin specific peptidase 39 [Source:ZFIN;Acc:ZDB-GENE-030131-966]
3.41551e-13	0.268251	0.197	0.049	4.74688e-09	3	ap3m2	ENSDARG00000016128	https://zfin.org/ZDB-GENE-021022-2	adaptor-related protein complex 3, mu 2 subunit [Source:ZFIN;Acc:ZDB-GENE-021022-2]
3.53324e-13	0.354008	0.129	0.023	4.91049e-09	3	cks2	ENSDARG00000071410	https://zfin.org/ZDB-GENE-050208-508	CDC28 protein kinase regulatory subunit 2 [Source:ZFIN;Acc:ZDB-GENE-050208-508]
3.88653e-13	0.298442	0.303	0.096	5.4015e-09	3	med19b	ENSDARG00000009472	https://zfin.org/ZDB-GENE-040727-4	mediator complex subunit 19b [Source:ZFIN;Acc:ZDB-GENE-040727-4]
3.92603e-13	0.486404	0.47	0.198	5.4564e-09	3	puf60b	ENSDARG00000001241	https://zfin.org/ZDB-GENE-040625-116	poly-U binding splicing factor b [Source:ZFIN;Acc:ZDB-GENE-040625-116]
4.21092e-13	0.369204	0.333	0.114	5.85234e-09	3	ift20	ENSDARG00000040556	https://zfin.org/ZDB-GENE-040614-2	intraflagellar transport 20 homolog (Chlamydomonas) [Source:ZFIN;Acc:ZDB-GENE-040614-2]
4.25161e-13	0.361805	0.227	0.062	5.90889e-09	3	wdr18	ENSDARG00000041113	https://zfin.org/ZDB-GENE-040905-4	WD repeat domain 18 [Source:ZFIN;Acc:ZDB-GENE-040905-4]
4.25592e-13	0.355766	0.977	0.853	5.91488e-09	3	rpl13a	ENSDARG00000044093	https://zfin.org/ZDB-GENE-030131-168	ribosomal protein L13a [Source:ZFIN;Acc:ZDB-GENE-030131-168]
4.4998e-13	0.356721	0.47	0.19	6.25382e-09	3	eif3ja	ENSDARG00000012603	https://zfin.org/ZDB-GENE-040426-1266	eukaryotic translation initiation factor 3, subunit Ja [Source:ZFIN;Acc:ZDB-GENE-040426-1266]
4.70332e-13	0.290471	1	0.953	6.53668e-09	3	rpl10	ENSDARG00000025581	https://zfin.org/ZDB-GENE-030131-8656	ribosomal protein L10 [Source:ZFIN;Acc:ZDB-GENE-030131-8656]
4.74902e-13	0.27795	0.212	0.054	6.60018e-09	3	ddx49	ENSDARG00000012899	https://zfin.org/ZDB-GENE-031030-3	DEAD (Asp-Glu-Ala-Asp) box polypeptide 49 [Source:ZFIN;Acc:ZDB-GENE-031030-3]
4.76241e-13	0.290321	0.235	0.063	6.6188e-09	3	dnajc5b	ENSDARG00000058147	https://zfin.org/ZDB-GENE-050413-1	DnaJ (Hsp40) homolog, subfamily C, member 5 beta [Source:ZFIN;Acc:ZDB-GENE-050413-1]
[truncated: 2,356 more rows]
