# Supplementary material for: scRNA-Seq reveals distinct stem cell populations that drive hair cell regeneration after loss of Fgf and Notch signaling
Source: eLife journal article supplement (doi:10.7554/elife.44431), 2019-01-25
Supplement: supp [file elife-44431-supp-v1.zip › elife_poa_e44431_Supplementary_File_15.xlsx]

## Sheet: Sheet1
RT-qPCR primer list
Gene	Forward (5'-3')	Reverse (5'-3')
adcyap1b	GATGCACTACAGCGCCTACT	GTGCCAAAAGCCAGGTCG
cdkn1bb	GTCTCGCTCATCGTGTCAAA	TATGTGGGTGTCGGACTCAA
eef1a1l1	CTGGAGGCCAGCTCAAACAT	ATCAAGAAGAGTAGTACCGCTAGCATTA
fgf10a	TTCTCCCCATTCCTATCGTG	TGCCTTCTTCTCCAAATGGT
fsta	CTAAAGCGTCAGCAGCTCCA	TGACATCTCCCGTTCTTGCC
isl1	CATGTTTTGTGCGAGACGGG	AACCTTCGAACGTGCTCTCA
jun	CACCGCTCTCTCCTATCGAC	AGTTTCCTCTTCCGGCATTT
krt92	ACTGCTGGATGGAGAGGCTA	TTGGGAGGATGAGCTGACCA
otofb	GCCTGGCAAGAAGAGTTTTG	CTGCCTTGTTCTCCTCGAAC
si:ch73-261i21.5	CACTCGAGAAGAAACCAGGACA	GGGTGGATCACTCACGCTAC
sostdc1b	CAACGGAGGAAGAAGACCAG	GACATTCACCAGCACACACC
wnt10a	CGCTGGAACTGCTCAAGTTT	CATGGCACAGGCATTAGACA
