# Supplementary material for: scRNA-Seq reveals distinct stem cell populations that drive hair cell regeneration after loss of Fgf and Notch signaling
Source: eLife journal article supplement (doi:10.7554/elife.44431), 2019-01-25

Figure 6-figure supplement 1

Homeostasis

*hs* sibling

A

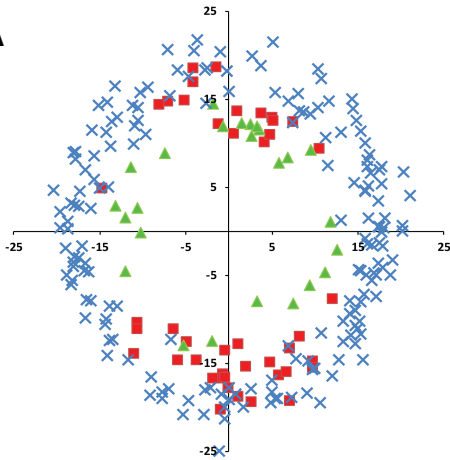

A'

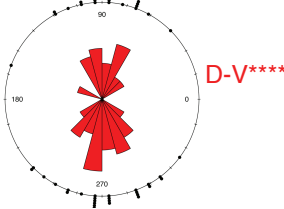

A''

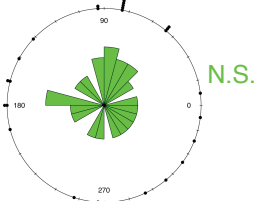

*hs:dnfgfr*

B

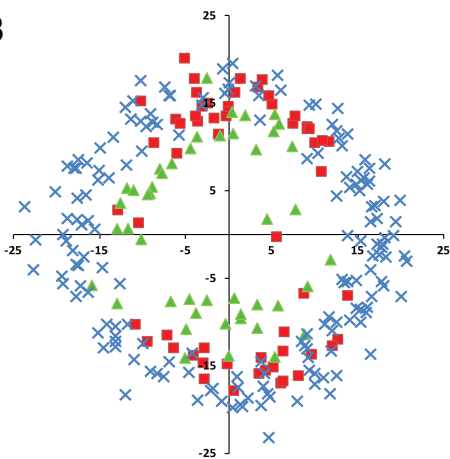

B'

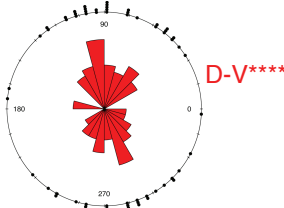

B''

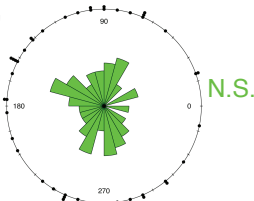

Amplifying Divisions      Differentiation Divisions      Quiescent Mantle Cells

EdU Index

C

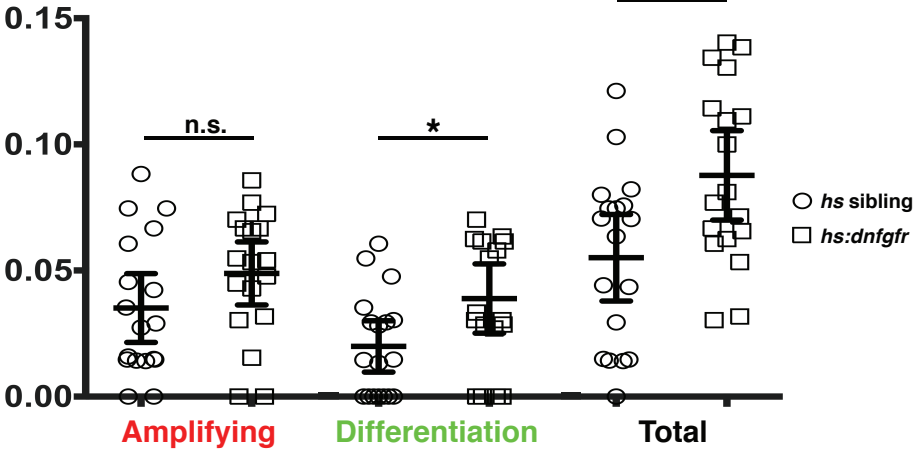

Supplement: supp [file elife_poa_e44431_Figure_6_figure_supplement_1.pdf › elife_poa_e44431_Figure_6_figure_supplement_1.pdf]
