# Supplementary figures and images for: scRNA-Seq reveals distinct stem cell populations that drive hair cell regeneration after loss of Fgf and Notch signaling
Source: eLife journal article supplement (doi:10.7554/elife.44431), 2019-01-25

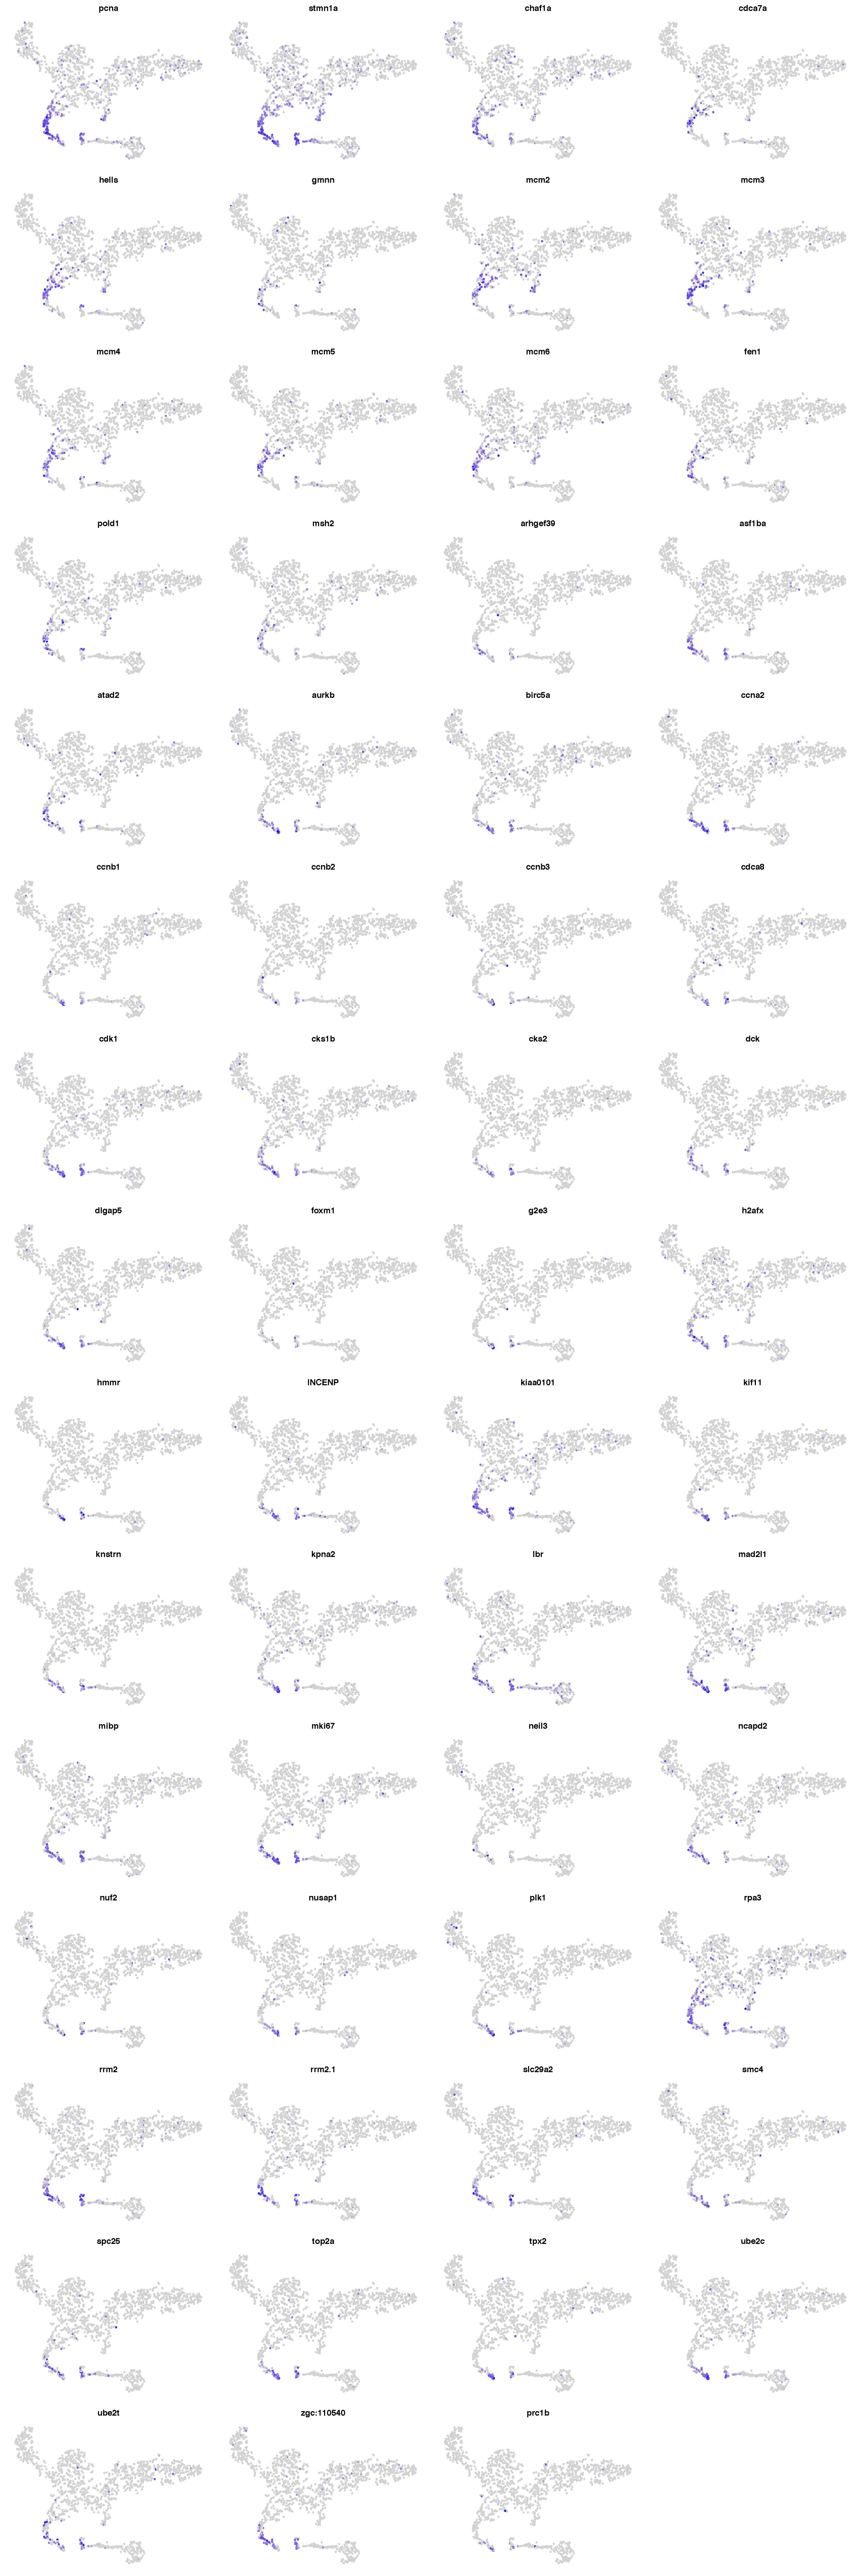

Supplement: supp [file elife-44431-supp-v1.zip › elife_poa_e44431_Supplementary_File_5.jpg]

Figure 3-figure supplement 1

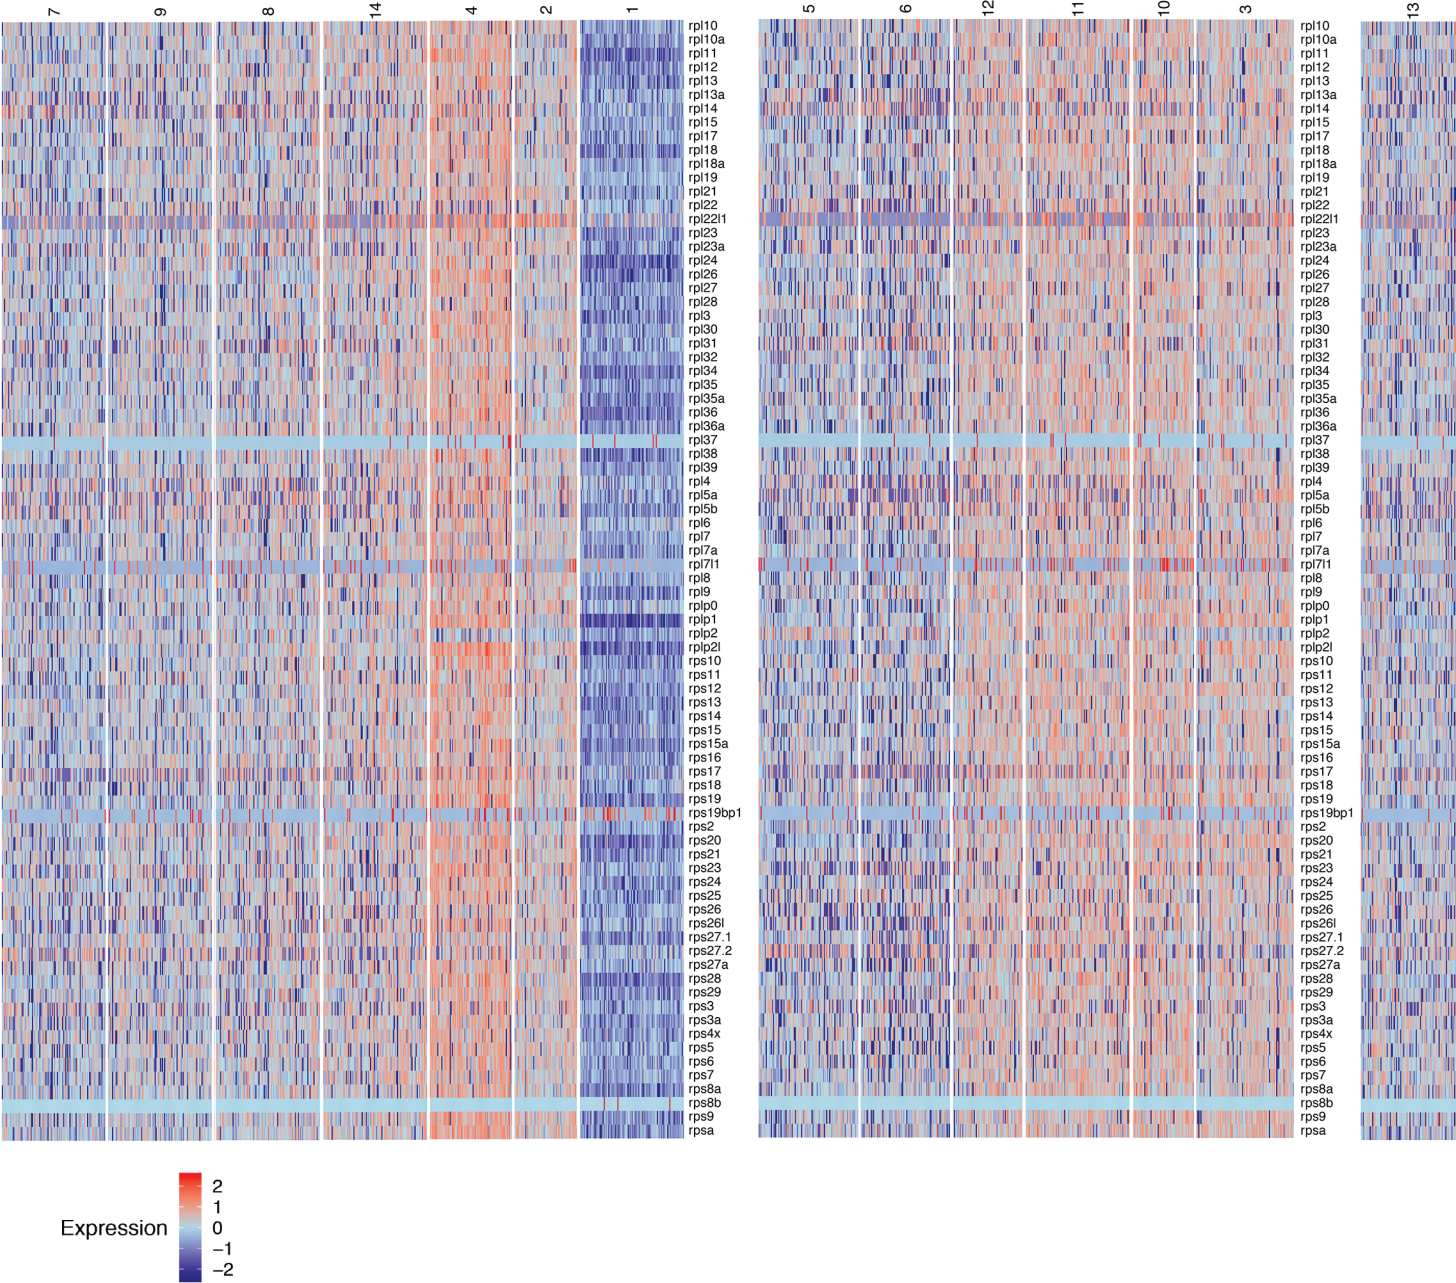

Supplement: supp [file elife-44431-supp-v1.zip › elife_poa_e44431_Figure_3_figure_supplement_1.pdf]

Figure 4-figure supplement 3

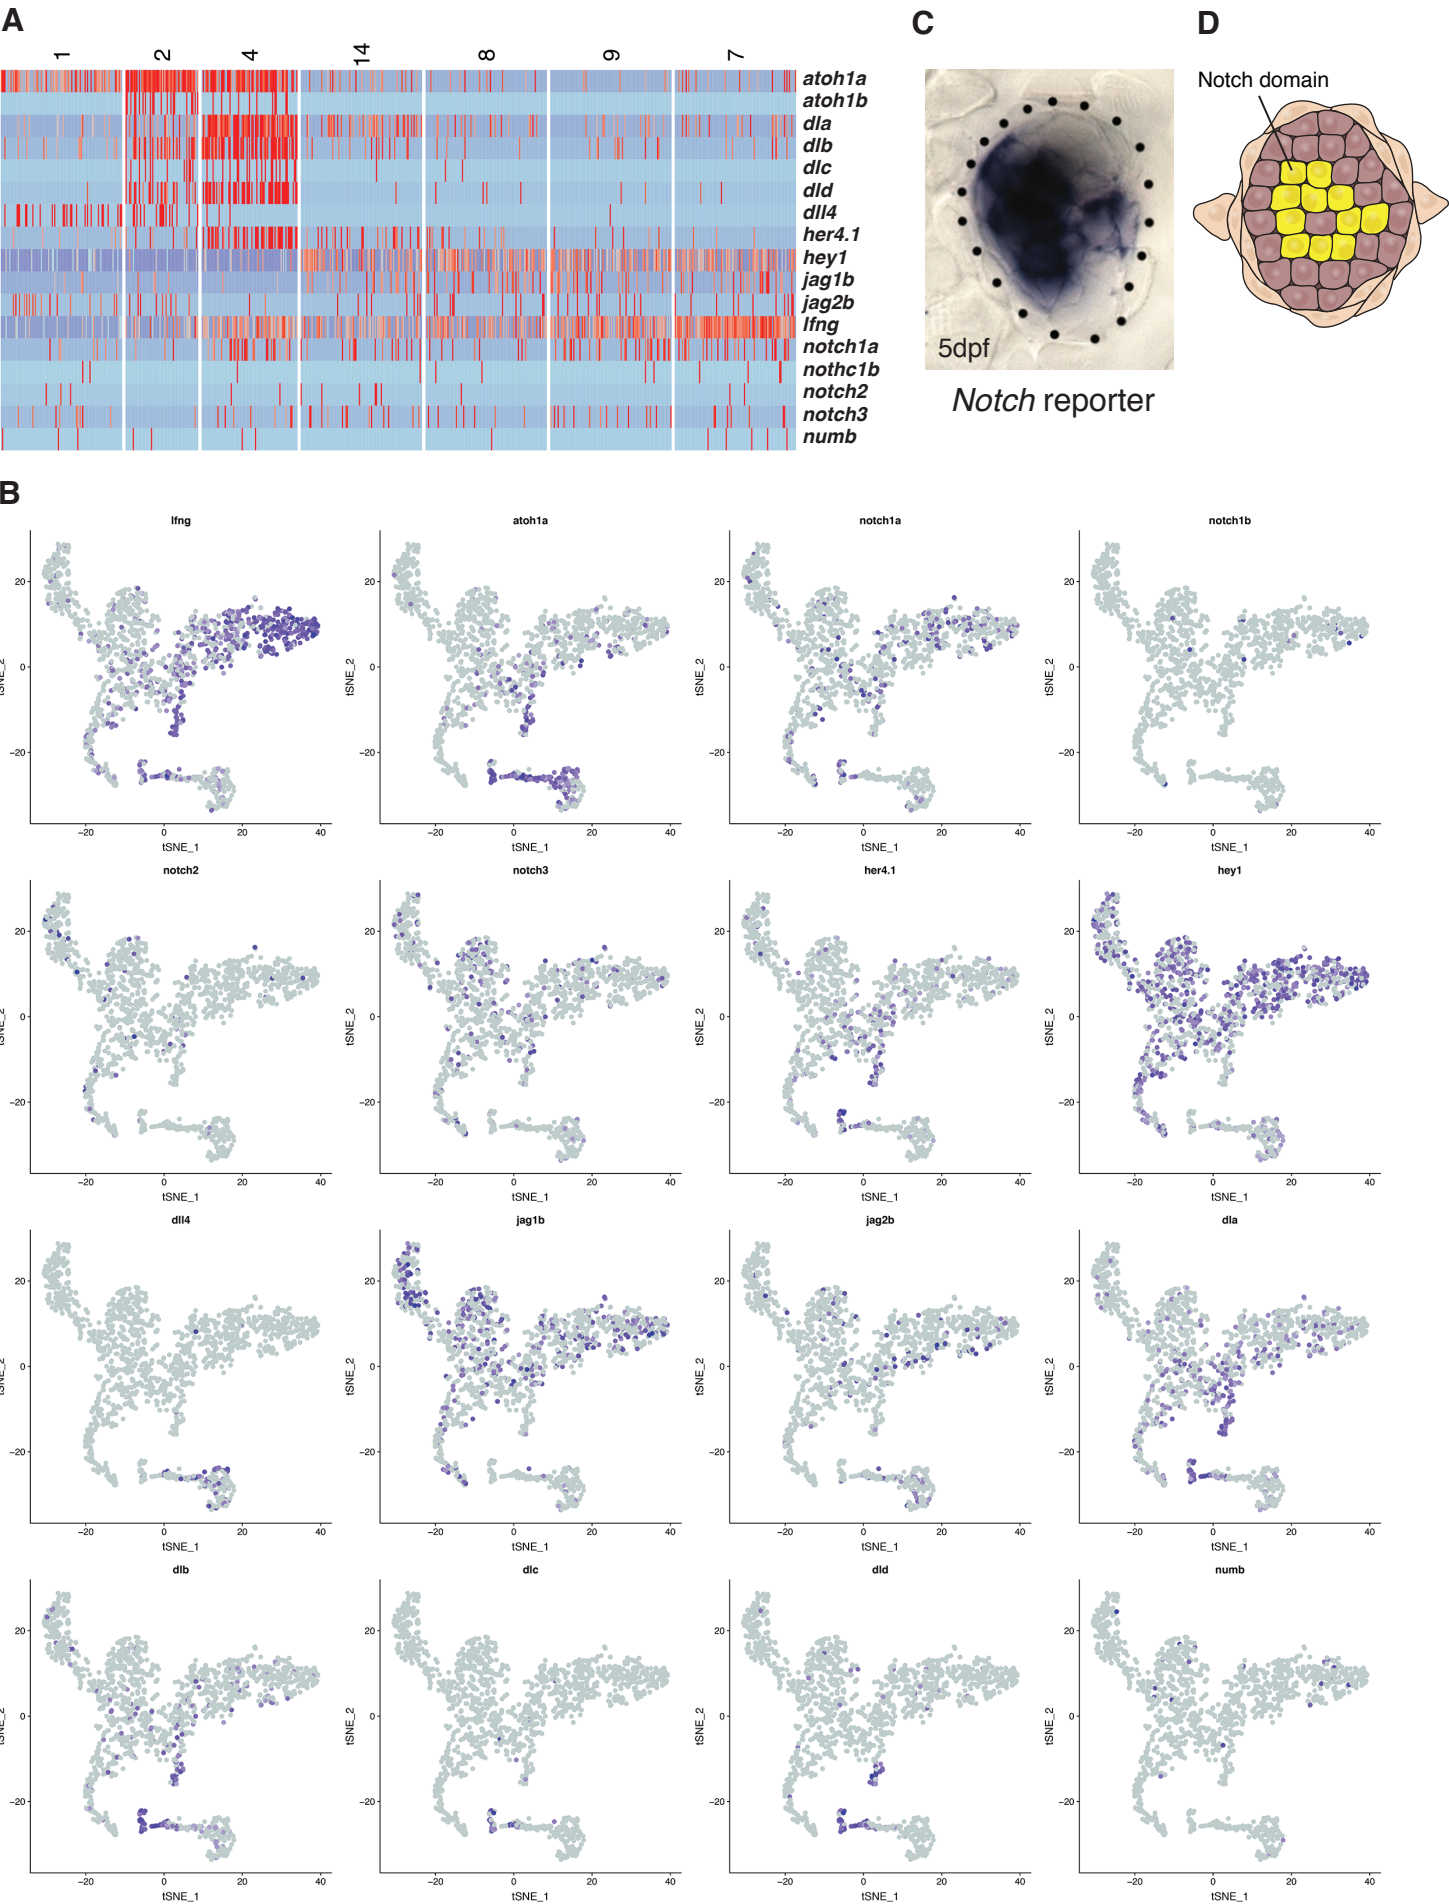

Supplement: supp [file elife-44431-supp-v1.zip › elife_poa_e44431_Figure_4_figure_supplement_3.pdf]

Figure 4-figure supplement 1

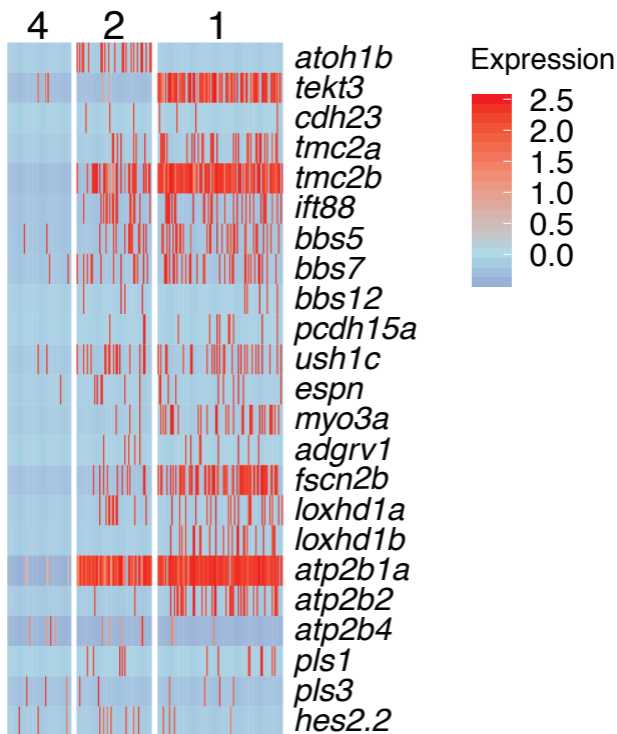

Supplement: supp [file elife-44431-supp-v1.zip › elife_poa_e44431_Figure_4_figure_supplement_1.pdf]

Figure 2-figure supplement 2

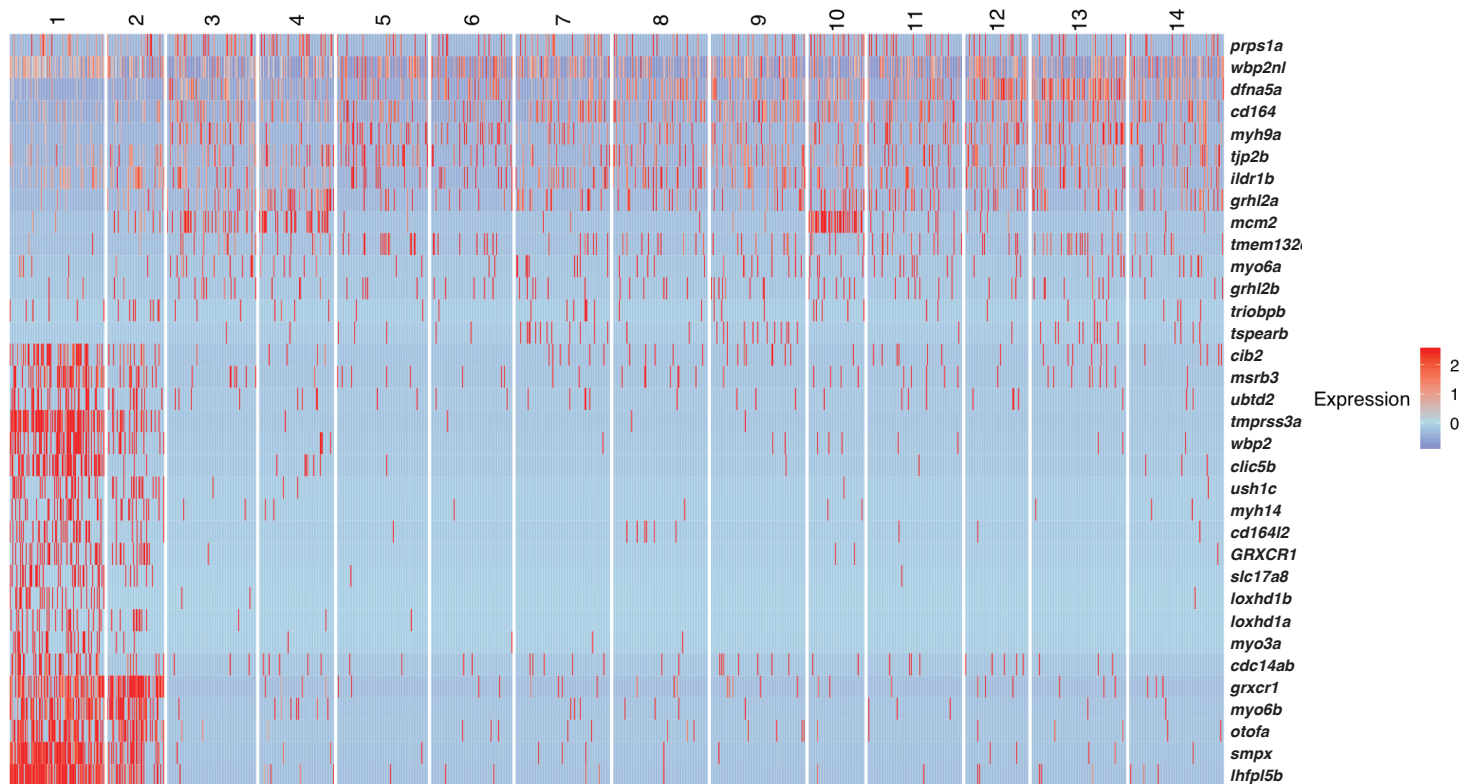

Supplement: supp [file elife-44431-supp-v1.zip › elife_poa_e44431_Figure_2_figure_supplement_2.pdf]

Figure 6-figure supplement 1

Homeostasis

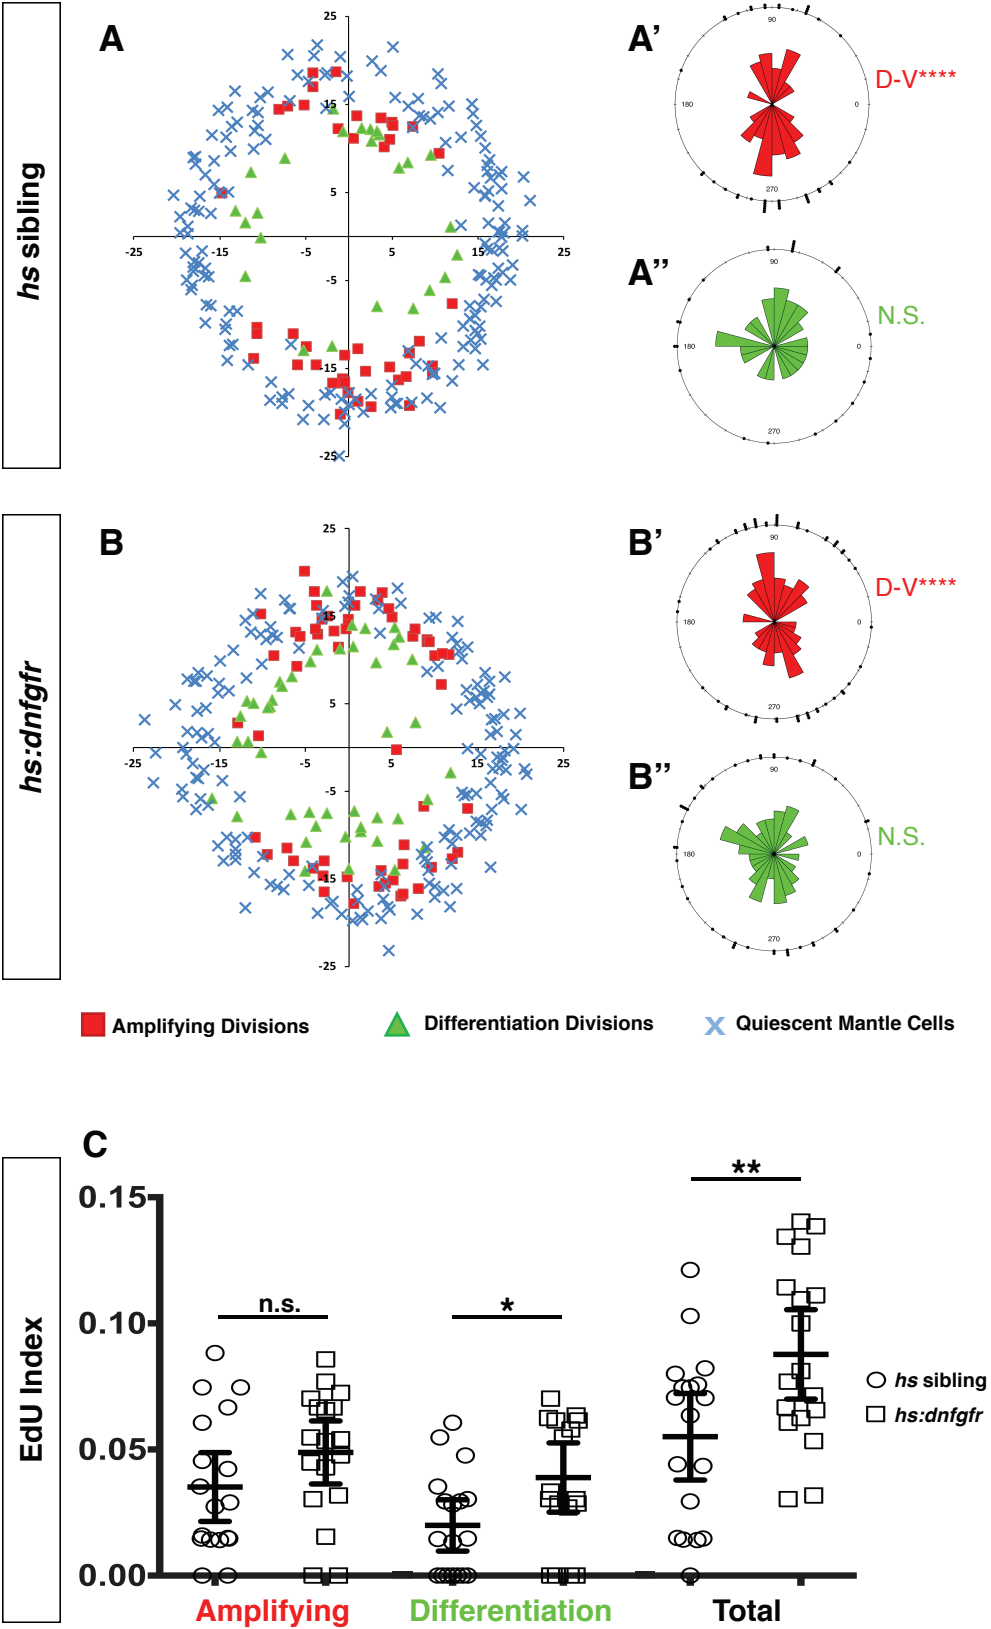

Supplement: supp [file elife-44431-supp-v1.zip › elife_poa_e44431_Figure_6_figure_supplement_1.pdf]

Figure 2-figure supplement 1

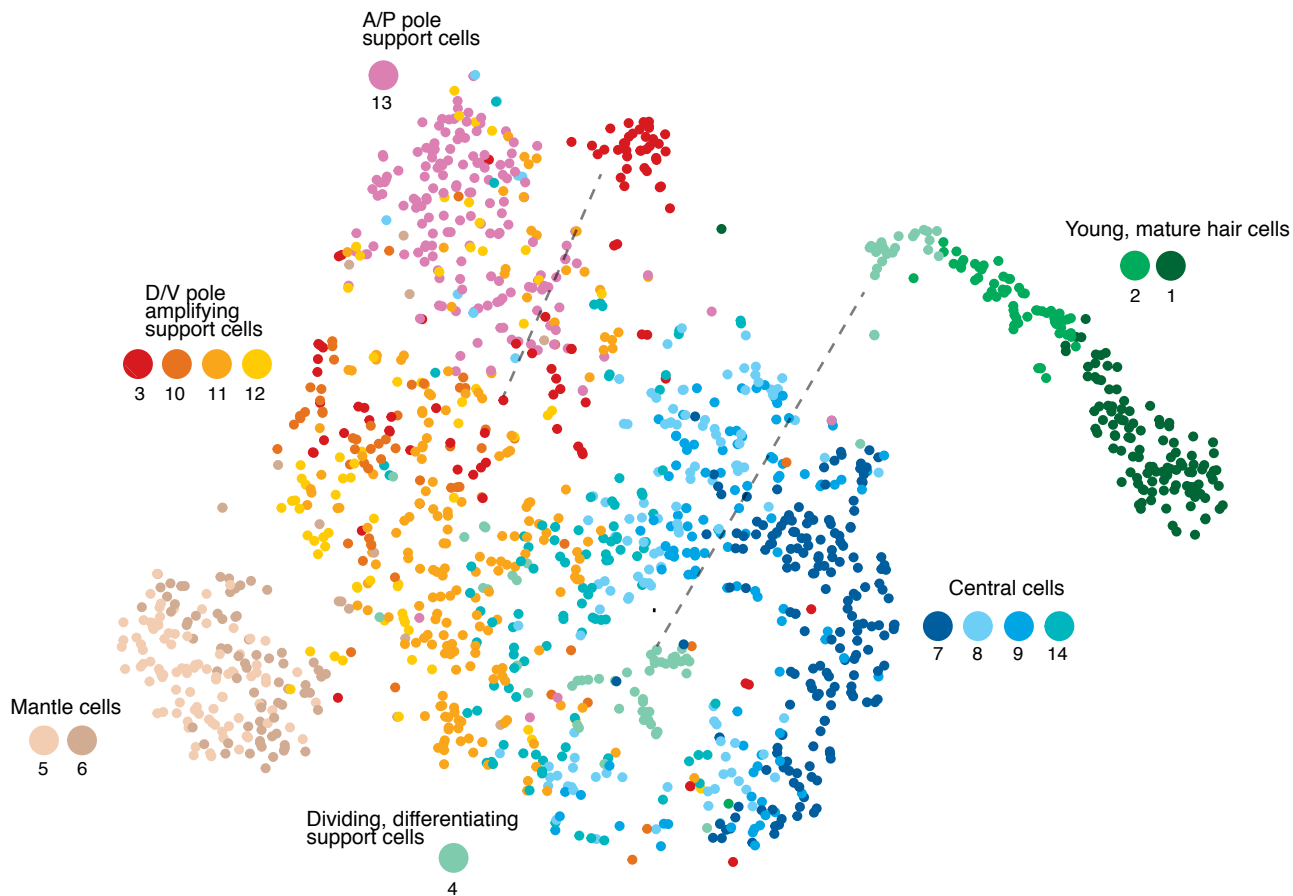

Supplement: supp [file elife-44431-supp-v1.zip › elife_poa_e44431_Figure_2_figure_supplement_1.pdf]

**Figure 3-figure supplement 2**

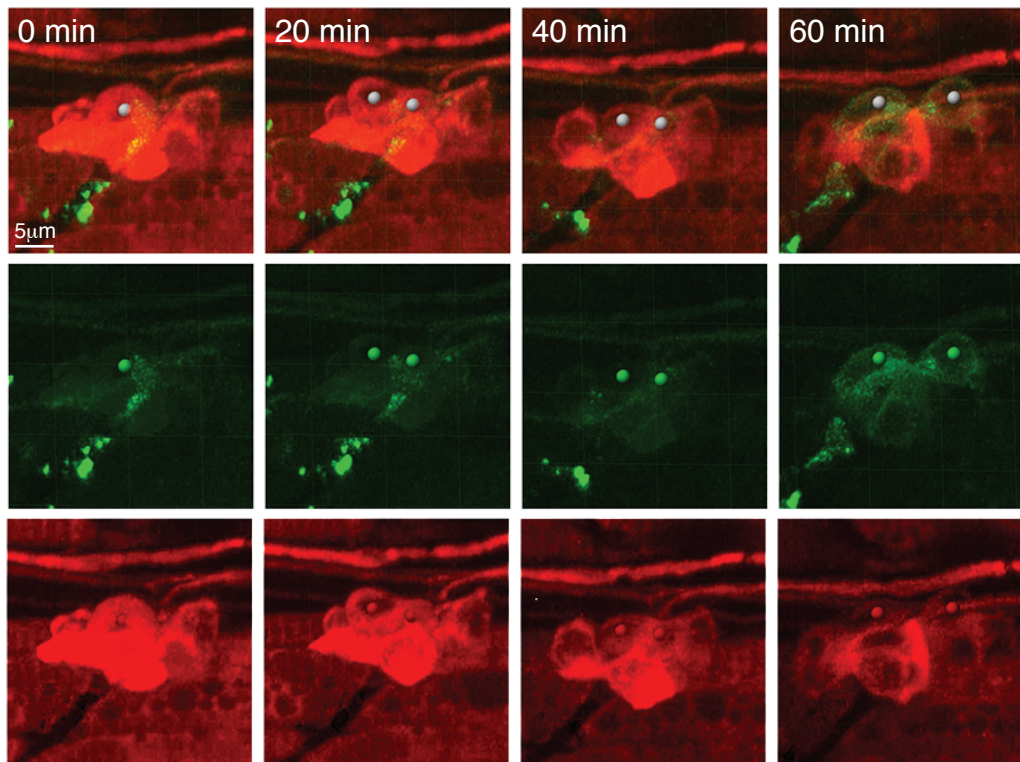

Supplement: supp [file elife-44431-supp-v1.zip › elife_poa_e44431_Figure_3_figure_supplement_2.pdf]

Figure 7-figure supplement 1

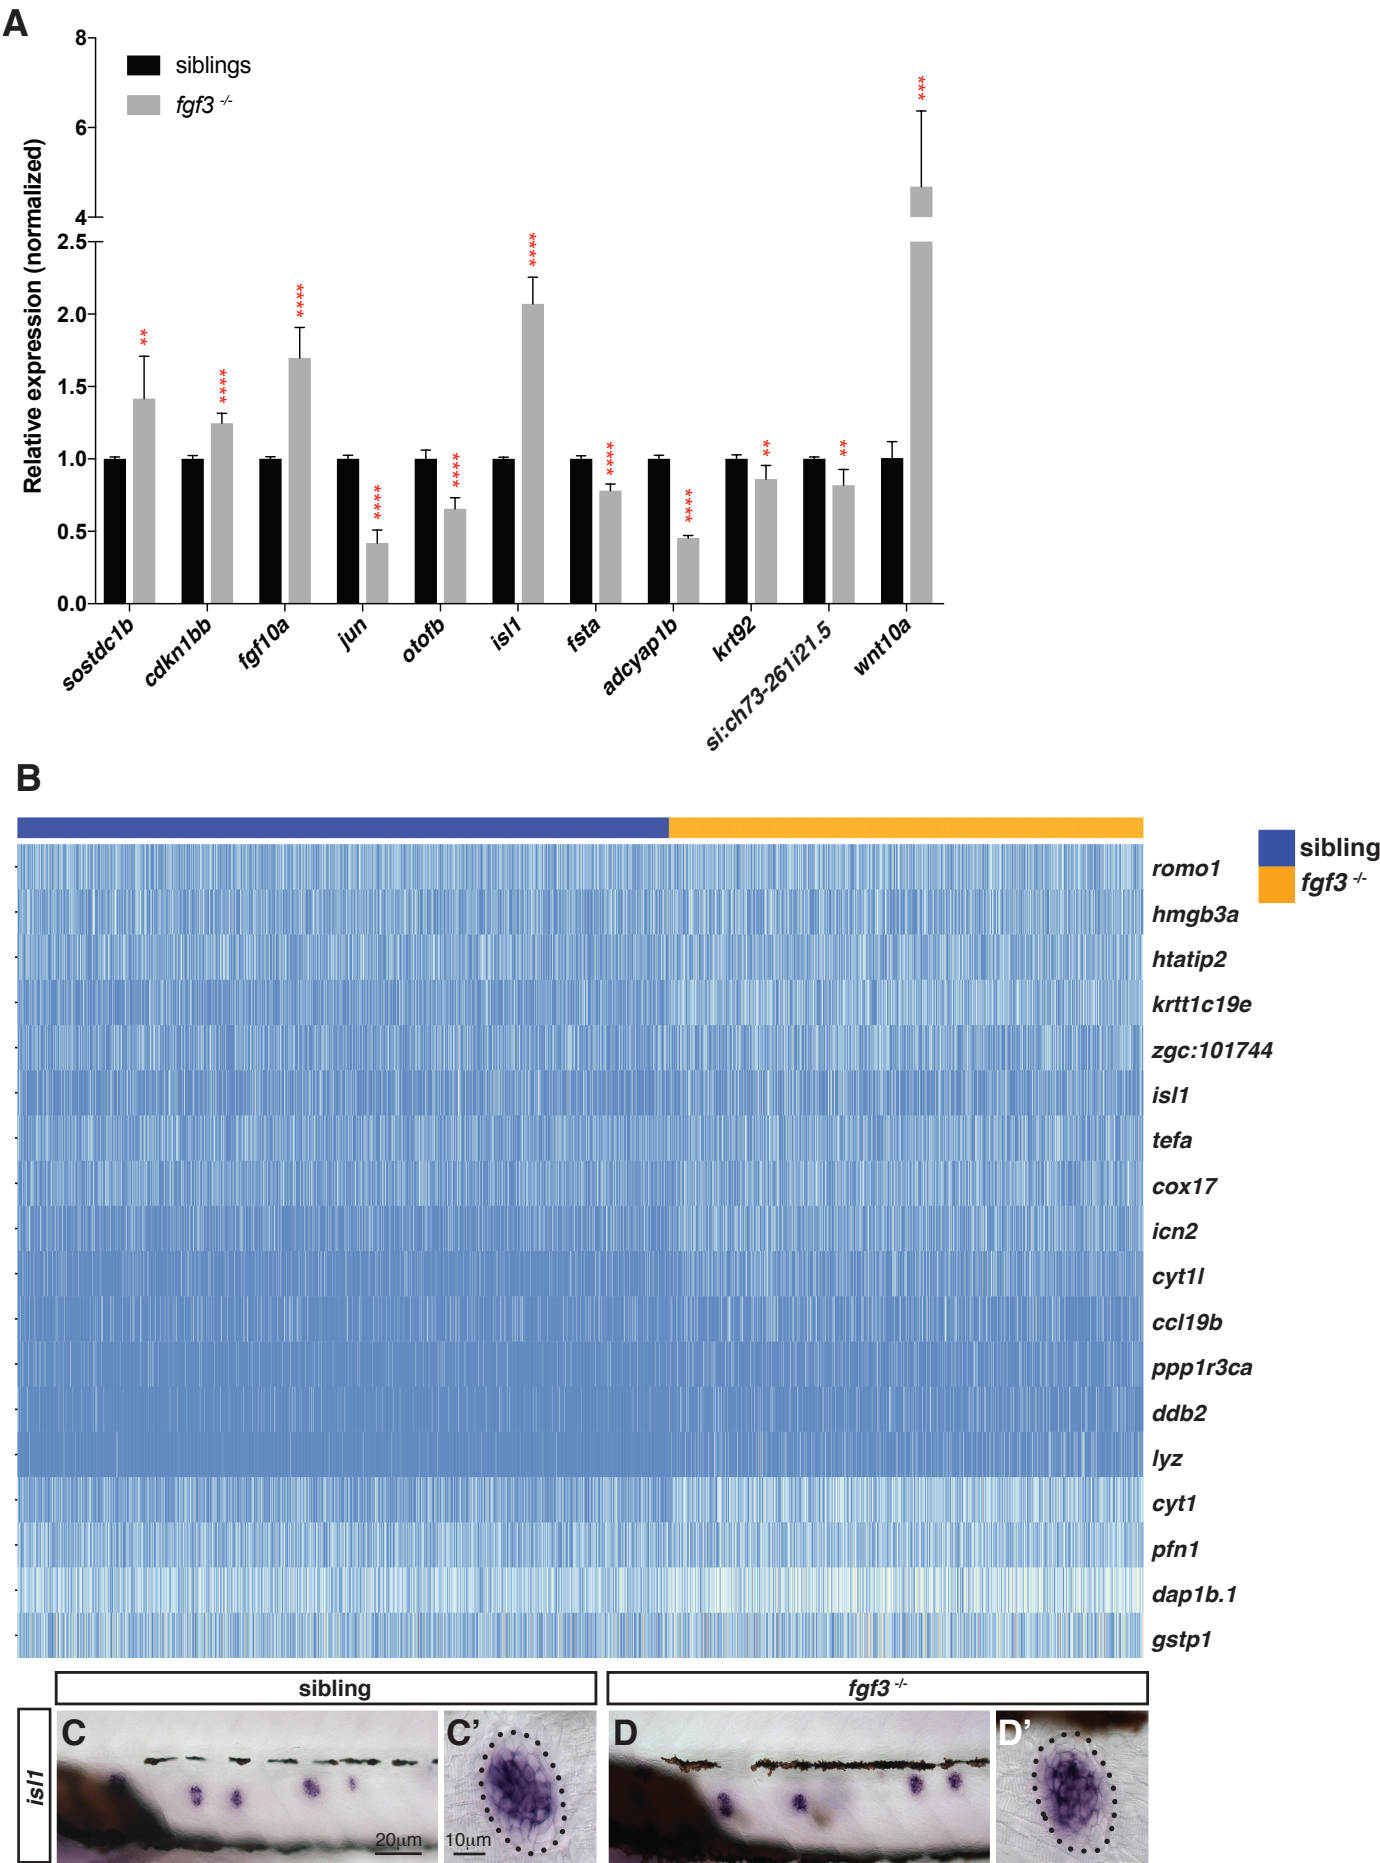

Supplement: supp [file elife-44431-supp-v1.zip › elife_poa_e44431_Figure_7_figure_supplement_1.pdf]
